# Supplementary material for: AP-2α and AP-2β cooperatively function in the craniofacial surface ectoderm to regulate chromatin and gene expression dynamics during facial development
Source: eLife journal article supplement (doi:10.7554/elife.70511), 2022-03-25
Supplement: supp [file elife-70511-supp-v1.zip]

# Homer Known Motif Enrichment Results (/Users/vanottee/output/)

[Homer de novo Motif Results](#)
[Gene Ontology Enrichment Results](#)
[Known Motif Enrichment Results \(txt file\)](#)

Total Target Sequences = 9244, Total Background Sequences = 39886

| Rank | Motif | Name                                                              | P-value | log P-value | q-value (Benjamini) | # Target Sequences with Motif | % of Targets Sequences with Motif | # Background Sequences with Motif | % of Background Sequences with Motif | Motif File                          | SVG                 |
|------|-------|-------------------------------------------------------------------|---------|-------------|---------------------|-------------------------------|-----------------------------------|-----------------------------------|--------------------------------------|-------------------------------------|---------------------|
| 1    |       | CTCF(Zf)/CD4+-CTCF-ChIP-Seq(Barski_et_al.)/Homer                  | 1e-2372 | -5.463e+03  | 0.0000              | 3914.0                        | 42.34%                            | 2133.9                            | 5.35%                                | <a href="#">motif file (matrix)</a> | <a href="#">svg</a> |
| 2    |       | BORIS(Zf)/K562-CTCF-ChIP-Seq(GSE32465)/Homer                      | 1e-1935 | -4.456e+03  | 0.0000              | 4311.0                        | 46.64%                            | 3599.7                            | 9.02%                                | <a href="#">motif file (matrix)</a> | <a href="#">svg</a> |
| 3    |       | Sp1(Zf)/Promoter/Homer                                            | 1e-93   | -2.156e+02  | 0.0000              | 2017.0                        | 21.82%                            | 5549.3                            | 13.91%                               | <a href="#">motif file (matrix)</a> | <a href="#">svg</a> |
| 4    |       | Rfx2(HTH)/LoVo-RFX2-ChIP-Seq(GSE49402)/Homer                      | 1e-85   | -1.979e+02  | 0.0000              | 674.0                         | 7.29%                             | 1247.8                            | 3.13%                                | <a href="#">motif file (matrix)</a> | <a href="#">svg</a> |
| 5    |       | RFX(HTH)/K562-RFX3-ChIP-Seq(SRA012198)/Homer                      | 1e-85   | -1.974e+02  | 0.0000              | 649.0                         | 7.02%                             | 1179.5                            | 2.96%                                | <a href="#">motif file (matrix)</a> | <a href="#">svg</a> |
| 6    |       | X-box(HTH)/NPC-H3K4me1-ChIP-Seq(GSE16256)/Homer                   | 1e-60   | -1.384e+02  | 0.0000              | 603.0                         | 6.52%                             | 1248.3                            | 3.13%                                | <a href="#">motif file (matrix)</a> | <a href="#">svg</a> |
| 7    |       | Zfp281(Zf)/ES-Zfp281-ChIP-Seq(GSE81042)/Homer                     | 1e-56   | -1.305e+02  | 0.0000              | 1602.0                        | 17.33%                            | 4660.4                            | 11.68%                               | <a href="#">motif file (matrix)</a> | <a href="#">svg</a> |
| 8    |       | CTCF-SatelliteElement(Zf)/CD4+-CTCF-ChIP-Seq(Barski_et_al.)/Homer | 1e-50   | -1.165e+02  | 0.0000              | 188.0                         | 2.03%                             | 214.1                             | 0.54%                                | <a href="#">motif file (matrix)</a> | <a href="#">svg</a> |
| 9    |       | KLF3(Zf)/MEF-Klf3-ChIP-Seq(GSE44748)/Homer                        | 1e-44   | -1.035e+02  | 0.0000              | 2737.0                        | 29.61%                            | 9265.8                            | 23.22%                               | <a href="#">motif file (matrix)</a> | <a href="#">svg</a> |
| 10   |       | Klf9(Zf)/GBM-Klf9-ChIP-Seq(GSE62211)/Homer                        | 1e-44   | -1.019e+02  | 0.0000              | 2313.0                        | 25.02%                            | 7614.8                            | 19.08%                               | <a href="#">motif file (matrix)</a> | <a href="#">svg</a> |
| 11   |       | Sp5(Zf)/mES-Sp5.Flag-ChIP-Seq(GSE72989)/Homer                     | 1e-41   | -9.551e+01  | 0.0000              | 4390.0                        | 47.49%                            | 16165.6                           | 40.51%                               | <a href="#">motif file (matrix)</a> | <a href="#">svg</a> |
| 12   |       | Zic3(Zf)/mES-Zic3-ChIP-Seq(GSE37889)/Homer                        | 1e-34   | -7.877e+01  | 0.0000              | 2676.0                        | 28.95%                            | 9339.8                            | 23.40%                               | <a href="#">motif file (matrix)</a> | <a href="#">svg</a> |
| 13   |       | Rfx1(HTH)/NPC-H3K4me1-ChIP-Seq(GSE16256)/Homer                    | 1e-29   | -6.745e+01  | 0.0000              | 921.0                         | 9.96%                             | 2716.0                            | 6.81%                                | <a href="#">motif file (matrix)</a> | <a href="#">svg</a> |
| 14   |       | REST-NRSF(Zf)/Jurkat-NRSF-ChIP-Seq/Homer                          | 1e-25   | -5.969e+01  | 0.0000              | 107.0                         | 1.16%                             | 134.2                             | 0.34%                                | <a href="#">motif file (matrix)</a> | <a href="#">svg</a> |
| 15   |       | Tcf12(bHLH)/GM12878-Tcf12-ChIP-                                   | 1e-     | -5.774e+01  | 0.0000              | 3588.0                        | 38.81%                            | 13417.2                           | 33.62%                               | <a href="#">motif</a>               | <a href="#">svg</a> |

|    |                                                                                     |                                                               |       |            |        |        |        |         |        |                                     |                     |
|----|-------------------------------------------------------------------------------------|---------------------------------------------------------------|-------|------------|--------|--------|--------|---------|--------|-------------------------------------|---------------------|
|    |     | Seq(GSE32465)/Homer                                           | 25    |            |        |        |        |         |        | <a href="#">file (matrix)</a>       |                     |
| 16 |    | Egr2(Zf)/Thymocytes-Egr2-ChIP-Seq(GSE34254)/Homer             | 1e-22 | -5.253e+01 | 0.0000 | 968.0  | 10.47% | 3028.9  | 7.59%  | <a href="#">motif file (matrix)</a> | <a href="#">svg</a> |
| 17 |    | E2F3(E2F)/MEF-E2F3-ChIP-Seq(GSE71376)/Homer                   | 1e-21 | -5.063e+01 | 0.0000 | 2440.0 | 26.40% | 8818.1  | 22.10% | <a href="#">motif file (matrix)</a> | <a href="#">svg</a> |
| 18 |    | E2F4(E2F)/K562-E2F4-ChIP-Seq(GSE31477)/Homer                  | 1e-21 | -4.977e+01 | 0.0000 | 1760.0 | 19.04% | 6109.6  | 15.31% | <a href="#">motif file (matrix)</a> | <a href="#">svg</a> |
| 19 |    | Bcl11a(Zf)/HSPC-BCL11A-ChIP-Seq(GSE104676)/Homer              | 1e-20 | -4.806e+01 | 0.0000 | 2378.0 | 25.72% | 8612.0  | 21.58% | <a href="#">motif file (matrix)</a> | <a href="#">svg</a> |
| 20 |    | KLF1(Zf)/HUDEP2-KLF1-CutnRun(GSE136251)/Homer                 | 1e-20 | -4.636e+01 | 0.0000 | 3890.0 | 42.08% | 14910.9 | 37.37% | <a href="#">motif file (matrix)</a> | <a href="#">svg</a> |
| 21 |    | Zfp57(Zf)/H1-ZFP57.HA-ChIP-Seq(GSE115387)/Homer               | 1e-19 | -4.553e+01 | 0.0000 | 1551.0 | 16.78% | 5349.3  | 13.40% | <a href="#">motif file (matrix)</a> | <a href="#">svg</a> |
| 22 |    | Zic2(Zf)/ESC-Zic2-ChIP-Seq(SRP197560)/Homer                   | 1e-17 | -3.981e+01 | 0.0000 | 2048.0 | 22.15% | 7423.1  | 18.60% | <a href="#">motif file (matrix)</a> | <a href="#">svg</a> |
| 23 |    | Unknown-ESC-element(?)/mES-Nanog-ChIP-Seq(GSE11724)/Homer     | 1e-17 | -3.923e+01 | 0.0000 | 2327.0 | 25.17% | 8566.6  | 21.47% | <a href="#">motif file (matrix)</a> | <a href="#">svg</a> |
| 24 |    | Klf4(Zf)/mES-Klf4-ChIP-Seq(GSE11431)/Homer                    | 1e-15 | -3.513e+01 | 0.0000 | 1856.0 | 20.08% | 6735.7  | 16.88% | <a href="#">motif file (matrix)</a> | <a href="#">svg</a> |
| 25 |    | WT1(Zf)/Kidney-WT1-ChIP-Seq(GSE90016)/Homer                   | 1e-15 | -3.462e+01 | 0.0000 | 2514.0 | 27.20% | 9426.5  | 23.62% | <a href="#">motif file (matrix)</a> | <a href="#">svg</a> |
| 26 |    | E2F6(E2F)/Hela-E2F6-ChIP-Seq(GSE31477)/Homer                  | 1e-13 | -3.126e+01 | 0.0000 | 2016.0 | 21.81% | 7459.3  | 18.69% | <a href="#">motif file (matrix)</a> | <a href="#">svg</a> |
| 27 |   | NeuroD1(bHLH)/Islet-NeuroD1-ChIP-Seq(GSE30298)/Homer          | 1e-13 | -3.114e+01 | 0.0000 | 2792.0 | 30.20% | 10654.7 | 26.70% | <a href="#">motif file (matrix)</a> | <a href="#">svg</a> |
| 28 |  | c-Myc(bHLH)/LNCAP-cMyc-ChIP-Seq(Unpublished)/Homer            | 1e-12 | -2.844e+01 | 0.0000 | 1591.0 | 17.21% | 5796.3  | 14.52% | <a href="#">motif file (matrix)</a> | <a href="#">svg</a> |
| 29 |  | E2F1(E2F)/Hela-E2F1-ChIP-Seq(GSE22478)/Homer                  | 1e-12 | -2.802e+01 | 0.0000 | 1005.0 | 10.87% | 3478.6  | 8.72%  | <a href="#">motif file (matrix)</a> | <a href="#">svg</a> |
| 30 |  | Six4(Homeobox)/MCF7-SIX4-ChIP-Seq(Encode)/Homer               | 1e-11 | -2.706e+01 | 0.0000 | 178.0  | 1.93%  | 435.8   | 1.09%  | <a href="#">motif file (matrix)</a> | <a href="#">svg</a> |
| 31 |  | Oct11(POU,Homeobox)/NCIH1048-POU2F3-ChIP-seq(GSE115123)/Homer | 1e-11 | -2.544e+01 | 0.0000 | 625.0  | 6.76%  | 2052.1  | 5.14%  | <a href="#">motif file (matrix)</a> | <a href="#">svg</a> |
| 32 |  | Rfx5(HTH)/GM12878-Rfx5-ChIP-Seq(GSE31477)/Homer               | 1e-10 | -2.492e+01 | 0.0000 | 1208.0 | 13.07% | 4331.7  | 10.85% | <a href="#">motif file (matrix)</a> | <a href="#">svg</a> |
| 33 |                                                                                     | Myf5(bHLH)/GM-Myf5-ChIP-                                      | 1e-9  | -2.160e+01 | 0.0000 | 2478.0 | 26.81% | 9593.1  | 24.04% | <a href="#">motif</a>               | <a href="#">svg</a> |

|    |  | Seq(GSE24852)/Homer                                        |      |            |        |        |        |         |        | <a href="#">file (matrix)</a>       |                     |
|----|--|------------------------------------------------------------|------|------------|--------|--------|--------|---------|--------|-------------------------------------|---------------------|
| 34 |  | MyoD(bHLH)/Myotube-MyoD-ChIP-Seq(GSE21614)/Homer           | 1e-9 | -2.135e+01 | 0.0000 | 2866.0 | 31.00% | 11222.0 | 28.12% | <a href="#">motif file (matrix)</a> | <a href="#">svg</a> |
| 35 |  | Egr1(Zf)/K562-Egr1-ChIP-Seq(GSE32465)/Homer                | 1e-8 | -1.930e+01 | 0.0000 | 2769.0 | 29.95% | 10876.9 | 27.26% | <a href="#">motif file (matrix)</a> | <a href="#">svg</a> |
| 36 |  | NF1(CTF)/LNCAP-NF1-ChIP-Seq(Unpublished)/Homer             | 1e-8 | -1.883e+01 | 0.0000 | 1395.0 | 15.09% | 5209.5  | 13.05% | <a href="#">motif file (matrix)</a> | <a href="#">svg</a> |
| 37 |  | E-box(bHLH)/Promoter/Homer                                 | 1e-8 | -1.868e+01 | 0.0000 | 323.0  | 3.49%  | 1004.6  | 2.52%  | <a href="#">motif file (matrix)</a> | <a href="#">svg</a> |
| 38 |  | Dlx3(Homeobox)/Keratinocytes-Dlx3-ChIP-Seq(GSE89884)/Homer | 1e-7 | -1.752e+01 | 0.0000 | 1146.0 | 12.40% | 4232.1  | 10.61% | <a href="#">motif file (matrix)</a> | <a href="#">svg</a> |
| 39 |  | DLX5(Homeobox)/BasalGanglia-Dlx5-ChIP-seq(GSE124936)/Homer | 1e-7 | -1.745e+01 | 0.0000 | 1393.0 | 15.07% | 5234.0  | 13.12% | <a href="#">motif file (matrix)</a> | <a href="#">svg</a> |
| 40 |  | TEAD1(TEAD)/HepG2-TEAD1-ChIP-Seq(Encode)/Homer             | 1e-7 | -1.626e+01 | 0.0000 | 2291.0 | 24.78% | 8973.0  | 22.49% | <a href="#">motif file (matrix)</a> | <a href="#">svg</a> |
| 41 |  | E2F7(E2F)/Hela-E2F7-ChIP-Seq(GSE32673)/Homer               | 1e-6 | -1.596e+01 | 0.0000 | 505.0  | 5.46%  | 1725.7  | 4.32%  | <a href="#">motif file (matrix)</a> | <a href="#">svg</a> |
| 42 |  | THRb(NR)/HepG2-THRb.Flag-ChIP-Seq(Encode)/Homer            | 1e-6 | -1.557e+01 | 0.0000 | 2086.0 | 22.57% | 8140.6  | 20.40% | <a href="#">motif file (matrix)</a> | <a href="#">svg</a> |
| 43 |  | bHLHE40(bHLH)/HepG2-BHLHE40-ChIP-Seq(GSE31477)/Homer       | 1e-6 | -1.556e+01 | 0.0000 | 1005.0 | 10.87% | 3708.7  | 9.29%  | <a href="#">motif file (matrix)</a> | <a href="#">svg</a> |
| 44 |  | Zfp809(Zf)/ES-Zfp809-ChIP-Seq(GSE70799)/Homer              | 1e-6 | -1.528e+01 | 0.0000 | 920.0  | 9.95%  | 3373.4  | 8.45%  | <a href="#">motif file (matrix)</a> | <a href="#">svg</a> |
| 45 |  | HIF2a(bHLH)/785_O-HIF2a-ChIP-Seq(GSE34871)/Homer           | 1e-6 | -1.416e+01 | 0.0000 | 1051.0 | 11.37% | 3926.5  | 9.84%  | <a href="#">motif file (matrix)</a> | <a href="#">svg</a> |
| 46 |  | TEAD(TEA)/Fibroblast-PU.1-ChIP-Seq(Unpublished)/Homer      | 1e-6 | -1.387e+01 | 0.0000 | 1482.0 | 16.03% | 5693.7  | 14.27% | <a href="#">motif file (matrix)</a> | <a href="#">svg</a> |
| 47 |  | Oct4(POU,Homeobox)/mES-Oct4-ChIP-Seq(GSE11431)/Homer       | 1e-5 | -1.364e+01 | 0.0000 | 807.0  | 8.73%  | 2956.8  | 7.41%  | <a href="#">motif file (matrix)</a> | <a href="#">svg</a> |
| 48 |  | CRE(bZIP)/Promoter/Homer                                   | 1e-5 | -1.363e+01 | 0.0000 | 729.0  | 7.89%  | 2645.3  | 6.63%  | <a href="#">motif file (matrix)</a> | <a href="#">svg</a> |
| 49 |  | TFE3(bHLH)/MEF-TFE3-ChIP-Seq(GSE75757)/Homer               | 1e-5 | -1.359e+01 | 0.0000 | 288.0  | 3.12%  | 932.7   | 2.34%  | <a href="#">motif file (matrix)</a> | <a href="#">svg</a> |
| 50 |  | JunD(bZIP)/K562-JunD-ChIP-Seq/Homer                        | 1e-5 | -1.298e+01 | 0.0000 | 282.0  | 3.05%  | 917.8   | 2.30%  | <a href="#">motif file (matrix)</a> | <a href="#">svg</a> |
| 51 |  | NFkB-p50,p52(RHD)/Monocyte-p50-                            | 1e-5 | -1.254e+01 | 0.0000 | 443.0  | 4.79%  | 1539.2  | 3.86%  | <a href="#">motif</a>               | <a href="#">svg</a> |

|    |     | ChIP-Chip(Schreiber_et_al.)/Homer                              |      |            |        |        |        |         |        |                                     | <a href="#">file (matrix)</a> |  |
|----|-------------------------------------------------------------------------------------|----------------------------------------------------------------|------|------------|--------|--------|--------|---------|--------|-------------------------------------|-------------------------------|--|
| 52 |    | Tcfcp211(CP2)/mES-Tcfcp211-ChIP-Seq(GSE11431)/Homer            | 1e-5 | -1.197e+01 | 0.0001 | 602.0  | 6.51%  | 2174.1  | 5.45%  | <a href="#">motif file (matrix)</a> | <a href="#">svg</a>           |  |
| 53 |    | KLF6(Zf)/PDAC-KLF6-ChIP-Seq(GSE64557)/Homer                    | 1e-5 | -1.193e+01 | 0.0001 | 4009.0 | 43.37% | 16412.3 | 41.13% | <a href="#">motif file (matrix)</a> | <a href="#">svg</a>           |  |
| 54 |    | EBF(EBF)/proBcell-EBF-ChIP-Seq(GSE21978)/Homer                 | 1e-5 | -1.189e+01 | 0.0001 | 829.0  | 8.97%  | 3084.6  | 7.73%  | <a href="#">motif file (matrix)</a> | <a href="#">svg</a>           |  |
| 55 |    | Oct2(POU,Homeobox)/Bcell-Oct2-ChIP-Seq(GSE21512)/Homer         | 1e-5 | -1.163e+01 | 0.0001 | 483.0  | 5.23%  | 1711.8  | 4.29%  | <a href="#">motif file (matrix)</a> | <a href="#">svg</a>           |  |
| 56 |    | Usf2(bHLH)/C2C12-Usf2-ChIP-Seq(GSE36030)/Homer                 | 1e-4 | -1.148e+01 | 0.0001 | 900.0  | 9.74%  | 3381.4  | 8.47%  | <a href="#">motif file (matrix)</a> | <a href="#">svg</a>           |  |
| 57 |    | TEAD4(TEA)/Tropoblast-Tead4-ChIP-Seq(GSE37350)/Homer           | 1e-4 | -1.130e+01 | 0.0001 | 2145.0 | 23.20% | 8533.2  | 21.38% | <a href="#">motif file (matrix)</a> | <a href="#">svg</a>           |  |
| 58 |    | HIF-1a(bHLH)/MCF7-HIF1a-ChIP-Seq(GSE28352)/Homer               | 1e-4 | -1.119e+01 | 0.0001 | 776.0  | 8.39%  | 2887.5  | 7.24%  | <a href="#">motif file (matrix)</a> | <a href="#">svg</a>           |  |
| 59 |    | Sox4(HMG)/proB-Sox4-ChIP-Seq(GSE50066)/Homer                   | 1e-4 | -1.085e+01 | 0.0001 | 2059.0 | 22.27% | 8190.3  | 20.52% | <a href="#">motif file (matrix)</a> | <a href="#">svg</a>           |  |
| 60 |    | Brn1(POU,Homeobox)/NPC-Brn1-ChIP-Seq(GSE35496)/Homer           | 1e-4 | -1.044e+01 | 0.0002 | 583.0  | 6.31%  | 2131.0  | 5.34%  | <a href="#">motif file (matrix)</a> | <a href="#">svg</a>           |  |
| 61 |    | PBX1(Homeobox)/MCF7-PBX1-ChIP-Seq(GSE28007)/Homer              | 1e-4 | -1.040e+01 | 0.0002 | 328.0  | 3.55%  | 1128.3  | 2.83%  | <a href="#">motif file (matrix)</a> | <a href="#">svg</a>           |  |
| 62 |   | Six2(Homeobox)/NephronProgenitor-Six2-ChIP-Seq(GSE39837)/Homer | 1e-4 | -1.039e+01 | 0.0002 | 2188.0 | 23.67% | 8749.4  | 21.93% | <a href="#">motif file (matrix)</a> | <a href="#">svg</a>           |  |
| 63 |  | Ascl2(bHLH)/ESC-Ascl2-ChIP-Seq(GSE97712)/Homer                 | 1e-4 | -1.035e+01 | 0.0002 | 3868.0 | 41.84% | 15881.4 | 39.80% | <a href="#">motif file (matrix)</a> | <a href="#">svg</a>           |  |
| 64 |  | Six1(Homeobox)/Myoblast-Six1-ChIP-Chip(GSE20150)/Homer         | 1e-4 | -1.034e+01 | 0.0002 | 611.0  | 6.61%  | 2244.8  | 5.63%  | <a href="#">motif file (matrix)</a> | <a href="#">svg</a>           |  |
| 65 |  | USF1(bHLH)/GM12878-Usf1-ChIP-Seq(GSE32465)/Homer               | 1e-4 | -9.828e+00 | 0.0004 | 1357.0 | 14.68% | 5303.1  | 13.29% | <a href="#">motif file (matrix)</a> | <a href="#">svg</a>           |  |
| 66 |  | TEAD3(TEA)/HepG2-TEAD3-ChIP-Seq(Encode)/Homer                  | 1e-3 | -9.173e+00 | 0.0007 | 2558.0 | 27.67% | 10361.7 | 25.97% | <a href="#">motif file (matrix)</a> | <a href="#">svg</a>           |  |
| 67 |  | Lhx1(Homeobox)/EmbryoCarcinoma-Lhx1-ChIP-Seq(GSE70957)/Homer   | 1e-3 | -9.000e+00 | 0.0008 | 1889.0 | 20.43% | 7551.7  | 18.92% | <a href="#">motif file (matrix)</a> | <a href="#">svg</a>           |  |
| 68 |  | NRF1(NRF)/MCF7-NRF1-ChIP-Seq(Unpublished)/Homer                | 1e-3 | -8.675e+00 | 0.0011 | 686.0  | 7.42%  | 2586.5  | 6.48%  | <a href="#">motif file (matrix)</a> | <a href="#">svg</a>           |  |
| 69 |                                                                                     | p73(p53)/Trachea-p73-ChIP-                                     | 1e-3 | -8.398e+00 | 0.0014 | 177.0  | 1.91%  | 580.4   | 1.45%  | <a href="#">motif</a>               | <a href="#">svg</a>           |  |



|    |  |                                                               |      |            |        |        |        |         |        |                                     |                     |
|----|--|---------------------------------------------------------------|------|------------|--------|--------|--------|---------|--------|-------------------------------------|---------------------|
|    |  | Seq(PRJNA310161)/Homer                                        |      |            |        |        |        |         |        | <a href="#">file (matrix)</a>       |                     |
| 70 |  | NFkB-p65-Rel(RHD)/ThioMac-LPS-Expression(GSE23622)/Homer      | 1e-3 | -7.790e+00 | 0.0026 | 163.0  | 1.76%  | 535.7   | 1.34%  | <a href="#">motif file (matrix)</a> | <a href="#">svg</a> |
| 71 |  | ZNF519(Zf)/HEK293-ZNF519.GFP-ChIP-Seq(GSE58341)/Homer         | 1e-3 | -7.349e+00 | 0.0040 | 984.0  | 10.64% | 3846.8  | 9.64%  | <a href="#">motif file (matrix)</a> | <a href="#">svg</a> |
| 72 |  | En1(Homeobox)/SUM149-EN1-ChIP-Seq(GSE120957)/Homer            | 1e-3 | -7.085e+00 | 0.0051 | 3274.0 | 35.42% | 13512.4 | 33.86% | <a href="#">motif file (matrix)</a> | <a href="#">svg</a> |
| 73 |  | HINFP(Zf)/K562-HINFP.eGFP-ChIP-Seq(Encode)/Homer              | 1e-2 | -6.395e+00 | 0.0100 | 1179.0 | 12.75% | 4691.9  | 11.76% | <a href="#">motif file (matrix)</a> | <a href="#">svg</a> |
| 74 |  | DLX1(Homeobox)/BasalGanglia-Dlx1-ChIP-seq(GSE124936)/Homer    | 1e-2 | -6.198e+00 | 0.0120 | 2285.0 | 24.72% | 9354.9  | 23.44% | <a href="#">motif file (matrix)</a> | <a href="#">svg</a> |
| 75 |  | TEAD2(TEA)/Py2T-Tead2-ChIP-Seq(GSE55709)/Homer                | 1e-2 | -5.788e+00 | 0.0179 | 1291.0 | 13.97% | 5185.8  | 13.00% | <a href="#">motif file (matrix)</a> | <a href="#">svg</a> |
| 76 |  | Tcf3(HMG)/mES-Tcf3-ChIP-Seq(GSE11724)/Homer                   | 1e-2 | -5.630e+00 | 0.0207 | 602.0  | 6.51%  | 2331.0  | 5.84%  | <a href="#">motif file (matrix)</a> | <a href="#">svg</a> |
| 77 |  | Tlx?(NR)/NPC-H3K4me1-ChIP-Seq(GSE16256)/Homer                 | 1e-2 | -5.394e+00 | 0.0259 | 1509.0 | 16.32% | 6119.7  | 15.34% | <a href="#">motif file (matrix)</a> | <a href="#">svg</a> |
| 78 |  | Lhx2(Homeobox)/HFSC-Lhx2-ChIP-Seq(GSE48068)/Homer             | 1e-2 | -5.329e+00 | 0.0272 | 1842.0 | 19.93% | 7527.8  | 18.86% | <a href="#">motif file (matrix)</a> | <a href="#">svg</a> |
| 79 |  | EKLF(Zf)/Erythrocyte-Klf1-ChIP-Seq(GSE20478)/Homer            | 1e-2 | -5.306e+00 | 0.0275 | 834.0  | 9.02%  | 3300.2  | 8.27%  | <a href="#">motif file (matrix)</a> | <a href="#">svg</a> |
| 80 |  | Tcf21(bHLH)/ArterySmoothMuscle-Tcf21-ChIP-Seq(GSE61369)/Homer | 1e-2 | -5.194e+00 | 0.0304 | 3064.0 | 33.15% | 12732.0 | 31.91% | <a href="#">motif file (matrix)</a> | <a href="#">svg</a> |
| 81 |  | Tbx20(T-box)/Heart-Tbx20-ChIP-Seq(GSE29636)/Homer             | 1e-2 | -5.058e+00 | 0.0344 | 644.0  | 6.97%  | 2523.8  | 6.32%  | <a href="#">motif file (matrix)</a> | <a href="#">svg</a> |
| 82 |  | Lhx3(Homeobox)/Neuron-Lhx3-ChIP-Seq(GSE31456)/Homer           | 1e-2 | -5.025e+00 | 0.0351 | 2755.0 | 29.80% | 11424.8 | 28.63% | <a href="#">motif file (matrix)</a> | <a href="#">svg</a> |
| 83 |  | Oct6(POU,Homeobox)/NPC-Pou3f1-ChIP-Seq(GSE35496)/Homer        | 1e-2 | -4.960e+00 | 0.0370 | 729.0  | 7.89%  | 2878.9  | 7.21%  | <a href="#">motif file (matrix)</a> | <a href="#">svg</a> |
| 84 |  | Atf4(bZIP)/MEF-Atf4-ChIP-Seq(GSE35681)/Homer                  | 1e-2 | -4.916e+00 | 0.0382 | 463.0  | 5.01%  | 1784.8  | 4.47%  | <a href="#">motif file (matrix)</a> | <a href="#">svg</a> |
| 85 |  | LXH9(Homeobox)/Hct116-LXH9.V5-ChIP-Seq(GSE116822)/Homer       | 1e-2 | -4.832e+00 | 0.0411 | 2581.0 | 27.92% | 10695.6 | 26.80% | <a href="#">motif file (matrix)</a> | <a href="#">svg</a> |
| 86 |  | DLX2(Homeobox)/BasalGanglia-Dlx2-ChIP-seq(GSE124936)/Homer    | 1e-2 | -4.795e+00 | 0.0421 | 2541.0 | 27.49% | 10527.5 | 26.38% | <a href="#">motif file (matrix)</a> | <a href="#">svg</a> |
| 87 |  | E2F(E2F)/Hela-CellCycle-                                      | 1e-2 | -4.720e+00 | 0.0449 | 227.0  | 2.46%  | 834.2   | 2.09%  | <a href="#">motif</a>               | <a href="#">svg</a> |

|                                                                                  |                  |  |  |  |  |  |  |  |  |  |                               |
|----------------------------------------------------------------------------------|------------------|--|--|--|--|--|--|--|--|--|-------------------------------|
|  | Expression/Homer |  |  |  |  |  |  |  |  |  | <a href="#">file (matrix)</a> |
|                                                                                  |                  |  |  |  |  |  |  |  |  |  |                               |
