# Supplementary material for: AP-2α and AP-2β cooperatively function in the craniofacial surface ectoderm to regulate chromatin and gene expression dynamics during facial development
Source: eLife journal article supplement (doi:10.7554/elife.70511), 2022-03-25
Supplement: supp [file elife-70511-supp-v1.zip]

⊕ Job Description

⊕ Region-Gene Association Graphs

What do these graphs illustrate?

Number of associated genes per region

[Download as PDF.](#)

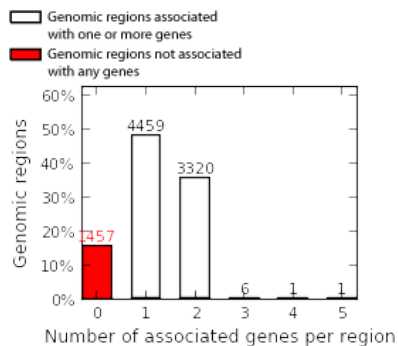

Binned by orientation and distance to TSS

[Download as PDF.](#)

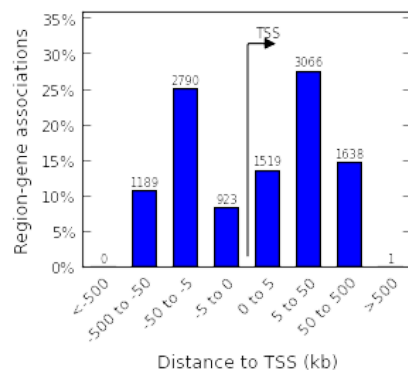

Binned by absolute distance to TSS

[Download as PDF.](#)

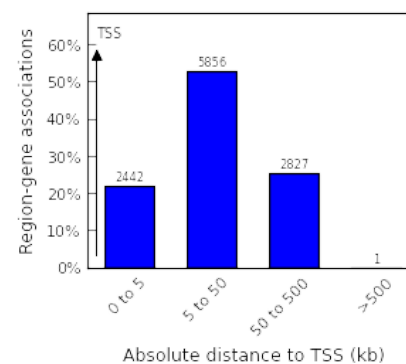

⊕ Global Controls

Global Export

Which data is exported by each option?

⊕ Ensembl Genes (no terms)

Global controls

⊖ GO Biological Process (20+ terms)

Global controls

Table controls:

Shown top rows in this table:

Term annotation count: Min:  Max:

Visualize this table:

| Term Name                                                  | Binom Rank | Binom Raw P-Value | Binom FDR Q-Val | Binom Fold Enrichment | Binom Observed Region Hits | Binom Region Set Coverage | Hyper Rank | Hyper FDR Q-Val | Hyper Fold Enrichment | Hyper Observed Gene Hits | Hyper Total Genes | Hyper Gene Set Coverage |
|------------------------------------------------------------|------------|-------------------|-----------------|-----------------------|----------------------------|---------------------------|------------|-----------------|-----------------------|--------------------------|-------------------|-------------------------|
| <a href="#">anion transport</a>                            | 229        | 1.2952e-32        | 7.4037e-31      | 2.0061                | 352                        | 3.81%                     | 160        | 4.0300e-8       | 1.3834                | 233                      | 470               | 3.04%                   |
| <a href="#">small molecule biosynthetic process</a>        | 313        | 1.7909e-23        | 7.4898e-22      | 2.0334                | 241                        | 2.61%                     | 394        | 2.1154e-4       | 1.3193                | 165                      | 349               | 2.15%                   |
| <a href="#">regulation of myeloid cell differentiation</a> | 354        | 5.7643e-21        | 2.1315e-19      | 2.2096                | 176                        | 1.90%                     | 262        | 1.2219e-5       | 1.4829                | 110                      | 207               | 1.43%                   |
| <a href="#">carboxylic acid transport</a>                  | 365        | 3.6501e-20        | 1.3090e-18      | 2.1414                | 181                        | 1.96%                     | 320        | 5.9435e-5       | 1.4330                | 114                      | 222               | 1.49%                   |
| <a href="#">organic acid transport</a>                     | 373        | 8.7233e-20        | 3.0613e-18      | 2.0884                | 188                        | 2.03%                     | 343        | 8.9741e-5       | 1.4132                | 118                      | 233               | 1.54%                   |
| <a href="#">neuromuscular process</a>                      | 398        | 2.9900e-18        | 9.8339e-17      | 2.3672                | 131                        | 1.42%                     | 237        | 3.1939e-6       | 1.6743                | 72                       | 120               | 0.94%                   |
| <a href="#">plasma membrane organization</a>               | 416        | 1.1338e-17        | 3.5676e-16      | 2.0258                | 179                        | 1.94%                     | 332        | 8.3201e-5       | 1.4268                | 113                      | 221               | 1.47%                   |
| <a href="#">developmental maturation</a>                   | 418        | 1.4534e-17        | 4.5513e-16      | 2.0294                | 177                        | 1.91%                     | 253        | 8.7497e-6       | 1.4700                | 118                      | 224               | 1.54%                   |
| <a href="#">anion transmembrane transport</a>              | 442        | 1.6416e-16        | 4.8615e-15      | 2.0515                | 161                        | 1.74%                     | 295        | 3.7937e-5       | 1.4548                | 110                      | 211               | 1.43%                   |
| <a href="#">regulation of innate immune response</a>       | 443        | 2.2220e-16        | 6.5657e-15      | 2.0290                | 164                        | 1.77%                     | 560        | 2.1729e-3       | 1.3316                | 115                      | 241               | 1.50%                   |
| <a href="#">monocarboxylic acid transport</a>              | 466        | 2.8150e-15        | 7.9073e-14      | 2.4322                | 102                        | 1.10%                     | 397        | 2.1997e-4       | 1.5946                | 60                       | 105               | 0.78%                   |

| Term Name                                                                        | Binom Rank | Binom Raw P-Value | Binom FDR Q-Val | Binom Fold Enrichment | Binom Observed Region Hits | Binom Region Set Coverage | Hyper Rank | Hyper FDR Q-Val | Hyper Fold Enrichment | Hyper Observed Gene Hits | Hyper Total Genes | Hyper Gene Set Coverage |
|----------------------------------------------------------------------------------|------------|-------------------|-----------------|-----------------------|----------------------------|---------------------------|------------|-----------------|-----------------------|--------------------------|-------------------|-------------------------|
| regulation of cysteine-type endopeptidase activity involved in apoptotic process | 468        | 2.8891e-15        | 8.0810e-14      | 2.0218                | 153                        | 1.66%                     | 622        | 4.1771e-3       | 1.3411                | 99                       | 206               | 1.29%                   |
| carboxylic acid biosynthetic process                                             | 474        | 3.3060e-15        | 9.1297e-14      | 2.0029                | 156                        | 1.69%                     | 674        | 5.8735e-3       | 1.3192                | 104                      | 220               | 1.36%                   |
| regulation of mitochondrion organization                                         | 491        | 9.9366e-15        | 2.6491e-13      | 2.0809                | 137                        | 1.48%                     | 988        | 3.0452e-2       | 1.2733                | 94                       | 206               | 1.23%                   |
| neurotransmitter transport                                                       | 492        | 1.5164e-14        | 4.0344e-13      | 2.2243                | 116                        | 1.25%                     | 317        | 5.5781e-5       | 1.5850                | 71                       | 125               | 0.93%                   |
| monocarboxylic acid biosynthetic process                                         | 512        | 4.0888e-14        | 1.0454e-12      | 2.2166                | 113                        | 1.22%                     | 701        | 6.7699e-3       | 1.3953                | 71                       | 142               | 0.93%                   |
| regulation of purine nucleotide biosynthetic process                             | 527        | 6.8593e-14        | 1.7038e-12      | 2.1645                | 117                        | 1.27%                     | 191        | 4.0532e-7       | 1.6958                | 79                       | 130               | 1.03%                   |
| regulation of cyclic nucleotide biosynthetic process                             | 528        | 6.9966e-14        | 1.7346e-12      | 2.1977                | 113                        | 1.22%                     | 211        | 7.1584e-7       | 1.7015                | 75                       | 123               | 0.98%                   |
| regulation of cyclic nucleotide metabolic process                                | 532        | 7.8414e-14        | 1.9294e-12      | 2.0922                | 126                        | 1.36%                     | 227        | 1.7020e-6       | 1.6278                | 84                       | 144               | 1.10%                   |
| neuromuscular process controlling balance                                        | 546        | 2.0705e-13        | 4.9639e-12      | 2.5961                | 78                         | 0.84%                     | 361        | 1.4241e-4       | 1.7758                | 42                       | 66                | 0.55%                   |

The test set of 9,244 genomic regions picked 7,667 (36%) of all 21,395 genes.  
 GO Biological Process has 13,090 terms covering 17,925 (84%) of all 21,395 genes, and 1,163,819 term - gene associations.  
 13,090 ontology terms (100%) were tested using an annotation count range of [1, Inf].

GO Cellular Component (20+ terms)

Global controls

Table controls:  Shown top rows in this table:   Term annotation count: Min:  Max:   Visualize this table:

| Term Name                                                  | Binom Rank | Binom Raw P-Value | Binom FDR Q-Val | Binom Fold Enrichment | Binom Observed Region Hits | Binom Region Set Coverage | Hyper Rank | Hyper FDR Q-Val | Hyper Fold Enrichment | Hyper Observed Gene Hits | Hyper Total Genes | Hyper Gene Set Coverage |
|------------------------------------------------------------|------------|-------------------|-----------------|-----------------------|----------------------------|---------------------------|------------|-----------------|-----------------------|--------------------------|-------------------|-------------------------|
| microtubule                                                | 78         | 9.2038e-27        | 1.9989e-25      | 2.0243                | 280                        | 3.03%                     | 78         | 1.9137e-4       | 1.2956                | 182                      | 392               | 2.37%                   |
| myelin sheath                                              | 87         | 3.9348e-21        | 7.6615e-20      | 2.3275                | 159                        | 1.72%                     | 111        | 5.1290e-3       | 1.3275                | 98                       | 206               | 1.28%                   |
| late endosome                                              | 106        | 7.9624e-18        | 1.2725e-16      | 2.1610                | 155                        | 1.68%                     | 69         | 9.7930e-5       | 1.4213                | 109                      | 214               | 1.42%                   |
| anchored component of membrane                             | 130        | 1.4745e-13        | 1.9215e-12      | 2.1155                | 120                        | 1.30%                     | 89         | 7.7627e-4       | 1.4297                | 83                       | 162               | 1.08%                   |
| synaptic vesicle                                           | 142        | 2.4720e-12        | 2.9490e-11      | 2.0585                | 115                        | 1.24%                     | 125        | 1.7660e-2       | 1.3402                | 73                       | 152               | 0.95%                   |
| transport vesicle membrane                                 | 149        | 1.8462e-11        | 2.0989e-10      | 2.0253                | 110                        | 1.19%                     | 146        | 3.6723e-2       | 1.3178                | 68                       | 144               | 0.89%                   |
| melanosome                                                 | 153        | 3.5290e-11        | 3.9072e-10      | 2.2346                | 85                         | 0.92%                     | 109        | 3.8660e-3       | 1.4742                | 56                       | 106               | 0.73%                   |
| extrinsic component of cytoplasmic side of plasma membrane | 158        | 1.2353e-10        | 1.3245e-9       | 2.1029                | 92                         | 1.00%                     | 110        | 4.8049e-3       | 1.4593                | 57                       | 109               | 0.74%                   |
| caveola                                                    | 171        | 1.3267e-9         | 1.3143e-8       | 2.1201                | 80                         | 0.87%                     | 62         | 2.8465e-5       | 1.7356                | 51                       | 82                | 0.67%                   |
| multivesicular body                                        | 173        | 1.6339e-9         | 1.5999e-8       | 3.1688                | 38                         | 0.41%                     | 101        | 1.3123e-3       | 1.9449                | 23                       | 33                | 0.30%                   |
| ruffle membrane                                            | 177        | 2.3035e-9         | 2.2046e-8       | 2.1911                | 72                         | 0.78%                     | 118        | 1.0271e-2       | 1.4974                | 44                       | 82                | 0.57%                   |

| Term Name                                        | Binom Rank | Binom Raw P-Value | Binom FDR Q-Val | Binom Fold Enrichment | Binom Observed Region Hits | Binom Region Set Coverage | Hyper Rank | Hyper FDR Q-Val | Hyper Fold Enrichment | Hyper Observed Gene Hits | Hyper Total Genes | Hyper Gene Set Coverage |
|--------------------------------------------------|------------|-------------------|-----------------|-----------------------|----------------------------|---------------------------|------------|-----------------|-----------------------|--------------------------|-------------------|-------------------------|
| presynaptic membrane                             | 185        | 7.5145e-9         | 6.8809e-8       | 2.1266                | 72                         | 0.78%                     | 119        | 1.0985e-2       | 1.5328                | 39                       | 71                | 0.51%                   |
| transcriptional repressor complex                | 186        | 1.1172e-8         | 1.0175e-7       | 2.0694                | 75                         | 0.81%                     | 114        | 5.8112e-3       | 1.5075                | 47                       | 87                | 0.61%                   |
| cytoplasmic microtubule                          | 187        | 1.2982e-8         | 1.1760e-7       | 2.5199                | 49                         | 0.53%                     | 150        | 4.6441e-2       | 1.4883                | 32                       | 60                | 0.42%                   |
| intrinsic component of synaptic vesicle membrane | 196        | 5.4874e-8         | 4.7427e-7       | 3.5866                | 26                         | 0.28%                     | 124        | 1.3260e-2       | 1.9932                | 15                       | 21                | 0.20%                   |
| sperm flagellum                                  | 207        | 1.8675e-7         | 1.5283e-6       | 2.0078                | 67                         | 0.72%                     | 148        | 4.0983e-2       | 1.3812                | 49                       | 99                | 0.64%                   |
| cortical actin cytoskeleton                      | 213        | 6.9926e-7         | 5.5613e-6       | 2.1207                | 53                         | 0.57%                     | 147        | 3.9482e-2       | 1.4825                | 34                       | 64                | 0.44%                   |
| integral component of synaptic vesicle membrane  | 230        | 4.4891e-6         | 3.3063e-5       | 3.6485                | 18                         | 0.19%                     | 128        | 1.8289e-2       | 2.1926                | 11                       | 14                | 0.14%                   |
| nuclear transcriptional repressor complex        | 232        | 5.3078e-6         | 3.8756e-5       | 2.5213                | 31                         | 0.34%                     | 133        | 2.4346e-2       | 1.7441                | 20                       | 32                | 0.26%                   |
| dendritic shaft                                  | 239        | 7.9700e-6         | 5.6491e-5       | 2.2601                | 37                         | 0.40%                     | 143        | 3.3915e-2       | 1.6592                | 22                       | 37                | 0.29%                   |

The test set of 9,244 genomic regions picked 7,667 (36%) of all 21,395 genes. GO Cellular Component has 1,694 terms covering 19,074 (89%) of all 21,395 genes, and 371,380 term - gene associations. 1,694 ontology terms (100%) were tested using an annotation count range of [1, Inf].

GO Molecular Function (20+ terms)

Global controls

Table controls:  Shown top rows in this table:   Term annotation count: Min:  Max:   Visualize this table:

| Term Name                                                                                                       | Binom Rank | Binom Raw P-Value | Binom FDR Q-Val | Binom Fold Enrichment | Binom Observed Region Hits | Binom Region Set Coverage | Hyper Rank | Hyper FDR Q-Val | Hyper Fold Enrichment | Hyper Observed Gene Hits | Hyper Total Genes | Hyper Gene Set Coverage |
|-----------------------------------------------------------------------------------------------------------------|------------|-------------------|-----------------|-----------------------|----------------------------|---------------------------|------------|-----------------|-----------------------|--------------------------|-------------------|-------------------------|
| core promoter proximal region sequence-specific DNA binding                                                     | 52         | 4.9084e-37        | 3.8993e-35      | 2.1038                | 358                        | 3.87%                     | 31         | 1.4803e-9       | 1.4538                | 211                      | 405               | 2.75%                   |
| core promoter proximal region DNA binding                                                                       | 53         | 4.3128e-36        | 3.3615e-34      | 2.0800                | 358                        | 3.87%                     | 35         | 3.1962e-9       | 1.4431                | 211                      | 408               | 2.75%                   |
| RNA polymerase II core promoter proximal region sequence-specific DNA binding                                   | 54         | 2.1988e-35        | 1.6820e-33      | 2.0948                | 345                        | 3.73%                     | 32         | 1.7918e-9       | 1.4593                | 205                      | 392               | 2.67%                   |
| transcription factor activity, RNA polymerase II core promoter proximal region sequence-specific binding        | 55         | 9.6292e-35        | 7.2324e-33      | 2.0165                | 371                        | 4.01%                     | 26         | 2.7054e-10      | 1.4611                | 222                      | 424               | 2.90%                   |
| transcriptional activator activity, RNA polymerase II transcription regulatory region sequence-specific binding | 56         | 2.3556e-34        | 1.7377e-32      | 2.0136                | 368                        | 3.98%                     | 6          | 3.2009e-14      | 1.5555                | 233                      | 418               | 3.04%                   |
| transcriptional activator activity, RNA polymerase II core promoter proximal region sequence-specific binding   | 66         | 3.6541e-28        | 2.2871e-26      | 2.1150                | 266                        | 2.88%                     | 28         | 5.8326e-10      | 1.5568                | 159                      | 285               | 2.07%                   |
| symporter activity                                                                                              | 104        | 1.2071e-15        | 4.7946e-14      | 2.2150                | 127                        | 1.37%                     | 75         | 3.0600e-4       | 1.4969                | 81                       | 151               | 1.06%                   |
| enhancer binding                                                                                                | 105        | 1.3214e-15        | 5.1987e-14      | 2.3911                | 108                        | 1.17%                     | 65         | 8.5003e-5       | 1.6195                | 65                       | 112               | 0.85%                   |

| Term Name                                                       | Binom Rank | Binom Raw P-Value | Binom FDR Q-Val | Binom Fold Enrichment | Binom Observed Region Hits | Binom Region Set Coverage | Hyper Rank | Hyper FDR Q-Val | Hyper Fold Enrichment | Hyper Observed Gene Hits | Hyper Total Genes | Hyper Gene Set Coverage |
|-----------------------------------------------------------------|------------|-------------------|-----------------|-----------------------|----------------------------|---------------------------|------------|-----------------|-----------------------|--------------------------|-------------------|-------------------------|
| enhancer sequence-specific DNA binding                          | 111        | 1.3775e-14        | 5.1265e-13      | 2.4176                | 98                         | 1.06%                     | 80         | 3.9578e-4       | 1.6025                | 58                       | 101               | 0.76%                   |
| RNA polymerase II distal enhancer sequence-specific DNA binding | 113        | 3.2125e-14        | 1.1744e-12      | 2.6962                | 78                         | 0.84%                     | 72         | 1.9033e-4       | 1.7172                | 48                       | 78                | 0.63%                   |
| lyase activity                                                  | 115        | 2.1315e-13        | 7.6568e-12      | 2.0544                | 127                        | 1.37%                     | 135        | 2.5300e-2       | 1.3311                | 83                       | 174               | 1.08%                   |
| channel regulator activity                                      | 116        | 2.8420e-13        | 1.0121e-11      | 2.2204                | 105                        | 1.14%                     | 53         | 2.7978e-5       | 1.6203                | 72                       | 124               | 0.94%                   |
| carboxylic acid transmembrane transporter activity              | 118        | 3.8298e-13        | 1.3408e-11      | 2.1904                | 107                        | 1.16%                     | 104        | 2.9760e-3       | 1.4734                | 66                       | 125               | 0.86%                   |
| organic acid transmembrane transporter activity                 | 119        | 1.2745e-12        | 4.4242e-11      | 2.0887                | 114                        | 1.23%                     | 112        | 6.4481e-3       | 1.4258                | 70                       | 137               | 0.91%                   |
| solute:cation symporter activity                                | 127        | 4.0499e-11        | 1.3173e-9       | 2.2529                | 83                         | 0.90%                     | 88         | 8.1264e-4       | 1.5714                | 58                       | 103               | 0.76%                   |
| phosphatidylserine binding                                      | 129        | 6.9842e-11        | 2.2366e-9       | 2.7958                | 54                         | 0.58%                     | 77         | 3.0693e-4       | 1.9738                | 29                       | 41                | 0.38%                   |
| monocarboxylic acid transmembrane transporter activity          | 130        | 8.2294e-11        | 2.6151e-9       | 2.9970                | 48                         | 0.52%                     | 157        | 4.1274e-2       | 1.6743                | 24                       | 40                | 0.31%                   |
| SNARE binding                                                   | 131        | 8.4224e-11        | 2.6560e-9       | 2.1499                | 89                         | 0.96%                     | 131        | 2.3909e-2       | 1.4202                | 57                       | 112               | 0.74%                   |
| ion channel regulator activity                                  | 132        | 1.1073e-10        | 3.4653e-9       | 2.2691                | 78                         | 0.84%                     | 46         | 1.6575e-5       | 1.7728                | 54                       | 85                | 0.70%                   |
| dioxygenase activity                                            | 138        | 7.1353e-10        | 2.1359e-8       | 2.2410                | 73                         | 0.79%                     | 137        | 2.5188e-2       | 1.4755                | 46                       | 87                | 0.60%                   |

The test set of 9,244 genomic regions picked 7,667 (36%) of all 21,395 genes. GO Molecular Function has 4,131 terms covering 17,189 (80%) of all 21,395 genes, and 227,341 term - gene associations. 4,131 ontology terms (100%) were tested using an annotation count range of [1, Inf].

Human Phenotype (5 terms)

Global controls

Table controls:  Shown top rows in this table:   Term annotation count: Min:  Max:   Visualize this table:

| Term Name                                | Binom Rank | Binom Raw P-Value | Binom FDR Q-Val | Binom Fold Enrichment | Binom Observed Region Hits | Binom Region Set Coverage | Hyper Rank | Hyper FDR Q-Val | Hyper Fold Enrichment | Hyper Observed Gene Hits | Hyper Total Genes | Hyper Gene Set Coverage |
|------------------------------------------|------------|-------------------|-----------------|-----------------------|----------------------------|---------------------------|------------|-----------------|-----------------------|--------------------------|-------------------|-------------------------|
| Abnormal larynx morphology               | 232        | 1.8204e-8         | 5.1779e-7       | 2.3278                | 56                         | 0.61%                     | 24         | 3.5371e-2       | 1.6943                | 34                       | 56                | 0.44%                   |
| Hypotelorism                             | 276        | 1.7403e-7         | 4.1610e-6       | 2.3543                | 47                         | 0.51%                     | 8          | 8.7007e-3       | 1.9827                | 27                       | 38                | 0.35%                   |
| Abnormality of the phalanges of the toes | 301        | 4.3211e-7         | 9.4733e-6       | 2.4072                | 42                         | 0.45%                     | 25         | 4.2184e-2       | 1.8877                | 23                       | 34                | 0.30%                   |
| Adrenal overactivity                     | 397        | 7.5549e-6         | 1.2558e-4       | 2.8703                | 24                         | 0.26%                     | 17         | 3.4348e-2       | 2.1563                | 17                       | 22                | 0.22%                   |
| Abnormality of the gingiva               | 404        | 8.5219e-6         | 1.3920e-4       | 2.0307                | 47                         | 0.51%                     | 31         | 4.7144e-2       | 1.6743                | 33                       | 55                | 0.43%                   |

The test set of 9,244 genomic regions picked 7,667 (36%) of all 21,395 genes. Human Phenotype has 6,599 terms covering 3,215 (15%) of all 21,395 genes, and 244,972 term - gene associations. 6,599 ontology terms (100%) were tested using an annotation count range of [1, Inf].

Mouse Phenotype Single KO (20+ terms)

Global controls

Table controls: Export Showed top rows in this table: 20 Set Term annotation count: Min: 1 Max: Inf Set Visualize this table: [select one]

| Term Name                                                     | Binom Rank | Binom Raw P-Value | Binom FDR Q-Val | Binom Fold Enrichment | Binom Observed Region Hits | Binom Region Set Coverage | Hyper Rank | Hyper FDR Q-Val | Hyper Fold Enrichment | Hyper Observed Gene Hits | Hyper Total Genes | Hyper Gene Set Coverage |
|---------------------------------------------------------------|------------|-------------------|-----------------|-----------------------|----------------------------|---------------------------|------------|-----------------|-----------------------|--------------------------|-------------------|-------------------------|
| abnormal digestive system physiology                          | 107        | 2.2104e-34        | 1.8943e-32      | 2.0210                | 365                        | 3.95%                     | 93         | 8.9588e-11      | 1.4391                | 246                      | 477               | 3.21%                   |
| abnormal immunoglobulin level                                 | 116        | 7.9157e-32        | 6.2575e-30      | 2.0333                | 332                        | 3.59%                     | 165        | 2.0060e-7       | 1.3733                | 219                      | 445               | 2.86%                   |
| decreased inflammatory response                               | 127        | 1.0075e-30        | 7.2743e-29      | 2.4935                | 207                        | 2.24%                     | 150        | 3.8586e-8       | 1.5412                | 132                      | 239               | 1.72%                   |
| abnormal acute inflammation                                   | 132        | 3.8851e-29        | 2.6989e-27      | 2.3170                | 226                        | 2.44%                     | 243        | 1.2453e-5       | 1.4051                | 143                      | 284               | 1.87%                   |
| abnormal blood vessel physiology                              | 147        | 1.8589e-27        | 1.1596e-25      | 2.0497                | 279                        | 3.02%                     | 68         | 1.4713e-12      | 1.5776                | 186                      | 329               | 2.43%                   |
| abnormal circulating triglyceride level                       | 180        | 9.2423e-25        | 4.7085e-23      | 2.0468                | 251                        | 2.72%                     | 407        | 3.5120e-4       | 1.3117                | 157                      | 334               | 2.05%                   |
| abnormal macrophage physiology                                | 181        | 1.0048e-24        | 5.0905e-23      | 2.0134                | 261                        | 2.82%                     | 269        | 2.0663e-5       | 1.3520                | 172                      | 355               | 2.24%                   |
| increased or absent threshold for auditory brainstem response | 187        | 2.5743e-24        | 1.2624e-22      | 2.0341                | 250                        | 2.70%                     | 196        | 1.0159e-6       | 1.4322                | 155                      | 302               | 2.02%                   |
| decreased immunoglobulin level                                | 220        | 1.0762e-20        | 4.4858e-19      | 2.0598                | 204                        | 2.21%                     | 343        | 1.0641e-4       | 1.3699                | 135                      | 275               | 1.76%                   |
| decreased triglyceride level                                  | 233        | 6.3001e-20        | 2.4795e-18      | 2.0723                | 193                        | 2.09%                     | 528        | 1.3380e-3       | 1.3247                | 122                      | 257               | 1.59%                   |
| abnormal posture                                              | 241        | 1.6437e-19        | 6.2541e-18      | 2.0752                | 188                        | 2.03%                     | 149        | 3.7568e-8       | 1.5849                | 117                      | 206               | 1.53%                   |
| abnormal mean corpuscular volume                              | 251        | 7.4184e-19        | 2.7102e-17      | 2.1600                | 165                        | 1.78%                     | 1,155      | 3.9467e-2       | 1.2446                | 95                       | 213               | 1.24%                   |
| decreased acute inflammation                                  | 253        | 8.0677e-19        | 2.9241e-17      | 2.3984                | 132                        | 1.43%                     | 306        | 5.1056e-5       | 1.5079                | 87                       | 161               | 1.13%                   |
| decreased circulating triglyceride level                      | 282        | 1.3822e-17        | 4.4947e-16      | 2.1530                | 154                        | 1.67%                     | 757        | 9.8754e-3       | 1.3059                | 95                       | 203               | 1.24%                   |
| abnormal granulocyte physiology                               | 306        | 2.5652e-16        | 7.6872e-15      | 2.0618                | 157                        | 1.70%                     | 897        | 1.7165e-2       | 1.2707                | 102                      | 224               | 1.33%                   |
| abnormal fat cell morphology                                  | 328        | 1.4205e-15        | 3.9715e-14      | 2.0738                | 147                        | 1.59%                     | 504        | 1.0829e-3       | 1.4032                | 88                       | 175               | 1.15%                   |
| improved glucose tolerance                                    | 332        | 2.4675e-15        | 6.8153e-14      | 2.0002                | 158                        | 1.71%                     | 446        | 5.4012e-4       | 1.3953                | 100                      | 200               | 1.30%                   |
| abnormal hypersensitivity reaction                            | 335        | 3.7505e-15        | 1.0266e-13      | 2.2631                | 117                        | 1.27%                     | 636        | 3.9223e-3       | 1.3863                | 77                       | 155               | 1.00%                   |
| abnormal intestine physiology                                 | 349        | 1.6798e-14        | 4.4137e-13      | 2.0188                | 145                        | 1.57%                     | 632        | 3.9266e-3       | 1.3340                | 98                       | 205               | 1.28%                   |
| abnormal IgG1 level                                           | 354        | 2.8096e-14        | 7.2780e-13      | 2.0160                | 143                        | 1.55%                     | 405        | 3.4490e-4       | 1.4256                | 94                       | 184               | 1.23%                   |

The test set of 9,244 genomic regions picked 7,667 (36%) of all 21,395 genes. *Mouse Phenotype Single KO* has 9,170 terms covering 9,466 (44%) of all 21,395 genes, and 551,620 term - gene associations. 9,170 ontology terms (100%) were tested using an annotation count range of [1, Inf].

Mouse Phenotype (20+ terms)

Global controls

Table controls: Export Showed top rows in this table: 20 Set Term annotation count: Min: 1 Max: Inf Set Visualize this table: [select one]

| Term Name                   | Binom Rank | Binom Raw P-Value | Binom FDR Q-Val | Binom Fold Enrichment | Binom Observed Region Hits | Binom Region Set Coverage | Hyper Rank | Hyper FDR Q-Val | Hyper Fold Enrichment | Hyper Observed Gene Hits | Hyper Total Genes | Hyper Gene Set Coverage |
|-----------------------------|------------|-------------------|-----------------|-----------------------|----------------------------|---------------------------|------------|-----------------|-----------------------|--------------------------|-------------------|-------------------------|
| abnormal acute inflammation | 144        | 1.1868e-33        | 7.8912e-32      | 2.3075                | 265                        | 2.87%                     | 317        | 5.9274e-6       | 1.3787                | 166                      | 336               | 2.17%                   |

| Term Name                                                     | Binom Rank | Binom Raw P-Value | Binom FDR Q-Val   | Binom Fold Enrichment | Binom Observed Region Hits | Binom Region Set Coverage | Hyper Rank | Hyper FDR Q-Val   | Hyper Fold Enrichment | Hyper Observed Gene Hits | Hyper Total Genes | Hyper Gene Set Coverage |
|---------------------------------------------------------------|------------|-------------------|-------------------|-----------------------|----------------------------|---------------------------|------------|-------------------|-----------------------|--------------------------|-------------------|-------------------------|
| abnormal blood vessel physiology                              | 153        | <b>6.6757e-33</b> | <b>4.1778e-31</b> | 2.0089                | 354                        | 3.83%                     | 67         | <b>9.7026e-15</b> | 1.5518                | 233                      | 419               | 3.04%                   |
| decreased inflammatory response                               | 168        | <b>1.5602e-30</b> | <b>8.8920e-29</b> | 2.3285                | 235                        | 2.54%                     | 275        | <b>2.0710e-6</b>  | 1.4237                | 150                      | 294               | 1.96%                   |
| increased or absent threshold for auditory brainstem response | 219        | <b>1.3326e-25</b> | <b>5.8262e-24</b> | 2.0342                | 264                        | 2.86%                     | 227        | <b>3.1030e-7</b>  | 1.4346                | 164                      | 319               | 2.14%                   |
| decreased immunoglobulin level                                | 240        | <b>3.0786e-24</b> | <b>1.2282e-22</b> | 2.0247                | 252                        | 2.73%                     | 356        | <b>2.2054e-5</b>  | 1.3545                | 166                      | 342               | 2.17%                   |
| abnormal posture                                              | 257        | <b>1.4785e-22</b> | <b>5.5082e-21</b> | 2.0023                | 240                        | 2.60%                     | 196        | <b>9.3041e-8</b>  | 1.4856                | 148                      | 278               | 1.93%                   |
| abnormal granulocyte physiology                               | 288        | <b>2.1786e-20</b> | <b>7.2432e-19</b> | 2.1127                | 189                        | 2.04%                     | 875        | <b>5.9085e-3</b>  | 1.2751                | 122                      | 267               | 1.59%                   |
| decreased acute inflammation                                  | 298        | <b>3.1341e-20</b> | <b>1.0070e-18</b> | 2.3031                | 155                        | 1.68%                     | 534        | <b>3.9624e-4</b>  | 1.4023                | 99                       | 197               | 1.29%                   |
| abnormal mean corpuscular volume                              | 307        | <b>2.5567e-19</b> | <b>7.9740e-18</b> | 2.0798                | 185                        | 2.00%                     | 1,162      | <b>1.6868e-2</b>  | 1.2529                | 110                      | 245               | 1.43%                   |
| increased acute inflammation                                  | 349        | <b>2.0853e-17</b> | <b>5.7211e-16</b> | 2.3706                | 124                        | 1.34%                     | 1,001      | <b>9.9203e-3</b>  | 1.3491                | 73                       | 151               | 0.95%                   |
| decreased circulating triglyceride level                      | 351        | <b>2.3441e-17</b> | <b>6.3944e-16</b> | 2.0375                | 173                        | 1.87%                     | 996        | <b>9.8828e-3</b>  | 1.2737                | 110                      | 241               | 1.43%                   |
| decreased susceptibility to weight gain                       | 365        | <b>7.5067e-17</b> | <b>1.9692e-15</b> | 2.2292                | 136                        | 1.47%                     | 293        | <b>3.0090e-6</b>  | 1.5893                | 86                       | 151               | 1.12%                   |
| decreased circulating HDL cholesterol level                   | 384        | <b>4.1991e-16</b> | <b>1.0470e-14</b> | 2.2161                | 131                        | 1.42%                     | 647        | <b>1.2563e-3</b>  | 1.4226                | 78                       | 153               | 1.02%                   |
| abnormal hypersensitivity reaction                            | 391        | <b>4.9521e-16</b> | <b>1.2127e-14</b> | 2.2189                | 130                        | 1.41%                     | 844        | <b>5.0132e-3</b>  | 1.3477                | 85                       | 176               | 1.11%                   |
| increased susceptibility to injury                            | 418        | <b>4.7656e-15</b> | <b>1.0916e-13</b> | 2.1357                | 132                        | 1.43%                     | 355        | <b>2.1759e-5</b>  | 1.5441                | 83                       | 150               | 1.08%                   |
| increased energy expenditure                                  | 429        | <b>1.5809e-14</b> | <b>3.5284e-13</b> | 2.0676                | 137                        | 1.48%                     | 308        | <b>4.7149e-6</b>  | 1.5599                | 90                       | 161               | 1.17%                   |
| paralysis                                                     | 431        | <b>1.7537e-14</b> | <b>3.8960e-13</b> | 2.1105                | 130                        | 1.41%                     | 927        | <b>7.7386e-3</b>  | 1.3585                | 74                       | 152               | 0.97%                   |
| decreased susceptibility to diet-induced obesity              | 456        | <b>5.8854e-14</b> | <b>1.2358e-12</b> | 2.2038                | 113                        | 1.22%                     | 447        | <b>1.0074e-4</b>  | 1.5503                | 70                       | 126               | 0.91%                   |
| abnormal interleukin-6 secretion                              | 464        | <b>1.1591e-13</b> | <b>2.3919e-12</b> | 2.0470                | 131                        | 1.42%                     | 799        | <b>3.6968e-3</b>  | 1.3498                | 89                       | 184               | 1.16%                   |
| cardiomyopathy                                                | 479        | <b>1.8721e-13</b> | <b>3.7422e-12</b> | 2.0203                | 133                        | 1.44%                     | 298        | <b>3.3072e-6</b>  | 1.5697                | 90                       | 160               | 1.17%                   |

The test set of 9,244 genomic regions picked 7,667 (36%) of all 21,395 genes.  
*Mouse Phenotype* has 9,575 terms covering 9,654 (45%) of all 21,395 genes, and 705,265 term - gene associations.  
 9,575 ontology terms (100%) were tested using an annotation count range of [1, Inf].
