# Supplementary material for: AP-2α and AP-2β cooperatively function in the craniofacial surface ectoderm to regulate chromatin and gene expression dynamics during facial development
Source: eLife journal article supplement (doi:10.7554/elife.70511), 2022-03-25
Supplement: supp [file elife-70511-supp-v1.zip]

⊕ Job Description

⊕ Region-Gene Association Graphs

What do these graphs illustrate?

Number of associated genes per region

[Download as PDF.](#)

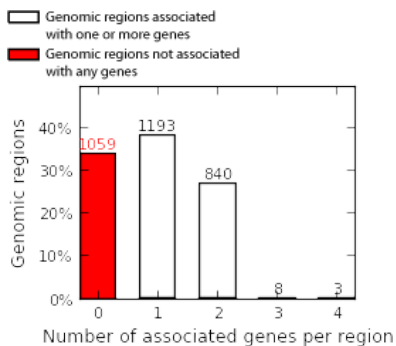

Binned by orientation and distance to TSS

[Download as PDF.](#)

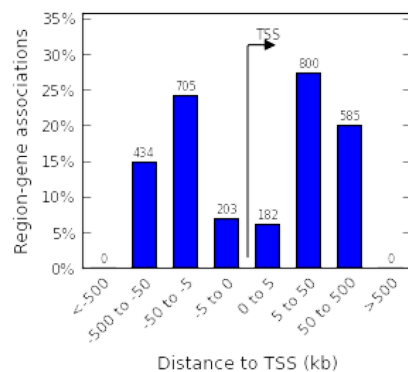

Binned by absolute distance to TSS

[Download as PDF.](#)

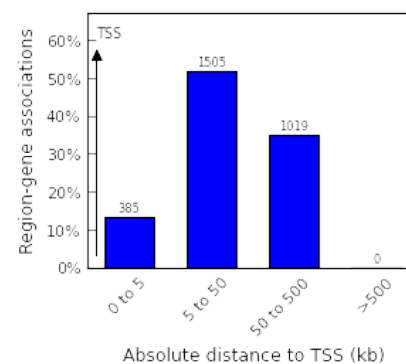

⊕ Global Controls

Global Export

Which data is exported by each option?

⊕ Ensembl Genes (no terms)

Global controls

⊖ GO Biological Process (20+ terms)

Global controls

Table controls:

Shown top rows in this table:

Term annotation count: Min:  Max:

Visualize this table:

| Term Name                                                      | Binom Rank | Binom Raw P-Value | Binom FDR Q-Val | Binom Fold Enrichment | Binom Observed Region Hits | Binom Region Set Coverage | Hyper Rank | Hyper FDR Q-Val | Hyper Fold Enrichment | Hyper Observed Gene Hits | Hyper Total Genes | Hyper Gene Set Coverage |
|----------------------------------------------------------------|------------|-------------------|-----------------|-----------------------|----------------------------|---------------------------|------------|-----------------|-----------------------|--------------------------|-------------------|-------------------------|
| <a href="#">pattern specification process</a>                  | 23         | 2.2839e-32        | 1.2998e-29      | 2.7903                | 176                        | 5.67%                     | 48         | 9.5937e-11      | 2.1198                | 98                       | 440               | 4.36%                   |
| <a href="#">regulation of protein binding</a>                  | 31         | 3.9155e-30        | 1.6534e-27      | 3.9113                | 103                        | 3.32%                     | 371        | 1.3204e-3       | 1.9227                | 40                       | 198               | 1.78%                   |
| <a href="#">regulation of binding</a>                          | 45         | 7.0139e-27        | 2.0403e-24      | 2.9083                | 136                        | 4.38%                     | 261        | 7.2776e-5       | 1.8050                | 66                       | 348               | 2.94%                   |
| <a href="#">central nervous system development</a>             | 47         | 2.9169e-26        | 8.1238e-24      | 2.0008                | 272                        | 8.77%                     | 128        | 8.0532e-8       | 1.6138                | 156                      | 920               | 6.94%                   |
| <a href="#">brain development</a>                              | 53         | 2.8999e-25        | 7.1622e-23      | 2.1025                | 233                        | 7.51%                     | 192        | 4.4645e-6       | 1.6035                | 124                      | 736               | 5.52%                   |
| <a href="#">head development</a>                               | 64         | 1.0367e-23        | 2.1204e-21      | 2.0254                | 238                        | 7.67%                     | 205        | 7.2470e-6       | 1.5720                | 129                      | 781               | 5.74%                   |
| <a href="#">Ras protein signal transduction</a>                | 66         | 2.0442e-23        | 4.0543e-21      | 4.1349                | 74                         | 2.38%                     | 750        | 3.9994e-2       | 1.8163                | 25                       | 131               | 1.11%                   |
| <a href="#">small GTPase mediated signal transduction</a>      | 113        | 3.4680e-18        | 4.0174e-16      | 2.8415                | 93                         | 3.00%                     | 681        | 2.8701e-2       | 1.5989                | 42                       | 250               | 1.87%                   |
| <a href="#">positive regulation of intracellular transport</a> | 134        | 8.6727e-17        | 8.4720e-15      | 2.5838                | 100                        | 3.22%                     | 585        | 1.6448e-2       | 1.5810                | 50                       | 301               | 2.22%                   |
| <a href="#">regulation of cell morphogenesis</a>               | 140        | 1.7814e-16        | 1.6656e-14      | 2.1938                | 135                        | 4.35%                     | 417        | 2.6842e-3       | 1.5678                | 71                       | 431               | 3.16%                   |
| <a href="#">gland development</a>                              | 141        | 1.8120e-16        | 1.6822e-14      | 2.1111                | 147                        | 4.74%                     | 113        | 2.4797e-8       | 1.9364                | 94                       | 462               | 4.18%                   |

| Term Name                                                   | Binom Rank | Binom Raw P-Value | Binom FDR Q-Val   | Binom Fold Enrichment | Binom Observed Region Hits | Binom Region Set Coverage | Hyper Rank | Hyper FDR Q-Val  | Hyper Fold Enrichment | Hyper Observed Gene Hits | Hyper Total Genes | Hyper Gene Set Coverage |
|-------------------------------------------------------------|------------|-------------------|-------------------|-----------------------|----------------------------|---------------------------|------------|------------------|-----------------------|--------------------------|-------------------|-------------------------|
| <a href="#">defense response to virus</a>                   | 147        | <b>9.4252e-16</b> | <b>8.3929e-14</b> | 3.6380                | 56                         | 1.80%                     | 504        | <b>8.7262e-3</b> | 1.8203                | 35                       | 183               | 1.56%                   |
| <a href="#">metencephalon development</a>                   | 151        | <b>3.3094e-15</b> | <b>2.8689e-13</b> | 3.3490                | 60                         | 1.93%                     | 782        | <b>4.7604e-2</b> | 1.8128                | 24                       | 126               | 1.07%                   |
| <a href="#">regulation of cellular protein localization</a> | 156        | <b>4.2193e-15</b> | <b>3.5405e-13</b> | 2.0339                | 146                        | 4.71%                     | 495        | <b>7.2730e-3</b> | 1.4450                | 87                       | 573               | 3.87%                   |
| <a href="#">actin cytoskeleton organization</a>             | 163        | <b>6.6548e-15</b> | <b>5.3443e-13</b> | 2.1692                | 124                        | 4.00%                     | 589        | <b>1.7238e-2</b> | 1.4835                | 65                       | 417               | 2.89%                   |
| <a href="#">protein heterotetramerization</a>               | 166        | <b>7.3753e-15</b> | <b>5.8158e-13</b> | 7.9822                | 25                         | 0.81%                     | 155        | <b>4.9257e-7</b> | 4.2299                | 20                       | 45                | 0.89%                   |
| <a href="#">hindbrain development</a>                       | 178        | <b>1.8311e-14</b> | <b>1.3466e-12</b> | 2.8239                | 73                         | 2.35%                     | 443        | <b>4.4376e-3</b> | 1.9147                | 34                       | 169               | 1.51%                   |
| <a href="#">muscle structure development</a>                | 188        | <b>5.3888e-14</b> | <b>3.7521e-12</b> | 2.0113                | 138                        | 4.45%                     | 127        | <b>8.0596e-8</b> | 1.8914                | 94                       | 473               | 4.18%                   |
| <a href="#">response to virus</a>                           | 189        | <b>5.5440e-14</b> | <b>3.8397e-12</b> | 2.8832                | 68                         | 2.19%                     | 451        | <b>4.8427e-3</b> | 1.7236                | 46                       | 254               | 2.05%                   |
| <a href="#">adult walking behavior</a>                      | 190        | <b>5.6152e-14</b> | <b>3.8686e-12</b> | 5.2353                | 33                         | 1.06%                     | 588        | <b>1.6819e-2</b> | 2.7856                | 12                       | 41                | 0.53%                   |

The test set of 3,103 genomic regions picked 2,248 (11%) of all 21,395 genes.  
 GO Biological Process has 13,090 terms covering 17,925 (84%) of all 21,395 genes, and 1,163,819 term - gene associations.  
 13,090 ontology terms (100%) were tested using an annotation count range of [1, Inf].

GO Cellular Component (8 terms)

Global controls

Table controls:  Shown top rows in this table:   Term annotation count: Min:  Max:   Visualize this table:

| Term Name                                   | Binom Rank | Binom Raw P-Value | Binom FDR Q-Val   | Binom Fold Enrichment | Binom Observed Region Hits | Binom Region Set Coverage | Hyper Rank | Hyper FDR Q-Val  | Hyper Fold Enrichment | Hyper Observed Gene Hits | Hyper Total Genes | Hyper Gene Set Coverage |
|---------------------------------------------|------------|-------------------|-------------------|-----------------------|----------------------------|---------------------------|------------|------------------|-----------------------|--------------------------|-------------------|-------------------------|
| <a href="#">anchoring junction</a>          | 23         | <b>1.2121e-18</b> | <b>8.9277e-17</b> | 2.2088                | 152                        | 4.90%                     | 27         | <b>5.7414e-4</b> | 1.5862                | 87                       | 522               | 3.87%                   |
| <a href="#">adherens junction</a>           | 24         | <b>1.2430e-17</b> | <b>8.7734e-16</b> | 2.1888                | 146                        | 4.71%                     | 31         | <b>3.4431e-3</b> | 1.5326                | 81                       | 503               | 3.60%                   |
| <a href="#">endoplasmic reticulum lumen</a> | 50         | <b>5.4844e-11</b> | <b>1.8581e-9</b>  | 3.3789                | 41                         | 1.32%                     | 33         | <b>5.7393e-3</b> | 2.2031                | 25                       | 108               | 1.11%                   |
| <a href="#">nuclear nucleosome</a>          | 56         | <b>3.6967e-10</b> | <b>1.1182e-8</b>  | 7.4791                | 17                         | 0.55%                     | 48         | <b>2.6663e-2</b> | 2.7856                | 12                       | 41                | 0.53%                   |
| <a href="#">nucleosome</a>                  | 69         | <b>1.0227e-6</b>  | <b>2.5109e-5</b>  | 3.4468                | 22                         | 0.71%                     | 9          | <b>5.3360e-6</b> | 2.7423                | 34                       | 118               | 1.51%                   |
| <a href="#">cell-cell adherens junction</a> | 70         | <b>1.0369e-6</b>  | <b>2.5093e-5</b>  | 2.4733                | 37                         | 1.19%                     | 15         | <b>6.3112e-5</b> | 2.7192                | 28                       | 98                | 1.25%                   |
| <a href="#">DNA packaging complex</a>       | 72         | <b>7.2118e-6</b>  | <b>1.6968e-4</b>  | 3.0419                | 22                         | 0.71%                     | 11         | <b>2.5357e-5</b> | 2.5682                | 34                       | 126               | 1.51%                   |
| <a href="#">basement membrane</a>           | 86         | <b>1.3524e-4</b>  | <b>2.6640e-3</b>  | 2.1080                | 31                         | 1.00%                     | 26         | <b>5.8999e-4</b> | 2.5312                | 25                       | 94                | 1.11%                   |

The test set of 3,103 genomic regions picked 2,248 (11%) of all 21,395 genes.  
 GO Cellular Component has 1,694 terms covering 19,074 (89%) of all 21,395 genes, and 371,380 term - gene associations.  
 1,694 ontology terms (100%) were tested using an annotation count range of [1, Inf].

GO Molecular Function (4 terms)

Global controls

Table controls:  Shown top rows in this table:   Term annotation count: Min:  Max:   Visualize this table:

| Term Name                                          | Binom Rank | Binom Raw P-Value | Binom FDR Q-Val   | Binom Fold Enrichment | Binom Observed Region Hits | Binom Region Set Coverage | Hyper Rank | Hyper FDR Q-Val  | Hyper Fold Enrichment | Hyper Observed Gene Hits | Hyper Total Genes | Hyper Gene Set Coverage |
|----------------------------------------------------|------------|-------------------|-------------------|-----------------------|----------------------------|---------------------------|------------|------------------|-----------------------|--------------------------|-------------------|-------------------------|
| <a href="#">type I interferon receptor binding</a> | 13         | <b>3.3247e-15</b> | <b>1.0565e-12</b> | 20.5527               | 15                         | 0.48%                     | 11         | <b>3.3779e-4</b> | 4.2982                | 14                       | 31                | 0.62%                   |
| <a href="#">frizzled binding</a>                   | 48         | <b>1.6529e-7</b>  | <b>1.4225e-5</b>  | 3.8536                | 22                         | 0.71%                     | 14         | <b>4.7547e-3</b> | 3.5064                | 14                       | 38                | 0.62%                   |
| <a href="#">S100 protein binding</a>               | 86         | <b>6.5131e-5</b>  | <b>3.1286e-3</b>  | 5.3566                | 9                          | 0.29%                     | 22         | <b>2.5432e-2</b> | 5.1247                | 7                        | 13                | 0.31%                   |
| <a href="#">beta-catenin binding</a>               | 88         | <b>7.6381e-5</b>  | <b>3.5856e-3</b>  | 2.2841                | 28                         | 0.90%                     | 18         | <b>1.3020e-2</b> | 2.4983                | 21                       | 80                | 0.93%                   |

The test set of 3,103 genomic regions picked 2,248 (11%) of all 21,395 genes.  
 GO Molecular Function has 4,131 terms covering 17,189 (80%) of all 21,395 genes, and 227,341 term - gene associations.  
 4,131 ontology terms (100%) were tested using an annotation count range of [1, Inf].

Human Phenotype (20+ terms)

Global controls

Table controls:  Shown top rows in this table:   Term annotation count: Min:  Max:   Visualize this table:

| Term Name                                                | Binom Rank | Binom Raw P-Value | Binom FDR Q-Val   | Binom Fold Enrichment | Binom Observed Region Hits | Binom Region Set Coverage | Hyper Rank | Hyper FDR Q-Val  | Hyper Fold Enrichment | Hyper Observed Gene Hits | Hyper Total Genes | Hyper Gene Set Coverage |
|----------------------------------------------------------|------------|-------------------|-------------------|-----------------------|----------------------------|---------------------------|------------|------------------|-----------------------|--------------------------|-------------------|-------------------------|
| <a href="#">Functional abnormality of the middle ear</a> | 17         | <b>1.1778e-33</b> | <b>4.5718e-31</b> | 6.1359                | 74                         | 2.38%                     | 97         | <b>4.0674e-2</b> | 2.2325                | 19                       | 81                | 0.85%                   |
| <a href="#">Limited elbow movement</a>                   | 46         | <b>4.9100e-11</b> | <b>7.0437e-9</b>  | 4.0397                | 33                         | 1.06%                     | 69         | <b>2.8787e-2</b> | 2.4128                | 18                       | 71                | 0.80%                   |
| <a href="#">Sparse hair</a>                              | 52         | <b>1.4130e-10</b> | <b>1.7932e-8</b>  | 2.8990                | 49                         | 1.58%                     | 13         | <b>3.9849e-3</b> | 2.2560                | 32                       | 135               | 1.42%                   |
| <a href="#">Abnormality of hair density</a>              | 54         | <b>3.3501e-10</b> | <b>4.0939e-8</b>  | 2.8231                | 49                         | 1.58%                     | 19         | <b>5.1740e-3</b> | 2.1910                | 32                       | 139               | 1.42%                   |
| <a href="#">Cleft lip</a>                                | 59         | <b>1.2060e-9</b>  | <b>1.3489e-7</b>  | 2.8569                | 45                         | 1.45%                     | 1          | <b>1.2962e-3</b> | 2.7879                | 29                       | 99                | 1.29%                   |
| <a href="#">Limitation of joint mobility</a>             | 63         | <b>5.3272e-9</b>  | <b>5.5800e-7</b>  | 2.8759                | 41                         | 1.32%                     | 74         | <b>3.2566e-2</b> | 2.0512                | 25                       | 116               | 1.11%                   |
| <a href="#">Aplasia/Hypoplasia of the eyebrow</a>        | 65         | <b>9.6810e-9</b>  | <b>9.8285e-7</b>  | 3.4023                | 31                         | 1.00%                     | 45         | <b>1.7114e-2</b> | 2.5115                | 19                       | 72                | 0.85%                   |
| <a href="#">Syndactyly</a>                               | 66         | <b>1.1190e-8</b>  | <b>1.1189e-6</b>  | 2.5244                | 49                         | 1.58%                     | 17         | <b>4.2162e-3</b> | 2.2230                | 32                       | 137               | 1.42%                   |
| <a href="#">Regional abnormality of skin</a>             | 69         | <b>1.5129e-8</b>  | <b>1.4469e-6</b>  | 2.4994                | 49                         | 1.58%                     | 47         | <b>1.6571e-2</b> | 2.0071                | 31                       | 147               | 1.38%                   |
| <a href="#">Cleft upper lip</a>                          | 73         | <b>2.1284e-8</b>  | <b>1.9240e-6</b>  | 2.7322                | 41                         | 1.32%                     | 7          | <b>2.0747e-3</b> | 2.6608                | 26                       | 93                | 1.16%                   |
| <a href="#">Cleft palate</a>                             | 75         | <b>2.2795e-8</b>  | <b>2.0056e-6</b>  | 2.1505                | 65                         | 2.09%                     | 10         | <b>4.1233e-3</b> | 1.9736                | 45                       | 217               | 2.00%                   |
| <a href="#">Oral cleft</a>                               | 76         | <b>3.2068e-8</b>  | <b>2.7844e-6</b>  | 2.0763                | 69                         | 2.22%                     | 6          | <b>1.7865e-3</b> | 2.0015                | 49                       | 233               | 2.18%                   |
| <a href="#">Abnormality of the hard palate</a>           | 81         | <b>6.3399e-8</b>  | <b>5.1651e-6</b>  | 2.0760                | 66                         | 2.13%                     | 9          | <b>3.2742e-3</b> | 1.9810                | 46                       | 221               | 2.05%                   |
| <a href="#">Aplasia/Hypoplasia affecting the eye</a>     | 86         | <b>9.1991e-8</b>  | <b>7.0587e-6</b>  | 2.2063                | 56                         | 1.80%                     | 23         | <b>5.6627e-3</b> | 2.0355                | 37                       | 173               | 1.65%                   |
| <a href="#">Abnormality of thumb phalanx</a>             | 88         | <b>1.2509e-7</b>  | <b>9.3801e-6</b>  | 3.0258                | 31                         | 1.00%                     | 33         | <b>1.2469e-2</b> | 2.6207                | 19                       | 69                | 0.85%                   |
| <a href="#">Clinodactyly</a>                             | 94         | <b>2.8547e-7</b>  | <b>2.0041e-5</b>  | 2.2828                | 48                         | 1.55%                     | 65         | <b>2.8012e-2</b> | 1.9423                | 30                       | 147               | 1.33%                   |
| <a href="#">Microphthalmia</a>                           | 97         | <b>3.1997e-7</b>  | <b>2.1768e-5</b>  | 2.3725                | 44                         | 1.42%                     | 12         | <b>3.7257e-3</b> | 2.3050                | 31                       | 128               | 1.38%                   |
| <a href="#">Finger syndactyly</a>                        | 109        | <b>9.1930e-7</b>  | <b>5.5655e-5</b>  | 3.3557                | 23                         | 0.74%                     | 3          | <b>2.4568e-3</b> | 3.8069                | 16                       | 40                | 0.71%                   |
| <a href="#">Triangular shaped phalanges of the hand</a>  | 111        | <b>1.0230e-6</b>  | <b>6.0820e-5</b>  | 2.7346                | 31                         | 1.00%                     | 58         | <b>2.3789e-2</b> | 2.4111                | 19                       | 75                | 0.85%                   |

| Term Name                                                       | Binom Rank | Binom Raw P-Value | Binom FDR Q-Val  | Binom Fold Enrichment | Binom Observed Region Hits | Binom Region Set Coverage | Hyper Rank | Hyper FDR Q-Val  | Hyper Fold Enrichment | Hyper Observed Gene Hits | Hyper Total Genes | Hyper Gene Set Coverage |
|-----------------------------------------------------------------|------------|-------------------|------------------|-----------------------|----------------------------|---------------------------|------------|------------------|-----------------------|--------------------------|-------------------|-------------------------|
| <a href="#">Abnormal morphology of bones of the upper limbs</a> | 112        | <b>1.1005e-6</b>  | <b>6.4839e-5</b> | 2.1937                | 47                         | 1.51%                     | 35         | <b>1.2072e-2</b> | 2.0440                | 32                       | 149               | 1.42%                   |

The test set of 3,103 genomic regions picked 2,248 (11%) of all 21,395 genes. *Human Phenotype* has 6,599 terms covering 3,215 (15%) of all 21,395 genes, and 244,972 term - gene associations. 6,599 ontology terms (100%) were tested using an annotation count range of [1, Inf].

☐ Mouse Phenotype Single KO (20+ terms)

Global controls

Table controls:  Shown top rows in this table:  Set Term annotation count: Min:  Max:  Set Visualize this table:

| Term Name                                                              | Binom Rank | Binom Raw P-Value | Binom FDR Q-Val   | Binom Fold Enrichment | Binom Observed Region Hits | Binom Region Set Coverage | Hyper Rank | Hyper FDR Q-Val  | Hyper Fold Enrichment | Hyper Observed Gene Hits | Hyper Total Genes | Hyper Gene Set Coverage |
|------------------------------------------------------------------------|------------|-------------------|-------------------|-----------------------|----------------------------|---------------------------|------------|------------------|-----------------------|--------------------------|-------------------|-------------------------|
| <a href="#">abnormal trachea morphology</a>                            | 17         | <b>1.3432e-31</b> | <b>7.2452e-29</b> | 6.0599                | 70                         | 2.26%                     | 526        | <b>3.1097e-2</b> | 2.2069                | 16                       | 69                | 0.71%                   |
| <a href="#">abnormal brain ventricular system morphology</a>           | 28         | <b>1.3143e-19</b> | <b>4.3044e-17</b> | 2.7250                | 108                        | 3.48%                     | 645        | <b>4.7009e-2</b> | 1.5173                | 44                       | 276               | 1.96%                   |
| <a href="#">postnatal lethality, incomplete penetrance</a>             | 31         | <b>5.9181e-19</b> | <b>1.7506e-16</b> | 2.0694                | 179                        | 5.77%                     | 86         | <b>2.1858e-5</b> | 1.6602                | 101                      | 579               | 4.49%                   |
| <a href="#">abnormal erythrocyte morphology</a>                        | 35         | <b>1.2254e-18</b> | <b>3.2106e-16</b> | 2.0537                | 179                        | 5.77%                     | 329        | <b>8.9542e-3</b> | 1.3902                | 104                      | 712               | 4.63%                   |
| <a href="#">abnormal brain development</a>                             | 37         | <b>4.4079e-18</b> | <b>1.0925e-15</b> | 2.0357                | 177                        | 5.70%                     | 104        | <b>5.2967e-5</b> | 1.6237                | 101                      | 592               | 4.49%                   |
| <a href="#">abnormal esophageal smooth muscle morphology</a>           | 80         | <b>2.7347e-9</b>  | <b>3.1347e-7</b>  | 14.9062               | 10                         | 0.32%                     | 258        | <b>4.3216e-3</b> | 9.5173                | 4                        | 4                 | 0.18%                   |
| <a href="#">abnormal renal glomerulus basement membrane morphology</a> | 97         | <b>5.9975e-8</b>  | <b>5.6698e-6</b>  | 4.0934                | 22                         | 0.71%                     | 125        | <b>1.4487e-4</b> | 3.8584                | 15                       | 37                | 0.67%                   |
| <a href="#">abnormal hair growth</a>                                   | 109        | <b>2.4744e-7</b>  | <b>2.0817e-5</b>  | 2.1053                | 58                         | 1.87%                     | 90         | <b>3.0880e-5</b> | 2.1506                | 47                       | 208               | 2.09%                   |
| <a href="#">abnormal esophagus development</a>                         | 122        | <b>7.5993e-7</b>  | <b>5.7120e-5</b>  | 9.4344                | 9                          | 0.29%                     | 164        | <b>7.1321e-4</b> | 9.5173                | 5                        | 5                 | 0.22%                   |
| <a href="#">abnormal cornea morphology</a>                             | 126        | <b>9.6236e-7</b>  | <b>7.0038e-5</b>  | 2.1445                | 50                         | 1.61%                     | 80         | <b>1.3037e-5</b> | 2.3649                | 41                       | 165               | 1.82%                   |
| <a href="#">abnormal incisor morphology</a>                            | 129        | <b>1.0342e-6</b>  | <b>7.3513e-5</b>  | 2.5492                | 35                         | 1.13%                     | 178        | <b>9.5195e-4</b> | 2.5453                | 23                       | 86                | 1.02%                   |
| <a href="#">abnormal keratinocyte morphology</a>                       | 134        | <b>1.3741e-6</b>  | <b>9.4035e-5</b>  | 3.3836                | 22                         | 0.71%                     | 222        | <b>3.1107e-3</b> | 2.9742                | 15                       | 48                | 0.67%                   |
| <a href="#">abnormal renal glomerulus basement membrane thickness</a>  | 139        | <b>1.8537e-6</b>  | <b>1.2229e-4</b>  | 4.3169                | 16                         | 0.52%                     | 224        | <b>3.2176e-3</b> | 3.9656                | 10                       | 24                | 0.44%                   |
| <a href="#">alopecia</a>                                               | 141        | <b>1.8843e-6</b>  | <b>1.2254e-4</b>  | 2.5189                | 34                         | 1.10%                     | 102        | <b>5.0241e-5</b> | 2.7192                | 28                       | 98                | 1.25%                   |
| <a href="#">abnormal eye size</a>                                      | 147        | <b>2.9844e-6</b>  | <b>1.8617e-4</b>  | 2.0245                | 52                         | 1.68%                     | 115        | <b>9.2589e-5</b> | 2.1800                | 41                       | 179               | 1.82%                   |
| <a href="#">abnormal cranial suture morphology</a>                     | 152        | <b>4.0612e-6</b>  | <b>2.4501e-4</b>  | 2.8994                | 25                         | 0.81%                     | 103        | <b>5.2780e-5</b> | 3.4775                | 19                       | 52                | 0.85%                   |
| <a href="#">microphthalmia</a>                                         | 161        | <b>6.1808e-6</b>  | <b>3.5204e-4</b>  | 2.0174                | 49                         | 1.58%                     | 112        | <b>8.7548e-5</b> | 2.2360                | 39                       | 166               | 1.73%                   |
| <a href="#">thick epidermis</a>                                        | 171        | <b>1.1351e-5</b>  | <b>6.0872e-4</b>  | 2.6634                | 26                         | 0.84%                     | 157        | <b>5.7890e-4</b> | 2.7759                | 21                       | 72                | 0.93%                   |
| <a href="#">abnormal palatine bone horizontal plate morphology</a>     | 173        | <b>1.2354e-5</b>  | <b>6.5482e-4</b>  | 3.5259                | 17                         | 0.55%                     | 198        | <b>2.0482e-3</b> | 3.8774                | 11                       | 27                | 0.49%                   |

| Term Name                                     | Binom Rank | Binom Raw P-Value | Binom FDR Q-Val | Binom Fold Enrichment | Binom Observed Region Hits | Binom Region Set Coverage | Hyper Rank | Hyper FDR Q-Val | Hyper Fold Enrichment | Hyper Observed Gene Hits | Hyper Total Genes | Hyper Gene Set Coverage |
|-----------------------------------------------|------------|-------------------|-----------------|-----------------------|----------------------------|---------------------------|------------|-----------------|-----------------------|--------------------------|-------------------|-------------------------|
| <a href="#">abnormal outer ear morphology</a> | 175        | 1.4051e-5         | 7.3629e-4       | 2.2236                | 36                         | 1.16%                     | 188        | 1.3991e-3       | 2.3344                | 26                       | 106               | 1.16%                   |

The test set of 3,103 genomic regions picked 2,248 (11%) of all 21,395 genes.  
*Mouse Phenotype Single KO* has 9,170 terms covering 9,466 (44%) of all 21,395 genes, and 551,620 term - gene associations.  
 9,170 ontology terms (100%) were tested using an annotation count range of [1, Inf].

**Mouse Phenotype (20+ terms)**

Global controls

Table controls:  Shown top rows in this table:   Term annotation count: Min:  Max:   Visualize this table:

| Term Name                                                    | Binom Rank | Binom Raw P-Value | Binom FDR Q-Val | Binom Fold Enrichment | Binom Observed Region Hits | Binom Region Set Coverage | Hyper Rank | Hyper FDR Q-Val | Hyper Fold Enrichment | Hyper Observed Gene Hits | Hyper Total Genes | Hyper Gene Set Coverage |
|--------------------------------------------------------------|------------|-------------------|-----------------|-----------------------|----------------------------|---------------------------|------------|-----------------|-----------------------|--------------------------|-------------------|-------------------------|
| <a href="#">abnormal digestive system morphology</a>         | 18         | 6.6267e-30        | 3.5251e-27      | 2.0062                | 308                        | 9.93%                     | 59         | 1.4257e-9       | 1.6207                | 188                      | 1,104             | 8.36%                   |
| <a href="#">abnormal trachea morphology</a>                  | 19         | 4.0448e-29        | 2.0384e-26      | 4.9653                | 77                         | 2.48%                     | 329        | 9.7812e-4       | 2.4595                | 23                       | 89                | 1.02%                   |
| <a href="#">abnormal mean corpuscular volume</a>             | 40         | 3.3527e-21        | 8.0256e-19      | 3.1482                | 94                         | 3.03%                     | 893        | 3.4596e-2       | 1.5539                | 40                       | 245               | 1.78%                   |
| <a href="#">abnormal blood urea nitrogen level</a>           | 43         | 3.2717e-20        | 7.2852e-18      | 2.9968                | 96                         | 3.09%                     | 654        | 1.3867e-2       | 1.6465                | 41                       | 237               | 1.82%                   |
| <a href="#">abnormal brain ventricular system morphology</a> | 54         | 4.0917e-18        | 7.2552e-16      | 2.3295                | 132                        | 4.25%                     | 599        | 9.7321e-3       | 1.5130                | 62                       | 390               | 2.76%                   |
| <a href="#">abnormal respiratory epithelium morphology</a>   | 59         | 1.7901e-17        | 2.9051e-15      | 2.6339                | 101                        | 3.25%                     | 517        | 6.0016e-3       | 1.6861                | 45                       | 254               | 2.00%                   |
| <a href="#">abnormal tail morphology</a>                     | 85         | 2.0432e-14        | 2.3016e-12      | 2.1339                | 124                        | 4.00%                     | 138        | 1.3824e-5       | 1.7975                | 78                       | 413               | 3.47%                   |
| <a href="#">curly tail</a>                                   | 88         | 4.8934e-14        | 5.3243e-12      | 4.2504                | 41                         | 1.32%                     | 574        | 8.7165e-3       | 2.3793                | 17                       | 68                | 0.76%                   |
| <a href="#">increased regulatory T cell number</a>           | 92         | 7.4708e-14        | 7.7753e-12      | 4.4985                | 38                         | 1.22%                     | 672        | 1.5378e-2       | 2.3072                | 16                       | 66                | 0.71%                   |
| <a href="#">abnormal brainstem morphology</a>                | 101        | 4.0140e-13        | 3.8053e-11      | 2.3760                | 89                         | 2.87%                     | 135        | 1.1412e-5       | 2.0844                | 53                       | 242               | 2.36%                   |
| <a href="#">abnormal midbrain morphology</a>                 | 112        | 2.0878e-12        | 1.7849e-10      | 2.6795                | 67                         | 2.16%                     | 244        | 1.9432e-4       | 2.1823                | 36                       | 157               | 1.60%                   |
| <a href="#">abnormal regulatory T cell number</a>            | 113        | 2.2854e-12        | 1.9365e-10      | 2.9883                | 56                         | 1.80%                     | 427        | 2.6466e-3       | 2.0071                | 31                       | 147               | 1.38%                   |
| <a href="#">abnormal regulatory T cell morphology</a>        | 121        | 6.1611e-12        | 4.8754e-10      | 2.9108                | 56                         | 1.80%                     | 461        | 3.6095e-3       | 1.9669                | 31                       | 150               | 1.38%                   |
| <a href="#">hair follicle degeneration</a>                   | 122        | 6.1648e-12        | 4.8384e-10      | 6.1226                | 24                         | 0.77%                     | 148        | 2.0863e-5       | 4.5946                | 14                       | 29                | 0.62%                   |
| <a href="#">decreased bone marrow cell number</a>            | 134        | 2.5847e-11        | 1.8469e-9       | 2.7704                | 57                         | 1.84%                     | 622        | 1.0812e-2       | 1.8421                | 30                       | 155               | 1.33%                   |
| <a href="#">abnormal circulating amino acid level</a>        | 136        | 4.3498e-11        | 3.0624e-9       | 2.3833                | 73                         | 2.35%                     | 937        | 3.5475e-2       | 1.5475                | 40                       | 246               | 1.78%                   |
| <a href="#">abnormal amino acid level</a>                    | 144        | 1.3331e-10        | 8.8645e-9       | 2.1738                | 84                         | 2.71%                     | 952        | 3.7798e-2       | 1.4784                | 48                       | 309               | 2.14%                   |
| <a href="#">increased cell proliferation</a>                 | 151        | 1.8315e-10        | 1.1614e-8       | 2.2201                | 79                         | 2.55%                     | 334        | 1.0599e-3       | 1.8057                | 48                       | 253               | 2.14%                   |
| <a href="#">abnormal hair growth</a>                         | 153        | 2.0547e-10        | 1.2859e-8       | 2.1103                | 88                         | 2.84%                     | 105        | 8.8795e-7       | 2.0528                | 66                       | 306               | 2.94%                   |
| <a href="#">small hair follicles</a>                         | 168        | 7.3622e-10        | 4.1960e-8       | 7.7448                | 16                         | 0.52%                     | 774        | 2.3534e-2       | 4.0789                | 6                        | 14                | 0.27%                   |

The test set of 3,103 genomic regions picked 2,248 (11%) of all 21,395 genes.  
*Mouse Phenotype* has 9,575 terms covering 9,654 (45%) of all 21,395 genes, and 705,265 term - gene associations.  
 9,575 ontology terms (100%) were tested using an annotation count range of [1, Inf].
