# Supplementary material for: AP-2α and AP-2β cooperatively function in the craniofacial surface ectoderm to regulate chromatin and gene expression dynamics during facial development
Source: eLife journal article supplement (doi:10.7554/elife.70511), 2022-03-25
Supplement: supp [file elife-70511-supp-v1.zip]

⊕ Job Description

⊕ Region-Gene Association Graphs

What do these graphs illustrate?

Number of associated genes per region

[Download as PDF.](#)

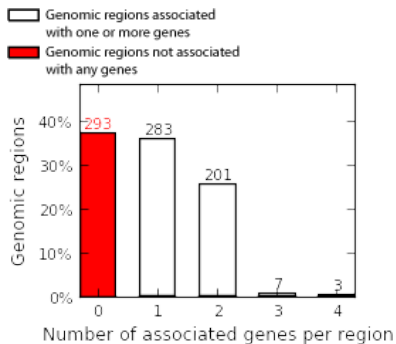

Binned by orientation and distance to TSS

[Download as PDF.](#)

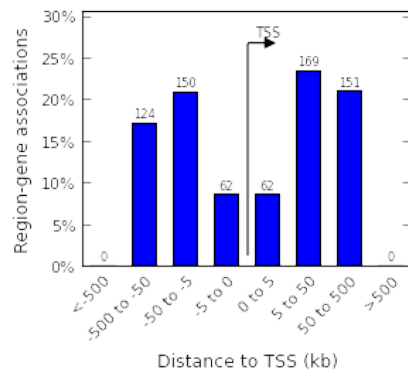

Binned by absolute distance to TSS

[Download as PDF.](#)

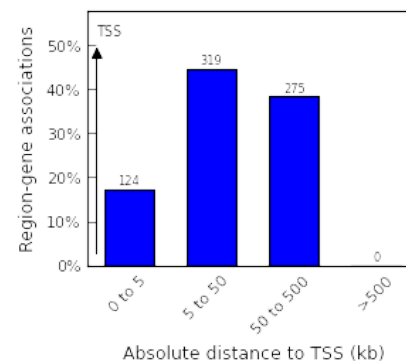

⊕ Global Controls

Global Export

Which data is exported by each option?

⊕ Ensembl Genes (no terms)

Global controls

⊖ GO Biological Process (20+ terms)

Global controls

Table controls:

Shown top rows in this table:

Term annotation count: Min:  Max:

Visualize this table:

| Term Name                                                        | Binom Rank | Binom Raw P-Value | Binom FDR Q-Val | Binom Fold Enrichment | Binom Observed Region Hits | Binom Region Set Coverage | Hyper Rank | Hyper FDR Q-Val | Hyper Fold Enrichment | Hyper Observed Gene Hits | Hyper Total Genes | Hyper Gene Set Coverage |
|------------------------------------------------------------------|------------|-------------------|-----------------|-----------------------|----------------------------|---------------------------|------------|-----------------|-----------------------|--------------------------|-------------------|-------------------------|
| <a href="#">regulation of protein binding</a>                    | 11         | 3.3774e-49        | 4.0191e-46      | 10.7800               | 72                         | 9.15%                     | 164        | 9.1956e-4       | 3.4144                | 17                       | 198               | 3.16%                   |
| <a href="#">pattern specification process</a>                    | 12         | 4.6653e-48        | 5.0891e-45      | 6.3134                | 101                        | 12.83%                    | 19         | 1.7294e-9       | 3.6152                | 40                       | 440               | 7.43%                   |
| <a href="#">regulation of binding</a>                            | 23         | 4.6367e-40        | 2.6389e-37      | 6.7453                | 80                         | 10.17%                    | 187        | 1.9099e-3       | 2.6283                | 23                       | 348               | 4.28%                   |
| <a href="#">brain development</a>                                | 33         | 2.1480e-27        | 8.5206e-25      | 3.5578                | 100                        | 12.71%                    | 150        | 4.0043e-4       | 2.1613                | 40                       | 736               | 7.43%                   |
| <a href="#">central nervous system development</a>               | 35         | 7.4253e-27        | 2.7771e-24      | 3.2194                | 111                        | 14.10%                    | 118        | 7.4670e-5       | 2.1181                | 49                       | 920               | 9.11%                   |
| <a href="#">head development</a>                                 | 36         | 1.1628e-26        | 4.2282e-24      | 3.4224                | 102                        | 12.96%                    | 142        | 3.1632e-4       | 2.1386                | 42                       | 781               | 7.81%                   |
| <a href="#">locomotion</a>                                       | 39         | 2.6540e-24        | 8.9080e-22      | 2.9700                | 112                        | 14.23%                    | 296        | 2.3415e-2       | 1.6740                | 45                       | 1,069             | 8.36%                   |
| <a href="#">nervous system development</a>                       | 48         | 4.6297e-21        | 1.2626e-18      | 2.1614                | 164                        | 20.84%                    | 76         | 2.6415e-6       | 1.7711                | 97                       | 2,178             | 18.03%                  |
| <a href="#">regulation of anatomical structure morphogenesis</a> | 49         | 7.7588e-21        | 2.0727e-18      | 2.9249                | 98                         | 12.45%                    | 141        | 2.8664e-4       | 2.0427                | 47                       | 915               | 8.74%                   |
| <a href="#">cell projection organization</a>                     | 52         | 2.5787e-20        | 6.4914e-18      | 2.8343                | 100                        | 12.71%                    | 279        | 1.5997e-2       | 1.7343                | 43                       | 986               | 7.99%                   |

| Term Name                                                                   | Binom Rank | Binom Raw P-Value | Binom FDR Q-Val   | Binom Fold Enrichment | Binom Observed Region Hits | Binom Region Set Coverage | Hyper Rank | Hyper FDR Q-Val  | Hyper Fold Enrichment | Hyper Observed Gene Hits | Hyper Total Genes | Hyper Gene Set Coverage |
|-----------------------------------------------------------------------------|------------|-------------------|-------------------|-----------------------|----------------------------|---------------------------|------------|------------------|-----------------------|--------------------------|-------------------|-------------------------|
| <a href="#">DNA replication-dependent nucleosome assembly</a>               | 53         | <b>4.0209e-20</b> | <b>9.9308e-18</b> | 54.8546               | 14                         | 1.78%                     | 72         | <b>9.3054e-7</b> | 12.0508               | 10                       | 33                | 1.86%                   |
| <a href="#">regulation of developmental process</a>                         | 56         | <b>1.3150e-19</b> | <b>3.0738e-17</b> | 2.0635                | 168                        | 21.35%                    | 22         | <b>1.8492e-9</b> | 1.9191                | 115                      | 2,383             | 21.38%                  |
| <a href="#">protein heterotetramerization</a>                               | 58         | <b>9.7633e-19</b> | <b>2.2035e-16</b> | 22.6602               | 18                         | 2.29%                     | 21         | <b>1.7387e-9</b> | 12.3722               | 14                       | 45                | 2.60%                   |
| <a href="#">chromatin silencing at rDNA</a>                                 | 76         | <b>5.1014e-14</b> | <b>8.7864e-12</b> | 19.5040               | 14                         | 1.78%                     | 107        | <b>4.7332e-5</b> | 7.9535                | 10                       | 50                | 1.86%                   |
| <a href="#">innate immune response in mucosa</a>                            | 82         | <b>1.5673e-13</b> | <b>2.5020e-11</b> | 40.9740               | 10                         | 1.27%                     | 115        | <b>5.9591e-5</b> | 13.2559               | 7                        | 21                | 1.30%                   |
| <a href="#">protein heterooligomerization</a>                               | 94         | <b>1.3399e-11</b> | <b>1.8660e-9</b>  | 6.8756                | 21                         | 2.67%                     | 74         | <b>1.5359e-6</b> | 5.6338                | 17                       | 120               | 3.16%                   |
| <a href="#">negative regulation of transcription, DNA-templated</a>         | 98         | <b>2.4885e-11</b> | <b>3.3239e-9</b>  | 2.1766                | 86                         | 10.93%                    | 42         | <b>5.4079e-8</b> | 2.2468                | 70                       | 1,239             | 13.01%                  |
| <a href="#">nucleosome assembly</a>                                         | 100        | <b>4.4017e-11</b> | <b>5.7619e-9</b>  | 8.5597                | 17                         | 2.16%                     | 23         | <b>2.6306e-9</b> | 7.1653                | 20                       | 111               | 3.72%                   |
| <a href="#">protein tetramerization</a>                                     | 101        | <b>5.7845e-11</b> | <b>7.4969e-9</b>  | 5.9953                | 22                         | 2.80%                     | 97         | <b>1.6537e-5</b> | 4.7276                | 17                       | 143               | 3.16%                   |
| <a href="#">negative regulation of nucleic acid-templated transcription</a> | 102        | <b>6.0915e-11</b> | <b>7.8174e-9</b>  | 2.1375                | 86                         | 10.93%                    | 47         | <b>1.5556e-7</b> | 2.1868                | 70                       | 1,273             | 13.01%                  |

The test set of 787 genomic regions picked 538 (3%) of all 21,395 genes.  
 GO Biological Process has 13,090 terms covering 17,925 (84%) of all 21,395 genes, and 1,163,819 term - gene associations.  
 13,090 ontology terms (100%) were tested using an annotation count range of [1, Inf].

GO Cellular Component (9 terms)

Global controls

Table controls:  Shown top rows in this table:   Term annotation count: Min:  Max:   Visualize this table:

| Term Name                                   | Binom Rank | Binom Raw P-Value | Binom FDR Q-Val   | Binom Fold Enrichment | Binom Observed Region Hits | Binom Region Set Coverage | Hyper Rank | Hyper FDR Q-Val   | Hyper Fold Enrichment | Hyper Observed Gene Hits | Hyper Total Genes | Hyper Gene Set Coverage |
|---------------------------------------------|------------|-------------------|-------------------|-----------------------|----------------------------|---------------------------|------------|-------------------|-----------------------|--------------------------|-------------------|-------------------------|
| <a href="#">nuclear nucleosome</a>          | 23         | <b>2.6968e-15</b> | <b>1.9863e-13</b> | 24.2849               | 14                         | 1.78%                     | 12         | <b>7.3036e-6</b>  | 9.6994                | 10                       | 41                | 1.86%                   |
| <a href="#">nucleosome</a>                  | 25         | <b>1.9105e-12</b> | <b>1.2946e-10</b> | 10.5013               | 17                         | 2.16%                     | 1          | <b>9.6018e-19</b> | 10.1104               | 30                       | 118               | 5.58%                   |
| <a href="#">DNA packaging complex</a>       | 28         | <b>1.3103e-11</b> | <b>7.9273e-10</b> | 9.2680                | 17                         | 2.16%                     | 2          | <b>3.7732e-18</b> | 9.4685                | 30                       | 126               | 5.58%                   |
| <a href="#">nuclear chromatin</a>           | 48         | <b>2.4684e-7</b>  | <b>8.7114e-6</b>  | 3.1089                | 28                         | 3.56%                     | 27         | <b>3.6489e-3</b>  | 2.5657                | 22                       | 341               | 4.09%                   |
| <a href="#">chromatin</a>                   | 49         | <b>4.0390e-7</b>  | <b>1.3963e-5</b>  | 2.6327                | 35                         | 4.45%                     | 4          | <b>6.0265e-11</b> | 3.5179                | 46                       | 520               | 8.55%                   |
| <a href="#">protein-DNA complex</a>         | 51         | <b>7.4228e-7</b>  | <b>2.4655e-5</b>  | 4.1302                | 18                         | 2.29%                     | 3          | <b>1.2662e-12</b> | 5.8426                | 31                       | 211               | 5.76%                   |
| <a href="#">extracellular matrix</a>        | 56         | <b>1.1946e-5</b>  | <b>3.6136e-4</b>  | 2.1654                | 38                         | 4.83%                     | 25         | <b>2.6720e-3</b>  | 2.2341                | 30                       | 534               | 5.58%                   |
| <a href="#">basement membrane</a>           | 72         | <b>1.6216e-3</b>  | <b>3.8153e-2</b>  | 2.9492                | 11                         | 1.40%                     | 33         | <b>3.0857e-2</b>  | 3.8075                | 9                        | 94                | 1.67%                   |
| <a href="#">cell-cell adherens junction</a> | 73         | <b>1.8493e-3</b>  | <b>4.2914e-2</b>  | 2.8992                | 11                         | 1.40%                     | 31         | <b>9.8123e-3</b>  | 4.0579                | 10                       | 98                | 1.86%                   |

The test set of 787 genomic regions picked 538 (3%) of all 21,395 genes.  
 GO Cellular Component has 1,694 terms covering 19,074 (89%) of all 21,395 genes, and 371,380 term - gene associations.  
 1,694 ontology terms (100%) were tested using an annotation count range of [1, Inf].

GO Molecular Function (7 terms)

Global controls

Table controls:  Shown top rows in this table:   Term annotation count: Min:  Max:   Visualize this table:

| Term Name                                                                                                                       | Binom Rank | Binom Raw P-Value | Binom FDR Q-Val | Binom Fold Enrichment | Binom Observed Region Hits | Binom Region Set Coverage | Hyper Rank | Hyper FDR Q-Val | Hyper Fold Enrichment | Hyper Observed Gene Hits | Hyper Total Genes | Hyper Gene Set Coverage |
|---------------------------------------------------------------------------------------------------------------------------------|------------|-------------------|-----------------|-----------------------|----------------------------|---------------------------|------------|-----------------|-----------------------|--------------------------|-------------------|-------------------------|
| <a href="#">frizzled binding</a>                                                                                                | 22         | 4.7801e-9         | 8.9757e-7       | 8.9784                | 13                         | 1.65%                     | 22         | 7.3648e-3       | 7.3256                | 7                        | 38                | 1.30%                   |
| <a href="#">G-protein coupled receptor binding</a>                                                                              | 24         | 1.0489e-8         | 1.8055e-6       | 3.6336                | 28                         | 3.56%                     | 26         | 3.5468e-2       | 2.6934                | 17                       | 251               | 3.16%                   |
| <a href="#">chromatin DNA binding</a>                                                                                           | 25         | 1.2979e-8         | 2.1447e-6       | 5.8248                | 17                         | 2.16%                     | 23         | 1.5759e-2       | 4.0504                | 11                       | 108               | 2.04%                   |
| <a href="#">chromatin binding</a>                                                                                               | 26         | 1.5735e-8         | 2.5001e-6       | 2.5503                | 46                         | 5.84%                     | 10         | 1.4270e-5       | 2.6985                | 38                       | 560               | 7.06%                   |
| <a href="#">sequence-specific DNA binding</a>                                                                                   | 27         | 3.0690e-8         | 4.6956e-6       | 2.0067                | 72                         | 9.15%                     | 9          | 3.4330e-7       | 2.3086                | 62                       | 1,068             | 11.52%                  |
| <a href="#">transcriptional activator activity, RNA polymerase II transcription regulatory region sequence-specific binding</a> | 30         | 2.9998e-7         | 4.1307e-5       | 2.5066                | 39                         | 4.96%                     | 13         | 9.5919e-5       | 2.8541                | 30                       | 418               | 5.58%                   |
| <a href="#">protein heterodimerization activity</a>                                                                             | 54         | 3.0945e-5         | 2.3673e-3       | 2.1202                | 36                         | 4.57%                     | 4          | 1.5900e-9       | 3.2901                | 46                       | 556               | 8.55%                   |

The test set of 787 genomic regions picked 538 (3%) of all 21,395 genes.  
 GO Molecular Function has 4,131 terms covering 17,189 (80%) of all 21,395 genes, and 227,341 term - gene associations.  
 4,131 ontology terms (100%) were tested using an annotation count range of [1, Inf].

Human Phenotype (20+ terms)

Global controls

Table controls:  Shown top rows in this table:   Term annotation count: Min:  Max:   Visualize this table:

| Term Name                                                    | Binom Rank | Binom Raw P-Value | Binom FDR Q-Val | Binom Fold Enrichment | Binom Observed Region Hits | Binom Region Set Coverage | Hyper Rank | Hyper FDR Q-Val | Hyper Fold Enrichment | Hyper Observed Gene Hits | Hyper Total Genes | Hyper Gene Set Coverage |
|--------------------------------------------------------------|------------|-------------------|-----------------|-----------------------|----------------------------|---------------------------|------------|-----------------|-----------------------|--------------------------|-------------------|-------------------------|
| <a href="#">Recurrent upper respiratory tract infections</a> | 11         | 5.9186e-65        | 3.5506e-62      | 30.9501               | 58                         | 7.37%                     | 255        | 4.8293e-2       | 3.9768                | 7                        | 70                | 1.30%                   |
| <a href="#">Abnormality of the nasopharynx</a>               | 16         | 1.8390e-59        | 7.5847e-57      | 22.7873               | 60                         | 7.62%                     | 120        | 9.8230e-3       | 4.4739                | 9                        | 80                | 1.67%                   |
| <a href="#">Abnormality of the pharynx</a>                   | 18         | 2.8977e-57        | 1.0623e-54      | 20.8675               | 60                         | 7.62%                     | 162        | 1.7760e-2       | 3.9768                | 9                        | 90                | 1.67%                   |
| <a href="#">Conductive hearing impairment</a>                | 19         | 1.2727e-56        | 4.4204e-54      | 20.3359               | 60                         | 7.62%                     | 195        | 2.5720e-2       | 4.0787                | 8                        | 78                | 1.49%                   |
| <a href="#">Functional abnormality of the middle ear</a>     | 20         | 1.0032e-55        | 3.3099e-53      | 19.6158               | 60                         | 7.62%                     | 205        | 3.1434e-2       | 3.9277                | 8                        | 81                | 1.49%                   |
| <a href="#">Abnormality of the middle ear</a>                | 21         | 4.2467e-48        | 1.3345e-45      | 13.1214               | 63                         | 8.01%                     | 226        | 4.5449e-2       | 2.8970                | 11                       | 151               | 2.04%                   |
| <a href="#">Abnormality of the upper respiratory tract</a>   | 23         | 4.8568e-47        | 1.3935e-44      | 11.5820               | 66                         | 8.39%                     | 116        | 8.6702e-3       | 3.1633                | 14                       | 176               | 2.60%                   |
| <a href="#">Abnormality of the nose</a>                      | 27         | 1.1965e-34        | 2.9244e-32      | 4.4136                | 100                        | 12.71%                    | 19         | 3.9342e-4       | 2.2888                | 40                       | 695               | 7.43%                   |
| <a href="#">Hearing impairment</a>                           | 30         | 4.0454e-33        | 8.8986e-31      | 4.9860                | 85                         | 10.80%                    | 140        | 1.3498e-2       | 2.0544                | 28                       | 542               | 5.20%                   |
| <a href="#">Hearing abnormality</a>                          | 31         | 6.1047e-33        | 1.2995e-30      | 4.9566                | 85                         | 10.80%                    | 149        | 1.4271e-2       | 2.0394                | 28                       | 546               | 5.20%                   |
| <a href="#">Abnormality of the ear</a>                       | 33         | 5.3954e-31        | 1.0789e-28      | 3.6724                | 109                        | 13.85%                    | 48         | 1.4405e-3       | 1.9670                | 46                       | 930               | 8.55%                   |
| <a href="#">Abnormality of the face</a>                      | 35         | 3.2887e-29        | 6.2006e-27      | 3.0068                | 132                        | 16.77%                    | 2          | 3.3248e-4       | 1.9469                | 68                       | 1,389             | 12.64%                  |

| Term Name                                    | Binom Rank | Binom Raw P-Value | Binom FDR Q-Val   | Binom Fold Enrichment | Binom Observed Region Hits | Binom Region Set Coverage | Hyper Rank | Hyper FDR Q-Val  | Hyper Fold Enrichment | Hyper Observed Gene Hits | Hyper Total Genes | Hyper Gene Set Coverage |
|----------------------------------------------|------------|-------------------|-------------------|-----------------------|----------------------------|---------------------------|------------|------------------|-----------------------|--------------------------|-------------------|-------------------------|
| <b>Abnormality of the head</b>               | 39         | <b>1.1600e-26</b> | <b>1.9627e-24</b> | 2.7511                | 137                        | 17.41%                    | 8          | <b>2.4106e-4</b> | 1.8312                | 74                       | 1,607             | 13.75%                  |
| <b>Abnormality of head or neck</b>           | 40         | <b>3.2823e-26</b> | <b>5.4151e-24</b> | 2.7206                | 137                        | 17.41%                    | 11         | <b>3.0947e-4</b> | 1.8043                | 74                       | 1,631             | 13.75%                  |
| <b>Abnormality of the periorbital region</b> | 42         | <b>2.6820e-9</b>  | <b>4.2140e-7</b>  | 3.5644                | 31                         | 3.94%                     | 1          | <b>4.8351e-4</b> | 3.7181                | 23                       | 246               | 4.28%                   |
| <b>Abnormality of skin adnexa morphology</b> | 43         | <b>7.9423e-9</b>  | <b>1.2189e-6</b>  | 2.5174                | 49                         | 6.23%                     | 6          | <b>2.3365e-4</b> | 2.5144                | 38                       | 601               | 7.06%                   |
| <b>Abnormality of the urethra</b>            | 44         | <b>9.9646e-9</b>  | <b>1.4945e-6</b>  | 4.5086                | 22                         | 2.80%                     | 30         | <b>7.1423e-4</b> | 4.4540                | 14                       | 125               | 2.60%                   |
| <b>Abnormality of the eyebrow</b>            | 45         | <b>2.3899e-8</b>  | <b>3.5046e-6</b>  | 3.7052                | 26                         | 3.30%                     | 15         | <b>3.1887e-4</b> | 3.7969                | 19                       | 199               | 3.53%                   |
| <b>Abnormality of the hand</b>               | 46         | <b>3.2637e-8</b>  | <b>4.6820e-6</b>  | 2.4032                | 49                         | 6.23%                     | 3          | <b>2.6289e-4</b> | 2.5342                | 39                       | 612               | 7.25%                   |
| <b>Cleft lip</b>                             | 47         | <b>4.4126e-8</b>  | <b>6.1954e-6</b>  | 4.7559                | 19                         | 2.41%                     | 42         | <b>1.1262e-3</b> | 4.8203                | 12                       | 99                | 2.23%                   |

The test set of 787 genomic regions picked 538 (3%) of all 21,395 genes.  
*Human Phenotype* has 6,599 terms covering 3,215 (15%) of all 21,395 genes, and 244,972 term - gene associations.  
 6,599 ontology terms (100%) were tested using an annotation count range of [1, Inf].

### ☐ Mouse Phenotype Single KO (20+ terms)

Global controls

Table controls:  Shown top rows in this table:   Term annotation count: Min:  Max:   Visualize this table:

| Term Name                                            | Binom Rank | Binom Raw P-Value | Binom FDR Q-Val   | Binom Fold Enrichment | Binom Observed Region Hits | Binom Region Set Coverage | Hyper Rank | Hyper FDR Q-Val   | Hyper Fold Enrichment | Hyper Observed Gene Hits | Hyper Total Genes | Hyper Gene Set Coverage |
|------------------------------------------------------|------------|-------------------|-------------------|-----------------------|----------------------------|---------------------------|------------|-------------------|-----------------------|--------------------------|-------------------|-------------------------|
| <b>abnormal trachea morphology</b>                   | 13         | <b>3.7820e-58</b> | <b>2.6678e-55</b> | 20.8210               | 61                         | 7.75%                     | 111        | <b>4.6035e-3</b>  | 5.1871                | 9                        | 69                | 1.67%                   |
| <b>abnormal digestive system morphology</b>          | 19         | <b>1.9968e-32</b> | <b>9.6373e-30</b> | 3.7591                | 111                        | 14.10%                    | 21         | <b>2.4122e-5</b>  | 2.3279                | 48                       | 820               | 8.92%                   |
| <b>digestive/alimentary phenotype</b>                | 22         | <b>3.4243e-31</b> | <b>1.4273e-28</b> | 3.3585                | 122                        | 15.50%                    | 20         | <b>2.3333e-5</b>  | 2.1445                | 57                       | 1,057             | 10.59%                  |
| <b>postnatal lethality, incomplete penetrance</b>    | 24         | <b>6.1193e-29</b> | <b>2.3381e-26</b> | 4.1024                | 90                         | 11.44%                    | 69         | <b>6.3329e-4</b>  | 2.3352                | 34                       | 579               | 6.32%                   |
| <b>abnormal brain development</b>                    | 26         | <b>1.7542e-27</b> | <b>6.1868e-25</b> | 3.9904                | 88                         | 11.18%                    | 158        | <b>1.4155e-2</b>  | 2.0153                | 30                       | 592               | 5.58%                   |
| <b>lethality during fetal growth through weaning</b> | 28         | <b>4.3656e-27</b> | <b>1.4297e-24</b> | 2.5019                | 161                        | 20.46%                    | 7          | <b>2.4442e-9</b>  | 2.1240                | 94                       | 1,760             | 17.47%                  |
| <b>abnormal respiratory system morphology</b>        | 29         | <b>2.4420e-26</b> | <b>7.7217e-24</b> | 3.6251                | 94                         | 11.94%                    | 80         | <b>1.0637e-3</b>  | 2.1217                | 39                       | 731               | 7.25%                   |
| <b>abnormal nervous system development</b>           | 30         | <b>6.9579e-25</b> | <b>2.1268e-22</b> | 3.0816                | 109                        | 13.85%                    | 67         | <b>6.1322e-4</b>  | 1.9967                | 48                       | 956               | 8.92%                   |
| <b>postnatal lethality</b>                           | 31         | <b>1.7867e-23</b> | <b>5.2851e-21</b> | 2.9933                | 107                        | 13.60%                    | 55         | <b>3.5407e-4</b>  | 2.0340                | 49                       | 958               | 9.11%                   |
| <b>respiratory system phenotype</b>                  | 34         | <b>1.9534e-22</b> | <b>5.2686e-20</b> | 2.8097                | 112                        | 14.23%                    | 61         | <b>4.3644e-4</b>  | 1.9186                | 55                       | 1,140             | 10.22%                  |
| <b>abnormal craniofacial morphology</b>              | 45         | <b>4.8215e-12</b> | <b>9.8251e-10</b> | 2.3042                | 82                         | 10.42%                    | 1          | <b>8.5832e-11</b> | 2.8257                | 68                       | 957               | 12.64%                  |
| <b>craniofacial phenotype</b>                        | 46         | <b>5.4121e-12</b> | <b>1.0789e-9</b>  | 2.2988                | 82                         | 10.42%                    | 2          | <b>5.2573e-11</b> | 2.8139                | 68                       | 961               | 12.64%                  |
| <b>abnormal palate morphology</b>                    | 47         | <b>5.8652e-12</b> | <b>1.1443e-9</b>  | 3.8249                | 38                         | 4.83%                     | 8          | <b>1.3741e-8</b>  | 4.6983                | 28                       | 237               | 5.20%                   |
| <b>abnormal head morphology</b>                      | 48         | <b>1.0399e-11</b> | <b>1.9866e-9</b>  | 2.4677                | 70                         | 8.89%                     | 3          | <b>9.4308e-11</b> | 3.0713                | 58                       | 751               | 10.78%                  |
| <b>abnormal facial morphology</b>                    | 52         | <b>3.3636e-10</b> | <b>5.9315e-8</b>  | 2.5148                | 58                         | 7.37%                     | 9          | <b>2.0495e-8</b>  | 3.0539                | 46                       | 599               | 8.55%                   |
| <b>abnormal cranium morphology</b>                   | 54         | <b>8.8416e-10</b> | <b>1.5014e-7</b>  | 2.4722                | 57                         | 7.24%                     | 12         | <b>3.0486e-8</b>  | 3.0383                | 45                       | 589               | 8.36%                   |

| Term Name                                                    | Binom Rank | Binom Raw P-Value | Binom FDR Q-Val  | Binom Fold Enrichment | Binom Observed Region Hits | Binom Region Set Coverage | Hyper Rank | Hyper FDR Q-Val  | Hyper Fold Enrichment | Hyper Observed Gene Hits | Hyper Total Genes | Hyper Gene Set Coverage |
|--------------------------------------------------------------|------------|-------------------|------------------|-----------------------|----------------------------|---------------------------|------------|------------------|-----------------------|--------------------------|-------------------|-------------------------|
| <a href="#">abnormal craniofacial bone morphology</a>        | 56         | <b>1.8483e-9</b>  | <b>3.0266e-7</b> | 2.4212                | 57                         | 7.24%                     | 11         | <b>1.9860e-8</b> | 3.0387                | 46                       | 602               | 8.55%                   |
| <a href="#">abnormal axial skeleton morphology</a>           | 57         | <b>2.8223e-9</b>  | <b>4.5405e-7</b> | 2.0114                | 82                         | 10.42%                    | 10         | <b>2.0437e-8</b> | 2.3716                | 69                       | 1,157             | 12.83%                  |
| <a href="#">abnormal mouth morphology</a>                    | 58         | <b>3.8257e-9</b>  | <b>6.0485e-7</b> | 2.6751                | 46                         | 5.84%                     | 13         | <b>3.1437e-7</b> | 3.2911                | 36                       | 435               | 6.69%                   |
| <a href="#">abnormal esophageal smooth muscle morphology</a> | 59         | <b>2.8613e-8</b>  | <b>4.4471e-6</b> | 35.2635               | 6                          | 0.76%                     | 41         | <b>8.8457e-5</b> | 39.7677               | 4                        | 4                 | 0.74%                   |

The test set of 787 genomic regions picked 538 (3%) of all 21,395 genes. *Mouse Phenotype Single KO* has 9,170 terms covering 9,466 (44%) of all 21,395 genes, and 551,620 term - gene associations. 9,170 ontology terms (100%) were tested using an annotation count range of [1, Inf].

**Mouse Phenotype (20+ terms)**

Global controls

Table controls:  Shown top rows in this table:   Term annotation count: Min:  Max:   Visualize this table:

| Term Name                                                     | Binom Rank | Binom Raw P-Value | Binom FDR Q-Val   | Binom Fold Enrichment | Binom Observed Region Hits | Binom Region Set Coverage | Hyper Rank | Hyper FDR Q-Val   | Hyper Fold Enrichment | Hyper Observed Gene Hits | Hyper Total Genes | Hyper Gene Set Coverage |
|---------------------------------------------------------------|------------|-------------------|-------------------|-----------------------|----------------------------|---------------------------|------------|-------------------|-----------------------|--------------------------|-------------------|-------------------------|
| <a href="#">abnormal trachea morphology</a>                   | 14         | <b>9.6276e-51</b> | <b>6.5846e-48</b> | 15.5092               | 61                         | 7.75%                     | 242        | <b>1.5873e-2</b>  | 4.0214                | 9                        | 89                | 1.67%                   |
| <a href="#">abnormal digestive system morphology</a>          | 18         | <b>4.8410e-33</b> | <b>2.5751e-30</b> | 3.3387                | 130                        | 16.52%                    | 17         | <b>2.3039e-7</b>  | 2.3054                | 64                       | 1,104             | 11.90%                  |
| <a href="#">digestive/alimentary phenotype</a>                | 20         | <b>3.8211e-31</b> | <b>1.8294e-28</b> | 2.9982                | 141                        | 17.92%                    | 18         | <b>8.2531e-7</b>  | 2.0930                | 73                       | 1,387             | 13.57%                  |
| <a href="#">lethality during fetal growth through weaning</a> | 22         | <b>2.1712e-29</b> | <b>9.4496e-27</b> | 2.3459                | 193                        | 24.52%                    | 5          | <b>2.6591e-13</b> | 2.1310                | 124                      | 2,314             | 23.05%                  |
| <a href="#">abnormal brain development</a>                    | 25         | <b>1.6297e-28</b> | <b>6.2418e-26</b> | 3.5322                | 105                        | 13.34%                    | 77         | <b>1.6180e-4</b>  | 2.1736                | 44                       | 805               | 8.18%                   |
| <a href="#">abnormal respiratory system morphology</a>        | 29         | <b>4.7671e-25</b> | <b>1.5740e-22</b> | 3.1848                | 105                        | 13.34%                    | 65         | <b>8.6502e-5</b>  | 2.1086                | 50                       | 943               | 9.29%                   |
| <a href="#">postnatal lethality, incomplete penetrance</a>    | 30         | <b>1.2501e-24</b> | <b>3.9898e-22</b> | 3.3154                | 98                         | 12.45%                    | 123        | <b>1.2382e-3</b>  | 2.0280                | 41                       | 804               | 7.62%                   |
| <a href="#">abnormal nervous system development</a>           | 31         | <b>1.1887e-23</b> | <b>3.6716e-21</b> | 2.7189                | 124                        | 15.76%                    | 53         | <b>4.3969e-5</b>  | 1.9741                | 62                       | 1,249             | 11.52%                  |
| <a href="#">respiratory system phenotype</a>                  | 32         | <b>1.3662e-23</b> | <b>4.0880e-21</b> | 2.6326                | 130                        | 16.52%                    | 43         | <b>1.4269e-5</b>  | 1.9467                | 70                       | 1,430             | 13.01%                  |
| <a href="#">postnatal lethality</a>                           | 35         | <b>4.0381e-22</b> | <b>1.1047e-19</b> | 2.5671                | 127                        | 16.14%                    | 58         | <b>5.3420e-5</b>  | 1.9088                | 66                       | 1,375             | 12.27%                  |
| <a href="#">abnormal respiratory system physiology</a>        | 36         | <b>7.6612e-20</b> | <b>2.0377e-17</b> | 2.8871                | 95                         | 12.07%                    | 319        | <b>3.0685e-2</b>  | 1.6913                | 39                       | 917               | 7.25%                   |
| <a href="#">abnormal brain morphology</a>                     | 40         | <b>2.6930e-16</b> | <b>6.4464e-14</b> | 2.1337                | 131                        | 16.65%                    | 199        | <b>6.3061e-3</b>  | 1.5722                | 68                       | 1,720             | 12.64%                  |
| <a href="#">abnormal head morphology</a>                      | 43         | <b>8.1410e-15</b> | <b>1.8128e-12</b> | 2.5195                | 87                         | 11.05%                    | 2          | <b>2.7389e-13</b> | 3.0328                | 71                       | 931               | 13.20%                  |
| <a href="#">abnormal facial morphology</a>                    | 45         | <b>3.8650e-13</b> | <b>8.2238e-11</b> | 2.5691                | 74                         | 9.40%                     | 9          | <b>5.7930e-11</b> | 3.0309                | 58                       | 761               | 10.78%                  |
| <a href="#">abnormal craniofacial morphology</a>              | 46         | <b>1.1567e-12</b> | <b>2.4076e-10</b> | 2.2098                | 94                         | 11.94%                    | 6          | <b>7.0677e-12</b> | 2.6466                | 77                       | 1,157             | 14.31%                  |
| <a href="#">craniofacial phenotype</a>                        | 47         | <b>1.2888e-12</b> | <b>2.6256e-10</b> | 2.2054                | 94                         | 11.94%                    | 7          | <b>7.2856e-12</b> | 2.6375                | 77                       | 1,161             | 14.31%                  |
| <a href="#">abnormal palate morphology</a>                    | 48         | <b>1.5346e-12</b> | <b>3.0612e-10</b> | 3.4207                | 46                         | 5.84%                     | 11         | <b>1.3958e-8</b>  | 3.9889                | 33                       | 329               | 6.13%                   |
| <a href="#">abnormal mouth morphology</a>                     | 53         | <b>6.6388e-10</b> | <b>1.1994e-7</b>  | 2.5430                | 55                         | 6.99%                     | 16         | <b>1.6467e-7</b>  | 2.9986                | 42                       | 557               | 7.81%                   |
| <a href="#">abnormal autopod morphology</a>                   | 56         | <b>3.3224e-9</b>  | <b>5.6807e-7</b>  | 2.8444                | 42                         | 5.34%                     | 32         | <b>6.8015e-6</b>  | 3.1369                | 31                       | 393               | 5.76%                   |

| Term Name                          | Binom Rank | Binom Raw P-Value | Binom FDR Q-Val  | Binom Fold Enrichment | Binom Observed Region Hits | Binom Region Set Coverage | Hyper Rank | Hyper FDR Q-Val  | Hyper Fold Enrichment | Hyper Observed Gene Hits | Hyper Total Genes | Hyper Gene Set Coverage |
|------------------------------------|------------|-------------------|------------------|-----------------------|----------------------------|---------------------------|------------|------------------|-----------------------|--------------------------|-------------------|-------------------------|
| <b>abnormal cranium morphology</b> | 58         | <b>5.0886e-9</b>  | <b>8.4006e-7</b> | 2.2537                | 62                         | 7.88%                     | 12         | <b>1.8607e-8</b> | 2.8366                | 51                       | 715               | 9.48%                   |

The test set of 787 genomic regions picked 538 (3%) of all 21,395 genes.

*Mouse Phenotype* has 9,575 terms covering 9,654 (45%) of all 21,395 genes, and 705,265 term - gene associations. 9,575 ontology terms (100%) were tested using an annotation count range of [1, Inf].
