# Supplementary material for: AP-2α and AP-2β cooperatively function in the craniofacial surface ectoderm to regulate chromatin and gene expression dynamics during facial development
Source: eLife journal article supplement (doi:10.7554/elife.70511), 2022-03-25
Supplement: supp [file elife-70511-supp-v1.zip]

⊕ Job Description

⊕ Region-Genes Association Graphs

What do these graphs illustrate?

Number of associated genes per region

[Download as PDF.](#)

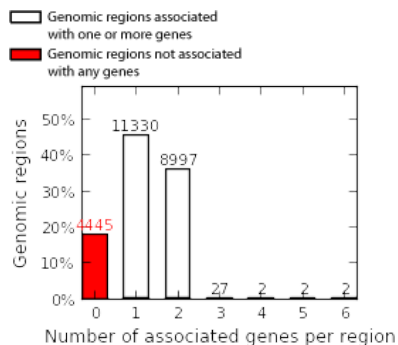

Binned by orientation and distance to TSS

[Download as PDF.](#)

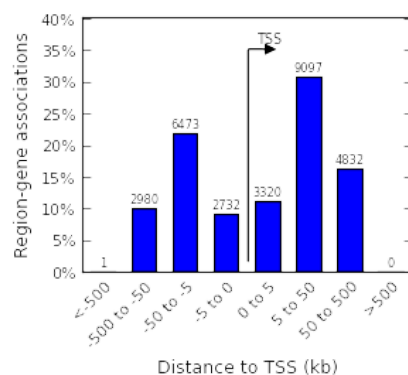

Binned by absolute distance to TSS

[Download as PDF.](#)

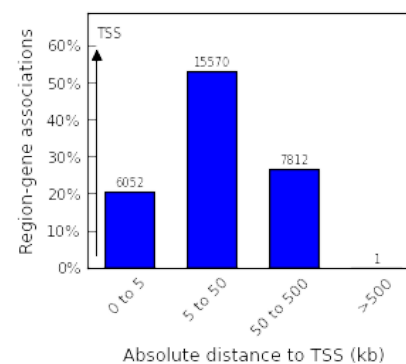

⊕ Global Controls

Global Export

Which data is exported by each option?

⊕ Ensembl Genes (no terms)

Global controls

⊖ GO Biological Process (20+ terms)

Global controls

Table controls:

Shown top rows in this table:

Term annotation count: Min:  Max:

Visualize this table:

| Term Name                                                      | Binom Rank | Binom Raw P-Value | Binom FDR Q-Val | Binom Fold Enrichment | Binom Observed Region Hits | Binom Region Set Coverage | Hyper Rank | Hyper FDR Q-Val | Hyper Fold Enrichment | Hyper Observed Gene Hits | Hyper Total Genes | Hyper Gene Set Coverage |
|----------------------------------------------------------------|------------|-------------------|-----------------|-----------------------|----------------------------|---------------------------|------------|-----------------|-----------------------|--------------------------|-------------------|-------------------------|
| <a href="#">single-multicellular organism process</a>          | 1          | 0.0000            | 0.0000          | 2.0001                | 10,420                     | 42.01%                    | 1          | 2.4473e-139     | 1.3017                | 3,475                    | 5,396             | 32.83%                  |
| <a href="#">multicellular organism development</a>             | 1          | 0.0000            | 0.0000          | 2.0657                | 9,621                      | 38.79%                    | 2          | 9.0450e-127     | 1.3137                | 3,069                    | 4,722             | 28.99%                  |
| <a href="#">anatomical structure development</a>               | 1          | 0.0000            | 0.0000          | 2.0346                | 9,980                      | 40.23%                    | 3          | 2.8168e-124     | 1.2978                | 3,236                    | 5,040             | 30.57%                  |
| <a href="#">single-organism developmental process</a>          | 1          | 0.0000            | 0.0000          | 2.0032                | 10,305                     | 41.54%                    | 4          | 1.8629e-122     | 1.2843                | 3,398                    | 5,348             | 32.10%                  |
| <a href="#">system development</a>                             | 1          | 0.0000            | 0.0000          | 2.0974                | 8,766                      | 35.34%                    | 7          | 3.6754e-113     | 1.3200                | 2,722                    | 4,168             | 25.72%                  |
| <a href="#">anatomical structure morphogenesis</a>             | 1          | 0.0000            | 0.0000          | 2.3402                | 5,498                      | 22.16%                    | 8          | 2.6350e-105     | 1.4590                | 1,500                    | 2,078             | 14.17%                  |
| <a href="#">cell differentiation</a>                           | 1          | 0.0000            | 0.0000          | 2.1221                | 7,523                      | 30.33%                    | 10         | 1.1261e-95      | 1.3273                | 2,297                    | 3,498             | 21.70%                  |
| <a href="#">regulation of multicellular organismal process</a> | 1          | 0.0000            | 0.0000          | 2.0663                | 5,943                      | 23.96%                    | 11         | 1.5412e-95      | 1.3783                | 1,850                    | 2,713             | 17.48%                  |
| <a href="#">cellular developmental process</a>                 | 1          | 0.0000            | 0.0000          | 2.1090                | 7,635                      | 30.78%                    | 12         | 7.9571e-94      | 1.3195                | 2,339                    | 3,583             | 22.10%                  |
| <a href="#">animal organ development</a>                       | 1          | 0.0000            | 0.0000          | 2.1695                | 6,916                      | 27.88%                    | 14         | 2.5174e-90      | 1.3410                | 2,058                    | 3,102             | 19.44%                  |

| Term Name                                          | Binom Rank | Binom Raw P-Value | Binom FDR Q-Val | Binom Fold Enrichment | Binom Observed Region Hits | Binom Region Set Coverage | Hyper Rank | Hyper FDR Q-Val | Hyper Fold Enrichment | Hyper Observed Gene Hits | Hyper Total Genes | Hyper Gene Set Coverage |
|----------------------------------------------------|------------|-------------------|-----------------|-----------------------|----------------------------|---------------------------|------------|-----------------|-----------------------|--------------------------|-------------------|-------------------------|
| tissue development                                 | 1          | 0.0000            | 0.0000          | 2.4020                | 4,330                      | 17.46%                    | 15         | 1.3586e-79      | 1.4565                | 1,171                    | 1,625             | 11.06%                  |
| nervous system development                         | 1          | 0.0000            | 0.0000          | 2.2183                | 5,305                      | 21.39%                    | 16         | 1.6188e-77      | 1.3856                | 1,493                    | 2,178             | 14.10%                  |
| regulation of developmental process                | 1          | 0.0000            | 0.0000          | 2.1940                | 5,630                      | 22.70%                    | 17         | 1.1891e-73      | 1.3580                | 1,601                    | 2,383             | 15.13%                  |
| neurogenesis                                       | 1          | 0.0000            | 0.0000          | 2.2714                | 4,027                      | 16.23%                    | 18         | 1.5015e-73      | 1.4522                | 1,105                    | 1,538             | 10.44%                  |
| regulation of signaling                            | 1          | 0.0000            | 0.0000          | 2.0223                | 6,271                      | 25.28%                    | 19         | 1.3925e-72      | 1.3059                | 2,008                    | 3,108             | 18.97%                  |
| regulation of cell communication                   | 1          | 0.0000            | 0.0000          | 2.0176                | 6,220                      | 25.08%                    | 20         | 3.0463e-72      | 1.3064                | 1,994                    | 3,085             | 18.84%                  |
| regulation of multicellular organismal development | 1          | 0.0000            | 0.0000          | 2.2143                | 4,417                      | 17.81%                    | 21         | 4.3188e-72      | 1.4129                | 1,254                    | 1,794             | 11.85%                  |
| positive regulation of metabolic process           | 1          | 0.0000            | 0.0000          | 2.0810                | 6,355                      | 25.62%                    | 23         | 1.9676e-67      | 1.2950                | 1,990                    | 3,106             | 18.80%                  |
| generation of neurons                              | 1          | 0.0000            | 0.0000          | 2.2925                | 3,805                      | 15.34%                    | 24         | 6.1038e-67      | 1.4507                | 1,017                    | 1,417             | 9.61%                   |
| animal organ morphogenesis                         | 1          | 0.0000            | 0.0000          | 2.6123                | 3,002                      | 12.10%                    | 26         | 6.7155e-66      | 1.5443                | 735                      | 962               | 6.94%                   |

The test set of 24,805 genomic regions picked 10,585 (49%) of all 21,395 genes.  
 GO Biological Process has 13,090 terms covering 17,925 (84%) of all 21,395 genes, and 1,163,819 term - gene associations.  
 13,090 ontology terms (100%) were tested using an annotation count range of [1, Inf].

GO Cellular Component (20+ terms)

Global controls

Table controls:  Shown top rows in this table:   Term annotation count: Min:  Max:   Visualize this table:

| Term Name                        | Binom Rank | Binom Raw P-Value | Binom FDR Q-Val | Binom Fold Enrichment | Binom Observed Region Hits | Binom Region Set Coverage | Hyper Rank | Hyper FDR Q-Val | Hyper Fold Enrichment | Hyper Observed Gene Hits | Hyper Total Genes | Hyper Gene Set Coverage |
|----------------------------------|------------|-------------------|-----------------|-----------------------|----------------------------|---------------------------|------------|-----------------|-----------------------|--------------------------|-------------------|-------------------------|
| anchoring junction               | 44         | 1.1968e-173       | 4.6077e-172     | 2.3923                | 1,316                      | 5.31%                     | 30         | 4.3661e-22      | 1.4327                | 370                      | 522               | 3.50%                   |
| adherens junction                | 46         | 3.8450e-162       | 1.4160e-160     | 2.3630                | 1,260                      | 5.08%                     | 32         | 7.0055e-20      | 1.4185                | 353                      | 503               | 3.33%                   |
| transcription factor complex     | 48         | 7.2550e-142       | 2.5604e-140     | 2.4867                | 1,002                      | 4.04%                     | 72         | 7.8103e-11      | 1.3566                | 249                      | 371               | 2.35%                   |
| cell-cell junction               | 51         | 1.2686e-134       | 4.2137e-133     | 2.2404                | 1,169                      | 4.71%                     | 31         | 2.6072e-21      | 1.4532                | 330                      | 459               | 3.12%                   |
| actin cytoskeleton               | 59         | 1.0631e-124       | 3.0523e-123     | 2.2776                | 1,047                      | 4.22%                     | 33         | 1.3543e-19      | 1.4386                | 321                      | 451               | 3.03%                   |
| focal adhesion                   | 60         | 2.4568e-122       | 6.9363e-121     | 2.3881                | 934                        | 3.77%                     | 62         | 3.4409e-12      | 1.3719                | 262                      | 386               | 2.48%                   |
| cell-substrate adherens junction | 63         | 7.6843e-121       | 2.0662e-119     | 2.3706                | 936                        | 3.77%                     | 66         | 6.6771e-12      | 1.3647                | 264                      | 391               | 2.49%                   |
| cell-substrate junction          | 64         | 1.6481e-119       | 4.3623e-118     | 2.3486                | 943                        | 3.80%                     | 65         | 6.3816e-12      | 1.3628                | 267                      | 396               | 2.52%                   |
| cell body                        | 70         | 3.1652e-100       | 7.6597e-99      | 2.0183                | 1,107                      | 4.46%                     | 49         | 8.4962e-16      | 1.3671                | 349                      | 516               | 3.30%                   |
| extracellular matrix             | 71         | 9.1001e-99        | 2.1712e-97      | 2.0050                | 1,109                      | 4.47%                     | 50         | 1.2318e-15      | 1.3589                | 359                      | 534               | 3.39%                   |
| cell leading edge                | 72         | 2.8389e-95        | 6.6792e-94      | 2.1694                | 889                        | 3.58%                     | 67         | 7.5375e-12      | 1.3771                | 248                      | 364               | 2.34%                   |
| neuronal cell body               | 76         | 1.8748e-88        | 4.1788e-87      | 2.0213                | 974                        | 3.93%                     | 53         | 1.0770e-13      | 1.3688                | 300                      | 443               | 2.83%                   |
| axon                             | 77         | 8.3800e-88        | 1.8436e-86      | 2.0045                | 987                        | 3.98%                     | 34         | 1.4595e-19      | 1.4471                | 310                      | 433               | 2.93%                   |

| Term Name                       | Binom Rank | Binom Raw P-Value | Binom FDR Q-Val | Binom Fold Enrichment | Binom Observed Region Hits | Binom Region Set Coverage | Hyper Rank | Hyper FDR Q-Val | Hyper Fold Enrichment | Hyper Observed Gene Hits | Hyper Total Genes | Hyper Gene Set Coverage |
|---------------------------------|------------|-------------------|-----------------|-----------------------|----------------------------|---------------------------|------------|-----------------|-----------------------|--------------------------|-------------------|-------------------------|
| cell projection membrane        | 83         | 1.9502e-74        | 3.9803e-73      | 2.2394                | 647                        | 2.61%                     | 106        | 1.7782e-7       | 1.3378                | 184                      | 278               | 1.74%                   |
| membrane raft                   | 88         | 2.2844e-68        | 4.3974e-67      | 2.0767                | 704                        | 2.84%                     | 46         | 2.7629e-17      | 1.4963                | 228                      | 308               | 2.15%                   |
| cytoplasmic region              | 89         | 3.2257e-68        | 6.1397e-67      | 2.0674                | 710                        | 2.86%                     | 102        | 1.2621e-7       | 1.3129                | 215                      | 331               | 2.03%                   |
| cell cortex                     | 91         | 5.2806e-67        | 9.8300e-66      | 2.1655                | 626                        | 2.52%                     | 121        | 2.3952e-6       | 1.3127                | 176                      | 271               | 1.66%                   |
| extrinsic component of membrane | 98         | 1.2844e-60        | 2.2201e-59      | 2.1254                | 590                        | 2.38%                     | 73         | 1.3188e-10      | 1.4119                | 190                      | 272               | 1.79%                   |
| ruffle                          | 99         | 1.9145e-59        | 3.2760e-58      | 2.4261                | 437                        | 1.76%                     | 148        | 4.7796e-4       | 1.3144                | 106                      | 163               | 1.00%                   |
| apical plasma membrane          | 100        | 2.0046e-59        | 3.3957e-58      | 2.0117                | 660                        | 2.66%                     | 57         | 6.0984e-13      | 1.4351                | 213                      | 300               | 2.01%                   |

The test set of 24,805 genomic regions picked 10,585 (49%) of all 21,395 genes.  
 GO Cellular Component has 1,694 terms covering 19,074 (89%) of all 21,395 genes, and 371,380 term - gene associations.  
 1,694 ontology terms (100%) were tested using an annotation count range of [1, Inf].

GO Molecular Function (20+ terms)

Global controls

Table controls:  Shown top rows in this table:   Term annotation count: Min:  Max:   Visualize this table:

| Term Name                                                                      | Binom Rank | Binom Raw P-Value | Binom FDR Q-Val | Binom Fold Enrichment | Binom Observed Region Hits | Binom Region Set Coverage | Hyper Rank | Hyper FDR Q-Val | Hyper Fold Enrichment | Hyper Observed Gene Hits | Hyper Total Genes | Hyper Gene Set Coverage |
|--------------------------------------------------------------------------------|------------|-------------------|-----------------|-----------------------|----------------------------|---------------------------|------------|-----------------|-----------------------|--------------------------|-------------------|-------------------------|
| sequence-specific DNA binding                                                  | 1          | 0.0000            | 0.0000          | 2.7571                | 3,118                      | 12.57%                    | 3          | 3.3153e-49      | 1.4516                | 767                      | 1,068             | 7.25%                   |
| RNA polymerase II transcription factor activity, sequence-specific DNA binding | 1          | 0.0000            | 0.0000          | 2.7562                | 2,390                      | 9.64%                     | 4          | 3.2749e-48      | 1.5278                | 579                      | 766               | 5.47%                   |
| transcription regulatory region DNA binding                                    | 1          | 0.0000            | 0.0000          | 2.7293                | 2,648                      | 10.68%                    | 5          | 2.5564e-46      | 1.4797                | 653                      | 892               | 6.17%                   |
| regulatory region DNA binding                                                  | 1          | 0.0000            | 0.0000          | 2.7281                | 2,650                      | 10.68%                    | 6          | 2.7101e-46      | 1.4786                | 654                      | 894               | 6.18%                   |
| RNA polymerase II regulatory region DNA binding                                | 1          | 0.0000            | 0.0000          | 2.8352                | 2,072                      | 8.35%                     | 7          | 4.6393e-46      | 1.5550                | 507                      | 659               | 4.79%                   |
| RNA polymerase II regulatory region sequence-specific DNA binding              | 1          | 0.0000            | 0.0000          | 2.8489                | 2,070                      | 8.35%                     | 8          | 4.5715e-46      | 1.5560                | 505                      | 656               | 4.77%                   |
| transcription regulatory region sequence-specific DNA binding                  | 1          | 0.0000            | 0.0000          | 2.7753                | 2,263                      | 9.12%                     | 9          | 2.6241e-45      | 1.5194                | 557                      | 741               | 5.26%                   |
| sequence-specific double-stranded DNA binding                                  | 1          | 0.0000            | 0.0000          | 2.7241                | 2,303                      | 9.28%                     | 10         | 2.0639e-41      | 1.4866                | 570                      | 775               | 5.38%                   |
| double-stranded DNA binding                                                    | 1          | 0.0000            | 0.0000          | 2.6378                | 2,373                      | 9.57%                     | 12         | 1.3160e-36      | 1.4380                | 604                      | 849               | 5.71%                   |
| transcription factor activity, sequence-specific DNA binding                   | 1          | 0.0000            | 0.0000          | 2.4487                | 2,905                      | 11.71%                    | 18         | 1.7001e-26      | 1.3190                | 755                      | 1,157             | 7.13%                   |
| enzyme binding                                                                 | 1          | 0.0000            | 0.0000          | 2.0282                | 3,605                      | 14.53%                    | 19         | 1.9478e-26      | 1.2430                | 1,182                    | 1,922             | 11.17%                  |
| DNA binding                                                                    | 1          | 0.0000            | 0.0000          | 2.2651                | 4,365                      | 17.60%                    | 22         | 1.0928e-23      | 1.2187                | 1,271                    | 2,108             | 12.01%                  |
| macromolecular complex binding                                                 | 19         | 2.7995e-315       | 6.0866e-313     | 2.1242                | 2,971                      | 11.98%                    | 27         | 5.5151e-19      | 1.2373                | 906                      | 1,480             | 8.56%                   |

| Term Name                                                                                                                       | Binom Rank | Binom Raw P-Value  | Binom FDR Q-Val    | Binom Fold Enrichment | Binom Observed Region Hits | Binom Region Set Coverage | Hyper Rank | Hyper FDR Q-Val   | Hyper Fold Enrichment | Hyper Observed Gene Hits | Hyper Total Genes | Hyper Gene Set Coverage |
|---------------------------------------------------------------------------------------------------------------------------------|------------|--------------------|--------------------|-----------------------|----------------------------|---------------------------|------------|-------------------|-----------------------|--------------------------|-------------------|-------------------------|
| <a href="#">transcription factor activity, RNA polymerase II core promoter proximal region sequence-specific binding</a>        | 23         | <b>2.6800e-264</b> | <b>4.8136e-262</b> | 2.8965                | 1,430                      | 5.76%                     | 13         | <b>8.0953e-35</b> | 1.6018                | 336                      | 424               | 3.17%                   |
| <a href="#">transcriptional activator activity, RNA polymerase II transcription regulatory region sequence-specific binding</a> | 24         | <b>2.9772e-245</b> | <b>5.1245e-243</b> | 2.8222                | 1,384                      | 5.58%                     | 11         | <b>3.6409e-37</b> | 1.6247                | 336                      | 418               | 3.17%                   |
| <a href="#">core promoter proximal region DNA binding</a>                                                                       | 26         | <b>3.5868e-222</b> | <b>5.6989e-220</b> | 2.7823                | 1,285                      | 5.18%                     | 15         | <b>3.5019e-28</b> | 1.5556                | 314                      | 408               | 2.97%                   |
| <a href="#">core promoter proximal region sequence-specific DNA binding</a>                                                     | 27         | <b>1.2043e-216</b> | <b>1.8426e-214</b> | 2.7681                | 1,264                      | 5.10%                     | 16         | <b>1.2785e-27</b> | 1.5521                | 311                      | 405               | 2.94%                   |
| <a href="#">RNA polymerase II core promoter proximal region sequence-specific DNA binding</a>                                   | 28         | <b>2.7077e-216</b> | <b>3.9948e-214</b> | 2.8013                | 1,238                      | 4.99%                     | 14         | <b>7.8696e-29</b> | 1.5727                | 305                      | 392               | 2.88%                   |
| <a href="#">protein domain specific binding</a>                                                                                 | 33         | <b>3.7764e-196</b> | <b>4.7274e-194</b> | 2.2821                | 1,627                      | 6.56%                     | 25         | <b>7.3318e-20</b> | 1.3551                | 478                      | 713               | 4.52%                   |
| <a href="#">transcription factor binding</a>                                                                                    | 34         | <b>1.7449e-190</b> | <b>2.1201e-188</b> | 2.4270                | 1,402                      | 5.65%                     | 34         | <b>1.5462e-14</b> | 1.3439                | 373                      | 561               | 3.52%                   |

The test set of 24,805 genomic regions picked 10,585 (49%) of all 21,395 genes. GO Molecular Function has 4,131 terms covering 17,189 (80%) of all 21,395 genes, and 227,341 term - gene associations. 4,131 ontology terms (100%) were tested using an annotation count range of [1, Inf].

Human Phenotype (20+ terms)

Global controls

Table controls:  Shown top rows in this table:   Term annotation count: Min:  Max:   Visualize this table:

| Term Name                                                       | Binom Rank | Binom Raw P-Value  | Binom FDR Q-Val    | Binom Fold Enrichment | Binom Observed Region Hits | Binom Region Set Coverage | Hyper Rank | Hyper FDR Q-Val   | Hyper Fold Enrichment | Hyper Observed Gene Hits | Hyper Total Genes | Hyper Gene Set Coverage |
|-----------------------------------------------------------------|------------|--------------------|--------------------|-----------------------|----------------------------|---------------------------|------------|-------------------|-----------------------|--------------------------|-------------------|-------------------------|
| <a href="#">Autosomal dominant inheritance</a>                  | 1          | <b>2.8691e-313</b> | <b>1.8933e-309</b> | 2.1284                | 2,941                      | 11.86%                    | 1          | <b>5.8139e-42</b> | 1.3812                | 889                      | 1,301             | 8.40%                   |
| <a href="#">Abnormality of the integument</a>                   | 9          | <b>6.5918e-202</b> | <b>4.8333e-199</b> | 2.0164                | 2,195                      | 8.85%                     | 10         | <b>5.1793e-15</b> | 1.2523                | 684                      | 1,104             | 6.46%                   |
| <a href="#">Abnormality of the mouth</a>                        | 11         | <b>4.4709e-190</b> | <b>2.6822e-187</b> | 2.0715                | 1,945                      | 7.84%                     | 9          | <b>1.8223e-15</b> | 1.2852                | 571                      | 898               | 5.39%                   |
| <a href="#">Abnormality of the oral cavity</a>                  | 16         | <b>3.6164e-175</b> | <b>1.4915e-172</b> | 2.1466                | 1,659                      | 6.69%                     | 11         | <b>1.3645e-14</b> | 1.3079                | 473                      | 731               | 4.47%                   |
| <a href="#">Abnormality of the orbital region</a>               | 21         | <b>2.9844e-158</b> | <b>9.3783e-156</b> | 2.0143                | 1,741                      | 7.02%                     | 15         | <b>4.9969e-12</b> | 1.2639                | 514                      | 822               | 4.86%                   |
| <a href="#">Abnormal appendicular skeleton morphology</a>       | 26         | <b>1.2439e-140</b> | <b>3.1571e-138</b> | 2.0014                | 1,577                      | 6.36%                     | 22         | <b>3.3669e-10</b> | 1.2518                | 475                      | 767               | 4.49%                   |
| <a href="#">Abnormality of cardiovascular system morphology</a> | 27         | <b>1.2376e-131</b> | <b>3.0249e-129</b> | 2.0330                | 1,423                      | 5.74%                     | 46         | <b>3.5994e-8</b>  | 1.2307                | 439                      | 721               | 4.15%                   |
| <a href="#">Abnormality of the nose</a>                         | 31         | <b>2.9773e-130</b> | <b>6.3379e-128</b> | 2.0151                | 1,439                      | 5.80%                     | 51         | <b>7.4452e-8</b>  | 1.2302                | 423                      | 695               | 4.00%                   |
| <a href="#">Abnormality of digit</a>                            | 34         | <b>1.1253e-123</b> | <b>2.1840e-121</b> | 2.0481                | 1,315                      | 5.30%                     | 27         | <b>2.4949e-9</b>  | 1.2725                | 379                      | 602               | 3.58%                   |
| <a href="#">Abnormality of skin adnexa morphology</a>           | 35         | <b>3.5042e-121</b> | <b>6.6070e-119</b> | 2.0636                | 1,266                      | 5.10%                     | 56         | <b>2.0062e-7</b>  | 1.2410                | 369                      | 601               | 3.49%                   |
| <a href="#">Abnormality of the palate</a>                       | 36         | <b>1.3281e-119</b> | <b>2.4345e-117</b> | 2.2716                | 1,010                      | 4.07%                     | 25         | <b>1.5270e-9</b>  | 1.3344                | 272                      | 412               | 2.57%                   |

| Term Name                                                                | Binom Rank | Binom Raw P-Value  | Binom FDR Q-Val    | Binom Fold Enrichment | Binom Observed Region Hits | Binom Region Set Coverage | Hyper Rank | Hyper FDR Q-Val   | Hyper Fold Enrichment | Hyper Observed Gene Hits | Hyper Total Genes | Hyper Gene Set Coverage |
|--------------------------------------------------------------------------|------------|--------------------|--------------------|-----------------------|----------------------------|---------------------------|------------|-------------------|-----------------------|--------------------------|-------------------|-------------------------|
| <a href="#">Aplasia/hypoplasia affecting bones of the axial skeleton</a> | 40         | <b>2.2350e-117</b> | <b>3.6871e-115</b> | 2.3967                | 890                        | 3.59%                     | 47         | <b>4.1593e-8</b>  | 1.3270                | 237                      | 361               | 2.24%                   |
| <a href="#">Abnormal morphology of the ocular adnexa</a>                 | 41         | <b>3.2782e-116</b> | <b>5.2763e-114</b> | 2.0391                | 1,250                      | 5.04%                     | 30         | <b>3.3823e-9</b>  | 1.2732                | 371                      | 589               | 3.50%                   |
| <a href="#">Abnormal heart morphology</a>                                | 43         | <b>7.2568e-116</b> | <b>1.1137e-113</b> | 2.0588                | 1,218                      | 4.91%                     | 74         | <b>9.4583e-7</b>  | 1.2259                | 373                      | 615               | 3.52%                   |
| <a href="#">Abnormality of the dentition</a>                             | 45         | <b>2.5972e-115</b> | <b>3.8086e-113</b> | 2.2898                | 958                        | 3.86%                     | 62         | <b>4.4710e-7</b>  | 1.3017                | 237                      | 368               | 2.24%                   |
| <a href="#">Abnormality of the gastrointestinal tract</a>                | 46         | <b>3.8034e-115</b> | <b>5.4562e-113</b> | 2.0715                | 1,193                      | 4.81%                     | 34         | <b>6.5531e-9</b>  | 1.2770                | 350                      | 554               | 3.31%                   |
| <a href="#">Abnormality of connective tissue</a>                         | 47         | <b>7.4816e-115</b> | <b>1.0504e-112</b> | 2.0804                | 1,178                      | 4.75%                     | 23         | <b>4.6271e-10</b> | 1.2935                | 359                      | 561               | 3.39%                   |
| <a href="#">Abnormality of the vasculature</a>                           | 50         | <b>8.5108e-110</b> | <b>1.1233e-107</b> | 2.0841                | 1,122                      | 4.52%                     | 40         | <b>1.9764e-8</b>  | 1.2702                | 345                      | 549               | 3.26%                   |
| <a href="#">Aplasia/hypoplasia involving the skeleton</a>                | 52         | <b>8.8742e-109</b> | <b>1.1262e-106</b> | 2.0871                | 1,108                      | 4.47%                     | 48         | <b>6.0122e-8</b>  | 1.2712                | 322                      | 512               | 3.04%                   |
| <a href="#">Abnormal reproductive system morphology</a>                  | 54         | <b>3.4735e-107</b> | <b>4.2448e-105</b> | 2.0163                | 1,186                      | 4.78%                     | 149        | <b>5.9925e-5</b>  | 1.2044                | 317                      | 532               | 2.99%                   |

The test set of 24,805 genomic regions picked 10,585 (49%) of all 21,395 genes. *Human Phenotype* has 6,599 terms covering 3,215 (15%) of all 21,395 genes, and 244,972 term - gene associations. 6,599 ontology terms (100%) were tested using an annotation count range of [1, Inf].

**Mouse Phenotype Single KO (20+ terms)**

Global controls

Table controls:  Shown top rows in this table:   Term annotation count: Min:  Max:   Visualize this table:

| Term Name                                                     | Binom Rank | Binom Raw P-Value | Binom FDR Q-Val | Binom Fold Enrichment | Binom Observed Region Hits | Binom Region Set Coverage | Hyper Rank | Hyper FDR Q-Val   | Hyper Fold Enrichment | Hyper Observed Gene Hits | Hyper Total Genes | Hyper Gene Set Coverage |
|---------------------------------------------------------------|------------|-------------------|-----------------|-----------------------|----------------------------|---------------------------|------------|-------------------|-----------------------|--------------------------|-------------------|-------------------------|
| <a href="#">nervous system phenotype</a>                      | 1          | <b>0.0000</b>     | <b>0.0000</b>   | 2.0198                | 6,250                      | 25.20%                    | 1          | <b>2.4017e-99</b> | 1.3777                | 1,933                    | 2,836             | 18.26%                  |
| <a href="#">lethality during fetal growth through weaning</a> | 1          | <b>0.0000</b>     | <b>0.0000</b>   | 2.2636                | 4,591                      | 18.51%                    | 6          | <b>4.0579e-81</b> | 1.4424                | 1,256                    | 1,760             | 11.87%                  |
| <a href="#">preweaning lethality</a>                          | 1          | <b>0.0000</b>     | <b>0.0000</b>   | 2.0297                | 7,228                      | 29.14%                    | 8          | <b>8.4757e-80</b> | 1.2957                | 2,291                    | 3,574             | 21.64%                  |
| <a href="#">abnormal nervous system morphology</a>            | 1          | <b>0.0000</b>     | <b>0.0000</b>   | 2.1284                | 5,237                      | 21.11%                    | 9          | <b>7.1345e-79</b> | 1.3841                | 1,527                    | 2,230             | 14.43%                  |
| <a href="#">cardiovascular system phenotype</a>               | 1          | <b>0.0000</b>     | <b>0.0000</b>   | 2.0038                | 4,855                      | 19.57%                    | 12         | <b>5.1338e-65</b> | 1.3469                | 1,506                    | 2,260             | 14.23%                  |
| <a href="#">skeleton phenotype</a>                            | 1          | <b>0.0000</b>     | <b>0.0000</b>   | 2.0889                | 4,309                      | 17.37%                    | 14         | <b>5.4533e-58</b> | 1.3576                | 1,295                    | 1,928             | 12.23%                  |
| <a href="#">abnormal skeleton morphology</a>                  | 1          | <b>0.0000</b>     | <b>0.0000</b>   | 2.1029                | 4,150                      | 16.73%                    | 18         | <b>4.5641e-55</b> | 1.3582                | 1,231                    | 1,832             | 11.63%                  |
| <a href="#">perinatal lethality</a>                           | 1          | <b>0.0000</b>     | <b>0.0000</b>   | 2.3825                | 2,795                      | 11.27%                    | 21         | <b>3.3852e-54</b> | 1.4908                | 725                      | 983               | 6.85%                   |
| <a href="#">abnormal brain morphology</a>                     | 1          | <b>0.0000</b>     | <b>0.0000</b>   | 2.1793                | 3,392                      | 13.67%                    | 27         | <b>5.4929e-50</b> | 1.3996                | 941                      | 1,359             | 8.89%                   |
| <a href="#">abnormal cardiovascular system morphology</a>     | 1          | <b>0.0000</b>     | <b>0.0000</b>   | 2.0816                | 3,851                      | 15.53%                    | 30         | <b>1.1038e-47</b> | 1.3459                | 1,138                    | 1,709             | 10.75%                  |
| <a href="#">abnormal axial skeleton morphology</a>            | 1          | <b>0.0000</b>     | <b>0.0000</b>   | 2.2849                | 2,936                      | 11.84%                    | 39         | <b>2.1698e-41</b> | 1.3958                | 799                      | 1,157             | 7.55%                   |
| <a href="#">vision/eye phenotype</a>                          | 1          | <b>0.0000</b>     | <b>0.0000</b>   | 2.2103                | 3,254                      | 13.12%                    | 41         | <b>5.1436e-41</b> | 1.3624                | 916                      | 1,359             | 8.65%                   |
| <a href="#">abnormal eye morphology</a>                       | 1          | <b>0.0000</b>     | <b>0.0000</b>   | 2.2631                | 3,093                      | 12.47%                    | 42         | <b>5.3812e-39</b> | 1.3690                | 848                      | 1,252             | 8.01%                   |
| <a href="#">embryo phenotype</a>                              | 1          | <b>0.0000</b>     | <b>0.0000</b>   | 2.1980                | 3,554                      | 14.33%                    | 66         | <b>1.1045e-28</b> | 1.2838                | 980                      | 1,543             | 9.26%                   |

| Term Name                                           | Binom Rank | Binom Raw P-Value  | Binom FDR Q-Val    | Binom Fold Enrichment | Binom Observed Region Hits | Binom Region Set Coverage | Hyper Rank | Hyper FDR Q-Val   | Hyper Fold Enrichment | Hyper Observed Gene Hits | Hyper Total Genes | Hyper Gene Set Coverage |
|-----------------------------------------------------|------------|--------------------|--------------------|-----------------------|----------------------------|---------------------------|------------|-------------------|-----------------------|--------------------------|-------------------|-------------------------|
| <a href="#">abnormal embryo morphology</a>          | 1          | <b>0.0000</b>      | <b>0.0000</b>      | 2.2514                | 2,839                      | 11.45%                    | 98         | <b>5.3992e-24</b> | 1.2997                | 753                      | 1,171             | 7.11%                   |
| <a href="#">craniofacial phenotype</a>              | 37         | <b>1.0672e-321</b> | <b>2.6449e-319</b> | 2.2965                | 2,582                      | 10.41%                    | 50         | <b>2.7947e-37</b> | 1.4134                | 672                      | 961               | 6.35%                   |
| <a href="#">abnormal craniofacial morphology</a>    | 38         | <b>6.4130e-321</b> | <b>1.5476e-318</b> | 2.2966                | 2,576                      | 10.39%                    | 52         | <b>4.7118e-37</b> | 1.4130                | 669                      | 957               | 6.32%                   |
| <a href="#">abnormal nervous system development</a> | 41         | <b>4.5886e-309</b> | <b>1.0263e-306</b> | 2.2738                | 2,535                      | 10.22%                    | 46         | <b>1.2492e-37</b> | 1.4166                | 670                      | 956               | 6.33%                   |
| <a href="#">digestive/alimentary phenotype</a>      | 42         | <b>8.2277e-308</b> | <b>1.7964e-305</b> | 2.2508                | 2,577                      | 10.39%                    | 53         | <b>5.4517e-37</b> | 1.3921                | 728                      | 1,057             | 6.88%                   |
| <a href="#">integument phenotype</a>                | 43         | <b>5.2598e-304</b> | <b>1.1217e-301</b> | 2.0038                | 3,270                      | 13.18%                    | 40         | <b>4.1423e-41</b> | 1.3401                | 1,019                    | 1,537             | 9.63%                   |

The test set of 24,805 genomic regions picked 10,585 (49%) of all 21,395 genes.  
 Mouse Phenotype Single KO has 9,170 terms covering 9,466 (44%) of all 21,395 genes, and 551,620 term - gene associations.  
 9,170 ontology terms (100%) were tested using an annotation count range of [1, Inf].

**Mouse Phenotype (20+ terms)**

Global controls

Table controls:  Shown top rows in this table:   Term annotation count: Min:  Max:   Visualize this table:

| Term Name                                                     | Binom Rank | Binom Raw P-Value | Binom FDR Q-Val | Binom Fold Enrichment | Binom Observed Region Hits | Binom Region Set Coverage | Hyper Rank | Hyper FDR Q-Val    | Hyper Fold Enrichment | Hyper Observed Gene Hits | Hyper Total Genes | Hyper Gene Set Coverage |
|---------------------------------------------------------------|------------|-------------------|-----------------|-----------------------|----------------------------|---------------------------|------------|--------------------|-----------------------|--------------------------|-------------------|-------------------------|
| <a href="#">nervous system phenotype</a>                      | 1          | <b>0.0000</b>     | <b>0.0000</b>   | 2.0178                | 7,247                      | 29.22%                    | 1          | <b>5.4564e-118</b> | 1.3728                | 2,278                    | 3,354             | 21.52%                  |
| <a href="#">preweaning lethality</a>                          | 1          | <b>0.0000</b>     | <b>0.0000</b>   | 2.0169                | 8,080                      | 32.57%                    | 6          | <b>6.3495e-98</b>  | 1.3034                | 2,611                    | 4,049             | 24.67%                  |
| <a href="#">abnormal nervous system morphology</a>            | 1          | <b>0.0000</b>     | <b>0.0000</b>   | 2.1077                | 6,259                      | 25.23%                    | 7          | <b>2.5688e-97</b>  | 1.3800                | 1,868                    | 2,736             | 17.65%                  |
| <a href="#">lethality during fetal growth through weaning</a> | 1          | <b>0.0000</b>     | <b>0.0000</b>   | 2.1916                | 5,683                      | 22.91%                    | 9          | <b>3.9913e-96</b>  | 1.4142                | 1,619                    | 2,314             | 15.30%                  |
| <a href="#">cardiovascular system phenotype</a>               | 1          | <b>0.0000</b>     | <b>0.0000</b>   | 2.0191                | 5,626                      | 22.68%                    | 12         | <b>2.1219e-82</b>  | 1.3588                | 1,760                    | 2,618             | 16.63%                  |
| <a href="#">skeleton phenotype</a>                            | 1          | <b>0.0000</b>     | <b>0.0000</b>   | 2.0935                | 4,916                      | 19.82%                    | 14         | <b>5.7776e-73</b>  | 1.3716                | 1,497                    | 2,206             | 14.14%                  |
| <a href="#">perinatal lethality</a>                           | 1          | <b>0.0000</b>     | <b>0.0000</b>   | 2.3141                | 3,636                      | 14.66%                    | 15         | <b>1.0290e-70</b>  | 1.4760                | 980                      | 1,342             | 9.26%                   |
| <a href="#">abnormal skeleton morphology</a>                  | 1          | <b>0.0000</b>     | <b>0.0000</b>   | 2.1000                | 4,721                      | 19.03%                    | 19         | <b>1.3892e-68</b>  | 1.3707                | 1,420                    | 2,094             | 13.42%                  |
| <a href="#">abnormal cardiovascular system morphology</a>     | 1          | <b>0.0000</b>     | <b>0.0000</b>   | 2.1081                | 4,671                      | 18.83%                    | 22         | <b>4.3602e-65</b>  | 1.3645                | 1,390                    | 2,059             | 13.13%                  |
| <a href="#">abnormal brain morphology</a>                     | 1          | <b>0.0000</b>     | <b>0.0000</b>   | 2.1813                | 4,221                      | 17.02%                    | 24         | <b>9.8089e-64</b>  | 1.3973                | 1,189                    | 1,720             | 11.23%                  |
| <a href="#">muscle phenotype</a>                              | 1          | <b>0.0000</b>     | <b>0.0000</b>   | 2.1167                | 3,461                      | 13.95%                    | 25         | <b>1.5579e-61</b>  | 1.4261                | 1,028                    | 1,457             | 9.71%                   |
| <a href="#">abnormal neuron morphology</a>                    | 1          | <b>0.0000</b>     | <b>0.0000</b>   | 2.1135                | 3,696                      | 14.90%                    | 30         | <b>5.5625e-58</b>  | 1.3999                | 1,077                    | 1,555             | 10.17%                  |
| <a href="#">neonatal lethality</a>                            | 1          | <b>0.0000</b>     | <b>0.0000</b>   | 2.3326                | 2,770                      | 11.17%                    | 32         | <b>5.3319e-57</b>  | 1.4996                | 736                      | 992               | 6.95%                   |
| <a href="#">abnormal cardiovascular system physiology</a>     | 1          | <b>0.0000</b>     | <b>0.0000</b>   | 2.0101                | 3,632                      | 14.64%                    | 34         | <b>1.4099e-55</b>  | 1.3813                | 1,118                    | 1,636             | 10.56%                  |
| <a href="#">vision/eye phenotype</a>                          | 1          | <b>0.0000</b>     | <b>0.0000</b>   | 2.2196                | 3,859                      | 15.56%                    | 35         | <b>1.6325e-54</b>  | 1.3830                | 1,090                    | 1,593             | 10.30%                  |
| <a href="#">abnormal eye morphology</a>                       | 1          | <b>0.0000</b>     | <b>0.0000</b>   | 2.2657                | 3,675                      | 14.82%                    | 37         | <b>1.1838e-52</b>  | 1.3911                | 1,020                    | 1,482             | 9.64%                   |
| <a href="#">abnormal axial skeleton morphology</a>            | 1          | <b>0.0000</b>     | <b>0.0000</b>   | 2.2751                | 3,411                      | 13.75%                    | 39         | <b>3.9310e-51</b>  | 1.4036                | 943                      | 1,358             | 8.91%                   |
| <a href="#">digestive/alimentary phenotype</a>                | 1          | <b>0.0000</b>     | <b>0.0000</b>   | 2.2263                | 3,300                      | 13.30%                    | 40         | <b>2.4669e-50</b>  | 1.3961                | 958                      | 1,387             | 9.05%                   |

| Term Name                        | Binom Rank | Binom Raw P-Value | Binom FDR Q-Val | Binom Fold Enrichment | Binom Observed Region Hits | Binom Region Set Coverage | Hyper Rank | Hyper FDR Q-Val   | Hyper Fold Enrichment | Hyper Observed Gene Hits | Hyper Total Genes | Hyper Gene Set Coverage |
|----------------------------------|------------|-------------------|-----------------|-----------------------|----------------------------|---------------------------|------------|-------------------|-----------------------|--------------------------|-------------------|-------------------------|
| <b>abnormal heart morphology</b> | 1          | <b>0.0000</b>     | <b>0.0000</b>   | 2.1154                | 3,401                      | 13.71%                    | 45         | <b>8.8750e-49</b> | 1.3771                | 1,007                    | 1,478             | 9.51%                   |
| <b>postnatal lethality</b>       | 1          | <b>0.0000</b>     | <b>0.0000</b>   | 2.1099                | 3,290                      | 13.26%                    | 47         | <b>1.5822e-48</b> | 1.3906                | 946                      | 1,375             | 8.94%                   |

The test set of 24,805 genomic regions picked 10,585 (49%) of all 21,395 genes.

*Mouse Phenotype* has 9,575 terms covering 9,654 (45%) of all 21,395 genes, and 705,265 term - gene associations. 9,575 ontology terms (100%) were tested using an annotation count range of [1, Inf].
