# Supplementary material for: AP-2α and AP-2β cooperatively function in the craniofacial surface ectoderm to regulate chromatin and gene expression dynamics during facial development
Source: eLife journal article supplement (doi:10.7554/elife.70511), 2022-03-25
Supplement: supp [file elife-70511-supp-v1.zip]

### Job Description

Job ID: 20201106-public-4.0.4-pOIBTG  
 Display name:   
 Test set: cluster\_1\_galaxy.bed (10,363 genomic regions)  
[Show in UCSC genome browser.](#) [How do I look at my regions in the genome?](#)  
 Background: Whole genome background  
 Assembly: Mouse: NCBI build 38 (UCSC mm10, Dec. 2011) [What gene set does GREAT use?](#)  
 Associated genomic regions: Basal+extension (constitutive 5.0 kb upstream and 1.0 kb downstream, up to 100.0 kb max extension). Curated regulatory domains are included.  
 137 of all 10,363 genomic regions (1.3%) are not associated with any genes.  
[View all genomic region-gene associations.](#) [Which genes are my regions associated with?](#)  
[Revise the region-gene association rule.](#) [How are my regions associated with genes?](#)

### Region-Gene Association Graphs

[What do these graphs illustrate?](#)

Number of associated genes per region

[Download as PDF.](#)

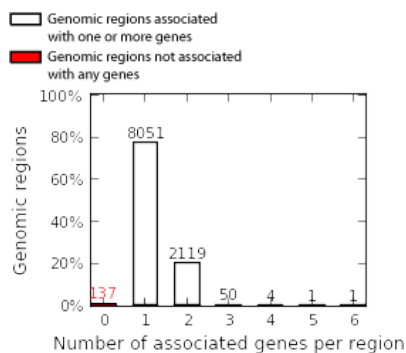

Binned by orientation and distance to TSS

[Download as PDF.](#)

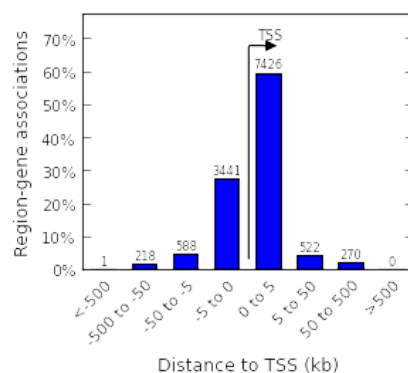

Binned by absolute distance to TSS

[Download as PDF.](#)

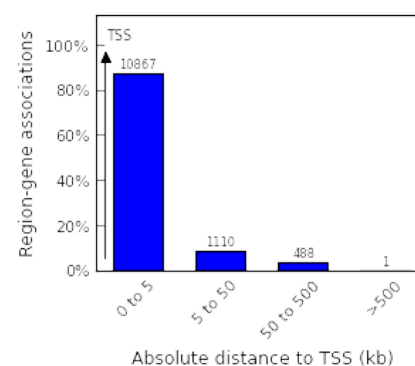

### Global Controls

[Which data is exported by each option?](#)

### Ensembl Genes (no terms)

Global controls

### GO Biological Process (20+ terms)

Global controls

Table controls:

Shown top rows in this table:

Term annotation count: Min:  Max:

Visualize this table:

| Term Name                                                | Binom Rank | Binom Raw P-Value | Binom FDR Q-Val | Binom Fold Enrichment | Binom Observed Region Hits | Binom Region Set Coverage | Hyper Rank | Hyper FDR Q-Val | Hyper Fold Enrichment | Hyper Observed Gene Hits | Hyper Total Genes | Hyper Gene Set Coverage |
|----------------------------------------------------------|------------|-------------------|-----------------|-----------------------|----------------------------|---------------------------|------------|-----------------|-----------------------|--------------------------|-------------------|-------------------------|
| <a href="#">cellular metabolic process</a>               | 1          | 0.0000            | 0.0000          | 2.1754                | 5,642                      | 54.44%                    | 1          | 0.0000          | 1.3744                | 5,299                    | 7,645             | 49.11%                  |
| <a href="#">cellular macromolecule metabolic process</a> | 1          | 0.0000            | 0.0000          | 2.2797                | 4,758                      | 45.91%                    | 1          | 0.0000          | 1.4471                | 4,341                    | 5,948             | 40.23%                  |
| <a href="#">primary metabolic process</a>                | 1          | 0.0000            | 0.0000          | 2.1537                | 5,656                      | 54.58%                    | 3          | 4.1172e-315     | 1.3374                | 5,288                    | 7,840             | 49.01%                  |
| <a href="#">organic substance metabolic process</a>      | 1          | 0.0000            | 0.0000          | 2.1356                | 5,863                      | 56.58%                    | 4          | 7.1684e-314     | 1.3241                | 5,495                    | 8,229             | 50.93%                  |

| Term Name                                        | Binom Rank | Binom Raw P-Value | Binom FDR Q-Val | Binom Fold Enrichment | Binom Observed Region Hits | Binom Region Set Coverage | Hyper Rank | Hyper FDR Q-Val | Hyper Fold Enrichment | Hyper Observed Gene Hits | Hyper Total Genes | Hyper Gene Set Coverage |
|--------------------------------------------------|------------|-------------------|-----------------|-----------------------|----------------------------|---------------------------|------------|-----------------|-----------------------|--------------------------|-------------------|-------------------------|
| metabolic process                                | 1          | 0.0000            | 0.0000          | 2.1144                | 6,062                      | 58.50%                    | 5          | 2.9869e-311     | 1.3088                | 5,732                    | 8,684             | 53.12%                  |
| macromolecule metabolic process                  | 1          | 0.0000            | 0.0000          | 2.2024                | 5,026                      | 48.50%                    | 6          | 5.5768e-311     | 1.3802                | 4,601                    | 6,610             | 42.64%                  |
| cellular nitrogen compound metabolic process     | 1          | 0.0000            | 0.0000          | 2.3494                | 3,605                      | 34.79%                    | 7          | 1.2216e-260     | 1.4552                | 3,224                    | 4,393             | 29.88%                  |
| nitrogen compound metabolic process              | 1          | 0.0000            | 0.0000          | 2.2888                | 3,792                      | 36.59%                    | 8          | 1.6901e-252     | 1.4286                | 3,405                    | 4,726             | 31.56%                  |
| nucleobase-containing compound metabolic process | 1          | 0.0000            | 0.0000          | 2.3600                | 3,203                      | 30.91%                    | 9          | 5.2295e-240     | 1.4771                | 2,827                    | 3,795             | 26.20%                  |
| heterocycle metabolic process                    | 1          | 0.0000            | 0.0000          | 2.3443                | 3,277                      | 31.62%                    | 10         | 1.5912e-235     | 1.4635                | 2,897                    | 3,925             | 26.85%                  |
| nucleic acid metabolic process                   | 1          | 0.0000            | 0.0000          | 2.4180                | 2,898                      | 27.96%                    | 11         | 6.6600e-231     | 1.5060                | 2,517                    | 3,314             | 23.33%                  |
| cellular aromatic compound metabolic process     | 1          | 0.0000            | 0.0000          | 2.3173                | 3,293                      | 31.78%                    | 12         | 1.2004e-228     | 1.4537                | 2,912                    | 3,972             | 26.99%                  |
| organic cyclic compound metabolic process        | 1          | 0.0000            | 0.0000          | 2.2870                | 3,389                      | 32.70%                    | 13         | 2.9937e-220     | 1.4337                | 3,005                    | 4,156             | 27.85%                  |
| cellular component organization or biogenesis    | 1          | 0.0000            | 0.0000          | 2.0322                | 3,781                      | 36.49%                    | 14         | 2.9067e-195     | 1.3650                | 3,440                    | 4,997             | 31.88%                  |
| gene expression                                  | 1          | 0.0000            | 0.0000          | 2.3642                | 2,742                      | 26.46%                    | 15         | 2.5992e-192     | 1.4760                | 2,353                    | 3,161             | 21.81%                  |
| cellular protein metabolic process               | 1          | 0.0000            | 0.0000          | 2.2199                | 2,577                      | 24.87%                    | 16         | 3.7990e-183     | 1.4649                | 2,336                    | 3,162             | 21.65%                  |
| cellular biosynthetic process                    | 1          | 0.0000            | 0.0000          | 2.1863                | 2,993                      | 28.88%                    | 17         | 1.9868e-173     | 1.4149                | 2,628                    | 3,683             | 24.36%                  |
| RNA metabolic process                            | 1          | 0.0000            | 0.0000          | 2.3580                | 2,498                      | 24.10%                    | 18         | 1.2928e-171     | 1.4766                | 2,129                    | 2,859             | 19.73%                  |
| organic substance biosynthetic process           | 1          | 0.0000            | 0.0000          | 2.1791                | 3,035                      | 29.29%                    | 19         | 1.8193e-170     | 1.4070                | 2,661                    | 3,750             | 24.66%                  |
| biosynthetic process                             | 1          | 0.0000            | 0.0000          | 2.1688                | 3,078                      | 29.70%                    | 20         | 3.1964e-169     | 1.4004                | 2,707                    | 3,833             | 25.09%                  |

The test set of 10,363 genomic regions picked 10,790 (50%) of all 21,395 genes.  
 GO Biological Process has 13,090 terms covering 17,925 (84%) of all 21,395 genes, and 1,163,819 term - gene associations.  
 13,090 ontology terms (100%) were tested using an annotation count range of [1, Inf].

GO Cellular Component (20+ terms)

Global controls

Table controls:  Shown top rows in this table:   Term annotation count: Min:  Max:   Visualize this table:

| Term Name                                | Binom Rank | Binom Raw P-Value | Binom FDR Q-Val | Binom Fold Enrichment | Binom Observed Region Hits | Binom Region Set Coverage | Hyper Rank | Hyper FDR Q-Val | Hyper Fold Enrichment | Hyper Observed Gene Hits | Hyper Total Genes | Hyper Gene Set Coverage |
|------------------------------------------|------------|-------------------|-----------------|-----------------------|----------------------------|---------------------------|------------|-----------------|-----------------------|--------------------------|-------------------|-------------------------|
| intracellular                            | 1          | 0.0000            | 0.0000          | 2.1073                | 8,920                      | 86.08%                    | 1          | 0.0000          | 1.2738                | 8,917                    | 13,881            | 82.64%                  |
| nucleus                                  | 1          | 0.0000            | 0.0000          | 2.2418                | 5,293                      | 51.08%                    | 1          | 0.0000          | 1.4167                | 4,857                    | 6,798             | 45.01%                  |
| cytoplasm                                | 1          | 0.0000            | 0.0000          | 2.0990                | 7,091                      | 68.43%                    | 1          | 0.0000          | 1.3167                | 6,928                    | 10,433            | 64.21%                  |
| organelle                                | 1          | 0.0000            | 0.0000          | 2.1049                | 8,418                      | 81.23%                    | 1          | 0.0000          | 1.2831                | 8,323                    | 12,862            | 77.14%                  |
| membrane-bounded organelle               | 1          | 0.0000            | 0.0000          | 2.1348                | 7,982                      | 77.02%                    | 1          | 0.0000          | 1.3091                | 7,793                    | 11,804            | 72.22%                  |
| intracellular organelle                  | 1          | 0.0000            | 0.0000          | 2.1677                | 8,052                      | 77.70%                    | 1          | 0.0000          | 1.3272                | 7,899                    | 11,801            | 73.21%                  |
| intracellular membrane-bounded organelle | 1          | 0.0000            | 0.0000          | 2.2281                | 7,308                      | 70.52%                    | 1          | 0.0000          | 1.3825                | 7,069                    | 10,139            | 65.51%                  |

| Term Name                                                    | Binom Rank | Binom Raw P-Value | Binom FDR Q-Val | Binom Fold Enrichment | Binom Observed Region Hits | Binom Region Set Coverage | Hyper Rank | Hyper FDR Q-Val | Hyper Fold Enrichment | Hyper Observed Gene Hits | Hyper Total Genes | Hyper Gene Set Coverage |
|--------------------------------------------------------------|------------|-------------------|-----------------|-----------------------|----------------------------|---------------------------|------------|-----------------|-----------------------|--------------------------|-------------------|-------------------------|
| <a href="#">organelle lumen</a>                              | 1          | 0.0000            | 0.0000          | 2.4688                | 3,544                      | 34.20%                    | 1          | 0.0000          | 1.5641                | 3,205                    | 4,063             | 29.70%                  |
| <a href="#">organelle part</a>                               | 1          | 0.0000            | 0.0000          | 2.2681                | 6,055                      | 58.43%                    | 1          | 0.0000          | 1.4123                | 5,790                    | 8,129             | 53.66%                  |
| <a href="#">intracellular part</a>                           | 1          | 0.0000            | 0.0000          | 2.1227                | 8,758                      | 84.51%                    | 1          | 0.0000          | 1.2885                | 8,738                    | 13,447            | 80.98%                  |
| <a href="#">nuclear part</a>                                 | 1          | 0.0000            | 0.0000          | 2.4301                | 3,502                      | 33.79%                    | 1          | 0.0000          | 1.5512                | 3,141                    | 4,015             | 29.11%                  |
| <a href="#">cytoplasmic part</a>                             | 1          | 0.0000            | 0.0000          | 2.1439                | 5,750                      | 55.49%                    | 1          | 0.0000          | 1.3627                | 5,511                    | 8,019             | 51.08%                  |
| <a href="#">intracellular organelle part</a>                 | 1          | 0.0000            | 0.0000          | 2.3042                | 5,979                      | 57.70%                    | 1          | 0.0000          | 1.4314                | 5,703                    | 7,900             | 52.85%                  |
| <a href="#">intracellular organelle lumen</a>                | 1          | 0.0000            | 0.0000          | 2.4720                | 3,543                      | 34.19%                    | 1          | 0.0000          | 1.5648                | 3,204                    | 4,060             | 29.69%                  |
| <a href="#">nuclear lumen</a>                                | 1          | 0.0000            | 0.0000          | 2.4464                | 3,166                      | 30.55%                    | 15         | 5.6226e-318     | 1.5634                | 2,818                    | 3,574             | 26.12%                  |
| <a href="#">nucleoplasm</a>                                  | 1          | 0.0000            | 0.0000          | 2.5392                | 2,492                      | 24.05%                    | 16         | 5.3197e-280     | 1.6201                | 2,193                    | 2,684             | 20.32%                  |
| <a href="#">macromolecular complex</a>                       | 1          | 0.0000            | 0.0000          | 2.2565                | 3,964                      | 38.25%                    | 17         | 4.8913e-276     | 1.4257                | 3,667                    | 5,100             | 33.99%                  |
| <a href="#">cytosol</a>                                      | 1          | 0.0000            | 0.0000          | 2.2801                | 2,807                      | 27.09%                    | 18         | 1.6815e-214     | 1.4842                | 2,509                    | 3,352             | 23.25%                  |
| <a href="#">protein complex</a>                              | 1          | 0.0000            | 0.0000          | 2.3392                | 2,665                      | 25.72%                    | 19         | 1.7751e-193     | 1.4738                | 2,371                    | 3,190             | 21.97%                  |
| <a href="#">intracellular non-membrane-bounded organelle</a> | 1          | 0.0000            | 0.0000          | 2.2206                | 3,222                      | 31.09%                    | 20         | 1.0608e-179     | 1.3930                | 2,905                    | 4,135             | 26.92%                  |

The test set of 10,363 genomic regions picked 10,790 (50%) of all 21,395 genes.  
 GO Cellular Component has 1,694 terms covering 19,074 (89%) of all 21,395 genes, and 371,380 term - gene associations.  
 1,694 ontology terms (100%) were tested using an annotation count range of [1, Inf].

GO Molecular Function (20+ terms)

Global controls

Table controls:  Shown top rows in this table:   Term annotation count: Min:  Max:   Visualize this table:

| Term Name                                                                                          | Binom Rank | Binom Raw P-Value | Binom FDR Q-Val | Binom Fold Enrichment | Binom Observed Region Hits | Binom Region Set Coverage | Hyper Rank | Hyper FDR Q-Val | Hyper Fold Enrichment | Hyper Observed Gene Hits | Hyper Total Genes | Hyper Gene Set Coverage |
|----------------------------------------------------------------------------------------------------|------------|-------------------|-----------------|-----------------------|----------------------------|---------------------------|------------|-----------------|-----------------------|--------------------------|-------------------|-------------------------|
| <a href="#">heterocyclic compound binding</a>                                                      | 1          | 0.0000            | 0.0000          | 2.1803                | 4,445                      | 42.89%                    | 1          | 1.1660e-203     | 1.3331                | 3,993                    | 5,939             | 37.01%                  |
| <a href="#">organic cyclic compound binding</a>                                                    | 1          | 0.0000            | 0.0000          | 2.1609                | 4,474                      | 43.17%                    | 2          | 1.4474e-192     | 1.3205                | 4,017                    | 6,032             | 37.23%                  |
| <a href="#">nucleic acid binding</a>                                                               | 1          | 0.0000            | 0.0000          | 2.3833                | 3,267                      | 31.53%                    | 3          | 1.1318e-187     | 1.4118                | 2,836                    | 3,983             | 26.28%                  |
| <a href="#">RNA binding</a>                                                                        | 8          | 2.8284e-298       | 1.4605e-295     | 2.8352                | 1,584                      | 15.29%                    | 4          | 9.8560e-177     | 1.6399                | 1,382                    | 1,671             | 12.81%                  |
| <a href="#">transferase activity</a>                                                               | 11         | 4.2811e-186       | 1.6078e-183     | 2.0565                | 1,812                      | 17.49%                    | 8          | 2.3413e-94      | 1.3992                | 1,647                    | 2,334             | 15.26%                  |
| <a href="#">DNA binding</a>                                                                        | 12         | 3.8927e-177       | 1.3401e-174     | 2.0867                | 1,680                      | 16.21%                    | 25         | 6.8530e-44      | 1.2896                | 1,371                    | 2,108             | 12.71%                  |
| <a href="#">enzyme binding</a>                                                                     | 13         | 7.0419e-166       | 2.2377e-163     | 2.1008                | 1,560                      | 15.05%                    | 9          | 2.7784e-84      | 1.4196                | 1,376                    | 1,922             | 12.75%                  |
| <a href="#">hydrolase activity, acting on acid anhydrides</a>                                      | 33         | 1.4043e-63        | 1.7579e-61      | 2.0538                | 656                        | 6.33%                     | 41         | 1.9260e-26      | 1.3631                | 585                      | 851               | 5.42%                   |
| <a href="#">hydrolase activity, acting on acid anhydrides, in phosphorus-containing anhydrides</a> | 34         | 1.6013e-63        | 1.9456e-61      | 2.0543                | 655                        | 6.32%                     | 40         | 1.6960e-26      | 1.3639                | 584                      | 849               | 5.41%                   |
| <a href="#">pyrophosphatase activity</a>                                                           | 35         | 2.9674e-63        | 3.5024e-61      | 2.0534                | 653                        | 6.30%                     | 42         | 3.1041e-26      | 1.3625                | 582                      | 847               | 5.39%                   |

| Term Name                                                   | Binom Rank | Binom Raw P-Value | Binom FDR Q-Val | Binom Fold Enrichment | Binom Observed Region Hits | Binom Region Set Coverage | Hyper Rank | Hyper FDR Q-Val | Hyper Fold Enrichment | Hyper Observed Gene Hits | Hyper Total Genes | Hyper Gene Set Coverage |
|-------------------------------------------------------------|------------|-------------------|-----------------|-----------------------|----------------------------|---------------------------|------------|-----------------|-----------------------|--------------------------|-------------------|-------------------------|
| transcription factor binding                                | 36         | 5.7220e-63        | 6.5660e-61      | 2.2333                | 539                        | 5.20%                     | 30         | 5.0014e-34      | 1.5057                | 426                      | 561               | 3.95%                   |
| kinase binding                                              | 37         | 1.8289e-60        | 2.0419e-58      | 2.1551                | 559                        | 5.39%                     | 35         | 8.3316e-31      | 1.4502                | 471                      | 644               | 4.37%                   |
| chromatin binding                                           | 38         | 2.7096e-59        | 2.9456e-57      | 2.2020                | 523                        | 5.05%                     | 36         | 1.6717e-30      | 1.4801                | 418                      | 560               | 3.87%                   |
| nucleoside-triphosphatase activity                          | 39         | 8.5414e-59        | 9.0473e-57      | 2.0438                | 614                        | 5.92%                     | 49         | 2.2088e-23      | 1.3515                | 548                      | 804               | 5.08%                   |
| protein kinase binding                                      | 43         | 6.5958e-52        | 6.3365e-50      | 2.1325                | 491                        | 4.74%                     | 39         | 5.7872e-27      | 1.4481                | 417                      | 571               | 3.86%                   |
| ubiquitin-like protein transferase activity                 | 44         | 5.3931e-51        | 5.0634e-49      | 2.2971                | 411                        | 3.97%                     | 31         | 2.1725e-33      | 1.5518                | 360                      | 460               | 3.34%                   |
| ubiquitin-protein transferase activity                      | 46         | 1.1365e-49        | 1.0206e-47      | 2.3060                | 397                        | 3.83%                     | 32         | 4.9046e-33      | 1.5602                | 347                      | 441               | 3.22%                   |
| transcription factor activity, protein binding              | 47         | 4.7643e-49        | 4.1875e-47      | 2.1159                | 472                        | 4.55%                     | 48         | 1.0574e-23      | 1.4397                | 379                      | 522               | 3.51%                   |
| transcription factor activity, transcription factor binding | 48         | 3.1485e-47        | 2.7097e-45      | 2.1024                | 461                        | 4.45%                     | 53         | 1.9132e-22      | 1.4312                | 371                      | 514               | 3.44%                   |
| transcription cofactor activity                             | 52         | 3.8286e-43        | 3.0415e-41      | 2.1441                | 402                        | 3.88%                     | 56         | 5.8032e-20      | 1.4380                | 322                      | 444               | 2.98%                   |

The test set of 10,363 genomic regions picked 10,790 (50%) of all 21,395 genes.  
 GO Molecular Function has 4,131 terms covering 17,189 (80%) of all 21,395 genes, and 227,341 term - gene associations.  
 4,131 ontology terms (100%) were tested using an annotation count range of [1, Inf].

Human Phenotype (20+ terms)

Global controls

Table controls:  Shown top rows in this table:   Term annotation count: Min:  Max:   Visualize this table:

| Term Name                                               | Binom Rank | Binom Raw P-Value | Binom FDR Q-Val | Binom Fold Enrichment | Binom Observed Region Hits | Binom Region Set Coverage | Hyper Rank | Hyper FDR Q-Val | Hyper Fold Enrichment | Hyper Observed Gene Hits | Hyper Total Genes | Hyper Gene Set Coverage |
|---------------------------------------------------------|------------|-------------------|-----------------|-----------------------|----------------------------|---------------------------|------------|-----------------|-----------------------|--------------------------|-------------------|-------------------------|
| Abnormality of the nervous system                       | 1          | 7.7393e-171       | 5.1072e-167     | 2.0426                | 1,702                      | 16.42%                    | 14         | 2.1253e-90      | 1.4187                | 1,471                    | 2,056             | 13.63%                  |
| Abnormality of nervous system physiology                | 2          | 1.7719e-163       | 5.8465e-160     | 2.0832                | 1,567                      | 15.12%                    | 10         | 2.9540e-93      | 1.4483                | 1,360                    | 1,862             | 12.60%                  |
| Abnormality of nervous system morphology                | 3          | 2.3863e-151       | 5.2491e-148     | 2.1703                | 1,339                      | 12.92%                    | 6          | 1.4349e-98      | 1.5105                | 1,164                    | 1,528             | 10.79%                  |
| Morphological abnormality of the central nervous system | 4          | 5.4701e-149       | 9.0242e-146     | 2.2360                | 1,242                      | 11.98%                    | 2          | 5.0716e-105     | 1.5565                | 1,077                    | 1,372             | 9.98%                   |
| Abnormality of the musculature                          | 5          | 1.0415e-147       | 1.3746e-144     | 2.2306                | 1,238                      | 11.95%                    | 16         | 2.2242e-89      | 1.5046                | 1,079                    | 1,422             | 10.00%                  |
| Abnormality of skeletal morphology                      | 6          | 1.2557e-146       | 1.3810e-143     | 2.1283                | 1,354                      | 13.07%                    | 17         | 9.1054e-86      | 1.4710                | 1,161                    | 1,565             | 10.76%                  |
| Neurodevelopmental abnormality                          | 7          | 2.4964e-146       | 2.3534e-143     | 2.2280                | 1,230                      | 11.87%                    | 3          | 6.5618e-102     | 1.5538                | 1,054                    | 1,345             | 9.77%                   |
| Abnormality of brain morphology                         | 8          | 4.0281e-143       | 3.3226e-140     | 2.2747                | 1,156                      | 11.16%                    | 1          | 3.4825e-108     | 1.5907                | 1,006                    | 1,254             | 9.32%                   |
| Abnormality of the skeletal system                      | 9          | 5.6923e-142       | 4.1738e-139     | 2.0823                | 1,377                      | 13.29%                    | 20         | 9.3095e-79      | 1.4430                | 1,184                    | 1,627             | 10.97%                  |
| Abnormality of head or neck                             | 10         | 1.0100e-140       | 6.6649e-138     | 2.0752                | 1,376                      | 13.28%                    | 23         | 1.0168e-77      | 1.4394                | 1,184                    | 1,631             | 10.97%                  |
| Abnormality of the head                                 | 11         | 3.4607e-140       | 2.0761e-137     | 2.0801                | 1,364                      | 13.16%                    | 21         | 1.9749e-78      | 1.4449                | 1,171                    | 1,607             | 10.85%                  |
| Abnormality of the eye                                  | 12         | 1.2155e-134       | 6.6843e-132     | 2.0871                | 1,304                      | 12.58%                    | 24         | 2.1388e-75      | 1.4457                | 1,125                    | 1,543             | 10.43%                  |

| Term Name                                           | Binom Rank | Binom Raw P-Value | Binom FDR Q-Val | Binom Fold Enrichment | Binom Observed Region Hits | Binom Region Set Coverage | Hyper Rank | Hyper FDR Q-Val | Hyper Fold Enrichment | Hyper Observed Gene Hits | Hyper Total Genes | Hyper Gene Set Coverage |
|-----------------------------------------------------|------------|-------------------|-----------------|-----------------------|----------------------------|---------------------------|------------|-----------------|-----------------------|--------------------------|-------------------|-------------------------|
| <a href="#">Abnormal axial skeleton morphology</a>  | 13         | 1.5110e-133       | 7.6701e-131     | 2.2080                | 1,149                      | 11.09%                    | 15         | 6.9730e-90      | 1.5336                | 990                      | 1,280             | 9.18%                   |
| <a href="#">Abnormality of muscle physiology</a>    | 14         | 4.8357e-131       | 2.2793e-128     | 2.2747                | 1,063                      | 10.26%                    | 19         | 4.0202e-84      | 1.5313                | 936                      | 1,212             | 8.67%                   |
| <a href="#">Neurodevelopmental delay</a>            | 15         | 2.3076e-126       | 1.0152e-123     | 2.3535                | 961                        | 9.27%                     | 13         | 9.9819e-91      | 1.6040                | 813                      | 1,005             | 7.53%                   |
| <a href="#">Abnormal muscle tone</a>                | 16         | 4.9795e-125       | 2.0537e-122     | 2.3818                | 930                        | 8.97%                     | 12         | 1.4414e-91      | 1.6055                | 817                      | 1,009             | 7.57%                   |
| <a href="#">Abnormality of the skull</a>            | 17         | 4.7307e-124       | 1.8364e-121     | 2.2871                | 998                        | 9.63%                     | 11         | 7.0335e-93      | 1.5922                | 860                      | 1,071             | 7.97%                   |
| <a href="#">Global developmental delay</a>          | 18         | 1.5712e-123       | 5.7603e-121     | 2.5634                | 805                        | 7.77%                     | 8          | 9.1349e-96      | 1.6904                | 682                      | 800               | 6.32%                   |
| <a href="#">Abnormality of the cerebrum</a>         | 20         | 3.2719e-120       | 1.0796e-117     | 2.3923                | 888                        | 8.57%                     | 4          | 4.3467e-101     | 1.6658                | 767                      | 913               | 7.11%                   |
| <a href="#">Abnormality of forebrain morphology</a> | 21         | 6.8040e-120       | 2.1381e-117     | 2.3876                | 889                        | 8.58%                     | 5          | 6.4452e-101     | 1.6643                | 768                      | 915               | 7.12%                   |

The test set of 10,363 genomic regions picked 10,790 (50%) of all 21,395 genes. *Human Phenotype* has 6,599 terms covering 3,215 (15%) of all 21,395 genes, and 244,972 term - gene associations. 6,599 ontology terms (100%) were tested using an annotation count range of [1, Inf].

☐ Mouse Phenotype Single KO (20+ terms)

Global controls

Table controls:  Shown top rows in this table:   Term annotation count: Min:  Max:   Visualize this table:

| Term Name                                                    | Binom Rank | Binom Raw P-Value | Binom FDR Q-Val | Binom Fold Enrichment | Binom Observed Region Hits | Binom Region Set Coverage | Hyper Rank | Hyper FDR Q-Val | Hyper Fold Enrichment | Hyper Observed Gene Hits | Hyper Total Genes | Hyper Gene Set Coverage |
|--------------------------------------------------------------|------------|-------------------|-----------------|-----------------------|----------------------------|---------------------------|------------|-----------------|-----------------------|--------------------------|-------------------|-------------------------|
| <a href="#">preweaning lethality</a>                         | 1          | 0.0000            | 0.0000          | 2.0809                | 3,096                      | 29.88%                    | 1          | 1.1384e-241     | 1.4963                | 2,697                    | 3,574             | 25.00%                  |
| <a href="#">abnormal survival</a>                            | 1          | 0.0000            | 0.0000          | 2.0402                | 3,376                      | 32.58%                    | 2          | 7.5098e-241     | 1.4632                | 2,959                    | 4,010             | 27.42%                  |
| <a href="#">prenatal lethality</a>                           | 4          | 2.0302e-257       | 4.6542e-254     | 2.3251                | 1,908                      | 18.41%                    | 3          | 3.4866e-218     | 1.6448                | 1,659                    | 2,000             | 15.38%                  |
| <a href="#">embryonic lethality</a>                          | 5          | 8.7049e-219       | 1.5965e-215     | 2.4369                | 1,514                      | 14.61%                    | 5          | 2.2779e-200     | 1.7055                | 1,322                    | 1,537             | 12.25%                  |
| <a href="#">embryo phenotype</a>                             | 9          | 5.1922e-150       | 5.2903e-147     | 2.1021                | 1,420                      | 13.70%                    | 7          | 5.9988e-119     | 1.5549                | 1,210                    | 1,543             | 11.21%                  |
| <a href="#">embryonic lethality prior to tooth bud stage</a> | 11         | 6.1674e-128       | 5.1414e-125     | 2.6749                | 775                        | 7.48%                     | 6          | 1.2608e-126     | 1.8009                | 683                      | 752               | 6.33%                   |
| <a href="#">embryonic lethality prior to organogenesis</a>   | 13         | 6.8683e-121       | 4.8448e-118     | 2.7423                | 704                        | 6.79%                     | 8          | 1.3044e-117     | 1.8108                | 621                      | 680               | 5.76%                   |
| <a href="#">abnormal embryo morphology</a>                   | 14         | 9.9529e-117       | 6.5192e-114     | 2.1108                | 1,112                      | 10.73%                    | 10         | 5.5429e-98      | 1.5815                | 934                      | 1,171             | 8.66%                   |
| <a href="#">abnormal prenatal growth/weight/body size</a>    | 17         | 1.1297e-104       | 6.0938e-102     | 2.1446                | 968                        | 9.34%                     | 9          | 5.1160e-100     | 1.6367                | 818                      | 991               | 7.58%                   |
| <a href="#">preweaning lethality, complete penetrance</a>    | 18         | 1.7663e-103       | 8.9986e-101     | 2.4273                | 747                        | 7.21%                     | 11         | 5.1414e-94      | 1.6916                | 668                      | 783               | 6.19%                   |
| <a href="#">abnormal embryo development</a>                  | 19         | 5.4444e-103       | 2.6276e-100     | 2.2575                | 856                        | 8.26%                     | 13         | 4.9705e-90      | 1.6444                | 724                      | 873               | 6.71%                   |
| <a href="#">abnormal embryonic growth/weight/body size</a>   | 22         | 9.1130e-90        | 3.7985e-87      | 2.1755                | 809                        | 7.81%                     | 12         | 5.3138e-90      | 1.6649                | 686                      | 817               | 6.36%                   |
| <a href="#">abnormal prenatal body size</a>                  | 34         | 2.4610e-75        | 6.6375e-73      | 2.1097                | 729                        | 7.03%                     | 16         | 2.4187e-74      | 1.6356                | 617                      | 748               | 5.72%                   |
| <a href="#">abnormal cell morphology</a>                     | 35         | 3.2559e-75        | 8.5305e-73      | 2.0077                | 817                        | 7.88%                     | 31         | 1.1448e-37      | 1.3970                | 713                      | 1,012             | 6.61%                   |
| <a href="#">abnormal embryonic tissue morphology</a>         | 36         | 5.0065e-75        | 1.2753e-72      | 2.0308                | 793                        | 7.65%                     | 22         | 2.0910e-59      | 1.5407                | 655                      | 843               | 6.07%                   |
| <a href="#">embryonic lethality during organogenesis</a>     | 37         | 9.6278e-75        | 2.3861e-72      | 2.1234                | 713                        | 6.88%                     | 19         | 3.8086e-64      | 1.5959                | 598                      | 743               | 5.54%                   |

| Term Name                                                                     | Binom Rank | Binom Raw P-Value | Binom FDR Q-Val   | Binom Fold Enrichment | Binom Observed Region Hits | Binom Region Set Coverage | Hyper Rank | Hyper FDR Q-Val   | Hyper Fold Enrichment | Hyper Observed Gene Hits | Hyper Total Genes | Hyper Gene Set Coverage |
|-------------------------------------------------------------------------------|------------|-------------------|-------------------|-----------------------|----------------------------|---------------------------|------------|-------------------|-----------------------|--------------------------|-------------------|-------------------------|
| <a href="#">prenatal growth retardation</a>                                   | 46         | <b>1.1013e-64</b> | <b>2.1954e-62</b> | 2.2463                | 547                        | 5.28%                     | 20         | <b>9.2828e-64</b> | 1.6896                | 461                      | 541               | 4.27%                   |
| <a href="#">abnormal embryo size</a>                                          | 48         | <b>3.3977e-64</b> | <b>6.4910e-62</b> | 2.1333                | 607                        | 5.86%                     | 17         | <b>3.0571e-67</b> | 1.6664                | 516                      | 614               | 4.78%                   |
| <a href="#">embryonic lethality during organogenesis, complete penetrance</a> | 49         | <b>1.0243e-61</b> | <b>1.9169e-59</b> | 2.1493                | 574                        | 5.54%                     | 23         | <b>3.6147e-56</b> | 1.6276                | 481                      | 586               | 4.46%                   |
| <a href="#">embryonic lethality between implantation and placentation</a>     | 51         | <b>6.2623e-61</b> | <b>1.1260e-58</b> | 2.5153                | 413                        | 3.99%                     | 21         | <b>7.6007e-61</b> | 1.7741                | 357                      | 399               | 3.31%                   |

The test set of 10,363 genomic regions picked 10,790 (50%) of all 21,395 genes.  
 Mouse Phenotype Single KO has 9,170 terms covering 9,466 (44%) of all 21,395 genes, and 551,620 term - gene associations.  
 9,170 ontology terms (100%) were tested using an annotation count range of [1, Inf].

**Mouse Phenotype (20+ terms)**

Global controls

Table controls:  Shown top rows in this table:   Term annotation count: Min:  Max:   Visualize this table:

| Term Name                                                                     | Binom Rank | Binom Raw P-Value  | Binom FDR Q-Val    | Binom Fold Enrichment | Binom Observed Region Hits | Binom Region Set Coverage | Hyper Rank | Hyper FDR Q-Val    | Hyper Fold Enrichment | Hyper Observed Gene Hits | Hyper Total Genes | Hyper Gene Set Coverage |
|-------------------------------------------------------------------------------|------------|--------------------|--------------------|-----------------------|----------------------------|---------------------------|------------|--------------------|-----------------------|--------------------------|-------------------|-------------------------|
| <a href="#">preweaning lethality</a>                                          | 1          | <b>0.0000</b>      | <b>0.0000</b>      | 2.0374                | 3,410                      | 32.91%                    | 1          | <b>5.2831e-243</b> | 1.4628                | 2,987                    | 4,049             | 27.68%                  |
| <a href="#">prenatal lethality</a>                                            | 4          | <b>4.4271e-291</b> | <b>1.0597e-287</b> | 2.2713                | 2,219                      | 21.41%                    | 3          | <b>6.8570e-228</b> | 1.6039                | 1,913                    | 2,365             | 17.73%                  |
| <a href="#">embryonic lethality</a>                                           | 5          | <b>3.3330e-253</b> | <b>6.3827e-250</b> | 2.4105                | 1,764                      | 17.02%                    | 4          | <b>2.3486e-215</b> | 1.6759                | 1,518                    | 1,796             | 14.07%                  |
| <a href="#">embryo phenotype</a>                                              | 9          | <b>9.0263e-174</b> | <b>9.6030e-171</b> | 2.0945                | 1,638                      | 15.81%                    | 6          | <b>1.6400e-129</b> | 1.5346                | 1,390                    | 1,796             | 12.88%                  |
| <a href="#">abnormal embryo morphology</a>                                    | 13         | <b>7.8477e-143</b> | <b>5.7802e-140</b> | 2.1285                | 1,321                      | 12.75%                    | 10         | <b>1.4175e-110</b> | 1.5644                | 1,099                    | 1,393             | 10.19%                  |
| <a href="#">embryonic lethality prior to tooth bud stage</a>                  | 16         | <b>7.2705e-134</b> | <b>4.3510e-131</b> | 2.6359                | 830                        | 8.01%                     | 7          | <b>6.8197e-128</b> | 1.7777                | 728                      | 812               | 6.75%                   |
| <a href="#">abnormal prenatal growth/weight/body size</a>                     | 19         | <b>9.8239e-128</b> | <b>4.9507e-125</b> | 2.1546                | 1,159                      | 11.18%                    | 9          | <b>1.1021e-113</b> | 1.6187                | 969                      | 1,187             | 8.98%                   |
| <a href="#">embryonic lethality prior to organogenesis</a>                    | 20         | <b>1.3045e-125</b> | <b>6.2451e-123</b> | 2.6905                | 754                        | 7.28%                     | 8          | <b>6.0252e-119</b> | 1.7884                | 662                      | 734               | 6.14%                   |
| <a href="#">abnormal embryo development</a>                                   | 22         | <b>1.6141e-118</b> | <b>7.0250e-116</b> | 2.2310                | 1,004                      | 9.69%                     | 12         | <b>3.0130e-98</b>  | 1.6194                | 842                      | 1,031             | 7.80%                   |
| <a href="#">abnormal embryonic growth/weight/body size</a>                    | 25         | <b>2.8873e-114</b> | <b>1.1059e-111</b> | 2.2008                | 997                        | 9.62%                     | 11         | <b>3.6862e-107</b> | 1.6557                | 830                      | 994               | 7.69%                   |
| <a href="#">preweaning lethality, complete penetrance</a>                     | 31         | <b>6.6396e-105</b> | <b>2.0508e-102</b> | 2.3988                | 774                        | 7.47%                     | 14         | <b>2.6805e-93</b>  | 1.6763                | 689                      | 815               | 6.39%                   |
| <a href="#">embryonic lethality during organogenesis</a>                      | 33         | <b>2.1034e-103</b> | <b>6.1030e-101</b> | 2.1721                | 931                        | 8.98%                     | 17         | <b>5.6879e-82</b>  | 1.5917                | 765                      | 953               | 7.09%                   |
| <a href="#">abnormal prenatal body size</a>                                   | 40         | <b>1.0951e-94</b>  | <b>2.6214e-92</b>  | 2.1500                | 874                        | 8.43%                     | 16         | <b>2.8525e-87</b>  | 1.6300                | 730                      | 888               | 6.77%                   |
| <a href="#">abnormal embryonic tissue morphology</a>                          | 42         | <b>2.8190e-94</b>  | <b>6.4266e-92</b>  | 2.0501                | 968                        | 9.34%                     | 23         | <b>2.2771e-66</b>  | 1.5155                | 788                      | 1,031             | 7.30%                   |
| <a href="#">abnormal cell morphology</a>                                      | 44         | <b>2.0349e-92</b>  | <b>4.4283e-90</b>  | 2.0243                | 978                        | 9.44%                     | 31         | <b>2.9209e-48</b>  | 1.4102                | 852                      | 1,198             | 7.90%                   |
| <a href="#">embryonic lethality during organogenesis, complete penetrance</a> | 50         | <b>5.8681e-85</b>  | <b>1.1237e-82</b>  | 2.1898                | 756                        | 7.30%                     | 20         | <b>2.9784e-71</b>  | 1.6181                | 621                      | 761               | 5.76%                   |
| <a href="#">abnormal embryo size</a>                                          | 52         | <b>1.1754e-82</b>  | <b>2.1643e-80</b>  | 2.1869                | 738                        | 7.12%                     | 18         | <b>6.8221e-82</b>  | 1.6709                | 616                      | 731               | 5.71%                   |
| <a href="#">prenatal growth retardation</a>                                   | 60         | <b>1.3664e-75</b>  | <b>2.1805e-73</b>  | 2.2067                | 663                        | 6.40%                     | 21         | <b>2.2047e-70</b>  | 1.6564                | 553                      | 662               | 5.13%                   |

| Term Name                           | Binom Rank | Binom Raw P-Value | Binom FDR Q-Val   | Binom Fold Enrichment | Binom Observed Region Hits | Binom Region Set Coverage | Hyper Rank | Hyper FDR Q-Val   | Hyper Fold Enrichment | Hyper Observed Gene Hits | Hyper Total Genes | Hyper Gene Set Coverage |
|-------------------------------------|------------|-------------------|-------------------|-----------------------|----------------------------|---------------------------|------------|-------------------|-----------------------|--------------------------|-------------------|-------------------------|
| <b>decreased embryo size</b>        | 70         | <b>9.2257e-69</b> | <b>1.2619e-66</b> | 2.1557                | 635                        | 6.13%                     | 22         | <b>3.8289e-69</b> | 1.6688                | 526                      | 625               | 4.87%                   |
| <b>embryonic growth retardation</b> | 76         | <b>1.2484e-65</b> | <b>1.5729e-63</b> | 2.2125                | 573                        | 5.53%                     | 24         | <b>1.2880e-62</b> | 1.6687                | 478                      | 568               | 4.43%                   |

The test set of 10,363 genomic regions picked 10,790 (50%) of all 21,395 genes.

*Mouse Phenotype* has 9,575 terms covering 9,654 (45%) of all 21,395 genes, and 705,265 term - gene associations. 9,575 ontology terms (100%) were tested using an annotation count range of [1, Inf].
