# Supplementary material for: AP-2α and AP-2β cooperatively function in the craniofacial surface ectoderm to regulate chromatin and gene expression dynamics during facial development
Source: eLife journal article supplement (doi:10.7554/elife.70511), 2022-03-25
Supplement: supp [file elife-70511-supp-v1.zip]

# Homer Known Motif Enrichment Results (output/)

[Homer \*de novo\* Motif Results](#)

[Gene Ontology Enrichment Results](#)

[Known Motif Enrichment Results \(txt file\)](#)

Total Target Sequences = 10362, Total Background Sequences = 33662

| Rank | Motif                                                                               | Name                                             | P-value | log P-value | q-value (Benjamini) | # Target Sequences with Motif | % of Targets Sequences with Motif | # Background Sequences with Motif | % of Background Sequences with Motif | Motif File                          | SVG                 |
|------|-------------------------------------------------------------------------------------|--------------------------------------------------|---------|-------------|---------------------|-------------------------------|-----------------------------------|-----------------------------------|--------------------------------------|-------------------------------------|---------------------|
| 1    | 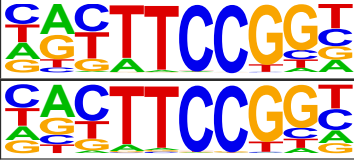   | Elk4(ETS)/Hela-Elk4-ChIP-Seq(GSE31477)/Homer     | 1e-214  | -4.950e+02  | 0.0000              | 6721.0                        | 64.86%                            | 16686.2                           | 49.57%                               | <a href="#">motif file (matrix)</a> | <a href="#">svg</a> |
| 2    |    | Elk1(ETS)/Hela-Elk1-ChIP-Seq(GSE31477)/Homer     | 1e-197  | -4.557e+02  | 0.0000              | 6543.0                        | 63.14%                            | 16306.3                           | 48.45%                               | <a href="#">motif file (matrix)</a> | <a href="#">svg</a> |
| 3    |    | ETS(ETS)/Promoter/Homer                          | 1e-171  | -3.953e+02  | 0.0000              | 4340.0                        | 41.88%                            | 9751.4                            | 28.97%                               | <a href="#">motif file (matrix)</a> | <a href="#">svg</a> |
| 4    |    | ELF1(ETS)/Jurkat-ELF1-ChIP-Seq(SRA014231)/Homer  | 1e-168  | -3.878e+02  | 0.0000              | 6020.0                        | 58.09%                            | 14982.9                           | 44.51%                               | <a href="#">motif file (matrix)</a> | <a href="#">svg</a> |
| 5    |    | Ronin(THAP)/ES-Thap11-ChIP-Seq(GSE51522)/Homer   | 1e-159  | -3.683e+02  | 0.0000              | 956.0                         | 9.23%                             | 1153.4                            | 3.43%                                | <a href="#">motif file (matrix)</a> | <a href="#">svg</a> |
| 6    |    | Sp1(Zf)/Promoter/Homer                           | 1e-147  | -3.387e+02  | 0.0000              | 6022.0                        | 58.11%                            | 15289.1                           | 45.42%                               | <a href="#">motif file (matrix)</a> | <a href="#">svg</a> |
| 7    |   | GFY-Staf(?,Zf)/Promoter/Homer                    | 1e-114  | -2.647e+02  | 0.0000              | 1097.0                        | 10.59%                            | 1684.8                            | 5.01%                                | <a href="#">motif file (matrix)</a> | <a href="#">svg</a> |
| 8    |   | GFY(?)/Promoter/Homer                            | 1e-101  | -2.327e+02  | 0.0000              | 1135.0                        | 10.95%                            | 1865.4                            | 5.54%                                | <a href="#">motif file (matrix)</a> | <a href="#">svg</a> |
| 9    |  | NRF1(NRF)/MCF7-NRF1-ChIP-Seq(Unpublished)/Homer  | 1e-86   | -2.000e+02  | 0.0000              | 3208.0                        | 30.96%                            | 7577.4                            | 22.51%                               | <a href="#">motif file (matrix)</a> | <a href="#">svg</a> |
| 10   |  | E2F4(E2F)/K562-E2F4-ChIP-Seq(GSE31477)/Homer     | 1e-77   | -1.781e+02  | 0.0000              | 6058.0                        | 58.46%                            | 16594.6                           | 49.30%                               | <a href="#">motif file (matrix)</a> | <a href="#">svg</a> |
| 11   |  | GABPA(ETS)/Jurkat-GABPa-ChIP-Seq(GSE17954)/Homer | 1e-67   | -1.565e+02  | 0.0000              | 6645.0                        | 64.12%                            | 18736.6                           | 55.67%                               | <a href="#">motif file (matrix)</a> | <a href="#">svg</a> |
| 12   |  | Fli1(ETS)/CD8-FLI-ChIP-Seq(GSE20898)/Homer       | 1e-65   | -1.519e+02  | 0.0000              | 7708.0                        | 74.38%                            | 22409.6                           | 66.58%                               | <a href="#">motif file (matrix)</a> | <a href="#">svg</a> |
| 13   |  | NRF(NRF)/Promoter/Homer                          | 1e-65   | -1.510e+02  | 0.0000              | 3187.0                        | 30.75%                            | 7870.5                            | 23.38%                               | <a href="#">motif file (matrix)</a> | <a href="#">svg</a> |
| 14   |  | ETV4(ETS)/HepG2-ETV4-ChIP-Seq(ENCODE)/Homer      | 1e-51   | -1.184e+02  | 0.0000              | 7885.0                        | 76.09%                            | 23352.5                           | 69.38%                               | <a href="#">motif file (matrix)</a> | <a href="#">svg</a> |

|    |                                                                                     |                                                                 |       |            |        |        |        |         |        |                                     |                     |
|----|-------------------------------------------------------------------------------------|-----------------------------------------------------------------|-------|------------|--------|--------|--------|---------|--------|-------------------------------------|---------------------|
| 15 |     | HINFP(Zf)/K562-HINFP.eGFP-ChIP-Seq(Encode)/Homer                | 1e-38 | -8.879e+01 | 0.0000 | 5102.0 | 49.23% | 14423.0 | 42.85% | <a href="#">motif file (matrix)</a> | <a href="#">svg</a> |
| 16 |    | KLF3(Zf)/MEF-Klf3-ChIP-Seq(GSE44748)/Homer                      | 1e-33 | -7.780e+01 | 0.0000 | 6428.0 | 62.03% | 18887.1 | 56.11% | <a href="#">motif file (matrix)</a> | <a href="#">svg</a> |
| 17 |    | YY1(Zf)/Promoter/Homer                                          | 1e-31 | -7.329e+01 | 0.0000 | 1301.0 | 12.55% | 3044.4  | 9.04%  | <a href="#">motif file (matrix)</a> | <a href="#">svg</a> |
| 18 |    | EWS:FLI1-fusion(ETS)/SK_N_MC-EWS:FLI1-ChIP-Seq(SRA014231)/Homer | 1e-31 | -7.144e+01 | 0.0000 | 4287.0 | 41.37% | 12054.1 | 35.81% | <a href="#">motif file (matrix)</a> | <a href="#">svg</a> |
| 19 |    | ETV1(ETS)/GIST48-ETV1-ChIP-Seq(GSE22441)/Homer                  | 1e-27 | -6.350e+01 | 0.0000 | 7812.0 | 75.38% | 23746.5 | 70.55% | <a href="#">motif file (matrix)</a> | <a href="#">svg</a> |
| 20 |    | Elf4(ETS)/BMDM-Elf4-ChIP-Seq(GSE88699)/Homer                    | 1e-24 | -5.725e+01 | 0.0000 | 6481.0 | 62.54% | 19360.2 | 57.52% | <a href="#">motif file (matrix)</a> | <a href="#">svg</a> |
| 21 |    | ETS1(ETS)/Jurkat-ETS1-ChIP-Seq(GSE17954)/Homer                  | 1e-24 | -5.632e+01 | 0.0000 | 6546.0 | 63.17% | 19590.5 | 58.20% | <a href="#">motif file (matrix)</a> | <a href="#">svg</a> |
| 22 |    | E2F1(E2F)/Hela-E2F1-ChIP-Seq(GSE22478)/Homer                    | 1e-23 | -5.443e+01 | 0.0000 | 3873.0 | 37.37% | 10991.9 | 32.66% | <a href="#">motif file (matrix)</a> | <a href="#">svg</a> |
| 23 |    | KLF1(Zf)/HUDEP2-KLF1-CutnRun(GSE136251)/Homer                   | 1e-23 | -5.443e+01 | 0.0000 | 8262.0 | 79.73% | 25424.4 | 75.54% | <a href="#">motif file (matrix)</a> | <a href="#">svg</a> |
| 24 |    | E2F7(E2F)/Hela-E2F7-ChIP-Seq(GSE32673)/Homer                    | 1e-23 | -5.388e+01 | 0.0000 | 2203.0 | 21.26% | 5858.1  | 17.40% | <a href="#">motif file (matrix)</a> | <a href="#">svg</a> |
| 25 |    | CRE(bZIP)/Promoter/Homer                                        | 1e-22 | -5.223e+01 | 0.0000 | 2203.0 | 21.26% | 5878.3  | 17.46% | <a href="#">motif file (matrix)</a> | <a href="#">svg</a> |
| 26 |   | Sp5(Zf)/mES-Sp5.Flag-ChIP-Seq(GSE72989)/Homer                   | 1e-20 | -4.727e+01 | 0.0000 | 8769.0 | 84.62% | 27294.7 | 81.09% | <a href="#">motif file (matrix)</a> | <a href="#">svg</a> |
| 27 |  | E2F(E2F)/Hela-CellCycle-Expression/Homer                        | 1e-20 | -4.643e+01 | 0.0000 | 1044.0 | 10.07% | 2539.8  | 7.55%  | <a href="#">motif file (matrix)</a> | <a href="#">svg</a> |
| 28 |  | Npas4(bHLH)/Neuron-Npas4-ChIP-Seq(GSE127793)/Homer              | 1e-18 | -4.341e+01 | 0.0000 | 5738.0 | 55.37% | 17153.7 | 50.96% | <a href="#">motif file (matrix)</a> | <a href="#">svg</a> |
| 29 |  | Zfp57(Zf)/H1-ZFP57.HA-ChIP-Seq(GSE115387)/Homer                 | 1e-18 | -4.338e+01 | 0.0000 | 4888.0 | 47.17% | 14401.1 | 42.79% | <a href="#">motif file (matrix)</a> | <a href="#">svg</a> |
| 30 |  | E2F3(E2F)/MEF-E2F3-ChIP-Seq(GSE71376)/Homer                     | 1e-17 | -4.030e+01 | 0.0000 | 6683.0 | 64.49% | 20318.3 | 60.37% | <a href="#">motif file (matrix)</a> | <a href="#">svg</a> |
| 31 |  | Klf9(Zf)/GBM-Klf9-ChIP-Seq(GSE62211)/Homer                      | 1e-17 | -3.976e+01 | 0.0000 | 5455.0 | 52.64% | 16301.0 | 48.43% | <a href="#">motif file (matrix)</a> | <a href="#">svg</a> |
| 32 |  | ELF5(ETS)/T47D-ELF5-ChIP-Seq(GSE30407)/Homer                    | 1e-16 | -3.783e+01 | 0.0000 | 4675.0 | 45.11% | 13820.0 | 41.06% | <a href="#">motif file (matrix)</a> | <a href="#">svg</a> |
| 33 |                                                                                     | Klf4(Zf)/mES-Klf4-ChIP-                                         | 1e-   | -3.627e+01 | 0.0000 | 4265.0 | 41.16% | 12539.0 | 37.25% | <a href="#">motif</a>               | <a href="#">svg</a> |

|    |                                                                                     |                                                    |       |            |        |        |        |         |        |                                     |                     |
|----|-------------------------------------------------------------------------------------|----------------------------------------------------|-------|------------|--------|--------|--------|---------|--------|-------------------------------------|---------------------|
|    |     | Seq(GSE11431)/Homer                                | 15    |            |        |        |        |         |        | <a href="#">file (matrix)</a>       |                     |
| 34 |    | Etv2(ETS)/ES-ER71-ChIP-Seq(GSE59402)/Homer         | 1e-15 | -3.597e+01 | 0.0000 | 5637.0 | 54.40% | 16966.4 | 50.41% | <a href="#">motif file (matrix)</a> | <a href="#">svg</a> |
| 35 |    | E2F6(E2F)/Hela-E2F6-ChIP-Seq(GSE31477)/Homer       | 1e-14 | -3.318e+01 | 0.0000 | 6077.0 | 58.64% | 18461.4 | 54.85% | <a href="#">motif file (matrix)</a> | <a href="#">svg</a> |
| 36 |    | HIF2a(bHLH)/785_O-HIF2a-ChIP-Seq(GSE34871)/Homer   | 1e-13 | -3.162e+01 | 0.0000 | 3158.0 | 30.47% | 9129.7  | 27.12% | <a href="#">motif file (matrix)</a> | <a href="#">svg</a> |
| 37 |    | GFX(?)/Promoter/Homer                              | 1e-13 | -3.116e+01 | 0.0000 | 355.0  | 3.43%  | 756.9   | 2.25%  | <a href="#">motif file (matrix)</a> | <a href="#">svg</a> |
| 38 |    | c-Myc(bHLH)/LNCAP-cMyc-ChIP-Seq(Unpublished)/Homer | 1e-12 | -2.967e+01 | 0.0000 | 4363.0 | 42.10% | 12986.4 | 38.58% | <a href="#">motif file (matrix)</a> | <a href="#">svg</a> |
| 39 |    | E-box(bHLH)/Promoter/Homer                         | 1e-12 | -2.905e+01 | 0.0000 | 984.0  | 9.50%  | 2540.8  | 7.55%  | <a href="#">motif file (matrix)</a> | <a href="#">svg</a> |
| 40 |    | ZBTB33(Zf)/GM12878-ZBTB33-ChIP-Seq(GSE32465)/Homer | 1e-12 | -2.883e+01 | 0.0000 | 954.0  | 9.21%  | 2455.6  | 7.30%  | <a href="#">motif file (matrix)</a> | <a href="#">svg</a> |
| 41 |    | RFX(HTH)/K562-RFX3-ChIP-Seq(SRA012198)/Homer       | 1e-12 | -2.850e+01 | 0.0000 | 951.0  | 9.18%  | 2451.0  | 7.28%  | <a href="#">motif file (matrix)</a> | <a href="#">svg</a> |
| 42 |    | NFIL3(bZIP)/HepG2-NFIL3-ChIP-Seq(Encode)/Homer     | 1e-11 | -2.563e+01 | 0.0000 | 2499.0 | 24.11% | 7187.7  | 21.35% | <a href="#">motif file (matrix)</a> | <a href="#">svg</a> |
| 43 |    | TFE3(bHLH)/MEF-TFE3-ChIP-Seq(GSE75757)/Homer       | 1e-11 | -2.562e+01 | 0.0000 | 765.0  | 7.38%  | 1942.9  | 5.77%  | <a href="#">motif file (matrix)</a> | <a href="#">svg</a> |
| 44 |   | Arnt:Ahr(bHLH)/MCF7-Arnt-ChIP-Seq(Lo_et_al.)/Homer | 1e-10 | -2.437e+01 | 0.0000 | 5257.0 | 50.73% | 15988.9 | 47.50% | <a href="#">motif file (matrix)</a> | <a href="#">svg</a> |
| 45 |  | Six4(Homeobox)/MCF7-SIX4-ChIP-Seq(Encode)/Homer    | 1e-9  | -2.298e+01 | 0.0000 | 373.0  | 3.60%  | 859.2   | 2.55%  | <a href="#">motif file (matrix)</a> | <a href="#">svg</a> |
| 46 |  | Stat3(Stat)/mES-Stat3-ChIP-Seq(GSE11431)/Homer     | 1e-9  | -2.215e+01 | 0.0000 | 3625.0 | 34.98% | 10804.4 | 32.10% | <a href="#">motif file (matrix)</a> | <a href="#">svg</a> |
| 47 |  | Rfx2(HTH)/LoVo-RFX2-ChIP-Seq(GSE49402)/Homer       | 1e-9  | -2.155e+01 | 0.0000 | 973.0  | 9.39%  | 2601.6  | 7.73%  | <a href="#">motif file (matrix)</a> | <a href="#">svg</a> |
| 48 |  | JunD(bZIP)/K562-JunD-ChIP-Seq/Homer                | 1e-9  | -2.132e+01 | 0.0000 | 739.0  | 7.13%  | 1915.2  | 5.69%  | <a href="#">motif file (matrix)</a> | <a href="#">svg</a> |
| 49 |  | IRF8(IRF)/BMDM-IRF8-ChIP-Seq(GSE77884)/Homer       | 1e-9  | -2.131e+01 | 0.0000 | 1991.0 | 19.21% | 5697.7  | 16.93% | <a href="#">motif file (matrix)</a> | <a href="#">svg</a> |
| 50 |  | NFY(CCAAT)/Promoter/Homer                          | 1e-8  | -2.065e+01 | 0.0000 | 4913.0 | 47.41% | 14970.7 | 44.48% | <a href="#">motif file (matrix)</a> | <a href="#">svg</a> |
| 51 |                                                                                     | CEBP(bZIP)/ThioMac-CEBPb-ChIP-                     | 1e-8  | -2.048e+01 | 0.0000 | 2577.0 | 24.87% | 7537.8  | 22.39% | <a href="#">motif file (matrix)</a> | <a href="#">svg</a> |

|    |                                                                                     |                                                            |      |            |        |        |        |         |        |                                     |                     |
|----|-------------------------------------------------------------------------------------|------------------------------------------------------------|------|------------|--------|--------|--------|---------|--------|-------------------------------------|---------------------|
|    |     | Seq(GSE21512)/Homer                                        |      |            |        |        |        |         |        | <a href="#">file (matrix)</a>       |                     |
| 52 |    | SPDEF(ETS)/VCaP-SPDEF-ChIP-Seq(SRA014231)/Homer            | 1e-8 | -1.987e+01 | 0.0000 | 6010.0 | 57.99% | 18557.8 | 55.13% | <a href="#">motif file (matrix)</a> | <a href="#">svg</a> |
| 53 |    | IRF2(IRF)/Erythroblas-IRF2-ChIP-Seq(GSE36985)/Homer        | 1e-8 | -1.978e+01 | 0.0000 | 707.0  | 6.82%  | 1840.2  | 5.47%  | <a href="#">motif file (matrix)</a> | <a href="#">svg</a> |
| 54 |    | CHR(?)/Hela-CellCycle-Expression/Homer                     | 1e-7 | -1.725e+01 | 0.0000 | 2624.0 | 25.32% | 7760.6  | 23.06% | <a href="#">motif file (matrix)</a> | <a href="#">svg</a> |
| 55 |    | HIF-1a(bHLH)/MCF7-HIF1a-ChIP-Seq(GSE28352)/Homer           | 1e-7 | -1.698e+01 | 0.0000 | 2296.0 | 22.16% | 6738.3  | 20.02% | <a href="#">motif file (matrix)</a> | <a href="#">svg</a> |
| 56 |    | bHLHE40(bHLH)/HepG2-bHLHE40-ChIP-Seq(GSE31477)/Homer       | 1e-6 | -1.497e+01 | 0.0000 | 2514.0 | 24.26% | 7472.8  | 22.20% | <a href="#">motif file (matrix)</a> | <a href="#">svg</a> |
| 57 |    | TEAD1(TEAD)/HepG2-TEAD1-ChIP-Seq(Encode)/Homer             | 1e-6 | -1.431e+01 | 0.0000 | 4466.0 | 43.10% | 13713.0 | 40.74% | <a href="#">motif file (matrix)</a> | <a href="#">svg</a> |
| 58 |    | Rfx5(HTH)/GM12878-Rfx5-ChIP-Seq(GSE31477)/Homer            | 1e-5 | -1.251e+01 | 0.0000 | 2242.0 | 21.63% | 6683.8  | 19.86% | <a href="#">motif file (matrix)</a> | <a href="#">svg</a> |
| 59 |    | HIF-1b(HLH)/T47D-HIF1b-ChIP-Seq(GSE59937)/Homer            | 1e-5 | -1.222e+01 | 0.0000 | 7030.0 | 67.84% | 22141.4 | 65.78% | <a href="#">motif file (matrix)</a> | <a href="#">svg</a> |
| 60 |    | ETS:RUNX(ETS,Runt)/Jurkat-RUNX1-ChIP-Seq(GSE17954)/Homer   | 1e-5 | -1.213e+01 | 0.0000 | 851.0  | 8.21%  | 2381.0  | 7.07%  | <a href="#">motif file (matrix)</a> | <a href="#">svg</a> |
| 61 |    | IRF4(IRF)/GM12878-IRF4-ChIP-Seq(GSE32465)/Homer            | 1e-5 | -1.158e+01 | 0.0001 | 2179.0 | 21.03% | 6511.6  | 19.35% | <a href="#">motif file (matrix)</a> | <a href="#">svg</a> |
| 62 |    | EHF(ETS)/LoVo-EHF-ChIP-Seq(GSE49402)/Homer                 | 1e-4 | -1.107e+01 | 0.0001 | 6613.0 | 63.81% | 20810.7 | 61.83% | <a href="#">motif file (matrix)</a> | <a href="#">svg</a> |
| 63 |   | STAT1(Stat)/HelaS3-STAT1-ChIP-Seq(GSE12782)/Homer          | 1e-4 | -1.050e+01 | 0.0002 | 1585.0 | 15.29% | 4679.7  | 13.90% | <a href="#">motif file (matrix)</a> | <a href="#">svg</a> |
| 64 |  | X-box(HTH)/NPC-H3K4me1-ChIP-Seq(GSE16256)/Homer            | 1e-4 | -9.323e+00 | 0.0006 | 793.0  | 7.65%  | 2258.6  | 6.71%  | <a href="#">motif file (matrix)</a> | <a href="#">svg</a> |
| 65 |  | TEAD(TEA)/Fibroblast-PU.1-ChIP-Seq(Unpublished)/Homer      | 1e-3 | -9.059e+00 | 0.0008 | 2874.0 | 27.73% | 8796.0  | 26.13% | <a href="#">motif file (matrix)</a> | <a href="#">svg</a> |
| 66 |  | DLX5(Homeobox)/BasalGanglia-Dlx5-ChIP-seq(GSE124936)/Homer | 1e-3 | -9.017e+00 | 0.0008 | 2708.0 | 26.13% | 8268.4  | 24.57% | <a href="#">motif file (matrix)</a> | <a href="#">svg</a> |
| 67 |  | ERG(ETS)/VCaP-ERG-ChIP-Seq(GSE14097)/Homer                 | 1e-3 | -8.260e+00 | 0.0017 | 7621.0 | 73.54% | 24238.9 | 72.01% | <a href="#">motif file (matrix)</a> | <a href="#">svg</a> |
| 68 |  | SpiB(ETS)/OCILY3-SPIB-ChIP-Seq(GSE56857)/Homer             | 1e-3 | -8.211e+00 | 0.0017 | 1540.0 | 14.86% | 4604.0  | 13.68% | <a href="#">motif file (matrix)</a> | <a href="#">svg</a> |
| 69 |                                                                                     | STAT6(Stat)/Macrophage-Stat6-                              | 1e-3 | -8.103e+00 | 0.0019 | 2522.0 | 24.34% | 7711.0  | 22.91% | <a href="#">motif</a>               | <a href="#">svg</a> |



|    |     | ChIP-Seq(GSE38377)/Homer                                       |      |            |        |        |        |         |        | <a href="#">file (matrix)</a>       |                     |
|----|-------------------------------------------------------------------------------------|----------------------------------------------------------------|------|------------|--------|--------|--------|---------|--------|-------------------------------------|---------------------|
| 70 |    | IRF1(IRF)/PBM-IRF1-ChIP-Seq(GSE43036)/Homer                    | 1e-3 | -7.168e+00 | 0.0048 | 777.0  | 7.50%  | 2256.1  | 6.70%  | <a href="#">motif file (matrix)</a> | <a href="#">svg</a> |
| 71 |    | HLF(bZIP)/HSC-HLF.Flag-ChIP-Seq(GSE69817)/Homer                | 1e-3 | -7.127e+00 | 0.0050 | 2807.0 | 27.09% | 8657.4  | 25.72% | <a href="#">motif file (matrix)</a> | <a href="#">svg</a> |
| 72 |    | STAT5(Stat)/mCD4+-Stat5-ChIP-Seq(GSE12346)/Homer               | 1e-3 | -6.923e+00 | 0.0060 | 1799.0 | 17.36% | 5461.7  | 16.23% | <a href="#">motif file (matrix)</a> | <a href="#">svg</a> |
| 73 |    | Six2(Homeobox)/NephronProgenitor-Six2-ChIP-Seq(GSE39837)/Homer | 1e-2 | -6.809e+00 | 0.0066 | 4492.0 | 43.35% | 14088.7 | 41.86% | <a href="#">motif file (matrix)</a> | <a href="#">svg</a> |
| 74 |    | Rfx1(HTH)/NPC-H3K4me1-ChIP-Seq(GSE16256)/Homer                 | 1e-2 | -6.597e+00 | 0.0081 | 1553.0 | 14.99% | 4696.1  | 13.95% | <a href="#">motif file (matrix)</a> | <a href="#">svg</a> |
| 75 |    | TEAD3(TEA)/HepG2-TEAD3-ChIP-Seq(Encode)/Homer                  | 1e-2 | -6.244e+00 | 0.0113 | 4912.0 | 47.40% | 15476.6 | 45.98% | <a href="#">motif file (matrix)</a> | <a href="#">svg</a> |
| 76 |    | Six1(Homeobox)/Myoblast-Six1-ChIP-Chip(GSE20150)/Homer         | 1e-2 | -5.768e+00 | 0.0180 | 1240.0 | 11.97% | 3739.1  | 11.11% | <a href="#">motif file (matrix)</a> | <a href="#">svg</a> |
| 77 |    | CEBP:CEBP(bZIP)/MEF-Chop-ChIP-Seq(GSE35681)/Homer              | 1e-2 | -5.665e+00 | 0.0197 | 505.0  | 4.87%  | 1454.3  | 4.32%  | <a href="#">motif file (matrix)</a> | <a href="#">svg</a> |
| 78 |    | Atf1(bZIP)/K562-ATF1-ChIP-Seq(GSE31477)/Homer                  | 1e-2 | -5.441e+00 | 0.0243 | 3290.0 | 31.75% | 10283.6 | 30.55% | <a href="#">motif file (matrix)</a> | <a href="#">svg</a> |
| 79 |    | Pknox1(Homeobox)/ES-Prep1-ChIP-Seq(GSE63282)/Homer             | 1e-2 | -5.406e+00 | 0.0249 | 1704.0 | 16.44% | 5218.2  | 15.50% | <a href="#">motif file (matrix)</a> | <a href="#">svg</a> |
| 80 |    | ZNF652/HepG2-ZNF652.Flag-ChIP-Seq(Encode)/Homer                | 1e-2 | -5.386e+00 | 0.0251 | 1305.0 | 12.59% | 3957.8  | 11.76% | <a href="#">motif file (matrix)</a> | <a href="#">svg</a> |
| 81 |   | Dlx3(Homeobox)/Keratinocytes-Dlx3-ChIP-Seq(GSE89884)/Homer     | 1e-2 | -5.210e+00 | 0.0295 | 2205.0 | 21.28% | 6820.3  | 20.26% | <a href="#">motif file (matrix)</a> | <a href="#">svg</a> |
| 82 |  | PBX1(Homeobox)/MCF7-PBX1-ChIP-Seq(GSE28007)/Homer              | 1e-2 | -5.158e+00 | 0.0307 | 655.0  | 6.32%  | 1929.7  | 5.73%  | <a href="#">motif file (matrix)</a> | <a href="#">svg</a> |
| 83 |  | ELF3(ETS)/PDAC-ELF3-ChIP-Seq(GSE64557)/Homer                   | 1e-2 | -5.116e+00 | 0.0317 | 4029.0 | 38.88% | 12681.8 | 37.68% | <a href="#">motif file (matrix)</a> | <a href="#">svg</a> |
| 84 |  | STAT6(Stat)/CD4-Stat6-ChIP-Seq(GSE22104)/Homer                 | 1e-2 | -5.049e+00 | 0.0335 | 2363.0 | 22.80% | 7332.7  | 21.79% | <a href="#">motif file (matrix)</a> | <a href="#">svg</a> |
| 85 |  | CTCF(Zf)/CD4+-CTCF-ChIP-Seq(Barski_et_al.)/Homer               | 1e-2 | -4.830e+00 | 0.0412 | 1294.0 | 12.49% | 3943.7  | 11.72% | <a href="#">motif file (matrix)</a> | <a href="#">svg</a> |
