# Supplementary material for: AP-2α and AP-2β cooperatively function in the craniofacial surface ectoderm to regulate chromatin and gene expression dynamics during facial development
Source: eLife journal article supplement (doi:10.7554/elife.70511), 2022-03-25
Supplement: supp [file elife-70511-supp-v1.zip]

# Homer Known Motif Enrichment Results (/Users/vanottee/output/)

[Homer de novo Motif Results](#)

[Gene Ontology Enrichment Results](#)

[Known Motif Enrichment Results \(txt file\)](#)

Total Target Sequences = 1454, Total Background Sequences = 47894

| Rank | Motif                                                                               | Name                                                           | P-value | log P-value | q-value (Benjamini) | # Target Sequences with Motif | % of Targets Sequences with Motif | # Background Sequences with Motif | % of Background Sequences with Motif | Motif File                          | SVG                 |
|------|-------------------------------------------------------------------------------------|----------------------------------------------------------------|---------|-------------|---------------------|-------------------------------|-----------------------------------|-----------------------------------|--------------------------------------|-------------------------------------|---------------------|
| 1    |    | Six2(Homeobox)/NephronProgenitor-Six2-ChIP-Seq(GSE39837)/Homer | 1e-97   | -2.248e+02  | 0.0000              | 529.0                         | 36.38%                            | 6796.1                            | 14.19%                               | <a href="#">motif file (matrix)</a> | <a href="#">svg</a> |
| 2    |    | Six1(Homeobox)/Myoblast-Six1-ChIP-Chip(GSE20150)/Homer         | 1e-78   | -1.818e+02  | 0.0000              | 227.0                         | 15.61%                            | 1644.2                            | 3.43%                                | <a href="#">motif file (matrix)</a> | <a href="#">svg</a> |
| 3    |    | TEAD1(TEAD)/HepG2-TEAD1-ChIP-Seq(Encode)/Homer                 | 1e-48   | -1.111e+02  | 0.0000              | 417.0                         | 28.68%                            | 6629.1                            | 13.84%                               | <a href="#">motif file (matrix)</a> | <a href="#">svg</a> |
| 4    |    | TEAD4(TEA)/Tropoblast-Tea4-ChIP-Seq(GSE37350)/Homer            | 1e-44   | -1.020e+02  | 0.0000              | 378.0                         | 26.00%                            | 5929.0                            | 12.38%                               | <a href="#">motif file (matrix)</a> | <a href="#">svg</a> |
| 5    |    | En1(Homeobox)/SUM149-EN1-ChIP-Seq(GSE120957)/Homer             | 1e-43   | -9.969e+01  | 0.0000              | 624.0                         | 42.92%                            | 12486.3                           | 26.07%                               | <a href="#">motif file (matrix)</a> | <a href="#">svg</a> |
| 6    |    | TEAD3(TEA)/HepG2-TEAD3-ChIP-Seq(Encode)/Homer                  | 1e-43   | -9.954e+01  | 0.0000              | 450.0                         | 30.95%                            | 7779.1                            | 16.24%                               | <a href="#">motif file (matrix)</a> | <a href="#">svg</a> |
| 7    |    | TEAD(TEA)/Fibroblast-PU.1-ChIP-Seq(Unpublished)/Homer          | 1e-38   | -8.836e+01  | 0.0000              | 295.0                         | 20.29%                            | 4337.0                            | 9.05%                                | <a href="#">motif file (matrix)</a> | <a href="#">svg</a> |
| 8    |   | DLX5(Homeobox)/BasalGanglia-Dlx5-ChIP-seq(GSE124936)/Homer     | 1e-36   | -8.342e+01  | 0.0000              | 323.0                         | 22.21%                            | 5114.0                            | 10.68%                               | <a href="#">motif file (matrix)</a> | <a href="#">svg</a> |
| 9    |  | Otx2(Homeobox)/EpiLC-Otx2-ChIP-Seq(GSE56098)/Homer             | 1e-35   | -8.289e+01  | 0.0000              | 361.0                         | 24.83%                            | 6047.9                            | 12.63%                               | <a href="#">motif file (matrix)</a> | <a href="#">svg</a> |
| 10   |  | DLX1(Homeobox)/BasalGanglia-Dlx1-ChIP-seq(GSE124936)/Homer     | 1e-34   | -7.918e+01  | 0.0000              | 468.0                         | 32.19%                            | 8930.5                            | 18.64%                               | <a href="#">motif file (matrix)</a> | <a href="#">svg</a> |
| 11   |  | RUNX(Runt)/HPC7-Runx1-ChIP-Seq(GSE22178)/Homer                 | 1e-33   | -7.606e+01  | 0.0000              | 323.0                         | 22.21%                            | 5320.1                            | 11.11%                               | <a href="#">motif file (matrix)</a> | <a href="#">svg</a> |
| 12   |  | DLX2(Homeobox)/BasalGanglia-Dlx2-ChIP-seq(GSE124936)/Homer     | 1e-32   | -7.508e+01  | 0.0000              | 500.0                         | 34.39%                            | 9958.8                            | 20.79%                               | <a href="#">motif file (matrix)</a> | <a href="#">svg</a> |
| 13   |  | Six4(Homeobox)/MCF7-SIX4-ChIP-Seq(Encode)/Homer                | 1e-31   | -7.279e+01  | 0.0000              | 67.0                          | 4.61%                             | 339.8                             | 0.71%                                | <a href="#">motif file (matrix)</a> | <a href="#">svg</a> |
| 14   |  | GSC(Homeobox)/FrogEmbryos-GSC-ChIP-Seq(DRA000576)/Homer        | 1e-30   | -7.057e+01  | 0.0000              | 443.0                         | 30.47%                            | 8581.3                            | 17.91%                               | <a href="#">motif file (matrix)</a> | <a href="#">svg</a> |
| 15   |                                                                                     | Dlx3(Homeobox)/Kerainocytes-Dlx3-ChIP-Seq(GSE89884)/Homer      | 1e-29   | -6.721e+01  | 0.0000              | 266.0                         | 18.29%                            | 4213.1                            | 8.80%                                | <a href="#">motif file</a>          | <a href="#">svg</a> |

|    |                                                                                     |                                                         |       |            |        |       |        |         |        |                                     |                          |  |
|----|-------------------------------------------------------------------------------------|---------------------------------------------------------|-------|------------|--------|-------|--------|---------|--------|-------------------------------------|--------------------------|--|
|    |     |                                                         |       |            |        |       |        |         |        |                                     | <a href="#">(matrix)</a> |  |
| 16 |    | TEAD2(TEA)/Py2T-Tead2-ChIP-Seq(GSE55709)/Homer          | 1e-29 | -6.704e+01 | 0.0000 | 241.0 | 16.57% | 3641.0  | 7.60%  | <a href="#">motif file (matrix)</a> | <a href="#">svg</a>      |  |
| 17 |    | NF1(CTF)/LNCAP-NF1-ChIP-Seq(Unpublished)/Homer          | 1e-27 | -6.240e+01 | 0.0000 | 218.0 | 14.99% | 3238.3  | 6.76%  | <a href="#">motif file (matrix)</a> | <a href="#">svg</a>      |  |
| 18 |    | Rfx2(HTH)/LoVo-RFX2-ChIP-Seq(GSE49402)/Homer            | 1e-26 | -6.136e+01 | 0.0000 | 100.0 | 6.88%  | 906.5   | 1.89%  | <a href="#">motif file (matrix)</a> | <a href="#">svg</a>      |  |
| 19 |    | RFX(HTH)/K562-RFX3-ChIP-Seq(SRA012198)/Homer            | 1e-26 | -6.124e+01 | 0.0000 | 95.0  | 6.53%  | 826.2   | 1.72%  | <a href="#">motif file (matrix)</a> | <a href="#">svg</a>      |  |
| 20 |    | LEF1(HMG)/H1-LEF1-ChIP-Seq(GSE64758)/Homer              | 1e-26 | -6.066e+01 | 0.0000 | 271.0 | 18.64% | 4522.3  | 9.44%  | <a href="#">motif file (matrix)</a> | <a href="#">svg</a>      |  |
| 21 |    | NFY(CCAAT)/Promoter/Homer                               | 1e-24 | -5.725e+01 | 0.0000 | 385.0 | 26.48% | 7551.9  | 15.77% | <a href="#">motif file (matrix)</a> | <a href="#">svg</a>      |  |
| 22 |    | KLF1(Zf)/HUDEP2-KLF1-CutnRun(GSE136251)/Homer           | 1e-24 | -5.706e+01 | 0.0000 | 583.0 | 40.10% | 13151.1 | 27.45% | <a href="#">motif file (matrix)</a> | <a href="#">svg</a>      |  |
| 23 |    | Sox10(HMG)/SciaticNerve-Sox3-ChIP-Seq(GSE35132)/Homer   | 1e-24 | -5.677e+01 | 0.0000 | 527.0 | 36.24% | 11528.2 | 24.07% | <a href="#">motif file (matrix)</a> | <a href="#">svg</a>      |  |
| 24 |    | Sp2(Zf)/HEK293-Sp2.eGFP-ChIP-Seq(Encode)/Homer          | 1e-24 | -5.543e+01 | 0.0000 | 769.0 | 52.89% | 18963.0 | 39.59% | <a href="#">motif file (matrix)</a> | <a href="#">svg</a>      |  |
| 25 |    | Tcf3(HMG)/mES-Tcf3-ChIP-Seq(GSE11724)/Homer             | 1e-23 | -5.388e+01 | 0.0000 | 135.0 | 9.28%  | 1661.0  | 3.47%  | <a href="#">motif file (matrix)</a> | <a href="#">svg</a>      |  |
| 26 |    | RUNX-AML(Runt)/CD4+-PolII-ChIP-Seq(Barski_et_al.)/Homer | 1e-23 | -5.341e+01 | 0.0000 | 280.0 | 19.26% | 4977.8  | 10.39% | <a href="#">motif file (matrix)</a> | <a href="#">svg</a>      |  |
| 27 |   | RUNX1(Runt)/Jurkat-RUNX1-ChIP-Seq(GSE29180)/Homer       | 1e-22 | -5.265e+01 | 0.0000 | 383.0 | 26.34% | 7689.9  | 16.05% | <a href="#">motif file (matrix)</a> | <a href="#">svg</a>      |  |
| 28 |  | Sox3(HMG)/NPC-Sox3-ChIP-Seq(GSE33059)/Homer             | 1e-22 | -5.241e+01 | 0.0000 | 539.0 | 37.07% | 12098.7 | 25.26% | <a href="#">motif file (matrix)</a> | <a href="#">svg</a>      |  |
| 29 |  | LXH9(Homeobox)/Hct116-LXH9.V5-ChIP-Seq(GSE116822)/Homer | 1e-22 | -5.197e+01 | 0.0000 | 450.0 | 30.95% | 9567.3  | 19.97% | <a href="#">motif file (matrix)</a> | <a href="#">svg</a>      |  |
| 30 |  | CREB5(bZIP)/LNCaP-CREB5.V5-ChIP-Seq(GSE13775)/Homer     | 1e-22 | -5.173e+01 | 0.0000 | 169.0 | 11.62% | 2416.2  | 5.04%  | <a href="#">motif file (matrix)</a> | <a href="#">svg</a>      |  |
| 31 |  | X-box(HTH)/NPC-H3K4me1-ChIP-Seq(GSE16256)/Homer         | 1e-22 | -5.148e+01 | 0.0000 | 92.0  | 6.33%  | 898.4   | 1.88%  | <a href="#">motif file (matrix)</a> | <a href="#">svg</a>      |  |
| 32 |  | Sox2(HMG)/mES-Sox2-ChIP-Seq(GSE11431)/Homer             | 1e-22 | -5.098e+01 | 0.0000 | 328.0 | 22.56% | 6295.3  | 13.14% | <a href="#">motif file (matrix)</a> | <a href="#">svg</a>      |  |
| 33 |  | KLF5(Zf)/LoVo-KLF5-ChIP-Seq(GSE49402)/Homer             | 1e-21 | -5.051e+01 | 0.0000 | 702.0 | 48.28% | 17140.3 | 35.78% | <a href="#">motif file (matrix)</a> | <a href="#">svg</a>      |  |

|    |  |                                                          |       |            |        |       |        |         |        |                                     |                     |
|----|--|----------------------------------------------------------|-------|------------|--------|-------|--------|---------|--------|-------------------------------------|---------------------|
| 34 |  | Sp1(Zf)/Promoter/Homer                                   | 1e-21 | -4.988e+01 | 0.0000 | 345.0 | 23.73% | 6788.8  | 14.17% | <a href="#">motif file (matrix)</a> | <a href="#">svg</a> |
| 35 |  | Atf7(bZIP)/3T3L1-Atf7-ChIP-Seq(GSE56872)/Homer           | 1e-21 | -4.952e+01 | 0.0000 | 208.0 | 14.31% | 3357.4  | 7.01%  | <a href="#">motif file (matrix)</a> | <a href="#">svg</a> |
| 36 |  | Rfx1(HTH)/NPC-H3K4me1-ChIP-Seq(GSE16256)/Homer           | 1e-20 | -4.687e+01 | 0.0000 | 131.0 | 9.01%  | 1719.6  | 3.59%  | <a href="#">motif file (matrix)</a> | <a href="#">svg</a> |
| 37 |  | KLF3(Zf)/MEF-Klf3-ChIP-Seq(GSE44748)/Homer               | 1e-20 | -4.653e+01 | 0.0000 | 394.0 | 27.10% | 8265.4  | 17.25% | <a href="#">motif file (matrix)</a> | <a href="#">svg</a> |
| 38 |  | Atf1(bZIP)/K562-ATF1-ChIP-Seq(GSE31477)/Homer            | 1e-20 | -4.613e+01 | 0.0000 | 259.0 | 17.81% | 4708.4  | 9.83%  | <a href="#">motif file (matrix)</a> | <a href="#">svg</a> |
| 39 |  | Lhx2(Homeobox)/HFSC-Lhx2-ChIP-Seq(GSE48068)/Homer        | 1e-19 | -4.545e+01 | 0.0000 | 346.0 | 23.80% | 7005.9  | 14.63% | <a href="#">motif file (matrix)</a> | <a href="#">svg</a> |
| 40 |  | CRX(Homeobox)/Retina-Crx-ChIP-Seq(GSE20012)/Homer        | 1e-19 | -4.511e+01 | 0.0000 | 671.0 | 46.15% | 16506.4 | 34.46% | <a href="#">motif file (matrix)</a> | <a href="#">svg</a> |
| 41 |  | Meis1(Homeobox)/MastCells-Meis1-ChIP-Seq(GSE48085)/Homer | 1e-19 | -4.457e+01 | 0.0000 | 567.0 | 39.00% | 13363.2 | 27.90% | <a href="#">motif file (matrix)</a> | <a href="#">svg</a> |
| 42 |  | Tcf7(HMG)/GM12878-TCF7-ChIP-Seq(Encode)/Homer            | 1e-19 | -4.388e+01 | 0.0000 | 149.0 | 10.25% | 2170.5  | 4.53%  | <a href="#">motif file (matrix)</a> | <a href="#">svg</a> |
| 43 |  | Atf2(bZIP)/3T3L1-Atf2-ChIP-Seq(GSE56872)/Homer           | 1e-18 | -4.192e+01 | 0.0000 | 155.0 | 10.66% | 2353.4  | 4.91%  | <a href="#">motif file (matrix)</a> | <a href="#">svg</a> |
| 44 |  | c-Jun-CRE(bZIP)/K562-cJun-ChIP-Seq(GSE31477)/Homer       | 1e-17 | -4.092e+01 | 0.0000 | 142.0 | 9.77%  | 2090.3  | 4.36%  | <a href="#">motif file (matrix)</a> | <a href="#">svg</a> |
| 45 |  | Tgif1(Homeobox)/mES-Tgif1-ChIP-Seq(GSE55404)/Homer       | 1e-17 | -4.089e+01 | 0.0000 | 792.0 | 54.47% | 20634.1 | 43.07% | <a href="#">motif file (matrix)</a> | <a href="#">svg</a> |
| 46 |  | Lhx3(Homeobox)/Neuron-Lhx3-ChIP-Seq(GSE31456)/Homer      | 1e-17 | -4.073e+01 | 0.0000 | 477.0 | 32.81% | 10928.0 | 22.81% | <a href="#">motif file (matrix)</a> | <a href="#">svg</a> |
| 47 |  | Sox6(HMG)/Myotubes-Sox6-ChIP-Seq(GSE32627)/Homer         | 1e-17 | -4.052e+01 | 0.0000 | 478.0 | 32.87% | 10968.9 | 22.90% | <a href="#">motif file (matrix)</a> | <a href="#">svg</a> |
| 48 |  | Klf4(Zf)/mES-Klf4-ChIP-Seq(GSE11431)/Homer               | 1e-17 | -3.930e+01 | 0.0000 | 260.0 | 17.88% | 4996.6  | 10.43% | <a href="#">motif file (matrix)</a> | <a href="#">svg</a> |
| 49 |  | Sp5(Zf)/mES-Sp5.Flag-ChIP-Seq(GSE72989)/Homer            | 1e-17 | -3.921e+01 | 0.0000 | 612.0 | 42.09% | 15064.9 | 31.45% | <a href="#">motif file (matrix)</a> | <a href="#">svg</a> |
| 50 |  | JunD(bZIP)/K562-JunD-ChIP-Seq/Homer                      | 1e-16 | -3.864e+01 | 0.0000 | 72.0  | 4.95%  | 729.2   | 1.52%  | <a href="#">motif file (matrix)</a> | <a href="#">svg</a> |
| 51 |  | Tlx?(NR)/NPC-H3K4me1-ChIP-Seq(GSE16256)/Homer            | 1e-16 | -3.815e+01 | 0.0000 | 196.0 | 13.48% | 3429.9  | 7.16%  | <a href="#">motif file (matrix)</a> | <a href="#">svg</a> |
| 52 |  | Sox17(HMG)/Endoderm-Sox17-ChIP-Seq(GSE61475)/Homer       | 1e-16 | -3.743e+01 | 0.0000 | 260.0 | 17.88% | 5074.9  | 10.59% | <a href="#">motif file</a>          | <a href="#">svg</a> |

|    |  |                                                              |       |            |        |       |        |         |        |                                     | (matrix)            |  |
|----|--|--------------------------------------------------------------|-------|------------|--------|-------|--------|---------|--------|-------------------------------------|---------------------|--|
| 53 |  | RUNX2(Runt)/PCa-RUNX2-ChIP-Seq(GSE33889)/Homer               | 1e-15 | -3.589e+01 | 0.0000 | 298.0 | 20.50% | 6151.1  | 12.84% | <a href="#">motif file (matrix)</a> | <a href="#">svg</a> |  |
| 54 |  | KLF14(Zf)/HEK293-KLF14.GFP-ChIP-Seq(GSE58341)/Homer          | 1e-15 | -3.489e+01 | 0.0000 | 811.0 | 55.78% | 21695.0 | 45.29% | <a href="#">motif file (matrix)</a> | <a href="#">svg</a> |  |
| 55 |  | Pbx3(Homeobox)/GM12878-PBX3-ChIP-Seq(GSE32465)/Homer         | 1e-15 | -3.455e+01 | 0.0000 | 127.0 | 8.73%  | 1923.4  | 4.02%  | <a href="#">motif file (matrix)</a> | <a href="#">svg</a> |  |
| 56 |  | Tgif2(Homeobox)/mES-Tgif2-ChIP-Seq(GSE55404)/Homer           | 1e-14 | -3.451e+01 | 0.0000 | 830.0 | 57.08% | 22348.1 | 46.65% | <a href="#">motif file (matrix)</a> | <a href="#">svg</a> |  |
| 57 |  | Sox15(HMG)/CPA-Sox15-ChIP-Seq(GSE62909)/Homer                | 1e-14 | -3.400e+01 | 0.0000 | 338.0 | 23.25% | 7342.1  | 15.33% | <a href="#">motif file (matrix)</a> | <a href="#">svg</a> |  |
| 58 |  | Klf9(Zf)/GBM-Klf9-ChIP-Seq(GSE62211)/Homer                   | 1e-14 | -3.349e+01 | 0.0000 | 319.0 | 21.94% | 6843.6  | 14.29% | <a href="#">motif file (matrix)</a> | <a href="#">svg</a> |  |
| 59 |  | KLF6(Zf)/PDAC-KLF6-ChIP-Seq(GSE64557)/Homer                  | 1e-14 | -3.287e+01 | 0.0000 | 577.0 | 39.68% | 14425.6 | 30.11% | <a href="#">motif file (matrix)</a> | <a href="#">svg</a> |  |
| 60 |  | Pknox1(Homeobox)/ES-Prep1-ChIP-Seq(GSE63282)/Homer           | 1e-12 | -2.849e+01 | 0.0000 | 120.0 | 8.25%  | 1935.4  | 4.04%  | <a href="#">motif file (matrix)</a> | <a href="#">svg</a> |  |
| 61 |  | Sox9(HMG)/Limb-SOX9-ChIP-Seq(GSE73225)/Homer                 | 1e-12 | -2.784e+01 | 0.0000 | 288.0 | 19.81% | 6292.0  | 13.13% | <a href="#">motif file (matrix)</a> | <a href="#">svg</a> |  |
| 62 |  | Lhx1(Homeobox)/EmbryoCarcinoma-Lhx1-ChIP-Seq(GSE70957)/Homer | 1e-12 | -2.770e+01 | 0.0000 | 326.0 | 22.42% | 7361.1  | 15.37% | <a href="#">motif file (matrix)</a> | <a href="#">svg</a> |  |
| 63 |  | TCF7L2(HMG)/K562-TCF7L2-ChIP-Seq(GSE29196)/Homer             | 1e-11 | -2.686e+01 | 0.0000 | 52.0  | 3.58%  | 548.7   | 1.15%  | <a href="#">motif file (matrix)</a> | <a href="#">svg</a> |  |
| 64 |  | Nkx6.1(Homeobox)/Islet-Nkx6.1-ChIP-Seq(GSE40975)/Homer       | 1e-11 | -2.649e+01 | 0.0000 | 621.0 | 42.71% | 16282.1 | 33.99% | <a href="#">motif file (matrix)</a> | <a href="#">svg</a> |  |
| 65 |  | Sox4(HMG)/proB-Sox4-ChIP-Seq(GSE50066)/Homer                 | 1e-11 | -2.552e+01 | 0.0000 | 271.0 | 18.64% | 5952.0  | 12.43% | <a href="#">motif file (matrix)</a> | <a href="#">svg</a> |  |
| 66 |  | Sox7(HMG)/ESC-Sox7-ChIP-Seq(GSE133899)/Homer                 | 1e-10 | -2.322e+01 | 0.0000 | 120.0 | 8.25%  | 2106.6  | 4.40%  | <a href="#">motif file (matrix)</a> | <a href="#">svg</a> |  |
| 67 |  | Ronin(THAP)/ES-Thap11-ChIP-Seq(GSE51522)/Homer               | 1e-9  | -2.302e+01 | 0.0000 | 36.0  | 2.48%  | 326.3   | 0.68%  | <a href="#">motif file (matrix)</a> | <a href="#">svg</a> |  |
| 68 |  | NFIL3(bZIP)/HepG2-NFIL3-ChIP-Seq(Encode)/Homer               | 1e-9  | -2.268e+01 | 0.0000 | 189.0 | 13.00% | 3882.0  | 8.10%  | <a href="#">motif file (matrix)</a> | <a href="#">svg</a> |  |
| 69 |  | Isl1(Homeobox)/Neuron-Isl1-ChIP-Seq(GSE31456)/Homer          | 1e-9  | -2.169e+01 | 0.0000 | 511.0 | 35.14% | 13277.8 | 27.72% | <a href="#">motif file (matrix)</a> | <a href="#">svg</a> |  |
| 70 |  | CRE(bZIP)/Promoter/Homer                                     | 1e-9  | -2.149e+01 | 0.0000 | 125.0 | 8.60%  | 2292.2  | 4.79%  | <a href="#">motif file (matrix)</a> | <a href="#">svg</a> |  |



|    |                                                                                     |                                                                   |      |            |        |       |        |         |        |                                     |                     |
|----|-------------------------------------------------------------------------------------|-------------------------------------------------------------------|------|------------|--------|-------|--------|---------|--------|-------------------------------------|---------------------|
| 71 |     | Rfx5(HTH)/GM12878-Rfx5-ChIP-Seq(GSE31477)/Homer                   | 1e-8 | -2.002e+01 | 0.0000 | 151.0 | 10.39% | 3013.3  | 6.29%  | <a href="#">motif file (matrix)</a> | <a href="#">svg</a> |
| 72 |    | GRHL2(CP2)/HBE-GRHL2-ChIP-Seq(GSE46194)/Homer                     | 1e-8 | -1.851e+01 | 0.0000 | 132.0 | 9.08%  | 2592.6  | 5.41%  | <a href="#">motif file (matrix)</a> | <a href="#">svg</a> |
| 73 |    | GFY(?)/Promoter/Homer                                             | 1e-7 | -1.829e+01 | 0.0000 | 46.0  | 3.16%  | 583.1   | 1.22%  | <a href="#">motif file (matrix)</a> | <a href="#">svg</a> |
| 74 |    | IRF4(IRF)/GM12878-IRF4-ChIP-Seq(GSE32465)/Homer                   | 1e-7 | -1.776e+01 | 0.0000 | 138.0 | 9.49%  | 2782.3  | 5.81%  | <a href="#">motif file (matrix)</a> | <a href="#">svg</a> |
| 75 |    | Pitx1(Homeobox)/Chicken-Pitx1-ChIP-Seq(GSE38910)/Homer            | 1e-7 | -1.720e+01 | 0.0000 | 910.0 | 62.59% | 26617.9 | 55.57% | <a href="#">motif file (matrix)</a> | <a href="#">svg</a> |
| 76 |    | CHR(?)/Hela-CellCycle-Expression/Homer                            | 1e-7 | -1.679e+01 | 0.0000 | 171.0 | 11.76% | 3710.9  | 7.75%  | <a href="#">motif file (matrix)</a> | <a href="#">svg</a> |
| 77 |    | PBX1(Homeobox)/MCF7-PBX1-ChIP-Seq(GSE28007)/Homer                 | 1e-6 | -1.585e+01 | 0.0000 | 48.0  | 3.30%  | 677.8   | 1.41%  | <a href="#">motif file (matrix)</a> | <a href="#">svg</a> |
| 78 |    | PBX2(Homeobox)/K562-PBX2-ChIP-Seq(Encode)/Homer                   | 1e-6 | -1.560e+01 | 0.0000 | 223.0 | 15.34% | 5230.9  | 10.92% | <a href="#">motif file (matrix)</a> | <a href="#">svg</a> |
| 79 |    | Oct4:Sox17(POU,Homeobox,HMG)/F9-Sox17-ChIP-Seq(GSE44553)/Homer    | 1e-6 | -1.524e+01 | 0.0000 | 50.0  | 3.44%  | 735.9   | 1.54%  | <a href="#">motif file (matrix)</a> | <a href="#">svg</a> |
| 80 |    | Pax7(Paired,Homeobox),long/Myoblast-Pax7-ChIP-Seq(GSE25064)/Homer | 1e-6 | -1.489e+01 | 0.0000 | 17.0  | 1.17%  | 121.7   | 0.25%  | <a href="#">motif file (matrix)</a> | <a href="#">svg</a> |
| 81 |    | Tbet(T-box)/CD8-Tbet-ChIP-Seq(GSE33802)/Homer                     | 1e-6 | -1.474e+01 | 0.0000 | 277.0 | 19.05% | 6851.2  | 14.30% | <a href="#">motif file (matrix)</a> | <a href="#">svg</a> |
| 82 |   | Smad3(MAD)/NPC-Smad3-ChIP-Seq(GSE36673)/Homer                     | 1e-6 | -1.438e+01 | 0.0000 | 774.0 | 53.23% | 22428.9 | 46.82% | <a href="#">motif file (matrix)</a> | <a href="#">svg</a> |
| 83 |  | Tbx21(T-box)/GM12878-TBX21-ChIP-Seq(Encode)/Homer                 | 1e-6 | -1.409e+01 | 0.0000 | 259.0 | 17.81% | 6379.9  | 13.32% | <a href="#">motif file (matrix)</a> | <a href="#">svg</a> |
| 84 |  | NF1-halfsite(CTF)/LNCaP-NF1-ChIP-Seq(Unpublished)/Homer           | 1e-6 | -1.395e+01 | 0.0000 | 509.0 | 35.01% | 13977.0 | 29.18% | <a href="#">motif file (matrix)</a> | <a href="#">svg</a> |
| 85 |  | EKLF(Zf)/Erythrocyte-Klf1-ChIP-Seq(GSE20478)/Homer                | 1e-5 | -1.359e+01 | 0.0000 | 97.0  | 6.67%  | 1919.0  | 4.01%  | <a href="#">motif file (matrix)</a> | <a href="#">svg</a> |
| 86 |  | Maz(Zf)/HepG2-Maz-ChIP-Seq(GSE31477)/Homer                        | 1e-5 | -1.339e+01 | 0.0000 | 635.0 | 43.67% | 18038.3 | 37.66% | <a href="#">motif file (matrix)</a> | <a href="#">svg</a> |
| 87 |  | Eomes(T-box)/H9-Eomes-ChIP-Seq(GSE26097)/Homer                    | 1e-5 | -1.338e+01 | 0.0000 | 506.0 | 34.80% | 13947.4 | 29.12% | <a href="#">motif file (matrix)</a> | <a href="#">svg</a> |
| 88 |  | KLF10(Zf)/HEK293-KLF10.GFP-ChIP-Seq(GSE58341)/Homer               | 1e-5 | -1.335e+01 | 0.0000 | 309.0 | 21.25% | 7918.3  | 16.53% | <a href="#">motif file (matrix)</a> | <a href="#">svg</a> |
| 89 |  | GFY-Staff(?),Zf)/Promoter/Homer                                   | 1e-5 | -1.326e+01 | 0.0000 | 42.0  | 2.89%  | 612.3   | 1.28%  | <a href="#">motif file</a>          | <a href="#">svg</a> |

|     |                                                                                     |                                                                          |      |            |        |       |        |         |        |                                                        |                     |
|-----|-------------------------------------------------------------------------------------|--------------------------------------------------------------------------|------|------------|--------|-------|--------|---------|--------|--------------------------------------------------------|---------------------|
|     |                                                                                     |                                                                          |      |            |        |       |        |         |        | <a href="#">(matrix)</a>                               |                     |
| 90  |    | Tbr1(T-box)/Cortex-Tbr1-ChIP-Seq(GSE71384)/Homer                         | 1e-5 | -1.198e+01 | 0.0000 | 340.0 | 23.38% | 8984.4  | 18.76% | <a href="#">motif file</a><br><a href="#">(matrix)</a> | <a href="#">svg</a> |
| 91  |    | Hoxa10(Homeobox)/ChickenMSG-Hoxa10.Flag-ChIP-Seq(GSE86088)/Homer         | 1e-5 | -1.163e+01 | 0.0000 | 150.0 | 10.32% | 3453.6  | 7.21%  | <a href="#">motif file</a><br><a href="#">(matrix)</a> | <a href="#">svg</a> |
| 92  |    | MITF(bHLH)/MastCells-MITF-ChIP-Seq(GSE48085)/Homer                       | 1e-4 | -1.118e+01 | 0.0001 | 277.0 | 19.05% | 7172.0  | 14.97% | <a href="#">motif file</a><br><a href="#">(matrix)</a> | <a href="#">svg</a> |
| 93  |    | PAX3:FKHR-fusion(Paired,Homeobox)/Rh4-PAX3:FKHR-ChIP-Seq(GSE19063)/Homer | 1e-4 | -1.097e+01 | 0.0001 | 73.0  | 5.02%  | 1426.2  | 2.98%  | <a href="#">motif file</a><br><a href="#">(matrix)</a> | <a href="#">svg</a> |
| 94  |    | Prop1(Homeobox)/GHFT1-PROP1.biotin-ChIP-Seq(GSE77302)/Homer              | 1e-4 | -1.090e+01 | 0.0001 | 152.0 | 10.45% | 3560.2  | 7.43%  | <a href="#">motif file</a><br><a href="#">(matrix)</a> | <a href="#">svg</a> |
| 95  |    | Gfi1b(Zf)/HPC7-Gfi1b-ChIP-Seq(GSE22178)/Homer                            | 1e-4 | -1.078e+01 | 0.0001 | 186.0 | 12.79% | 4537.3  | 9.47%  | <a href="#">motif file</a><br><a href="#">(matrix)</a> | <a href="#">svg</a> |
| 96  |    | Phox2a(Homeobox)/Neuron-Phox2a-ChIP-Seq(GSE31456)/Homer                  | 1e-4 | -1.009e+01 | 0.0002 | 101.0 | 6.95%  | 2206.6  | 4.61%  | <a href="#">motif file</a><br><a href="#">(matrix)</a> | <a href="#">svg</a> |
| 97  |    | Nanog(Homeobox)/mES-Nanog-ChIP-Seq(GSE11724)/Homer                       | 1e-4 | -1.007e+01 | 0.0002 | 911.0 | 62.65% | 27570.4 | 57.55% | <a href="#">motif file</a><br><a href="#">(matrix)</a> | <a href="#">svg</a> |
| 98  |    | Atf3(bZIP)/GBM-ATF3-ChIP-Seq(GSE33912)/Homer                             | 1e-4 | -9.384e+00 | 0.0004 | 159.0 | 10.94% | 3875.1  | 8.09%  | <a href="#">motif file</a><br><a href="#">(matrix)</a> | <a href="#">svg</a> |
| 99  |    | HLF(bZIP)/HSC-HLF.Flag-ChIP-Seq(GSE69817)/Homer                          | 1e-4 | -9.212e+00 | 0.0004 | 195.0 | 13.41% | 4934.7  | 10.30% | <a href="#">motif file</a><br><a href="#">(matrix)</a> | <a href="#">svg</a> |
| 100 |   | CEBP:AP1(bZIP)/ThioMac-CEBPb-ChIP-Seq(GSE21512)/Homer                    | 1e-3 | -9.123e+00 | 0.0005 | 179.0 | 12.31% | 4475.8  | 9.34%  | <a href="#">motif file</a><br><a href="#">(matrix)</a> | <a href="#">svg</a> |
| 101 |  | Fra1(bZIP)/BT549-Fra1-ChIP-Seq(GSE46166)/Homer                           | 1e-3 | -9.097e+00 | 0.0005 | 135.0 | 9.28%  | 3215.0  | 6.71%  | <a href="#">motif file</a><br><a href="#">(matrix)</a> | <a href="#">svg</a> |
| 102 |  | Phox2b(Homeobox)/CLBGA-PHOX2B-ChIP-Seq(GSE90683)/Homer                   | 1e-3 | -8.764e+00 | 0.0007 | 58.0  | 3.99%  | 1144.5  | 2.39%  | <a href="#">motif file</a><br><a href="#">(matrix)</a> | <a href="#">svg</a> |
| 103 |  | HOXA1(Homeobox)/mES-Hoxa1-ChIP-Seq(SRP084292)/Homer                      | 1e-3 | -8.608e+00 | 0.0008 | 74.0  | 5.09%  | 1568.6  | 3.27%  | <a href="#">motif file</a><br><a href="#">(matrix)</a> | <a href="#">svg</a> |
| 104 |  | Snail1(Zf)/LS174T-SNAIL1.HA-ChIP-Seq(GSE127183)/Homer                    | 1e-3 | -8.573e+00 | 0.0008 | 311.0 | 21.39% | 8485.4  | 17.71% | <a href="#">motif file</a><br><a href="#">(matrix)</a> | <a href="#">svg</a> |
| 105 |  | Pdx1(Homeobox)/Islet-Pdx1-ChIP-Seq(SRA008281)/Homer                      | 1e-3 | -8.445e+00 | 0.0009 | 222.0 | 15.27% | 5808.9  | 12.13% | <a href="#">motif file</a><br><a href="#">(matrix)</a> | <a href="#">svg</a> |
| 106 |  | TATA-Box(TBP)/Promoter/Homer                                             | 1e-3 | -8.307e+00 | 0.0010 | 335.0 | 23.04% | 9256.1  | 19.32% | <a href="#">motif file</a><br><a href="#">(matrix)</a> | <a href="#">svg</a> |
| 107 |                                                                                     | Smad2(MAD)/ES-SMAD2-ChIP-Seq(GSE29422)/Homer                             | 1e-3 | -8.275e+00 | 0.0010 | 476.0 | 32.74% | 13669.8 | 28.54% | <a href="#">motif file</a>                             | <a href="#">svg</a> |

|     |                                                                                     |                                                                  |      |            |        |       |        |         |        |                                     |                          |  |
|-----|-------------------------------------------------------------------------------------|------------------------------------------------------------------|------|------------|--------|-------|--------|---------|--------|-------------------------------------|--------------------------|--|
|     |     |                                                                  |      |            |        |       |        |         |        |                                     | <a href="#">(matrix)</a> |  |
| 108 |    | PAX6(Paired,Homeobox)/Forebrain-Pax6-ChIP-Seq(GSE66961)/Homer    | 1e-3 | -7.372e+00 | 0.0025 | 36.0  | 2.48%  | 653.6   | 1.36%  | <a href="#">motif file (matrix)</a> | <a href="#">svg</a>      |  |
| 109 |    | E2A(bHLH)/proBcell-E2A-ChIP-Seq(GSE21978)/Homer                  | 1e-3 | -7.055e+00 | 0.0035 | 471.0 | 32.39% | 13702.2 | 28.60% | <a href="#">motif file (matrix)</a> | <a href="#">svg</a>      |  |
| 110 |    | Foxh1(Forkhead)/hESC-FOXH1-ChIP-Seq(GSE29422)/Homer              | 1e-3 | -6.977e+00 | 0.0037 | 149.0 | 10.25% | 3798.1  | 7.93%  | <a href="#">motif file (matrix)</a> | <a href="#">svg</a>      |  |
| 111 |    | JunB(bZIP)/DendriticCells-Junb-ChIP-Seq(GSE36099)/Homer          | 1e-3 | -6.919e+00 | 0.0039 | 130.0 | 8.94%  | 3250.3  | 6.79%  | <a href="#">motif file (matrix)</a> | <a href="#">svg</a>      |  |
| 112 |    | Brachyury(T-box)/Mesoendoderm-Brachyury-ChIP-exo(GSE54963)/Homer | 1e-2 | -6.811e+00 | 0.0043 | 79.0  | 5.43%  | 1812.2  | 3.78%  | <a href="#">motif file (matrix)</a> | <a href="#">svg</a>      |  |
| 113 |    | Tbx20(T-box)/Heart-Tbx20-ChIP-Seq(GSE29636)/Homer                | 1e-2 | -6.791e+00 | 0.0044 | 72.0  | 4.95%  | 1621.1  | 3.38%  | <a href="#">motif file (matrix)</a> | <a href="#">svg</a>      |  |
| 114 |    | CEBP(bZIP)/ThioMac-CEBPb-ChIP-Seq(GSE21512)/Homer                | 1e-2 | -6.722e+00 | 0.0046 | 152.0 | 10.45% | 3911.3  | 8.17%  | <a href="#">motif file (matrix)</a> | <a href="#">svg</a>      |  |
| 115 |    | BATF(bZIP)/Th17-BATF-ChIP-Seq(GSE39756)/Homer                    | 1e-2 | -6.470e+00 | 0.0059 | 153.0 | 10.52% | 3966.4  | 8.28%  | <a href="#">motif file (matrix)</a> | <a href="#">svg</a>      |  |
| 116 |    | GATA(Zf),IR4/iTreg-Gata3-ChIP-Seq(GSE20898)/Homer                | 1e-2 | -6.444e+00 | 0.0060 | 26.0  | 1.79%  | 446.8   | 0.93%  | <a href="#">motif file (matrix)</a> | <a href="#">svg</a>      |  |
| 117 |    | Hoxa9(Homeobox)/ChickenMSG-Hoxa9.Flag-ChIP-Seq(GSE86088)/Homer   | 1e-2 | -6.320e+00 | 0.0067 | 599.0 | 41.20% | 17938.4 | 37.45% | <a href="#">motif file (matrix)</a> | <a href="#">svg</a>      |  |
| 118 |    | AP-1(bZIP)/ThioMac-PU.1-ChIP-Seq(GSE21512)/Homer                 | 1e-2 | -6.273e+00 | 0.0070 | 168.0 | 11.55% | 4432.4  | 9.25%  | <a href="#">motif file (matrix)</a> | <a href="#">svg</a>      |  |
| 119 |    | Nkx2.2(Homeobox)/NPC-Nkx2.2-ChIP-Seq(GSE61673)/Homer             | 1e-2 | -6.203e+00 | 0.0074 | 525.0 | 36.11% | 15575.1 | 32.51% | <a href="#">motif file (matrix)</a> | <a href="#">svg</a>      |  |
| 120 |   | ZNF7(Zf)/HepG2-ZNF7.Flag-ChIP-Seq(Encode)/Homer                  | 1e-2 | -6.148e+00 | 0.0078 | 141.0 | 9.70%  | 3645.1  | 7.61%  | <a href="#">motif file (matrix)</a> | <a href="#">svg</a>      |  |
| 121 |  | Smad4(MAD)/ESC-SMAD4-ChIP-Seq(GSE29422)/Homer                    | 1e-2 | -6.123e+00 | 0.0079 | 481.0 | 33.08% | 14181.2 | 29.60% | <a href="#">motif file (matrix)</a> | <a href="#">svg</a>      |  |
| 122 |  | Tbx5(T-box)/HL1-Tbx5.biotin-ChIP-Seq(GSE21529)/Homer             | 1e-2 | -5.998e+00 | 0.0089 | 772.0 | 53.09% | 23653.3 | 49.38% | <a href="#">motif file (matrix)</a> | <a href="#">svg</a>      |  |
| 123 |  | NFkB-p65-Rel(RHD)/ThioMac-LPS-Expression(GSE23622)/Homer         | 1e-2 | -5.917e+00 | 0.0096 | 21.0  | 1.44%  | 346.9   | 0.72%  | <a href="#">motif file (matrix)</a> | <a href="#">svg</a>      |  |
| 124 |  | Mef2d(MADS)/Retina-Mef2d-ChIP-Seq(GSE61391)/Homer                | 1e-2 | -5.824e+00 | 0.0104 | 47.0  | 3.23%  | 1004.0  | 2.10%  | <a href="#">motif file (matrix)</a> | <a href="#">svg</a>      |  |
| 125 |  | MyoG(bHLH)/C2C12-MyoG-ChIP-Seq(GSE36024)/Homer                   | 1e-2 | -5.783e+00 | 0.0108 | 332.0 | 22.83% | 9527.9  | 19.89% | <a href="#">motif file (matrix)</a> | <a href="#">svg</a>      |  |

|     |  |                                                               |      |            |        |       |        |         |        |                                     |                     |
|-----|--|---------------------------------------------------------------|------|------------|--------|-------|--------|---------|--------|-------------------------------------|---------------------|
| 126 |  | Hoxb4(Homeobox)/ES-Hoxb4-ChIP-Seq(GSE34014)/Homer             | 1e-2 | -5.733e+00 | 0.0113 | 54.0  | 3.71%  | 1197.4  | 2.50%  | <a href="#">motif file (matrix)</a> | <a href="#">svg</a> |
| 127 |  | E-box(bHLH)/Promoter/Homer                                    | 1e-2 | -5.509e+00 | 0.0140 | 43.0  | 2.96%  | 915.3   | 1.91%  | <a href="#">motif file (matrix)</a> | <a href="#">svg</a> |
| 128 |  | OCT:OCT-short(POU,Homeobox)/NPC-OCT6-ChIP-Seq(GSE43916)/Homer | 1e-2 | -5.494e+00 | 0.0141 | 152.0 | 10.45% | 4042.9  | 8.44%  | <a href="#">motif file (matrix)</a> | <a href="#">svg</a> |
| 129 |  | HOXA2(Homeobox)/mES-Hoxa2-ChIP-Seq(Donaldson_et_al.)/Homer    | 1e-2 | -5.333e+00 | 0.0164 | 32.0  | 2.20%  | 637.7   | 1.33%  | <a href="#">motif file (matrix)</a> | <a href="#">svg</a> |
| 130 |  | Barx1(Homeobox)/Stomach-Barx1.3xFlag-ChIP-Seq(GSE69483)/Homer | 1e-2 | -5.318e+00 | 0.0165 | 117.0 | 8.05%  | 3023.8  | 6.31%  | <a href="#">motif file (matrix)</a> | <a href="#">svg</a> |
| 131 |  | TRPS1(Zf)/MCF7-TRPS1-ChIP-Seq(GSE107013)/Homer                | 1e-2 | -5.252e+00 | 0.0175 | 419.0 | 28.82% | 12366.3 | 25.82% | <a href="#">motif file (matrix)</a> | <a href="#">svg</a> |
| 132 |  | Bapx1(Homeobox)/VertebralCol-Bapx1-ChIP-Seq(GSE36672)/Homer   | 1e-2 | -5.219e+00 | 0.0180 | 544.0 | 37.41% | 16378.7 | 34.19% | <a href="#">motif file (matrix)</a> | <a href="#">svg</a> |
| 133 |  | PRDM14(Zf)/H1-PRDM14-ChIP-Seq(GSE22767)/Homer                 | 1e-2 | -5.146e+00 | 0.0192 | 96.0  | 6.60%  | 2426.8  | 5.07%  | <a href="#">motif file (matrix)</a> | <a href="#">svg</a> |
| 134 |  | Hand2(bHLH)/Mesoderm-Hand2-ChIP-Seq(GSE61475)/Homer           | 1e-2 | -5.094e+00 | 0.0200 | 135.0 | 9.28%  | 3580.2  | 7.47%  | <a href="#">motif file (matrix)</a> | <a href="#">svg</a> |
| 135 |  | NF1:FOXA1(CTF,Forkhead)/LNCAP-FOXA1-ChIP-Seq(GSE27824)/Homer  | 1e-2 | -5.044e+00 | 0.0209 | 17.0  | 1.17%  | 280.9   | 0.59%  | <a href="#">motif file (matrix)</a> | <a href="#">svg</a> |
| 136 |  | p63(p53)/Keratinocyte-p63-ChIP-Seq(GSE17611)/Homer            | 1e-2 | -5.038e+00 | 0.0209 | 111.0 | 7.63%  | 2875.5  | 6.00%  | <a href="#">motif file (matrix)</a> | <a href="#">svg</a> |
| 137 |  | Fra2(bZIP)/Striatum-Fra2-ChIP-Seq(GSE43429)/Homer             | 1e-2 | -5.023e+00 | 0.0210 | 107.0 | 7.36%  | 2759.2  | 5.76%  | <a href="#">motif file (matrix)</a> | <a href="#">svg</a> |
| 138 |  | Rbpj1(?)/Panc1-Rbpj1-ChIP-Seq(GSE47459)/Homer                 | 1e-2 | -5.008e+00 | 0.0212 | 368.0 | 25.31% | 10794.2 | 22.53% | <a href="#">motif file (matrix)</a> | <a href="#">svg</a> |
| 139 |  | Tbx6(T-box)/ESC-Tbx6-ChIP-Seq(GSE93524)/Homer                 | 1e-2 | -4.919e+00 | 0.0230 | 268.0 | 18.43% | 7670.8  | 16.01% | <a href="#">motif file (matrix)</a> | <a href="#">svg</a> |
| 140 |  | Stat3+il21(Stat)/CD4-Stat3-ChIP-Seq(GSE19198)/Homer           | 1e-2 | -4.889e+00 | 0.0235 | 193.0 | 13.27% | 5359.2  | 11.19% | <a href="#">motif file (matrix)</a> | <a href="#">svg</a> |
| 141 |  | Rfx6(HTH)/Min6b1-Rfx6.HA-ChIP-Seq(GSE62844)/Homer             | 1e-2 | -4.840e+00 | 0.0246 | 341.0 | 23.45% | 9972.5  | 20.82% | <a href="#">motif file (matrix)</a> | <a href="#">svg</a> |
| 142 |  | Nkx2.5(Homeobox)/HL1-Nkx2.5.biotin-ChIP-Seq(GSE21529)/Homer   | 1e-2 | -4.803e+00 | 0.0253 | 556.0 | 38.24% | 16854.9 | 35.19% | <a href="#">motif file (matrix)</a> | <a href="#">svg</a> |
| 143 |  | TFE3(bHLH)/MEF-TFE3-ChIP-Seq(GSE75757)/Homer                  | 1e-2 | -4.763e+00 | 0.0262 | 35.0  | 2.41%  | 743.1   | 1.55%  | <a href="#">motif file (matrix)</a> | <a href="#">svg</a> |
| 144 |  | Myf5(bHLH)/GM-Myf5-ChIP-Seq(GSE24852)/Homer                   | 1e-2 | -4.753e+00 | 0.0262 | 216.0 | 14.86% | 6085.2  | 12.70% | <a href="#">motif file</a>          | <a href="#">svg</a> |



|  |  |  |  |  |  |  |  |  |  |                          |  |
|--|--|--|--|--|--|--|--|--|--|--------------------------|--|
|  |  |  |  |  |  |  |  |  |  | <a href="#">(matrix)</a> |  |
|--|--|--|--|--|--|--|--|--|--|--------------------------|--|
