# Supplementary material for: AP-2α and AP-2β cooperatively function in the craniofacial surface ectoderm to regulate chromatin and gene expression dynamics during facial development
Source: eLife journal article supplement (doi:10.7554/elife.70511), 2022-03-25
Supplement: supp [file elife-70511-supp-v1.zip]

⊕ Job Description

⊕ Region-Gene Association Graphs

What do these graphs illustrate?

Number of associated genes per region

[Download as PDF.](#)

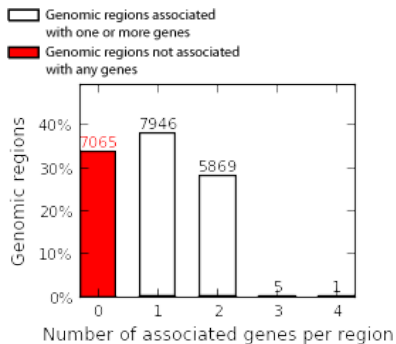

Binned by orientation and distance to TSS

[Download as PDF.](#)

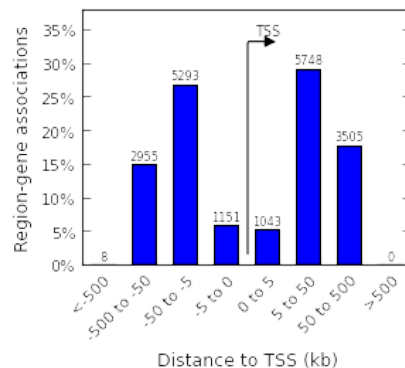

Binned by absolute distance to TSS

[Download as PDF.](#)

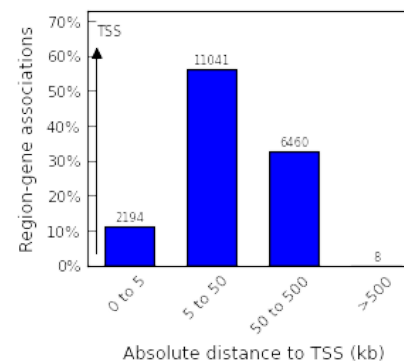

⊕ Global Controls

Global Export

Which data is exported by each option?

⊕ Ensembl Genes (no terms)

Global controls

⊖ GO Biological Process (20+ terms)

Global controls

Table controls:

Shown top rows in this table:

Term annotation count: Min:  Max:

Visualize this table:

| Term Name                                                | Binom Rank | Binom Raw P-Value | Binom FDR Q-Val | Binom Fold Enrichment | Binom Observed Region Hits | Binom Region Set Coverage | Hyper Rank | Hyper FDR Q-Val | Hyper Fold Enrichment | Hyper Observed Gene Hits | Hyper Total Genes | Hyper Gene Set Coverage |
|----------------------------------------------------------|------------|-------------------|-----------------|-----------------------|----------------------------|---------------------------|------------|-----------------|-----------------------|--------------------------|-------------------|-------------------------|
| <a href="#">skin development</a>                         | 117        | 3.5355e-51        | 3.9555e-49      | 2.2042                | 456                        | 2.18%                     | 245        | 2.6325e-10      | 1.4902                | 162                      | 246               | 1.71%                   |
| <a href="#">tube formation</a>                           | 210        | 2.5797e-32        | 1.6080e-30      | 2.0208                | 347                        | 1.66%                     | 307        | 9.6779e-9       | 1.5497                | 113                      | 165               | 1.20%                   |
| <a href="#">embryonic limb morphogenesis</a>             | 234        | 3.5163e-30        | 1.9670e-28      | 2.0205                | 323                        | 1.55%                     | 338        | 2.8346e-8       | 1.5714                | 100                      | 144               | 1.06%                   |
| <a href="#">gland morphogenesis</a>                      | 244        | 2.2338e-29        | 1.1984e-27      | 2.0307                | 310                        | 1.48%                     | 350        | 5.9832e-8       | 1.5983                | 89                       | 126               | 0.94%                   |
| <a href="#">hair cycle</a>                               | 265        | 3.7487e-27        | 1.8517e-25      | 2.2357                | 228                        | 1.09%                     | 432        | 1.2715e-6       | 1.6163                | 70                       | 98                | 0.74%                   |
| <a href="#">odontogenesis</a>                            | 266        | 3.7995e-27        | 1.8698e-25      | 2.1305                | 254                        | 1.22%                     | 494        | 6.3188e-6       | 1.5584                | 73                       | 106               | 0.77%                   |
| <a href="#">odontogenesis of dentin-containing tooth</a> | 267        | 7.6039e-27        | 3.7279e-25      | 2.3054                | 211                        | 1.01%                     | 551        | 3.3132e-5       | 1.6040                | 56                       | 79                | 0.59%                   |
| <a href="#">cranial skeletal system development</a>      | 281        | 1.8479e-25        | 8.6084e-24      | 2.4833                | 172                        | 0.82%                     | 620        | 1.6814e-4       | 1.6114                | 47                       | 66                | 0.50%                   |
| <a href="#">somatic stem cell population maintenance</a> | 288        | 6.9481e-25        | 3.1580e-23      | 2.6611                | 148                        | 0.71%                     | 511        | 1.0952e-5       | 1.8010                | 39                       | 49                | 0.41%                   |
| <a href="#">hair cycle process</a>                       | 297        | 1.4597e-24        | 6.4336e-23      | 2.2009                | 212                        | 1.02%                     | 438        | 1.5526e-6       | 1.6457                | 64                       | 88                | 0.68%                   |
| <a href="#">hair follicle development</a>                | 307        | 3.8710e-24        | 1.6505e-22      | 2.2109                | 206                        | 0.99%                     | 492        | 6.2440e-6       | 1.6239                | 61                       | 85                | 0.65%                   |

| Term Name                                             | Binom Rank | Binom Raw P-Value | Binom FDR Q-Val | Binom Fold Enrichment | Binom Observed Region Hits | Binom Region Set Coverage | Hyper Rank | Hyper FDR Q-Val | Hyper Fold Enrichment | Hyper Observed Gene Hits | Hyper Total Genes | Hyper Gene Set Coverage |
|-------------------------------------------------------|------------|-------------------|-----------------|-----------------------|----------------------------|---------------------------|------------|-----------------|-----------------------|--------------------------|-------------------|-------------------------|
| canonical Wnt signaling pathway                       | 310        | 4.5065e-24        | 1.9029e-22      | 2.1574                | 217                        | 1.04%                     | 520        | 1.3583e-5       | 1.5721                | 66                       | 95                | 0.70%                   |
| mesoderm development                                  | 318        | 1.3298e-23        | 5.4741e-22      | 2.0670                | 235                        | 1.13%                     | 356        | 8.5380e-8       | 1.6309                | 80                       | 111               | 0.85%                   |
| skin epidermis development                            | 321        | 1.7286e-23        | 7.0492e-22      | 2.1819                | 206                        | 0.99%                     | 532        | 2.1533e-5       | 1.5866                | 61                       | 87                | 0.65%                   |
| non-canonical Wnt signaling pathway                   | 359        | 8.1133e-21        | 2.9583e-19      | 2.9309                | 104                        | 0.50%                     | 938        | 4.1173e-3       | 1.6810                | 26                       | 35                | 0.27%                   |
| embryonic skeletal system morphogenesis               | 364        | 2.0555e-20        | 7.3919e-19      | 2.1348                | 186                        | 0.89%                     | 1,138      | 1.1970e-2       | 1.3577                | 60                       | 100               | 0.63%                   |
| keratinocyte differentiation                          | 401        | 6.8715e-19        | 2.2431e-17      | 2.2360                | 154                        | 0.74%                     | 1,459      | 4.6046e-2       | 1.2843                | 63                       | 111               | 0.67%                   |
| positive regulation of mesenchymal cell proliferation | 413        | 1.3606e-18        | 4.3123e-17      | 2.3970                | 131                        | 0.63%                     | 465        | 3.2924e-6       | 1.9570                | 32                       | 37                | 0.34%                   |
| embryonic hindlimb morphogenesis                      | 419        | 3.8616e-18        | 1.2064e-16      | 2.4837                | 119                        | 0.57%                     | 1,016      | 6.4749e-3       | 1.6638                | 25                       | 34                | 0.26%                   |
| regulation of mesenchymal cell proliferation          | 422        | 5.2678e-18        | 1.6340e-16      | 2.2509                | 144                        | 0.69%                     | 421        | 8.9362e-7       | 1.9108                | 38                       | 45                | 0.40%                   |

The test set of 20,886 genomic regions picked 9,455 (44%) of all 21,395 genes.  
 GO Biological Process has 13,090 terms covering 17,925 (84%) of all 21,395 genes, and 1,163,819 term - gene associations.  
 13,090 ontology terms (100%) were tested using an annotation count range of [1, Inf].

GO Cellular Component (5 terms)

Global controls

Table controls:   Shown top rows in this table:   Term annotation count: Min:  Max:   Visualize this table:

| Term Name             | Binom Rank | Binom Raw P-Value | Binom FDR Q-Val | Binom Fold Enrichment | Binom Observed Region Hits | Binom Region Set Coverage | Hyper Rank | Hyper FDR Q-Val | Hyper Fold Enrichment | Hyper Observed Gene Hits | Hyper Total Genes | Hyper Gene Set Coverage |
|-----------------------|------------|-------------------|-----------------|-----------------------|----------------------------|---------------------------|------------|-----------------|-----------------------|--------------------------|-------------------|-------------------------|
| actin filament bundle | 72         | 4.6695e-13        | 1.0986e-11      | 2.0033                | 132                        | 0.63%                     | 143        | 2.3533e-2       | 1.3949                | 45                       | 73                | 0.48%                   |
| desmosome             | 116        | 8.0699e-8         | 1.1785e-6       | 2.2624                | 54                         | 0.26%                     | 87         | 8.4850e-4       | 1.8587                | 23                       | 28                | 0.24%                   |
| laminin complex       | 184        | 9.1010e-5         | 8.3788e-4       | 2.7912                | 19                         | 0.09%                     | 137        | 1.7958e-2       | 2.2628                | 8                        | 8                 | 0.08%                   |
| Golgi cis cisterna    | 236        | 6.1781e-4         | 4.4346e-3       | 2.8357                | 14                         | 0.07%                     | 137        | 1.7958e-2       | 2.2628                | 8                        | 8                 | 0.08%                   |
| growth cone membrane  | 289        | 3.1616e-3         | 1.8532e-2       | 2.1601                | 17                         | 0.08%                     | 156        | 3.5702e-2       | 2.2628                | 7                        | 7                 | 0.07%                   |

The test set of 20,886 genomic regions picked 9,455 (44%) of all 21,395 genes.  
 GO Cellular Component has 1,694 terms covering 19,074 (89%) of all 21,395 genes, and 371,380 term - gene associations.  
 1,694 ontology terms (100%) were tested using an annotation count range of [1, Inf].

GO Molecular Function (3 terms)

Global controls

Table controls:   Shown top rows in this table:   Term annotation count: Min:  Max:   Visualize this table:

| Term Name        | Binom Rank | Binom Raw P-Value | Binom FDR Q-Val | Binom Fold Enrichment | Binom Observed Region Hits | Binom Region Set Coverage | Hyper Rank | Hyper FDR Q-Val | Hyper Fold Enrichment | Hyper Observed Gene Hits | Hyper Total Genes | Hyper Gene Set Coverage |
|------------------|------------|-------------------|-----------------|-----------------------|----------------------------|---------------------------|------------|-----------------|-----------------------|--------------------------|-------------------|-------------------------|
| frizzled binding | 44         | 3.5313e-17        | 3.3154e-15      | 2.6284                | 101                        | 0.48%                     | 110        | 2.7639e-2       | 1.6078                | 27                       | 38                | 0.29%                   |

| Term Name          | Binom Rank | Binom Raw P-Value | Binom FDR Q-Val | Binom Fold Enrichment | Binom Observed Region Hits | Binom Region Set Coverage | Hyper Rank | Hyper FDR Q-Val | Hyper Fold Enrichment | Hyper Observed Gene Hits | Hyper Total Genes | Hyper Gene Set Coverage |
|--------------------|------------|-------------------|-----------------|-----------------------|----------------------------|---------------------------|------------|-----------------|-----------------------|--------------------------|-------------------|-------------------------|
| I-SMAD binding     | 143        | 1.0660e-5         | 3.0796e-4       | 2.3563                | 33                         | 0.16%                     | 80         | 6.4624e-3       | 2.2628                | 11                       | 11                | 0.12%                   |
| neuropilin binding | 186        | 8.5861e-5         | 1.9069e-3       | 2.2009                | 30                         | 0.14%                     | 101        | 1.7408e-2       | 2.0888                | 12                       | 13                | 0.13%                   |

The test set of 20,886 genomic regions picked 9,455 (44%) of all 21,395 genes.  
 GO Molecular Function has 4,131 terms covering 17,189 (80%) of all 21,395 genes, and 227,341 term - gene associations.  
 4,131 ontology terms (100%) were tested using an annotation count range of [1, Inf].

Human Phenotype (20+ terms)

Global controls

Table controls:   Shown top rows in this table:   Term annotation count: Min:  Max:   Visualize this table:

| Term Name                               | Binom Rank | Binom Raw P-Value | Binom FDR Q-Val | Binom Fold Enrichment | Binom Observed Region Hits | Binom Region Set Coverage | Hyper Rank | Hyper FDR Q-Val | Hyper Fold Enrichment | Hyper Observed Gene Hits | Hyper Total Genes | Hyper Gene Set Coverage |
|-----------------------------------------|------------|-------------------|-----------------|-----------------------|----------------------------|---------------------------|------------|-----------------|-----------------------|--------------------------|-------------------|-------------------------|
| Abnormality of the nail                 | 12         | 3.1718e-34        | 1.7442e-31      | 2.0989                | 336                        | 1.61%                     | 105        | 1.8855e-3       | 1.3277                | 115                      | 196               | 1.22%                   |
| Cleft lip                               | 18         | 4.8097e-31        | 1.7633e-28      | 2.3108                | 245                        | 1.17%                     | 134        | 3.6532e-3       | 1.4400                | 63                       | 99                | 0.67%                   |
| Aplasia/Hypoplasia of the eyebrow       | 22         | 8.3668e-30        | 2.5097e-27      | 2.7557                | 169                        | 0.81%                     | 219        | 1.7735e-2       | 1.4457                | 46                       | 72                | 0.49%                   |
| Abnormal number of teeth                | 25         | 4.5672e-29        | 1.2056e-26      | 2.1920                | 256                        | 1.23%                     | 141        | 4.3276e-3       | 1.4169                | 67                       | 107               | 0.71%                   |
| Cleft upper lip                         | 35         | 1.2807e-26        | 2.4146e-24      | 2.2276                | 225                        | 1.08%                     | 155        | 5.9888e-3       | 1.4356                | 59                       | 93                | 0.62%                   |
| Abnormality of the eyelashes            | 36         | 1.3291e-26        | 2.4364e-24      | 2.3380                | 203                        | 0.97%                     | 109        | 2.0755e-3       | 1.4563                | 65                       | 101               | 0.69%                   |
| Aplasia/Hypoplasia of the nails         | 39         | 2.9555e-26        | 5.0009e-24      | 2.5516                | 169                        | 0.81%                     | 165        | 7.1203e-3       | 1.4784                | 49                       | 75                | 0.52%                   |
| Reduced number of teeth                 | 49         | 7.1761e-24        | 9.6643e-22      | 2.1942                | 207                        | 0.99%                     | 226        | 1.9926e-2       | 1.3815                | 58                       | 95                | 0.61%                   |
| Sparse or absent eyelashes              | 51         | 2.4536e-23        | 3.1747e-21      | 2.8953                | 120                        | 0.57%                     | 211        | 1.5916e-2       | 1.5557                | 33                       | 48                | 0.35%                   |
| Anonychia                               | 58         | 1.5548e-21        | 1.7690e-19      | 3.7726                | 76                         | 0.36%                     | 171        | 8.5958e-3       | 1.9966                | 15                       | 17                | 0.16%                   |
| Finger syndactyly                       | 65         | 1.3284e-20        | 1.3486e-18      | 2.6445                | 122                        | 0.58%                     | 9          | 1.1746e-6       | 2.0365                | 36                       | 40                | 0.38%                   |
| Nail dysplasia                          | 81         | 3.7252e-18        | 3.0349e-16      | 2.1215                | 166                        | 0.79%                     | 302        | 4.0534e-2       | 1.3528                | 55                       | 92                | 0.58%                   |
| Abnormality of the plantar skin of foot | 95         | 6.0902e-17        | 4.2305e-15      | 2.5247                | 107                        | 0.51%                     | 93         | 1.6068e-3       | 1.6536                | 38                       | 52                | 0.40%                   |
| Plantar hyperkeratosis                  | 97         | 7.2613e-17        | 4.9399e-15      | 3.1214                | 75                         | 0.36%                     | 246        | 2.2752e-2       | 1.6457                | 24                       | 33                | 0.25%                   |
| Hypodontia                              | 100        | 1.0258e-16        | 6.7690e-15      | 2.2326                | 135                        | 0.65%                     | 312        | 4.5947e-2       | 1.4331                | 38                       | 60                | 0.40%                   |
| Abnormality of hair texture             | 133        | 3.8755e-14        | 1.9229e-12      | 2.0227                | 141                        | 0.68%                     | 139        | 4.2749e-3       | 1.4512                | 59                       | 92                | 0.62%                   |
| Abnormality of epidermal morphology     | 139        | 9.3992e-14        | 4.4622e-12      | 2.5868                | 81                         | 0.39%                     | 314        | 4.6472e-2       | 1.5482                | 26                       | 38                | 0.27%                   |
| Abnormal blistering of the skin         | 156        | 9.2997e-13        | 3.9339e-11      | 4.0533                | 39                         | 0.19%                     | 297        | 3.9322e-2       | 1.9396                | 12                       | 14                | 0.13%                   |
| Cutaneous syndactyly                    | 197        | 2.8941e-11        | 9.6944e-10      | 2.3409                | 78                         | 0.37%                     | 17         | 2.8645e-5       | 2.1012                | 26                       | 28                | 0.27%                   |
| Fragile nails                           | 198        | 3.1876e-11        | 1.0624e-9       | 3.3935                | 42                         | 0.20%                     | 142        | 4.4170e-3       | 2.1120                | 14                       | 15                | 0.15%                   |

The test set of 20,886 genomic regions picked 9,455 (44%) of all 21,395 genes.  
 Human Phenotype has 6,599 terms covering 3,215 (15%) of all 21,395 genes, and 244,972 term - gene associations.

6,599 ontology terms (100%) were tested using an annotation count range of [1, Inf].

**Mouse Phenotype Single KO (20+ terms)**

Global controls

Table controls:  Shown top rows in this table:   Term annotation count: Min:  Max:   Visualize this table:

| Term Name                                                        | Binom Rank | Binom Raw P-Value | Binom FDR Q-Val   | Binom Fold Enrichment | Binom Observed Region Hits | Binom Region Set Coverage | Hyper Rank | Hyper FDR Q-Val  | Hyper Fold Enrichment | Hyper Observed Gene Hits | Hyper Total Genes | Hyper Gene Set Coverage |
|------------------------------------------------------------------|------------|-------------------|-------------------|-----------------------|----------------------------|---------------------------|------------|------------------|-----------------------|--------------------------|-------------------|-------------------------|
| <a href="#">abnormal vibrissa morphology</a>                     | 112        | <b>9.2927e-24</b> | <b>7.6084e-22</b> | 2.2036                | 204                        | 0.98%                     | 256        | <b>6.1663e-7</b> | 1.6435                | 69                       | 95                | 0.73%                   |
| <a href="#">abnormal cardiac outflow tract development</a>       | 127        | <b>3.6388e-22</b> | <b>2.6274e-20</b> | 2.0047                | 237                        | 1.13%                     | 213        | <b>8.9432e-8</b> | 1.6191                | 83                       | 116               | 0.88%                   |
| <a href="#">abnormal sphenoid bone morphology</a>                | 139        | <b>2.2335e-21</b> | <b>1.4735e-19</b> | 2.1928                | 184                        | 0.88%                     | 168        | <b>6.5612e-9</b> | 1.8162                | 61                       | 76                | 0.65%                   |
| <a href="#">abnormal tongue morphology</a>                       | 142        | <b>5.2565e-21</b> | <b>3.3945e-19</b> | 2.1295                | 193                        | 0.92%                     | 419        | <b>3.5544e-5</b> | 1.5685                | 61                       | 88                | 0.65%                   |
| <a href="#">abnormal epidermis stratum spinosum morphology</a>   | 165        | <b>1.4210e-19</b> | <b>7.8972e-18</b> | 2.6110                | 118                        | 0.56%                     | 1,182      | <b>1.5900e-2</b> | 1.4435                | 37                       | 58                | 0.39%                   |
| <a href="#">abnormal hair shaft morphology</a>                   | 178        | <b>5.7720e-19</b> | <b>2.9735e-17</b> | 2.3610                | 138                        | 0.66%                     | 606        | <b>5.9133e-4</b> | 1.5666                | 45                       | 65                | 0.48%                   |
| <a href="#">abnormal epidermis stratum basale morphology</a>     | 198        | <b>2.5862e-17</b> | <b>1.1977e-15</b> | 2.8083                | 91                         | 0.44%                     | 1,292      | <b>2.2070e-2</b> | 1.5517                | 24                       | 35                | 0.25%                   |
| <a href="#">abnormal merocrine gland morphology</a>              | 200        | <b>3.0943e-17</b> | <b>1.4187e-15</b> | 2.0319                | 174                        | 0.83%                     | 281        | <b>1.1339e-6</b> | 1.7124                | 56                       | 74                | 0.59%                   |
| <a href="#">abnormal basicranium morphology</a>                  | 206        | <b>5.1547e-17</b> | <b>2.2946e-15</b> | 2.1129                | 156                        | 0.75%                     | 259        | <b>6.7392e-7</b> | 1.7456                | 54                       | 70                | 0.57%                   |
| <a href="#">abnormal frontal bone morphology</a>                 | 221        | <b>4.9979e-16</b> | <b>2.0738e-14</b> | 2.0344                | 160                        | 0.77%                     | 391        | <b>2.1212e-5</b> | 1.6881                | 47                       | 63                | 0.50%                   |
| <a href="#">abnormal epidermis stratum granulosum morphology</a> | 222        | <b>5.2441e-16</b> | <b>2.1662e-14</b> | 2.2625                | 125                        | 0.60%                     | 1,220      | <b>1.7223e-2</b> | 1.4234                | 39                       | 62                | 0.41%                   |
| <a href="#">abnormal tooth development</a>                       | 223        | <b>5.3293e-16</b> | <b>2.1915e-14</b> | 2.1110                | 146                        | 0.70%                     | 892        | <b>4.9023e-3</b> | 1.4743                | 43                       | 66                | 0.45%                   |
| <a href="#">eyelids open at birth</a>                            | 224        | <b>6.5007e-16</b> | <b>2.6612e-14</b> | 2.1117                | 145                        | 0.69%                     | 388        | <b>2.0636e-5</b> | 1.7505                | 41                       | 53                | 0.43%                   |
| <a href="#">abnormal midface morphology</a>                      | 232        | <b>2.8103e-15</b> | <b>1.1108e-13</b> | 3.9015                | 50                         | 0.24%                     | 1,360      | <b>2.6061e-2</b> | 2.0365                | 9                        | 10                | 0.10%                   |
| <a href="#">abnormal hair follicle orientation</a>               | 233        | <b>2.8687e-15</b> | <b>1.1290e-13</b> | 2.9275                | 74                         | 0.35%                     | 1,260      | <b>2.0580e-2</b> | 1.8385                | 13                       | 16                | 0.14%                   |
| <a href="#">abnormal keratinocyte morphology</a>                 | 234        | <b>2.9348e-15</b> | <b>1.1501e-13</b> | 2.3992                | 105                        | 0.50%                     | 752        | <b>2.0697e-3</b> | 1.6028                | 34                       | 48                | 0.36%                   |
| <a href="#">abnormal basisphenoid bone morphology</a>            | 246        | <b>1.7587e-14</b> | <b>6.5557e-13</b> | 2.3091                | 107                        | 0.51%                     | 254        | <b>5.5474e-7</b> | 1.9471                | 37                       | 43                | 0.39%                   |
| <a href="#">abnormal nasal septum morphology</a>                 | 265        | <b>7.4468e-14</b> | <b>2.5769e-12</b> | 2.4013                | 94                         | 0.45%                     | 297        | <b>1.7198e-6</b> | 2.0042                | 31                       | 35                | 0.33%                   |
| <a href="#">epidermis stratum spinosum hyperplasia</a>           | 266        | <b>8.9135e-14</b> | <b>3.0728e-12</b> | 2.5720                | 82                         | 0.39%                     | 1,400      | <b>2.7643e-2</b> | 1.4902                | 27                       | 41                | 0.29%                   |
| <a href="#">abnormal keratinocyte physiology</a>                 | 270        | <b>1.0351e-13</b> | <b>3.5156e-12</b> | 2.1236                | 121                        | 0.58%                     | 1,102      | <b>1.3031e-2</b> | 1.4367                | 40                       | 63                | 0.42%                   |

The test set of 20,886 genomic regions picked 9,455 (44%) of all 21,395 genes.  
 Mouse Phenotype Single KO has 9,170 terms covering 9,466 (44%) of all 21,395 genes, and 551,620 term - gene associations.  
 9,170 ontology terms (100%) were tested using an annotation count range of [1, Inf].

**Mouse Phenotype (20+ terms)**

Global controls

Table controls:  Shown top rows in this table:   Term annotation count: Min:  Max:   Visualize this table:

| Term Name                                      | Binom Rank | Binom Raw P-Value | Binom FDR Q-Val | Binom Fold Enrichment | Binom Observed Region Hits | Binom Region Set Coverage | Hyper Rank | Hyper FDR Q-Val | Hyper Fold Enrichment | Hyper Observed Gene Hits | Hyper Total Genes | Hyper Gene Set Coverage |
|------------------------------------------------|------------|-------------------|-----------------|-----------------------|----------------------------|---------------------------|------------|-----------------|-----------------------|--------------------------|-------------------|-------------------------|
| abnormal epidermis stratum basale morphology   | 106        | 7.3426e-35        | 6.6326e-33      | 3.0588                | 169                        | 0.81%                     | 977        | 1.3292e-3       | 1.5463                | 41                       | 60                | 0.43%                   |
| curly tail                                     | 160        | 5.2672e-28        | 3.1521e-26      | 2.6337                | 171                        | 0.82%                     | 906        | 8.3646e-4       | 1.5307                | 46                       | 68                | 0.49%                   |
| abnormal epidermis stratum corneum morphology  | 171        | 6.2889e-27        | 3.5214e-25      | 2.0355                | 281                        | 1.35%                     | 690        | 1.2073e-4       | 1.3734                | 105                      | 173               | 1.11%                   |
| abnormal ectoderm morphology                   | 179        | 2.7606e-26        | 1.4767e-24      | 2.7650                | 147                        | 0.70%                     | 542        | 1.6859e-5       | 1.8103                | 36                       | 45                | 0.38%                   |
| blistering                                     | 197        | 4.3473e-25        | 2.1130e-23      | 3.3876                | 103                        | 0.49%                     | 866        | 5.8924e-4       | 1.7828                | 26                       | 33                | 0.27%                   |
| abnormal vibrissa morphology                   | 199        | 4.8834e-25        | 2.3497e-23      | 2.0483                | 256                        | 1.23%                     | 314        | 4.6668e-8       | 1.6163                | 85                       | 119               | 0.90%                   |
| abnormal apical ectodermal ridge morphology    | 211        | 3.1159e-24        | 1.4139e-22      | 2.8122                | 131                        | 0.63%                     | 565        | 2.3039e-5       | 1.8567                | 32                       | 39                | 0.34%                   |
| abnormal tongue morphology                     | 214        | 6.5298e-24        | 2.9216e-22      | 2.0208                | 252                        | 1.21%                     | 439        | 1.6496e-6       | 1.5463                | 82                       | 120               | 0.87%                   |
| thick epidermis                                | 230        | 1.2159e-22        | 5.0617e-21      | 2.0547                | 228                        | 1.09%                     | 677        | 1.0459e-4       | 1.4574                | 76                       | 118               | 0.80%                   |
| abnormal epidermis stratum spinosum morphology | 231        | 1.2962e-22        | 5.3728e-21      | 2.4288                | 158                        | 0.76%                     | 968        | 1.2697e-3       | 1.4795                | 51                       | 78                | 0.54%                   |
| abnormal sphenoid bone morphology              | 246        | 1.8676e-21        | 7.2692e-20      | 2.0361                | 220                        | 1.05%                     | 260        | 5.6636e-9       | 1.7143                | 75                       | 99                | 0.79%                   |
| decreased intestinal adenoma incidence         | 253        | 5.8296e-21        | 2.2063e-19      | 5.6889                | 48                         | 0.23%                     | 1,697      | 1.8551e-2       | 2.2628                | 7                        | 7                 | 0.07%                   |
| abnormal basicranium morphology                | 255        | 6.6410e-21        | 2.4936e-19      | 2.0885                | 201                        | 0.96%                     | 366        | 2.1703e-7       | 1.6610                | 69                       | 94                | 0.73%                   |
| impaired skin barrier function                 | 264        | 1.6921e-20        | 6.1370e-19      | 2.2203                | 171                        | 0.82%                     | 920        | 9.3715e-4       | 1.4512                | 59                       | 92                | 0.62%                   |
| abnormal keratinocyte morphology               | 267        | 1.8422e-20        | 6.6065e-19      | 2.2009                | 174                        | 0.83%                     | 632        | 6.9824e-5       | 1.5428                | 60                       | 88                | 0.63%                   |
| abnormal dendritic cell number                 | 271        | 2.1323e-20        | 7.5338e-19      | 2.0572                | 203                        | 0.97%                     | 657        | 8.3913e-5       | 1.4534                | 79                       | 123               | 0.84%                   |
| abnormal hair shaft morphology                 | 277        | 3.2789e-20        | 1.1334e-18      | 2.1877                | 174                        | 0.83%                     | 755        | 2.4211e-4       | 1.5085                | 58                       | 87                | 0.61%                   |
| decreased organ/body region tumor incidence    | 280        | 3.7680e-20        | 1.2885e-18      | 2.5194                | 130                        | 0.62%                     | 1,203      | 4.0506e-3       | 1.5557                | 33                       | 48                | 0.35%                   |
| abnormal substantia nigra morphology           | 283        | 6.1182e-20        | 2.0700e-18      | 3.2254                | 86                         | 0.41%                     | 1,492      | 1.0271e-2       | 1.6762                | 20                       | 27                | 0.21%                   |
| oligodactyly                                   | 285        | 8.3295e-20        | 2.7984e-18      | 2.1503                | 177                        | 0.85%                     | 382        | 2.7015e-7       | 1.7529                | 55                       | 71                | 0.58%                   |

The test set of 20,886 genomic regions picked 9,455 (44%) of all 21,395 genes.

Mouse Phenotype has 9,575 terms covering 9,654 (45%) of all 21,395 genes, and 705,265 term - gene associations. 9,575 ontology terms (100%) were tested using an annotation count range of [1, Inf].
