# Supplementary material for: AP-2α and AP-2β cooperatively function in the craniofacial surface ectoderm to regulate chromatin and gene expression dynamics during facial development
Source: eLife journal article supplement (doi:10.7554/elife.70511), 2022-03-25
Supplement: supp [file elife-70511-supp-v1.zip]

Job Description

Region-Gene Association Graphs

What do these graphs illustrate?

Number of associated genes per region

Download as PDF.

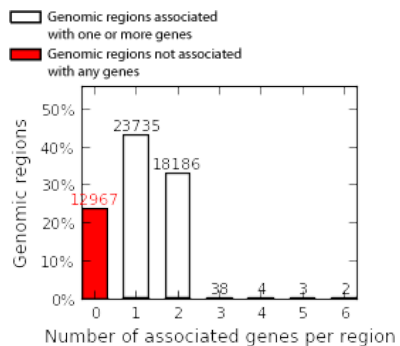

Binned by orientation and distance to TSS

Download as PDF.

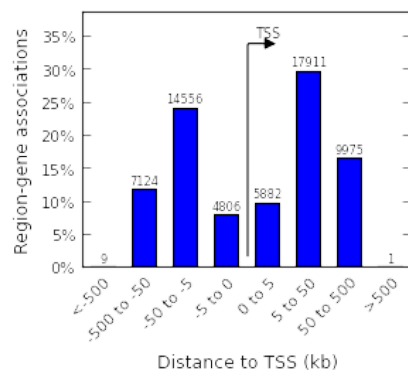

Binned by absolute distance to TSS

Download as PDF.

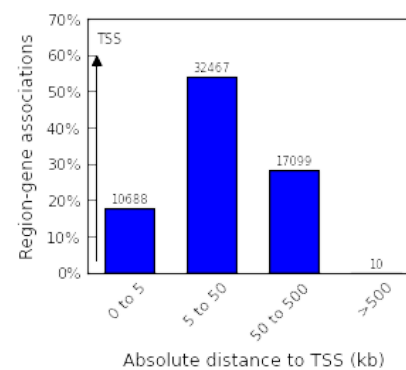

Global Controls

Global Export

Which data is exported by each option?

Ensembl Genes (no terms)

Global controls

GO Biological Process (20+ terms)

Global controls

Table controls:

Shown top rows in this table:

Term annotation count: Min:  Max:

Visualize this table:

| Term Name                                                                            | Binom Rank | Binom Raw P-Value | Binom FDR Q-Val | Binom Fold Enrichment | Binom Observed Region Hits | Binom Region Set Coverage | Hyper Rank | Hyper FDR Q-Val | Hyper Fold Enrichment | Hyper Observed Gene Hits | Hyper Total Genes | Hyper Gene Set Coverage |
|--------------------------------------------------------------------------------------|------------|-------------------|-----------------|-----------------------|----------------------------|---------------------------|------------|-----------------|-----------------------|--------------------------|-------------------|-------------------------|
| <a href="#">animal organ morphogenesis</a>                                           | 1          | 0.0000            | 0.0000          | 2.0393                | 5,190                      | 9.45%                     | 43         | 2.1062e-47      | 1.2648                | 874                      | 962               | 5.69%                   |
| <a href="#">anatomical structure formation involved in morphogenesis</a>             | 1          | 0.0000            | 0.0000          | 2.0189                | 4,594                      | 8.36%                     | 51         | 5.7786e-44      | 1.2662                | 804                      | 884               | 5.23%                   |
| <a href="#">epithelium development</a>                                               | 1          | 0.0000            | 0.0000          | 2.0296                | 5,328                      | 9.70%                     | 72         | 4.5403e-39      | 1.2344                | 923                      | 1,041             | 6.01%                   |
| <a href="#">embryo development</a>                                                   | 1          | 0.0000            | 0.0000          | 2.0091                | 5,309                      | 9.66%                     | 94         | 3.9094e-34      | 1.2167                | 943                      | 1,079             | 6.14%                   |
| <a href="#">tissue morphogenesis</a>                                                 | 1          | 0.0000            | 0.0000          | 2.1463                | 3,472                      | 6.32%                     | 96         | 8.9745e-34      | 1.2800                | 559                      | 608               | 3.64%                   |
| <a href="#">embryonic morphogenesis</a>                                              | 1          | 0.0000            | 0.0000          | 2.1460                | 3,479                      | 6.33%                     | 98         | 2.8486e-33      | 1.2745                | 574                      | 627               | 3.74%                   |
| <a href="#">tube development</a>                                                     | 1          | 0.0000            | 0.0000          | 2.1484                | 3,840                      | 6.99%                     | 111        | 2.1421e-31      | 1.2625                | 594                      | 655               | 3.87%                   |
| <a href="#">pattern specification process</a>                                        | 1          | 0.0000            | 0.0000          | 2.3480                | 2,622                      | 4.77%                     | 187        | 1.4361e-21      | 1.2656                | 400                      | 440               | 2.60%                   |
| <a href="#">negative regulation of transcription from RNA polymerase II promoter</a> | 1          | 0.0000            | 0.0000          | 2.0807                | 4,129                      | 7.52%                     | 242        | 1.7075e-17      | 1.1790                | 708                      | 836               | 4.61%                   |

| Term Name                                                          | Binom Rank | Binom Raw P-Value  | Binom FDR Q-Val    | Binom Fold Enrichment | Binom Observed Region Hits | Binom Region Set Coverage | Hyper Rank | Hyper FDR Q-Val   | Hyper Fold Enrichment | Hyper Observed Gene Hits | Hyper Total Genes | Hyper Gene Set Coverage |
|--------------------------------------------------------------------|------------|--------------------|--------------------|-----------------------|----------------------------|---------------------------|------------|-------------------|-----------------------|--------------------------|-------------------|-------------------------|
| <a href="#">embryo development ending in birth or egg hatching</a> | 166        | <b>6.9169e-323</b> | <b>5.4545e-321</b> | 2.0366                | 3,497                      | 6.37%                     | 274        | <b>8.9678e-16</b> | 1.1826                | 615                      | 724               | 4.00%                   |
| <a href="#">chordate embryonic development</a>                     | 167        | <b>1.2712e-320</b> | <b>9.9643e-319</b> | 2.0376                | 3,469                      | 6.31%                     | 271        | <b>7.1148e-16</b> | 1.1841                | 609                      | 716               | 3.96%                   |
| <a href="#">morphogenesis of an epithelium</a>                     | 173        | <b>3.8931e-309</b> | <b>2.9457e-307</b> | 2.1689                | 2,902                      | 5.28%                     | 136        | <b>4.8958e-27</b> | 1.2776                | 457                      | 498               | 2.97%                   |
| <a href="#">regionalization</a>                                    | 177        | <b>5.2691e-293</b> | <b>3.8968e-291</b> | 2.4473                | 2,153                      | 3.92%                     | 206        | <b>3.7245e-20</b> | 1.2870                | 318                      | 344               | 2.07%                   |
| <a href="#">transcription from RNA polymerase II promoter</a>      | 178        | <b>2.0853e-292</b> | <b>1.5335e-290</b> | 2.1043                | 2,942                      | 5.36%                     | 171        | <b>1.2477e-23</b> | 1.2450                | 516                      | 577               | 3.36%                   |
| <a href="#">embryonic organ development</a>                        | 179        | <b>6.4136e-292</b> | <b>4.6902e-290</b> | 2.1729                | 2,733                      | 4.97%                     | 167        | <b>2.8454e-24</b> | 1.2669                | 445                      | 489               | 2.90%                   |
| <a href="#">tube morphogenesis</a>                                 | 184        | <b>2.5089e-288</b> | <b>1.7849e-286</b> | 2.2562                | 2,491                      | 4.53%                     | 176        | <b>4.6166e-23</b> | 1.2864                | 365                      | 395               | 2.38%                   |
| <a href="#">skeletal system development</a>                        | 191        | <b>5.2037e-266</b> | <b>3.5663e-264</b> | 2.1594                | 2,530                      | 4.61%                     | 165        | <b>1.7510e-24</b> | 1.2747                | 423                      | 462               | 2.75%                   |
| <a href="#">cell morphogenesis involved in differentiation</a>     | 196        | <b>3.9151e-260</b> | <b>2.6147e-258</b> | 2.0324                | 2,849                      | 5.19%                     | 95         | <b>4.6168e-34</b> | 1.3073                | 462                      | 492               | 3.01%                   |
| <a href="#">gland development</a>                                  | 204        | <b>2.3350e-251</b> | <b>1.4983e-249</b> | 2.0904                | 2,577                      | 4.69%                     | 211        | <b>7.3255e-20</b> | 1.2506                | 415                      | 462               | 2.70%                   |
| <a href="#">epithelial cell differentiation</a>                    | 206        | <b>4.3925e-248</b> | <b>2.7912e-246</b> | 2.0361                | 2,708                      | 4.93%                     | 223        | <b>1.6409e-18</b> | 1.2255                | 478                      | 543               | 3.11%                   |

The test set of 54,935 genomic regions picked 15,368 (72%) of all 21,395 genes.  
 GO Biological Process has 13,090 terms covering 17,925 (84%) of all 21,395 genes, and 1,163,819 term - gene associations.  
 13,090 ontology terms (100%) were tested using an annotation count range of [1, Inf].

GO Cellular Component (19 terms)

Global controls

Table controls:  Shown top rows in this table:   Term annotation count: Min:  Max:   Visualize this table:

| Term Name                                         | Binom Rank | Binom Raw P-Value | Binom FDR Q-Val   | Binom Fold Enrichment | Binom Observed Region Hits | Binom Region Set Coverage | Hyper Rank | Hyper FDR Q-Val  | Hyper Fold Enrichment | Hyper Observed Gene Hits | Hyper Total Genes | Hyper Gene Set Coverage |
|---------------------------------------------------|------------|-------------------|-------------------|-----------------------|----------------------------|---------------------------|------------|------------------|-----------------------|--------------------------|-------------------|-------------------------|
| <a href="#">cell-cell adherens junction</a>       | 95         | <b>1.3105e-74</b> | <b>2.3367e-73</b> | 2.3108                | 612                        | 1.11%                     | 121        | <b>2.6806e-6</b> | 1.2927                | 91                       | 98                | 0.59%                   |
| <a href="#">ruffle membrane</a>                   | 120        | <b>2.5686e-50</b> | <b>3.6260e-49</b> | 2.2378                | 437                        | 0.80%                     | 172        | <b>1.4474e-3</b> | 1.2394                | 73                       | 82                | 0.48%                   |
| <a href="#">stress fiber</a>                      | 124        | <b>6.0020e-49</b> | <b>8.1995e-48</b> | 2.4040                | 366                        | 0.67%                     | 176        | <b>1.7118e-3</b> | 1.2637                | 59                       | 65                | 0.38%                   |
| <a href="#">actin filament bundle</a>             | 126        | <b>7.2958e-49</b> | <b>9.8088e-48</b> | 2.3022                | 399                        | 0.73%                     | 159        | <b>2.6547e-4</b> | 1.2778                | 67                       | 73                | 0.44%                   |
| <a href="#">actomyosin</a>                        | 138        | <b>1.2346e-45</b> | <b>1.5156e-44</b> | 2.2171                | 403                        | 0.73%                     | 152        | <b>1.3036e-4</b> | 1.2823                | 70                       | 76                | 0.46%                   |
| <a href="#">transcriptional repressor complex</a> | 152        | <b>1.2464e-41</b> | <b>1.3891e-40</b> | 2.0476                | 441                        | 0.80%                     | 218        | <b>2.1950e-2</b> | 1.1842                | 74                       | 87                | 0.48%                   |
| <a href="#">cortical cytoskeleton</a>             | 157        | <b>2.0625e-39</b> | <b>2.2254e-38</b> | 2.0142                | 434                        | 0.79%                     | 162        | <b>5.3778e-4</b> | 1.2409                | 82                       | 92                | 0.53%                   |
| <a href="#">cortical actin cytoskeleton</a>       | 176        | <b>9.2662e-34</b> | <b>8.9187e-33</b> | 2.1411                | 318                        | 0.58%                     | 199        | <b>6.6614e-3</b> | 1.2399                | 57                       | 64                | 0.37%                   |
| <a href="#">MHC protein complex</a>               | 192        | <b>1.8324e-26</b> | <b>1.6167e-25</b> | 4.2324                | 83                         | 0.15%                     | 220        | <b>2.8428e-2</b> | 1.3342                | 23                       | 24                | 0.15%                   |
| <a href="#">PcG protein complex</a>               | 210        | <b>2.9334e-23</b> | <b>2.3663e-22</b> | 2.1438                | 213                        | 0.39%                     | 203        | <b>1.0055e-2</b> | 1.2711                | 42                       | 46                | 0.27%                   |
| <a href="#">dendritic shaft</a>                   | 219        | <b>5.8754e-22</b> | <b>4.5447e-21</b> | 2.1174                | 206                        | 0.37%                     | 166        | <b>7.5573e-4</b> | 1.3546                | 36                       | 37                | 0.23%                   |
| <a href="#">excitatory synapse</a>                | 238        | <b>1.0714e-17</b> | <b>7.6257e-17</b> | 2.1930                | 150                        | 0.27%                     | 217        | <b>2.1474e-2</b> | 1.3365                | 24                       | 25                | 0.16%                   |

| Term Name                               | Binom Rank | Binom Raw P-Value | Binom FDR Q-Val   | Binom Fold Enrichment | Binom Observed Region Hits | Binom Region Set Coverage | Hyper Rank | Hyper FDR Q-Val  | Hyper Fold Enrichment | Hyper Observed Gene Hits | Hyper Total Genes | Hyper Gene Set Coverage |
|-----------------------------------------|------------|-------------------|-------------------|-----------------------|----------------------------|---------------------------|------------|------------------|-----------------------|--------------------------|-------------------|-------------------------|
| <a href="#">desmosome</a>               | 239        | <b>1.5025e-17</b> | <b>1.0649e-16</b> | 2.2459                | 141                        | 0.26%                     | 201        | <b>9.5157e-3</b> | 1.3425                | 27                       | 28                | 0.18%                   |
| <a href="#">compact myelin</a>          | 266        | <b>1.3256e-14</b> | <b>8.4419e-14</b> | 2.4128                | 99                         | 0.18%                     | 224        | <b>3.7896e-2</b> | 1.3922                | 16                       | 16                | 0.10%                   |
| <a href="#">costamere</a>               | 267        | <b>1.4936e-14</b> | <b>9.4761e-14</b> | 2.1505                | 126                        | 0.23%                     | 205        | <b>1.1009e-2</b> | 1.3922                | 20                       | 20                | 0.13%                   |
| <a href="#">lamellipodium membrane</a>  | 274        | <b>5.2168e-14</b> | <b>3.2253e-13</b> | 2.1481                | 121                        | 0.22%                     | 222        | <b>3.7757e-2</b> | 1.3316                | 22                       | 23                | 0.14%                   |
| <a href="#">paranode region of axon</a> | 279        | <b>8.4665e-14</b> | <b>5.1406e-13</b> | 2.3370                | 99                         | 0.18%                     | 224        | <b>3.7896e-2</b> | 1.3922                | 16                       | 16                | 0.10%                   |
| <a href="#">myosin II complex</a>       | 313        | <b>1.0454e-10</b> | <b>5.6577e-10</b> | 2.0349                | 101                        | 0.18%                     | 236        | <b>4.7527e-2</b> | 1.3289                | 21                       | 22                | 0.14%                   |
| <a href="#">Golgi medial cisterna</a>   | 343        | <b>2.2340e-9</b>  | <b>1.1033e-8</b>  | 2.5061                | 55                         | 0.10%                     | 224        | <b>3.7896e-2</b> | 1.3922                | 16                       | 16                | 0.10%                   |

The test set of 54,935 genomic regions picked 15,368 (72%) of all 21,395 genes.  
 GO Cellular Component has 1,694 terms covering 19,074 (89%) of all 21,395 genes, and 371,380 term - gene associations.  
 1,694 ontology terms (100%) were tested using an annotation count range of [1, Inf].

GO Molecular Function (20+ terms)

Global controls

Table controls:  Shown top rows in this table:   Term annotation count: Min:  Max:   Visualize this table:

| Term Name                                                                                                                       | Binom Rank | Binom Raw P-Value  | Binom FDR Q-Val    | Binom Fold Enrichment | Binom Observed Region Hits | Binom Region Set Coverage | Hyper Rank | Hyper FDR Q-Val   | Hyper Fold Enrichment | Hyper Observed Gene Hits | Hyper Total Genes | Hyper Gene Set Coverage |
|---------------------------------------------------------------------------------------------------------------------------------|------------|--------------------|--------------------|-----------------------|----------------------------|---------------------------|------------|-------------------|-----------------------|--------------------------|-------------------|-------------------------|
| <a href="#">transcription regulatory region sequence-specific DNA binding</a>                                                   | 1          | <b>0.0000</b>      | <b>0.0000</b>      | 2.1823                | 3,941                      | 7.17%                     | 4          | <b>9.3706e-35</b> | 1.2625                | 672                      | 741               | 4.37%                   |
| <a href="#">RNA polymerase II transcription factor activity, sequence-specific DNA binding</a>                                  | 1          | <b>0.0000</b>      | <b>0.0000</b>      | 2.1573                | 4,143                      | 7.54%                     | 5          | <b>1.5525e-34</b> | 1.2577                | 692                      | 766               | 4.50%                   |
| <a href="#">regulatory region DNA binding</a>                                                                                   | 1          | <b>0.0000</b>      | <b>0.0000</b>      | 2.1434                | 4,611                      | 8.39%                     | 6          | <b>2.1077e-34</b> | 1.2396                | 796                      | 894               | 5.18%                   |
| <a href="#">transcription regulatory region DNA binding</a>                                                                     | 1          | <b>0.0000</b>      | <b>0.0000</b>      | 2.1427                | 4,604                      | 8.38%                     | 7          | <b>2.8375e-34</b> | 1.2392                | 794                      | 892               | 5.17%                   |
| <a href="#">sequence-specific DNA binding</a>                                                                                   | 1          | <b>0.0000</b>      | <b>0.0000</b>      | 2.1553                | 5,398                      | 9.83%                     | 8          | <b>5.0528e-33</b> | 1.2162                | 933                      | 1,068             | 6.07%                   |
| <a href="#">RNA polymerase II regulatory region sequence-specific DNA binding</a>                                               | 1          | <b>0.0000</b>      | <b>0.0000</b>      | 2.2198                | 3,572                      | 6.50%                     | 9          | <b>9.8904e-33</b> | 1.2691                | 598                      | 656               | 3.89%                   |
| <a href="#">RNA polymerase II regulatory region DNA binding</a>                                                                 | 1          | <b>0.0000</b>      | <b>0.0000</b>      | 2.2113                | 3,579                      | 6.51%                     | 10         | <b>1.7536e-32</b> | 1.2675                | 600                      | 659               | 3.90%                   |
| <a href="#">sequence-specific double-stranded DNA binding</a>                                                                   | 1          | <b>0.0000</b>      | <b>0.0000</b>      | 2.1497                | 4,025                      | 7.33%                     | 11         | <b>8.2288e-31</b> | 1.2431                | 692                      | 775               | 4.50%                   |
| <a href="#">double-stranded DNA binding</a>                                                                                     | 1          | <b>0.0000</b>      | <b>0.0000</b>      | 2.0995                | 4,183                      | 7.61%                     | 13         | <b>1.5865e-27</b> | 1.2216                | 745                      | 849               | 4.85%                   |
| <a href="#">transcription factor activity, RNA polymerase II core promoter proximal region sequence-specific binding</a>        | 24         | <b>7.0261e-282</b> | <b>1.2094e-279</b> | 2.2472                | 2,457                      | 4.47%                     | 18         | <b>8.9338e-24</b> | 1.2838                | 391                      | 424               | 2.54%                   |
| <a href="#">transcriptional activator activity, RNA polymerase II transcription regulatory region sequence-specific binding</a> | 25         | <b>1.4297e-281</b> | <b>2.3625e-279</b> | 2.2513                | 2,445                      | 4.45%                     | 12         | <b>1.4588e-29</b> | 1.3122                | 394                      | 418               | 2.56%                   |

| Term Name                                                                                                                       | Binom Rank | Binom Raw P-Value  | Binom FDR Q-Val    | Binom Fold Enrichment | Binom Observed Region Hits | Binom Region Set Coverage | Hyper Rank | Hyper FDR Q-Val   | Hyper Fold Enrichment | Hyper Observed Gene Hits | Hyper Total Genes | Hyper Gene Set Coverage |
|---------------------------------------------------------------------------------------------------------------------------------|------------|--------------------|--------------------|-----------------------|----------------------------|---------------------------|------------|-------------------|-----------------------|--------------------------|-------------------|-------------------------|
| <a href="#">core promoter proximal region DNA binding</a>                                                                       | 27         | <b>6.2579e-255</b> | <b>9.5746e-253</b> | 2.2242                | 2,275                      | 4.14%                     | 32         | <b>1.4474e-18</b> | 1.2591                | 369                      | 408               | 2.40%                   |
| <a href="#">core promoter proximal region sequence-specific DNA binding</a>                                                     | 30         | <b>7.9636e-251</b> | <b>1.0966e-248</b> | 2.2210                | 2,246                      | 4.09%                     | 33         | <b>2.8502e-18</b> | 1.2581                | 366                      | 405               | 2.38%                   |
| <a href="#">RNA polymerase II core promoter proximal region sequence-specific DNA binding</a>                                   | 31         | <b>9.8930e-248</b> | <b>1.3183e-245</b> | 2.2355                | 2,188                      | 3.98%                     | 35         | <b>4.0785e-18</b> | 1.2608                | 355                      | 392               | 2.31%                   |
| <a href="#">transcriptional activator activity, RNA polymerase II core promoter proximal region sequence-specific binding</a>   | 37         | <b>2.8795e-192</b> | <b>3.2149e-190</b> | 2.2491                | 1,681                      | 3.06%                     | 34         | <b>3.9241e-18</b> | 1.2994                | 266                      | 285               | 1.73%                   |
| <a href="#">transcriptional repressor activity, RNA polymerase II transcription regulatory region sequence-specific binding</a> | 61         | <b>1.9347e-122</b> | <b>1.3102e-120</b> | 2.1029                | 1,245                      | 2.27%                     | 72         | <b>9.3818e-10</b> | 1.2494                | 210                      | 234               | 1.37%                   |
| <a href="#">transcriptional repressor activity, RNA polymerase II core promoter proximal region sequence-specific binding</a>   | 71         | <b>7.0170e-96</b>  | <b>4.0827e-94</b>  | 2.2276                | 854                        | 1.55%                     | 107        | <b>4.8310e-6</b>  | 1.2447                | 135                      | 151               | 0.88%                   |
| <a href="#">enhancer binding</a>                                                                                                | 84         | <b>5.3362e-69</b>  | <b>2.6243e-67</b>  | 2.2427                | 602                        | 1.10%                     | 96         | <b>1.0661e-6</b>  | 1.2927                | 104                      | 112               | 0.68%                   |
| <a href="#">enhancer sequence-specific DNA binding</a>                                                                          | 94         | <b>7.6663e-59</b>  | <b>3.3691e-57</b>  | 2.2042                | 531                        | 0.97%                     | 104        | <b>3.4657e-6</b>  | 1.2957                | 94                       | 101               | 0.61%                   |
| <a href="#">transcription factor activity, RNA polymerase II distal enhancer sequence-specific binding</a>                      | 102        | <b>1.7629e-55</b>  | <b>7.1399e-54</b>  | 2.0675                | 580                        | 1.06%                     | 89         | <b>3.2191e-7</b>  | 1.3119                | 98                       | 104               | 0.64%                   |

The test set of 54,935 genomic regions picked 15,368 (72%) of all 21,395 genes.  
 GO Molecular Function has 4,131 terms covering 17,189 (80%) of all 21,395 genes, and 227,341 term - gene associations.  
 4,131 ontology terms (100%) were tested using an annotation count range of [1, Inf].

**Human Phenotype (20+ terms)**

Global controls

Table controls:  Shown top rows in this table:   Term annotation count: Min:  Max:   Visualize this table:

| Term Name                                                | Binom Rank | Binom Raw P-Value  | Binom FDR Q-Val    | Binom Fold Enrichment | Binom Observed Region Hits | Binom Region Set Coverage | Hyper Rank | Hyper FDR Q-Val  | Hyper Fold Enrichment | Hyper Observed Gene Hits | Hyper Total Genes | Hyper Gene Set Coverage |
|----------------------------------------------------------|------------|--------------------|--------------------|-----------------------|----------------------------|---------------------------|------------|------------------|-----------------------|--------------------------|-------------------|-------------------------|
| <a href="#">Abnormal vascular morphology</a>             | 55         | <b>5.3009e-123</b> | <b>6.3602e-121</b> | 2.0158                | 1,386                      | 2.52%                     | 46         | <b>5.6904e-6</b> | 1.1852                | 252                      | 296               | 1.64%                   |
| <a href="#">Oral cleft</a>                               | 60         | <b>2.4385e-118</b> | <b>2.6819e-116</b> | 2.0856                | 1,227                      | 2.23%                     | 160        | <b>2.4463e-3</b> | 1.1532                | 193                      | 233               | 1.26%                   |
| <a href="#">Abnormality of the nail</a>                  | 64         | <b>1.0185e-112</b> | <b>1.0502e-110</b> | 2.2776                | 959                        | 1.75%                     | 52         | <b>7.9629e-6</b> | 1.2217                | 172                      | 196               | 1.12%                   |
| <a href="#">Cleft palate</a>                             | 66         | <b>6.1184e-112</b> | <b>6.1175e-110</b> | 2.1098                | 1,129                      | 2.06%                     | 173        | <b>3.3837e-3</b> | 1.1548                | 180                      | 217               | 1.17%                   |
| <a href="#">Abnormality of the hard palate</a>           | 68         | <b>4.6439e-110</b> | <b>4.5067e-108</b> | 2.0681                | 1,164                      | 2.12%                     | 152        | <b>2.0881e-3</b> | 1.1591                | 184                      | 221               | 1.20%                   |
| <a href="#">Abnormality of the periorbital region</a>    | 69         | <b>1.1720e-109</b> | <b>1.1208e-107</b> | 2.0211                | 1,227                      | 2.23%                     | 93         | <b>2.6769e-4</b> | 1.1715                | 207                      | 246               | 1.35%                   |
| <a href="#">Abnormal morphology of the great vessels</a> | 72         | <b>1.1794e-108</b> | <b>1.0810e-106</b> | 2.1375                | 1,063                      | 1.94%                     | 59         | <b>1.3121e-5</b> | 1.2115                | 181                      | 208               | 1.18%                   |
| <a href="#">Cleft lip</a>                                | 91         | <b>1.4960e-93</b>  | <b>1.0848e-91</b>  | 2.4528                | 684                        | 1.25%                     | 350        | <b>3.2943e-2</b> | 1.1812                | 84                       | 99                | 0.55%                   |
| <a href="#">Abnormality of upper limb joint</a>          | 92         | <b>1.7149e-93</b>  | <b>1.2301e-91</b>  | 2.0359                | 1,026                      | 1.87%                     | 138        | <b>1.8211e-3</b> | 1.1623                | 182                      | 218               | 1.18%                   |

| Term Name                                        | Binom Rank | Binom Raw P-Value | Binom FDR Q-Val | Binom Fold Enrichment | Binom Observed Region Hits | Binom Region Set Coverage | Hyper Rank | Hyper FDR Q-Val | Hyper Fold Enrichment | Hyper Observed Gene Hits | Hyper Total Genes | Hyper Gene Set Coverage |
|--------------------------------------------------|------------|-------------------|-----------------|-----------------------|----------------------------|---------------------------|------------|-----------------|-----------------------|--------------------------|-------------------|-------------------------|
| Cleft upper lip                                  | 102        | 8.0710e-86        | 5.2216e-84      | 2.4203                | 643                        | 1.17%                     | 301        | 2.0478e-2       | 1.1976                | 80                       | 93                | 0.52%                   |
| Aplasia/Hypoplasia of the nails                  | 105        | 1.3364e-85        | 8.3990e-84      | 2.8127                | 490                        | 0.89%                     | 115        | 8.6456e-4       | 1.2808                | 69                       | 75                | 0.45%                   |
| Abnormality of the stomach                       | 112        | 1.5387e-81        | 9.0659e-80      | 2.1774                | 762                        | 1.39%                     | 119        | 9.2706e-4       | 1.2040                | 128                      | 148               | 0.83%                   |
| Limb joint contracture                           | 117        | 1.1233e-78        | 6.3359e-77      | 2.2069                | 713                        | 1.30%                     | 202        | 6.0732e-3       | 1.1773                | 126                      | 149               | 0.82%                   |
| Abnormal systemic arterial morphology            | 150        | 5.2098e-69        | 2.2920e-67      | 2.0578                | 734                        | 1.34%                     | 190        | 5.1071e-3       | 1.1766                | 131                      | 155               | 0.85%                   |
| Congenital malformation of the great arteries    | 154        | 3.2310e-68        | 1.3845e-66      | 2.0570                | 726                        | 1.32%                     | 136        | 1.7357e-3       | 1.1988                | 124                      | 144               | 0.81%                   |
| Clinodactyly                                     | 166        | 6.0109e-67        | 2.3895e-65      | 2.0147                | 750                        | 1.37%                     | 262        | 1.3949e-2       | 1.1649                | 123                      | 147               | 0.80%                   |
| Aplasia/Hypoplasia involving bones of the thorax | 175        | 1.1970e-65        | 4.5136e-64      | 2.2824                | 551                        | 1.00%                     | 271        | 1.5531e-2       | 1.2017                | 82                       | 95                | 0.53%                   |
| Patent ductus arteriosus                         | 180        | 1.1966e-64        | 4.3867e-63      | 2.1777                | 601                        | 1.09%                     | 117        | 8.6948e-4       | 1.2375                | 96                       | 108               | 0.62%                   |
| Regional abnormality of skin                     | 186        | 7.9654e-62        | 2.8260e-60      | 2.0082                | 697                        | 1.27%                     | 316        | 2.3408e-2       | 1.1554                | 122                      | 147               | 0.79%                   |
| Flexion contracture of digit                     | 192        | 2.1325e-60        | 7.3294e-59      | 2.2161                | 539                        | 0.98%                     | 254        | 1.3234e-2       | 1.1992                | 87                       | 101               | 0.57%                   |

The test set of 54,935 genomic regions picked 15,368 (72%) of all 21,395 genes.  
 Human Phenotype has 6,599 terms covering 3,215 (15%) of all 21,395 genes, and 244,972 term - gene associations.  
 6,599 ontology terms (100%) were tested using an annotation count range of [1, Inf].

☐ Mouse Phenotype Single KO (20+ terms)

Global controls

Table controls:  Shown top rows in this table:   Term annotation count: Min:  Max:   Visualize this table:

| Term Name                                | Binom Rank | Binom Raw P-Value | Binom FDR Q-Val | Binom Fold Enrichment | Binom Observed Region Hits | Binom Region Set Coverage | Hyper Rank | Hyper FDR Q-Val | Hyper Fold Enrichment | Hyper Observed Gene Hits | Hyper Total Genes | Hyper Gene Set Coverage |
|------------------------------------------|------------|-------------------|-----------------|-----------------------|----------------------------|---------------------------|------------|-----------------|-----------------------|--------------------------|-------------------|-------------------------|
| neonatal lethality, complete penetrance  | 83         | 3.9095e-229       | 4.3193e-227     | 2                     | 2,618                      | 4.77%                     | 172        | 5.3002e-15      | 1.2174                | 418                      | 478               | 2.72%                   |
| abnormal craniofacial development        | 105        | 2.1899e-202       | 1.9125e-200     | 2.1813                | 1,890                      | 3.44%                     | 198        | 1.7458e-13      | 1.2525                | 278                      | 309               | 1.81%                   |
| abnormal cartilage morphology            | 132        | 1.1321e-171       | 7.8643e-170     | 2.1299                | 1,694                      | 3.08%                     | 133        | 3.7952e-18      | 1.2987                | 264                      | 283               | 1.72%                   |
| abnormal neurocranium morphology         | 151        | 1.2367e-163       | 7.5106e-162     | 2.2707                | 1,403                      | 2.55%                     | 337        | 2.4650e-9       | 1.2473                | 198                      | 221               | 1.29%                   |
| perinatal lethality, complete penetrance | 157        | 1.0899e-158       | 6.3659e-157     | 2.2563                | 1,379                      | 2.51%                     | 377        | 1.5142e-8       | 1.2361                | 198                      | 223               | 1.29%                   |
| abnormal eye development                 | 158        | 1.2594e-158       | 7.3092e-157     | 2.2139                | 1,436                      | 2.61%                     | 359        | 6.3708e-9       | 1.2318                | 215                      | 243               | 1.40%                   |
| abnormal eyelid morphology               | 175        | 1.5027e-144       | 7.8740e-143     | 2.3014                | 1,205                      | 2.19%                     | 341        | 2.8320e-9       | 1.2656                | 170                      | 187               | 1.11%                   |
| abnormal autopod morphology              | 187        | 1.6359e-136       | 8.0219e-135     | 2.0005                | 1,568                      | 2.85%                     | 321        | 1.4531e-9       | 1.2153                | 268                      | 307               | 1.74%                   |
| abnormal joint morphology                | 189        | 6.6141e-136       | 3.2091e-134     | 2.0706                | 1,434                      | 2.61%                     | 226        | 1.8871e-12      | 1.2560                | 249                      | 276               | 1.62%                   |
| abnormal lens morphology                 | 216        | 7.1003e-115       | 3.0143e-113     | 2.0037                | 1,314                      | 2.39%                     | 309        | 9.6103e-10      | 1.2334                | 233                      | 263               | 1.52%                   |
| abnormal eye size                        | 219        | 3.0325e-114       | 1.2698e-112     | 2.2321                | 1,015                      | 1.85%                     | 718        | 5.9884e-5       | 1.1977                | 154                      | 179               | 1.00%                   |
| abnormal pectoral girdle bone morphology | 225        | 9.5613e-112       | 3.8968e-110     | 2.1043                | 1,134                      | 2.06%                     | 303        | 8.2954e-10      | 1.2625                | 185                      | 204               | 1.20%                   |

| Term Name                                                                                | Binom Rank | Binom Raw P-Value  | Binom FDR Q-Val    | Binom Fold Enrichment | Binom Observed Region Hits | Binom Region Set Coverage | Hyper Rank | Hyper FDR Q-Val  | Hyper Fold Enrichment | Hyper Observed Gene Hits | Hyper Total Genes | Hyper Gene Set Coverage |
|------------------------------------------------------------------------------------------|------------|--------------------|--------------------|-----------------------|----------------------------|---------------------------|------------|------------------|-----------------------|--------------------------|-------------------|-------------------------|
| <a href="#">embryonic lethality during organogenesis, incomplete penetrance</a>          | 226        | <b>1.5266e-111</b> | <b>6.1943e-110</b> | 2.0149                | 1,258                      | 2.29%                     | 650        | <b>1.9651e-5</b> | 1.1816                | 202                      | 238               | 1.31%                   |
| <a href="#">microphthalmia</a>                                                           | 234        | <b>8.3082e-108</b> | <b>3.2558e-106</b> | 2.2303                | 959                        | 1.75%                     | 702        | <b>4.4846e-5</b> | 1.2077                | 144                      | 166               | 0.94%                   |
| <a href="#">exencephaly</a>                                                              | 241        | <b>1.7946e-103</b> | <b>6.8283e-102</b> | 2.1256                | 1,025                      | 1.87%                     | 928        | <b>5.4674e-4</b> | 1.1686                | 162                      | 193               | 1.05%                   |
| <a href="#">abnormal tooth morphology</a>                                                | 242        | <b>1.2199e-102</b> | <b>4.6225e-101</b> | 2.1111                | 1,033                      | 1.88%                     | 432        | <b>2.9205e-7</b> | 1.2427                | 158                      | 177               | 1.03%                   |
| <a href="#">abnormal cornea morphology</a>                                               | 247        | <b>7.2808e-101</b> | <b>2.7030e-99</b>  | 2.2119                | 913                        | 1.66%                     | 438        | <b>3.7754e-7</b> | 1.2487                | 148                      | 165               | 0.96%                   |
| <a href="#">abnormal epidermal layer morphology</a>                                      | 248        | <b>9.2816e-101</b> | <b>3.4320e-99</b>  | 2.0386                | 1,103                      | 2.01%                     | 386        | <b>2.0311e-8</b> | 1.2302                | 205                      | 232               | 1.33%                   |
| <a href="#">lethality throughout fetal growth and development, incomplete penetrance</a> | 253        | <b>7.7269e-100</b> | <b>2.8006e-98</b>  | 2.1080                | 1,008                      | 1.83%                     | 784        | <b>1.1026e-4</b> | 1.1911                | 154                      | 180               | 1.00%                   |
| <a href="#">abnormal renal glomerulus morphology</a>                                     | 266        | <b>5.1081e-98</b>  | <b>1.7609e-96</b>  | 2.0123                | 1,108                      | 2.02%                     | 353        | <b>5.4280e-9</b> | 1.2395                | 203                      | 228               | 1.32%                   |

The test set of 54,935 genomic regions picked 15,368 (72%) of all 21,395 genes.  
*Mouse Phenotype Single KO* has 9,170 terms covering 9,466 (44%) of all 21,395 genes, and 551,620 term - gene associations.  
 9,170 ontology terms (100%) were tested using an annotation count range of [1, Inf].

☐ Mouse Phenotype (20+ terms)

Global controls

Table controls:  Shown top rows in this table:   Term annotation count: Min:  Max:   Visualize this table:

| Term Name                                                | Binom Rank | Binom Raw P-Value  | Binom FDR Q-Val    | Binom Fold Enrichment | Binom Observed Region Hits | Binom Region Set Coverage | Hyper Rank | Hyper FDR Q-Val   | Hyper Fold Enrichment | Hyper Observed Gene Hits | Hyper Total Genes | Hyper Gene Set Coverage |
|----------------------------------------------------------|------------|--------------------|--------------------|-----------------------|----------------------------|---------------------------|------------|-------------------|-----------------------|--------------------------|-------------------|-------------------------|
| <a href="#">abnormal craniofacial development</a>        | 104        | <b>3.5940e-262</b> | <b>3.3089e-260</b> | 2.1989                | 2,397                      | 4.36%                     | 198        | <b>2.1192e-18</b> | 1.2604                | 354                      | 391               | 2.30%                   |
| <a href="#">abnormal eye development</a>                 | 137        | <b>3.1929e-224</b> | <b>2.2315e-222</b> | 2.2484                | 1,959                      | 3.57%                     | 301        | <b>1.6482e-13</b> | 1.2461                | 290                      | 324               | 1.89%                   |
| <a href="#">abnormal cartilage morphology</a>            | 151        | <b>1.0504e-214</b> | <b>6.6607e-213</b> | 2.0711                | 2,256                      | 4.11%                     | 120        | <b>8.8151e-26</b> | 1.3003                | 368                      | 394               | 2.39%                   |
| <a href="#">perinatal lethality, complete penetrance</a> | 158        | <b>2.3018e-208</b> | <b>1.3949e-206</b> | 2.1959                | 1,917                      | 3.49%                     | 312        | <b>3.9051e-13</b> | 1.2443                | 286                      | 320               | 1.86%                   |
| <a href="#">abnormal angiogenesis</a>                    | 167        | <b>1.5490e-196</b> | <b>8.8811e-195</b> | 2.0013                | 2,248                      | 4.09%                     | 137        | <b>1.6146e-23</b> | 1.2838                | 379                      | 411               | 2.47%                   |
| <a href="#">abnormal autopod morphology</a>              | 174        | <b>2.4197e-188</b> | <b>1.3315e-186</b> | 2.0268                | 2,089                      | 3.80%                     | 314        | <b>4.1843e-13</b> | 1.2221                | 345                      | 393               | 2.24%                   |
| <a href="#">abnormal neurocranium morphology</a>         | 179        | <b>3.2132e-186</b> | <b>1.7188e-184</b> | 2.2005                | 1,707                      | 3.11%                     | 360        | <b>1.2193e-11</b> | 1.2464                | 248                      | 277               | 1.61%                   |
| <a href="#">abnormal tail morphology</a>                 | 186        | <b>5.3958e-182</b> | <b>2.7777e-180</b> | 2.0082                | 2,066                      | 3.76%                     | 239        | <b>8.5275e-16</b> | 1.2371                | 367                      | 413               | 2.39%                   |
| <a href="#">abnormal joint morphology</a>                | 189        | <b>8.5176e-181</b> | <b>4.3151e-179</b> | 2.1142                | 1,814                      | 3.30%                     | 214        | <b>4.5683e-17</b> | 1.2686                | 308                      | 338               | 2.00%                   |
| <a href="#">abnormal palate morphology</a>               | 196        | <b>3.2595e-177</b> | <b>1.5923e-175</b> | 2.0465                | 1,921                      | 3.50%                     | 405        | <b>1.0878e-10</b> | 1.2187                | 288                      | 329               | 1.87%                   |
| <a href="#">abnormal neural tube closure</a>             | 198        | <b>6.5162e-177</b> | <b>3.1511e-175</b> | 2.0368                | 1,940                      | 3.53%                     | 396        | <b>8.7964e-11</b> | 1.2041                | 333                      | 385               | 2.17%                   |
| <a href="#">abnormal eyelid morphology</a>               | 204        | <b>1.5765e-171</b> | <b>7.3997e-170</b> | 2.1930                | 1,585                      | 2.89%                     | 289        | <b>9.6899e-14</b> | 1.2739                | 237                      | 259               | 1.54%                   |
| <a href="#">abnormal spinal cord morphology</a>          | 215        | <b>5.9663e-163</b> | <b>2.6571e-161</b> | 2.0183                | 1,829                      | 3.33%                     | 223        | <b>2.6228e-16</b> | 1.2619                | 310                      | 342               | 2.02%                   |
| <a href="#">abnormal forebrain development</a>           | 218        | <b>1.3470e-161</b> | <b>5.9163e-160</b> | 2.1687                | 1,531                      | 2.79%                     | 409        | <b>1.3220e-10</b> | 1.2448                | 228                      | 255               | 1.48%                   |

| Term Name                                                   | Binom Rank | Binom Raw P-Value  | Binom FDR Q-Val    | Binom Fold Enrichment | Binom Observed Region Hits | Binom Region Set Coverage | Hyper Rank | Hyper FDR Q-Val   | Hyper Fold Enrichment | Hyper Observed Gene Hits | Hyper Total Genes | Hyper Gene Set Coverage |
|-------------------------------------------------------------|------------|--------------------|--------------------|-----------------------|----------------------------|---------------------------|------------|-------------------|-----------------------|--------------------------|-------------------|-------------------------|
| <a href="#">abnormal epidermal layer morphology</a>         | 235        | <b>1.2759e-150</b> | <b>5.1988e-149</b> | 2.0175                | 1,693                      | 3.08%                     | 320        | <b>6.3471e-13</b> | 1.2298                | 318                      | 360               | 2.07%                   |
| <a href="#">abnormal pectoral girdle bone morphology</a>    | 244        | <b>7.9106e-148</b> | <b>3.1042e-146</b> | 2.0856                | 1,533                      | 2.79%                     | 313        | <b>4.1338e-13</b> | 1.2633                | 245                      | 270               | 1.59%                   |
| <a href="#">exencephaly</a>                                 | 281        | <b>1.1637e-127</b> | <b>3.9652e-126</b> | 2.0543                | 1,373                      | 2.50%                     | 788        | <b>4.0465e-6</b>  | 1.1820                | 225                      | 265               | 1.46%                   |
| <a href="#">abnormal spinal cord grey matter morphology</a> | 283        | <b>5.3482e-127</b> | <b>1.8095e-125</b> | 2.0836                | 1,320                      | 2.40%                     | 316        | <b>4.2156e-13</b> | 1.2796                | 216                      | 235               | 1.41%                   |
| <a href="#">abnormal brainstem morphology</a>               | 285        | <b>1.2911e-125</b> | <b>4.3378e-124</b> | 2.0493                | 1,359                      | 2.47%                     | 311        | <b>3.2870e-13</b> | 1.2771                | 222                      | 242               | 1.44%                   |
| <a href="#">abnormal eye size</a>                           | 286        | <b>1.3919e-125</b> | <b>4.6600e-124</b> | 2.1194                | 1,254                      | 2.28%                     | 643        | <b>2.9082e-7</b>  | 1.2166                | 194                      | 222               | 1.26%                   |

The test set of 54,935 genomic regions picked 15,368 (72%) of all 21,395 genes.

*Mouse Phenotype* has 9,575 terms covering 9,654 (45%) of all 21,395 genes, and 705,265 term - gene associations. 9,575 ontology terms (100%) were tested using an annotation count range of [1, Inf].
