# Supplementary material for: AP-2α and AP-2β cooperatively function in the craniofacial surface ectoderm to regulate chromatin and gene expression dynamics during facial development
Source: eLife journal article supplement (doi:10.7554/elife.70511), 2022-03-25
Supplement: supp [file elife-70511-supp-v1.zip]

# Homer Known Motif Enrichment Results (/Users/vanottee/output2/)

[Homer de novo Motif Results](#)
[Gene Ontology Enrichment Results](#)
[Known Motif Enrichment Results \(txt file\)](#)

Total Target Sequences = 24808, Total Background Sequences = 24866

| Rank | Motif | Name                                                  | P-value | log P-value | q-value (Benjamini) | # Target Sequences with Motif | % of Targets Sequences with Motif | # Background Sequences with Motif | % of Background Sequences with Motif | Motif File                          | SVG                 |
|------|-------|-------------------------------------------------------|---------|-------------|---------------------|-------------------------------|-----------------------------------|-----------------------------------|--------------------------------------|-------------------------------------|---------------------|
| 1    |       | CTCF(Zf)/CD4+-CTCF-ChIP-Seq(Barski_et_al.)/Homer      | 1e-1276 | -2.938e+03  | 0.0000              | 4788.0                        | 19.30%                            | 1337.8                            | 5.38%                                | <a href="#">motif file (matrix)</a> | <a href="#">svg</a> |
| 2    |       | BORIS(Zf)/K562-CTCF-L-ChIP-Seq(GSE32465)/Homer        | 1e-1067 | -2.458e+03  | 0.0000              | 5600.0                        | 22.58%                            | 2012.5                            | 8.09%                                | <a href="#">motif file (matrix)</a> | <a href="#">svg</a> |
| 3    |       | p73(p53)/Trachea-p73-ChIP-Seq(PRJNA310161)/Homer      | 1e-436  | -1.006e+03  | 0.0000              | 1542.0                        | 6.22%                             | 389.6                             | 1.57%                                | <a href="#">motif file (matrix)</a> | <a href="#">svg</a> |
| 4    |       | p53(p53)/Saos-p53-ChIP-Seq(GSE15780)/Homer            | 1e-417  | -9.620e+02  | 0.0000              | 2231.0                        | 8.99%                             | 772.5                             | 3.11%                                | <a href="#">motif file (matrix)</a> | <a href="#">svg</a> |
| 5    |       | p53(p53)/Saos-p53-ChIP-Seq/Homer                      | 1e-417  | -9.620e+02  | 0.0000              | 2231.0                        | 8.99%                             | 772.5                             | 3.11%                                | <a href="#">motif file (matrix)</a> | <a href="#">svg</a> |
| 6    |       | TEAD1(TEAD)/HepG2-TEAD1-ChIP-Seq(Encode)/Homer        | 1e-399  | -9.202e+02  | 0.0000              | 9404.0                        | 37.91%                            | 6352.4                            | 25.54%                               | <a href="#">motif file (matrix)</a> | <a href="#">svg</a> |
| 7    |       | TEAD4(TEA)/Tropoblast-Tead4-ChIP-Seq(GSE37350)/Homer  | 1e-365  | -8.415e+02  | 0.0000              | 8833.0                        | 35.61%                            | 5969.0                            | 24.00%                               | <a href="#">motif file (matrix)</a> | <a href="#">svg</a> |
| 8    |       | TEAD(TEA)/Fibroblast-PU.1-ChIP-Seq(Unpublished)/Homer | 1e-359  | -8.274e+02  | 0.0000              | 6773.0                        | 27.30%                            | 4222.2                            | 16.98%                               | <a href="#">motif file (matrix)</a> | <a href="#">svg</a> |
| 9    |       | p63(p53)/Keratinocyte-p63-ChIP-Seq(GSE17611)/Homer    | 1e-357  | -8.243e+02  | 0.0000              | 5510.0                        | 22.21%                            | 3199.3                            | 12.86%                               | <a href="#">motif file (matrix)</a> | <a href="#">svg</a> |
| 10   |       | TEAD3(TEA)/HepG2-TEAD3-ChIP-Seq(Encode)/Homer         | 1e-350  | -8.074e+02  | 0.0000              | 10258.0                       | 41.35%                            | 7308.5                            | 29.39%                               | <a href="#">motif file (matrix)</a> | <a href="#">svg</a> |
| 11   |       | TEAD2(TEA)/Py2T-Tead2-ChIP-Seq(GSE55709)/Homer        | 1e-308  | -7.104e+02  | 0.0000              | 6009.0                        | 24.22%                            | 3751.8                            | 15.09%                               | <a href="#">motif file (matrix)</a> | <a href="#">svg</a> |
| 12   |       | AP-2alpha(AP2)/Hela-AP2alpha-ChIP-Seq(GSE31477)/Homer | 1e-215  | -4.971e+02  | 0.0000              | 9649.0                        | 38.90%                            | 7352.6                            | 29.57%                               | <a href="#">motif file (matrix)</a> | <a href="#">svg</a> |
| 13   |       | AP-2gamma(AP2)/MCF7-TFAP2C-ChIP-Seq(GSE21234)/Homer   | 1e-195  | -4.507e+02  | 0.0000              | 11429.0                       | 46.08%                            | 9150.5                            | 36.79%                               | <a href="#">motif file (matrix)</a> | <a href="#">svg</a> |
| 14   |       | Zfp281(Zf)/ES-Zfp281-ChIP-Seq(GSE81042)/Homer         | 1e-137  | -3.172e+02  | 0.0000              | 4186.0                        | 16.88%                            | 2860.1                            | 11.50%                               | <a href="#">motif file (matrix)</a> | <a href="#">svg</a> |
| 15   |       | GRHL2(CP2)/HBE-GRHL2-ChIP-                            | 1e-     | -2.733e+02  | 0.0000              | 4054.0                        | 16.34%                            | 2834.7                            | 11.40%                               | <a href="#">motif file (matrix)</a> | <a href="#">svg</a> |

|    |                                                                                     |                                                                   |        |            |        |         |        |        |        |                                                           |                     |
|----|-------------------------------------------------------------------------------------|-------------------------------------------------------------------|--------|------------|--------|---------|--------|--------|--------|-----------------------------------------------------------|---------------------|
|    |     | Seq(GSE46194)/Homer                                               | 118    |            |        |         |        |        |        | <a href="#">file</a><br>(matrix)                          |                     |
| 16 |    | Six4(Homeobox)/MCF7-SIX4-ChIP-Seq(Encode)/Homer                   | 1e-108 | -2.495e+02 | 0.0000 | 789.0   | 3.18%  | 322.1  | 1.30%  | <a href="#">motif</a><br><a href="#">file</a><br>(matrix) | <a href="#">svg</a> |
| 17 |    | REST-NRSF(Zf)/Jurkat-NRSF-ChIP-Seq/Homer                          | 1e-105 | -2.429e+02 | 0.0000 | 316.0   | 1.27%  | 68.5   | 0.28%  | <a href="#">motif</a><br><a href="#">file</a><br>(matrix) | <a href="#">svg</a> |
| 18 |    | Dlx3(Homeobox)/Kerainocytes-Dlx3-ChIP-Seq(GSE89884)/Homer         | 1e-95  | -2.195e+02 | 0.0000 | 4413.0  | 17.79% | 3266.7 | 13.14% | <a href="#">motif</a><br><a href="#">file</a><br>(matrix) | <a href="#">svg</a> |
| 19 |    | Six1(Homeobox)/Myoblast-Six1-ChIP-Chip(GSE20150)/Homer            | 1e-90  | -2.086e+02 | 0.0000 | 2443.0  | 9.85%  | 1607.5 | 6.46%  | <a href="#">motif</a><br><a href="#">file</a><br>(matrix) | <a href="#">svg</a> |
| 20 |    | DLX5(Homeobox)/BasalGanglia-Dlx5-ChIP-seq(GSE124936)/Homer        | 1e-83  | -1.929e+02 | 0.0000 | 5179.0  | 20.88% | 4022.0 | 16.17% | <a href="#">motif</a><br><a href="#">file</a><br>(matrix) | <a href="#">svg</a> |
| 21 |    | KLF3(Zf)/MEF-Klf3-ChIP-Seq(GSE44748)/Homer                        | 1e-82  | -1.906e+02 | 0.0000 | 6365.0  | 25.66% | 5113.3 | 20.56% | <a href="#">motif</a><br><a href="#">file</a><br>(matrix) | <a href="#">svg</a> |
| 22 |    | Pbx3(Homeobox)/GM12878-PBX3-ChIP-Seq(GSE32465)/Homer              | 1e-79  | -1.836e+02 | 0.0000 | 2947.0  | 11.88% | 2078.0 | 8.36%  | <a href="#">motif</a><br><a href="#">file</a><br>(matrix) | <a href="#">svg</a> |
| 23 |    | Sp1(Zf)/Promoter/Homer                                            | 1e-74  | -1.718e+02 | 0.0000 | 3314.0  | 13.36% | 2421.3 | 9.74%  | <a href="#">motif</a><br><a href="#">file</a><br>(matrix) | <a href="#">svg</a> |
| 24 |    | Sp5(Zf)/mES-Sp5.Flag-ChIP-Seq(GSE72989)/Homer                     | 1e-71  | -1.650e+02 | 0.0000 | 10357.0 | 41.75% | 9007.5 | 36.22% | <a href="#">motif</a><br><a href="#">file</a><br>(matrix) | <a href="#">svg</a> |
| 25 |    | Klf9(Zf)/GBM-Klf9-ChIP-Seq(GSE62211)/Homer                        | 1e-68  | -1.571e+02 | 0.0000 | 5337.0  | 21.52% | 4275.5 | 17.19% | <a href="#">motif</a><br><a href="#">file</a><br>(matrix) | <a href="#">svg</a> |
| 26 |    | Pknox1(Homeobox)/ES-Prep1-ChIP-Seq(GSE63282)/Homer                | 1e-65  | -1.508e+02 | 0.0000 | 2760.0  | 11.13% | 1992.3 | 8.01%  | <a href="#">motif</a><br><a href="#">file</a><br>(matrix) | <a href="#">svg</a> |
| 27 |   | PBX1(Homeobox)/MCF7-PBX1-ChIP-Seq(GSE28007)/Homer                 | 1e-64  | -1.489e+02 | 0.0000 | 1231.0  | 4.96%  | 735.5  | 2.96%  | <a href="#">motif</a><br><a href="#">file</a><br>(matrix) | <a href="#">svg</a> |
| 28 |  | Tcf3(HMG)/mES-Tcf3-ChIP-Seq(GSE11724)/Homer                       | 1e-61  | -1.417e+02 | 0.0000 | 2446.0  | 9.86%  | 1744.7 | 7.02%  | <a href="#">motif</a><br><a href="#">file</a><br>(matrix) | <a href="#">svg</a> |
| 29 |  | KLF1(Zf)/HUDEP2-KLF1-CutnRun(GSE136251)/Homer                     | 1e-53  | -1.235e+02 | 0.0000 | 9563.0  | 38.55% | 8418.6 | 33.85% | <a href="#">motif</a><br><a href="#">file</a><br>(matrix) | <a href="#">svg</a> |
| 30 |  | Klf4(Zf)/mES-Klf4-ChIP-Seq(GSE11431)/Homer                        | 1e-53  | -1.232e+02 | 0.0000 | 4750.0  | 19.15% | 3853.0 | 15.49% | <a href="#">motif</a><br><a href="#">file</a><br>(matrix) | <a href="#">svg</a> |
| 31 |  | TCFL2(HMG)/K562-TCF7L2-ChIP-Seq(GSE29196)/Homer                   | 1e-52  | -1.217e+02 | 0.0000 | 968.0   | 3.90%  | 571.6  | 2.30%  | <a href="#">motif</a><br><a href="#">file</a><br>(matrix) | <a href="#">svg</a> |
| 32 |  | CTCF-SatelliteElement(Zf)/CD4+-CTCF-ChIP-Seq(Barski_et_al.)/Homer | 1e-50  | -1.166e+02 | 0.0000 | 396.0   | 1.60%  | 168.3  | 0.68%  | <a href="#">motif</a><br><a href="#">file</a><br>(matrix) | <a href="#">svg</a> |
| 33 |                                                                                     | p53(p53)/mES-cMyc-ChIP-Seq(GSE11431)/Homer                        | 1e-43  | -1.006e+02 | 0.0000 | 354.0   | 1.43%  | 153.1  | 0.62%  | <a href="#">motif</a><br><a href="#">file</a>             | <a href="#">svg</a> |

|    |                                                                                     |                                                                  |       |            |        |        |        |        |        |                                     |                     |
|----|-------------------------------------------------------------------------------------|------------------------------------------------------------------|-------|------------|--------|--------|--------|--------|--------|-------------------------------------|---------------------|
|    |     |                                                                  |       |            |        |        |        |        |        | <a href="#">(matrix)</a>            |                     |
| 34 |    | Tcf7(HMG)/GM12878-TCF7-ChIP-Seq(Encode)/Homer                    | 1e-42 | -9.741e+01 | 0.0000 | 2922.0 | 11.78% | 2280.7 | 9.17%  | <a href="#">motif file (matrix)</a> | <a href="#">svg</a> |
| 35 |    | Foxa3(Forkhead)/Liver-Foxa3-ChIP-Seq(GSE77670)/Homer             | 1e-41 | -9.593e+01 | 0.0000 | 2460.0 | 9.92%  | 1874.1 | 7.54%  | <a href="#">motif file (matrix)</a> | <a href="#">svg</a> |
| 36 |    | WT1(Zf)/Kidney-WT1-ChIP-Seq(GSE90016)/Homer                      | 1e-41 | -9.531e+01 | 0.0000 | 6521.0 | 26.29% | 5626.1 | 22.62% | <a href="#">motif file (matrix)</a> | <a href="#">svg</a> |
| 37 |    | Six2(Homeobox)/NephronProgenitor-Six2-ChIP-Seq(GSE39837)/Homer   | 1e-41 | -9.492e+01 | 0.0000 | 7276.0 | 29.33% | 6349.2 | 25.53% | <a href="#">motif file (matrix)</a> | <a href="#">svg</a> |
| 38 |    | EKLF(Zf)/Erythrocyte-Klf1-ChIP-Seq(GSE20478)/Homer               | 1e-40 | -9.352e+01 | 0.0000 | 2728.0 | 11.00% | 2119.7 | 8.52%  | <a href="#">motif file (matrix)</a> | <a href="#">svg</a> |
| 39 |    | RFX(HTH)/K562-RFX3-ChIP-Seq(SRA012198)/Homer                     | 1e-39 | -8.998e+01 | 0.0000 | 1082.0 | 4.36%  | 712.8  | 2.87%  | <a href="#">motif file (matrix)</a> | <a href="#">svg</a> |
| 40 |    | X-box(HTH)/NPC-H3K4me1-ChIP-Seq(GSE16256)/Homer                  | 1e-38 | -8.833e+01 | 0.0000 | 1193.0 | 4.81%  | 806.6  | 3.24%  | <a href="#">motif file (matrix)</a> | <a href="#">svg</a> |
| 41 |    | LEF1(HMG)/H1-LEF1-ChIP-Seq(GSE64758)/Homer                       | 1e-38 | -8.828e+01 | 0.0000 | 5263.0 | 21.22% | 4469.3 | 17.97% | <a href="#">motif file (matrix)</a> | <a href="#">svg</a> |
| 42 |    | Rfx2(HTH)/LoVo-RFX2-ChIP-Seq(GSE49402)/Homer                     | 1e-37 | -8.742e+01 | 0.0000 | 1175.0 | 4.74%  | 793.8  | 3.19%  | <a href="#">motif file (matrix)</a> | <a href="#">svg</a> |
| 43 |    | DLX1(Homeobox)/BasalGanglia-Dlx1-ChIP-seq(GSE124936)/Homer       | 1e-32 | -7.503e+01 | 0.0000 | 7957.0 | 32.08% | 7113.5 | 28.60% | <a href="#">motif file (matrix)</a> | <a href="#">svg</a> |
| 44 |    | Tcfcp2l1(CP2)/mES-Tcfcp2l1-ChIP-Seq(GSE11431)/Homer              | 1e-29 | -6.710e+01 | 0.0000 | 1885.0 | 7.60%  | 1453.2 | 5.84%  | <a href="#">motif file (matrix)</a> | <a href="#">svg</a> |
| 45 |   | NFkB-p65(RHD)/GM12787-p65-ChIP-Seq(GSE19485)/Homer               | 1e-24 | -5.601e+01 | 0.0000 | 4372.0 | 17.63% | 3788.8 | 15.23% | <a href="#">motif file (matrix)</a> | <a href="#">svg</a> |
| 46 |  | Lhx2(Homeobox)/HFSC-Lhx2-ChIP-Seq(GSE48068)/Homer                | 1e-23 | -5.469e+01 | 0.0000 | 6523.0 | 26.30% | 5851.8 | 23.53% | <a href="#">motif file (matrix)</a> | <a href="#">svg</a> |
| 47 |  | DLX2(Homeobox)/BasalGanglia-Dlx2-ChIP-seq(GSE124936)/Homer       | 1e-23 | -5.389e+01 | 0.0000 | 8754.0 | 35.29% | 8027.1 | 32.28% | <a href="#">motif file (matrix)</a> | <a href="#">svg</a> |
| 48 |  | E2F4(E2F)/K562-E2F4-ChIP-Seq(GSE31477)/Homer                     | 1e-22 | -5.268e+01 | 0.0000 | 3245.0 | 13.08% | 2748.1 | 11.05% | <a href="#">motif file (matrix)</a> | <a href="#">svg</a> |
| 49 |  | Zfp809(Zf)/ES-Zfp809-ChIP-Seq(GSE70799)/Homer                    | 1e-22 | -5.107e+01 | 0.0000 | 2364.0 | 9.53%  | 1942.6 | 7.81%  | <a href="#">motif file (matrix)</a> | <a href="#">svg</a> |
| 50 |  | Egr2(Zf)/Thymocytes-Egr2-ChIP-Seq(GSE34254)/Homer                | 1e-22 | -5.095e+01 | 0.0000 | 1942.0 | 7.83%  | 1559.8 | 6.27%  | <a href="#">motif file (matrix)</a> | <a href="#">svg</a> |
| 51 |                                                                                     | NFkB-p50,p52(RHD)/Monocyte-p50-ChIP-Chip(Schreiber_et_al.)/Homer | 1e-21 | -4.931e+01 | 0.0000 | 1199.0 | 4.83%  | 904.7  | 3.64%  | <a href="#">motif file</a>          | <a href="#">svg</a> |

|    |     |                                                              |       |            |        |         |        |         |        |                                                        | <a href="#">(matrix)</a> |  |
|----|-------------------------------------------------------------------------------------|--------------------------------------------------------------|-------|------------|--------|---------|--------|---------|--------|--------------------------------------------------------|--------------------------|--|
| 52 |    | Fra1(bZIP)/BT549-Fra1-ChIP-Seq(GSE46166)/Homer               | 1e-19 | -4.488e+01 | 0.0000 | 3787.0  | 15.27% | 3297.7  | 13.26% | <a href="#">motif file</a><br><a href="#">(matrix)</a> | <a href="#">svg</a>      |  |
| 53 |    | Lhx1(Homeobox)/EmbryoCarcinoma-Lhx1-ChIP-Seq(GSE70957)/Homer | 1e-18 | -4.315e+01 | 0.0000 | 6533.0  | 26.34% | 5940.6  | 23.89% | <a href="#">motif file</a><br><a href="#">(matrix)</a> | <a href="#">svg</a>      |  |
| 54 |    | E2F3(E2F)/MEF-E2F3-ChIP-Seq(GSE71376)/Homer                  | 1e-18 | -4.241e+01 | 0.0000 | 4783.0  | 19.28% | 4259.9  | 17.13% | <a href="#">motif file</a><br><a href="#">(matrix)</a> | <a href="#">svg</a>      |  |
| 55 |    | KLF6(Zf)/PDAC-KLF6-ChIP-Seq(GSE64557)/Homer                  | 1e-18 | -4.237e+01 | 0.0000 | 10122.0 | 40.81% | 9465.7  | 38.06% | <a href="#">motif file</a><br><a href="#">(matrix)</a> | <a href="#">svg</a>      |  |
| 56 |    | Egr1(Zf)/K562-Egr1-ChIP-Seq(GSE32465)/Homer                  | 1e-17 | -3.977e+01 | 0.0000 | 6837.0  | 27.56% | 6261.8  | 25.18% | <a href="#">motif file</a><br><a href="#">(matrix)</a> | <a href="#">svg</a>      |  |
| 57 |    | Fra2(bZIP)/Striatum-Fra2-ChIP-Seq(GSE43429)/Homer            | 1e-17 | -3.936e+01 | 0.0000 | 3425.0  | 13.81% | 2987.6  | 12.01% | <a href="#">motif file</a><br><a href="#">(matrix)</a> | <a href="#">svg</a>      |  |
| 58 |    | Arnt:Ahr(bHLH)/MCF7-Arnt-ChIP-Seq(Lo_et_al.)/Homer           | 1e-16 | -3.815e+01 | 0.0000 | 5261.0  | 21.21% | 4747.4  | 19.09% | <a href="#">motif file</a><br><a href="#">(matrix)</a> | <a href="#">svg</a>      |  |
| 59 |    | Tbx20(T-box)/Heart-Tbx20-ChIP-Seq(GSE29636)/Homer            | 1e-16 | -3.778e+01 | 0.0000 | 2177.0  | 8.78%  | 1829.3  | 7.36%  | <a href="#">motif file</a><br><a href="#">(matrix)</a> | <a href="#">svg</a>      |  |
| 60 |    | Foxo3(Forkhead)/U2OS-Foxo3-ChIP-Seq(E-MTAB-2701)/Homer       | 1e-16 | -3.773e+01 | 0.0000 | 4722.0  | 19.04% | 4232.7  | 17.02% | <a href="#">motif file</a><br><a href="#">(matrix)</a> | <a href="#">svg</a>      |  |
| 61 |    | HIF2a(bHLH)/785_O-HIF2a-ChIP-Seq(GSE34871)/Homer             | 1e-16 | -3.734e+01 | 0.0000 | 2628.0  | 10.59% | 2250.6  | 9.05%  | <a href="#">motif file</a><br><a href="#">(matrix)</a> | <a href="#">svg</a>      |  |
| 62 |    | JunB(bZIP)/DendriticCells-Junb-ChIP-Seq(GSE36099)/Homer      | 1e-15 | -3.483e+01 | 0.0000 | 3811.0  | 15.36% | 3381.1  | 13.60% | <a href="#">motif file</a><br><a href="#">(matrix)</a> | <a href="#">svg</a>      |  |
| 63 |   | E2F7(E2F)/Hela-E2F7-ChIP-Seq(GSE32673)/Homer                 | 1e-15 | -3.464e+01 | 0.0000 | 928.0   | 3.74%  | 711.2   | 2.86%  | <a href="#">motif file</a><br><a href="#">(matrix)</a> | <a href="#">svg</a>      |  |
| 64 |  | NF1(CTF)/LNCAP-NF1-ChIP-Seq(Unpublished)/Homer               | 1e-14 | -3.390e+01 | 0.0000 | 3987.0  | 16.07% | 3555.7  | 14.30% | <a href="#">motif file</a><br><a href="#">(matrix)</a> | <a href="#">svg</a>      |  |
| 65 |  | Fosl2(bZIP)/3T3L1-Fosl2-ChIP-Seq(GSE56872)/Homer             | 1e-14 | -3.349e+01 | 0.0000 | 2579.0  | 10.40% | 2225.5  | 8.95%  | <a href="#">motif file</a><br><a href="#">(matrix)</a> | <a href="#">svg</a>      |  |
| 66 |  | NFkB-p65-Rel(RHD)/ThioMac-LPS-Expression(GSE23622)/Homer     | 1e-14 | -3.281e+01 | 0.0000 | 551.0   | 2.22%  | 391.1   | 1.57%  | <a href="#">motif file</a><br><a href="#">(matrix)</a> | <a href="#">svg</a>      |  |
| 67 |  | Atf3(bZIP)/GBM-ATF3-ChIP-Seq(GSE33912)/Homer                 | 1e-13 | -3.185e+01 | 0.0000 | 4450.0  | 17.94% | 4013.2  | 16.14% | <a href="#">motif file</a><br><a href="#">(matrix)</a> | <a href="#">svg</a>      |  |
| 68 |  | KLF5(Zf)/LoVo-KLF5-ChIP-Seq(GSE49402)/Homer                  | 1e-13 | -3.160e+01 | 0.0000 | 11741.0 | 47.33% | 11175.0 | 44.94% | <a href="#">motif file</a><br><a href="#">(matrix)</a> | <a href="#">svg</a>      |  |
| 69 |                                                                                     | FOXP1(Forkhead)/H9-FOXP1-ChIP-Seq(GSE31006)/Homer            | 1e-13 | -3.030e+01 | 0.0000 | 2988.0  | 12.05% | 2629.5  | 10.57% | <a href="#">motif file</a>                             | <a href="#">svg</a>      |  |



|    |  |                                                        |       |            |        |         |        |         |        |                                     |                     |
|----|--|--------------------------------------------------------|-------|------------|--------|---------|--------|---------|--------|-------------------------------------|---------------------|
|    |  |                                                        |       |            |        |         |        |         |        | <a href="#">(matrix)</a>            |                     |
| 70 |  | Jun-AP1(bZIP)/K562-cJun-ChIP-Seq(GSE31477)/Homer       | 1e-13 | -2.998e+01 | 0.0000 | 1899.0  | 7.66%  | 1610.9  | 6.48%  | <a href="#">motif file (matrix)</a> | <a href="#">svg</a> |
| 71 |  | Foxa2(Forkhead)/Liver-Foxa2-ChIP-Seq(GSE25694)/Homer   | 1e-12 | -2.973e+01 | 0.0000 | 5419.0  | 21.85% | 4965.4  | 19.97% | <a href="#">motif file (matrix)</a> | <a href="#">svg</a> |
| 72 |  | Zic2(Zf)/ESC-Zic2-ChIP-Seq(SRP197560)/Homer            | 1e-12 | -2.920e+01 | 0.0000 | 4931.0  | 19.88% | 4497.4  | 18.08% | <a href="#">motif file (matrix)</a> | <a href="#">svg</a> |
| 73 |  | AP-1(bZIP)/ThioMac-PU.1-ChIP-Seq(GSE21512)/Homer       | 1e-11 | -2.744e+01 | 0.0000 | 5012.0  | 20.21% | 4590.1  | 18.46% | <a href="#">motif file (matrix)</a> | <a href="#">svg</a> |
| 74 |  | E2F6(E2F)/Hela-E2F6-ChIP-Seq(GSE31477)/Homer           | 1e-11 | -2.684e+01 | 0.0000 | 4044.0  | 16.30% | 3661.9  | 14.73% | <a href="#">motif file (matrix)</a> | <a href="#">svg</a> |
| 75 |  | E2F1(E2F)/Hela-E2F1-ChIP-Seq(GSE22478)/Homer           | 1e-11 | -2.667e+01 | 0.0000 | 1747.0  | 7.04%  | 1486.0  | 5.98%  | <a href="#">motif file (matrix)</a> | <a href="#">svg</a> |
| 76 |  | EBF(EBF)/proBcell-EBF-ChIP-Seq(GSE21978)/Homer         | 1e-11 | -2.666e+01 | 0.0000 | 2360.0  | 9.51%  | 2059.2  | 8.28%  | <a href="#">motif file (matrix)</a> | <a href="#">svg</a> |
| 77 |  | FOXK2(Forkhead)/U2OS-FOXK2-ChIP-Seq(E-MTAB-2204)/Homer | 1e-11 | -2.610e+01 | 0.0000 | 4282.0  | 17.26% | 3896.5  | 15.67% | <a href="#">motif file (matrix)</a> | <a href="#">svg</a> |
| 78 |  | Maz(Zf)/HepG2-Maz-ChIP-Seq(GSE31477)/Homer             | 1e-10 | -2.460e+01 | 0.0000 | 11946.0 | 48.16% | 11456.7 | 46.07% | <a href="#">motif file (matrix)</a> | <a href="#">svg</a> |
| 79 |  | Zic3(Zf)/mES-Zic3-ChIP-Seq(GSE37889)/Homer             | 1e-10 | -2.390e+01 | 0.0000 | 6315.0  | 25.46% | 5891.2  | 23.69% | <a href="#">motif file (matrix)</a> | <a href="#">svg</a> |
| 80 |  | Bach2(bZIP)/OCILy7-Bach2-ChIP-Seq(GSE44420)/Homer      | 1e-10 | -2.386e+01 | 0.0000 | 1604.0  | 6.47%  | 1368.9  | 5.50%  | <a href="#">motif file (matrix)</a> | <a href="#">svg</a> |
| 81 |  | Zfp57(Zf)/H1-ZFP57.HA-ChIP-Seq(GSE115387)/Homer        | 1e-9  | -2.283e+01 | 0.0000 | 2839.0  | 11.45% | 2538.2  | 10.21% | <a href="#">motif file (matrix)</a> | <a href="#">svg</a> |
| 82 |  | c-Myc(bHLH)/LNCAP-cMyc-ChIP-Seq(Unpublished)/Homer     | 1e-9  | -2.236e+01 | 0.0000 | 3629.0  | 14.63% | 3298.7  | 13.26% | <a href="#">motif file (matrix)</a> | <a href="#">svg</a> |
| 83 |  | Tlx?(NR)/NPC-H3K4me1-ChIP-Seq(GSE16256)/Homer          | 1e-9  | -2.205e+01 | 0.0000 | 4648.0  | 18.74% | 4285.4  | 17.23% | <a href="#">motif file (matrix)</a> | <a href="#">svg</a> |
| 84 |  | BATF(bZIP)/Th17-BATF-ChIP-Seq(GSE39756)/Homer          | 1e-9  | -2.163e+01 | 0.0000 | 4416.0  | 17.80% | 4064.9  | 16.35% | <a href="#">motif file (matrix)</a> | <a href="#">svg</a> |
| 85 |  | PBX2(Homeobox)/K562-PBX2-ChIP-Seq(Encode)/Homer        | 1e-9  | -2.092e+01 | 0.0000 | 5103.0  | 20.57% | 4738.3  | 19.05% | <a href="#">motif file (matrix)</a> | <a href="#">svg</a> |
| 86 |  | EBF2(EBF)/BrownAdipose-EBF2-ChIP-Seq(GSE97114)/Homer   | 1e-8  | -2.065e+01 | 0.0000 | 8363.0  | 33.71% | 7941.8  | 31.93% | <a href="#">motif file (matrix)</a> | <a href="#">svg</a> |
| 87 |  | JunD(bZIP)/K562-JunD-ChIP-Seq/Homer                    | 1e-8  | -2.019e+01 | 0.0000 | 698.0   | 2.81%  | 557.0   | 2.24%  | <a href="#">motif file</a>          | <a href="#">svg</a> |

6/8

7/8

|     |                                                                                   |                                                                   |      |            |        |        |        |        |        |                                     |                     |
|-----|-----------------------------------------------------------------------------------|-------------------------------------------------------------------|------|------------|--------|--------|--------|--------|--------|-------------------------------------|---------------------|
|     |   |                                                                   |      |            |        |        |        |        |        | <a href="#">(matrix)</a>            |                     |
| 124 |  | ZNF165(Zf)/WHIM12-ZNF165-ChIP-Seq(GSE65937)/Homer                 | 1e-2 | -6.349e+00 | 0.0062 | 1380.0 | 5.56%  | 1280.2 | 5.15%  | <a href="#">motif file (matrix)</a> | <a href="#">svg</a> |
| 125 |  | CREB5(bZIP)/LNCaP-CREB5.V5-ChIP-Seq(GSE137775)/Homer              | 1e-2 | -5.927e+00 | 0.0093 | 2300.0 | 9.27%  | 2180.6 | 8.77%  | <a href="#">motif file (matrix)</a> | <a href="#">svg</a> |
| 126 |  | PAX6(Paired,Homeobox)/Forebrain-Pax6-ChIP-Seq(GSE66961)/Homer     | 1e-2 | -5.693e+00 | 0.0117 | 698.0  | 2.81%  | 631.5  | 2.54%  | <a href="#">motif file (matrix)</a> | <a href="#">svg</a> |
| 127 |  | DUX(Homeobox)/C2C12-Dux-ChIP-Seq(GSE87279)/Homer                  | 1e-2 | -5.621e+00 | 0.0125 | 17.0   | 0.07%  | 8.4    | 0.03%  | <a href="#">motif file (matrix)</a> | <a href="#">svg</a> |
| 128 |  | Pitx1:Ebox(Homeobox,bHLH)/Hindlimb-Pitx1-ChIP-Seq(GSE41591)/Homer | 1e-2 | -5.503e+00 | 0.0139 | 1060.0 | 4.27%  | 980.1  | 3.94%  | <a href="#">motif file (matrix)</a> | <a href="#">svg</a> |
| 129 |  | Atf4(bZIP)/MEF-Atf4-ChIP-Seq(GSE35681)/Homer                      | 1e-2 | -5.443e+00 | 0.0147 | 1420.0 | 5.72%  | 1330.0 | 5.35%  | <a href="#">motif file (matrix)</a> | <a href="#">svg</a> |
| 130 |  | MafF(bZIP)/HepG2-MafF-ChIP-Seq(GSE31477)/Homer                    | 1e-2 | -5.107e+00 | 0.0204 | 1496.0 | 6.03%  | 1407.7 | 5.66%  | <a href="#">motif file (matrix)</a> | <a href="#">svg</a> |
| 131 |  | Nrf2(bZIP)/Lymphoblast-Nrf2-ChIP-Seq(GSE37589)/Homer              | 1e-2 | -5.062e+00 | 0.0212 | 385.0  | 1.55%  | 339.9  | 1.37%  | <a href="#">motif file (matrix)</a> | <a href="#">svg</a> |
| 132 |  | STAT6(Stat)/CD4-Stat6-ChIP-Seq(GSE22104)/Homer                    | 1e-2 | -4.812e+00 | 0.0270 | 3270.0 | 13.18% | 3151.4 | 12.67% | <a href="#">motif file (matrix)</a> | <a href="#">svg</a> |
| 133 |  | NFIL3(bZIP)/HepG2-NFIL3-ChIP-Seq(Encode)/Homer                    | 1e-2 | -4.773e+00 | 0.0278 | 3114.0 | 12.55% | 2998.8 | 12.06% | <a href="#">motif file (matrix)</a> | <a href="#">svg</a> |
