# Supplementary material for: AP-2α and AP-2β cooperatively function in the craniofacial surface ectoderm to regulate chromatin and gene expression dynamics during facial development
Source: eLife journal article supplement (doi:10.7554/elife.70511), 2022-03-25
Supplement: supp [file elife-70511-supp-v1.zip]

# Homer Known Motif Enrichment Results (/Users/vanottee/output/)

[Homer de novo Motif Results](#)
[Gene Ontology Enrichment Results](#)
[Known Motif Enrichment Results \(txt file\)](#)

Total Target Sequences = 63641, Total Background Sequences = 62370

| Rank | Motif                                                                               | Name                                                  | P-value | log P-value | q-value (Benjamini) | # Target Sequences with Motif | % of Targets Sequences with Motif | # Background Sequences with Motif | % of Background Sequences with Motif | Motif File                          | SVG                 |
|------|-------------------------------------------------------------------------------------|-------------------------------------------------------|---------|-------------|---------------------|-------------------------------|-----------------------------------|-----------------------------------|--------------------------------------|-------------------------------------|---------------------|
| 1    |    | CTCF(Zf)/CD4+-CTCF-ChIP-Seq(Barski_et_al.)/Homer      | 1e-1933 | -4.451e+03  | 0.0000              | 10558.0                       | 16.59%                            | 3711.0                            | 5.95%                                | <a href="#">motif file (matrix)</a> | <a href="#">svg</a> |
| 2    |    | BORIS(Zf)/K562-CTCF-ChIP-Seq(GSE32465)/Homer          | 1e-1518 | -3.497e+03  | 0.0000              | 13347.0                       | 20.97%                            | 6116.4                            | 9.81%                                | <a href="#">motif file (matrix)</a> | <a href="#">svg</a> |
| 3    |    | p73(p53)/Trachea-p73-ChIP-Seq(PRJNA310161)/Homer      | 1e-961  | -2.215e+03  | 0.0000              | 3900.0                        | 6.13%                             | 1073.3                            | 1.72%                                | <a href="#">motif file (matrix)</a> | <a href="#">svg</a> |
| 4    |    | p53(p53)/Saos-p53-ChIP-Seq(GSE15780)/Homer            | 1e-828  | -1.908e+03  | 0.0000              | 5646.0                        | 8.87%                             | 2197.1                            | 3.53%                                | <a href="#">motif file (matrix)</a> | <a href="#">svg</a> |
| 5    |    | p53(p53)/Saos-p53-ChIP-Seq/Homer                      | 1e-828  | -1.908e+03  | 0.0000              | 5646.0                        | 8.87%                             | 2197.1                            | 3.53%                                | <a href="#">motif file (matrix)</a> | <a href="#">svg</a> |
| 6    |    | TEAD1(TEAD)/HepG2-TEAD1-ChIP-Seq(Encode)/Homer        | 1e-765  | -1.763e+03  | 0.0000              | 25316.0                       | 39.77%                            | 17944.7                           | 28.79%                               | <a href="#">motif file (matrix)</a> | <a href="#">svg</a> |
| 7    |    | TEAD4(TEA)/Tropoblast-Tead4-ChIP-Seq(GSE37350)/Homer  | 1e-732  | -1.686e+03  | 0.0000              | 23485.0                       | 36.89%                            | 16453.3                           | 26.40%                               | <a href="#">motif file (matrix)</a> | <a href="#">svg</a> |
| 8    |   | TEAD(TEA)/Fibroblast-PU.1-ChIP-Seq(Unpublished)/Homer | 1e-682  | -1.571e+03  | 0.0000              | 18212.0                       | 28.61%                            | 12081.8                           | 19.38%                               | <a href="#">motif file (matrix)</a> | <a href="#">svg</a> |
| 9    |  | TEAD3(TEA)/HepG2-TEAD3-ChIP-Seq(Encode)/Homer         | 1e-615  | -1.418e+03  | 0.0000              | 27633.0                       | 43.41%                            | 20736.9                           | 33.27%                               | <a href="#">motif file (matrix)</a> | <a href="#">svg</a> |
| 10   |  | TEAD2(TEA)/Py2T-Tead2-ChIP-Seq(GSE55709)/Homer        | 1e-612  | -1.411e+03  | 0.0000              | 15780.0                       | 24.79%                            | 10302.2                           | 16.53%                               | <a href="#">motif file (matrix)</a> | <a href="#">svg</a> |
| 11   |  | p63(p53)/Keratinocyte-p63-ChIP-Seq(GSE17611)/Homer    | 1e-574  | -1.322e+03  | 0.0000              | 13498.0                       | 21.20%                            | 8563.2                            | 13.74%                               | <a href="#">motif file (matrix)</a> | <a href="#">svg</a> |
| 12   |  | Sp1(Zf)/Promoter/Homer                                | 1e-417  | -9.620e+02  | 0.0000              | 12415.0                       | 19.50%                            | 8273.4                            | 13.27%                               | <a href="#">motif file (matrix)</a> | <a href="#">svg</a> |
| 13   |  | Six4(Homeobox)/MCF7-SIX4-ChIP-Seq(Encode)/Homer       | 1e-336  | -7.744e+02  | 0.0000              | 2371.0                        | 3.72%                             | 926.1                             | 1.49%                                | <a href="#">motif file (matrix)</a> | <a href="#">svg</a> |
| 14   |  | Six1(Homeobox)/Myoblast-Six1-ChIP-Seq(GSE20150)/Homer | 1e-287  | -6.615e+02  | 0.0000              | 7379.0                        | 11.59%                            | 4690.5                            | 7.53%                                | <a href="#">motif file (matrix)</a> | <a href="#">svg</a> |
| 15   |  | KLF3(Zf)/MEF-Klf3-ChIP-Seq(GSE44748)/Homer            | 1e-262  | -6.053e+02  | 0.0000              | 18778.0                       | 29.50%                            | 14657.0                           | 23.52%                               | <a href="#">motif file (matrix)</a> | <a href="#">svg</a> |

|    |  |                                                                |        |            |        |         |        |         |        |                                     |                     |
|----|--|----------------------------------------------------------------|--------|------------|--------|---------|--------|---------|--------|-------------------------------------|---------------------|
| 16 |  | GRHL2(CP2)/HBE-GRHL2-ChIP-Seq(GSE46194)/Homer                  | 1e-227 | -5.229e+02 | 0.0000 | 10765.0 | 16.91% | 7788.2  | 12.50% | <a href="#">motif file (matrix)</a> | <a href="#">svg</a> |
| 17 |  | Zfp281(Zf)/ES-Zfp281-ChIP-Seq(GSE81042)/Homer                  | 1e-199 | -4.594e+02 | 0.0000 | 10803.0 | 16.97% | 7981.4  | 12.81% | <a href="#">motif file (matrix)</a> | <a href="#">svg</a> |
| 18 |  | E2F4(E2F)/K562-E2F4-ChIP-Seq(GSE31477)/Homer                   | 1e-178 | -4.101e+02 | 0.0000 | 12491.0 | 19.62% | 9601.6  | 15.41% | <a href="#">motif file (matrix)</a> | <a href="#">svg</a> |
| 19 |  | Klf9(Zf)/GBM-Klf9-ChIP-Seq(GSE62211)/Homer                     | 1e-176 | -4.062e+02 | 0.0000 | 15756.0 | 24.75% | 12543.2 | 20.13% | <a href="#">motif file (matrix)</a> | <a href="#">svg</a> |
| 20 |  | RFX(HTH)/K562-RFX3-ChIP-Seq(SRA012198)/Homer                   | 1e-170 | -3.928e+02 | 0.0000 | 3470.0  | 5.45%  | 2055.7  | 3.30%  | <a href="#">motif file (matrix)</a> | <a href="#">svg</a> |
| 21 |  | Six2(Homeobox)/NephronProgenitor-Six2-ChIP-Seq(GSE39837)/Homer | 1e-160 | -3.688e+02 | 0.0000 | 21978.0 | 34.53% | 18428.8 | 29.57% | <a href="#">motif file (matrix)</a> | <a href="#">svg</a> |
| 22 |  | E2F7(E2F)/Hela-E2F7-ChIP-Seq(GSE32673)/Homer                   | 1e-155 | -3.584e+02 | 0.0000 | 4204.0  | 6.60%  | 2681.6  | 4.30%  | <a href="#">motif file (matrix)</a> | <a href="#">svg</a> |
| 23 |  | Rfx2(HTH)/LoVo-RFX2-ChIP-Seq(GSE49402)/Homer                   | 1e-149 | -3.440e+02 | 0.0000 | 3687.0  | 5.79%  | 2298.9  | 3.69%  | <a href="#">motif file (matrix)</a> | <a href="#">svg</a> |
| 24 |  | REST-NRSF(Zf)/Jurkat-NRSF-ChIP-Seq/Homer                       | 1e-145 | -3.349e+02 | 0.0000 | 683.0   | 1.07%  | 207.7   | 0.33%  | <a href="#">motif file (matrix)</a> | <a href="#">svg</a> |
| 25 |  | E2F1(E2F)/Hela-E2F1-ChIP-Seq(GSE22478)/Homer                   | 1e-140 | -3.234e+02 | 0.0000 | 7408.0  | 11.64% | 5412.1  | 8.68%  | <a href="#">motif file (matrix)</a> | <a href="#">svg</a> |
| 26 |  | Tcf3(HMG)/mES-Tcf3-ChIP-Seq(GSE11724)/Homer                    | 1e-132 | -3.061e+02 | 0.0000 | 7032.0  | 11.05% | 5136.4  | 8.24%  | <a href="#">motif file (matrix)</a> | <a href="#">svg</a> |
| 27 |  | Sp5(Zf)/mES-Sp5.Flag-ChIP-Seq(GSE72989)/Homer                  | 1e-124 | -2.859e+02 | 0.0000 | 28869.0 | 45.35% | 25368.5 | 40.70% | <a href="#">motif file (matrix)</a> | <a href="#">svg</a> |
| 28 |  | KLF1(Zf)/HUDEP2-KLF1-CutnRun(GSE136251)/Homer                  | 1e-118 | -2.720e+02 | 0.0000 | 26940.0 | 42.32% | 23583.7 | 37.84% | <a href="#">motif file (matrix)</a> | <a href="#">svg</a> |
| 29 |  | Klf4(Zf)/mES-Klf4-ChIP-Seq(GSE11431)/Homer                     | 1e-117 | -2.712e+02 | 0.0000 | 13522.0 | 21.24% | 11007.4 | 17.66% | <a href="#">motif file (matrix)</a> | <a href="#">svg</a> |
| 30 |  | DLX5(Homeobox)/BasalGanglia-Dlx5-ChIP-seq(GSE124936)/Homer     | 1e-111 | -2.564e+02 | 0.0000 | 14716.0 | 23.12% | 12160.4 | 19.51% | <a href="#">motif file (matrix)</a> | <a href="#">svg</a> |
| 31 |  | Pbx3(Homeobox)/GM12878-PBX3-ChIP-Seq(GSE32465)/Homer           | 1e-109 | -2.522e+02 | 0.0000 | 7674.0  | 12.06% | 5845.1  | 9.38%  | <a href="#">motif file (matrix)</a> | <a href="#">svg</a> |
| 32 |  | X-box(HTH)/NPC-H3K4me1-ChIP-Seq(GSE16256)/Homer                | 1e-109 | -2.515e+02 | 0.0000 | 3585.0  | 5.63%  | 2384.1  | 3.83%  | <a href="#">motif file (matrix)</a> | <a href="#">svg</a> |
| 33 |  | PBX1(Homeobox)/MCF7-PBX1-ChIP-Seq(GSE28007)/Homer              | 1e-108 | -2.502e+02 | 0.0000 | 3175.0  | 4.99%  | 2057.2  | 3.30%  | <a href="#">motif file (matrix)</a> | <a href="#">svg</a> |
| 34 |  | p53(p53)/mES-cMyc-ChIP-Seq(GSE11431)/Homer                     | 1e-99  | -2.294e+02 | 0.0000 | 904.0   | 1.42%  | 399.1   | 0.64%  | <a href="#">motif file (matrix)</a> | <a href="#">svg</a> |

|    |                                                                                     |                                                                    |       |            |        |         |        |         |        |                                     |                     |
|----|-------------------------------------------------------------------------------------|--------------------------------------------------------------------|-------|------------|--------|---------|--------|---------|--------|-------------------------------------|---------------------|
| 35 |     | Dlx3(Homeobox)/Kerainocytes-Dlx3-ChIP-Seq(GSE89884)/Homer          | 1e-97 | -2.244e+02 | 0.0000 | 12468.0 | 19.59% | 10238.9 | 16.43% | <a href="#">motif file (matrix)</a> | <a href="#">svg</a> |
| 36 |    | E2F3(E2F)/MEF-E2F3-ChIP-Seq(GSE71376)/Homer                        | 1e-96 | -2.215e+02 | 0.0000 | 16301.0 | 25.61% | 13783.0 | 22.11% | <a href="#">motif file (matrix)</a> | <a href="#">svg</a> |
| 37 |    | Zfp57(Zf)/H1-ZFP57.HA-ChIP-Seq(GSE115387)/Homer                    | 1e-93 | -2.160e+02 | 0.0000 | 10372.0 | 16.29% | 8371.5  | 13.43% | <a href="#">motif file (matrix)</a> | <a href="#">svg</a> |
| 38 |    | Pknox1(Homeobox)/ES-Prep1-ChIP-Seq(GSE63282)/Homer                 | 1e-85 | -1.976e+02 | 0.0000 | 7296.0  | 11.46% | 5692.8  | 9.13%  | <a href="#">motif file (matrix)</a> | <a href="#">svg</a> |
| 39 |    | TCFL2(HMG)/K562-TCF7L2-ChIP-Seq(GSE29196)/Homer                    | 1e-82 | -1.894e+02 | 0.0000 | 2664.0  | 4.18%  | 1764.6  | 2.83%  | <a href="#">motif file (matrix)</a> | <a href="#">svg</a> |
| 40 |    | E2F(E2F)/Hela-CellCycle-Expression/Homer                           | 1e-81 | -1.883e+02 | 0.0000 | 1929.0  | 3.03%  | 1185.8  | 1.90%  | <a href="#">motif file (matrix)</a> | <a href="#">svg</a> |
| 41 |    | E2F6(E2F)/Hela-E2F6-ChIP-Seq(GSE31477)/Homer                       | 1e-79 | -1.840e+02 | 0.0000 | 14086.0 | 22.13% | 11912.0 | 19.11% | <a href="#">motif file (matrix)</a> | <a href="#">svg</a> |
| 42 |    | LEF1(HMG)/H1-LEF1-ChIP-Seq(GSE64758)/Homer                         | 1e-72 | -1.672e+02 | 0.0000 | 15236.0 | 23.93% | 13069.2 | 20.97% | <a href="#">motif file (matrix)</a> | <a href="#">svg</a> |
| 43 |    | NRF1(NRF)/MCF7-NRF1-ChIP-Seq(Unpublished)/Homer                    | 1e-70 | -1.625e+02 | 0.0000 | 5247.0  | 8.24%  | 4013.4  | 6.44%  | <a href="#">motif file (matrix)</a> | <a href="#">svg</a> |
| 44 |    | Tcfcp2l1(CP2)/mES-Tcfcp2l1-ChIP-Seq(GSE11431)/Homer                | 1e-67 | -1.543e+02 | 0.0000 | 5066.0  | 7.96%  | 3882.1  | 6.23%  | <a href="#">motif file (matrix)</a> | <a href="#">svg</a> |
| 45 |    | Egr2(Zf)/Thymocytes-Egr2-ChIP-Seq(GSE34254)/Homer                  | 1e-64 | -1.494e+02 | 0.0000 | 6455.0  | 10.14% | 5123.3  | 8.22%  | <a href="#">motif file (matrix)</a> | <a href="#">svg</a> |
| 46 |   | HINFP(Zf)/K562-HINFP.eGFP-ChIP-Seq(Encode)/Homer                   | 1e-61 | -1.407e+02 | 0.0000 | 8817.0  | 13.85% | 7286.0  | 11.69% | <a href="#">motif file (matrix)</a> | <a href="#">svg</a> |
| 47 |  | Ronin(THAP)/ES-Thap11-ChIP-Seq(GSE51522)/Homer                     | 1e-55 | -1.276e+02 | 0.0000 | 1208.0  | 1.90%  | 727.0   | 1.17%  | <a href="#">motif file (matrix)</a> | <a href="#">svg</a> |
| 48 |  | Zfp809(Zf)/ES-Zfp809-ChIP-Seq(GSE70799)/Homer                      | 1e-53 | -1.226e+02 | 0.0000 | 6726.0  | 10.57% | 5475.8  | 8.79%  | <a href="#">motif file (matrix)</a> | <a href="#">svg</a> |
| 49 |  | CTCF-SatelliteElement(Zf?)/CD4+-CTCF-ChIP-Seq(Barski_et_al.)/Homer | 1e-45 | -1.058e+02 | 0.0000 | 726.0   | 1.14%  | 398.3   | 0.64%  | <a href="#">motif file (matrix)</a> | <a href="#">svg</a> |
| 50 |  | Tcf7(HMG)/GM12878-TCF7-ChIP-Seq(Encode)/Homer                      | 1e-45 | -1.055e+02 | 0.0000 | 7992.0  | 12.55% | 6706.8  | 10.76% | <a href="#">motif file (matrix)</a> | <a href="#">svg</a> |
| 51 |  | NFkB-p50,p52(RHD)/Monocyte-p50-ChIP-Chip(Schreiber_et_al.)/Homer   | 1e-44 | -1.021e+02 | 0.0000 | 3428.0  | 5.39%  | 2630.4  | 4.22%  | <a href="#">motif file (matrix)</a> | <a href="#">svg</a> |
| 52 |  | EKLF(Zf)/Erythrocyte-Klf1-ChIP-Seq(GSE20478)/Homer                 | 1e-43 | -1.006e+02 | 0.0000 | 6792.0  | 10.67% | 5637.5  | 9.05%  | <a href="#">motif file (matrix)</a> | <a href="#">svg</a> |
| 53 |  | WT1(Zf)/Kidney-WT1-ChIP-Seq(GSE90016)/Homer                        | 1e-42 | -9.748e+01 | 0.0000 | 17764.0 | 27.91% | 15901.5 | 25.51% | <a href="#">motif file (matrix)</a> | <a href="#">svg</a> |

|    |  |                                                            |       |            |        |         |        |         |        |                                     |                     |
|----|--|------------------------------------------------------------|-------|------------|--------|---------|--------|---------|--------|-------------------------------------|---------------------|
| 54 |  | HIF2a(bHLH)/785_O-HIF2a-ChIP-Seq(GSE34871)/Homer           | 1e-36 | -8.498e+01 | 0.0000 | 8450.0  | 13.27% | 7242.2  | 11.62% | <a href="#">motif file (matrix)</a> | <a href="#">svg</a> |
| 55 |  | ZBTB33(Zf)/GM12878-ZBTB33-ChIP-Seq(GSE32465)/Homer         | 1e-36 | -8.343e+01 | 0.0000 | 1411.0  | 2.22%  | 970.5   | 1.56%  | <a href="#">motif file (matrix)</a> | <a href="#">svg</a> |
| 56 |  | Rfx1(HTH)/NPC-H3K4me1-ChIP-Seq(GSE16256)/Homer             | 1e-29 | -6.830e+01 | 0.0000 | 5809.0  | 9.13%  | 4911.3  | 7.88%  | <a href="#">motif file (matrix)</a> | <a href="#">svg</a> |
| 57 |  | NF1(CTF)/LNCAP-NF1-ChIP-Seq(Unpublished)/Homer             | 1e-28 | -6.639e+01 | 0.0000 | 10438.0 | 16.40% | 9220.0  | 14.79% | <a href="#">motif file (matrix)</a> | <a href="#">svg</a> |
| 58 |  | c-Myc(bHLH)/LNCAP-cMyc-ChIP-Seq(Unpublished)/Homer         | 1e-28 | -6.638e+01 | 0.0000 | 11540.0 | 18.13% | 10256.5 | 16.46% | <a href="#">motif file (matrix)</a> | <a href="#">svg</a> |
| 59 |  | Tbx20(T-box)/Heart-Tbx20-ChIP-Seq(GSE29636)/Homer          | 1e-25 | -5.904e+01 | 0.0000 | 5917.0  | 9.29%  | 5065.1  | 8.13%  | <a href="#">motif file (matrix)</a> | <a href="#">svg</a> |
| 60 |  | NRF(NRF)/Promoter/Homer                                    | 1e-25 | -5.812e+01 | 0.0000 | 6054.0  | 9.51%  | 5198.0  | 8.34%  | <a href="#">motif file (matrix)</a> | <a href="#">svg</a> |
| 61 |  | GFY(?)/Promoter/Homer                                      | 1e-24 | -5.750e+01 | 0.0000 | 2029.0  | 3.19%  | 1567.8  | 2.52%  | <a href="#">motif file (matrix)</a> | <a href="#">svg</a> |
| 62 |  | NFkB-p65-Rel(RHD)/ThioMac-LPS-Expression(GSE23622)/Homer   | 1e-24 | -5.637e+01 | 0.0000 | 1450.0  | 2.28%  | 1073.0  | 1.72%  | <a href="#">motif file (matrix)</a> | <a href="#">svg</a> |
| 63 |  | Otx2(Homeobox)/EpiLC-Otx2-ChIP-Seq(GSE56098)/Homer         | 1e-24 | -5.581e+01 | 0.0000 | 17940.0 | 28.18% | 16440.1 | 26.38% | <a href="#">motif file (matrix)</a> | <a href="#">svg</a> |
| 64 |  | JunD(bZIP)/K562-JunD-ChIP-Seq/Homer                        | 1e-22 | -5.211e+01 | 0.0000 | 2249.0  | 3.53%  | 1780.5  | 2.86%  | <a href="#">motif file (matrix)</a> | <a href="#">svg</a> |
| 65 |  | DLX1(Homeobox)/BasalGanglia-Dlx1-ChIP-seq(GSE124936)/Homer | 1e-21 | -5.047e+01 | 0.0000 | 22522.0 | 35.38% | 20912.0 | 33.55% | <a href="#">motif file (matrix)</a> | <a href="#">svg</a> |
| 66 |  | IRF4(IRF)/GM12878-IRF4-ChIP-Seq(GSE32465)/Homer            | 1e-21 | -4.868e+01 | 0.0000 | 8994.0  | 14.13% | 8006.5  | 12.85% | <a href="#">motif file (matrix)</a> | <a href="#">svg</a> |
| 67 |  | Zic2(Zf)/ESC-Zic2-ChIP-Seq(SRP197560)/Homer                | 1e-20 | -4.748e+01 | 0.0000 | 13381.0 | 21.02% | 12170.3 | 19.53% | <a href="#">motif file (matrix)</a> | <a href="#">svg</a> |
| 68 |  | CRE(bZIP)/Promoter/Homer                                   | 1e-20 | -4.738e+01 | 0.0000 | 5670.0  | 8.91%  | 4913.4  | 7.88%  | <a href="#">motif file (matrix)</a> | <a href="#">svg</a> |
| 69 |  | ZNF519(Zf)/HEK293-ZNF519.GFP-ChIP-Seq(GSE58341)/Homer      | 1e-19 | -4.549e+01 | 0.0000 | 6918.0  | 10.87% | 6087.6  | 9.77%  | <a href="#">motif file (matrix)</a> | <a href="#">svg</a> |
| 70 |  | KLF6(Zf)/PDAC-KLF6-ChIP-Seq(GSE64557)/Homer                | 1e-19 | -4.472e+01 | 0.0000 | 27988.0 | 43.97% | 26287.0 | 42.18% | <a href="#">motif file (matrix)</a> | <a href="#">svg</a> |
| 71 |  | Zic3(Zf)/mES-Zic3-ChIP-Seq(GSE37889)/Homer                 | 1e-19 | -4.435e+01 | 0.0000 | 16489.0 | 25.90% | 15174.2 | 24.35% | <a href="#">motif file (matrix)</a> | <a href="#">svg</a> |
| 72 |  | HIF-1a(bHLH)/MCF7-HIF1a-ChIP-Seq(GSE28352)/Homer           | 1e-18 | -4.371e+01 | 0.0000 | 6004.0  | 9.43%  | 5249.3  | 8.42%  | <a href="#">motif file (matrix)</a> | <a href="#">svg</a> |



|    |  |                                                            |       |            |        |         |        |         |        |                                     |                     |
|----|--|------------------------------------------------------------|-------|------------|--------|---------|--------|---------|--------|-------------------------------------|---------------------|
| 73 |  | Elk4(ETS)/Hela-Elk4-ChIP-Seq(GSE31477)/Homer               | 1e-18 | -4.227e+01 | 0.0000 | 14897.0 | 23.40% | 13673.5 | 21.94% | <a href="#">motif file (matrix)</a> | <a href="#">svg</a> |
| 74 |  | E-box(bHLH)/Promoter/Homer                                 | 1e-16 | -3.779e+01 | 0.0000 | 2166.0  | 3.40%  | 1769.0  | 2.84%  | <a href="#">motif file (matrix)</a> | <a href="#">svg</a> |
| 75 |  | bHLHE40(bHLH)/HepG2-BHLHE40-ChIP-Seq(GSE31477)/Homer       | 1e-14 | -3.227e+01 | 0.0000 | 7493.0  | 11.77% | 6741.9  | 10.82% | <a href="#">motif file (matrix)</a> | <a href="#">svg</a> |
| 76 |  | Arnt:Ahr(bHLH)/MCF7-Arnt-ChIP-Seq(Lo_et_al)/Homer          | 1e-13 | -3.056e+01 | 0.0000 | 15799.0 | 24.82% | 14684.1 | 23.56% | <a href="#">motif file (matrix)</a> | <a href="#">svg</a> |
| 77 |  | EBF(EBF)/proBcell-EBF-ChIP-Seq(GSE21978)/Homer             | 1e-12 | -2.796e+01 | 0.0000 | 5954.0  | 9.35%  | 5333.2  | 8.56%  | <a href="#">motif file (matrix)</a> | <a href="#">svg</a> |
| 78 |  | TFE3(bHLH)/MEF-TFE3-ChIP-Seq(GSE75757)/Homer               | 1e-10 | -2.486e+01 | 0.0000 | 2091.0  | 3.28%  | 1768.2  | 2.84%  | <a href="#">motif file (matrix)</a> | <a href="#">svg</a> |
| 79 |  | Tlx?(NR)/NPC-H3K4me1-ChIP-Seq(GSE16256)/Homer              | 1e-10 | -2.456e+01 | 0.0000 | 11581.0 | 18.19% | 10719.5 | 17.20% | <a href="#">motif file (matrix)</a> | <a href="#">svg</a> |
| 80 |  | Lhx2(Homeobox)/HFSC-Lhx2-ChIP-Seq(GSE48068)/Homer          | 1e-10 | -2.404e+01 | 0.0000 | 18178.0 | 28.56% | 17076.0 | 27.40% | <a href="#">motif file (matrix)</a> | <a href="#">svg</a> |
| 81 |  | ZNF692(Zf)/HEK293-ZNF692.GFP-ChIP-Seq(GSE58341)/Homer      | 1e-10 | -2.322e+01 | 0.0000 | 3856.0  | 6.06%  | 3410.5  | 5.47%  | <a href="#">motif file (matrix)</a> | <a href="#">svg</a> |
| 82 |  | DLX2(Homeobox)/BasalGanglia-Dlx2-ChIP-seq(GSE124936)/Homer | 1e-9  | -2.224e+01 | 0.0000 | 24562.0 | 38.58% | 23300.7 | 37.39% | <a href="#">motif file (matrix)</a> | <a href="#">svg</a> |
| 83 |  | Jun-AP1(bZIP)/K562-cJun-ChIP-Seq(GSE31477)/Homer           | 1e-9  | -2.172e+01 | 0.0000 | 4885.0  | 7.67%  | 4388.9  | 7.04%  | <a href="#">motif file (matrix)</a> | <a href="#">svg</a> |
| 84 |  | ZSCAN22(Zf)/HEK293-ZSCAN22.GFP-ChIP-Seq(GSE58341)/Homer    | 1e-8  | -2.062e+01 | 0.0000 | 2371.0  | 3.72%  | 2052.6  | 3.29%  | <a href="#">motif file (matrix)</a> | <a href="#">svg</a> |
| 85 |  | NFkB-p65(RHD)/GM12787-p65-ChIP-Seq(GSE19485)/Homer         | 1e-8  | -1.900e+01 | 0.0000 | 11319.0 | 17.78% | 10549.1 | 16.93% | <a href="#">motif file (matrix)</a> | <a href="#">svg</a> |
| 86 |  | GFX(?)/Promoter/Homer                                      | 1e-7  | -1.721e+01 | 0.0000 | 421.0   | 0.66%  | 313.3   | 0.50%  | <a href="#">motif file (matrix)</a> | <a href="#">svg</a> |
| 87 |  | ETS(ETS)/Promoter/Homer                                    | 1e-7  | -1.690e+01 | 0.0000 | 8956.0  | 14.07% | 8316.9  | 13.34% | <a href="#">motif file (matrix)</a> | <a href="#">svg</a> |
| 88 |  | ZNF165(Zf)/WHIM12-ZNF165-ChIP-Seq(GSE65937)/Homer          | 1e-6  | -1.456e+01 | 0.0000 | 3944.0  | 6.20%  | 3576.7  | 5.74%  | <a href="#">motif file (matrix)</a> | <a href="#">svg</a> |
| 89 |  | Egr1(Zf)/K562-Egr1-ChIP-Seq(GSE32465)/Homer                | 1e-5  | -1.291e+01 | 0.0000 | 19011.0 | 29.86% | 18099.9 | 29.04% | <a href="#">motif file (matrix)</a> | <a href="#">svg</a> |
| 90 |  | Foxa3(Forkhead)/Liver-Foxa3-ChIP-Seq(GSE77670)/Homer       | 1e-5  | -1.224e+01 | 0.0000 | 6335.0  | 9.95%  | 5880.2  | 9.43%  | <a href="#">motif file (matrix)</a> | <a href="#">svg</a> |
| 91 |  | CHR(?)/Hela-CellCycle-Expression/Homer                     | 1e-5  | -1.201e+01 | 0.0000 | 10691.0 | 16.79% | 10067.7 | 16.15% | <a href="#">motif file (matrix)</a> | <a href="#">svg</a> |

|     |                                                                                    |                                                                       |      |            |        |         |        |         |        |                                     |                     |
|-----|------------------------------------------------------------------------------------|-----------------------------------------------------------------------|------|------------|--------|---------|--------|---------|--------|-------------------------------------|---------------------|
| 92  |    | FosI2(bZIP)/3T3L1-FosI2-ChIP-Seq(GSE56872)/Homer                      | 1e-4 | -1.054e+01 | 0.0001 | 6557.0  | 10.30% | 6120.1  | 9.82%  | <a href="#">motif file (matrix)</a> | <a href="#">svg</a> |
| 93  |   | ELF1(ETS)/Jurkat-ELF1-ChIP-Seq(SRA014231)/Homer                       | 1e-4 | -1.017e+01 | 0.0002 | 13674.0 | 21.48% | 12989.5 | 20.84% | <a href="#">motif file (matrix)</a> | <a href="#">svg</a> |
| 94  |   | Elk1(ETS)/Hela-Elk1-ChIP-Seq(GSE31477)/Homer                          | 1e-4 | -1.014e+01 | 0.0002 | 14529.0 | 22.82% | 13818.9 | 22.17% | <a href="#">motif file (matrix)</a> | <a href="#">svg</a> |
| 95  |   | Tbox:Smad(T-box,MAD)/ESCD5-Smad2_3-ChIP-Seq(GSE29422)/Homer           | 1e-4 | -1.009e+01 | 0.0002 | 4905.0  | 7.71%  | 4547.6  | 7.30%  | <a href="#">motif file (matrix)</a> | <a href="#">svg</a> |
| 96  |   | Sox7(HMG)/ESC-Sox7-ChIP-Seq(GSE133899)/Homer                          | 1e-4 | -9.775e+00 | 0.0003 | 6226.0  | 9.78%  | 5816.3  | 9.33%  | <a href="#">motif file (matrix)</a> | <a href="#">svg</a> |
| 97  |   | Fra1(bZIP)/BT549-Fra1-ChIP-Seq(GSE46166)/Homer                        | 1e-3 | -8.672e+00 | 0.0008 | 9978.0  | 15.67% | 9450.2  | 15.16% | <a href="#">motif file (matrix)</a> | <a href="#">svg</a> |
| 98  |   | GLI3(Zf)/Limb-GLI3-ChIP-Seq(GSE11077)/Homer                           | 1e-2 | -6.523e+00 | 0.0066 | 3374.0  | 5.30%  | 3141.0  | 5.04%  | <a href="#">motif file (matrix)</a> | <a href="#">svg</a> |
| 99  |   | Sox2(HMG)/mES-Sox2-ChIP-Seq(GSE11431)/Homer                           | 1e-2 | -6.351e+00 | 0.0077 | 17472.0 | 27.45% | 16785.1 | 26.93% | <a href="#">motif file (matrix)</a> | <a href="#">svg</a> |
| 100 |   | Pax7(Paired,Homeobox),long/Myoblast-Pax7-ChIP-Seq(GSE25064)/Homer     | 1e-2 | -5.901e+00 | 0.0120 | 351.0   | 0.55%  | 295.5   | 0.47%  | <a href="#">motif file (matrix)</a> | <a href="#">svg</a> |
| 101 |   | PAX5(Paired,Homeobox),condensed/GM12878-PAX5-ChIP-Seq(GSE32465)/Homer | 1e-2 | -5.644e+00 | 0.0154 | 2705.0  | 4.25%  | 2516.1  | 4.04%  | <a href="#">motif file (matrix)</a> | <a href="#">svg</a> |
| 102 |   | Unknown-ESC-element(?)/mES-Nanog-ChIP-Seq(GSE11724)/Homer             | 1e-2 | -5.327e+00 | 0.0209 | 15169.0 | 23.83% | 14580.1 | 23.39% | <a href="#">motif file (matrix)</a> | <a href="#">svg</a> |
| 103 |  | CREB5(bZIP)/LNCaP-CREB5.V5-ChIP-Seq(GSE137775)/Homer                  | 1e-2 | -4.783e+00 | 0.0356 | 6836.0  | 10.74% | 6511.8  | 10.45% | <a href="#">motif file (matrix)</a> | <a href="#">svg</a> |
