# Supplementary material for: AP-2α and AP-2β cooperatively function in the craniofacial surface ectoderm to regulate chromatin and gene expression dynamics during facial development
Source: eLife journal article supplement (doi:10.7554/elife.70511), 2022-03-25
Supplement: supp [file elife-70511-supp-v1.zip]

# Homer Known Motif Enrichment Results (/Users/vanottee/output/)

[Homer de novo Motif Results](#)
[Gene Ontology Enrichment Results](#)
[Known Motif Enrichment Results \(txt file\)](#)

Total Target Sequences = 3103, Total Background Sequences = 46084

| Rank | Motif | Name                                                     | P-value | log P-value | q-value (Benjamini) | # Target Sequences with Motif | % of Targets Sequences with Motif | # Background Sequences with Motif | % of Background Sequences with Motif | Motif File                          | SVG                 |
|------|-------|----------------------------------------------------------|---------|-------------|---------------------|-------------------------------|-----------------------------------|-----------------------------------|--------------------------------------|-------------------------------------|---------------------|
| 1    |       | AP-2alpha(AP2)/Hela-AP2alpha-ChIP-Seq(GSE31477)/Homer    | 1e-736  | -1.695e+03  | 0.0000              | 1916.0                        | 61.75%                            | 7212.1                            | 15.65%                               | <a href="#">motif file (matrix)</a> | <a href="#">svg</a> |
| 2    |       | AP-2gamma(AP2)/MCF7-TFAP2C-ChIP-Seq(GSE21234)/Homer      | 1e-724  | -1.667e+03  | 0.0000              | 2128.0                        | 68.58%                            | 9452.7                            | 20.52%                               | <a href="#">motif file (matrix)</a> | <a href="#">svg</a> |
| 3    |       | p63(p53)/Keratinocyte-p63-ChIP-Seq(GSE17611)/Homer       | 1e-152  | -3.509e+02  | 0.0000              | 724.0                         | 23.33%                            | 3644.6                            | 7.91%                                | <a href="#">motif file (matrix)</a> | <a href="#">svg</a> |
| 4    |       | p53(p53)/Saos-p53-ChIP-Seq(GSE15780)/Homer               | 1e-95   | -2.192e+02  | 0.0000              | 291.0                         | 9.38%                             | 978.2                             | 2.12%                                | <a href="#">motif file (matrix)</a> | <a href="#">svg</a> |
| 5    |       | p53(p53)/Saos-p53-ChIP-Seq/Homer                         | 1e-95   | -2.192e+02  | 0.0000              | 291.0                         | 9.38%                             | 978.2                             | 2.12%                                | <a href="#">motif file (matrix)</a> | <a href="#">svg</a> |
| 6    |       | p73(p53)/Trachea-p73-ChIP-Seq(PRJNA310161)/Homer         | 1e-79   | -1.830e+02  | 0.0000              | 179.0                         | 5.77%                             | 430.3                             | 0.93%                                | <a href="#">motif file (matrix)</a> | <a href="#">svg</a> |
| 7    |       | TEAD4(TEA)/Tropoblast-Tea4-ChIP-Seq(GSE37350)/Homer      | 1e-76   | -1.760e+02  | 0.0000              | 929.0                         | 29.94%                            | 7596.7                            | 16.49%                               | <a href="#">motif file (matrix)</a> | <a href="#">svg</a> |
| 8    |       | TEAD3(TEA)/HepG2-TEAD3-ChIP-Seq(Encode)/Homer            | 1e-76   | -1.756e+02  | 0.0000              | 1135.0                        | 36.58%                            | 10099.9                           | 21.92%                               | <a href="#">motif file (matrix)</a> | <a href="#">svg</a> |
| 9    |       | TEAD1(TEAD)/HepG2-TEAD1-ChIP-Seq(Encode)/Homer           | 1e-68   | -1.576e+02  | 0.0000              | 992.0                         | 31.97%                            | 8645.9                            | 18.76%                               | <a href="#">motif file (matrix)</a> | <a href="#">svg</a> |
| 10   |       | TEAD(TEA)/Fibroblast-PU.1-ChIP-Seq(Unpublished)/Homer    | 1e-48   | -1.127e+02  | 0.0000              | 706.0                         | 22.75%                            | 6004.4                            | 13.03%                               | <a href="#">motif file (matrix)</a> | <a href="#">svg</a> |
| 11   |       | Pbx3(Homeobox)/GM12878-PBX3-ChIP-Seq(GSE32465)/Homer     | 1e-44   | -1.019e+02  | 0.0000              | 351.0                         | 11.31%                            | 2290.1                            | 4.97%                                | <a href="#">motif file (matrix)</a> | <a href="#">svg</a> |
| 12   |       | EBF1(EBF)/Near-E2A-ChIP-Seq(GSE21512)/Homer              | 1e-42   | -9.815e+01  | 0.0000              | 981.0                         | 31.61%                            | 9683.0                            | 21.02%                               | <a href="#">motif file (matrix)</a> | <a href="#">svg</a> |
| 13   |       | TEAD2(TEA)/Py2T-Tea2-ChIP-Seq(GSE55709)/Homer            | 1e-42   | -9.774e+01  | 0.0000              | 583.0                         | 18.79%                            | 4836.1                            | 10.50%                               | <a href="#">motif file (matrix)</a> | <a href="#">svg</a> |
| 14   |       | Pknox1(Homeobox)/ES-Prep1-ChIP-Seq(GSE63282)/Homer       | 1e-35   | -8.195e+01  | 0.0000              | 312.0                         | 10.05%                            | 2130.7                            | 4.62%                                | <a href="#">motif file (matrix)</a> | <a href="#">svg</a> |
| 15   |       | Tgif1(Homeobox)/mES-Tgif1-ChIP-Seq(GSE55404)/Homer       | 1e-30   | -7.138e+01  | 0.0000              | 2061.0                        | 66.42%                            | 25868.3                           | 56.14%                               | <a href="#">motif file (matrix)</a> | <a href="#">svg</a> |
| 16   |       | Meis1(Homeobox)/MastCells-Meis1-ChIP-Seq(GSE48085)/Homer | 1e-26   | -6.089e+01  | 0.0000              | 1375.0                        | 44.31%                            | 16105.3                           | 34.95%                               | <a href="#">motif file (matrix)</a> | <a href="#">svg</a> |

|    |                                                                                     |                                                              |       |            |        |        |        |         |        |                                     |                     |
|----|-------------------------------------------------------------------------------------|--------------------------------------------------------------|-------|------------|--------|--------|--------|---------|--------|-------------------------------------|---------------------|
| 17 |     | Dlx3(Homeobox)/Keratinocytes-Dlx3-ChIP-Seq(GSE89884)/Homer   | 1e-26 | -6.070e+01 | 0.0000 | 585.0  | 18.85% | 5588.2  | 12.13% | <a href="#">motif file (matrix)</a> | <a href="#">svg</a> |
| 18 |    | DLX5(Homeobox)/BasalGanglia-Dlx5-ChIP-seq(GSE124936)/Homer   | 1e-25 | -5.937e+01 | 0.0000 | 662.0  | 21.33% | 6576.3  | 14.27% | <a href="#">motif file (matrix)</a> | <a href="#">svg</a> |
| 19 |    | EBF2(EBF)/BrownAdipose-EBF2-ChIP-Seq(GSE97114)/Homer         | 1e-25 | -5.920e+01 | 0.0000 | 816.0  | 26.30% | 8550.6  | 18.56% | <a href="#">motif file (matrix)</a> | <a href="#">svg</a> |
| 20 |    | GRHL2(CP2)/HBE-GRHL2-ChIP-Seq(GSE46194)/Homer                | 1e-25 | -5.803e+01 | 0.0000 | 414.0  | 13.34% | 3605.7  | 7.83%  | <a href="#">motif file (matrix)</a> | <a href="#">svg</a> |
| 21 |    | PBX1(Homeobox)/MCF7-PBX1-ChIP-Seq(GSE28007)/Homer            | 1e-20 | -4.726e+01 | 0.0000 | 135.0  | 4.35%  | 796.5   | 1.73%  | <a href="#">motif file (matrix)</a> | <a href="#">svg</a> |
| 22 |    | ZNF41(Zf)/HEK293-ZNF41.GFP-ChIP-Seq(GSE58341)/Homer          | 1e-16 | -3.861e+01 | 0.0000 | 54.0   | 1.74%  | 194.5   | 0.42%  | <a href="#">motif file (matrix)</a> | <a href="#">svg</a> |
| 23 |    | Tgif2(Homeobox)/mES-Tgif2-ChIP-Seq(GSE55404)/Homer           | 1e-15 | -3.496e+01 | 0.0000 | 2047.0 | 65.97% | 27169.6 | 58.97% | <a href="#">motif file (matrix)</a> | <a href="#">svg</a> |
| 24 |    | Lhx2(Homeobox)/HFSC-Lhx2-ChIP-Seq(GSE48068)/Homer            | 1e-13 | -3.200e+01 | 0.0000 | 825.0  | 26.59% | 9605.4  | 20.85% | <a href="#">motif file (matrix)</a> | <a href="#">svg</a> |
| 25 |    | HOXA2(Homeobox)/mES-Hoxa2-ChIP-Seq(Donaldson_et_al.)/Homer   | 1e-11 | -2.690e+01 | 0.0000 | 123.0  | 3.96%  | 916.0   | 1.99%  | <a href="#">motif file (matrix)</a> | <a href="#">svg</a> |
| 26 |    | PBX2(Homeobox)/K562-PBX2-ChIP-Seq(Encode)/Homer              | 1e-11 | -2.600e+01 | 0.0000 | 636.0  | 20.50% | 7308.0  | 15.86% | <a href="#">motif file (matrix)</a> | <a href="#">svg</a> |
| 27 |    | Tcf3(HMG)/mES-Tcf3-ChIP-Seq(GSE11724)/Homer                  | 1e-11 | -2.595e+01 | 0.0000 | 259.0  | 8.35%  | 2476.8  | 5.38%  | <a href="#">motif file (matrix)</a> | <a href="#">svg</a> |
| 28 |    | DLX1(Homeobox)/BasalGanglia-Dlx1-ChIP-seq(GSE124936)/Homer   | 1e-10 | -2.488e+01 | 0.0000 | 962.0  | 31.00% | 11829.6 | 25.67% | <a href="#">motif file (matrix)</a> | <a href="#">svg</a> |
| 29 |   | DLX2(Homeobox)/BasalGanglia-Dlx2-ChIP-seq(GSE124936)/Homer   | 1e-10 | -2.337e+01 | 0.0000 | 1062.0 | 34.22% | 13318.2 | 28.91% | <a href="#">motif file (matrix)</a> | <a href="#">svg</a> |
| 30 |  | HOXA1(Homeobox)/mES-Hoxa1-ChIP-Seq(SRP084292)/Homer          | 1e-9  | -2.265e+01 | 0.0000 | 231.0  | 7.44%  | 2223.1  | 4.82%  | <a href="#">motif file (matrix)</a> | <a href="#">svg</a> |
| 31 |  | Tbx20(T-box)/Heart-Tbx20-ChIP-Seq(GSE29636)/Homer            | 1e-8  | -2.028e+01 | 0.0000 | 217.0  | 6.99%  | 2116.8  | 4.59%  | <a href="#">motif file (matrix)</a> | <a href="#">svg</a> |
| 32 |  | Lhx1(Homeobox)/EmbryoCarcinoma-Lhx1-ChIP-Seq(GSE70957)/Homer | 1e-8  | -1.982e+01 | 0.0000 | 813.0  | 26.20% | 10024.7 | 21.76% | <a href="#">motif file (matrix)</a> | <a href="#">svg</a> |
| 33 |  | LEF1(HMG)/H1-LEF1-ChIP-Seq(GSE64758)/Homer                   | 1e-7  | -1.781e+01 | 0.0000 | 538.0  | 17.34% | 6360.1  | 13.80% | <a href="#">motif file (matrix)</a> | <a href="#">svg</a> |
| 34 |  | Hoxb4(Homeobox)/ES-Hoxb4-ChIP-Seq(GSE34014)/Homer            | 1e-7  | -1.630e+01 | 0.0000 | 170.0  | 5.48%  | 1654.6  | 3.59%  | <a href="#">motif file (matrix)</a> | <a href="#">svg</a> |
| 35 |  | En1(Homeobox)/SUM149-EN1-ChIP-Seq(GSE120957)/Homer           | 1e-6  | -1.483e+01 | 0.0000 | 1219.0 | 39.28% | 16122.3 | 34.99% | <a href="#">motif file (matrix)</a> | <a href="#">svg</a> |
| 36 |  | IRF1(IRF)/PBMC-IRF1-ChIP-Seq(GSE43036)/Homer                 | 1e-6  | -1.465e+01 | 0.0000 | 127.0  | 4.09%  | 1183.2  | 2.57%  | <a href="#">motif file (matrix)</a> | <a href="#">svg</a> |

|    |                                                                                     |                                                                  |      |            |        |        |        |         |        |                                     |                     |
|----|-------------------------------------------------------------------------------------|------------------------------------------------------------------|------|------------|--------|--------|--------|---------|--------|-------------------------------------|---------------------|
| 37 |     | LXH9(Homeobox)/Hct116-LXH9.V5-ChIP-Seq(GSE116822)/Homer          | 1e-5 | -1.362e+01 | 0.0000 | 977.0  | 31.49% | 12734.7 | 27.64% | <a href="#">motif file (matrix)</a> | <a href="#">svg</a> |
| 38 |    | Pdx1(Homeobox)/Islet-Pdx1-ChIP-Seq(SRA008281)/Homer              | 1e-5 | -1.329e+01 | 0.0000 | 645.0  | 20.79% | 8077.0  | 17.53% | <a href="#">motif file (matrix)</a> | <a href="#">svg</a> |
| 39 |    | TCFL2(HMG)/K562-TCF7L2-ChIP-Seq(GSE29196)/Homer                  | 1e-5 | -1.257e+01 | 0.0000 | 90.0   | 2.90%  | 800.2   | 1.74%  | <a href="#">motif file (matrix)</a> | <a href="#">svg</a> |
| 40 |    | Tcf7(HMG)/GM12878-TCF7-ChIP-Seq(Encode)/Homer                    | 1e-5 | -1.234e+01 | 0.0000 | 272.0  | 8.77%  | 3075.6  | 6.68%  | <a href="#">motif file (matrix)</a> | <a href="#">svg</a> |
| 41 |    | Lhx3(Homeobox)/Neuron-Lhx3-ChIP-Seq(GSE31456)/Homer              | 1e-5 | -1.152e+01 | 0.0001 | 1092.0 | 35.19% | 14552.9 | 31.58% | <a href="#">motif file (matrix)</a> | <a href="#">svg</a> |
| 42 |    | Atf4(bZIP)/MEF-Atf4-ChIP-Seq(GSE35681)/Homer                     | 1e-4 | -1.049e+01 | 0.0003 | 182.0  | 5.87%  | 1986.0  | 4.31%  | <a href="#">motif file (matrix)</a> | <a href="#">svg</a> |
| 43 |    | Egr2(Zf)/Thymocytes-Egr2-ChIP-Seq(GSE34254)/Homer                | 1e-4 | -1.045e+01 | 0.0003 | 138.0  | 4.45%  | 1431.4  | 3.11%  | <a href="#">motif file (matrix)</a> | <a href="#">svg</a> |
| 44 |    | Arnt(Ahr(bHLH)/MCF7-Arnt-ChIP-Seq(Lo_et_al.)/Homer               | 1e-4 | -1.018e+01 | 0.0004 | 438.0  | 14.12% | 5415.2  | 11.75% | <a href="#">motif file (matrix)</a> | <a href="#">svg</a> |
| 45 |    | Hoxc9(Homeobox)/Ain15-Hoxc9-ChIP-Seq(GSE21812)/Homer             | 1e-4 | -1.017e+01 | 0.0004 | 357.0  | 11.50% | 4312.2  | 9.36%  | <a href="#">motif file (matrix)</a> | <a href="#">svg</a> |
| 46 |    | E2F4(E2F)/K562-E2F4-ChIP-Seq(GSE31477)/Homer                     | 1e-4 | -9.785e+00 | 0.0005 | 227.0  | 7.32%  | 2597.1  | 5.64%  | <a href="#">motif file (matrix)</a> | <a href="#">svg</a> |
| 47 |    | Tcf21(CP2)/mES-Tcf21-ChIP-Seq(GSE11431)/Homer                    | 1e-4 | -9.619e+00 | 0.0006 | 134.0  | 4.32%  | 1408.8  | 3.06%  | <a href="#">motif file (matrix)</a> | <a href="#">svg</a> |
| 48 |    | p53(p53)/mES-cMyc-ChIP-Seq(GSE11431)/Homer                       | 1e-3 | -9.191e+00 | 0.0009 | 26.0   | 0.84%  | 166.7   | 0.36%  | <a href="#">motif file (matrix)</a> | <a href="#">svg</a> |
| 49 |   | NFATC1(RHD,bZIP)/Jurkat-NFATC1-ChIP-Seq(Jolma_et_al.)/Homer      | 1e-3 | -8.378e+00 | 0.0021 | 120.0  | 3.87%  | 1274.7  | 2.77%  | <a href="#">motif file (matrix)</a> | <a href="#">svg</a> |
| 50 |  | Chop(bZIP)/MEF-Chop-ChIP-Seq(GSE35681)/Homer                     | 1e-3 | -8.112e+00 | 0.0026 | 138.0  | 4.45%  | 1512.7  | 3.28%  | <a href="#">motif file (matrix)</a> | <a href="#">svg</a> |
| 51 |  | HIF2a(bHLH)/785_O-HIF2a-ChIP-Seq(GSE34871)/Homer                 | 1e-3 | -7.952e+00 | 0.0030 | 219.0  | 7.06%  | 2578.3  | 5.60%  | <a href="#">motif file (matrix)</a> | <a href="#">svg</a> |
| 52 |  | ZFX(Zf)/mES-Zfx-ChIP-Seq(GSE11431)/Homer                         | 1e-3 | -7.890e+00 | 0.0032 | 910.0  | 29.33% | 12261.9 | 26.61% | <a href="#">motif file (matrix)</a> | <a href="#">svg</a> |
| 53 |  | Brachyury(T-box)/Mesoendoderm-Brachyury-ChIP-exo(GSE54963)/Homer | 1e-3 | -7.334e+00 | 0.0054 | 211.0  | 6.80%  | 2503.0  | 5.43%  | <a href="#">motif file (matrix)</a> | <a href="#">svg</a> |
| 54 |  | MafA(bZIP)/Islet-MafA-ChIP-Seq(GSE30298)/Homer                   | 1e-3 | -7.177e+00 | 0.0062 | 632.0  | 20.37% | 8353.3  | 18.13% | <a href="#">motif file (matrix)</a> | <a href="#">svg</a> |
| 55 |  | NFkB-p65-Rel(RHD)/ThioMac-LPS-Expression(GSE23622)/Homer         | 1e-3 | -6.926e+00 | 0.0078 | 49.0   | 1.58%  | 449.7   | 0.98%  | <a href="#">motif file (matrix)</a> | <a href="#">svg</a> |
| 56 |  | Six1(Homeobox)/Myoblast-Six1-ChIP-Chip(GSE20150)/Homer           | 1e-2 | -6.269e+00 | 0.0148 | 178.0  | 5.74%  | 2118.7  | 4.60%  | <a href="#">motif file (matrix)</a> | <a href="#">svg</a> |

|    |                                                                                   |                                                                |      |            |        |       |        |        |        |                                     |                     |
|----|-----------------------------------------------------------------------------------|----------------------------------------------------------------|------|------------|--------|-------|--------|--------|--------|-------------------------------------|---------------------|
| 57 |   | IRF2(IRF)/Erythroblasts-IRF2-ChIP-Seq(GSE36985)/Homer          | 1e-2 | -6.097e+00 | 0.0173 | 81.0  | 2.61%  | 861.9  | 1.87%  | <a href="#">motif file (matrix)</a> | <a href="#">svg</a> |
| 58 |  | Six2(Homeobox)/NephronProgenitor-Six2-ChIP-Seq(GSE39837)/Homer | 1e-2 | -5.732e+00 | 0.0245 | 649.0 | 20.92% | 8737.6 | 18.96% | <a href="#">motif file (matrix)</a> | <a href="#">svg</a> |
| 59 |  | CEBP:AP1(bZIP)/ThioMac-CEBPb-ChIP-Seq(GSE21512)/Homer          | 1e-2 | -5.606e+00 | 0.0273 | 465.0 | 14.99% | 6133.1 | 13.31% | <a href="#">motif file (matrix)</a> | <a href="#">svg</a> |
| 60 |  | GATA(Zf),IR3/iTreg-Gata3-ChIP-Seq(GSE20898)/Homer              | 1e-2 | -5.571e+00 | 0.0278 | 106.0 | 3.42%  | 1201.9 | 2.61%  | <a href="#">motif file (matrix)</a> | <a href="#">svg</a> |
| 61 |  | E2F3(E2F)/MEF-E2F3-ChIP-Seq(GSE71376)/Homer                    | 1e-2 | -5.107e+00 | 0.0435 | 324.0 | 10.44% | 4196.3 | 9.11%  | <a href="#">motif file (matrix)</a> | <a href="#">svg</a> |
| 62 |  | ISRE(IRF)/ThioMac-LPS-Expression(GSE23622)/Homer               | 1e-2 | -5.098e+00 | 0.0435 | 51.0  | 1.64%  | 519.4  | 1.13%  | <a href="#">motif file (matrix)</a> | <a href="#">svg</a> |
