# Supplementary material for: AP-2α and AP-2β cooperatively function in the craniofacial surface ectoderm to regulate chromatin and gene expression dynamics during facial development
Source: eLife journal article supplement (doi:10.7554/elife.70511), 2022-03-25
Supplement: supp [file elife-70511-supp-v1.zip]

# Homer Known Motif Enrichment Results (/Users/vanottee/output3/)

[Homer de novo Motif Results](#)
[Gene Ontology Enrichment Results](#)
[Known Motif Enrichment Results \(txt file\)](#)

Total Target Sequences = 20888, Total Background Sequences = 28802

| Rank | Motif                                                                               | Name                                                    | P-value | log P-value | q-value (Benjamini) | # Target Sequences with Motif | % of Targets Sequences with Motif | # Background Sequences with Motif | % of Background Sequences with Motif | Motif File                          | SVG                 |
|------|-------------------------------------------------------------------------------------|---------------------------------------------------------|---------|-------------|---------------------|-------------------------------|-----------------------------------|-----------------------------------|--------------------------------------|-------------------------------------|---------------------|
| 1    |    | p73(p53)/Trachea-p73-ChIP-Seq(PRJNA310161)/Homer        | 1e-1476 | -3.400e+03  | 0.0000              | 2446.0                        | 11.71%                            | 362.9                             | 1.26%                                | <a href="#">motif file (matrix)</a> | <a href="#">svg</a> |
| 2    |    | p53(p53)/Saos-p53-ChIP-Seq(GSE15780)/Homer              | 1e-1391 | -3.205e+03  | 0.0000              | 3368.0                        | 16.13%                            | 839.3                             | 2.91%                                | <a href="#">motif file (matrix)</a> | <a href="#">svg</a> |
| 3    |    | p53(p53)/Saos-p53-ChIP-Seq/Homer                        | 1e-1391 | -3.205e+03  | 0.0000              | 3368.0                        | 16.13%                            | 839.3                             | 2.91%                                | <a href="#">motif file (matrix)</a> | <a href="#">svg</a> |
| 4    |    | p63(p53)/Keratinocyte-p63-ChIP-Seq(GSE17611)/Homer      | 1e-1360 | -3.132e+03  | 0.0000              | 6340.0                        | 30.36%                            | 2994.7                            | 10.40%                               | <a href="#">motif file (matrix)</a> | <a href="#">svg</a> |
| 5    |    | AP-2alpha(AP2)/Hela-AP2alpha-ChIP-Seq(GSE31477)/Homer   | 1e-627  | -1.446e+03  | 0.0000              | 7058.0                        | 33.79%                            | 5243.9                            | 18.21%                               | <a href="#">motif file (matrix)</a> | <a href="#">svg</a> |
| 6    |    | TEAD1(TEAD)/HepG2-TEAD1-ChIP-Seq(Encode)/Homer          | 1e-554  | -1.277e+03  | 0.0000              | 8274.0                        | 39.62%                            | 6869.0                            | 23.85%                               | <a href="#">motif file (matrix)</a> | <a href="#">svg</a> |
| 7    |    | AP-2gamma(AP2)/MCF7-TFAP2C-ChIP-Seq(GSE21234)/Homer     | 1e-533  | -1.229e+03  | 0.0000              | 8226.0                        | 39.39%                            | 6889.9                            | 23.93%                               | <a href="#">motif file (matrix)</a> | <a href="#">svg</a> |
| 8    |   | TEAD4(TEA)/Tropoblast-Tead4-ChIP-Seq(GSE37350)/Homer    | 1e-509  | -1.173e+03  | 0.0000              | 7561.0                        | 36.20%                            | 6204.9                            | 21.55%                               | <a href="#">motif file (matrix)</a> | <a href="#">svg</a> |
| 9    |  | TEAD(TEA)/Fibroblast-PU.1-ChIP-Seq(Unpublished)/Homer   | 1e-502  | -1.156e+03  | 0.0000              | 6291.0                        | 30.12%                            | 4801.1                            | 16.67%                               | <a href="#">motif file (matrix)</a> | <a href="#">svg</a> |
| 10   |  | TEAD3(TEA)/HepG2-TEAD3-ChIP-Seq(Encode)/Homer           | 1e-482  | -1.111e+03  | 0.0000              | 9003.0                        | 43.11%                            | 8026.1                            | 27.87%                               | <a href="#">motif file (matrix)</a> | <a href="#">svg</a> |
| 11   |  | TEAD2(TEA)/Py2T-Tead2-ChIP-Seq(GSE55709)/Homer          | 1e-412  | -9.498e+02  | 0.0000              | 5240.0                        | 25.09%                            | 3960.6                            | 13.75%                               | <a href="#">motif file (matrix)</a> | <a href="#">svg</a> |
| 12   |  | GRHL2(CP2)/HBE-GRHL2-ChIP-Seq(GSE46194)/Homer           | 1e-355  | -8.175e+02  | 0.0000              | 4114.0                        | 19.70%                            | 2963.8                            | 10.29%                               | <a href="#">motif file (matrix)</a> | <a href="#">svg</a> |
| 13   |  | p53(p53)/mES-cMyc-ChIP-Seq(GSE11431)/Homer              | 1e-229  | -5.286e+02  | 0.0000              | 559.0                         | 2.68%                             | 133.7                             | 0.46%                                | <a href="#">motif file (matrix)</a> | <a href="#">svg</a> |
| 14   |  | Pbx3(Homeobox)/GM12878-PBX3-ChIP-Seq(GSE32465)/Homer    | 1e-109  | -2.519e+02  | 0.0000              | 2306.0                        | 11.04%                            | 1967.3                            | 6.83%                                | <a href="#">motif file (matrix)</a> | <a href="#">svg</a> |
| 15   |  | Six 1(Homeobox)/Myoblast-Six 1-ChIP-Seq(GSE20150)/Homer | 1e-108  | -2.489e+02  | 0.0000              | 2129.0                        | 10.19%                            | 1780.1                            | 6.18%                                | <a href="#">motif file (matrix)</a> | <a href="#">svg</a> |

|    |  |                                                                |       |            |        |         |        |         |        |                                     |                     |
|----|--|----------------------------------------------------------------|-------|------------|--------|---------|--------|---------|--------|-------------------------------------|---------------------|
| 16 |  | Tcf3(HMG)/mES-Tcf3-ChIP-Seq(GSE11724)/Homer                    | 1e-90 | -2.075e+02 | 0.0000 | 2327.0  | 11.14% | 2089.2  | 7.26%  | <a href="#">motif file (matrix)</a> | <a href="#">svg</a> |
| 17 |  | Pknox1(Homeobox)/ES-Prep1-ChIP-Seq(GSE63282)/Homer             | 1e-88 | -2.036e+02 | 0.0000 | 2117.0  | 10.14% | 1863.6  | 6.47%  | <a href="#">motif file (matrix)</a> | <a href="#">svg</a> |
| 18 |  | LEF1(HMG)/H1-LEF1-ChIP-Seq(GSE64758)/Homer                     | 1e-74 | -1.718e+02 | 0.0000 | 4900.0  | 23.46% | 5294.1  | 18.39% | <a href="#">motif file (matrix)</a> | <a href="#">svg</a> |
| 19 |  | Six4(Homeobox)/MCF7-SIX4-ChIP-Seq(Encode)/Homer                | 1e-73 | -1.684e+02 | 0.0000 | 568.0   | 2.72%  | 330.9   | 1.15%  | <a href="#">motif file (matrix)</a> | <a href="#">svg</a> |
| 20 |  | PBX1(Homeobox)/MCF7-PBX1-ChIP-Seq(GSE28007)/Homer              | 1e-72 | -1.665e+02 | 0.0000 | 963.0   | 4.61%  | 705.0   | 2.45%  | <a href="#">motif file (matrix)</a> | <a href="#">svg</a> |
| 21 |  | REST-NRSF(Zf)/Jurkat-NRSF-ChIP-Seq/Homer                       | 1e-70 | -1.627e+02 | 0.0000 | 185.0   | 0.89%  | 48.1    | 0.17%  | <a href="#">motif file (matrix)</a> | <a href="#">svg</a> |
| 22 |  | TCFL2(HMG)/K562-TCF7L2-ChIP-Seq(GSE29196)/Homer                | 1e-62 | -1.439e+02 | 0.0000 | 890.0   | 4.26%  | 667.1   | 2.32%  | <a href="#">motif file (matrix)</a> | <a href="#">svg</a> |
| 23 |  | E2F7(E2F)/Hela-E2F7-ChIP-Seq(GSE32673)/Homer                   | 1e-57 | -1.322e+02 | 0.0000 | 593.0   | 2.84%  | 393.0   | 1.36%  | <a href="#">motif file (matrix)</a> | <a href="#">svg</a> |
| 24 |  | Dlx3(Homeobox)/Kerainocytes-Dlx3-ChIP-Seq(GSE89884)/Homer      | 1e-53 | -1.236e+02 | 0.0000 | 4028.0  | 19.29% | 4405.4  | 15.30% | <a href="#">motif file (matrix)</a> | <a href="#">svg</a> |
| 25 |  | Tcfcp2l1(CP2)/mES-Tcfcp2l1-ChIP-Seq(GSE11431)/Homer            | 1e-53 | -1.231e+02 | 0.0000 | 1351.0  | 6.47%  | 1199.3  | 4.16%  | <a href="#">motif file (matrix)</a> | <a href="#">svg</a> |
| 26 |  | DLX5(Homeobox)/BasalGanglia-Dlx5-ChIP-seq(GSE124936)/Homer     | 1e-50 | -1.167e+02 | 0.0000 | 4669.0  | 22.35% | 5248.2  | 18.23% | <a href="#">motif file (matrix)</a> | <a href="#">svg</a> |
| 27 |  | Tcf7(HMG)/GM12878-TCF7-ChIP-Seq(Encode)/Homer                  | 1e-38 | -8.753e+01 | 0.0000 | 2540.0  | 12.16% | 2716.7  | 9.43%  | <a href="#">motif file (matrix)</a> | <a href="#">svg</a> |
| 28 |  | Tbx20(T-box)/Heart-Tbx20-ChIP-Seq(GSE29636)/Homer              | 1e-35 | -8.281e+01 | 0.0000 | 1712.0  | 8.20%  | 1732.3  | 6.02%  | <a href="#">motif file (matrix)</a> | <a href="#">svg</a> |
| 29 |  | Meis1(Homeobox)/MastCells-Meis1-ChIP-Seq(GSE48085)/Homer       | 1e-35 | -8.084e+01 | 0.0000 | 10259.0 | 49.12% | 12907.5 | 44.83% | <a href="#">motif file (matrix)</a> | <a href="#">svg</a> |
| 30 |  | Six2(Homeobox)/NephronProgenitor-Six2-ChIP-Seq(GSE39837)/Homer | 1e-26 | -6.084e+01 | 0.0000 | 5890.0  | 28.20% | 7182.0  | 24.94% | <a href="#">motif file (matrix)</a> | <a href="#">svg</a> |
| 31 |  | E2F3(E2F)/MEF-E2F3-ChIP-Seq(GSE71376)/Homer                    | 1e-22 | -5.279e+01 | 0.0000 | 2492.0  | 11.93% | 2827.9  | 9.82%  | <a href="#">motif file (matrix)</a> | <a href="#">svg</a> |
| 32 |  | Foxa3(Forkhead)/Liver-Foxa3-ChIP-Seq(GSE77670)/Homer           | 1e-19 | -4.376e+01 | 0.0000 | 2148.0  | 10.28% | 2445.0  | 8.49%  | <a href="#">motif file (matrix)</a> | <a href="#">svg</a> |
| 33 |  | E2F1(E2F)/Hela-E2F1-ChIP-Seq(GSE22478)/Homer                   | 1e-18 | -4.324e+01 | 0.0000 | 809.0   | 3.87%  | 804.2   | 2.79%  | <a href="#">motif file (matrix)</a> | <a href="#">svg</a> |
| 34 |  | IRF4(IRF)/GM12878-IRF4-ChIP-Seq(GSE32465)/Homer                | 1e-16 | -3.755e+01 | 0.0000 | 2654.0  | 12.71% | 3131.1  | 10.87% | <a href="#">motif file (matrix)</a> | <a href="#">svg</a> |

|    |  |                                                               |       |            |        |        |        |        |        |                                     |                     |
|----|--|---------------------------------------------------------------|-------|------------|--------|--------|--------|--------|--------|-------------------------------------|---------------------|
| 35 |  | Klf9(Zf)/GBM-Klf9-ChIP-Seq(GSE62211)/Homer                    | 1e-16 | -3.730e+01 | 0.0000 | 2401.0 | 11.50% | 2808.9 | 9.75%  | <a href="#">motif file (matrix)</a> | <a href="#">svg</a> |
| 36 |  | Nfkb-p65-Rel(RHD)/ThioMac-LPS-Expression(GSE23622)/Homer      | 1e-15 | -3.519e+01 | 0.0000 | 394.0  | 1.89%  | 353.1  | 1.23%  | <a href="#">motif file (matrix)</a> | <a href="#">svg</a> |
| 37 |  | E2F(E2F)/Hela-CellCycle-Expression/Homer                      | 1e-14 | -3.425e+01 | 0.0000 | 216.0  | 1.03%  | 165.9  | 0.58%  | <a href="#">motif file (matrix)</a> | <a href="#">svg</a> |
| 38 |  | Klf4(Zf)/mES-Klf4-ChIP-Seq(GSE11431)/Homer                    | 1e-14 | -3.402e+01 | 0.0000 | 2383.0 | 11.41% | 2808.6 | 9.75%  | <a href="#">motif file (matrix)</a> | <a href="#">svg</a> |
| 39 |  | E2F6(E2F)/Hela-E2F6-ChIP-Seq(GSE31477)/Homer                  | 1e-14 | -3.349e+01 | 0.0000 | 2027.0 | 9.71%  | 2356.5 | 8.18%  | <a href="#">motif file (matrix)</a> | <a href="#">svg</a> |
| 40 |  | Otx2(Homeobox)/EpiLC-Otx2-ChIP-Seq(GSE56098)/Homer            | 1e-13 | -3.158e+01 | 0.0000 | 5337.0 | 25.55% | 6713.4 | 23.31% | <a href="#">motif file (matrix)</a> | <a href="#">svg</a> |
| 41 |  | PBX2(Homeobox)/K562-PBX2-ChIP-Seq(Encode)/Homer               | 1e-13 | -3.053e+01 | 0.0000 | 4669.0 | 22.35% | 5834.9 | 20.26% | <a href="#">motif file (matrix)</a> | <a href="#">svg</a> |
| 42 |  | FOXK2(Forkhead)/U2OS-FOXK2-ChIP-Seq(EMTAB-2204)/Homer         | 1e-11 | -2.537e+01 | 0.0000 | 3677.0 | 17.61% | 4573.7 | 15.88% | <a href="#">motif file (matrix)</a> | <a href="#">svg</a> |
| 43 |  | KLF3(Zf)/MEF-Klf3-ChIP-Seq(GSE44748)/Homer                    | 1e-10 | -2.445e+01 | 0.0000 | 2752.0 | 13.18% | 3365.2 | 11.69% | <a href="#">motif file (matrix)</a> | <a href="#">svg</a> |
| 44 |  | Oct11(POU,Homeobox)/NCIH1048-POU2F3-ChIP-seq(GSE115123)/Homer | 1e-10 | -2.340e+01 | 0.0000 | 1797.0 | 8.60%  | 2134.8 | 7.41%  | <a href="#">motif file (matrix)</a> | <a href="#">svg</a> |
| 45 |  | Tbox:Smad(T-box,MAD)/EScd5-Smad2_3-ChIP-Seq(GSE29422)/Homer   | 1e-10 | -2.312e+01 | 0.0000 | 1333.0 | 6.38%  | 1543.7 | 5.36%  | <a href="#">motif file (matrix)</a> | <a href="#">svg</a> |
| 46 |  | Zfp281(Zf)/ES-Zfp281-ChIP-Seq(GSE81042)/Homer                 | 1e-8  | -2.062e+01 | 0.0000 | 1578.0 | 7.56%  | 1874.3 | 6.51%  | <a href="#">motif file (matrix)</a> | <a href="#">svg</a> |
| 47 |  | DLX1(Homeobox)/BasalGanglia-Dlx1-ChIP-seq(GSE124936)/Homer    | 1e-8  | -1.861e+01 | 0.0000 | 7045.0 | 33.73% | 9185.7 | 31.90% | <a href="#">motif file (matrix)</a> | <a href="#">svg</a> |
| 48 |  | HOXA2(Homeobox)/mES-Hoxa2-ChIP-Seq(Donaldson_et_al.)/Homer    | 1e-8  | -1.847e+01 | 0.0000 | 647.0  | 3.10%  | 711.9  | 2.47%  | <a href="#">motif file (matrix)</a> | <a href="#">svg</a> |
| 49 |  | E2F4(E2F)/K562-E2F4-ChIP-Seq(GSE31477)/Homer                  | 1e-7  | -1.778e+01 | 0.0000 | 1363.0 | 6.53%  | 1620.7 | 5.63%  | <a href="#">motif file (matrix)</a> | <a href="#">svg</a> |
| 50 |  | Lhx2(Homeobox)/HFSC-Lhx2-ChIP-Seq(GSE48068)/Homer             | 1e-7  | -1.762e+01 | 0.0000 | 5887.0 | 28.19% | 7631.9 | 26.50% | <a href="#">motif file (matrix)</a> | <a href="#">svg</a> |
| 51 |  | Foxa2(Forkhead)/Liver-Foxa2-ChIP-Seq(GSE25694)/Homer          | 1e-7  | -1.666e+01 | 0.0000 | 4705.0 | 22.53% | 6052.7 | 21.02% | <a href="#">motif file (matrix)</a> | <a href="#">svg</a> |
| 52 |  | Fox:Ebox(Forkhead,bHLH)/Panc1-Foxa2-ChIP-Seq(GSE47459)/Homer  | 1e-6  | -1.445e+01 | 0.0000 | 6314.0 | 30.23% | 8262.4 | 28.69% | <a href="#">motif file (matrix)</a> | <a href="#">svg</a> |
| 53 |  | Nfkb-p65(RHD)/GM12787-p65-ChIP-Seq(GSE19485)/Homer            | 1e-6  | -1.407e+01 | 0.0000 | 2683.0 | 12.85% | 3386.8 | 11.76% | <a href="#">motif file (matrix)</a> | <a href="#">svg</a> |

|    |  |                                                                          |      |            |        |        |        |         |        |                                     |                     |
|----|--|--------------------------------------------------------------------------|------|------------|--------|--------|--------|---------|--------|-------------------------------------|---------------------|
| 54 |  | Hoxb4(Homeobox)/ES-Hoxb4-ChIP-Seq(GSE34014)/Homer                        | 1e-6 | -1.401e+01 | 0.0000 | 1162.0 | 5.56%  | 1392.1  | 4.83%  | <a href="#">motif file (matrix)</a> | <a href="#">svg</a> |
| 55 |  | CHR(?)/Hela-CellCycle-Expression/Homer                                   | 1e-5 | -1.347e+01 | 0.0000 | 3319.0 | 15.89% | 4241.6  | 14.73% | <a href="#">motif file (matrix)</a> | <a href="#">svg</a> |
| 56 |  | Brn1(POU,Homeobox)/NPC-Brn1-ChIP-Seq(GSE35496)/Homer                     | 1e-5 | -1.321e+01 | 0.0000 | 1738.0 | 8.32%  | 2149.8  | 7.47%  | <a href="#">motif file (matrix)</a> | <a href="#">svg</a> |
| 57 |  | Foxo3(Forkhead)/U2OS-Foxo3-ChIP-Seq(E-MTAB-2701)/Homer                   | 1e-5 | -1.319e+01 | 0.0000 | 4150.0 | 19.87% | 5359.3  | 18.61% | <a href="#">motif file (matrix)</a> | <a href="#">svg</a> |
| 58 |  | Foxh1(Forkhead)/hESC-FOXH1-ChIP-Seq(GSE29422)/Homer                      | 1e-4 | -1.085e+01 | 0.0001 | 3375.0 | 16.16% | 4356.3  | 15.13% | <a href="#">motif file (matrix)</a> | <a href="#">svg</a> |
| 59 |  | FOXP1(Forkhead)/H9-FOXP1-ChIP-Seq(GSE31006)/Homer                        | 1e-4 | -1.061e+01 | 0.0002 | 2511.0 | 12.02% | 3204.4  | 11.13% | <a href="#">motif file (matrix)</a> | <a href="#">svg</a> |
| 60 |  | PAX5(Paired,Homeobox),condensed/GM12878-PAX5-ChIP-Seq(GSE32465)/Homer    | 1e-4 | -1.013e+01 | 0.0003 | 665.0  | 3.18%  | 785.4   | 2.73%  | <a href="#">motif file (matrix)</a> | <a href="#">svg</a> |
| 61 |  | HOXA1(Homeobox)/mES-Hoxa1-ChIP-Seq(SRP084292)/Homer                      | 1e-3 | -9.067e+00 | 0.0008 | 1455.0 | 6.97%  | 1824.6  | 6.34%  | <a href="#">motif file (matrix)</a> | <a href="#">svg</a> |
| 62 |  | DLX2(Homeobox)/BasalGanglia-Dlx2-ChIP-seq(GSE124936)/Homer               | 1e-3 | -8.361e+00 | 0.0017 | 7746.0 | 37.09% | 10343.7 | 35.92% | <a href="#">motif file (matrix)</a> | <a href="#">svg</a> |
| 63 |  | NFkB-p50,p52(RHD)/Monocyte-p50-ChIP-Chip(Schreiber_et_al.)/Homer         | 1e-3 | -7.475e+00 | 0.0039 | 569.0  | 2.72%  | 683.0   | 2.37%  | <a href="#">motif file (matrix)</a> | <a href="#">svg</a> |
| 64 |  | NF1:FOXA1(CTF,Forkhead)/LNCAP-FOXA1-ChIP-Seq(GSE27824)/Homer             | 1e-3 | -7.472e+00 | 0.0039 | 317.0  | 1.52%  | 362.8   | 1.26%  | <a href="#">motif file (matrix)</a> | <a href="#">svg</a> |
| 65 |  | GSC(Homeobox)/FrogEmbryos-GSC-ChIP-Seq(DRA000576)/Homer                  | 1e-3 | -6.994e+00 | 0.0062 | 6983.0 | 33.43% | 9335.6  | 32.42% | <a href="#">motif file (matrix)</a> | <a href="#">svg</a> |
| 66 |  | CEBP:AP1(bZIP)/ThioMac-CEBPb-ChIP-Seq(GSE21512)/Homer                    | 1e-3 | -6.959e+00 | 0.0063 | 3813.0 | 18.26% | 5020.1  | 17.43% | <a href="#">motif file (matrix)</a> | <a href="#">svg</a> |
| 67 |  | Oct2(POU,Homeobox)/Bcell-Oct2-ChIP-Seq(GSE21512)/Homer                   | 1e-2 | -6.588e+00 | 0.0090 | 1491.0 | 7.14%  | 1906.0  | 6.62%  | <a href="#">motif file (matrix)</a> | <a href="#">svg</a> |
| 68 |  | GATA(Zf),IR4/iTreg-Gata3-ChIP-Seq(GSE20898)/Homer                        | 1e-2 | -6.530e+00 | 0.0094 | 451.0  | 2.16%  | 539.5   | 1.87%  | <a href="#">motif file (matrix)</a> | <a href="#">svg</a> |
| 69 |  | Zfp809(Zf)/ES-Zfp809-ChIP-Seq(GSE70799)/Homer                            | 1e-2 | -6.291e+00 | 0.0118 | 1015.0 | 4.86%  | 1278.4  | 4.44%  | <a href="#">motif file (matrix)</a> | <a href="#">svg</a> |
| 70 |  | Hnf1(Homeobox)/Liver-Foxa2-ChIP-Seq(GSE25694)/Homer                      | 1e-2 | -6.226e+00 | 0.0124 | 645.0  | 3.09%  | 793.9   | 2.76%  | <a href="#">motif file (matrix)</a> | <a href="#">svg</a> |
| 71 |  | Sox7(HMG)/ESC-Sox7-ChIP-Seq(GSE133899)/Homer                             | 1e-2 | -5.485e+00 | 0.0256 | 1691.0 | 8.10%  | 2190.4  | 7.61%  | <a href="#">motif file (matrix)</a> | <a href="#">svg</a> |
| 72 |  | PAX3:FKHR-fusion(Paired,Homeobox)/Rh4-PAX3:FKHR-ChIP-Seq(GSE19063)/Homer | 1e-2 | -5.440e+00 | 0.0264 | 1200.0 | 5.75%  | 1535.0  | 5.33%  | <a href="#">motif file (matrix)</a> | <a href="#">svg</a> |

|    |                                                                                   |                                                    |      |            |        |        |        |        |        |                                     |                     |
|----|-----------------------------------------------------------------------------------|----------------------------------------------------|------|------------|--------|--------|--------|--------|--------|-------------------------------------|---------------------|
| 73 |   | PRDM14(Zf)/H1-PRDM14-ChIP-Seq(GSE22767)/Homer      | 1e-2 | -5.420e+00 | 0.0266 | 1983.0 | 9.49%  | 2583.0 | 8.97%  | <a href="#">motif file (matrix)</a> | <a href="#">svg</a> |
| 74 |  | Sp5(Zf)/mES-Sp5.Flag-ChIP-Seq(GSE72989)/Homer      | 1e-2 | -5.304e+00 | 0.0294 | 4658.0 | 22.30% | 6209.4 | 21.56% | <a href="#">motif file (matrix)</a> | <a href="#">svg</a> |
| 75 |  | CTCF(Zf)/CD4+-CTCF-ChIP-Seq(Barski_et_al.)/Homer   | 1e-2 | -5.249e+00 | 0.0307 | 886.0  | 4.24%  | 1121.9 | 3.90%  | <a href="#">motif file (matrix)</a> | <a href="#">svg</a> |
| 76 |  | SCRT1(Zf)/HEK293-SCRT1.eGFP-ChIP-Seq(Encode)/Homer | 1e-2 | -4.862e+00 | 0.0446 | 1838.0 | 8.80%  | 2400.0 | 8.33%  | <a href="#">motif file (matrix)</a> | <a href="#">svg</a> |
