# Supplementary material for: AP-2α and AP-2β cooperatively function in the craniofacial surface ectoderm to regulate chromatin and gene expression dynamics during facial development
Source: eLife journal article supplement (doi:10.7554/elife.70511), 2022-03-25
Supplement: supp [file elife-70511-supp-v1.zip]

# Homer Known Motif Enrichment Results (cluster2/)

[Homer de novo Motif Results](#)
[Gene Ontology Enrichment Results](#)
[Known Motif Enrichment Results \(txt file\)](#)

Total Target Sequences = 54946, Total Background Sequences = 54329

| Rank | Motif                                                                               | Name                                                   | P-value | log P-value | q-value (Benjamini) | # Target Sequences with Motif | % of Targets Sequences with Motif | # Background Sequences with Motif | % of Background Sequences with Motif | Motif File                          | SVG                 |
|------|-------------------------------------------------------------------------------------|--------------------------------------------------------|---------|-------------|---------------------|-------------------------------|-----------------------------------|-----------------------------------|--------------------------------------|-------------------------------------|---------------------|
| 1    |    | CTCF(Zf)/CD4+-CTCF-ChIP-Seq(Barski_et_al.)/Homer       | 1e-2528 | -5.822e+03  | 0.0000              | 9588.0                        | 17.45%                            | 2640.4                            | 4.86%                                | <a href="#">motif file (matrix)</a> | <a href="#">svg</a> |
| 2    |    | BORIS(Zf)/K562-CTCFL-ChIP-Seq(GSE32465)/Homer          | 1e-1970 | -4.538e+03  | 0.0000              | 10985.0                       | 20.00%                            | 3997.6                            | 7.36%                                | <a href="#">motif file (matrix)</a> | <a href="#">svg</a> |
| 3    |    | p73(p53)/Trachea-p73-ChIP-Seq(PRJNA310161)/Homer       | 1e-1505 | -3.466e+03  | 0.0000              | 4165.0                        | 7.58%                             | 827.8                             | 1.52%                                | <a href="#">motif file (matrix)</a> | <a href="#">svg</a> |
| 4    |    | p53(p53)/Saos-p53-ChIP-Seq(GSE15780)/Homer             | 1e-1413 | -3.254e+03  | 0.0000              | 5854.0                        | 10.66%                            | 1681.3                            | 3.10%                                | <a href="#">motif file (matrix)</a> | <a href="#">svg</a> |
| 5    |    | p53(p53)/Saos-p53-ChIP-Seq/Homer                       | 1e-1413 | -3.254e+03  | 0.0000              | 5854.0                        | 10.66%                            | 1681.3                            | 3.10%                                | <a href="#">motif file (matrix)</a> | <a href="#">svg</a> |
| 6    |    | p63(p53)/Keratinocyte-p63-ChIP-Seq(GSE17611)/Homer     | 1e-1313 | -3.025e+03  | 0.0000              | 12907.0                       | 23.50%                            | 6312.4                            | 11.63%                               | <a href="#">motif file (matrix)</a> | <a href="#">svg</a> |
| 7    |    | TEAD1(TEAD)/HepG2-TEAD1-ChIP-Seq(Encode)/Homer         | 1e-872  | -2.010e+03  | 0.0000              | 19969.0                       | 36.35%                            | 13156.4                           | 24.23%                               | <a href="#">motif file (matrix)</a> | <a href="#">svg</a> |
| 8    |   | TEAD4(TEA)/Tropoblast-Tead4-ChIP-Seq(GSE37350)/Homer   | 1e-786  | -1.811e+03  | 0.0000              | 18539.0                       | 33.75%                            | 12220.8                           | 22.51%                               | <a href="#">motif file (matrix)</a> | <a href="#">svg</a> |
| 9    |  | TEAD(TEA)/Fibroblast-PU.1-ChIP-Seq(Unpublished)/Homer  | 1e-740  | -1.705e+03  | 0.0000              | 14546.0                       | 26.48%                            | 9013.1                            | 16.60%                               | <a href="#">motif file (matrix)</a> | <a href="#">svg</a> |
| 10   |  | TEAD3(TEA)/HepG2-TEAD3-ChIP-Seq(Encode)/Homer          | 1e-710  | -1.636e+03  | 0.0000              | 21819.0                       | 39.72%                            | 15401.6                           | 28.36%                               | <a href="#">motif file (matrix)</a> | <a href="#">svg</a> |
| 11   |  | TEAD2(TEA)/Py2T-Tead2-ChIP-Seq(GSE55709)/Homer         | 1e-641  | -1.478e+03  | 0.0000              | 12540.0                       | 22.83%                            | 7693.0                            | 14.17%                               | <a href="#">motif file (matrix)</a> | <a href="#">svg</a> |
| 12   |  | AP-2alpha(AP2)/Hela-AP2alpha-ChIP-Seq(GSE31477)/Homer  | 1e-620  | -1.429e+03  | 0.0000              | 19624.0                       | 35.72%                            | 13809.3                           | 25.43%                               | <a href="#">motif file (matrix)</a> | <a href="#">svg</a> |
| 13   |  | AP-2gamma(AP2)/MCF7-TFAP2C-ChIP-Seq(GSE21234)/Homer    | 1e-503  | -1.160e+03  | 0.0000              | 23236.0                       | 42.30%                            | 17637.9                           | 32.48%                               | <a href="#">motif file (matrix)</a> | <a href="#">svg</a> |
| 14   |  | GRHL2(CP2)/HBE-GRHL2-ChIP-Seq(GSE46194)/Homer          | 1e-353  | -8.132e+02  | 0.0000              | 9011.0                        | 16.40%                            | 5827.9                            | 10.73%                               | <a href="#">motif file (matrix)</a> | <a href="#">svg</a> |
| 15   |  | Six1(Homeobox)/Myoblast-Six1-ChIP-Chip(GSE20150)/Homer | 1e-219  | -5.057e+02  | 0.0000              | 5183.0                        | 9.43%                             | 3246.0                            | 5.98%                                | <a href="#">motif file (matrix)</a> | <a href="#">svg</a> |

|    |                                                                                     |                                                            |        |            |        |         |        |         |        |                                     |                     |
|----|-------------------------------------------------------------------------------------|------------------------------------------------------------|--------|------------|--------|---------|--------|---------|--------|-------------------------------------|---------------------|
| 16 |     | p53(p53)/mES-cMyc-ChIP-Seq(GSE11431)/Homer                 | 1e-196 | -4.518e+02 | 0.0000 | 980.0   | 1.78%  | 313.2   | 0.58%  | <a href="#">motif file (matrix)</a> | <a href="#">svg</a> |
| 17 |    | Zfp281(Zf)/ES-Zfp281-ChIP-Seq(GSE81042)/Homer              | 1e-182 | -4.204e+02 | 0.0000 | 7366.0  | 13.41% | 5207.1  | 9.59%  | <a href="#">motif file (matrix)</a> | <a href="#">svg</a> |
| 18 |    | REST-NRSF(Zf)/Jurkat-NRSF-ChIP-Seq/Homer                   | 1e-181 | -4.187e+02 | 0.0000 | 608.0   | 1.11%  | 142.7   | 0.26%  | <a href="#">motif file (matrix)</a> | <a href="#">svg</a> |
| 19 |    | Pbx3(Homeobox)/GM12878-PBX3-ChIP-Seq(GSE32465)/Homer       | 1e-178 | -4.103e+02 | 0.0000 | 6037.0  | 10.99% | 4112.1  | 7.57%  | <a href="#">motif file (matrix)</a> | <a href="#">svg</a> |
| 20 |    | Six4(Homeobox)/MCF7-SIX4-ChIP-Seq(Encode)/Homer            | 1e-174 | -4.019e+02 | 0.0000 | 1535.0  | 2.79%  | 675.6   | 1.24%  | <a href="#">motif file (matrix)</a> | <a href="#">svg</a> |
| 21 |    | Pknox1(Homeobox)/ES-Prep1-ChIP-Seq(GSE63282)/Homer         | 1e-149 | -3.438e+02 | 0.0000 | 5617.0  | 10.22% | 3901.2  | 7.18%  | <a href="#">motif file (matrix)</a> | <a href="#">svg</a> |
| 22 |    | Tcf3(HMG)/mES-Tcf3-ChIP-Seq(GSE11724)/Homer                | 1e-148 | -3.413e+02 | 0.0000 | 5375.0  | 9.78%  | 3705.0  | 6.82%  | <a href="#">motif file (matrix)</a> | <a href="#">svg</a> |
| 23 |    | PBX1(Homeobox)/MCF7-PBX1-ChIP-Seq(GSE28007)/Homer          | 1e-148 | -3.412e+02 | 0.0000 | 2522.0  | 4.59%  | 1430.9  | 2.64%  | <a href="#">motif file (matrix)</a> | <a href="#">svg</a> |
| 24 |    | KLF3(Zf)/MEF-Klf3-ChIP-Seq(GSE44748)/Homer                 | 1e-147 | -3.403e+02 | 0.0000 | 11854.0 | 21.58% | 9377.3  | 17.27% | <a href="#">motif file (matrix)</a> | <a href="#">svg</a> |
| 25 |    | Sp1(Zf)/Promoter/Homer                                     | 1e-144 | -3.334e+02 | 0.0000 | 6134.0  | 11.17% | 4360.1  | 8.03%  | <a href="#">motif file (matrix)</a> | <a href="#">svg</a> |
| 26 |    | Dlx3(Homeobox)/Kerainocytes-Dlx3-ChIP-Seq(GSE89884)/Homer  | 1e-130 | -3.000e+02 | 0.0000 | 9587.0  | 17.45% | 7467.7  | 13.75% | <a href="#">motif file (matrix)</a> | <a href="#">svg</a> |
| 27 |   | DLX5(Homeobox)/BasalGanglia-Dlx5-ChIP-seq(GSE124936)/Homer | 1e-119 | -2.742e+02 | 0.0000 | 11241.0 | 20.46% | 9047.5  | 16.66% | <a href="#">motif file (matrix)</a> | <a href="#">svg</a> |
| 28 |  | Klf9(Zf)/GBM-Klf9-ChIP-Seq(GSE62211)/Homer                 | 1e-118 | -2.732e+02 | 0.0000 | 10051.0 | 18.30% | 7972.9  | 14.68% | <a href="#">motif file (matrix)</a> | <a href="#">svg</a> |
| 29 |  | TCFL2(HMG)/K562-TCF7L2-ChIP-Seq(GSE29196)/Homer            | 1e-91  | -2.098e+02 | 0.0000 | 2056.0  | 3.74%  | 1262.5  | 2.33%  | <a href="#">motif file (matrix)</a> | <a href="#">svg</a> |
| 30 |  | Tefcp211(CP2)/mES-Tefcp211-ChIP-Seq(GSE11431)/Homer        | 1e-90  | -2.092e+02 | 0.0000 | 3838.0  | 6.99%  | 2712.4  | 5.00%  | <a href="#">motif file (matrix)</a> | <a href="#">svg</a> |
| 31 |  | LEF1(HMG)/H1-LEF1-ChIP-Seq(GSE64758)/Homer                 | 1e-90  | -2.086e+02 | 0.0000 | 11586.0 | 21.09% | 9620.5  | 17.72% | <a href="#">motif file (matrix)</a> | <a href="#">svg</a> |
| 32 |  | Klf4(Zf)/mES-Klf4-ChIP-Seq(GSE11431)/Homer                 | 1e-83  | -1.928e+02 | 0.0000 | 8989.0  | 16.36% | 7304.4  | 13.45% | <a href="#">motif file (matrix)</a> | <a href="#">svg</a> |
| 33 |  | Sp5(Zf)/mES-Sp5.Flag-ChIP-Seq(GSE72989)/Homer              | 1e-83  | -1.922e+02 | 0.0000 | 19405.0 | 35.32% | 17071.1 | 31.44% | <a href="#">motif file (matrix)</a> | <a href="#">svg</a> |
| 34 |  | RFX(HTH)/K562-RFX3-ChIP-Seq(SRA012198)/Homer               | 1e-78  | -1.800e+02 | 0.0000 | 2141.0  | 3.90%  | 1379.7  | 2.54%  | <a href="#">motif file (matrix)</a> | <a href="#">svg</a> |

|    |                                                                                     |                                                                    |       |            |        |         |        |         |        |                                     |                     |
|----|-------------------------------------------------------------------------------------|--------------------------------------------------------------------|-------|------------|--------|---------|--------|---------|--------|-------------------------------------|---------------------|
| 35 |     | Rfx2(HTH)/LoVo-RFX2-ChIP-Seq(GSE49402)/Homer                       | 1e-73 | -1.689e+02 | 0.0000 | 2309.0  | 4.20%  | 1535.7  | 2.83%  | <a href="#">motif file (matrix)</a> | <a href="#">svg</a> |
| 36 |    | E2F3(E2F)/MEF-E2F3-ChIP-Seq(GSE71376)/Homer                        | 1e-71 | -1.642e+02 | 0.0000 | 9715.0  | 17.68% | 8089.7  | 14.90% | <a href="#">motif file (matrix)</a> | <a href="#">svg</a> |
| 37 |    | Six2(Homeobox)/NephronProgenitor-Six2-ChIP-Seq(GSE39837)/Homer     | 1e-63 | -1.463e+02 | 0.0000 | 15354.0 | 27.95% | 13464.8 | 24.80% | <a href="#">motif file (matrix)</a> | <a href="#">svg</a> |
| 38 |    | KLF1(Zf)/HUDEP2-KLF1-CutnRun(GSE136251)/Homer                      | 1e-62 | -1.443e+02 | 0.0000 | 17927.0 | 32.63% | 15932.3 | 29.34% | <a href="#">motif file (matrix)</a> | <a href="#">svg</a> |
| 39 |    | E2F7(E2F)/Hela-E2F7-ChIP-Seq(GSE32673)/Homer                       | 1e-58 | -1.351e+02 | 0.0000 | 2026.0  | 3.69%  | 1373.5  | 2.53%  | <a href="#">motif file (matrix)</a> | <a href="#">svg</a> |
| 40 |    | E2F4(E2F)/K562-E2F4-ChIP-Seq(GSE31477)/Homer                       | 1e-58 | -1.340e+02 | 0.0000 | 6368.0  | 11.59% | 5163.3  | 9.51%  | <a href="#">motif file (matrix)</a> | <a href="#">svg</a> |
| 41 |    | X-box(HTH)/NPC-H3K4me1-ChIP-Seq(GSE16256)/Homer                    | 1e-54 | -1.260e+02 | 0.0000 | 2386.0  | 4.34%  | 1692.1  | 3.12%  | <a href="#">motif file (matrix)</a> | <a href="#">svg</a> |
| 42 |    | Tcf7(HMG)/GM12878-TCF7-ChIP-Seq(Encode)/Homer                      | 1e-54 | -1.248e+02 | 0.0000 | 6156.0  | 11.21% | 5009.5  | 9.23%  | <a href="#">motif file (matrix)</a> | <a href="#">svg</a> |
| 43 |    | CTCF-SatelliteElement(Zf?)/CD4+-CTCF-ChIP-Seq(Barski_et_al.)/Homer | 1e-53 | -1.221e+02 | 0.0000 | 667.0   | 1.21%  | 341.3   | 0.63%  | <a href="#">motif file (matrix)</a> | <a href="#">svg</a> |
| 44 |    | Foxa3(Forkhead)/Liver-Foxa3-ChIP-Seq(GSE77670)/Homer               | 1e-46 | -1.082e+02 | 0.0000 | 5194.0  | 9.45%  | 4209.7  | 7.75%  | <a href="#">motif file (matrix)</a> | <a href="#">svg</a> |
| 45 |    | E2F1(E2F)/Hela-E2F1-ChIP-Seq(GSE22478)/Homer                       | 1e-43 | -1.009e+02 | 0.0000 | 3561.0  | 6.48%  | 2779.6  | 5.12%  | <a href="#">motif file (matrix)</a> | <a href="#">svg</a> |
| 46 |   | Tbx20(T-box)/Heart-Tbx20-ChIP-Seq(GSE29636)/Homer                  | 1e-43 | -9.922e+01 | 0.0000 | 4533.0  | 8.25%  | 3651.7  | 6.73%  | <a href="#">motif file (matrix)</a> | <a href="#">svg</a> |
| 47 |  | WT1(Zf)/Kidney-WT1-ChIP-Seq(GSE90016)/Homer                        | 1e-35 | -8.266e+01 | 0.0000 | 12080.0 | 21.99% | 10762.8 | 19.82% | <a href="#">motif file (matrix)</a> | <a href="#">svg</a> |
| 48 |  | E2F6(E2F)/Hela-E2F6-ChIP-Seq(GSE31477)/Homer                       | 1e-35 | -8.218e+01 | 0.0000 | 8087.0  | 14.72% | 7000.7  | 12.89% | <a href="#">motif file (matrix)</a> | <a href="#">svg</a> |
| 49 |  | Zfp809(Zf)/ES-Zfp809-ChIP-Seq(GSE70799)/Homer                      | 1e-34 | -8.010e+01 | 0.0000 | 4299.0  | 7.83%  | 3521.1  | 6.48%  | <a href="#">motif file (matrix)</a> | <a href="#">svg</a> |
| 50 |  | E2F(E2F)/Hela-CellCycle-Expression/Homer                           | 1e-29 | -6.740e+01 | 0.0000 | 860.0   | 1.57%  | 564.2   | 1.04%  | <a href="#">motif file (matrix)</a> | <a href="#">svg</a> |
| 51 |  | EKLF(Zf)/Erythrocyte-Klf1-ChIP-Seq(GSE20478)/Homer                 | 1e-29 | -6.714e+01 | 0.0000 | 4835.0  | 8.80%  | 4072.4  | 7.50%  | <a href="#">motif file (matrix)</a> | <a href="#">svg</a> |
| 52 |  | NFkB-p50,p52(RHD)/Monocyte-p50-ChIP-Chip(Schreiber_et_al.)/Homer   | 1e-27 | -6.339e+01 | 0.0000 | 2211.0  | 4.02%  | 1722.5  | 3.17%  | <a href="#">motif file (matrix)</a> | <a href="#">svg</a> |
| 53 |  | DLX1(Homeobox)/BasalGanglia-Dlx1-ChIP-seq(GSE124936)/Homer         | 1e-26 | -6.022e+01 | 0.0000 | 17287.0 | 31.47% | 15953.9 | 29.38% | <a href="#">motif file (matrix)</a> | <a href="#">svg</a> |

|    |  |                                                             |       |            |        |         |        |         |        |                                     |                     |
|----|--|-------------------------------------------------------------|-------|------------|--------|---------|--------|---------|--------|-------------------------------------|---------------------|
| 54 |  | NFkB-p65(RHD)/GM12787-p65-ChIP-Seq(GSE19485)/Homer          | 1e-26 | -6.006e+01 | 0.0000 | 8368.0  | 15.23% | 7410.3  | 13.65% | <a href="#">motif file (matrix)</a> | <a href="#">svg</a> |
| 55 |  | KLF6(Zf)/PDAC-KLF6-ChIP-Seq(GSE64557)/Homer                 | 1e-25 | -5.929e+01 | 0.0000 | 19346.0 | 35.22% | 17962.1 | 33.08% | <a href="#">motif file (matrix)</a> | <a href="#">svg</a> |
| 56 |  | Lhx2(Homeobox)/HFSC-Lhx2-ChIP-Seq(GSE48068)/Homer           | 1e-21 | -5.053e+01 | 0.0000 | 14252.0 | 25.94% | 13114.2 | 24.15% | <a href="#">motif file (matrix)</a> | <a href="#">svg</a> |
| 57 |  | NFkB-p65-Rel(RHD)/ThioMac-LPS-Expression(GSE23622)/Homer    | 1e-21 | -4.993e+01 | 0.0000 | 1108.0  | 2.02%  | 809.7   | 1.49%  | <a href="#">motif file (matrix)</a> | <a href="#">svg</a> |
| 58 |  | Egr2(Zf)/Thymocytes-Egr2-ChIP-Seq(GSE34254)/Homer           | 1e-20 | -4.610e+01 | 0.0000 | 3541.0  | 6.45%  | 2997.9  | 5.52%  | <a href="#">motif file (matrix)</a> | <a href="#">svg</a> |
| 59 |  | EBF(EBF)/proBcell-EBF-ChIP-Seq(GSE21978)/Homer              | 1e-19 | -4.466e+01 | 0.0000 | 4244.0  | 7.73%  | 3654.0  | 6.73%  | <a href="#">motif file (matrix)</a> | <a href="#">svg</a> |
| 60 |  | Zic3(Zf)/mES-Zic3-ChIP-Seq(GSE37889)/Homer                  | 1e-18 | -4.353e+01 | 0.0000 | 11701.0 | 21.30% | 10728.5 | 19.76% | <a href="#">motif file (matrix)</a> | <a href="#">svg</a> |
| 61 |  | IRF4(IRF)/GM12878-IRF4-ChIP-Seq(GSE32465)/Homer             | 1e-17 | -4.124e+01 | 0.0000 | 6520.0  | 11.87% | 5809.5  | 10.70% | <a href="#">motif file (matrix)</a> | <a href="#">svg</a> |
| 62 |  | FOXX2(Forkhead)/U2OS-FOXX2-ChIP-Seq(EMTAB-2204)/Homer       | 1e-17 | -4.122e+01 | 0.0000 | 9192.0  | 16.73% | 8347.9  | 15.37% | <a href="#">motif file (matrix)</a> | <a href="#">svg</a> |
| 63 |  | PBX2(Homeobox)/K562-PBX2-ChIP-Seq(Encode)/Homer             | 1e-16 | -3.752e+01 | 0.0000 | 11189.0 | 20.37% | 10298.8 | 18.97% | <a href="#">motif file (matrix)</a> | <a href="#">svg</a> |
| 64 |  | Zic2(Zf)/ESC-Zic2-ChIP-Seq(SRP197560)/Homer                 | 1e-15 | -3.661e+01 | 0.0000 | 9156.0  | 16.67% | 8357.9  | 15.39% | <a href="#">motif file (matrix)</a> | <a href="#">svg</a> |
| 65 |  | DLX2(Homeobox)/BasalGanglia-Dlx2-ChIP-seq(GSE124936)/Homer  | 1e-14 | -3.287e+01 | 0.0000 | 19041.0 | 34.66% | 17974.1 | 33.10% | <a href="#">motif file (matrix)</a> | <a href="#">svg</a> |
| 66 |  | Zfp57(Zf)/H1-ZFP57.HA-ChIP-Seq(GSE115387)/Homer             | 1e-14 | -3.265e+01 | 0.0000 | 5286.0  | 9.62%  | 4714.2  | 8.68%  | <a href="#">motif file (matrix)</a> | <a href="#">svg</a> |
| 67 |  | c-Myc(bHLH)/LNCAP-cMyc-ChIP-Seq(Unpublished)/Homer          | 1e-13 | -3.180e+01 | 0.0000 | 7025.0  | 12.79% | 6370.2  | 11.73% | <a href="#">motif file (matrix)</a> | <a href="#">svg</a> |
| 68 |  | bHLHE40(bHLH)/HepG2-BHLHE40-ChIP-Seq(GSE31477)/Homer        | 1e-13 | -3.152e+01 | 0.0000 | 4958.0  | 9.03%  | 4414.2  | 8.13%  | <a href="#">motif file (matrix)</a> | <a href="#">svg</a> |
| 69 |  | Jun-AP1(bZIP)/K562-cJun-ChIP-Seq(GSE31477)/Homer            | 1e-13 | -2.998e+01 | 0.0000 | 3627.0  | 6.60%  | 3177.0  | 5.85%  | <a href="#">motif file (matrix)</a> | <a href="#">svg</a> |
| 70 |  | Tbox:Smad(T-box,MAD)/EScD5-Smad2_3-ChIP-Seq(GSE29422)/Homer | 1e-11 | -2.612e+01 | 0.0000 | 3798.0  | 6.91%  | 3366.2  | 6.20%  | <a href="#">motif file (matrix)</a> | <a href="#">svg</a> |
| 71 |  | FOXP1(Forkhead)/H9-FOXP1-ChIP-Seq(GSE31006)/Homer           | 1e-11 | -2.563e+01 | 0.0000 | 6322.0  | 11.51% | 5761.4  | 10.61% | <a href="#">motif file (matrix)</a> | <a href="#">svg</a> |
| 72 |  | Fra1(bZIP)/BT549-Fra1-ChIP-Seq(GSE46166)/Homer              | 1e-11 | -2.539e+01 | 0.0000 | 7657.0  | 13.94% | 7040.2  | 12.97% | <a href="#">motif file (matrix)</a> | <a href="#">svg</a> |

|    |                                                                                     |                                                               |       |            |        |         |        |         |        |                                     |                     |
|----|-------------------------------------------------------------------------------------|---------------------------------------------------------------|-------|------------|--------|---------|--------|---------|--------|-------------------------------------|---------------------|
| 73 |     | Oct11(POU,Homeobox)/NCIH1048-POU2F3-ChIP-seq(GSE115123)/Homer | 1e-10 | -2.514e+01 | 0.0000 | 4188.0  | 7.62%  | 3741.0  | 6.89%  | <a href="#">motif file (matrix)</a> | <a href="#">svg</a> |
| 74 |    | Foxo3(Forkhead)/U2OS-Foxo3-ChIP-Seq(EMTAB-2701)/Homer         | 1e-10 | -2.437e+01 | 0.0000 | 10146.0 | 18.47% | 9447.2  | 17.40% | <a href="#">motif file (matrix)</a> | <a href="#">svg</a> |
| 75 |    | Rfx1(HTH)/NPC-H3K4me1-ChIP-Seq(GSE16256)/Homer                | 1e-10 | -2.338e+01 | 0.0000 | 3838.0  | 6.99%  | 3426.8  | 6.31%  | <a href="#">motif file (matrix)</a> | <a href="#">svg</a> |
| 76 |    | Foxh1(Forkhead)/hESC-FOXH1-ChIP-Seq(GSE29422)/Homer           | 1e-9  | -2.265e+01 | 0.0000 | 8426.0  | 15.34% | 7811.5  | 14.39% | <a href="#">motif file (matrix)</a> | <a href="#">svg</a> |
| 77 |    | Foxa2(Forkhead)/Liver-Foxa2-ChIP-Seq(GSE25694)/Homer          | 1e-9  | -2.168e+01 | 0.0000 | 11599.0 | 21.11% | 10890.4 | 20.06% | <a href="#">motif file (matrix)</a> | <a href="#">svg</a> |
| 78 |    | Fosl2(bZIP)/3T3L1-Fosl2-ChIP-Seq(GSE56872)/Homer              | 1e-9  | -2.165e+01 | 0.0000 | 4947.0  | 9.01%  | 4492.1  | 8.27%  | <a href="#">motif file (matrix)</a> | <a href="#">svg</a> |
| 79 |    | NF1(CTF)/LNCAP-NF1-ChIP-Seq(Unpublished)/Homer                | 1e-8  | -1.948e+01 | 0.0000 | 7216.0  | 13.14% | 6687.1  | 12.32% | <a href="#">motif file (matrix)</a> | <a href="#">svg</a> |
| 80 |    | Lhx1(Homeobox)/EmbryoCarcinoma-Lhx1-ChIP-Seq(GSE70957)/Homer  | 1e-8  | -1.934e+01 | 0.0000 | 14139.0 | 25.74% | 13396.0 | 24.67% | <a href="#">motif file (matrix)</a> | <a href="#">svg</a> |
| 81 |    | Hoxb4(Homeobox)/ES-Hoxb4-ChIP-Seq(GSE34014)/Homer             | 1e-8  | -1.866e+01 | 0.0000 | 2910.0  | 5.30%  | 2592.7  | 4.77%  | <a href="#">motif file (matrix)</a> | <a href="#">svg</a> |
| 82 |    | Meis1(Homeobox)/MastCells-Meis1-ChIP-Seq(GSE48085)/Homer      | 1e-7  | -1.808e+01 | 0.0000 | 27087.0 | 49.31% | 26130.5 | 48.12% | <a href="#">motif file (matrix)</a> | <a href="#">svg</a> |
| 83 |    | Fra2(bZIP)/Striatum-Fra2-ChIP-Seq(GSE43429)/Homer             | 1e-7  | -1.785e+01 | 0.0000 | 6721.0  | 12.23% | 6232.0  | 11.48% | <a href="#">motif file (matrix)</a> | <a href="#">svg</a> |
| 84 |   | Atf3(bZIP)/GBM-ATF3-ChIP-Seq(GSE33912)/Homer                  | 1e-7  | -1.713e+01 | 0.0000 | 9035.0  | 16.45% | 8474.6  | 15.61% | <a href="#">motif file (matrix)</a> | <a href="#">svg</a> |
| 85 |  | Arnt(Ahr(bHLH)/MCF7-Arnt-ChIP-Seq(Lo_et_al.)/Homer            | 1e-7  | -1.701e+01 | 0.0000 | 10246.0 | 18.65% | 9649.4  | 17.77% | <a href="#">motif file (matrix)</a> | <a href="#">svg</a> |
| 86 |  | Tlx?(NR)/NPC-H3K4me1-ChIP-Seq(GSE16256)/Homer                 | 1e-7  | -1.662e+01 | 0.0000 | 8597.0  | 15.65% | 8058.6  | 14.84% | <a href="#">motif file (matrix)</a> | <a href="#">svg</a> |
| 87 |  | ZSCAN22(Zf)/HEK293-ZSCAN22.GFP-ChIP-Seq(GSE58341)/Homer       | 1e-6  | -1.540e+01 | 0.0000 | 1569.0  | 2.86%  | 1363.5  | 2.51%  | <a href="#">motif file (matrix)</a> | <a href="#">svg</a> |
| 88 |  | GATA(Zf),IR4/iTreg-Gata3-ChIP-Seq(GSE20898)/Homer             | 1e-6  | -1.529e+01 | 0.0000 | 1033.0  | 1.88%  | 870.1   | 1.60%  | <a href="#">motif file (matrix)</a> | <a href="#">svg</a> |
| 89 |  | Otx2(Homeobox)/EpiLC-Otx2-ChIP-Seq(GSE56098)/Homer            | 1e-6  | -1.496e+01 | 0.0000 | 12968.0 | 23.61% | 12332.9 | 22.71% | <a href="#">motif file (matrix)</a> | <a href="#">svg</a> |
| 90 |  | CHR(?)/Hela-CellCycle-Expression/Homer                        | 1e-6  | -1.453e+01 | 0.0000 | 7742.0  | 14.09% | 7263.4  | 13.38% | <a href="#">motif file (matrix)</a> | <a href="#">svg</a> |
| 91 |  | HOXA2(Homeobox)/mES-Hoxa2-ChIP-Seq(Donaldson_et_al.)/Homer    | 1e-5  | -1.368e+01 | 0.0000 | 1555.0  | 2.83%  | 1362.3  | 2.51%  | <a href="#">motif file (matrix)</a> | <a href="#">svg</a> |

|     |  |                                                                       |      |            |        |         |        |         |        |                                     |                     |
|-----|--|-----------------------------------------------------------------------|------|------------|--------|---------|--------|---------|--------|-------------------------------------|---------------------|
| 92  |  | Bach2(bZIP)/OCILy7-Bach2-ChIP-Seq(GSE44420)/Homer                     | 1e-5 | -1.261e+01 | 0.0000 | 3057.0  | 5.56%  | 2788.7  | 5.14%  | <a href="#">motif file (matrix)</a> | <a href="#">svg</a> |
| 93  |  | HOXA1(Homeobox)/mES-Hoxa1-ChIP-Seq(SRP084292)/Homer                   | 1e-5 | -1.208e+01 | 0.0000 | 3640.0  | 6.63%  | 3350.2  | 6.17%  | <a href="#">motif file (matrix)</a> | <a href="#">svg</a> |
| 94  |  | JunB(bZIP)/DendriticCells-Junb-ChIP-Seq(GSE36099)/Homer               | 1e-5 | -1.169e+01 | 0.0000 | 7561.0  | 13.76% | 7134.9  | 13.14% | <a href="#">motif file (matrix)</a> | <a href="#">svg</a> |
| 95  |  | HIF-1a(bHLH)/MCF7-HIF1a-ChIP-Seq(GSE28352)/Homer                      | 1e-4 | -1.150e+01 | 0.0000 | 3620.0  | 6.59%  | 3338.0  | 6.15%  | <a href="#">motif file (matrix)</a> | <a href="#">svg</a> |
| 96  |  | EBF1(EBF)/Near-E2A-ChIP-Seq(GSE21512)/Homer                           | 1e-4 | -1.127e+01 | 0.0001 | 18571.0 | 33.81% | 17896.9 | 32.96% | <a href="#">motif file (matrix)</a> | <a href="#">svg</a> |
| 97  |  | Fox:Ebox(Forkhead,bHLH)/Panc1-Foxa2-ChIP-Seq(GSE47459)/Homer          | 1e-4 | -1.034e+01 | 0.0001 | 16263.0 | 29.60% | 15654.8 | 28.83% | <a href="#">motif file (matrix)</a> | <a href="#">svg</a> |
| 98  |  | Unknown-ESC-element(?)/mES-Nanog-ChIP-Seq(GSE11724)/Homer             | 1e-4 | -9.997e+00 | 0.0002 | 11525.0 | 20.98% | 11025.9 | 20.31% | <a href="#">motif file (matrix)</a> | <a href="#">svg</a> |
| 99  |  | JunD(bZIP)/K562-JunD-ChIP-Seq/Homer                                   | 1e-4 | -9.361e+00 | 0.0004 | 1312.0  | 2.39%  | 1168.2  | 2.15%  | <a href="#">motif file (matrix)</a> | <a href="#">svg</a> |
| 100 |  | PAX5(Paired,Homeobox),condensed/GM12878-PAX5-ChIP-Seq(GSE32465)/Homer | 1e-3 | -9.033e+00 | 0.0005 | 1847.0  | 3.36%  | 1676.2  | 3.09%  | <a href="#">motif file (matrix)</a> | <a href="#">svg</a> |
| 101 |  | AP-1(bZIP)/ThioMac-PU.1-ChIP-Seq(GSE21512)/Homer                      | 1e-3 | -8.531e+00 | 0.0009 | 10196.0 | 18.56% | 9761.7  | 17.98% | <a href="#">motif file (matrix)</a> | <a href="#">svg</a> |
| 102 |  | ZNF692(Zf)/HEK293-ZNF692.GFP-ChIP-Seq(GSE58341)/Homer                 | 1e-2 | -6.534e+00 | 0.0062 | 2414.0  | 4.39%  | 2247.7  | 4.14%  | <a href="#">motif file (matrix)</a> | <a href="#">svg</a> |
| 103 |  | BATF(bZIP)/Th17-BATF-ChIP-Seq(GSE39756)/Homer                         | 1e-2 | -6.515e+00 | 0.0063 | 8896.0  | 16.19% | 8541.9  | 15.73% | <a href="#">motif file (matrix)</a> | <a href="#">svg</a> |
| 104 |  | E-box(bHLH)/Promoter/Homer                                            | 1e-2 | -6.442e+00 | 0.0067 | 1118.0  | 2.04%  | 1011.8  | 1.86%  | <a href="#">motif file (matrix)</a> | <a href="#">svg</a> |
| 105 |  | Nrf2(bZIP)/Lymphoblast-Nrf2-ChIP-Seq(GSE37589)/Homer                  | 1e-2 | -5.529e+00 | 0.0166 | 765.0   | 1.39%  | 686.5   | 1.26%  | <a href="#">motif file (matrix)</a> | <a href="#">svg</a> |
| 106 |  | HIF2a(bHLH)/785_O-HIF2a-ChIP-Seq(GSE34871)/Homer                      | 1e-2 | -5.404e+00 | 0.0186 | 5020.0  | 9.14%  | 4789.2  | 8.82%  | <a href="#">motif file (matrix)</a> | <a href="#">svg</a> |
| 107 |  | OCT:OCT(POU,Homeobox,IR1)/NPC-Brn2-ChIP-Seq(GSE35496)/Homer           | 1e-2 | -5.396e+00 | 0.0186 | 192.0   | 0.35%  | 156.8   | 0.29%  | <a href="#">motif file (matrix)</a> | <a href="#">svg</a> |
| 108 |  | Oct2(POU,Homeobox)/Bcell-Oct2-ChIP-Seq(GSE21512)/Homer                | 1e-2 | -5.061e+00 | 0.0257 | 3398.0  | 6.19%  | 3221.5  | 5.93%  | <a href="#">motif file (matrix)</a> | <a href="#">svg</a> |
| 109 |  | Bach1(bZIP)/K562-Bach1-ChIP-Seq(GSE31477)/Homer                       | 1e-2 | -5.027e+00 | 0.0264 | 810.0   | 1.47%  | 733.0   | 1.35%  | <a href="#">motif file (matrix)</a> | <a href="#">svg</a> |
| 110 |  | En1(Homeobox)/SUM149-EN1-ChIP-Seq(GSE120957)/Homer                    | 1e-2 | -5.001e+00 | 0.0268 | 22565.0 | 41.08% | 22022.4 | 40.56% | <a href="#">motif file (matrix)</a> | <a href="#">svg</a> |

|     |                                                                                                     |                                                      |      |            |        |        |       |        |       |                                     |                     |
|-----|-----------------------------------------------------------------------------------------------------|------------------------------------------------------|------|------------|--------|--------|-------|--------|-------|-------------------------------------|---------------------|
| 111 |  <p>TATGCAATTAG</p> | Brn1(POU,Homeobox)/NPC-Brn1-ChIP-Seq(GSE35496)/Homer | 1e-2 | -4.687e+00 | 0.0364 | 4073.0 | 7.41% | 3884.9 | 7.15% | <a href="#">motif file (matrix)</a> | <a href="#">svg</a> |
|-----|-----------------------------------------------------------------------------------------------------|------------------------------------------------------|------|------------|--------|--------|-------|--------|-------|-------------------------------------|---------------------|
