# Supplementary material for: AP-2α and AP-2β cooperatively function in the craniofacial surface ectoderm to regulate chromatin and gene expression dynamics during facial development
Source: eLife. 2022 Mar 25;11:e70511. doi: 10.7554/eLife.70511 (PMC9038197; doi:10.7554/eLife.70511)
Supplement: Supplementary file 1. [file elife-70511-supp1.xlsx]

## Sheet: info
	Columns C, D	Average gene expression value in E11.5 ectoderm or mesenchyme (sum must be > 3.0)
	Columns E, F	Enrichment of gene expression for one tissue over the other
	Columns G, H, I	Whether ATAC-seq peak is near gene of interest (clusters 1, 2 and 3 from Figure 2E)
	Column J	Unique identifier for each cluster combination
	Column K, L, M	Total number of peaks associated with gene of interest
	Column N	Total number of C2 and C3 peaks associated with gene of interest

## Sheet: Supplemental Table 1
Gene	Common_name	ECT_AVG	MES_AVG	ECTvsMES	MESvsECT	CLUSTER1_PEAK	CLUSTER2_PEAK	CLUSTER3_PEAK	FINAL_CODE	TOTAL_CLUSTER1_PEAKS	TOTAL_CLUSTER2_PEAKS	TOTAL_CLUSTER3_PEAKS	SUMofC2aC3
ENSMUSG00000000001	Gnai3	157.657	169.163	0.931982	1.07298	NO	YES	NO	BAB	0	1	0	1
ENSMUSG00000000028	Cdc45	35.5015	47.0937	0.753848	1.32653	NO	NO	NO	BBB	0	0	0	0
ENSMUSG00000000031	H19	5277.58	3091.59	1.70708	0.585796	NO	NO	NO	BBB	0	0	0	0
ENSMUSG00000000037	Scml2	4.13232	5.69559	0.72553	1.3783	NO	NO	NO	BBB	0	0	0	0
ENSMUSG00000000056	Narf	42.8357	43.456	0.985725	1.01448	NO	NO	NO	BBB	0	0	0	0
ENSMUSG00000000058	Cav2	9.20869	4.17788	2.20415	0.453689	YES	YES	YES	AAA	1	1	1	2
ENSMUSG00000000088	Cox5a	309.532	314.659	0.983708	1.01656	YES	NO	NO	ABB	1	0	0	0
ENSMUSG00000000127	Fer	15.4117	15.559	0.990531	1.00956	NO	NO	NO	BBB	0	0	0	0
ENSMUSG00000000131	Xpo6	66.3431	69.2289	0.958315	1.0435	NO	YES	NO	BAB	0	1	0	1
ENSMUSG00000000134	Tfe3	30.0772	28.487	1.05582	0.947129	YES	YES	NO	AAB	1	1	0	1
ENSMUSG00000000148	Brat1	12.3924	12.1035	1.02387	0.976687	NO	NO	NO	BBB	0	0	0	0
ENSMUSG00000000167	Pih1d2	4.78639	3.04607	1.57133	0.636403	NO	NO	NO	BBB	0	0	0	0
ENSMUSG00000000171	Sdhd	141.683	187.959	0.7538	1.32661	NO	NO	NO	BBB	0	0	0	0
ENSMUSG00000000184	Ccnd2	527.891	181.137	2.91432	0.343133	NO	YES	YES	BAA	0	1	1	2
ENSMUSG00000000216	Scnn1g	3.98627	0.00477812	834.276	0.00119864	YES	NO	YES	ABA	1	0	3	3
ENSMUSG00000000223	Drp2	1.62468	5.34793	0.303796	3.29168	NO	NO	NO	BBB	0	0	0	0
ENSMUSG00000000244	Tspan32	0.0817582	3.54452	0.0230661	43.3538	YES	NO	NO	ABB	1	0	0	0
ENSMUSG00000000253	Gmpr	3.97164	14.2704	0.278313	3.59307	YES	YES	YES	AAA	4	2	1	3
ENSMUSG00000000275	Trim25	3.12837	2.91708	1.07243	0.93246	NO	NO	YES	BBA	0	0	1	1
ENSMUSG00000000276	Dgke	5.31673	3.76822	1.41094	0.708747	NO	NO	YES	BBA	0	0	1	1
ENSMUSG00000000278	Scpep1	25.4013	47.2553	0.537532	1.86035	NO	YES	YES	BAA	0	1	1	2
ENSMUSG00000000282	Mnt	27.8319	18.0807	1.53931	0.64964	YES	YES	YES	AAA	2	2	1	3
ENSMUSG00000000295	Hddc2	78.8746	82.6677	0.954116	1.04809	NO	NO	YES	BBA	0	0	3	3
ENSMUSG00000000296	Tpd52l1	13.0475	21.5392	0.605755	1.65083	NO	YES	YES	BAA	0	2	1	3
ENSMUSG00000000305	Cdh4	1.60891	3.69257	0.435715	2.29508	NO	YES	NO	BAB	0	2	0	2
ENSMUSG00000000308	Ckmt1	2.36708	5.85023	0.404614	2.47149	YES	YES	NO	AAB	1	1	0	1
ENSMUSG00000000317	Bcl6b	0.306878	6.31986	0.0485577	20.5941	NO	YES	NO	BAB	0	3	0	3
ENSMUSG00000000325	Arvcf	55.5985	30.1298	1.8453	0.541917	YES	YES	NO	AAB	1	1	0	1
ENSMUSG00000000326	Comt	37.5027	28.8564	1.29963	0.769448	YES	NO	NO	ABB	1	0	0	0
ENSMUSG00000000339	Rtca	45.5899	61.5731	0.74042	1.35059	NO	NO	YES	BBA	0	0	1	1
ENSMUSG00000000340	Dbt	18.2072	12.4032	1.46794	0.681225	NO	NO	NO	BBB	0	0	0	0
ENSMUSG00000000346	Dazap2	221.328	125.523	1.76324	0.567137	NO	YES	NO	BAB	0	1	0	1
ENSMUSG00000000355	Mcts1	67.6055	57.0858	1.18428	0.844396	NO	YES	NO	BAB	0	1	0	1
ENSMUSG00000000374	Trappc10	22.0838	17.0531	1.295	0.772201	YES	YES	NO	AAB	1	3	0	3
ENSMUSG00000000378	Ccm2	36.4571	57.62	0.632716	1.58049	NO	YES	NO	BAB	0	2	0	2
ENSMUSG00000000384	Tbrg4	62.5427	50.0032	1.25077	0.799506	NO	NO	NO	BBB	0	0	0	0
ENSMUSG00000000392	Fap	0.256507	7.28756	0.035198	28.4107	NO	NO	YES	BBA	0	0	2	2
ENSMUSG00000000399	Ndufa9	85.9926	96.8518	0.887878	1.12628	NO	YES	YES	BAA	0	1	1	2
ENSMUSG00000000402	Egfl6	12.6931	6.98224	1.81791	0.550084	YES	NO	YES	ABA	2	0	1	1
ENSMUSG00000000409	Lck	24.9086	12.4342	2.00323	0.499193	NO	NO	NO	BBB	0	0	0	0
ENSMUSG00000000416	Cttnbp2	3.0037	5.0972	0.589284	1.69697	NO	YES	NO	BAB	0	2	0	2
ENSMUSG00000000420	Galnt1	59.3151	74.8007	0.792976	1.26107	YES	NO	NO	ABB	1	0	0	0
ENSMUSG00000000439	Mkrn2	20.2508	24.8	0.816563	1.22465	NO	NO	NO	BBB	0	0	0	0
ENSMUSG00000000441	Raf1	101.058	116.945	0.864144	1.15721	YES	NO	YES	ABA	2	0	1	1
ENSMUSG00000000486	Septin1	6.33722	8.33813	0.760028	1.31574	NO	NO	NO	BBB	0	0	0	0
ENSMUSG00000000555	Itga5	8.67923	35.3538	0.245497	4.07337	NO	YES	NO	BAB	0	1	0	1
ENSMUSG00000000561	Wdr77	76.5547	56.3776	1.35789	0.736436	NO	NO	NO	BBB	0	0	0	0
ENSMUSG00000000563	Atp5f1	240.766	279.884	0.860234	1.16247	NO	NO	NO	BBB	0	0	0	0
ENSMUSG00000000567	Sox9	10.2566	31.7228	0.323319	3.09292	YES	YES	YES	AAA	2	1	1	2
ENSMUSG00000000581	C1d	99.7197	105.356	0.946503	1.05652	YES	NO	YES	ABA	1	0	1	1
ENSMUSG00000000594	Gm2a	5.61404	3.51754	1.59602	0.62656	YES	YES	NO	AAB	2	1	0	1
ENSMUSG00000000600	Krit1	16.458	14.8221	1.11037	0.900604	NO	NO	NO	BBB	0	0	0	0
ENSMUSG00000000605	Clcn4-2	23.8127	20.3912	1.1678	0.856313	NO	NO	NO	BBB	0	0	0	0
ENSMUSG00000000627	Sema4f	0.718396	5.48068	0.131078	7.62905	YES	YES	NO	AAB	2	1	0	1
ENSMUSG00000000631	Myo18a	29.2565	25.2849	1.15708	0.864248	NO	YES	NO	BAB	0	3	0	3
ENSMUSG00000000682	Cd52	0.685141	4.70673	0.145566	6.86972	YES	YES	NO	AAB	1	2	0	2
ENSMUSG00000000693	Loxl3	1.70597	8.12347	0.210005	4.7618	YES	YES	NO	AAB	1	1	0	1
ENSMUSG00000000708	Kat2b	4.65969	3.2319	1.44178	0.693586	NO	NO	YES	BBA	0	0	1	1
ENSMUSG00000000711	Rab5b	57.7612	46.945	1.2304	0.812742	NO	NO	NO	BBB	0	0	0	0
ENSMUSG00000000732	Icosl	1.93958	2.76352	0.701853	1.4248	YES	YES	YES	AAA	2	2	1	3
ENSMUSG00000000743	Chmp1a	98.685	75.3499	1.30969	0.763539	NO	YES	NO	BAB	0	3	0	3
ENSMUSG00000000751	Rpa1	104.784	131.473	0.797001	1.2547	YES	YES	NO	AAB	1	3	0	3
ENSMUSG00000000753	Serpinf1	10.4493	247.295	0.0422545	23.6661	YES	NO	NO	ABB	1	0	0	0
ENSMUSG00000000776	Polr3d	39.4983	38.1327	1.03581	0.965427	NO	NO	NO	BBB	0	0	0	0
ENSMUSG00000000804	Usp32	14.3063	9.75472	1.4666	0.681849	NO	NO	YES	BBA	0	0	1	1
ENSMUSG00000000811	Txnrd3	53.4938	59.5147	0.898832	1.11255	YES	YES	NO	AAB	3	1	0	1
ENSMUSG00000000823	Znf512b	55.7301	55.3778	1.00636	0.993677	NO	NO	NO	BBB	0	0	0	0
ENSMUSG00000000826	Dnajc5	68.9958	65.4656	1.05392	0.948836	NO	NO	NO	BBB	0	0	0	0
ENSMUSG00000000827	Tpd52l2	113.317	118.306	0.957836	1.04402	NO	NO	NO	BBB	0	0	0	0
ENSMUSG00000000838	Fmr1	58.5022	70.6293	0.828299	1.20729	NO	NO	YES	BBA	0	0	1	1
ENSMUSG00000000876	Pxmp4	11.5395	13.3837	0.862205	1.15982	NO	NO	NO	BBB	0	0	0	0
ENSMUSG00000000901	Mmp11	65.2135	48.6661	1.34002	0.746258	NO	YES	NO	BAB	0	2	0	2
ENSMUSG00000000902	Smarcb1	157.177	186.036	0.844876	1.18361	NO	NO	YES	BBA	0	0	1	1
ENSMUSG00000000916	Nsun5	14.2871	19.4171	0.735799	1.35907	NO	YES	YES	BAA	0	1	1	2
ENSMUSG00000000948	Snrpn	4.99815	3.23405	1.54548	0.64705	NO	YES	NO	BAB	0	1	0	1
ENSMUSG00000000957	Mmp14	103.367	105.821	0.976808	1.02374	YES	NO	YES	ABA	1	0	1	1
ENSMUSG00000000959	Oxa1l	47.2235	48.8031	0.967633	1.03345	NO	YES	NO	BAB	0	3	0	3
ENSMUSG00000000976	Heatr6	16.9409	17.2778	0.980503	1.01988	NO	YES	YES	BAA	0	2	1	3
ENSMUSG00000001016	Ilf2	249.684	304.78	0.819228	1.22066	NO	NO	NO	BBB	0	0	0	0
ENSMUSG00000001017	Chtop	208.908	224.043	0.932447	1.07245	NO	NO	NO	BBB	0	0	0	0
ENSMUSG00000001018	Snapin	42.2456	31.4906	1.34153	0.745415	NO	NO	NO	BBB	0	0	0	0
ENSMUSG00000001020	S100a4	0.0535508	6.74325	0.00794139	125.923	NO	YES	NO	BAB	0	1	0	1
ENSMUSG00000001025	S100a6	25.1084	17.3987	1.44312	0.692942	NO	YES	NO	BAB	0	3	0	3
ENSMUSG00000001034	Mapk7	49.4831	81.3594	0.608203	1.64419	NO	NO	NO	BBB	0	0	0	0
ENSMUSG00000001036	Epn2	25.5313	22.9714	1.11144	0.899733	YES	NO	NO	ABB	1	0	0	0
ENSMUSG00000001039	B9d1	41.9443	41.9029	1.00099	0.999013	NO	NO	NO	BBB	0	0	0	0
ENSMUSG00000001052	Sec24b	47.472	52.074	0.911627	1.09694	NO	YES	YES	BAA	0	1	2	3
ENSMUSG00000001053	N4bp3	7.55017	12.0305	0.627588	1.5934	NO	YES	NO	BAB	0	1	0	1
ENSMUSG00000001054	Rmnd5b	19.5144	21.4508	0.909725	1.09923	NO	YES	NO	BAB	0	1	0	1
ENSMUSG00000001056	Nhp2	121.77	99.9921	1.21779	0.821158	NO	YES	NO	BAB	0	2	0	2
ENSMUSG00000001062	Vps9d1	20.8995	26.807	0.779627	1.28266	NO	NO	NO	BBB	0	0	0	0
ENSMUSG00000001082	Mfsd10	39.762	46.9753	0.846444	1.18141	YES	YES	YES	AAA	1	1	1	2
ENSMUSG00000001089	Luzp1	75.8895	36.6617	2.06999	0.483094	NO	YES	YES	BAA	0	1	2	3
ENSMUSG00000001100	Poldip2	101.108	119.807	0.843927	1.18494	NO	NO	YES	BBA	0	0	1	1
ENSMUSG00000001105	Ift20	59.518	66.3773	0.896662	1.11525	NO	NO	NO	BBB	0	0	0	0
ENSMUSG00000001119	Col6a1	0.82944	30.2539	0.027416	36.4751	YES	YES	NO	AAB	1	2	0	2
ENSMUSG00000001120	Pcbp3	10.1011	22.3689	0.451569	2.2145	YES	YES	YES	AAA	1	1	1	2
ENSMUSG00000001127	Araf	49.5939	44.0993	1.1246	0.889209	YES	NO	NO	ABB	3	0	0	0
ENSMUSG00000001128	Cfp	3.55503	5.4936	0.647122	1.5453	NO	NO	YES	BBA	0	0	1	1
ENSMUSG00000001131	Timp1	2.98221	14.683	0.203107	4.92351	YES	NO	NO	ABB	1	0	0	0
ENSMUSG00000001134	Uxt	17.537	15.7918	1.11051	0.900486	NO	NO	NO	BBB	0	0	0	0
ENSMUSG00000001138	Cnnm3	23.0269	17.3991	1.32346	0.755595	NO	YES	NO	BAB	0	2	0	2
ENSMUSG00000001143	Lman2l	29.2588	29.6401	0.987136	1.01303	NO	YES	NO	BAB	0	1	0	1
ENSMUSG00000001150	Mcm3ap	23.5818	26.3731	0.894162	1.11837	NO	NO	NO	BBB	0	0	0	0
ENSMUSG00000001151	Pcnt	12.5463	11.791	1.06406	0.939795	NO	NO	NO	BBB	0	0	0	0
ENSMUSG00000001156	Mxd1	9.78769	10.1747	0.961968	1.03954	NO	YES	NO	BAB	0	1	0	1
ENSMUSG00000001157	Gmcl1	37.0341	39.2068	0.944583	1.05867	NO	NO	NO	BBB	0	0	0	0
ENSMUSG00000001158	Snrnp27	105.5	115.518	0.913274	1.09496	NO	NO	NO	BBB	0	0	0	0
ENSMUSG00000001173	Ocrl	21.5444	20.2521	1.06381	0.940019	NO	YES	NO	BAB	0	1	0	1
ENSMUSG00000001228	Uhrf1	190.627	178.205	1.06971	0.934836	NO	NO	YES	BBA	0	0	1	1
ENSMUSG00000001229	Dpp9	33.6901	33.6807	1.00028	0.999721	YES	NO	YES	ABA	2	0	2	2
ENSMUSG00000001240	Ramp2	0.544641	43.2246	0.0126002	79.3635	YES	NO	NO	ABB	1	0	0	0
ENSMUSG00000001247	Lsr	101.011	4.44656	22.7167	0.0440205	NO	NO	NO	BBB	0	0	0	0
ENSMUSG00000001248	Gramd1a	34.0788	42.5339	0.801215	1.2481	YES	NO	YES	ABA	2	0	2	2
ENSMUSG00000001249	Hpn	9.60431	0.748117	12.838	0.0778938	NO	YES	NO	BAB	0	3	0	3
ENSMUSG00000001285	Myg1	75.9325	96.8659	0.783893	1.27568	NO	NO	NO	BBB	0	0	0	0
ENSMUSG00000001289	Pfdn5	218.659	253.258	0.863382	1.15824	NO	YES	NO	BAB	0	2	0	2
ENSMUSG00000001305	Rrp15	53.2949	53.9753	0.987396	1.01277	YES	YES	YES	AAA	2	2	1	3
ENSMUSG00000001313	Rnd2	9.05642	12.5419	0.722092	1.38487	NO	YES	NO	BAB	0	1	0	1
ENSMUSG00000001323	Srr	12.1013	26.0818	0.463977	2.15528	NO	NO	NO	BBB	0	0	0	0
ENSMUSG00000001348	Acp5	2.88986	10.9189	0.264666	3.77835	YES	YES	NO	AAB	1	1	0	1
ENSMUSG00000001366	Fbxo9	24.0727	26.4767	0.909204	1.09986	NO	YES	NO	BAB	0	3	0	3
ENSMUSG00000001376	Ccdc132	28.0481	27.8931	1.00556	0.994473	NO	NO	NO	BBB	0	0	0	0
ENSMUSG00000001380	Hars	65.8906	80.9763	0.813703	1.22895	NO	NO	NO	BBB	0	0	0	0
ENSMUSG00000001383	Zmat2	130.546	135.049	0.966653	1.0345	NO	NO	NO	BBB	0	0	0	0
ENSMUSG00000001403	Ube2c	280.892	355.811	0.789439	1.26672	NO	NO	NO	BBB	0	0	0	0
ENSMUSG00000001415	Smg5	71.0376	71.6423	0.991559	1.00851	NO	YES	NO	BAB	0	1	0	1
ENSMUSG00000001416	Cct3	409.019	493.095	0.829494	1.20555	NO	NO	NO	BBB	0	0	0	0
ENSMUSG00000001418	Glmp	95.5148	95.1495	1.00384	0.996175	NO	NO	NO	BBB	0	0	0	0
ENSMUSG00000001420	Tmem79	17.3882	1.82667	9.51907	0.105052	NO	YES	NO	BAB	0	1	0	1
ENSMUSG00000001424	Snd1	125.919	103.416	1.2176	0.821289	NO	YES	NO	BAB	0	2	0	2
ENSMUSG00000001436	Slc19a1	15.1445	19.2709	0.785876	1.27247	YES	YES	NO	AAB	1	2	0	2
ENSMUSG00000001440	Kpnb1	279.408	307.564	0.908456	1.10077	NO	YES	NO	BAB	0	1	0	1
ENSMUSG00000001441	Npepps	69.3356	51.982	1.33384	0.749716	NO	YES	YES	BAA	0	2	1	3
ENSMUSG00000001445	Mrpl10	74.8426	75.6024	0.98995	1.01015	NO	NO	NO	BBB	0	0	0	0
ENSMUSG00000001467	Cyp51	62.4807	86.969	0.718426	1.39193	NO	YES	YES	BAA	0	2	1	3
ENSMUSG00000001473	Tubb6	6.77056	31.0852	0.217807	4.59122	YES	NO	NO	ABB	1	0	0	0
ENSMUSG00000001517	Foxm1	63.2742	84.9001	0.745279	1.34178	NO	NO	YES	BBA	0	0	1	1
ENSMUSG00000001518	Itfg2	16.9637	19.386	0.875051	1.14279	NO	YES	NO	BAB	0	1	0	1
ENSMUSG00000001524	Gtf2h4	28.3053	39.517	0.716281	1.3961	NO	YES	NO	BAB	0	3	0	3
ENSMUSG00000001525	Tubb5	1911.34	2559.6	0.746735	1.33916	NO	YES	NO	BAB	0	1	0	1
ENSMUSG00000001542	Ell2	14.641	3.78037	3.87291	0.258204	YES	NO	NO	ABB	1	0	0	0
ENSMUSG00000001555	Fkbp10	29.1514	70.3286	0.414502	2.41253	NO	NO	NO	BBB	0	0	0	0
ENSMUSG00000001569	Nom1	31.9727	26.4297	1.20973	0.826633	YES	YES	NO	AAB	1	2	0	2
ENSMUSG00000001576	Ergic1	151.47	141.605	1.06967	0.93487	YES	YES	YES	AAA	1	2	1	3
ENSMUSG00000001583	Tnk1	10.216	0.0745945	136.954	0.00730171	NO	YES	YES	BAA	0	1	1	2
ENSMUSG00000001627	Ifrd1	54.7493	82.3241	0.665045	1.50366	YES	NO	YES	ABA	1	0	2	2
ENSMUSG00000001630	Stk38l	12.2884	10.377	1.1842	0.844453	NO	YES	NO	BAB	0	1	0	1
ENSMUSG00000001632	Brpf1	30.2796	28.7068	1.05479	0.948057	NO	NO	YES	BBA	0	0	2	2
ENSMUSG00000001642	Akr1b3	38.19	53.4442	0.714577	1.39943	YES	YES	YES	AAA	2	1	1	2
ENSMUSG00000001663	Gstt1	4.23642	5.12201	0.827101	1.20904	NO	YES	NO	BAB	0	2	0	2
ENSMUSG00000001665	Gstt3	9.17189	2.10626	4.35457	0.229644	NO	YES	NO	BAB	0	1	0	1
ENSMUSG00000001666	Ddt	86.2327	103.05	0.836805	1.19502	NO	YES	NO	BAB	0	1	0	1
ENSMUSG00000001674	Ddx18	68.2254	62.8926	1.08479	0.921836	NO	NO	NO	BBB	0	0	0	0
ENSMUSG00000001729	Akt1	194.597	207.175	0.93929	1.06463	YES	YES	NO	AAB	1	3	0	3
ENSMUSG00000001750	Tcirg1	9.32765	18.3679	0.507824	1.96918	NO	YES	YES	BAA	0	1	2	3
ENSMUSG00000001755	Coasy	40.6745	31.4411	1.29367	0.772993	NO	NO	YES	BBA	0	0	1	1
ENSMUSG00000001761	Smo	143.69	145.312	0.98884	1.01129	YES	YES	YES	AAA	1	2	1	3
ENSMUSG00000001767	Crnkl1	37.3062	35.8631	1.04024	0.961318	NO	NO	NO	BBB	0	0	0	0
ENSMUSG00000001774	Chordc1	77.5014	75.4462	1.02724	0.973482	NO	NO	NO	BBB	0	0	0	0
ENSMUSG00000001783	Rtcb	204.82	195.996	1.04502	0.956919	YES	NO	YES	ABA	1	0	1	1
ENSMUSG00000001785	Pwp1	63.856	67.1948	0.950311	1.05229	YES	NO	NO	ABB	1	0	0	0
ENSMUSG00000001786	Fbxo7	18.3949	14.2551	1.29041	0.77495	YES	NO	NO	ABB	1	0	0	0
ENSMUSG00000001794	Capns1	152.219	195.873	0.777132	1.28678	YES	YES	NO	AAB	1	2	0	2
ENSMUSG00000001802	Lrp3	35.0238	45.5545	0.768833	1.30067	YES	YES	YES	AAA	2	1	1	2
ENSMUSG00000001829	Clpb	28.2059	29.1578	0.967352	1.03375	YES	YES	NO	AAB	1	1	0	1
ENSMUSG00000001833	Septin7	147.997	207.352	0.713748	1.40105	NO	NO	NO	BBB	0	0	0	0
ENSMUSG00000001844	Zdhhc4	34.5678	40.0421	0.863287	1.15836	NO	YES	NO	BAB	0	1	0	1
ENSMUSG00000001847	Rac1	283.44	326.711	0.867555	1.15266	NO	YES	NO	BAB	0	2	0	2
ENSMUSG00000001855	Nup214	32.7761	28.7873	1.13856	0.878302	NO	YES	NO	BAB	0	1	0	1
ENSMUSG00000001870	Ltbp1	13.6814	22.9528	0.596068	1.67766	YES	YES	YES	AAA	1	2	1	3
ENSMUSG00000001891	Ugp2	62.2925	60.9536	1.02197	0.978506	NO	NO	YES	BBA	0	0	3	3
ENSMUSG00000001909	Trmt1	59.9804	59.8589	1.00203	0.997974	NO	NO	NO	BBB	0	0	0	0
ENSMUSG00000001910	Nacc1	98.6573	86.6394	1.13871	0.878185	NO	NO	NO	BBB	0	0	0	0
ENSMUSG00000001918	Slc1a5	28.4857	24.7268	1.15202	0.868043	NO	YES	YES	BAA	0	1	1	2
ENSMUSG00000001924	Uba1	209.894	228.437	0.918825	1.08835	NO	NO	NO	BBB	0	0	0	0
ENSMUSG00000001942	Siae	5.34297	4.26714	1.25212	0.798646	YES	NO	NO	ABB	1	0	0	0
ENSMUSG00000001946	Esam	0.174203	21.5937	0.00806733	123.957	NO	YES	NO	BAB	0	2	0	2
ENSMUSG00000001948	Spa17	7.98628	7.1222	1.12132	0.891804	NO	NO	NO	BBB	0	0	0	0
ENSMUSG00000001962	Fam50a	39.334	45.3141	0.868029	1.15204	NO	NO	NO	BBB	0	0	0	0
ENSMUSG00000001964	Emd	165.256	156.05	1.05899	0.944293	NO	NO	NO	BBB	0	0	0	0
ENSMUSG00000001983	Taco1	24.7714	25.4443	0.973554	1.02716	NO	YES	NO	BAB	0	1	0	1
ENSMUSG00000001986	Gria3	6.25437	4.30966	1.45124	0.689064	YES	YES	YES	AAA	1	1	2	3
ENSMUSG00000001999	Blvra	29.5665	20.615	1.43422	0.697242	NO	NO	NO	BBB	0	0	0	0
ENSMUSG00000002006	Pdzd4	20.6659	27.3881	0.754558	1.32528	YES	NO	YES	ABA	2	0	2	2
ENSMUSG00000002010	Idh3g	93.5251	106.486	0.878284	1.13858	NO	NO	NO	BBB	0	0	0	0
ENSMUSG00000002012	Pnck	9.68482	4.89766	1.97744	0.505705	YES	YES	NO	AAB	1	1	0	1
ENSMUSG00000002014	Ssr4	103.452	90.0668	1.14861	0.870616	YES	NO	NO	ABB	2	0	0	0
ENSMUSG00000002015	Bcap31	90.9952	69.1441	1.31602	0.759866	YES	NO	NO	ABB	1	0	0	0
ENSMUSG00000002017	Fam98a	36.672	34.2843	1.06964	0.93489	NO	YES	NO	BAB	0	2	0	2
ENSMUSG00000002028	Kmt2a	11.9167	14.4817	0.822877	1.21525	NO	NO	YES	BBA	0	0	1	1
ENSMUSG00000002031	Ift46	86.4236	92.5278	0.934029	1.07063	NO	NO	NO	BBB	0	0	0	0
ENSMUSG00000002043	Trappc6a	67.4963	36.9602	1.82619	0.547588	NO	NO	YES	BBA	0	0	1	1
ENSMUSG00000002052	Supt6	42.3652	41.227	1.02761	0.973134	NO	YES	NO	BAB	0	1	0	1
ENSMUSG00000002055	Spag5	50.3924	71.9285	0.70059	1.42737	NO	NO	NO	BBB	0	0	0	0
ENSMUSG00000002059	Rab34	71.5445	104.038	0.68768	1.45416	NO	NO	NO	BBB	0	0	0	0
ENSMUSG00000002064	Sdf2	68.3828	51.0932	1.33839	0.747164	YES	NO	NO	ABB	1	0	0	0
ENSMUSG00000002102	Psmc3	266.104	314.031	0.847384	1.1801	NO	YES	NO	BAB	0	2	0	2
ENSMUSG00000002103	Acp2	17.656	26.667	0.662094	1.51036	NO	NO	NO	BBB	0	0	0	0
ENSMUSG00000002105	Slc39a13	10.5337	18.2029	0.57868	1.72807	YES	YES	NO	AAB	1	2	0	2
ENSMUSG00000002109	Ddb2	11.5431	10.661	1.08274	0.923586	NO	NO	NO	BBB	0	0	0	0
ENSMUSG00000002129	Sf3a1	92.645	101.088	0.916481	1.09113	NO	NO	NO	BBB	0	0	0	0
ENSMUSG00000002147	Stat6	13.4722	7.87373	1.71103	0.584444	NO	YES	YES	BAA	0	2	1	3
ENSMUSG00000002190	Clgn	0.319358	3.63433	0.0878726	11.3801	YES	NO	NO	ABB	1	0	0	0
ENSMUSG00000002205	Vrk3	39.5719	37.3601	1.0592	0.944106	NO	YES	YES	BAA	0	1	1	2
ENSMUSG00000002210	Smg9	17.621	15.4343	1.14168	0.875902	YES	YES	YES	AAA	2	2	1	3
ENSMUSG00000002222	Rmnd5a	73.9634	55.7309	1.32715	0.753494	NO	NO	YES	BBA	0	0	1	1
ENSMUSG00000002265	Peg3	60.5039	143.626	0.421259	2.37384	NO	NO	NO	BBB	0	0	0	0
ENSMUSG00000002266	Zim1	4.58915	7.70564	0.595557	1.6791	YES	NO	YES	ABA	1	0	1	1
ENSMUSG00000002274	Metrn	23.1955	77.8733	0.297862	3.35726	NO	YES	NO	BAB	0	1	0	1
ENSMUSG00000002279	Lmf1	14.1188	17.6047	0.801991	1.2469	NO	YES	YES	BAA	0	1	1	2
ENSMUSG00000002280	Narfl	21.4298	17.2313	1.24365	0.804083	NO	NO	NO	BBB	0	0	0	0
ENSMUSG00000002289	Angptl4	5.96939	35.2181	0.169498	5.89978	YES	YES	NO	AAB	1	1	0	1
ENSMUSG00000002297	Dbf4	84.2308	88.2713	0.954226	1.04797	NO	NO	YES	BBA	0	0	2	2
ENSMUSG00000002307	Daxx	47.6911	48.9553	0.974177	1.02651	NO	NO	NO	BBB	0	0	0	0
ENSMUSG00000002308	Cd320	61.925	48.5302	1.27601	0.783694	NO	NO	NO	BBB	0	0	0	0
ENSMUSG00000002319	Ipo4	54.0858	60.6889	0.891198	1.12209	NO	YES	NO	BAB	0	1	0	1
ENSMUSG00000002320	Tm9sf1	61.8007	57.9492	1.06646	0.937679	NO	NO	NO	BBB	0	0	0	0
ENSMUSG00000002324	Rec8	4.80629	5.00278	0.960722	1.04088	NO	YES	NO	BAB	0	1	0	1
ENSMUSG00000002325	Irf9	11.4909	9.64208	1.19175	0.839104	YES	NO	NO	ABB	1	0	0	0
ENSMUSG00000002326	Gmpr2	33.0071	41.5871	0.793685	1.25995	NO	NO	NO	BBB	0	0	0	0
ENSMUSG00000002329	Mdp1	34.9945	40.3687	0.866873	1.15357	NO	NO	NO	BBB	0	0	0	0
ENSMUSG00000002332	Dhrs1	71.9325	78.5944	0.915237	1.09261	NO	YES	NO	BAB	0	1	0	1
ENSMUSG00000002342	Tmem161a	45.0739	43.5971	1.03387	0.967236	YES	YES	YES	AAA	2	1	1	2
ENSMUSG00000002343	Armc6	10.3726	15.5446	0.667284	1.49861	NO	NO	NO	BBB	0	0	0	0
ENSMUSG00000002345	2310045N01Rik	69.2376	53.3753	1.29719	0.7709	NO	NO	NO	BBB	0	0	0	0
ENSMUSG00000002346	Slc25a42	1.77936	2.0679	0.860469	1.16216	NO	NO	YES	BBA	0	0	1	1
ENSMUSG00000002372	Ranbp3	80.5799	96.3689	0.836161	1.19594	NO	YES	YES	BAA	0	1	1	2
ENSMUSG00000002393	Nr2f6	97.1384	60.1293	1.61549	0.619007	NO	YES	YES	BAA	0	1	1	2
ENSMUSG00000002395	Use1	94.1354	89.9787	1.0462	0.955843	NO	NO	NO	BBB	0	0	0	0
ENSMUSG00000002409	Dyrk1b	23.0441	21.8513	1.05459	0.948237	YES	NO	YES	ABA	1	0	2	2
ENSMUSG00000002416	Ndufb2	131.427	138.821	0.946736	1.05626	NO	NO	YES	BBA	0	0	1	1
ENSMUSG00000002428	Hltf	26.2492	10.2566	2.55924	0.39074	NO	YES	NO	BAB	0	3	0	3
ENSMUSG00000002455	Prpf6	58.0979	55.8794	1.0397	0.961814	YES	NO	YES	ABA	1	0	1	1
ENSMUSG00000002458	Rgs19	50.5997	59.5677	0.849448	1.17724	NO	NO	NO	BBB	0	0	0	0
ENSMUSG00000002477	Snrpd1	344.384	342.934	1.00423	0.99579	NO	NO	NO	BBB	0	0	0	0
ENSMUSG00000002486	Tchp	14.762	15.2117	0.970437	1.03046	NO	NO	YES	BBA	0	0	1	1
ENSMUSG00000002496	Tsc2	28.6223	28.2966	1.01151	0.988622	NO	YES	YES	BAA	0	1	1	2
ENSMUSG00000002504	Slc9a3r2	13.2122	31.281	0.422372	2.36758	NO	YES	NO	BAB	0	3	0	3
ENSMUSG00000002524	Puf60	207.797	188.275	1.10369	0.906054	NO	YES	YES	BAA	0	1	1	2
ENSMUSG00000002550	Uck1	37.8373	38.0925	0.993301	1.00674	NO	NO	YES	BBA	0	0	1	1
ENSMUSG00000002578	Ikzf4	5.34679	6.2631	0.853697	1.17138	YES	YES	NO	AAB	1	2	0	2
ENSMUSG00000002580	Mien1	60.9652	47.6786	1.27867	0.782061	NO	YES	YES	BAA	0	1	1	2
ENSMUSG00000002602	Axl	52.5013	40.4881	1.29671	0.771183	YES	YES	NO	AAB	2	2	0	2
ENSMUSG00000002617	Zfp40	6.78823	11.3692	0.597072	1.67484	NO	NO	NO	BBB	0	0	0	0
ENSMUSG00000002625	Akap8l	19.9715	19.8527	1.00598	0.994054	NO	NO	YES	BBA	0	0	2	2
ENSMUSG00000002635	Pdcd2l	31.9441	40.0261	0.798083	1.253	NO	YES	NO	BAB	0	1	0	1
ENSMUSG00000002658	Gtf2f1	64.6506	59.695	1.08301	0.923348	NO	NO	YES	BBA	0	0	1	1
ENSMUSG00000002660	Clpp	63.9367	68.7878	0.929476	1.07587	NO	NO	NO	BBB	0	0	0	0
ENSMUSG00000002661	Alkbh7	24.0317	24.4481	0.982968	1.01733	NO	NO	NO	BBB	0	0	0	0
ENSMUSG00000002668	Dennd1c	5.59723	0.232555	24.0684	0.0415482	YES	NO	NO	ABB	1	0	0	0
ENSMUSG00000002679	Med6	80.7694	82.8155	0.975293	1.02533	NO	NO	YES	BBA	0	0	3	3
ENSMUSG00000002688	Prkd1	2.02537	10.4593	0.193643	5.16413	NO	NO	YES	BBA	0	0	2	2
ENSMUSG00000002718	Cse1l	161.289	173.379	0.93027	1.07496	NO	NO	YES	BBA	0	0	2	2
ENSMUSG00000002731	Prkra	65.6666	69.8629	0.939936	1.0639	NO	NO	YES	BBA	0	0	1	1
ENSMUSG00000002732	Fkbp7	11.7332	38.1658	0.307427	3.25281	NO	YES	YES	BAA	0	1	1	2
ENSMUSG00000002733	Plekha3	21.1775	18.1577	1.16631	0.857402	NO	YES	NO	BAB	0	1	0	1
ENSMUSG00000002748	Baz1b	97.2679	128.189	0.758788	1.31789	NO	NO	YES	BBA	0	0	1	1
ENSMUSG00000002763	Pex6	38.3665	33.6423	1.14042	0.876867	NO	YES	NO	BAB	0	1	0	1
ENSMUSG00000002767	Mrpl2	62.5714	71.5428	0.874601	1.14338	NO	NO	NO	BBB	0	0	0	0
ENSMUSG00000002768	Mea1	133.108	144.464	0.921391	1.08532	NO	NO	NO	BBB	0	0	0	0
ENSMUSG00000002778	Kdelr1	155.023	158.722	0.9767	1.02386	NO	YES	NO	BAB	0	1	0	1
ENSMUSG00000002781	Tmem143	9.81615	12.6519	0.775864	1.28889	YES	NO	NO	ABB	2	0	0	0
ENSMUSG00000002797	Ggct	4.51754	4.61039	0.97986	1.02055	YES	YES	NO	AAB	1	1	0	1
ENSMUSG00000002803	Btbd6	18.7518	16.6278	1.12774	0.886732	NO	YES	NO	BAB	0	3	0	3
ENSMUSG00000002808	Epdr1	6.2243	7.87455	0.790432	1.26513	NO	YES	NO	BAB	0	1	0	1
ENSMUSG00000002812	Flii	27.039	33.3488	0.810792	1.23336	NO	YES	NO	BAB	0	1	0	1
ENSMUSG00000002814	Top3a	14.0269	17.4552	0.803593	1.24441	NO	NO	NO	BBB	0	0	0	0
ENSMUSG00000002820	Atg4d	20.7199	13.568	1.52712	0.654829	NO	NO	YES	BBA	0	0	1	1
ENSMUSG00000002825	Qtrt1	28.6633	25.4858	1.12467	0.889146	NO	YES	NO	BAB	0	2	0	2
ENSMUSG00000002833	Hdgfrp2	75.8795	82.9108	0.915195	1.09266	NO	NO	NO	BBB	0	0	0	0
ENSMUSG00000002835	Chaf1a	69.0877	84.6123	0.816521	1.22471	NO	YES	NO	BAB	0	1	0	1
ENSMUSG00000002844	Adprh	122.359	198.303	0.617031	1.62066	NO	NO	NO	BBB	0	0	0	0
ENSMUSG00000002845	Tmem39a	72.5151	76.6146	0.946492	1.05653	YES	YES	NO	AAB	1	2	0	2
ENSMUSG00000002846	Timmdc1	25.6502	23.4276	1.09487	0.913349	YES	YES	NO	AAB	1	2	0	2
ENSMUSG00000002870	Mcm2	120.628	151.716	0.795086	1.25773	NO	NO	NO	BBB	0	0	0	0
ENSMUSG00000002881	Nab1	13.6472	7.73304	1.76479	0.566639	YES	YES	YES	AAA	1	2	1	3
ENSMUSG00000002885	Cd97	0.444958	23.4862	0.0189455	52.7829	NO	NO	NO	BBB	0	0	0	0
ENSMUSG00000002897	Il17ra	3.45702	1.66608	2.07495	0.48194	YES	YES	NO	AAB	1	2	0	2
ENSMUSG00000002948	Map2k7	48.2806	39.0402	1.23669	0.808611	NO	YES	NO	BAB	0	1	0	1
ENSMUSG00000002949	Timm44	64.1233	65.4285	0.98005	1.02036	NO	YES	NO	BAB	0	1	0	1
ENSMUSG00000002963	Pnkp	19.2749	21.9649	0.87753	1.13956	NO	YES	NO	BAB	0	2	0	2
ENSMUSG00000002968	Med25	49.3846	57.688	0.856064	1.16814	NO	NO	NO	BBB	0	0	0	0
ENSMUSG00000002980	Bcam	419.176	3.30789	126.72	0.0078914	NO	YES	YES	BAA	0	2	1	3
ENSMUSG00000002981	Clptm1	37.8572	38.5566	0.981861	1.01847	NO	YES	NO	BAB	0	1	0	1
ENSMUSG00000002983	Relb	3.9535	3.19828	1.23613	0.808974	YES	NO	NO	ABB	2	0	0	0
ENSMUSG00000002984	Tomm40	92.4649	87.4038	1.05791	0.945264	NO	YES	YES	BAA	0	1	1	2
ENSMUSG00000002985	Apoe	76.0549	68.4039	1.11185	0.899401	YES	YES	YES	AAA	1	2	1	3
ENSMUSG00000003031	Cdkn1b	36.8907	40.501	0.910859	1.09786	YES	YES	NO	AAB	1	1	0	1
ENSMUSG00000003032	Klf4	31.3055	30.3437	1.0317	0.969278	YES	NO	YES	ABA	2	0	2	2
ENSMUSG00000003033	Ap1m1	43.797	90.7067	0.482842	2.07107	NO	YES	NO	BAB	0	1	0	1
ENSMUSG00000003037	Rab8a	90.8206	85.6929	1.05984	0.94354	NO	NO	NO	BBB	0	0	0	0
ENSMUSG00000003038	Hmgn2	497.259	680.778	0.730428	1.36906	NO	NO	YES	BBA	0	0	3	3
ENSMUSG00000003039	Fam32a	126.705	86.3925	1.46662	0.681839	NO	NO	NO	BBB	0	0	0	0
ENSMUSG00000003068	Stk11	97.4871	78.0337	1.2493	0.800451	NO	YES	NO	BAB	0	1	0	1
ENSMUSG00000003072	Atp5d	354.34	326.305	1.08592	0.920881	NO	YES	NO	BAB	0	2	0	2
ENSMUSG00000003119	Cdk12	41.08	34.7201	1.18318	0.845183	NO	YES	YES	BAA	0	1	1	2
ENSMUSG00000003131	Pafah1b2	130.942	116.782	1.12125	0.891864	NO	NO	NO	BBB	0	0	0	0
ENSMUSG00000003135	Cnot11	53.8927	50.8517	1.0598	0.943574	NO	YES	YES	BAA	0	2	1	3
ENSMUSG00000003161	Sri	104.55	122.009	0.856903	1.16699	NO	NO	YES	BBA	0	0	1	1
ENSMUSG00000003166	Dgcr2	98.2376	102.281	0.960466	1.04116	NO	NO	NO	BBB	0	0	0	0
ENSMUSG00000003184	Irf3	54.3394	53.9018	1.00812	0.991945	NO	NO	NO	BBB	0	0	0	0
ENSMUSG00000003190	Bcl2l12	47.6668	73.2127	0.651072	1.53593	NO	NO	NO	BBB	0	0	0	0
ENSMUSG00000003198	Zfp959	8.15987	8.20177	0.994892	1.00513	NO	NO	NO	BBB	0	0	0	0
ENSMUSG00000003199	Mpnd	112.378	150.732	0.745549	1.34129	NO	YES	YES	BAA	0	2	1	3
ENSMUSG00000003200	Sh3gl1	72.7506	85.8995	0.846927	1.18074	NO	YES	NO	BAB	0	2	0	2
ENSMUSG00000003208	Ccdc94	13.4881	17.2745	0.780813	1.28072	NO	YES	NO	BAB	0	1	0	1
ENSMUSG00000003226	Ranbp2	51.2424	38.5491	1.32928	0.752289	NO	YES	NO	BAB	0	1	0	1
ENSMUSG00000003228	Grk5	4.28027	9.91663	0.431625	2.31683	NO	YES	YES	BAA	0	1	1	2
ENSMUSG00000003233	Dvl3	57.3332	47.6912	1.20218	0.831825	NO	NO	NO	BBB	0	0	0	0
ENSMUSG00000003234	Abcf3	35.483	38.8233	0.91396	1.09414	NO	NO	NO	BBB	0	0	0	0
ENSMUSG00000003235	Eif2b5	76.4403	74.5513	1.02534	0.975287	NO	YES	NO	BAB	0	2	0	2
ENSMUSG00000003269	Cyth2	77.0015	89.7066	0.858371	1.165	NO	YES	NO	BAB	0	3	0	3
ENSMUSG00000003273	Car11	1.65231	3.57439	0.462262	2.16328	NO	NO	YES	BBA	0	0	1	1
ENSMUSG00000003282	Plag1	10.464	9.75101	1.07312	0.931866	YES	NO	NO	ABB	1	0	0	0
ENSMUSG00000003309	Ap1m2	93.6695	0.106356	880.713	0.00113544	YES	NO	NO	ABB	1	0	0	0
ENSMUSG00000003316	Glg1	54.8956	48.1113	1.14101	0.876415	NO	NO	YES	BBA	0	0	1	1
ENSMUSG00000003345	Csnk1g2	174.485	176.497	0.988597	1.01153	NO	YES	NO	BAB	0	3	0	3
ENSMUSG00000003346	Abhd17a	65.7499	88.769	0.740685	1.3501	NO	YES	NO	BAB	0	1	0	1
ENSMUSG00000003348	Mob3a	25.0905	40.7542	0.615653	1.62429	NO	YES	NO	BAB	0	2	0	2
ENSMUSG00000003360	Ddx23	72.6861	84.6046	0.859127	1.16397	NO	YES	NO	BAB	0	1	0	1
ENSMUSG00000003363	Pld3	35.1003	29.636	1.18438	0.844322	YES	NO	YES	ABA	2	0	1	1
ENSMUSG00000003378	Grik5	18.391	23.6573	0.77739	1.28636	NO	NO	YES	BBA	0	0	1	1
ENSMUSG00000003380	Rabac1	38.2101	39.879	0.95815	1.04368	YES	YES	YES	AAA	1	2	1	3
ENSMUSG00000003402	Prkcsh	108.105	86.9716	1.243	0.804508	NO	YES	NO	BAB	0	1	0	1
ENSMUSG00000003411	Rab3b	10.1914	11.282	0.903336	1.10701	YES	YES	YES	AAA	3	1	2	3
ENSMUSG00000003420	Fcgrt	0.19701	7.22508	0.0272676	36.6736	NO	NO	NO	BBB	0	0	0	0
ENSMUSG00000003421	Nosip	68.522	70.927	0.966093	1.0351	NO	YES	NO	BAB	0	1	0	1
ENSMUSG00000003423	Pih1d1	76.9229	82.0518	0.937491	1.06668	NO	NO	NO	BBB	0	0	0	0
ENSMUSG00000003429	Rps11	2036.93	1940.27	1.04982	0.952545	NO	NO	NO	BBB	0	0	0	0
ENSMUSG00000003435	Supt5	76.2943	76.8617	0.992617	1.00744	NO	YES	NO	BAB	0	1	0	1
ENSMUSG00000003437	Paf1	84.1255	76.9488	1.09327	0.914691	NO	NO	NO	BBB	0	0	0	0
ENSMUSG00000003438	Timm50	77.916	92.8057	0.83956	1.1911	NO	NO	NO	BBB	0	0	0	0
ENSMUSG00000003444	Med29	17.4054	17.4973	0.994745	1.00528	NO	YES	NO	BAB	0	1	0	1
ENSMUSG00000003458	Ncstn	77.1228	48.7003	1.58362	0.631464	YES	NO	NO	ABB	1	0	0	0
ENSMUSG00000003464	Pex19	144.809	167.425	0.864917	1.15618	YES	YES	NO	AAB	1	1	0	1
ENSMUSG00000003500	Impdh1	21.1718	24.3034	0.871145	1.14791	YES	YES	YES	AAA	1	2	1	3
ENSMUSG00000003518	Dusp3	1.60651	7.88969	0.203621	4.91108	YES	YES	NO	AAB	1	1	0	1
ENSMUSG00000003526	Prodh	8.13467	7.73513	1.05165	0.950884	YES	NO	NO	ABB	2	0	0	0
ENSMUSG00000003527	Dgcr14	24.3826	28.6541	0.850929	1.17519	NO	YES	NO	BAB	0	1	0	1
ENSMUSG00000003528	Slc25a1	47.6079	50.0202	0.951773	1.05067	YES	NO	NO	ABB	2	0	0	0
ENSMUSG00000003531	Dgcr6	69.7511	96.2779	0.724477	1.38031	YES	YES	NO	AAB	2	2	0	2
ENSMUSG00000003546	Klc4	13.9606	18.8425	0.740914	1.34968	NO	YES	NO	BAB	0	1	0	1
ENSMUSG00000003559	As3mt	9.98055	20.6052	0.48437	2.06454	NO	YES	NO	BAB	0	1	0	1
ENSMUSG00000003573	Homer3	79.0993	97.8951	0.808001	1.23762	NO	NO	NO	BBB	0	0	0	0
ENSMUSG00000003581	Rnf215	23.0621	23.0151	1.00204	0.997964	NO	NO	NO	BBB	0	0	0	0
ENSMUSG00000003585	Sec14l2	1.5384	2.71706	0.566201	1.76616	NO	NO	NO	BBB	0	0	0	0
ENSMUSG00000003604	Aven	23.3473	24.9272	0.936621	1.06767	YES	YES	NO	AAB	2	1	0	1
ENSMUSG00000003660	Snrnp200	85.3427	77.3487	1.10335	0.906331	NO	NO	NO	BBB	0	0	0	0
ENSMUSG00000003662	Ciao1	56.9785	57.6386	0.988546	1.01159	NO	NO	NO	BBB	0	0	0	0
ENSMUSG00000003680	Taf6l	46.1373	43.2404	1.067	0.937211	NO	NO	NO	BBB	0	0	0	0
ENSMUSG00000003721	Insig2	19.8426	14.3972	1.37823	0.725571	NO	YES	YES	BAA	0	1	2	3
ENSMUSG00000003731	Kpna6	30.3875	28.8663	1.0527	0.949942	NO	NO	YES	BBA	0	0	1	1
ENSMUSG00000003752	Itpkc	24.3199	11.6018	2.09622	0.477049	YES	YES	NO	AAB	1	1	0	1
ENSMUSG00000003762	Adck4	16.9349	13.1117	1.29159	0.774239	NO	NO	NO	BBB	0	0	0	0
ENSMUSG00000003778	Brd8	55.7537	70.0307	0.796133	1.25607	NO	NO	NO	BBB	0	0	0	0
ENSMUSG00000003779	Kif20a	91.2567	118.785	0.768254	1.30165	NO	NO	NO	BBB	0	0	0	0
ENSMUSG00000003808	Farsa	68.5158	75.9547	0.90206	1.10857	NO	NO	NO	BBB	0	0	0	0
ENSMUSG00000003809	Gcdh	43.4689	38.4714	1.1299	0.885032	NO	NO	NO	BBB	0	0	0	0
ENSMUSG00000003810	Mast2	38.7765	41.2234	0.940641	1.0631	YES	YES	YES	AAA	1	1	2	3
ENSMUSG00000003812	Dnase2a	22.4107	10.0865	2.22185	0.450076	YES	YES	NO	AAB	2	2	0	2
ENSMUSG00000003813	Rad23a	56.7192	53.0932	1.06829	0.936072	NO	NO	NO	BBB	0	0	0	0
ENSMUSG00000003814	Calr	624.649	762.039	0.819708	1.21995	NO	NO	NO	BBB	0	0	0	0
ENSMUSG00000003824	Syce2	48.1287	69.9562	0.687983	1.45353	YES	NO	NO	ABB	1	0	0	0
ENSMUSG00000003848	Nob1	57.7629	67.2684	0.858693	1.16456	NO	NO	NO	BBB	0	0	0	0
ENSMUSG00000003849	Nqo1	1.97497	12.1126	0.163052	6.13303	YES	YES	NO	AAB	1	2	0	2
ENSMUSG00000003865	Gys1	36.7124	35.4167	1.03658	0.964708	NO	NO	NO	BBB	0	0	0	0
ENSMUSG00000003868	Ruvbl2	106.674	106.444	1.00216	0.997846	YES	YES	NO	AAB	1	2	0	2
ENSMUSG00000003873	Bax	133.174	132.982	1.00145	0.998554	NO	YES	YES	BAA	0	1	1	2
ENSMUSG00000003923	Tfam	100.504	95.7326	1.04984	0.952529	YES	NO	NO	ABB	2	0	0	0
ENSMUSG00000003929	Zfp81	14.0585	12.9198	1.08814	0.919003	NO	NO	NO	BBB	0	0	0	0
ENSMUSG00000003934	Efnb3	20.9212	72.3721	0.289079	3.45927	NO	YES	NO	BAB	0	1	0	1
ENSMUSG00000003948	Mmd	29.7585	71.5721	0.415783	2.4051	NO	YES	YES	BAA	0	1	2	3
ENSMUSG00000003955	Fam162a	229.865	137.132	1.67623	0.596578	NO	NO	NO	BBB	0	0	0	0
ENSMUSG00000003970	Rpl8	2662.42	2457.77	1.08326	0.923136	NO	YES	NO	BAB	0	1	0	1
ENSMUSG00000003992	Ssbp2	85.8496	83.2885	1.03075	0.970167	YES	YES	YES	AAA	1	1	1	2
ENSMUSG00000004018	Fancl	26.1752	24.6308	1.0627	0.940997	NO	NO	YES	BBA	0	0	1	1
ENSMUSG00000004032	Gstm5	138.708	169.528	0.8182	1.2222	NO	YES	YES	BAA	0	1	1	2
ENSMUSG00000004035	Gstm7	19.1836	34.6504	0.553633	1.80625	YES	YES	YES	AAA	1	2	1	3
ENSMUSG00000004044	Ptrf	13.0615	15.634	0.835458	1.19695	NO	NO	NO	BBB	0	0	0	0
ENSMUSG00000004054	Map3k11	28.023	18.7372	1.49558	0.668637	NO	YES	NO	BAB	0	1	0	1
ENSMUSG00000004056	Akt2	57.3621	57.6417	0.99515	1.00487	NO	NO	YES	BBA	0	0	1	1
ENSMUSG00000004069	Dnaja3	36.2974	32.3142	1.12326	0.890263	NO	NO	NO	BBB	0	0	0	0
ENSMUSG00000004070	Hmox2	56.7752	86.9871	0.652685	1.53213	YES	YES	NO	AAB	1	1	0	1
ENSMUSG00000004071	Cdip1	66.4914	68.7158	0.967629	1.03345	YES	YES	NO	AAB	1	1	0	1
ENSMUSG00000004085	Zak	8.74326	5.7202	1.52849	0.654242	NO	NO	NO	BBB	0	0	0	0
ENSMUSG00000004096	Cwc15	154.805	157.782	0.981133	1.01923	YES	YES	NO	AAB	2	1	0	1
ENSMUSG00000004099	Dnmt1	105.155	113.759	0.924367	1.08182	NO	YES	NO	BAB	0	2	0	2
ENSMUSG00000004100	Ppan	56.6729	45.0387	1.25832	0.794713	NO	NO	NO	BBB	0	0	0	0
ENSMUSG00000004113	Cacna1b	15.244	0.619395	24.6111	0.0406321	YES	NO	YES	ABA	2	0	2	2
ENSMUSG00000004127	Trmt10a	17.0832	12.8568	1.32874	0.752594	NO	YES	NO	BAB	0	1	0	1
ENSMUSG00000004151	Etv1	3.96785	9.74715	0.407078	2.45653	YES	YES	YES	AAA	2	2	1	3
ENSMUSG00000004187	Kifc2	2.53925	2.16604	1.1723	0.853022	NO	YES	NO	BAB	0	1	0	1
ENSMUSG00000004207	Psap	234.884	134.9	1.74118	0.574324	YES	YES	YES	AAA	3	1	1	2
ENSMUSG00000004221	Ikbkg	23.8229	17.3225	1.37526	0.727136	YES	NO	NO	ABB	1	0	0	0
ENSMUSG00000004233	Wars2	7.66883	8.21392	0.933639	1.07108	NO	YES	NO	BAB	0	2	0	2
ENSMUSG00000004263	Atn1	62.0766	74.1931	0.83669	1.19519	NO	YES	NO	BAB	0	2	0	2
ENSMUSG00000004264	Phb2	272.888	290.122	0.940597	1.06315	NO	YES	NO	BAB	0	2	0	2
ENSMUSG00000004266	Ptpn6	6.89044	3.13191	2.20008	0.454529	NO	YES	NO	BAB	0	2	0	2
ENSMUSG00000004268	Emg1	174.724	193.311	0.903851	1.10638	YES	YES	NO	AAB	1	2	0	2
ENSMUSG00000004270	Lpcat3	28.802	22.9487	1.25506	0.796773	YES	YES	NO	AAB	1	1	0	1
ENSMUSG00000004285	Atp6v1f	196.569	135.192	1.454	0.68776	NO	YES	NO	BAB	0	1	0	1
ENSMUSG00000004317	Clcn5	19.8363	25.6886	0.772185	1.29503	NO	NO	NO	BBB	0	0	0	0
ENSMUSG00000004319	Clcn3	18.7879	6.3438	2.96161	0.337654	YES	YES	YES	AAA	1	1	2	3
ENSMUSG00000004356	Utp20	15.5612	13.1854	1.18019	0.847323	NO	NO	NO	BBB	0	0	0	0
ENSMUSG00000004364	Cul3	127.809	129.229	0.989012	1.01111	YES	YES	NO	AAB	1	1	0	1
ENSMUSG00000004383	Large	13.3632	21.6495	0.617251	1.62009	NO	NO	NO	BBB	0	0	0	0
ENSMUSG00000004393	Ddx56	51.4478	52.2803	0.984078	1.01618	YES	NO	NO	ABB	1	0	0	0
ENSMUSG00000004394	Tmed4	59.3462	51.3182	1.15644	0.864725	NO	NO	NO	BBB	0	0	0	0
ENSMUSG00000004415	Col26a1	8.67022	334.499	0.02592	38.5803	YES	YES	YES	AAA	1	1	2	3
ENSMUSG00000004446	Bid	19.6686	8.89883	2.21025	0.452439	YES	YES	NO	AAB	1	3	0	3
ENSMUSG00000004451	Ralb	35.111	68.0163	0.516215	1.93718	NO	NO	NO	BBB	0	0	0	0
ENSMUSG00000004455	Ppp1cc	33.6378	37.0811	0.90714	1.10237	NO	NO	NO	BBB	0	0	0	0
ENSMUSG00000004460	Dnajb11	63.9262	64.2618	0.994779	1.00525	NO	YES	NO	BAB	0	1	0	1
ENSMUSG00000004462	Tbccd1	15.1713	16.8662	0.89951	1.11172	YES	NO	NO	ABB	1	0	0	0
ENSMUSG00000004500	Zfp324	7.50799	12.0449	0.623336	1.60427	YES	NO	NO	ABB	1	0	0	0
ENSMUSG00000004508	Gab2	2.93686	6.87927	0.426915	2.34239	NO	YES	YES	BAA	0	1	1	2
ENSMUSG00000004535	Tax1bp1	98.2169	82.7946	1.18627	0.842976	NO	NO	YES	BBA	0	0	3	3
ENSMUSG00000004558	Ndrg2	44.5356	5.82424	7.64658	0.130777	YES	YES	YES	AAA	1	1	1	2
ENSMUSG00000004561	Mettl17	24.3613	18.3952	1.32433	0.755098	NO	NO	YES	BBA	0	0	3	3
ENSMUSG00000004565	Pnpla6	14.2363	7.42012	1.9186	0.521213	YES	NO	YES	ABA	1	0	1	1
ENSMUSG00000004567	Mcoln1	24.1677	28.137	0.858928	1.16424	NO	NO	NO	BBB	0	0	0	0
ENSMUSG00000004568	Arhgef18	20.7452	12.1428	1.70843	0.585332	YES	YES	NO	AAB	3	2	0	2
ENSMUSG00000004591	Pkn2	46.2307	43.8483	1.05433	0.948467	NO	YES	NO	BAB	0	1	0	1
ENSMUSG00000004610	Etfb	138.998	157.125	0.884635	1.13041	NO	NO	NO	BBB	0	0	0	0
ENSMUSG00000004626	Stxbp2	80.3875	11.6959	6.87315	0.145494	NO	YES	NO	BAB	0	1	0	1
ENSMUSG00000004630	Pcp2	0.044397	3.24942	0.0136631	73.19	NO	YES	NO	BAB	0	1	0	1
ENSMUSG00000004631	Sgce	26.2919	30.2379	0.869503	1.15008	YES	NO	NO	ABB	1	0	0	0
ENSMUSG00000004633	Chn2	12.3248	7.5485	1.63275	0.612463	YES	YES	YES	AAA	1	1	1	2
ENSMUSG00000004637	Wwox	8.02238	5.86027	1.36894	0.73049	NO	YES	NO	BAB	0	1	0	1
ENSMUSG00000004642	Slbp	116.229	152.109	0.764117	1.3087	NO	NO	NO	BBB	0	0	0	0
ENSMUSG00000004655	Aqp1	0.393796	8.11407	0.0485325	20.6047	NO	YES	NO	BAB	0	2	0	2
ENSMUSG00000004665	Cnn2	92.8077	194.627	0.476849	2.0971	NO	NO	YES	BBA	0	0	1	1
ENSMUSG00000004677	Myo9b	28.4138	22.7983	1.24632	0.802365	YES	NO	NO	ABB	1	0	0	0
ENSMUSG00000004698	Hdac9	1.29042	2.9256	0.441076	2.26718	YES	NO	NO	ABB	1	0	0	0
ENSMUSG00000004748	Mtfp1	2.53792	5.86691	0.432582	2.3117	NO	YES	NO	BAB	0	3	0	3
ENSMUSG00000004768	Rab23	25.2533	31.0841	0.812419	1.23089	YES	NO	YES	ABA	1	0	1	1
ENSMUSG00000004788	Eif2b2	86.9937	78.3282	1.11063	0.90039	NO	YES	NO	BAB	0	2	0	2
ENSMUSG00000004789	Dlst	92.9677	109.099	0.852144	1.17351	YES	YES	YES	AAA	1	1	1	2
ENSMUSG00000004798	Ulk2	16.5847	28.3011	0.58601	1.70646	NO	NO	YES	BBA	0	0	1	1
ENSMUSG00000004815	Dgkq	12.3651	13.6644	0.904915	1.10508	NO	NO	NO	BBB	0	0	0	0
ENSMUSG00000004837	Grap	0.0402119	5.08252	0.0079118	126.393	YES	YES	NO	AAB	1	3	0	3
ENSMUSG00000004843	Chmp2b	118.387	68.9595	1.71677	0.58249	NO	YES	YES	BAA	0	2	1	3
ENSMUSG00000004846	Plod3	29.3119	34.7586	0.843298	1.18582	NO	NO	NO	BBB	0	0	0	0
ENSMUSG00000004849	Ap1s1	143.364	157.886	0.90802	1.1013	NO	YES	NO	BAB	0	2	0	2
ENSMUSG00000004864	Mapk13	45.1176	1.39819	32.2687	0.0309898	NO	YES	YES	BAA	0	1	2	3
ENSMUSG00000004885	Crabp2	112.723	668.371	0.168654	5.92931	YES	YES	NO	AAB	1	2	0	2
ENSMUSG00000004895	Prcc	82.1394	90.9496	0.90313	1.10726	NO	YES	NO	BAB	0	1	0	1
ENSMUSG00000004896	Rrnad1	15.4477	16.7938	0.919847	1.08714	NO	NO	NO	BBB	0	0	0	0
ENSMUSG00000004897	Hdgf	518.399	339.643	1.5263	0.655177	NO	YES	NO	BAB	0	1	0	1
ENSMUSG00000004929	Thop1	60.9988	68.2719	0.893469	1.11923	NO	YES	YES	BAA	0	2	1	3
ENSMUSG00000004931	Apba3	25.2242	24.1577	1.04415	0.957716	NO	YES	NO	BAB	0	2	0	2
ENSMUSG00000004936	Map2k1	39.7173	50.5803	0.785233	1.27351	NO	NO	NO	BBB	0	0	0	0
ENSMUSG00000004937	Sgta	118.627	138.612	0.855823	1.16847	NO	YES	NO	BAB	0	1	0	1
ENSMUSG00000004945	Tmem242	114.315	131.999	0.866029	1.1547	YES	NO	YES	ABA	1	0	1	1
ENSMUSG00000004947	Dtx2	28.0631	22.2344	1.26215	0.792299	NO	YES	YES	BAA	0	1	2	3
ENSMUSG00000004952	Rasa4	1.21227	2.0889	0.580339	1.72313	YES	YES	NO	AAB	2	2	0	2
ENSMUSG00000004961	Syt5	10.476	0.872835	12.0022	0.0833178	YES	NO	NO	ABB	2	0	0	0
ENSMUSG00000004980	Hnrnpa2b1	1028.57	1159.9	0.886776	1.12768	NO	NO	YES	BBA	0	0	1	1
ENSMUSG00000004994	Ccdc130	12.5634	13.0873	0.959973	1.0417	YES	YES	YES	AAA	1	2	1	3
ENSMUSG00000004996	Mri1	13.2439	18.492	0.716199	1.39626	NO	NO	NO	BBB	0	0	0	0
ENSMUSG00000005034	Prkacb	53.2407	67.889	0.784231	1.27513	NO	NO	YES	BBA	0	0	1	1
ENSMUSG00000005043	Sgsh	5.62074	4.06315	1.38335	0.722885	NO	YES	YES	BAA	0	1	2	3
ENSMUSG00000005054	Cstb	233.739	95.0655	2.45872	0.406716	NO	YES	NO	BAB	0	2	0	2
ENSMUSG00000005069	Pex5	40.895	44.8798	0.911213	1.09744	NO	NO	NO	BBB	0	0	0	0
ENSMUSG00000005078	Jkamp	40.4161	35.6699	1.13306	0.882568	YES	YES	NO	AAB	1	1	0	1
ENSMUSG00000005102	Eif2ak4	17.1098	15.3255	1.11643	0.895715	NO	NO	YES	BBA	0	0	3	3
ENSMUSG00000005142	Man2b1	11.1907	7.76251	1.44163	0.69366	NO	NO	YES	BBA	0	0	1	1
ENSMUSG00000005150	Wdr83	39.6607	40.6098	0.976629	1.02393	NO	NO	NO	BBB	0	0	0	0
ENSMUSG00000005161	Prdx2	1088.07	1205.93	0.902266	1.10832	NO	YES	NO	BAB	0	1	0	1
ENSMUSG00000005198	Polr2a	105.529	111.058	0.950217	1.05239	NO	NO	YES	BBA	0	0	1	1
ENSMUSG00000005204	Senp3	128.662	141.433	0.909705	1.09926	NO	YES	NO	BAB	0	1	0	1
ENSMUSG00000005233	Spc25	85.0895	128.054	0.664479	1.50494	NO	NO	NO	BBB	0	0	0	0
ENSMUSG00000005262	Ufd1l	63.5764	64.674	0.983028	1.01726	NO	NO	NO	BBB	0	0	0	0
ENSMUSG00000005267	Zfp287	5.24154	10.0422	0.521953	1.91588	YES	NO	NO	ABB	3	0	0	0
ENSMUSG00000005299	Letm1	23.7401	24.4154	0.972343	1.02844	NO	YES	YES	BAA	0	1	1	2
ENSMUSG00000005312	Ubqln1	88.3582	87.4196	1.01074	0.989377	NO	YES	YES	BAA	0	1	1	2
ENSMUSG00000005338	Cadm3	2.89711	4.10962	0.704957	1.41853	YES	YES	NO	AAB	1	3	0	3
ENSMUSG00000005357	Slc1a6	1.09686	2.10177	0.521873	1.91618	YES	NO	NO	ABB	2	0	0	0
ENSMUSG00000005362	Crbn	29.656	30.4673	0.973374	1.02735	NO	YES	NO	BAB	0	1	0	1
ENSMUSG00000005370	Msh6	80.9173	74.329	1.08864	0.918579	YES	NO	NO	ABB	2	0	0	0
ENSMUSG00000005371	Fbxo11	66.7156	65.8188	1.01363	0.986558	NO	NO	NO	BBB	0	0	0	0
ENSMUSG00000005373	Mlxipl	1.84113	2.38951	0.770507	1.29785	YES	YES	NO	AAB	1	3	0	3
ENSMUSG00000005374	Tbl2	13.5477	15.6087	0.86796	1.15213	YES	YES	NO	AAB	1	1	0	1
ENSMUSG00000005378	Wbscr22	75.8141	86.7144	0.874296	1.14378	NO	NO	NO	BBB	0	0	0	0
ENSMUSG00000005397	Nid1	1.54117	56.4675	0.0272931	36.6393	YES	YES	NO	AAB	1	1	0	1
ENSMUSG00000005410	Mcm5	115.821	162.617	0.712229	1.40404	NO	NO	NO	BBB	0	0	0	0
ENSMUSG00000005413	Hmox1	11.2596	24.6022	0.457667	2.18499	YES	YES	YES	AAA	2	2	1	3
ENSMUSG00000005442	Cic	81.0316	83.1536	0.97448	1.02619	NO	NO	YES	BBA	0	0	2	2
ENSMUSG00000005447	Pafah1b3	295.144	300.184	0.983208	1.01708	NO	YES	YES	BAA	0	1	2	3
ENSMUSG00000005469	Prkaca	92.5999	139.707	0.662814	1.50872	YES	NO	NO	ABB	1	0	0	0
ENSMUSG00000005470	Asf1b	37.05	48.67	0.761249	1.31363	NO	NO	NO	BBB	0	0	0	0
ENSMUSG00000005501	Usp40	24.0292	25.3328	0.948539	1.05425	NO	NO	NO	BBB	0	0	0	0
ENSMUSG00000005505	Kbtbd4	29.6936	46.5975	0.637235	1.56928	NO	YES	NO	BAB	0	1	0	1
ENSMUSG00000005506	Celf1	112.179	125.329	0.895077	1.11722	NO	YES	YES	BAA	0	2	1	3
ENSMUSG00000005510	Ndufs3	79.855	83.8064	0.952851	1.04948	NO	YES	YES	BAA	0	2	1	3
ENSMUSG00000005534	Insr	15.5068	10.8651	1.42721	0.700667	YES	NO	NO	ABB	1	0	0	0
ENSMUSG00000005566	Trim28	625.051	745.551	0.838374	1.19278	NO	NO	NO	BBB	0	0	0	0
ENSMUSG00000005575	Ube2m	193	230.041	0.838982	1.19192	YES	YES	NO	AAB	1	1	0	1
ENSMUSG00000005583	Mef2c	0.270464	9.50995	0.0284401	35.1616	YES	YES	NO	AAB	2	1	0	1
ENSMUSG00000005609	Ctr9	70.8656	55.1255	1.28553	0.777888	YES	NO	YES	ABA	1	0	2	2
ENSMUSG00000005610	Eif4g2	1111.46	1179.66	0.942185	1.06136	YES	YES	YES	AAA	1	1	2	3
ENSMUSG00000005615	Pcyt1a	20.5799	36.3323	0.566436	1.76542	NO	NO	YES	BBA	0	0	1	1
ENSMUSG00000005621	Zfp592	15.461	19.1783	0.806168	1.24044	NO	NO	NO	BBB	0	0	0	0
ENSMUSG00000005667	Mthfd2	23.0231	52.2182	0.440903	2.26807	YES	NO	YES	ABA	1	0	1	1
ENSMUSG00000005674	Tomm40l	28.6313	30.2619	0.946119	1.05695	NO	YES	NO	BAB	0	1	0	1
ENSMUSG00000005682	Pan2	27.7812	27.0346	1.02762	0.973124	NO	NO	NO	BBB	0	0	0	0
ENSMUSG00000005683	Cs	204.203	196.023	1.04173	0.959941	NO	YES	YES	BAA	0	2	1	3
ENSMUSG00000005698	Ctcf	115.552	118.358	0.976294	1.02428	YES	YES	NO	AAB	1	2	0	2
ENSMUSG00000005699	Pard6a	6.28785	8.27059	0.760267	1.31533	NO	NO	NO	BBB	0	0	0	0
ENSMUSG00000005718	Tfap4	36.9194	35.4652	1.04101	0.960609	YES	YES	NO	AAB	3	3	0	3
ENSMUSG00000005732	Ranbp1	449.894	537.959	0.836298	1.19575	NO	NO	NO	BBB	0	0	0	0
ENSMUSG00000005774	Rfx5	15.3369	15.142	1.01287	0.987297	NO	YES	NO	BAB	0	1	0	1
ENSMUSG00000005779	Psmb4	358.169	435.963	0.821558	1.2172	NO	YES	YES	BAA	0	2	1	3
ENSMUSG00000005803	Sqrdl	1.78946	2.18987	0.817153	1.22376	NO	NO	NO	BBB	0	0	0	0
ENSMUSG00000005804	Bloc1s6	57.4642	52.4105	1.09643	0.912054	YES	NO	YES	ABA	1	0	2	2
ENSMUSG00000005813	Metap1	41.071	40.6809	1.00959	0.990501	NO	NO	NO	BBB	0	0	0	0
ENSMUSG00000005823	Gpr108	14.5368	14.9077	0.975118	1.02552	NO	NO	NO	BBB	0	0	0	0
ENSMUSG00000005846	Rsl1d1	196.467	197.149	0.996542	1.00347	NO	NO	YES	BBA	0	0	1	1
ENSMUSG00000005873	Reep5	44.0755	54.0998	0.814707	1.22743	NO	NO	YES	BBA	0	0	3	3
ENSMUSG00000005881	Ergic3	125.337	122.231	1.02541	0.975222	NO	YES	NO	BAB	0	1	0	1
ENSMUSG00000005882	Uqcc1	46.3369	44.7339	1.03583	0.965405	NO	YES	YES	BAA	0	1	1	2
ENSMUSG00000005883	Spo11	3.7555	0.0644057	58.31	0.0171497	NO	YES	NO	BAB	0	3	0	3
ENSMUSG00000005899	Smpd4	65.7468	68.5379	0.959277	1.04245	NO	YES	NO	BAB	0	1	0	1
ENSMUSG00000005907	Pex1	7.24167	8.32675	0.869687	1.14984	NO	NO	NO	BBB	0	0	0	0
ENSMUSG00000005936	Kctd20	95.8607	109.289	0.877127	1.14009	NO	NO	YES	BBA	0	0	1	1
ENSMUSG00000005949	Ctns	12.4916	14.4797	0.8627	1.15915	NO	NO	NO	BBB	0	0	0	0
ENSMUSG00000005968	Tuft1	15.8355	2.39455	6.61316	0.151214	YES	YES	YES	AAA	2	1	1	2
ENSMUSG00000005981	Trap1	62.558	70.0841	0.892613	1.12031	NO	NO	NO	BBB	0	0	0	0
ENSMUSG00000005982	Naa60	47.4979	58.8795	0.806697	1.23962	NO	NO	NO	BBB	0	0	0	0
ENSMUSG00000005983	1700037C18Rik	4.74914	5.5096	0.861977	1.16012	NO	NO	NO	BBB	0	0	0	0
ENSMUSG00000005986	Ankrd13d	5.96846	5.07118	1.17694	0.849663	YES	YES	NO	AAB	1	2	0	2
ENSMUSG00000006005	Tpr	117.828	115.227	1.02257	0.977926	NO	NO	YES	BBA	0	0	1	1
ENSMUSG00000006010	BC003331	21.3523	21.8365	0.977826	1.02268	NO	YES	NO	BAB	0	1	0	1
ENSMUSG00000006019	Dhx34	11.9737	10.5504	1.13491	0.881129	NO	YES	NO	BAB	0	2	0	2
ENSMUSG00000006021	Kptn	14.7685	18.917	0.780703	1.2809	NO	YES	NO	BAB	0	1	0	1
ENSMUSG00000006024	Napa	78.4453	83.3271	0.941415	1.06223	NO	YES	NO	BAB	0	1	0	1
ENSMUSG00000006050	Sra1	85.9791	82.0402	1.04801	0.954187	NO	NO	NO	BBB	0	0	0	0
ENSMUSG00000006058	Snf8	55.9012	51.2089	1.09163	0.916062	NO	NO	YES	BBA	0	0	1	1
ENSMUSG00000006095	Tbcb	104.79	149.166	0.702505	1.42348	NO	NO	NO	BBB	0	0	0	0
ENSMUSG00000006127	Inpp5k	15.6705	10.5142	1.49042	0.670951	NO	NO	NO	BBB	0	0	0	0
ENSMUSG00000006134	Crkl	53.2766	57.2021	0.931374	1.07368	NO	NO	NO	BBB	0	0	0	0
ENSMUSG00000006169	Clint1	81.1151	82.1115	0.987865	1.01228	YES	YES	YES	AAA	3	1	2	3
ENSMUSG00000006235	Epor	0.5349	4.4187	0.121054	8.2608	NO	YES	NO	BAB	0	1	0	1
ENSMUSG00000006273	Atp6v1b2	69.2877	66.0109	1.04964	0.952707	YES	NO	NO	ABB	1	0	0	0
ENSMUSG00000006276	Eps15l1	42.8183	42.8164	1.00004	0.999956	YES	YES	NO	AAB	1	2	0	2
ENSMUSG00000006281	Tep1	4.11555	1.84071	2.23585	0.447256	YES	NO	NO	ABB	1	0	0	0
ENSMUSG00000006288	Ttc5	50.7425	44.3101	1.14517	0.873234	NO	NO	NO	BBB	0	0	0	0
ENSMUSG00000006289	Osgep	102.699	102.397	1.00295	0.997057	NO	NO	NO	BBB	0	0	0	0
ENSMUSG00000006299	Aamp	180.094	145.42	1.23844	0.807469	NO	YES	NO	BAB	0	1	0	1
ENSMUSG00000006301	Tmbim1	12.6771	7.36979	1.72015	0.581345	YES	YES	NO	AAB	1	2	0	2
ENSMUSG00000006304	Arpc2	307.681	227.814	1.35058	0.740423	NO	YES	YES	BAA	0	1	1	2
ENSMUSG00000006307	Kmt2b	36.5829	31.4321	1.16387	0.859201	NO	NO	NO	BBB	0	0	0	0
ENSMUSG00000006315	Tmem147	66.8147	66.9907	0.997373	1.00263	YES	NO	NO	ABB	1	0	0	0
ENSMUSG00000006333	Rps9	2303.11	2040.71	1.12858	0.88607	NO	NO	NO	BBB	0	0	0	0
ENSMUSG00000006335	Tfpt	24.0926	27.9574	0.861761	1.16041	NO	NO	NO	BBB	0	0	0	0
ENSMUSG00000006345	Ggt1	3.72817	0.276599	13.4786	0.0741917	NO	NO	NO	BBB	0	0	0	0
ENSMUSG00000006360	Crip1	8.57416	32.4036	0.264605	3.77922	NO	YES	YES	BAA	0	1	2	3
ENSMUSG00000006373	Pgrmc1	282.436	289.121	0.976879	1.02367	NO	YES	YES	BAA	0	1	1	2
ENSMUSG00000006378	Gcat	70.3335	44.6484	1.57528	0.63481	NO	NO	NO	BBB	0	0	0	0
ENSMUSG00000006386	Tek	0.470936	7.19286	0.0654728	15.2735	NO	YES	NO	BAB	0	1	0	1
ENSMUSG00000006390	Elovl1	37.5916	26.6923	1.40833	0.710061	YES	NO	NO	ABB	1	0	0	0
ENSMUSG00000006392	Med8	104.381	95.4227	1.09388	0.914178	NO	NO	NO	BBB	0	0	0	0
ENSMUSG00000006395	Hyi	4.30297	6.97131	0.617239	1.62012	NO	NO	NO	BBB	0	0	0	0
ENSMUSG00000006398	Cdc20	133.764	195.304	0.6849	1.46007	YES	NO	NO	ABB	1	0	0	0
ENSMUSG00000006403	Adamts4	1.43517	7.85661	0.18267	5.47435	YES	YES	NO	AAB	1	2	0	2
ENSMUSG00000006411	Pvrl4	79.2716	0.0678967	1167.53	0.000856508	NO	NO	NO	BBB	0	0	0	0
ENSMUSG00000006412	Pfdn2	130.445	116.4	1.12066	0.89233	NO	YES	NO	BAB	0	1	0	1
ENSMUSG00000006418	Rnf114	124.733	100.676	1.23895	0.807136	YES	YES	NO	AAB	1	1	0	1
ENSMUSG00000006423	C330007P06Rik	35.8078	35.8333	0.999287	1.00071	YES	YES	YES	AAA	3	1	1	2
ENSMUSG00000006442	Srm	88.1897	112.954	0.780758	1.28081	NO	YES	NO	BAB	0	1	0	1
ENSMUSG00000006456	Rbm14	64.5855	73.2456	0.881765	1.13409	NO	YES	YES	BAA	0	1	1	2
ENSMUSG00000006463	Zdhhc24	8.94348	5.4103	1.65305	0.604943	NO	NO	NO	BBB	0	0	0	0
ENSMUSG00000006464	Bbs1	5.05097	7.07332	0.714088	1.40039	NO	NO	NO	BBB	0	0	0	0
ENSMUSG00000006471	Ndor1	25.2935	18.1513	1.39348	0.717626	NO	NO	NO	BBB	0	0	0	0
ENSMUSG00000006476	Nsmf	27.8756	43.2341	0.644759	1.55097	NO	NO	YES	BBA	0	0	1	1
ENSMUSG00000006498	Ptbp1	511.635	459.823	1.11268	0.898732	YES	YES	YES	AAA	2	1	2	3
ENSMUSG00000006517	Mvd	24.9946	39.0448	0.640152	1.56213	NO	NO	YES	BBA	0	0	1	1
ENSMUSG00000006519	Cyba	29.2253	25.495	1.14632	0.87236	YES	NO	NO	ABB	1	0	0	0
ENSMUSG00000006526	Tmem110	26.4768	25.9498	1.02031	0.980096	NO	YES	NO	BAB	0	1	0	1
ENSMUSG00000006527	Sfmbt1	8.54583	14.6374	0.583834	1.71281	YES	NO	NO	ABB	1	0	0	0
ENSMUSG00000006574	Slc4a1	0.585154	25.5914	0.0228653	43.7344	NO	YES	NO	BAB	0	1	0	1
ENSMUSG00000006575	Rundc3a	1.45879	1.80278	0.809188	1.23581	YES	YES	NO	AAB	1	3	0	3
ENSMUSG00000006586	Runx1t1	0.643435	24.2217	0.0265644	37.6444	YES	YES	NO	AAB	3	1	0	1
ENSMUSG00000006589	Aprt	205.29	156.695	1.31013	0.763286	NO	YES	YES	BAA	0	1	1	2
ENSMUSG00000006599	Gtf2h1	40.38	43.1912	0.934913	1.06962	NO	YES	NO	BAB	0	1	0	1
ENSMUSG00000006641	Slc5a6	7.70298	7.31869	1.05251	0.950111	YES	NO	YES	ABA	1	0	1	1
ENSMUSG00000006673	Qrich1	110.612	116.808	0.946953	1.05602	NO	NO	NO	BBB	0	0	0	0
ENSMUSG00000006675	P4htm	2.88827	4.06285	0.710897	1.40667	YES	NO	YES	ABA	1	0	2	2
ENSMUSG00000006676	Usp19	89.0509	76.378	1.16592	0.857689	NO	NO	NO	BBB	0	0	0	0
ENSMUSG00000006678	Pola1	26.4169	27.5269	0.959674	1.04202	NO	NO	NO	BBB	0	0	0	0
ENSMUSG00000006715	Gmnn	94.9569	95.7449	0.99177	1.0083	YES	YES	YES	AAA	2	1	2	3
ENSMUSG00000006717	Acot13	48.0453	48.1158	0.998535	1.00147	NO	NO	NO	BBB	0	0	0	0
ENSMUSG00000006728	Cdk4	1965.92	2241.91	0.876896	1.14039	NO	YES	NO	BAB	0	1	0	1
ENSMUSG00000006731	B4galnt1	5.76564	2.7673	2.08349	0.479963	NO	YES	NO	BAB	0	3	0	3
ENSMUSG00000006732	Mettl1	35.0879	33.5348	1.04631	0.955738	NO	NO	NO	BBB	0	0	0	0
ENSMUSG00000006736	Tspan31	109.921	115.147	0.954614	1.04754	NO	NO	NO	BBB	0	0	0	0
ENSMUSG00000006763	Saal1	22.2146	32.0759	0.692563	1.44391	NO	YES	NO	BAB	0	1	0	1
ENSMUSG00000006782	Cnp	10.8521	16.6472	0.651887	1.53401	NO	YES	YES	BAA	0	2	1	3
ENSMUSG00000006818	Sod2	21.921	18.843	1.16335	0.859583	NO	NO	YES	BBA	0	0	1	1
ENSMUSG00000006850	Tmco6	15.2311	13.8139	1.10259	0.906953	NO	NO	YES	BBA	0	0	1	1
ENSMUSG00000006906	Stambp	12.9195	10.6068	1.21804	0.820994	YES	NO	NO	ABB	1	0	0	0
ENSMUSG00000006920	Ezh1	9.21636	9.00091	1.02394	0.976623	NO	YES	NO	BAB	0	3	0	3
ENSMUSG00000006931	Leprel4	16.8569	24.7691	0.680563	1.46937	NO	NO	NO	BBB	0	0	0	0
ENSMUSG00000006958	Chrd	0.860069	2.43843	0.352714	2.83516	YES	YES	YES	AAA	1	1	1	2
ENSMUSG00000006998	Psmd2	222.404	233.432	0.952757	1.04959	YES	NO	NO	ABB	1	0	0	0
ENSMUSG00000007029	Vars	123.122	125.694	0.979536	1.02089	NO	NO	NO	BBB	0	0	0	0
ENSMUSG00000007035	Msh5	1.42506	2.04015	0.698508	1.43162	YES	YES	NO	AAB	1	1	0	1
ENSMUSG00000007036	Abhd16a	30.7534	34.2116	0.898915	1.11245	NO	NO	NO	BBB	0	0	0	0
ENSMUSG00000007038	Neu1	10.3796	8.49996	1.22114	0.818907	NO	YES	NO	BAB	0	1	0	1
ENSMUSG00000007039	Ddah2	294.561	395.088	0.745558	1.34128	NO	YES	NO	BAB	0	1	0	1
ENSMUSG00000007041	Clic1	165.567	154.402	1.07232	0.932561	YES	YES	NO	AAB	1	1	0	1
ENSMUSG00000007050	Lsm2	133.937	148.67	0.900903	1.11	NO	YES	NO	BAB	0	1	0	1
ENSMUSG00000007080	Pole	25.4454	34.5618	0.736229	1.35827	NO	YES	NO	BAB	0	1	0	1
ENSMUSG00000007216	Zfp775	4.14221	7.54637	0.548901	1.82182	NO	YES	NO	BAB	0	1	0	1
ENSMUSG00000007338	Mrpl49	67.4086	67.3311	1.00115	0.998849	NO	NO	NO	BBB	0	0	0	0
ENSMUSG00000007411	Mark3	56.431	65.2405	0.864969	1.15611	NO	YES	NO	BAB	0	3	0	3
ENSMUSG00000007415	Gatad1	59.5847	67.0599	0.888529	1.12546	NO	NO	NO	BBB	0	0	0	0
ENSMUSG00000007458	M6pr	76.4004	48.3883	1.5789	0.633351	YES	NO	YES	ABA	1	0	1	1
ENSMUSG00000007476	Lrrc8a	19.1197	24.4866	0.780825	1.2807	NO	NO	NO	BBB	0	0	0	0
ENSMUSG00000007564	Ppp2r1a	283.494	254.104	1.11566	0.896328	NO	NO	NO	BBB	0	0	0	0
ENSMUSG00000007589	Tinf2	31.0149	34.8288	0.890496	1.12297	NO	NO	NO	BBB	0	0	0	0
ENSMUSG00000007603	Dus3l	25.5842	21.6755	1.18033	0.847222	NO	YES	NO	BAB	0	2	0	2
ENSMUSG00000007610	Gtpbp3	23.233	32.2141	0.721207	1.38657	YES	YES	NO	AAB	2	1	0	1
ENSMUSG00000007617	Homer1	25.0846	23.3498	1.0743	0.930843	NO	NO	YES	BBA	0	0	3	3
ENSMUSG00000007646	Rad51c	12.1004	12.2256	0.989765	1.01034	NO	NO	NO	BBB	0	0	0	0
ENSMUSG00000007655	Cav1	11.0414	11.426	0.966339	1.03483	YES	YES	YES	AAA	1	1	2	3
ENSMUSG00000007670	Khsrp	95.646	99.8511	0.957886	1.04397	NO	NO	NO	BBB	0	0	0	0
ENSMUSG00000007739	Cct4	336.596	338.109	0.995527	1.00449	NO	NO	NO	BBB	0	0	0	0
ENSMUSG00000007783	Cpt1c	5.34445	10.1993	0.524003	1.90839	YES	YES	YES	AAA	1	1	1	2
ENSMUSG00000007805	Twist2	0.663311	95.3872	0.00695388	143.805	YES	YES	NO	AAB	1	1	0	1
ENSMUSG00000007812	Zfp655	22.3337	17.596	1.26925	0.787868	NO	NO	YES	BBA	0	0	1	1
ENSMUSG00000007815	Rhoa	245.419	260.697	0.941396	1.06225	NO	NO	NO	BBB	0	0	0	0
ENSMUSG00000007827	Ankrd26	8.95526	9.56665	0.936092	1.06827	YES	NO	YES	ABA	2	0	1	1
ENSMUSG00000007833	Aldh16a1	53.6903	46.3109	1.15935	0.862556	NO	NO	NO	BBB	0	0	0	0
ENSMUSG00000007836	Hnrnpa0	528.321	555.46	0.951142	1.05137	YES	YES	NO	AAB	1	1	0	1
ENSMUSG00000007850	Hnrnph1	832.982	980.689	0.849384	1.17732	YES	YES	YES	AAA	2	1	2	3
ENSMUSG00000007867	Ift43	39.3591	31.172	1.26265	0.791988	NO	YES	YES	BAA	0	1	1	2
ENSMUSG00000007891	Ctsd	140.146	98.9863	1.41581	0.706308	NO	YES	NO	BAB	0	1	0	1
ENSMUSG00000007908	Hmgcll1	2.94399	2.04872	1.43699	0.6959	NO	YES	YES	BAA	0	1	2	3
ENSMUSG00000007950	Abhd8	33.6662	59.3671	0.567086	1.7634	NO	YES	YES	BAA	0	1	2	3
ENSMUSG00000007987	Ift22	31.2534	32.9378	0.948863	1.05389	YES	NO	NO	ABB	1	0	0	0
ENSMUSG00000008035	Mid1ip1	17.2866	14.4839	1.1935	0.83787	NO	YES	NO	BAB	0	1	0	1
ENSMUSG00000008036	Ap2s1	187.802	228.242	0.82282	1.21533	YES	YES	YES	AAA	1	1	1	2
ENSMUSG00000008090	Fgfrl1	11.3598	41.0925	0.276444	3.61736	NO	YES	YES	BAA	0	1	2	3
ENSMUSG00000008136	Fhl2	5.3428	9.09243	0.58761	1.70181	YES	NO	YES	ABA	1	0	1	1
ENSMUSG00000008140	Emc10	95.7807	96.3622	0.993965	1.00607	YES	NO	NO	ABB	1	0	0	0
ENSMUSG00000008153	Clstn3	7.46837	5.91524	1.26256	0.792039	YES	NO	NO	ABB	2	0	0	0
ENSMUSG00000008167	Fbxw9	23.1746	17.2216	1.34567	0.743122	NO	NO	NO	BBB	0	0	0	0
ENSMUSG00000008200	Fnbp4	59.7621	58.8886	1.01483	0.985384	NO	NO	YES	BBA	0	0	1	1
ENSMUSG00000008301	Phax	90.4816	85.6148	1.05685	0.946212	NO	NO	NO	BBB	0	0	0	0
ENSMUSG00000008333	Snrpb2	112.689	148.173	0.760525	1.31488	NO	NO	NO	BBB	0	0	0	0
ENSMUSG00000008348	Ubc	122.968	98.3539	1.25027	0.79983	NO	YES	NO	BAB	0	2	0	2
ENSMUSG00000008373	Prpf31	109.655	118.507	0.925305	1.08072	NO	NO	NO	BBB	0	0	0	0
ENSMUSG00000008384	Sertad1	19.832	23.1613	0.856254	1.16788	YES	YES	YES	AAA	2	2	1	3
ENSMUSG00000008393	Carhsp1	88.5778	99.1339	0.893516	1.11917	YES	YES	YES	AAA	1	1	2	3
ENSMUSG00000008429	Herpud2	21.8624	18.1606	1.20384	0.830679	NO	NO	YES	BBA	0	0	1	1
ENSMUSG00000008435	Rdh13	22.7568	23.8923	0.952475	1.0499	YES	NO	YES	ABA	1	0	1	1
ENSMUSG00000008450	Nutf2	31.1921	33.7891	0.92314	1.08326	NO	YES	NO	BAB	0	1	0	1
ENSMUSG00000008475	Arpc5	100.893	85.9658	1.17364	0.852046	YES	YES	NO	AAB	1	1	0	1
ENSMUSG00000008489	Elavl2	5.38419	4.50758	1.19448	0.837187	YES	YES	YES	AAA	2	2	1	3
ENSMUSG00000008540	Mgst1	122.495	32.5296	3.76564	0.265559	NO	NO	NO	BBB	0	0	0	0
ENSMUSG00000008604	Ubqln4	91.9532	93.7021	0.981336	1.01902	NO	NO	NO	BBB	0	0	0	0
ENSMUSG00000008668	Rps18	1871.51	1621.04	1.15451	0.86617	NO	NO	NO	BBB	0	0	0	0
ENSMUSG00000008682	Rpl10	60.4416	66.477	0.909211	1.09986	NO	NO	NO	BBB	0	0	0	0
ENSMUSG00000008683	Rps15a	4191.77	3526.81	1.18854	0.841365	NO	YES	NO	BAB	0	1	0	1
ENSMUSG00000008690	Ncaph2	128.526	115.324	1.11448	0.897281	NO	NO	NO	BBB	0	0	0	0
ENSMUSG00000008730	Hipk1	31.0617	29.7081	1.04557	0.95642	NO	NO	NO	BBB	0	0	0	0
ENSMUSG00000008822	Acyp1	37.4798	24.4668	1.53186	0.652799	NO	NO	NO	BBB	0	0	0	0
ENSMUSG00000008859	Rala	69.8972	70.4454	0.992218	1.00784	NO	NO	YES	BBA	0	0	3	3
ENSMUSG00000008892	Vdac3	86.2967	84.9745	1.01556	0.984679	NO	YES	YES	BAA	0	2	1	3
ENSMUSG00000008958	Vps72	172.56	201.923	0.854582	1.17016	NO	NO	NO	BBB	0	0	0	0
ENSMUSG00000008976	Gabpa	56.0926	49.5393	1.13228	0.88317	NO	YES	YES	BAA	0	1	1	2
ENSMUSG00000009013	Dynll1	760.776	975.871	0.779587	1.28273	NO	YES	YES	BAA	0	2	1	3
ENSMUSG00000009030	Pdcl	59.7982	47.713	1.25329	0.7979	NO	YES	NO	BAB	0	1	0	1
ENSMUSG00000009073	Nf2	60.3937	77.3863	0.780419	1.28136	NO	YES	YES	BAA	0	1	2	3
ENSMUSG00000009076	Zmat5	33.2968	43.9179	0.758159	1.31898	NO	YES	NO	BAB	0	3	0	3
ENSMUSG00000009079	Ewsr1	442.4	523.512	0.845062	1.18334	YES	YES	YES	AAA	1	2	1	3
ENSMUSG00000009090	Ap1b1	39.2169	36.301	1.08033	0.925647	NO	YES	YES	BAA	0	2	1	3
ENSMUSG00000009112	Bcl2l13	38.5079	36.4736	1.05577	0.947172	NO	YES	NO	BAB	0	2	0	2
ENSMUSG00000009207	Lnp	15.2132	22.2715	0.683079	1.46396	NO	NO	NO	BBB	0	0	0	0
ENSMUSG00000009291	Pttg1ip	75.5711	56.3204	1.34181	0.745264	YES	YES	YES	AAA	1	1	2	3
ENSMUSG00000009293	Ube2g2	52.8986	59.1136	0.894862	1.11749	YES	YES	YES	AAA	1	2	1	3
ENSMUSG00000009406	Elk1	21.5953	26.657	0.810116	1.23439	NO	NO	YES	BBA	0	0	1	1
ENSMUSG00000009470	Tnpo1	89.8271	82.2943	1.09153	0.916142	YES	YES	YES	AAA	2	1	1	2
ENSMUSG00000009535	Rnmt	52.041	42.5845	1.22206	0.818288	NO	NO	NO	BBB	0	0	0	0
ENSMUSG00000009555	Cdk9	103.035	96.6466	1.0661	0.937994	NO	NO	YES	BBA	0	0	1	1
ENSMUSG00000009563	Tor2a	31.2769	39.1494	0.798912	1.2517	YES	YES	NO	AAB	1	1	0	1
ENSMUSG00000009569	Mkl2	20.9211	14.8012	1.41347	0.707476	YES	YES	YES	AAA	1	2	1	3
ENSMUSG00000009628	Tex15	3.54218	1.77352	1.99726	0.500686	YES	NO	YES	ABA	1	0	2	2
ENSMUSG00000009630	Ppp2cb	143.039	102.656	1.39338	0.717682	NO	YES	YES	BAA	0	2	1	3
ENSMUSG00000009633	G0s2	3.36145	9.45686	0.355451	2.81333	YES	YES	NO	AAB	2	3	0	3
ENSMUSG00000009647	Mcu	13.9274	13.9762	0.996508	1.0035	NO	YES	NO	BAB	0	1	0	1
ENSMUSG00000009654	Oit3	5.0578	0.327624	15.4378	0.064776	NO	YES	YES	BAA	0	1	2	3
ENSMUSG00000009687	Fxyd5	0.333455	8.02856	0.0415337	24.0769	NO	YES	NO	BAB	0	3	0	3
ENSMUSG00000009733	Tfcp2	17.0149	18.8007	0.905016	1.10495	NO	NO	NO	BBB	0	0	0	0
ENSMUSG00000009739	Pou6f1	7.63679	8.76988	0.870798	1.14837	NO	YES	NO	BAB	0	2	0	2
ENSMUSG00000009741	Ubp1	59.2828	54.4506	1.08874	0.918489	YES	NO	YES	ABA	1	0	2	2
ENSMUSG00000009828	Ick	31.6704	47.8122	0.662391	1.50968	NO	YES	NO	BAB	0	1	0	1
ENSMUSG00000009905	Kdsr	7.89755	5.71251	1.3825	0.723327	NO	NO	NO	BBB	0	0	0	0
ENSMUSG00000009907	Vps4b	78.9137	55.3603	1.42546	0.701529	NO	NO	NO	BBB	0	0	0	0
ENSMUSG00000009927	Rps25	323.918	250.367	1.29377	0.772933	NO	NO	NO	BBB	0	0	0	0
ENSMUSG00000009995	Taz	43.1647	34.6548	1.24556	0.80285	NO	NO	NO	BBB	0	0	0	0
ENSMUSG00000010047	Hyal2	141.327	109.268	1.2934	0.773157	NO	YES	NO	BAB	0	1	0	1
ENSMUSG00000010051	Hyal1	18.1863	4.56695	3.98215	0.251121	NO	NO	YES	BBA	0	0	1	1
ENSMUSG00000010054	Tusc2	40.3054	39.6983	1.01529	0.984936	NO	NO	YES	BBA	0	0	1	1
ENSMUSG00000010057	Nprl2	21.4154	21.7843	0.983067	1.01722	NO	NO	NO	BBB	0	0	0	0
ENSMUSG00000010080	Epn3	17.7929	0.972973	18.2872	0.0546832	NO	YES	YES	BAA	0	2	1	3
ENSMUSG00000010097	Nxf1	231.307	282.303	0.819358	1.22047	NO	NO	NO	BBB	0	0	0	0
ENSMUSG00000010110	Stx5a	79.6015	80.9364	0.983508	1.01677	NO	NO	NO	BBB	0	0	0	0
ENSMUSG00000010205	Raver1	93.9576	108.215	0.868248	1.15175	NO	NO	YES	BBA	0	0	1	1
ENSMUSG00000010277	2610507B11Rik	79.6396	60.4371	1.31773	0.758883	NO	YES	NO	BAB	0	1	0	1
ENSMUSG00000010290	AI597479	29.12	30.7347	0.947462	1.05545	YES	NO	NO	ABB	1	0	0	0
ENSMUSG00000010307	Tmem86a	5.50984	8.97938	0.61361	1.6297	YES	YES	NO	AAB	1	3	0	3
ENSMUSG00000010376	Nedd8	415.884	427.877	0.971971	1.02884	NO	NO	NO	BBB	0	0	0	0
ENSMUSG00000010406	Mrpl52	232.171	199.421	1.16423	0.85894	NO	NO	NO	BBB	0	0	0	0
ENSMUSG00000010453	Kansl3	46.0163	39.7926	1.1564	0.864749	NO	YES	NO	BAB	0	2	0	2
ENSMUSG00000010461	Eya4	3.04752	29.214	0.104317	9.58617	NO	NO	NO	BBB	0	0	0	0
ENSMUSG00000010517	Faf1	36.7252	26.6297	1.3791	0.725108	NO	NO	YES	BBA	0	0	1	1
ENSMUSG00000010538	Tsacc	6.0283	4.31914	1.39572	0.716478	NO	NO	NO	BBB	0	0	0	0
ENSMUSG00000010554	Mettl16	33.8066	34.1623	0.989589	1.01052	NO	NO	YES	BBA	0	0	2	2
ENSMUSG00000010607	Pigyl	25.9321	38.9386	0.665973	1.50156	YES	YES	NO	AAB	2	1	0	1
ENSMUSG00000010608	Rbm25	117.012	112.755	1.03776	0.963615	NO	NO	NO	BBB	0	0	0	0
ENSMUSG00000010660	Plcd1	33.3901	7.30084	4.57346	0.218653	YES	YES	YES	AAA	1	2	1	3
ENSMUSG00000010663	Fads1	70.2938	99.992	0.702994	1.42249	NO	YES	YES	BAA	0	1	1	2
ENSMUSG00000010721	Lmbr1	5.62703	3.34931	1.68006	0.595218	YES	NO	YES	ABA	1	0	1	1
ENSMUSG00000010751	Tnfrsf22	4.79895	9.19833	0.521719	1.91674	NO	NO	YES	BBA	0	0	1	1
ENSMUSG00000010755	Cars	25.6033	30.4255	0.841506	1.18835	NO	YES	YES	BAA	0	1	2	3
ENSMUSG00000010803	Gabra1	1.47976	1.73153	0.854596	1.17014	YES	NO	YES	ABA	1	0	1	1
ENSMUSG00000010830	Kdelr3	8.76253	6.49942	1.3482	0.741729	NO	YES	NO	BAB	0	3	0	3
ENSMUSG00000010914	Pdhx	21.7249	33.2739	0.652913	1.5316	NO	YES	NO	BAB	0	1	0	1
ENSMUSG00000011096	Akt1s1	83.9396	80.0293	1.04886	0.953414	NO	NO	NO	BBB	0	0	0	0
ENSMUSG00000011114	Tbrg1	110.95	91.582	1.21149	0.825431	NO	NO	NO	BBB	0	0	0	0
ENSMUSG00000011158	Brf1	29.8317	32.8362	0.908499	1.10072	NO	NO	NO	BBB	0	0	0	0
ENSMUSG00000011254	Thg1l	20.6829	23.2168	0.890858	1.12251	NO	NO	NO	BBB	0	0	0	0
ENSMUSG00000011256	Adam19	3.29587	23.4349	0.140639	7.1104	NO	YES	NO	BAB	0	1	0	1
ENSMUSG00000011257	Pabpc4	77.6242	89.409	0.868192	1.15182	YES	YES	NO	AAB	2	1	0	1
ENSMUSG00000011306	Sugp1	35.5704	32.8496	1.08283	0.923509	NO	NO	NO	BBB	0	0	0	0
ENSMUSG00000011382	Dhdh	1.77298	2.81883	0.62898	1.58988	YES	NO	NO	ABB	1	0	0	0
ENSMUSG00000011427	Zfp790	9.54394	11.4164	0.835984	1.1962	NO	NO	NO	BBB	0	0	0	0
ENSMUSG00000011589	Fsd1	19.4665	18.1006	1.07547	0.92983	YES	YES	NO	AAB	1	1	0	1
ENSMUSG00000011658	Fuz	10.6499	12.0146	0.886415	1.12814	NO	YES	NO	BAB	0	2	0	2
ENSMUSG00000011752	Pgam1	105.869	52.2769	2.02515	0.49379	NO	NO	NO	BBB	0	0	0	0
ENSMUSG00000011831	Evi5	20.9516	39.5112	0.530271	1.88583	NO	NO	NO	BBB	0	0	0	0
ENSMUSG00000011832	Evi5l	16.6837	23.402	0.712918	1.40269	YES	YES	YES	AAA	2	2	1	3
ENSMUSG00000011837	Snapc2	46.4752	57.3529	0.810339	1.23405	NO	YES	YES	BAA	0	1	1	2
ENSMUSG00000011958	Bnip2	78.7537	79.4409	0.991351	1.00872	NO	NO	YES	BBA	0	0	2	2
ENSMUSG00000011960	Ccnt1	22.8134	21.0386	1.08436	0.922204	NO	NO	NO	BBB	0	0	0	0
ENSMUSG00000012076	Brms1l	26.0892	44.9866	0.579933	1.72434	NO	NO	YES	BBA	0	0	1	1
ENSMUSG00000012114	Med15	30.1783	26.9562	1.11953	0.89323	NO	YES	YES	BAA	0	1	1	2
ENSMUSG00000012123	Aim1l	11.2328	0.864291	12.9965	0.0769438	NO	NO	NO	BBB	0	0	0	0
ENSMUSG00000012126	Ubxn11	2.79598	3.78893	0.737935	1.35513	NO	YES	NO	BAB	0	2	0	2
ENSMUSG00000012405	Rpl15	108.678	119.63	0.908452	1.10077	NO	YES	NO	BAB	0	1	0	1
ENSMUSG00000012422	Tmem167	36.682	34.9494	1.04957	0.952768	NO	YES	NO	BAB	0	2	0	2
ENSMUSG00000012429	Mplkip	21.6236	15.3873	1.40529	0.711597	NO	NO	NO	BBB	0	0	0	0
ENSMUSG00000012443	Kif11	79.6331	96.1706	0.828039	1.20767	NO	NO	NO	BBB	0	0	0	0
ENSMUSG00000012483	Rpa3	76.9365	91.3775	0.841963	1.1877	NO	NO	NO	BBB	0	0	0	0
ENSMUSG00000012609	Ttll5	12.7687	14.7265	0.867053	1.15333	NO	NO	YES	BBA	0	0	1	1
ENSMUSG00000012640	Zfp715	13.5162	13.07	1.03414	0.966989	NO	NO	YES	BBA	0	0	1	1
ENSMUSG00000012848	Rps5	2584.41	2251.83	1.14769	0.871314	YES	NO	NO	ABB	1	0	0	0
ENSMUSG00000013033	Lphn1	65.9336	72.1426	0.913935	1.09417	NO	NO	NO	BBB	0	0	0	0
ENSMUSG00000013155	Enkd1	19.8299	26.5875	0.745834	1.34078	NO	NO	NO	BBB	0	0	0	0
ENSMUSG00000013160	Atp6v0d1	53.6978	62.0718	0.865092	1.15595	YES	NO	YES	ABA	3	0	1	1
ENSMUSG00000013275	Slc41a1	11.4781	13.1886	0.870306	1.14902	NO	NO	YES	BBA	0	0	1	1
ENSMUSG00000013367	Iglon5	10.9934	33.2102	0.331024	3.02093	YES	YES	NO	AAB	3	1	0	1
ENSMUSG00000013419	Zfp651	12.6004	9.49456	1.32712	0.753512	NO	YES	YES	BAA	0	2	1	3
ENSMUSG00000013465	Nelfb	74.6924	70.9607	1.05259	0.95004	NO	NO	NO	BBB	0	0	0	0
ENSMUSG00000013495	Tmem175	12.2236	9.30652	1.31344	0.761357	NO	YES	NO	BAB	0	1	0	1
ENSMUSG00000013539	Tango2	11.3444	10.1864	1.11368	0.897922	NO	YES	NO	BAB	0	1	0	1
ENSMUSG00000013584	Aldh1a2	0.198694	38.7935	0.00512184	195.242	YES	NO	YES	ABA	2	0	1	1
ENSMUSG00000013593	Ndufs2	193.933	225.972	0.858216	1.16521	NO	YES	NO	BAB	0	1	0	1
ENSMUSG00000013611	Snx31	8.33183	0.321036	25.9529	0.0385313	YES	NO	YES	ABA	2	0	1	1
ENSMUSG00000013622	Atraid	32.29	38.5919	0.836702	1.19517	NO	NO	NO	BBB	0	0	0	0
ENSMUSG00000013629	Cad	39.099	39.4899	0.990102	1.01	NO	NO	NO	BBB	0	0	0	0
ENSMUSG00000013646	Sh3bp5l	27.9059	27.946	0.998562	1.00144	NO	NO	NO	BBB	0	0	0	0
ENSMUSG00000013662	Atad1	81.3118	58.4721	1.39061	0.719109	NO	YES	NO	BAB	0	3	0	3
ENSMUSG00000013663	Pten	21.9228	22.3619	0.980366	1.02003	NO	YES	NO	BAB	0	1	0	1
ENSMUSG00000013701	Timm23	69.2194	65.3544	1.05914	0.944162	NO	YES	NO	BAB	0	1	0	1
ENSMUSG00000013736	Trnt1	61.965	54.8178	1.13038	0.884657	NO	NO	NO	BBB	0	0	0	0
ENSMUSG00000013766	Ly6g6e	7.78172	0.120536	64.5594	0.0154896	NO	YES	NO	BAB	0	2	0	2
ENSMUSG00000013787	Ehmt2	115.519	145.985	0.791305	1.26374	NO	YES	NO	BAB	0	1	0	1
ENSMUSG00000013822	Elof1	166.897	179.161	0.931544	1.07349	NO	YES	NO	BAB	0	1	0	1
ENSMUSG00000013833	Med16	42.4618	39.5616	1.07331	0.931699	YES	YES	NO	AAB	1	1	0	1
ENSMUSG00000013846	St3gal1	2.80236	13.3544	0.209846	4.76539	YES	YES	NO	AAB	2	2	0	2
ENSMUSG00000013858	Tmem259	88.9545	87.5122	1.01648	0.983786	NO	NO	NO	BBB	0	0	0	0
ENSMUSG00000013878	Rnf170	11.8165	11.4153	1.03515	0.966041	NO	NO	NO	BBB	0	0	0	0
ENSMUSG00000013921	Clip3	128.706	201.716	0.638058	1.56726	NO	NO	NO	BBB	0	0	0	0
ENSMUSG00000013973	Dedd	39.7413	49.7618	0.798631	1.25214	NO	NO	NO	BBB	0	0	0	0
ENSMUSG00000013997	Nit1	41.0225	36.039	1.13828	0.878518	NO	NO	NO	BBB	0	0	0	0
ENSMUSG00000014039	Prdm15	11.2028	10.0223	1.11779	0.894625	NO	YES	YES	BAA	0	1	2	3
ENSMUSG00000014074	Rnf168	32.7229	40.0015	0.818044	1.22243	NO	NO	YES	BBA	0	0	2	2
ENSMUSG00000014075	Tctex1d2	17.3974	20.0712	0.866785	1.15369	NO	NO	NO	BBB	0	0	0	0
ENSMUSG00000014077	Chp1	72.3153	72.4119	0.998667	1.00133	NO	YES	YES	BAA	0	1	1	2
ENSMUSG00000014177	Tvp23b	39.2077	25.9579	1.51043	0.662061	YES	NO	NO	ABB	1	0	0	0
ENSMUSG00000014195	Dnajc7	214.556	212.827	1.00812	0.991945	NO	NO	YES	BBA	0	0	1	1
ENSMUSG00000014232	Cluap1	17.5425	22.7109	0.772427	1.29462	NO	NO	NO	BBB	0	0	0	0
ENSMUSG00000014243	Zswim7	9.41314	15.5687	0.60462	1.65393	NO	YES	YES	BAA	0	1	1	2
ENSMUSG00000014245	Pigl	7.97016	7.36247	1.08254	0.923755	NO	NO	NO	BBB	0	0	0	0
ENSMUSG00000014294	Ndufa2	185.937	198.753	0.935517	1.06893	NO	NO	NO	BBB	0	0	0	0
ENSMUSG00000014329	Bicc1	3.79884	15.7305	0.241495	4.14088	YES	NO	NO	ABB	2	0	0	0
ENSMUSG00000014349	Ube2z	79.8459	73.206	1.0907	0.916841	NO	NO	YES	BBA	0	0	2	2
ENSMUSG00000014353	Tmem87b	16.3217	10.6007	1.53968	0.649488	NO	YES	NO	BAB	0	1	0	1
ENSMUSG00000014355	Anapc1	63.6732	75.606	0.842171	1.18741	NO	NO	YES	BBA	0	0	1	1
ENSMUSG00000014402	Tsg101	90.0019	82.3873	1.09242	0.915396	NO	NO	YES	BBA	0	0	1	1
ENSMUSG00000014418	Hps5	15.8969	14.9777	1.06137	0.942179	NO	YES	NO	BAB	0	1	0	1
ENSMUSG00000014470	Rnf166	24.9283	28.7345	0.867539	1.15269	NO	NO	NO	BBB	0	0	0	0
ENSMUSG00000014496	Ankrd28	29.6701	20.6912	1.43395	0.697374	YES	NO	YES	ABA	1	0	3	3
ENSMUSG00000014498	Ankrd52	34.2584	23.4483	1.46102	0.684453	NO	YES	NO	BAB	0	1	0	1
ENSMUSG00000014504	Srp19	103.427	120.584	0.857716	1.16589	YES	YES	YES	AAA	1	1	1	2
ENSMUSG00000014550	Zfyve20	20.3124	24.6385	0.824416	1.21298	NO	NO	NO	BBB	0	0	0	0
ENSMUSG00000014551	Mrps25	65.1162	70.6457	0.921728	1.08492	NO	NO	NO	BBB	0	0	0	0
ENSMUSG00000014554	Dguok	27.556	32.6374	0.84431	1.1844	NO	NO	YES	BBA	0	0	3	3
ENSMUSG00000014601	Strip1	48.3738	57.6926	0.838475	1.19264	NO	YES	YES	BAA	0	1	1	2
ENSMUSG00000014602	Kif1a	5.93022	4.13218	1.43513	0.696801	YES	YES	YES	AAA	4	1	2	3
ENSMUSG00000014603	Alx3	2.33904	84.1437	0.0277981	35.9736	YES	YES	NO	AAB	2	3	0	3
ENSMUSG00000014606	Slc25a11	115.835	95.5383	1.21244	0.824781	NO	NO	NO	BBB	0	0	0	0
ENSMUSG00000014633	Cmc2	23.9603	34.4759	0.694988	1.43887	NO	NO	NO	BBB	0	0	0	0
ENSMUSG00000014668	Chfr	39.0013	19.0297	2.04949	0.487925	NO	NO	NO	BBB	0	0	0	0
ENSMUSG00000014748	Tex261	48.718	49.8193	0.977894	1.02261	NO	NO	NO	BBB	0	0	0	0
ENSMUSG00000014763	Fam120b	21.9672	17.0583	1.28777	0.776534	YES	NO	YES	ABA	2	0	1	1
ENSMUSG00000014767	Tbp	48.8407	51.7648	0.943511	1.05987	NO	NO	NO	BBB	0	0	0	0
ENSMUSG00000014769	Psmb1	264.975	295.936	0.89538	1.11684	YES	NO	YES	ABA	2	0	1	1
ENSMUSG00000014771	Pdcd2	41.1621	35.9559	1.14479	0.873521	NO	NO	NO	BBB	0	0	0	0
ENSMUSG00000014773	Dll1	3.43403	0.738192	4.65194	0.214964	NO	YES	NO	BAB	0	3	0	3
ENSMUSG00000014778	Fhod1	1.39865	12.0979	0.115611	8.6497	NO	NO	NO	BBB	0	0	0	0
ENSMUSG00000014786	Slc9a5	0.480481	8.7751	0.0547551	18.2631	NO	YES	NO	BAB	0	1	0	1
ENSMUSG00000014791	Elmo3	9.12075	0.669334	13.6266	0.0733858	NO	YES	NO	BAB	0	1	0	1
ENSMUSG00000014837	4931428F04Rik	17.2167	24.2117	0.711088	1.4063	YES	YES	NO	AAB	1	2	0	2
ENSMUSG00000014846	Tppp3	1.82307	7.04416	0.258807	3.86389	YES	YES	YES	AAA	1	1	1	2
ENSMUSG00000014850	Msh3	27.5394	29.6889	0.9276	1.07805	NO	NO	NO	BBB	0	0	0	0
ENSMUSG00000014856	Tmem208	52.5868	47.9086	1.09765	0.911038	NO	NO	NO	BBB	0	0	0	0
ENSMUSG00000014859	E2f4	93.9757	90.894	1.0339	0.967207	NO	NO	NO	BBB	0	0	0	0
ENSMUSG00000014867	Surf4	112.295	116.571	0.963317	1.03808	NO	YES	NO	BAB	0	1	0	1
ENSMUSG00000014873	Surf2	40.0903	36.637	1.09426	0.913861	NO	NO	NO	BBB	0	0	0	0
ENSMUSG00000014905	Dnajb9	18.5574	15.9392	1.16426	0.858911	YES	NO	NO	ABB	1	0	0	0
ENSMUSG00000014907	Naf1	20.3881	14.1717	1.43865	0.695094	NO	NO	NO	BBB	0	0	0	0
ENSMUSG00000014932	Yes1	22.0061	20.0195	1.09923	0.909727	NO	NO	NO	BBB	0	0	0	0
ENSMUSG00000014980	Tsen15	23.5611	31.208	0.754971	1.32455	NO	NO	YES	BBA	0	0	1	1
ENSMUSG00000015002	Efr3a	21.4041	19.4736	1.09913	0.90981	NO	NO	NO	BBB	0	0	0	0
ENSMUSG00000015023	Ddx19a	62.5398	60.6659	1.03089	0.970036	YES	YES	NO	AAB	1	1	0	1
ENSMUSG00000015027	Galns	5.26411	4.11013	1.28077	0.780783	NO	NO	YES	BBA	0	0	1	1
ENSMUSG00000015083	C8g	1.32482	1.7188	0.770783	1.29738	NO	NO	NO	BBB	0	0	0	0
ENSMUSG00000015087	Rabl6	69.9245	71.7521	0.974529	1.02614	NO	YES	NO	BAB	0	1	0	1
ENSMUSG00000015092	Edf1	210.349	136.5	1.54102	0.648919	NO	YES	NO	BAB	0	1	0	1
ENSMUSG00000015094	Npdc1	16.0991	7.08769	2.27141	0.440254	NO	YES	NO	BAB	0	1	0	1
ENSMUSG00000015095	Fbxw5	46.0227	47.7305	0.964218	1.03711	NO	NO	YES	BBA	0	0	1	1
ENSMUSG00000015120	Ube2i	111.77	97.7975	1.14287	0.87499	NO	YES	YES	BAA	0	1	1	2
ENSMUSG00000015126	Tsr3	39.2191	44.0714	0.8899	1.12372	NO	NO	YES	BBA	0	0	2	2
ENSMUSG00000015127	Unkl	7.07524	7.37615	0.959206	1.04253	YES	NO	NO	ABB	1	0	0	0
ENSMUSG00000015133	Lrrk1	31.0409	5.35737	5.79405	0.172591	NO	YES	YES	BAA	0	1	2	3
ENSMUSG00000015149	Sirt2	41.4109	59.7519	0.693047	1.4429	YES	NO	NO	ABB	1	0	0	0
ENSMUSG00000015165	Hnrnpl	520.733	608.859	0.85526	1.16923	YES	YES	YES	AAA	1	1	1	2
ENSMUSG00000015176	Nolc1	72.4494	63.8892	1.13398	0.881847	NO	NO	NO	BBB	0	0	0	0
ENSMUSG00000015189	Casd1	31.5303	42.9007	0.734958	1.36062	NO	YES	NO	BAB	0	3	0	3
ENSMUSG00000015214	Mtmr1	8.87562	7.54402	1.17651	0.849971	YES	NO	NO	ABB	1	0	0	0
ENSMUSG00000015217	Hmgb3	278.682	317.738	0.87708	1.14015	YES	NO	YES	ABA	1	0	1	1
ENSMUSG00000015222	Map2	16.238	21.1888	0.766345	1.3049	NO	NO	YES	BBA	0	0	3	3
ENSMUSG00000015243	Abca1	5.78775	3.07076	1.8848	0.530561	YES	YES	NO	AAB	2	2	0	2
ENSMUSG00000015247	Nipsnap3b	29.4057	32.2976	0.910461	1.09834	NO	NO	YES	BBA	0	0	1	1
ENSMUSG00000015289	Lage3	77.1827	85.676	0.900868	1.11004	NO	YES	YES	BAA	0	1	1	2
ENSMUSG00000015290	Ubl4	51.9204	46.1982	1.12386	0.889788	NO	NO	NO	BBB	0	0	0	0
ENSMUSG00000015291	Gdi1	99.9851	115.778	0.863594	1.15795	NO	NO	NO	BBB	0	0	0	0
ENSMUSG00000015335	Zdhhc12	18.9728	14.5422	1.30467	0.766476	YES	YES	NO	AAB	1	1	0	1
ENSMUSG00000015337	Endog	6.25327	8.55932	0.73058	1.36878	NO	NO	NO	BBB	0	0	0	0
ENSMUSG00000015341	Golga7	105.11	104.893	1.00207	0.997937	NO	NO	NO	BBB	0	0	0	0
ENSMUSG00000015342	Xk	1.26277	2.19905	0.574235	1.74145	YES	NO	NO	ABB	1	0	0	0
ENSMUSG00000015357	Clpx	37.6174	40.3374	0.932571	1.0723	YES	NO	NO	ABB	1	0	0	0
ENSMUSG00000015363	Trabd	41.4058	40.5322	1.02155	0.978903	NO	NO	NO	BBB	0	0	0	0
ENSMUSG00000015377	Dennd6b	4.45935	4.73061	0.942659	1.06083	NO	YES	NO	BAB	0	1	0	1
ENSMUSG00000015452	Ager	3.86494	4.95695	0.779701	1.28254	NO	NO	YES	BBA	0	0	2	2
ENSMUSG00000015461	Atf6b	89.9162	65.689	1.36882	0.730558	NO	YES	NO	BAB	0	1	0	1
ENSMUSG00000015467	Egfl8	0.708733	2.76214	0.256588	3.8973	NO	YES	NO	BAB	0	1	0	1
ENSMUSG00000015468	Notch4	0.866567	5.21182	0.166269	6.01433	NO	YES	NO	BAB	0	1	0	1
ENSMUSG00000015474	Ppt2	16.3459	22.1794	0.736984	1.35688	NO	YES	NO	BAB	0	1	0	1
ENSMUSG00000015478	Rnf5	71.9946	69.7754	1.03181	0.969175	NO	NO	NO	BBB	0	0	0	0
ENSMUSG00000015488	Cacfd1	76.7071	98.4681	0.779004	1.28369	YES	NO	YES	ABA	1	0	1	1
ENSMUSG00000015522	Arnt	35.5802	35.8229	0.993225	1.00682	YES	NO	NO	ABB	1	0	0	0
ENSMUSG00000015533	Itga2	2.9924	1.01023	2.96209	0.3376	YES	YES	NO	AAB	2	2	0	2
ENSMUSG00000015536	Mocs2	37.8292	56.8494	0.665427	1.50279	NO	NO	NO	BBB	0	0	0	0
ENSMUSG00000015568	Lpl	3.27316	9.94941	0.328981	3.03969	NO	NO	NO	BBB	0	0	0	0
ENSMUSG00000015575	Atp6v0e	88.2136	68.9196	1.27995	0.781281	YES	YES	YES	AAA	1	1	1	2
ENSMUSG00000015597	Zfp318	24.4924	20.8948	1.17218	0.853114	NO	YES	NO	BAB	0	1	0	1
ENSMUSG00000015653	Steap2	4.12782	3.9637	1.0414	0.960242	NO	YES	NO	BAB	0	1	0	1
ENSMUSG00000015659	Serac1	4.89043	6.68132	0.731956	1.3662	NO	YES	YES	BAA	0	2	1	3
ENSMUSG00000015668	Pdzd11	71.0068	77.1052	0.920908	1.08589	NO	NO	NO	BBB	0	0	0	0
ENSMUSG00000015671	Psma2	310.697	293.703	1.05786	0.945303	YES	NO	NO	ABB	1	0	0	0
ENSMUSG00000015672	Mrpl32	61.3014	63.8537	0.960029	1.04164	NO	NO	YES	BBA	0	0	1	1
ENSMUSG00000015697	Setdb1	64.4593	56.5898	1.13906	0.877914	YES	YES	YES	AAA	1	1	1	2
ENSMUSG00000015702	Anxa9	6.6953	0.709045	9.4427	0.105902	NO	YES	YES	BAA	0	1	2	3
ENSMUSG00000015709	Arnt2	34.3919	45.1165	0.76229	1.31184	NO	YES	YES	BAA	0	1	1	2
ENSMUSG00000015711	Prune	32.6736	28.951	1.12858	0.886069	NO	NO	NO	BBB	0	0	0	0
ENSMUSG00000015714	Cers2	53.1703	79.9273	0.665233	1.50323	NO	YES	YES	BAA	0	1	1	2
ENSMUSG00000015733	Capza2	117.981	112.18	1.05172	0.950827	YES	NO	YES	ABA	3	0	1	1
ENSMUSG00000015745	Plekho1	65.5858	239.69	0.273628	3.6546	YES	YES	YES	AAA	2	1	1	2
ENSMUSG00000015747	Vps45	16.5165	21.4412	0.770318	1.29817	NO	NO	YES	BBA	0	0	2	2
ENSMUSG00000015748	Prpf3	48.8849	51.7858	0.943983	1.05934	YES	NO	YES	ABA	1	0	1	1
ENSMUSG00000015749	Anp32e	368.303	422.274	0.872189	1.14654	YES	NO	YES	ABA	2	0	1	1
ENSMUSG00000015750	Aph1a	12.9674	11.154	1.16258	0.860158	NO	NO	NO	BBB	0	0	0	0
ENSMUSG00000015757	Ppil4	30.8849	27.9154	1.10638	0.903852	NO	NO	NO	BBB	0	0	0	0
ENSMUSG00000015759	Cnih1	113.72	132.746	0.856673	1.16731	NO	NO	NO	BBB	0	0	0	0
ENSMUSG00000015776	Med22	67.2791	75.8765	0.886692	1.12779	NO	NO	NO	BBB	0	0	0	0
ENSMUSG00000015790	Surf1	34.8845	38.6552	0.902452	1.10809	NO	NO	NO	BBB	0	0	0	0
ENSMUSG00000015804	Med28	146.281	167.986	0.870793	1.14838	YES	NO	YES	ABA	1	0	2	2
ENSMUSG00000015806	Qdpr	55.3288	103.983	0.532097	1.87936	YES	NO	NO	ABB	2	0	0	0
ENSMUSG00000015837	Sqstm1	75.1519	77.5064	0.969622	1.03133	NO	YES	NO	BAB	0	1	0	1
ENSMUSG00000015852	Fcrls	0.854388	3.78548	0.225701	4.43064	NO	YES	NO	BAB	0	1	0	1
ENSMUSG00000015869	Prpsap1	84.0463	93.1398	0.902367	1.1082	NO	YES	YES	BAA	0	1	1	2
ENSMUSG00000015880	Ncapg	46.45	62.1803	0.74702	1.33865	NO	NO	NO	BBB	0	0	0	0
ENSMUSG00000015882	Lcorl	8.80103	9.38728	0.937549	1.06661	NO	NO	YES	BBA	0	0	2	2
ENSMUSG00000015889	Lta4h	74.044	88.1036	0.84042	1.18988	YES	YES	NO	AAB	2	3	0	3
ENSMUSG00000015942	Gtf2ird2	9.49705	8.06342	1.17779	0.849045	NO	YES	YES	BAA	0	1	1	2
ENSMUSG00000015943	Bola1	33.7722	30.6879	1.1005	0.908675	NO	YES	NO	BAB	0	1	0	1
ENSMUSG00000015944	Gatsl2	5.77544	12.7411	0.453291	2.20609	YES	YES	YES	AAA	1	1	2	3
ENSMUSG00000015950	Ncf1	1.43524	2.18016	0.658321	1.51902	NO	YES	NO	BAB	0	1	0	1
ENSMUSG00000015961	Adss	69.3919	77.6424	0.893738	1.1189	NO	NO	YES	BBA	0	0	1	1
ENSMUSG00000015968	Cacna1d	0.865765	3.85577	0.224537	4.4536	NO	NO	NO	BBB	0	0	0	0
ENSMUSG00000015971	Actr8	32.8361	31.7237	1.03507	0.966122	NO	NO	NO	BBB	0	0	0	0
ENSMUSG00000015994	Fnta	60.8467	62.4557	0.974238	1.02644	NO	NO	NO	BBB	0	0	0	0
ENSMUSG00000016018	Skiv2l2	67.3159	77.2162	0.871785	1.14707	NO	NO	NO	BBB	0	0	0	0
ENSMUSG00000016181	Diexf	27.5286	20.1736	1.36459	0.732823	NO	YES	YES	BAA	0	1	2	3
ENSMUSG00000016200	Syt14	6.78901	6.37913	1.06425	0.939626	NO	YES	NO	BAB	0	1	0	1
ENSMUSG00000016252	Atp5e	524.123	500.393	1.04742	0.954725	NO	NO	NO	BBB	0	0	0	0
ENSMUSG00000016253	Nelfcd	83.4999	111.818	0.74675	1.33914	NO	YES	NO	BAB	0	1	0	1
ENSMUSG00000016255	Tubb1	0.060203	6.66648	0.0090307	110.733	NO	NO	NO	BBB	0	0	0	0
ENSMUSG00000016256	Ctsz	78.0513	53.3931	1.46182	0.684078	YES	NO	NO	ABB	1	0	0	0
ENSMUSG00000016257	Slmo2	82.6214	82.0104	1.00745	0.992605	NO	NO	NO	BBB	0	0	0	0
ENSMUSG00000016308	Ube2a	43.2515	47.2328	0.915709	1.09205	NO	NO	NO	BBB	0	0	0	0
ENSMUSG00000016319	Slc25a5	454.905	395.406	1.15048	0.869205	YES	YES	YES	AAA	3	1	1	2
ENSMUSG00000016344	Ppdpf	292.542	309.027	0.946654	1.05635	NO	NO	NO	BBB	0	0	0	0
ENSMUSG00000016409	Nkap	16.7474	20.4227	0.820039	1.21945	NO	NO	YES	BBA	0	0	1	1
ENSMUSG00000016427	Ndufa1	172.584	175.707	0.982227	1.01809	NO	NO	NO	BBB	0	0	0	0
ENSMUSG00000016477	E2f3	32.7603	43.8379	0.747306	1.33814	YES	YES	YES	AAA	1	1	1	2
ENSMUSG00000016481	Cr1l	29.9491	25.479	1.17545	0.850741	NO	NO	NO	BBB	0	0	0	0
ENSMUSG00000016494	Cd34	2.19455	64.304	0.0341278	29.3017	YES	NO	NO	ABB	2	0	0	0
ENSMUSG00000016495	Plgrkt	27.4017	37.3994	0.732677	1.36486	YES	NO	NO	ABB	1	0	0	0
ENSMUSG00000016526	Dyrk3	8.98196	3.60757	2.48975	0.401647	YES	YES	NO	AAB	1	1	0	1
ENSMUSG00000016534	Lamp2	90.5504	62.7052	1.44407	0.692489	YES	NO	NO	ABB	1	0	0	0
ENSMUSG00000016552	Foxred2	7.43068	8.28513	0.89687	1.11499	YES	YES	NO	AAB	1	1	0	1
ENSMUSG00000016554	Eif3d	186.553	194.122	0.961011	1.04057	NO	NO	YES	BBA	0	0	1	1
ENSMUSG00000016559	H3f3b	1022	913.658	1.11858	0.893992	NO	YES	YES	BAA	0	1	1	2
ENSMUSG00000016619	Nup50	52.7931	65.7729	0.802658	1.24586	NO	YES	YES	BAA	0	1	1	2
ENSMUSG00000016624	Phf21b	2.50105	4.27899	0.584496	1.71088	NO	YES	NO	BAB	0	2	0	2
ENSMUSG00000016637	Ift27	37.5399	62.8903	0.596911	1.67529	YES	YES	YES	AAA	2	1	2	3
ENSMUSG00000016757	Ttll12	51.5627	58.9812	0.874222	1.14387	NO	YES	YES	BAA	0	1	1	2
ENSMUSG00000016763	Scube1	2.35324	34.6673	0.0678808	14.7317	YES	YES	NO	AAB	1	2	0	2
ENSMUSG00000016831	Tox4	35.4222	35.2662	1.00442	0.995597	NO	NO	NO	BBB	0	0	0	0
ENSMUSG00000016833	Mrps18c	84.5954	100.001	0.845942	1.18211	NO	NO	NO	BBB	0	0	0	0
ENSMUSG00000016921	Srsf6	361.646	386.919	0.93468	1.06988	NO	NO	YES	BBA	0	0	1	1
ENSMUSG00000016933	Plcg1	75.5245	106.468	0.709361	1.40972	NO	NO	YES	BBA	0	0	2	2
ENSMUSG00000016940	Kctd2	33.3219	34.4297	0.967824	1.03325	YES	NO	NO	ABB	1	0	0	0
ENSMUSG00000016946	Kctd5	79.4817	80.7385	0.984435	1.01581	NO	NO	NO	BBB	0	0	0	0
ENSMUSG00000017057	Il13ra1	8.99323	4.39901	2.04438	0.489146	YES	NO	NO	ABB	1	0	0	0
ENSMUSG00000017119	Nbr1	78.2306	60.0387	1.303	0.767458	NO	NO	NO	BBB	0	0	0	0
ENSMUSG00000017146	Brca1	21.4961	22.4019	0.959567	1.04214	NO	NO	NO	BBB	0	0	0	0
ENSMUSG00000017176	Nt5c3b	101.86	130.767	0.778944	1.28379	NO	NO	NO	BBB	0	0	0	0
ENSMUSG00000017188	Coa3	104.557	129.358	0.808277	1.2372	NO	NO	NO	BBB	0	0	0	0
ENSMUSG00000017210	Med24	55.1902	62.4478	0.883781	1.1315	NO	YES	NO	BAB	0	2	0	2
ENSMUSG00000017221	Psmd3	165.091	164.485	1.00368	0.996329	NO	YES	NO	BAB	0	1	0	1
ENSMUSG00000017264	Exosc10	57.4453	74.5949	0.770097	1.29854	NO	NO	NO	BBB	0	0	0	0
ENSMUSG00000017291	Taok1	22.76	14.4936	1.57035	0.6368	YES	YES	YES	AAA	1	2	1	3
ENSMUSG00000017299	Dnttip1	29.9458	38.022	0.787591	1.26969	NO	NO	NO	BBB	0	0	0	0
ENSMUSG00000017307	Acot8	13.2697	12.8643	1.03152	0.969445	YES	YES	NO	AAB	1	2	0	2
ENSMUSG00000017314	Mpp2	8.26911	15.3244	0.539604	1.85321	YES	NO	NO	ABB	3	0	0	0
ENSMUSG00000017376	Nlk	29.2682	11.9495	2.44932	0.408276	NO	NO	YES	BBA	0	0	1	1
ENSMUSG00000017390	Aldoc	6.32956	1.96571	3.21998	0.310561	YES	NO	NO	ABB	1	0	0	0
ENSMUSG00000017404	Rpl19	73.3555	77.9435	0.941137	1.06254	NO	YES	NO	BAB	0	2	0	2
ENSMUSG00000017405	Nek8	9.55106	10.52	0.907897	1.10145	NO	NO	YES	BBA	0	0	1	1
ENSMUSG00000017418	Arl5b	61.3028	53.3263	1.14958	0.869883	NO	NO	NO	BBB	0	0	0	0
ENSMUSG00000017421	Zfp207	298.696	318.549	0.937677	1.06647	NO	NO	NO	BBB	0	0	0	0
ENSMUSG00000017428	Psmd11	83.333	80.8223	1.03106	0.969872	NO	NO	NO	BBB	0	0	0	0
ENSMUSG00000017466	Timp2	35.4899	76.6828	0.462814	2.1607	NO	YES	YES	BAA	0	2	1	3
ENSMUSG00000017550	Atad5	17.2414	21.2962	0.809599	1.23518	YES	NO	NO	ABB	1	0	0	0
ENSMUSG00000017615	Tnfaip1	82.5643	74.0407	1.11512	0.896763	NO	NO	NO	BBB	0	0	0	0
ENSMUSG00000017652	Cd40	0.436487	4.08235	0.10692	9.35275	YES	YES	YES	AAA	1	2	1	3
ENSMUSG00000017667	Zfp334	12.5788	27.139	0.463496	2.15752	NO	YES	NO	BAB	0	1	0	1
ENSMUSG00000017677	Wsb1	120.814	145.149	0.832343	1.20143	YES	YES	YES	AAA	1	1	2	3
ENSMUSG00000017679	Ttpal	34.0001	34.2674	0.992199	1.00786	NO	YES	YES	BAA	0	2	1	3
ENSMUSG00000017686	Rhot1	45.0981	41.2359	1.09366	0.91436	YES	YES	YES	AAA	1	1	1	2
ENSMUSG00000017697	Ada	2.47173	8.0531	0.306929	3.25808	YES	NO	NO	ABB	2	0	0	0
ENSMUSG00000017707	Serinc3	38.3876	49.6263	0.773533	1.29277	NO	YES	YES	BAA	0	1	2	3
ENSMUSG00000017716	Birc5	174.382	265.715	0.656275	1.52375	YES	NO	NO	ABB	1	0	0	0
ENSMUSG00000017718	Afmid	3.15352	3.32431	0.948624	1.05416	NO	NO	NO	BBB	0	0	0	0
ENSMUSG00000017734	Dbndd2	4.49971	2.69903	1.66716	0.599822	NO	YES	NO	BAB	0	1	0	1
ENSMUSG00000017747	Ghdc	5.02318	5.09256	0.986376	1.01381	NO	NO	NO	BBB	0	0	0	0
ENSMUSG00000017754	Pltp	147.319	5.53983	26.5928	0.0376042	NO	NO	NO	BBB	0	0	0	0
ENSMUSG00000017756	Slc12a7	25.6019	33.6279	0.761328	1.31349	YES	YES	NO	AAB	2	2	0	2
ENSMUSG00000017760	Ctsa	52.3272	67.6187	0.773856	1.29223	NO	NO	NO	BBB	0	0	0	0
ENSMUSG00000017764	Zswim1	10.9742	11.0424	0.99383	1.00621	NO	NO	YES	BBA	0	0	1	1
ENSMUSG00000017765	Slc12a4	63.0792	19.5035	3.23425	0.309191	NO	YES	NO	BAB	0	1	0	1
ENSMUSG00000017774	Myo1c	24.0747	18.1408	1.3271	0.753521	NO	YES	NO	BAB	0	1	0	1
ENSMUSG00000017776	Crk	134.738	136.597	0.986391	1.0138	NO	NO	YES	BBA	0	0	1	1
ENSMUSG00000017778	Cox7c	53.9664	56.4835	0.955437	1.04664	NO	NO	YES	BBA	0	0	2	2
ENSMUSG00000017781	Pitpna	74.6309	88.6376	0.841978	1.18768	NO	YES	NO	BAB	0	1	0	1
ENSMUSG00000017801	Mlx	37.454	38.6352	0.969427	1.03154	NO	NO	NO	BBB	0	0	0	0
ENSMUSG00000017802	Fam134c	72.6553	52.3183	1.38872	0.720089	NO	NO	NO	BBB	0	0	0	0
ENSMUSG00000017831	Rab5a	57.614	39.5611	1.45633	0.686658	NO	NO	NO	BBB	0	0	0	0
ENSMUSG00000017837	Nkiras2	60.3429	73.9299	0.816218	1.22516	NO	YES	YES	BAA	0	2	1	3
ENSMUSG00000017858	Ift52	67.6493	50.9862	1.32682	0.753684	YES	YES	YES	AAA	2	1	1	2
ENSMUSG00000017861	Mybl2	25.3206	30.3182	0.835163	1.19737	YES	NO	YES	ABA	1	0	1	1
ENSMUSG00000017999	Ddx27	47.3473	44.8231	1.05632	0.946686	NO	YES	YES	BAA	0	1	1	2
ENSMUSG00000018012	Rac3	99.5267	42.4212	2.34616	0.426229	YES	NO	NO	ABB	1	0	0	0
ENSMUSG00000018040	Rrp7a	66.8187	57.9688	1.15267	0.867553	NO	YES	YES	BAA	0	1	2	3
ENSMUSG00000018042	Cyb5r3	162.849	80.1644	2.03143	0.492263	YES	YES	YES	AAA	1	1	2	3
ENSMUSG00000018068	Ints2	30.7661	33.0032	0.932216	1.07271	NO	NO	NO	BBB	0	0	0	0
ENSMUSG00000018102	Hist1h2bc	20.7532	13.6826	1.51676	0.659302	YES	YES	NO	AAB	1	1	0	1
ENSMUSG00000018126	Baiap2l2	2.32353	7.32232	0.317322	3.15138	YES	YES	NO	AAB	1	2	0	2
ENSMUSG00000018143	Mafk	10.5807	4.02356	2.6297	0.380272	YES	YES	NO	AAB	1	2	0	2
ENSMUSG00000018160	Med1	27.839	33.403	0.833427	1.19986	NO	NO	NO	BBB	0	0	0	0
ENSMUSG00000018166	Erbb3	40.347	6.2069	6.50034	0.153838	YES	YES	NO	AAB	1	2	0	2
ENSMUSG00000018167	Stard3	25.1252	28.148	0.892609	1.12031	YES	YES	NO	AAB	1	2	0	2
ENSMUSG00000018189	Uchl5	55.2629	47.032	1.17501	0.85106	YES	YES	YES	AAA	1	1	1	2
ENSMUSG00000018196	Glrx2	52.6412	63.354	0.830907	1.2035	NO	YES	NO	BAB	0	1	0	1
ENSMUSG00000018199	Trove2	26.3826	25.1051	1.05089	0.951576	NO	NO	NO	BBB	0	0	0	0
ENSMUSG00000018209	Stk4	39.8031	26.7998	1.4852	0.673311	NO	YES	NO	BAB	0	1	0	1
ENSMUSG00000018239	Zcchc10	18.1065	20.9108	0.865893	1.15488	NO	NO	NO	BBB	0	0	0	0
ENSMUSG00000018286	Psmb6	535.599	602.825	0.888481	1.12552	NO	NO	NO	BBB	0	0	0	0
ENSMUSG00000018287	Spag7	108.475	99.5138	1.09005	0.917385	YES	NO	NO	ABB	1	0	0	0
ENSMUSG00000018293	Pfn1	755.775	1121.68	0.673791	1.48414	NO	NO	YES	BBA	0	0	1	1
ENSMUSG00000018322	Tomm34	27.7935	32.8377	0.84639	1.18149	YES	YES	NO	AAB	1	1	0	1
ENSMUSG00000018326	Ywhab	256.977	281.5	0.912885	1.09543	YES	NO	YES	ABA	1	0	1	1
ENSMUSG00000018339	Gpx3	19.0303	77.9791	0.244044	4.09763	YES	YES	NO	AAB	1	1	0	1
ENSMUSG00000018347	Zkscan6	10.9975	8.30244	1.32461	0.754941	YES	NO	YES	ABA	1	0	1	1
ENSMUSG00000018363	Smurf2	53.3865	45.1852	1.1815	0.846379	NO	YES	NO	BAB	0	1	0	1
ENSMUSG00000018372	Cep95	15.7129	15.2413	1.03094	0.969989	NO	NO	NO	BBB	0	0	0	0
ENSMUSG00000018377	Vezf1	69.8705	68.372	1.02192	0.978553	YES	YES	NO	AAB	2	2	0	2
ENSMUSG00000018379	Srsf1	685.187	786.399	0.871298	1.14771	YES	YES	NO	AAB	1	1	0	1
ENSMUSG00000018395	Kif3a	32.658	33.5067	0.97467	1.02599	NO	NO	NO	BBB	0	0	0	0
ENSMUSG00000018398	Septin8	30.9525	48.5619	0.637383	1.56892	NO	NO	NO	BBB	0	0	0	0
ENSMUSG00000018401	Mtmr4	65.981	58.9994	1.11833	0.894188	NO	NO	NO	BBB	0	0	0	0
ENSMUSG00000018412	Kansl1	55.6976	56.8824	0.979171	1.02127	YES	NO	NO	ABB	1	0	0	0
ENSMUSG00000018415	Gid4	34.6559	25.2779	1.371	0.729395	NO	NO	NO	BBB	0	0	0	0
ENSMUSG00000018425	Dhx40	32.3203	35.1547	0.919375	1.0877	YES	YES	NO	AAB	2	2	0	2
ENSMUSG00000018433	Nol11	46.8786	51.7213	0.90637	1.1033	NO	NO	YES	BBA	0	0	2	2
ENSMUSG00000018442	Derl2	22.7614	20.1283	1.13081	0.884319	NO	NO	NO	BBB	0	0	0	0
ENSMUSG00000018446	C1qbp	256.873	247.308	1.03868	0.962764	NO	NO	NO	BBB	0	0	0	0
ENSMUSG00000018449	Rpain	26.3916	36.7328	0.718475	1.39184	NO	NO	NO	BBB	0	0	0	0
ENSMUSG00000018451	6330403K07Rik	179.001	174.716	1.02453	0.97606	NO	NO	NO	BBB	0	0	0	0
ENSMUSG00000018474	Chd3	293.876	274.229	1.07165	0.933144	NO	NO	YES	BBA	0	0	3	3
ENSMUSG00000018481	Appbp2	42.1389	34.4555	1.22299	0.817665	YES	NO	YES	ABA	1	0	2	2
ENSMUSG00000018500	Adora2b	1.40712	6.85987	0.205123	4.87513	NO	NO	YES	BBA	0	0	2	2
ENSMUSG00000018501	Ncor1	101.682	110.641	0.919028	1.08811	NO	NO	NO	BBB	0	0	0	0
ENSMUSG00000018509	Cenpv	4.11417	59.8837	0.0687027	14.5555	NO	NO	NO	BBB	0	0	0	0
ENSMUSG00000018537	Pcgf2	64.7913	73.0016	0.887533	1.12672	NO	YES	YES	BAA	0	1	1	2
ENSMUSG00000018541	Cwc25	18.588	19.9338	0.932485	1.0724	NO	NO	NO	BBB	0	0	0	0
ENSMUSG00000018547	Pip4k2b	28.7963	52.5897	0.547566	1.82626	NO	NO	NO	BBB	0	0	0	0
ENSMUSG00000018548	Trim37	27.3123	28.3175	0.964501	1.03681	YES	NO	NO	ABB	1	0	0	0
ENSMUSG00000018554	Ybx2	23.2417	19.896	1.16816	0.856044	NO	YES	NO	BAB	0	3	0	3
ENSMUSG00000018559	Ctdnep1	112.204	120.532	0.930907	1.07422	NO	NO	NO	BBB	0	0	0	0
ENSMUSG00000018565	Elp5	90.4225	115.224	0.784752	1.27429	NO	NO	NO	BBB	0	0	0	0
ENSMUSG00000018566	Slc2a4	12.1648	28.3125	0.429662	2.32741	NO	YES	NO	BAB	0	1	0	1
ENSMUSG00000018567	Gabarap	257.649	324.958	0.792867	1.26124	NO	NO	NO	BBB	0	0	0	0
ENSMUSG00000018569	Cldn7	125.848	0.890286	141.356	0.00707431	NO	NO	NO	BBB	0	0	0	0
ENSMUSG00000018570	2810408A11Rik	18.0687	19.4328	0.929801	1.0755	NO	YES	NO	BAB	0	1	0	1
ENSMUSG00000018572	Phf23	125.327	128.87	0.972509	1.02827	NO	NO	NO	BBB	0	0	0	0
ENSMUSG00000018583	G3bp1	141.604	133.009	1.06462	0.939298	NO	YES	YES	BAA	0	2	1	3
ENSMUSG00000018585	Atox1	352.383	130.778	2.69451	0.371124	YES	YES	NO	AAB	1	1	0	1
ENSMUSG00000018599	Mief2	6.43682	13.8204	0.465747	2.14709	NO	NO	NO	BBB	0	0	0	0
ENSMUSG00000018651	Tada2a	31.2865	33.1141	0.944808	1.05842	NO	NO	YES	BBA	0	0	1	1
ENSMUSG00000018659	Pnpo	22.4104	24.0447	0.932032	1.07292	YES	YES	NO	AAB	1	1	0	1
ENSMUSG00000018661	Cog1	14.7175	19.8241	0.742404	1.34697	NO	YES	NO	BAB	0	3	0	3
ENSMUSG00000018666	Cbx1	215.433	291.907	0.738019	1.35498	YES	NO	YES	ABA	1	0	1	1
ENSMUSG00000018677	Slc25a39	129.271	114.977	1.12432	0.889427	NO	YES	YES	BAA	0	2	1	3
ENSMUSG00000018697	Aatf	30.0729	26.1241	1.15115	0.868694	YES	YES	YES	AAA	1	1	1	2
ENSMUSG00000018733	Pex12	12.0699	8.87561	1.35989	0.735351	NO	NO	NO	BBB	0	0	0	0
ENSMUSG00000018736	Ndel1	43.1263	39.0683	1.10387	0.905906	NO	YES	YES	BAA	0	1	1	2
ENSMUSG00000018740	Slc25a35	1.97996	2.10516	0.940528	1.06323	NO	NO	NO	BBB	0	0	0	0
ENSMUSG00000018750	Zbtb4	3.68089	2.42588	1.51734	0.659048	YES	YES	NO	AAB	1	1	0	1
ENSMUSG00000018761	Mpdu1	57.3052	64.0125	0.895219	1.11705	NO	YES	YES	BAA	0	1	1	2
ENSMUSG00000018765	Fxr2	101.453	98.1883	1.03325	0.967817	NO	NO	YES	BBA	0	0	1	1
ENSMUSG00000018770	Atp5g3	633.265	694.627	0.911663	1.0969	YES	NO	NO	ABB	1	0	0	0
ENSMUSG00000018774	Cd68	3.52498	4.30693	0.818442	1.22183	NO	NO	YES	BBA	0	0	1	1
ENSMUSG00000018796	Acsl1	2.85887	5.03385	0.567929	1.76078	NO	YES	NO	BAB	0	1	0	1
ENSMUSG00000018800	Abca5	1.43586	2.73694	0.524623	1.90613	YES	NO	NO	ABB	2	0	0	0
ENSMUSG00000018809	Smyd4	8.8167	11.1196	0.792898	1.2612	YES	NO	NO	ABB	1	0	0	0
ENSMUSG00000018819	Lsp1	4.89246	39.5209	0.123794	8.07791	NO	YES	NO	BAB	0	2	0	2
ENSMUSG00000018820	Zfyve27	24.0005	15.3511	1.56344	0.639615	YES	YES	YES	AAA	1	2	1	3
ENSMUSG00000018821	Avpi1	35.8732	19.0403	1.88406	0.530768	NO	YES	YES	BAA	0	1	1	2
ENSMUSG00000018841	Rad51d	9.97399	10.457	0.953809	1.04843	NO	NO	NO	BBB	0	0	0	0
ENSMUSG00000018846	Pank3	48.0788	41.1654	1.16794	0.856207	YES	NO	YES	ABA	1	0	3	3
ENSMUSG00000018858	Ict1	93.9421	111.274	0.844243	1.18449	NO	NO	NO	BBB	0	0	0	0
ENSMUSG00000018861	Fdxr	9.35563	9.70602	0.9639	1.03745	NO	NO	NO	BBB	0	0	0	0
ENSMUSG00000018865	Sult4a1	2.31609	3.87119	0.598289	1.67143	NO	YES	YES	BAA	0	1	2	3
ENSMUSG00000018893	Mb	2.94482	0.133539	22.0521	0.0453471	YES	YES	YES	AAA	2	2	1	3
ENSMUSG00000018900	Slc22a5	7.30592	7.46043	0.979289	1.02115	NO	YES	YES	BAA	0	1	1	2
ENSMUSG00000018906	P4ha2	16.1969	30.398	0.532827	1.87678	YES	NO	YES	ABA	4	0	3	3
ENSMUSG00000018920	Cxcl16	2.72432	0.512559	5.31513	0.188142	NO	YES	YES	BAA	0	1	1	2
ENSMUSG00000018921	Pelp1	45.8711	48.2131	0.951424	1.05106	NO	NO	YES	BBA	0	0	1	1
ENSMUSG00000018923	Med11	66.8358	56.5841	1.18118	0.846613	NO	YES	YES	BAA	0	1	1	2
ENSMUSG00000018931	Natd1	28.1873	30.951	0.910707	1.09805	NO	NO	NO	BBB	0	0	0	0
ENSMUSG00000018974	Sart3	52.1578	55.2715	0.943665	1.0597	NO	YES	NO	BAB	0	1	0	1
ENSMUSG00000018986	Slfn3	0.0777485	4.2888	0.0181283	55.1625	YES	NO	YES	ABA	1	0	2	2
ENSMUSG00000018995	Nars2	9.12543	11.6652	0.782275	1.27832	YES	YES	YES	AAA	1	2	1	3
ENSMUSG00000018999	Slc35b4	21.0729	28.7451	0.733094	1.36408	YES	NO	YES	ABA	1	0	2	2
ENSMUSG00000019039	Dalrd3	38.9279	34.9256	1.11459	0.897187	NO	NO	YES	BBA	0	0	1	1
ENSMUSG00000019054	Fis1	215.049	212.462	1.01218	0.987967	YES	NO	NO	ABB	1	0	0	0
ENSMUSG00000019066	Rab3d	7.21609	2.91397	2.47638	0.403816	YES	YES	NO	AAB	2	1	0	1
ENSMUSG00000019080	Mfsd3	3.71966	1.99468	1.86479	0.536253	YES	YES	NO	AAB	1	1	0	1
ENSMUSG00000019082	Slc25a22	20.3429	26.2462	0.775078	1.29019	NO	YES	YES	BAA	0	1	1	2
ENSMUSG00000019087	Atp6ap1	81.3081	73.9851	1.09898	0.909935	NO	NO	NO	BBB	0	0	0	0
ENSMUSG00000019088	Dnase1l1	5.38061	3.64841	1.47478	0.678066	NO	NO	NO	BBB	0	0	0	0
ENSMUSG00000019132	BC005537	107.245	95.8402	1.11899	0.89366	NO	NO	YES	BBA	0	0	1	1
ENSMUSG00000019143	Hars2	34.8039	36.7646	0.94667	1.05633	NO	NO	NO	BBB	0	0	0	0
ENSMUSG00000019158	Tmem160	26.0781	31.0668	0.83942	1.1913	YES	YES	YES	AAA	1	2	1	3
ENSMUSG00000019173	Rab5c	135.959	129.095	1.05317	0.949515	NO	YES	YES	BAA	0	1	1	2
ENSMUSG00000019179	Mdh2	333.419	345.089	0.966181	1.035	YES	NO	NO	ABB	2	0	0	0
ENSMUSG00000019188	H13	70.497	70.6467	0.997881	1.00212	NO	YES	NO	BAB	0	3	0	3
ENSMUSG00000019189	Rnf145	105.022	68.4342	1.53464	0.65162	YES	NO	NO	ABB	1	0	0	0
ENSMUSG00000019210	Atp6v1e1	85.6437	80.5896	1.06271	0.940987	NO	NO	YES	BBA	0	0	1	1
ENSMUSG00000019214	Chtf18	22	29.9466	0.734642	1.36121	NO	NO	YES	BBA	0	0	1	1
ENSMUSG00000019256	Ahr	14.7413	2.17878	6.76584	0.147801	NO	NO	YES	BBA	0	0	1	1
ENSMUSG00000019261	Map1s	19.6556	22.8469	0.860317	1.16236	NO	YES	YES	BAA	0	1	1	2
ENSMUSG00000019297	Nop9	26.2434	28.7334	0.913343	1.09488	NO	YES	NO	BAB	0	1	0	1
ENSMUSG00000019302	Atp6v0a1	17.5442	19.2959	0.909215	1.09985	YES	YES	NO	AAB	1	2	0	2
ENSMUSG00000019303	Psmc3ip	34.7353	49.2792	0.704867	1.41871	NO	NO	YES	BBA	0	0	1	1
ENSMUSG00000019320	Noxo1	1.51709	2.21893	0.683703	1.46262	NO	NO	NO	BBB	0	0	0	0
ENSMUSG00000019338	Zfp687	38.9184	31.6801	1.22848	0.814012	NO	YES	NO	BAB	0	1	0	1
ENSMUSG00000019359	Gdpd2	6.96925	0.266109	26.1894	0.0381834	YES	YES	NO	AAB	3	2	0	2
ENSMUSG00000019362	D8Ertd738e	247.796	279.731	0.885838	1.12887	NO	NO	NO	BBB	0	0	0	0
ENSMUSG00000019370	Calm3	173.076	343.134	0.504397	1.98257	YES	NO	NO	ABB	2	0	0	0
ENSMUSG00000019373	Cops3	138.074	155.593	0.887405	1.12688	NO	NO	NO	BBB	0	0	0	0
ENSMUSG00000019428	Fkbp8	278.343	251.703	1.10584	0.904292	NO	NO	NO	BBB	0	0	0	0
ENSMUSG00000019432	Ddx39b	513.919	586.576	0.876134	1.14138	NO	YES	YES	BAA	0	1	1	2
ENSMUSG00000019437	Tlcd1	5.95803	6.07544	0.980676	1.01971	NO	NO	NO	BBB	0	0	0	0
ENSMUSG00000019461	Plscr3	115.247	97.5005	1.18201	0.846016	NO	YES	NO	BAB	0	1	0	1
ENSMUSG00000019467	Arhgef25	31.9778	53.0511	0.602774	1.659	NO	YES	NO	BAB	0	2	0	2
ENSMUSG00000019470	Xab2	41.9575	40.7469	1.02971	0.971147	NO	NO	NO	BBB	0	0	0	0
ENSMUSG00000019471	Cdc37	144.224	180.945	0.797059	1.25461	NO	YES	YES	BAA	0	2	1	3
ENSMUSG00000019487	Trip10	22.2263	15.2868	1.45395	0.687782	YES	YES	NO	AAB	1	1	0	1
ENSMUSG00000019494	Cops6	151.236	212.251	0.712533	1.40344	NO	NO	NO	BBB	0	0	0	0
ENSMUSG00000019505	Ubb	1079.13	1273.68	0.847255	1.18028	NO	YES	YES	BAA	0	1	1	2
ENSMUSG00000019518	Ap4m1	32.7563	41.5099	0.78912	1.26724	NO	NO	NO	BBB	0	0	0	0
ENSMUSG00000019528	Gyg	34.4985	44.8822	0.768644	1.30099	NO	YES	NO	BAB	0	3	0	3
ENSMUSG00000019558	Slc6a8	32.9252	34.5396	0.953258	1.04903	NO	YES	NO	BAB	0	1	0	1
ENSMUSG00000019578	Ubxn6	41.5986	49.0254	0.848511	1.17854	NO	YES	NO	BAB	0	1	0	1
ENSMUSG00000019579	D17Wsu104e	49.6523	48.9883	1.01356	0.986626	NO	NO	NO	BBB	0	0	0	0
ENSMUSG00000019590	Cyb561	31.8018	1.91633	16.5951	0.0602586	YES	YES	YES	AAA	2	1	1	2
ENSMUSG00000019689	1110001J03Rik	57.3177	46.2196	1.24012	0.806375	NO	NO	NO	BBB	0	0	0	0
ENSMUSG00000019699	Akt3	18.9538	32.0325	0.591705	1.69003	YES	NO	NO	ABB	3	0	0	0
ENSMUSG00000019710	Mrpl24	101.212	100.24	1.00969	0.990399	NO	YES	NO	BAB	0	1	0	1
ENSMUSG00000019715	Gle1	44.4563	41.8789	1.06154	0.942024	NO	NO	NO	BBB	0	0	0	0
ENSMUSG00000019718	L3hypdh	12.7298	9.70542	1.31162	0.762415	NO	YES	NO	BAB	0	1	0	1
ENSMUSG00000019726	Lyst	1.93352	2.49804	0.774014	1.29197	NO	NO	NO	BBB	0	0	0	0
ENSMUSG00000019731	Slc35e1	38.0494	39.111	0.972858	1.0279	NO	NO	NO	BBB	0	0	0	0
ENSMUSG00000019734	Tmc4	9.19866	4.47613	2.05505	0.486606	YES	YES	NO	AAB	1	1	0	1
ENSMUSG00000019737	Syne4	28.9151	29.1054	0.993463	1.00658	NO	NO	NO	BBB	0	0	0	0
ENSMUSG00000019738	Polr2i	85.9489	112.442	0.764384	1.30824	YES	YES	NO	AAB	1	1	0	1
ENSMUSG00000019761	Krt10	5.50341	4.38992	1.25365	0.797673	NO	NO	YES	BBA	0	0	1	1
ENSMUSG00000019763	Rmnd1	24.658	21.105	1.16835	0.85591	NO	NO	YES	BBA	0	0	2	2
ENSMUSG00000019773	Fbxo5	63.4258	92.8039	0.683439	1.46319	NO	YES	NO	BAB	0	1	0	1
ENSMUSG00000019774	Mtrf1l	13.249	14.5671	0.909515	1.09949	NO	NO	NO	BBB	0	0	0	0
ENSMUSG00000019777	Hdac2	316.548	355.999	0.889182	1.12463	YES	YES	YES	AAA	1	1	2	3
ENSMUSG00000019779	Frk	6.79451	8.35339	0.813384	1.22943	NO	YES	YES	BAA	0	1	2	3
ENSMUSG00000019782	Rwdd1	58.4845	67.0295	0.872519	1.14611	NO	NO	NO	BBB	0	0	0	0
ENSMUSG00000019789	Hey2	3.78385	39.1807	0.0965744	10.3547	YES	NO	YES	ABA	2	0	1	1
ENSMUSG00000019790	Stxbp5	10.076	5.86146	1.71902	0.581726	NO	NO	YES	BBA	0	0	1	1
ENSMUSG00000019791	Hint3	6.69245	8.73092	0.766523	1.30459	NO	NO	NO	BBB	0	0	0	0
ENSMUSG00000019792	Trmt11	11.8017	13.2981	0.887472	1.1268	NO	NO	NO	BBB	0	0	0	0
ENSMUSG00000019795	Pcmt1	57.798	64.2806	0.899152	1.11216	NO	NO	NO	BBB	0	0	0	0
ENSMUSG00000019796	Lrp11	3.26568	1.80433	1.80992	0.552511	NO	NO	NO	BBB	0	0	0	0
ENSMUSG00000019797	1700021F05Rik	43.9893	44.0662	0.998255	1.00175	YES	NO	YES	ABA	1	0	1	1
ENSMUSG00000019802	Sec63	67.8152	65.1737	1.04053	0.96105	YES	YES	NO	AAB	2	1	0	1
ENSMUSG00000019806	Aig1	23.1167	9.00597	2.56682	0.389587	NO	YES	YES	BAA	0	1	1	2
ENSMUSG00000019808	Adat2	7.82479	8.66417	0.90312	1.10727	NO	NO	NO	BBB	0	0	0	0
ENSMUSG00000019809	Pex3	15.6145	19.5852	0.79726	1.2543	YES	YES	YES	AAA	1	2	1	3
ENSMUSG00000019810	Fuca2	43.926	17.373	2.5284	0.395507	NO	NO	NO	BBB	0	0	0	0
ENSMUSG00000019814	Ltv1	62.1217	48.6437	1.27708	0.783039	NO	NO	NO	BBB	0	0	0	0
ENSMUSG00000019822	Smpd2	38.1619	37.3747	1.02106	0.979373	NO	NO	NO	BBB	0	0	0	0
ENSMUSG00000019823	Mical1	26.8897	29.3641	0.915733	1.09202	NO	YES	YES	BAA	0	1	1	2
ENSMUSG00000019826	Zbtb24	15.8807	14.3957	1.10315	0.906494	NO	NO	NO	BBB	0	0	0	0
ENSMUSG00000019831	Wasf1	29.6895	37.3285	0.795358	1.2573	NO	NO	NO	BBB	0	0	0	0
ENSMUSG00000019832	Rab32	8.63842	7.71276	1.12002	0.892844	YES	YES	YES	AAA	1	1	2	3
ENSMUSG00000019837	Gtf3c6	89.8026	103.815	0.865025	1.15604	NO	NO	YES	BBA	0	0	1	1
ENSMUSG00000019843	Fyn	25.4492	48.5551	0.524129	1.90793	NO	YES	NO	BAB	0	2	0	2
ENSMUSG00000019845	Tube1	7.53863	8.84933	0.851888	1.17386	NO	YES	NO	BAB	0	1	0	1
ENSMUSG00000019846	Lama4	0.222475	16.3482	0.0136086	73.4832	YES	NO	YES	ABA	1	0	1	1
ENSMUSG00000019849	Prep	80.9536	80.5743	1.00471	0.995315	NO	YES	NO	BAB	0	3	0	3
ENSMUSG00000019854	Reps1	88.2049	52.4026	1.68322	0.5941	NO	NO	NO	BBB	0	0	0	0
ENSMUSG00000019856	Fam184a	3.4152	3.85784	0.885263	1.12961	YES	YES	YES	AAA	1	1	2	3
ENSMUSG00000019857	Asf1a	49.9625	54.4238	0.918028	1.08929	YES	YES	NO	AAB	1	1	0	1
ENSMUSG00000019861	Gopc	22.145	18.714	1.18334	0.845066	NO	NO	NO	BBB	0	0	0	0
ENSMUSG00000019863	Qrsl1	17.8368	16.3746	1.08929	0.918026	NO	NO	NO	BBB	0	0	0	0
ENSMUSG00000019866	Aim1	8.71985	0.367082	23.7545	0.0420973	NO	NO	NO	BBB	0	0	0	0
ENSMUSG00000019868	Vta1	77.2793	68.802	1.12321	0.890303	NO	NO	NO	BBB	0	0	0	0
ENSMUSG00000019872	Smpdl3a	8.49144	5.82304	1.45825	0.685754	YES	YES	NO	AAB	1	2	0	2
ENSMUSG00000019874	Fabp7	0.147283	7.21942	0.020401	49.0173	NO	NO	NO	BBB	0	0	0	0
ENSMUSG00000019877	Serinc1	103.103	113.76	0.906315	1.10337	NO	NO	NO	BBB	0	0	0	0
ENSMUSG00000019878	Hsf2	28.4789	42.7025	0.666915	1.49944	NO	YES	NO	BAB	0	2	0	2
ENSMUSG00000019880	Rspo3	0.304651	19.9164	0.0152965	65.3746	NO	YES	YES	BAA	0	2	1	3
ENSMUSG00000019883	Echdc1	28.7798	14.7302	1.9538	0.511823	NO	NO	YES	BBA	0	0	1	1
ENSMUSG00000019890	Nts	0.0321472	3.16719	0.0101501	98.5215	NO	YES	NO	BAB	0	1	0	1
ENSMUSG00000019894	Slc6a15	3.20045	1.77252	1.80559	0.553836	YES	NO	NO	ABB	1	0	0	0
ENSMUSG00000019897	Ccdc59	36.0691	38.927	0.926585	1.07923	NO	YES	NO	BAB	0	1	0	1
ENSMUSG00000019899	Lama2	0.342449	4.66543	0.0734014	13.6237	NO	YES	YES	BAA	0	1	1	2
ENSMUSG00000019907	Ppp1r12a	36.1543	26.7621	1.35095	0.740218	YES	YES	YES	AAA	1	2	1	3
ENSMUSG00000019917	Septin10	33.7137	24.8061	1.35909	0.735787	NO	NO	NO	BBB	0	0	0	0
ENSMUSG00000019923	Zwint	235.269	220.53	1.06684	0.937351	NO	YES	NO	BAB	0	1	0	1
ENSMUSG00000019927	Ube2d1	104.559	101.451	1.03064	0.970273	NO	YES	NO	BAB	0	2	0	2
ENSMUSG00000019932	Kera	1.44142	2.99033	0.482025	2.07458	NO	YES	NO	BAB	0	1	0	1
ENSMUSG00000019948	Actr6	21.6276	24.0021	0.901071	1.10979	NO	YES	YES	BAA	0	1	1	2
ENSMUSG00000019951	Uhrf1bp1l	15.0587	14.1576	1.06365	0.940159	NO	YES	NO	BAB	0	1	0	1
ENSMUSG00000019952	Poc1b	27.1786	37.8798	0.717497	1.39373	YES	NO	NO	ABB	1	0	0	0
ENSMUSG00000019969	Psen1	58.9277	42.1235	1.39893	0.714833	NO	NO	YES	BBA	0	0	2	2
ENSMUSG00000019971	Cep290	5.7216	3.81155	1.50112	0.666169	NO	YES	YES	BAA	0	1	1	2
ENSMUSG00000019975	Ikbip	17.0399	20.8088	0.818879	1.22118	NO	NO	NO	BBB	0	0	0	0
ENSMUSG00000019977	Hbs1l	44.0581	44.6837	0.985997	1.0142	NO	NO	YES	BBA	0	0	1	1
ENSMUSG00000019978	Epb4.1l2	23.1272	80.6455	0.286776	3.48704	NO	NO	NO	BBB	0	0	0	0
ENSMUSG00000019979	Apaf1	17.4089	22.0972	0.787833	1.26931	YES	NO	YES	ABA	2	0	1	1
ENSMUSG00000019986	Ahi1	7.08954	11.2081	0.632537	1.58093	YES	NO	YES	ABA	1	0	1	1
ENSMUSG00000019988	Nedd1	27.2212	32.5108	0.837297	1.19432	NO	NO	YES	BBA	0	0	1	1
ENSMUSG00000019992	Mtfr2	8.9765	9.23363	0.972153	1.02864	NO	NO	YES	BBA	0	0	3	3
ENSMUSG00000019997	Ctgf	7.47793	6.23252	1.19982	0.833455	YES	YES	YES	AAA	1	2	1	3
ENSMUSG00000019998	Stx7	21.0282	24.5931	0.855042	1.16953	YES	YES	NO	AAB	2	1	0	1
ENSMUSG00000020003	Pex7	21.4994	9.86105	2.18023	0.458667	YES	NO	NO	ABB	1	0	0	0
ENSMUSG00000020009	Ifngr1	10.1578	18.5828	0.546621	1.82942	NO	NO	NO	BBB	0	0	0	0
ENSMUSG00000020018	Snrpf	103.893	98.9706	1.04974	0.95262	YES	NO	NO	ABB	3	0	0	0
ENSMUSG00000020019	Ntn4	11.2429	1.0551	10.6558	0.0938455	NO	YES	YES	BAA	0	1	2	3
ENSMUSG00000020021	Fgd6	9.23375	6.92099	1.33417	0.749532	YES	YES	YES	AAA	1	1	1	2
ENSMUSG00000020027	Socs2	78.0603	13.2363	5.89742	0.169566	YES	YES	YES	AAA	1	1	1	2
ENSMUSG00000020034	Tcp11l2	1.5148	3.32028	0.456228	2.19189	NO	NO	NO	BBB	0	0	0	0
ENSMUSG00000020048	Hsp90b1	682.367	702.328	0.971579	1.02925	YES	NO	NO	ABB	1	0	0	0
ENSMUSG00000020056	Ccdc53	29.093	29.6832	0.980117	1.02029	NO	NO	NO	BBB	0	0	0	0
ENSMUSG00000020063	Sirt1	28.7092	33.1873	0.865065	1.15598	YES	YES	NO	AAB	1	3	0	3
ENSMUSG00000020064	Herc4	31.3238	27.6767	1.13178	0.883567	YES	YES	YES	AAA	1	1	1	2
ENSMUSG00000020069	Hnrnph3	79.1086	112.718	0.701829	1.42485	NO	YES	NO	BAB	0	1	0	1
ENSMUSG00000020070	Rufy2	11.9258	11.028	1.0814	0.924723	NO	NO	NO	BBB	0	0	0	0
ENSMUSG00000020072	Pbld1	1.99418	1.07646	1.85253	0.539802	YES	NO	NO	ABB	1	0	0	0
ENSMUSG00000020074	Ccar1	73.1282	80.1131	0.912812	1.09552	YES	YES	YES	AAA	1	1	1	2
ENSMUSG00000020075	Ddx21	84.4078	74.0738	1.13951	0.877571	YES	NO	NO	ABB	1	0	0	0
ENSMUSG00000020076	Ddx50	65.3	85.8475	0.760651	1.31466	YES	NO	YES	ABA	1	0	2	2
ENSMUSG00000020077	Srgn	0.285539	4.73517	0.0603017	16.5833	YES	YES	YES	AAA	2	2	1	3
ENSMUSG00000020078	Vps26a	37.5977	38.8307	0.968247	1.03279	YES	YES	NO	AAB	1	3	0	3
ENSMUSG00000020079	Supv3l1	25.6743	27.9972	0.917031	1.09048	NO	NO	NO	BBB	0	0	0	0
ENSMUSG00000020087	Tysnd1	23.7134	27.5243	0.861541	1.16071	YES	NO	NO	ABB	1	0	0	0
ENSMUSG00000020088	Sar1a	136.593	146.09	0.934997	1.06952	NO	NO	NO	BBB	0	0	0	0
ENSMUSG00000020089	Ppa1	149.68	171.412	0.873217	1.14519	YES	YES	NO	AAB	1	2	0	2
ENSMUSG00000020091	Eif4ebp2	109.757	94.1255	1.16607	0.857579	NO	YES	NO	BAB	0	1	0	1
ENSMUSG00000020097	Sgpl1	111.894	66.1453	1.69164	0.591144	NO	NO	YES	BBA	0	0	1	1
ENSMUSG00000020101	4632428N05Rik	2.37129	2.59242	0.914703	1.09325	NO	NO	NO	BBB	0	0	0	0
ENSMUSG00000020114	Cand1	132.917	137.618	0.96584	1.03537	NO	NO	YES	BBA	0	0	2	2
ENSMUSG00000020115	Tbk1	16.4177	15.0834	1.08846	0.918725	YES	YES	NO	AAB	4	1	0	1
ENSMUSG00000020116	Pno1	95.4045	68.6	1.39074	0.719043	NO	YES	NO	BAB	0	1	0	1
ENSMUSG00000020120	Plek	0.767957	7.99925	0.0960037	10.4163	NO	NO	NO	BBB	0	0	0	0
ENSMUSG00000020123	Avpr1a	0.032223	3.01971	0.0106709	93.7129	YES	NO	NO	ABB	2	0	0	0
ENSMUSG00000020124	Usp15	35.9417	32.7911	1.09608	0.912342	NO	YES	NO	BAB	0	1	0	1
ENSMUSG00000020128	Vps54	57.5802	36.2735	1.58739	0.629965	NO	YES	YES	BAA	0	1	2	3
ENSMUSG00000020130	Tbc1d15	27.1322	28.9178	0.938254	1.06581	NO	NO	NO	BBB	0	0	0	0
ENSMUSG00000020131	Pcsk4	2.89924	2.67034	1.08572	0.92105	YES	NO	NO	ABB	1	0	0	0
ENSMUSG00000020132	Rab21	33.9374	25.5446	1.32855	0.752699	NO	YES	NO	BAB	0	1	0	1
ENSMUSG00000020133	2310011J03Rik	46.5341	40.1099	1.16017	0.861946	NO	YES	NO	BAB	0	3	0	3
ENSMUSG00000020134	Peli1	47.1166	49.0698	0.960195	1.04145	NO	YES	YES	BAA	0	1	1	2
ENSMUSG00000020137	Thap2	15.0591	15.8881	0.947821	1.05505	NO	NO	NO	BBB	0	0	0	0
ENSMUSG00000020140	Lgr5	5.14631	7.49614	0.686528	1.4566	YES	YES	NO	AAB	2	1	0	1
ENSMUSG00000020142	Slc1a4	9.56235	9.57999	0.998158	1.00185	YES	NO	YES	ABA	1	0	3	3
ENSMUSG00000020149	Rab1	212.041	195.815	1.08287	0.923476	NO	NO	NO	BBB	0	0	0	0
ENSMUSG00000020150	Gamt	1.89656	6.95508	0.272686	3.66722	NO	YES	NO	BAB	0	1	0	1
ENSMUSG00000020152	Actr2	123.337	118.467	1.0411	0.96052	NO	NO	YES	BBA	0	0	3	3
ENSMUSG00000020153	Ndufs7	104.21	110.579	0.942407	1.06111	NO	YES	YES	BAA	0	1	1	2
ENSMUSG00000020156	Mum1	54.5103	69.8975	0.779861	1.28228	YES	YES	YES	AAA	1	2	1	3
ENSMUSG00000020159	Gabrp	91.3333	0.0210238	4344.28	0.000230188	NO	NO	YES	BBA	0	0	1	1
ENSMUSG00000020163	Uqcr11	306.248	251.709	1.21667	0.821912	NO	YES	NO	BAB	0	1	0	1
ENSMUSG00000020173	Cobl	4.58794	2.16102	2.12304	0.471022	YES	NO	YES	ABA	3	0	2	2
ENSMUSG00000020175	Rab36	4.44165	10.2718	0.432413	2.3126	YES	NO	NO	ABB	1	0	0	0
ENSMUSG00000020180	Snrpd3	151.546	151.487	1.00039	0.999608	NO	YES	NO	BAB	0	1	0	1
ENSMUSG00000020181	Nav3	2.62599	1.41619	1.85426	0.539298	YES	YES	YES	AAA	1	1	2	3
ENSMUSG00000020185	E2f7	24.7983	20.6145	1.20295	0.831289	YES	YES	YES	AAA	2	2	1	3
ENSMUSG00000020196	Cabin1	19.9799	18.6542	1.07107	0.933646	YES	NO	NO	ABB	1	0	0	0
ENSMUSG00000020198	Ap3d1	39.6222	41.6814	0.950598	1.05197	NO	NO	YES	BBA	0	0	3	3
ENSMUSG00000020211	Sf3a2	77.1799	84.7414	0.91077	1.09797	YES	YES	NO	AAB	1	3	0	3
ENSMUSG00000020218	Wif1	1.89027	16.3829	0.11538	8.66698	YES	YES	YES	AAA	1	2	1	3
ENSMUSG00000020219	Timm13	80.9958	90.205	0.897908	1.1137	YES	YES	NO	AAB	1	2	0	2
ENSMUSG00000020220	Vps13d	12.7681	13.7004	0.931952	1.07302	YES	NO	NO	ABB	1	0	0	0
ENSMUSG00000020225	Tmbim4	41.9839	34.2645	1.22529	0.816135	NO	NO	YES	BBA	0	0	1	1
ENSMUSG00000020228	Helb	12.4593	5.9607	2.09025	0.478412	NO	YES	YES	BAA	0	1	2	3
ENSMUSG00000020230	Prmt2	37.1321	28.2249	1.31558	0.760123	NO	YES	NO	BAB	0	1	0	1
ENSMUSG00000020232	Hmg20b	73.908	90.2696	0.818747	1.22138	NO	YES	NO	BAB	0	1	0	1
ENSMUSG00000020235	Fzr1	74.4875	85.8702	0.867443	1.15281	NO	NO	NO	BBB	0	0	0	0
ENSMUSG00000020238	Ncln	60.7591	76.8522	0.790596	1.26487	NO	NO	NO	BBB	0	0	0	0
ENSMUSG00000020241	Col6a2	1.35588	45.6221	0.0297199	33.6475	YES	YES	NO	AAB	1	1	0	1
ENSMUSG00000020246	Hcfc2	12.4115	20.1605	0.615638	1.62433	NO	NO	NO	BBB	0	0	0	0
ENSMUSG00000020251	Glt8d2	0.103067	9.66494	0.010664	93.7737	YES	YES	NO	AAB	1	1	0	1
ENSMUSG00000020253	Ppm1m	15.5681	38.6288	0.403019	2.48127	NO	YES	NO	BAB	0	1	0	1
ENSMUSG00000020255	D10Wsu102e	50.7162	39.0304	1.2994	0.769584	NO	YES	YES	BAA	0	1	1	2
ENSMUSG00000020257	Wdr82	102.918	166.827	0.616914	1.62097	NO	NO	NO	BBB	0	0	0	0
ENSMUSG00000020258	Glyctk	1.26636	2.14443	0.590537	1.69337	YES	YES	YES	AAA	1	2	1	3
ENSMUSG00000020261	Slc36a1	9.13846	5.06119	1.80559	0.553834	NO	NO	YES	BBA	0	0	3	3
ENSMUSG00000020263	Appl2	25.6112	28.5677	0.896512	1.11543	NO	YES	NO	BAB	0	1	0	1
ENSMUSG00000020265	Sumo3	449.98	352.258	1.27741	0.782831	YES	NO	YES	ABA	1	0	1	1
ENSMUSG00000020267	Hint1	553.526	724.403	0.764113	1.30871	NO	NO	NO	BBB	0	0	0	0
ENSMUSG00000020268	Lyrm7	3.93001	5.20719	0.754727	1.32498	NO	YES	YES	BAA	0	1	1	2
ENSMUSG00000020273	Papolg	15.3687	18.1421	0.847125	1.18046	YES	YES	YES	AAA	1	1	1	2
ENSMUSG00000020277	Pfkl	156.376	89.258	1.75196	0.570791	YES	YES	NO	AAB	2	1	0	1
ENSMUSG00000020280	Pus10	38.7607	35.24	1.09991	0.909168	NO	NO	YES	BBA	0	0	3	3
ENSMUSG00000020282	Rhbdf1	29.7537	12.239	2.43105	0.411344	NO	YES	NO	BAB	0	2	0	2
ENSMUSG00000020283	Pex13	25.1396	26.3823	0.952896	1.04943	NO	NO	NO	BBB	0	0	0	0
ENSMUSG00000020284	1810043G02Rik	12.8028	16.3483	0.783126	1.27693	NO	YES	NO	BAB	0	1	0	1
ENSMUSG00000020287	Mpg	25.6295	26.405	0.970629	1.03026	NO	YES	NO	BAB	0	1	0	1
ENSMUSG00000020288	Ahsa2	57.7425	80.6645	0.715835	1.39697	NO	NO	YES	BBA	0	0	1	1
ENSMUSG00000020289	Nprl3	21.4305	24.0526	0.890987	1.12235	NO	YES	NO	BAB	0	1	0	1
ENSMUSG00000020290	Xpo1	202.898	202.716	1.0009	0.999102	YES	NO	NO	ABB	1	0	0	0
ENSMUSG00000020297	Nsg2	1.54339	6.1135	0.252456	3.96109	YES	YES	NO	AAB	1	2	0	2
ENSMUSG00000020300	Cpeb4	4.35269	4.19954	1.03647	0.964816	YES	NO	NO	ABB	1	0	0	0
ENSMUSG00000020305	Asb3	13.4934	14.632	0.922183	1.08438	NO	NO	NO	BBB	0	0	0	0
ENSMUSG00000020307	Cdc34	223.834	180.378	1.24092	0.805856	NO	NO	YES	BBA	0	0	1	1
ENSMUSG00000020308	Tpgs1	23.2681	33.0061	0.704964	1.41851	NO	NO	YES	BBA	0	0	1	1
ENSMUSG00000020309	Chac2	6.23849	8.98241	0.694523	1.43984	YES	NO	NO	ABB	1	0	0	0
ENSMUSG00000020310	Madcam1	0.857683	3.21395	0.266862	3.74725	NO	YES	NO	BAB	0	2	0	2
ENSMUSG00000020311	Erlec1	26.0076	22.9888	1.13131	0.883927	NO	NO	NO	BBB	0	0	0	0
ENSMUSG00000020312	Shc2	14.4662	22.6193	0.63955	1.5636	NO	YES	NO	BAB	0	1	0	1
ENSMUSG00000020315	Sptbn1	53.6442	47.8125	1.12197	0.891288	NO	NO	NO	BBB	0	0	0	0
ENSMUSG00000020321	Mdh1	453.252	267.812	1.69243	0.590867	NO	NO	YES	BBA	0	0	1	1
ENSMUSG00000020325	Fstl3	2.43474	1.04033	2.34035	0.427287	YES	YES	NO	AAB	1	2	0	2
ENSMUSG00000020326	Ccng1	37.3529	20.0975	1.85859	0.538043	YES	NO	NO	ABB	1	0	0	0
ENSMUSG00000020328	Nudcd2	160.985	192.8	0.834982	1.19763	NO	NO	NO	BBB	0	0	0	0
ENSMUSG00000020329	Polrmt	20.4288	24.4194	0.83658	1.19534	NO	YES	NO	BAB	0	1	0	1
ENSMUSG00000020330	Hmmr	35.5585	48.3981	0.734709	1.36108	NO	NO	NO	BBB	0	0	0	0
ENSMUSG00000020340	Cyfip2	6.99233	5.6823	1.23055	0.812647	YES	NO	YES	ABA	2	0	3	3
ENSMUSG00000020346	Mgat1	26.7013	43.5626	0.612941	1.63148	YES	YES	YES	AAA	1	1	1	2
ENSMUSG00000020354	Sgcd	0.49574	11.0364	0.0449186	22.2625	YES	NO	YES	ABA	1	0	1	1
ENSMUSG00000020357	Flt4	0.0236706	5.77247	0.0041006	243.867	YES	YES	NO	AAB	2	2	0	2
ENSMUSG00000020358	Hnrnpab	945.854	948.602	0.997103	1.00291	NO	NO	NO	BBB	0	0	0	0
ENSMUSG00000020359	Phykpl	5.07507	2.39854	2.1159	0.472612	YES	YES	YES	AAA	1	1	2	3
ENSMUSG00000020361	Hspa4	236.441	204.76	1.15472	0.86601	NO	NO	NO	BBB	0	0	0	0
ENSMUSG00000020362	Cnot6	121.204	110.545	1.09642	0.912057	NO	YES	NO	BAB	0	1	0	1
ENSMUSG00000020363	Gfpt2	4.73534	17.6878	0.267717	3.73528	NO	NO	NO	BBB	0	0	0	0
ENSMUSG00000020364	Zfp354a	6.71224	7.36361	0.911543	1.09704	NO	NO	YES	BBA	0	0	1	1
ENSMUSG00000020366	Mapk9	24.2091	31.2501	0.774691	1.29084	NO	YES	NO	BAB	0	1	0	1
ENSMUSG00000020368	Canx	243.16	239.268	1.01627	0.983991	NO	NO	YES	BBA	0	0	1	1
ENSMUSG00000020372	Gnb2l1	2252.21	2178.13	1.03401	0.96711	NO	NO	NO	BBB	0	0	0	0
ENSMUSG00000020376	Rnf130	41.2948	53.9775	0.765039	1.30712	YES	NO	YES	ABA	4	0	2	2
ENSMUSG00000020380	Rad50	17.3055	15.0354	1.15098	0.868824	NO	NO	NO	BBB	0	0	0	0
ENSMUSG00000020381	3010026O09Rik	14.0576	19.8301	0.708904	1.41063	NO	NO	NO	BBB	0	0	0	0
ENSMUSG00000020385	Clk4	52.4723	49.5018	1.06001	0.943388	NO	YES	NO	BAB	0	1	0	1
ENSMUSG00000020386	Sar1b	61.9658	47.4833	1.305	0.766282	NO	YES	YES	BAA	0	1	1	2
ENSMUSG00000020388	Pdlim4	61.3453	106.278	0.577218	1.73245	YES	YES	YES	AAA	1	2	1	3
ENSMUSG00000020389	Cdkl3	9.95454	8.23815	1.20835	0.827577	NO	YES	YES	BAA	0	1	2	3
ENSMUSG00000020390	Ube2b	146.694	123.378	1.18898	0.84106	NO	NO	NO	BBB	0	0	0	0
ENSMUSG00000020392	Cdkn2aipnl	105.626	96.2122	1.09785	0.910872	NO	YES	NO	BAB	0	1	0	1
ENSMUSG00000020397	Med7	63.7401	71.3674	0.893127	1.11966	YES	NO	NO	ABB	1	0	0	0
ENSMUSG00000020409	Slu7	48.2014	41.5954	1.15882	0.862949	NO	NO	YES	BBA	0	0	1	1
ENSMUSG00000020412	Ascc2	36.5973	30.1751	1.21283	0.824516	NO	YES	YES	BAA	0	2	1	3
ENSMUSG00000020413	Hus1	18.6982	22.8969	0.816624	1.22455	NO	NO	NO	BBB	0	0	0	0
ENSMUSG00000020415	Pttg1	51.2726	62.3389	0.822481	1.21583	YES	YES	NO	AAB	3	1	0	1
ENSMUSG00000020420	Zfp607	5.72816	4.04318	1.41674	0.705844	NO	NO	NO	BBB	0	0	0	0
ENSMUSG00000020430	Pes1	79.3333	67.9216	1.16801	0.856155	NO	NO	NO	BBB	0	0	0	0
ENSMUSG00000020432	Tcn2	29.7415	14.9526	1.98905	0.502753	YES	NO	NO	ABB	2	0	0	0
ENSMUSG00000020440	Arf5	299.414	253.629	1.18052	0.847086	NO	NO	NO	BBB	0	0	0	0
ENSMUSG00000020441	2310033P09Rik	23.0634	28.1118	0.820418	1.21889	NO	YES	NO	BAB	0	1	0	1
ENSMUSG00000020444	Guk1	66.2133	70.6981	0.936564	1.06773	NO	NO	NO	BBB	0	0	0	0
ENSMUSG00000020448	Rnf185	31.3793	35.9703	0.872367	1.14631	YES	NO	YES	ABA	1	0	1	1
ENSMUSG00000020453	Patz1	130.49	84.1782	1.55016	0.645093	NO	NO	YES	BBA	0	0	2	2
ENSMUSG00000020454	Eif4enif1	92.8077	92.5881	1.00237	0.997634	NO	NO	NO	BBB	0	0	0	0
ENSMUSG00000020455	Trim11	13.1479	14.428	0.911276	1.09736	YES	NO	NO	ABB	1	0	0	0
ENSMUSG00000020456	Ogdh	57.123	67.2697	0.849163	1.17763	YES	YES	YES	AAA	1	1	1	2
ENSMUSG00000020457	Drg1	137.491	157.707	0.871817	1.14703	NO	NO	NO	BBB	0	0	0	0
ENSMUSG00000020459	Mtif2	31.6232	27.7152	1.14101	0.876419	NO	NO	NO	BBB	0	0	0	0
ENSMUSG00000020460	Rps27a	77.6466	71.8521	1.08065	0.925373	NO	NO	YES	BBA	0	0	2	2
ENSMUSG00000020462	Cfap36	27.532	35.3588	0.778648	1.28428	NO	NO	NO	BBB	0	0	0	0
ENSMUSG00000020463	Smek2	58.5145	58.1184	1.00682	0.99323	NO	NO	NO	BBB	0	0	0	0
ENSMUSG00000020464	Pnpt1	27.9848	28.8025	0.971609	1.02922	NO	NO	YES	BBA	0	0	1	1
ENSMUSG00000020467	Efemp1	6.79488	18.2761	0.371791	2.68968	NO	NO	YES	BBA	0	0	1	1
ENSMUSG00000020471	Pold2	79.0301	108.734	0.726819	1.37586	NO	YES	NO	BAB	0	2	0	2
ENSMUSG00000020472	Zkscan17	39.8411	42.4881	0.9377	1.06644	NO	YES	NO	BAB	0	2	0	2
ENSMUSG00000020473	Aebp1	1.50438	7.51682	0.200136	4.9966	NO	YES	NO	BAB	0	2	0	2
ENSMUSG00000020474	Polm	12.7817	9.14736	1.39731	0.71566	NO	YES	NO	BAB	0	1	0	1
ENSMUSG00000020475	Pgam2	5.94073	2.42697	2.4478	0.40853	NO	NO	YES	BBA	0	0	1	1
ENSMUSG00000020476	Dbnl	98.2797	91.1307	1.07845	0.927258	NO	NO	YES	BBA	0	0	2	2
ENSMUSG00000020477	Mrps24	67.3948	82.017	0.821717	1.21696	NO	YES	NO	BAB	0	2	0	2
ENSMUSG00000020482	Ccdc117	28.9335	34.7045	0.833709	1.19946	NO	YES	NO	BAB	0	1	0	1
ENSMUSG00000020484	Xbp1	51.1304	86.9315	0.588168	1.70019	YES	NO	YES	ABA	1	0	1	1
ENSMUSG00000020486	Septin4	0.874934	3.06465	0.285493	3.50272	NO	NO	NO	BBB	0	0	0	0
ENSMUSG00000020491	2810021J22Rik	6.73331	8.15742	0.825422	1.2115	NO	NO	YES	BBA	0	0	1	1
ENSMUSG00000020492	Ska2	96.5712	110.741	0.872043	1.14673	NO	NO	NO	BBB	0	0	0	0
ENSMUSG00000020493	Prr11	19.4136	27.645	0.702247	1.424	NO	NO	NO	BBB	0	0	0	0
ENSMUSG00000020495	Smg8	25.9243	27.2729	0.950552	1.05202	NO	NO	NO	BBB	0	0	0	0
ENSMUSG00000020496	Rnf187	211.48	194.168	1.08916	0.918141	YES	NO	NO	ABB	1	0	0	0
ENSMUSG00000020514	Mrpl22	58.0349	63.2261	0.917895	1.08945	YES	NO	NO	ABB	1	0	0	0
ENSMUSG00000020515	Cnot8	69.6794	75.1925	0.926679	1.07912	NO	YES	NO	BAB	0	1	0	1
ENSMUSG00000020516	Rps6kb1	46.1669	45.525	1.0141	0.986096	NO	NO	NO	BBB	0	0	0	0
ENSMUSG00000020521	Rnft1	16.2226	15.0753	1.07611	0.929274	NO	YES	YES	BAA	0	1	2	3
ENSMUSG00000020522	Mfap3	34.3987	33.6341	1.02273	0.977773	YES	NO	YES	ABA	1	0	1	1
ENSMUSG00000020523	Fam114a2	64.273	46.1025	1.39413	0.717292	NO	NO	NO	BBB	0	0	0	0
ENSMUSG00000020525	Ppm1d	26.3778	33.0391	0.798382	1.25253	NO	NO	YES	BBA	0	0	2	2
ENSMUSG00000020526	Znhit3	38.8042	39.4223	0.984321	1.01593	NO	YES	NO	BAB	0	3	0	3
ENSMUSG00000020527	Myo19	9.68656	9.67019	1.00169	0.998311	NO	NO	NO	BBB	0	0	0	0
ENSMUSG00000020528	Prpsap2	26.1083	39.5937	0.659405	1.51652	NO	NO	NO	BBB	0	0	0	0
ENSMUSG00000020530	Ggnbp2	59.8092	57.9197	1.03262	0.968408	NO	NO	NO	BBB	0	0	0	0
ENSMUSG00000020532	Acaca	22.4933	21.7886	1.03234	0.968672	NO	NO	NO	BBB	0	0	0	0
ENSMUSG00000020534	Shmt1	63.4237	60.3054	1.05171	0.950834	NO	YES	NO	BAB	0	1	0	1
ENSMUSG00000020537	Drg2	75.5667	89.8156	0.841353	1.18856	NO	NO	NO	BBB	0	0	0	0
ENSMUSG00000020544	Cox11	30.1153	24.4283	1.2328	0.81116	NO	YES	NO	BAB	0	3	0	3
ENSMUSG00000020546	Stxbp4	25.1686	22.6411	1.11164	0.899575	NO	NO	YES	BBA	0	0	1	1
ENSMUSG00000020547	Bzw2	245.885	223.598	1.09967	0.90936	NO	NO	YES	BBA	0	0	1	1
ENSMUSG00000020553	Pctp	7.17938	9.39889	0.763855	1.30915	NO	YES	NO	BAB	0	1	0	1
ENSMUSG00000020561	Twistnb	20.8086	32.3953	0.642332	1.55683	NO	YES	NO	BAB	0	1	0	1
ENSMUSG00000020564	Atxn7l1	15.7147	20.957	0.749854	1.33359	YES	YES	NO	AAB	3	3	0	3
ENSMUSG00000020572	Nampt	37.1943	28.7968	1.29161	0.774227	YES	YES	YES	AAA	3	1	1	2
ENSMUSG00000020576	Nbas	8.29348	10.3373	0.802287	1.24644	NO	NO	NO	BBB	0	0	0	0
ENSMUSG00000020577	Tspan13	90.1894	27.3405	3.29875	0.303145	YES	NO	YES	ABA	1	0	1	1
ENSMUSG00000020590	Snx13	9.93066	9.6196	1.03234	0.968676	NO	NO	YES	BBA	0	0	1	1
ENSMUSG00000020594	Pum2	117.918	106.683	1.10531	0.904725	NO	YES	YES	BAA	0	1	2	3
ENSMUSG00000020599	Rgs9	5.59451	1.46126	3.82855	0.261196	YES	YES	NO	AAB	3	3	0	3
ENSMUSG00000020601	Trib2	37.4431	33.9936	1.10147	0.907875	NO	YES	YES	BAA	0	1	1	2
ENSMUSG00000020608	Smc6	38.5641	46.5256	0.82888	1.20645	NO	YES	YES	BAA	0	2	1	3
ENSMUSG00000020610	Amz2	72.2267	72.7146	0.99329	1.00676	YES	YES	NO	AAB	1	2	0	2
ENSMUSG00000020611	Gna13	38.9084	35.1452	1.10708	0.903279	YES	YES	YES	AAA	1	1	1	2
ENSMUSG00000020612	Prkar1a	194.968	246.371	0.791361	1.26365	NO	NO	NO	BBB	0	0	0	0
ENSMUSG00000020614	Fam20a	0.177996	2.84664	0.0625284	15.9927	YES	NO	NO	ABB	1	0	0	0
ENSMUSG00000020621	Rdh14	23.6452	19.6518	1.2032	0.831114	NO	NO	NO	BBB	0	0	0	0
ENSMUSG00000020623	Map2k6	47.6517	57.2594	0.832207	1.20162	YES	YES	NO	AAB	2	1	0	1
ENSMUSG00000020627	Klhl29	7.41287	6.4447	1.15023	0.869394	YES	YES	YES	AAA	1	1	2	3
ENSMUSG00000020628	Trappc12	28.3122	26.4802	1.06919	0.935291	NO	NO	NO	BBB	0	0	0	0
ENSMUSG00000020629	Adi1	69.0153	49.2164	1.40228	0.713122	YES	YES	YES	AAA	1	1	2	3
ENSMUSG00000020630	Rnaseh1	17.7967	17.3681	1.02468	0.975913	NO	NO	YES	BBA	0	0	2	2
ENSMUSG00000020634	Ubxn2a	16.4435	11.5491	1.42379	0.70235	NO	NO	NO	BBB	0	0	0	0
ENSMUSG00000020635	Fkbp1b	10.097	7.97321	1.26636	0.789663	NO	YES	NO	BAB	0	2	0	2
ENSMUSG00000020638	Cmpk2	2.85958	3.52267	0.811766	1.23188	YES	NO	YES	ABA	2	0	1	1
ENSMUSG00000020639	Pfn4	2.42962	1.65654	1.46669	0.681809	NO	NO	YES	BBA	0	0	2	2
ENSMUSG00000020642	Rnf144a	40.2486	60.3527	0.666889	1.4995	NO	NO	NO	BBB	0	0	0	0
ENSMUSG00000020647	Ncoa1	7.02293	6.68797	1.05008	0.952304	YES	YES	NO	AAB	2	1	0	1
ENSMUSG00000020648	Dus4l	13.6483	12.581	1.08484	0.921798	NO	NO	NO	BBB	0	0	0	0
ENSMUSG00000020649	Rrm2	199.218	297.36	0.669955	1.49264	YES	YES	YES	AAA	3	1	2	3
ENSMUSG00000020650	Bcap29	26.6985	20.6914	1.29032	0.775004	YES	YES	YES	AAA	1	1	1	2
ENSMUSG00000020652	Cenpo	26.7249	22.2223	1.20262	0.83152	NO	NO	YES	BBA	0	0	2	2
ENSMUSG00000020653	Klf11	11.0765	9.6004	1.15375	0.866736	YES	YES	NO	AAB	2	2	0	2
ENSMUSG00000020654	Adcy3	8.66266	9.76512	0.887102	1.12727	YES	YES	NO	AAB	3	2	0	2
ENSMUSG00000020656	Grhl1	4.07585	0.125752	32.4118	0.0308529	YES	YES	YES	AAA	3	2	1	3
ENSMUSG00000020657	Dnajc27	10.4569	13.2095	0.791624	1.26323	YES	NO	NO	ABB	1	0	0	0
ENSMUSG00000020658	Efr3b	7.16031	10.5717	0.67731	1.47643	YES	YES	NO	AAB	1	1	0	1
ENSMUSG00000020659	Cbll1	21.8063	21.9753	0.992314	1.00775	YES	NO	NO	ABB	1	0	0	0
ENSMUSG00000020660	Pomc	2.96697	3.06095	0.969298	1.03167	YES	YES	NO	AAB	3	2	0	2
ENSMUSG00000020668	Kif3c	16.335	16.2561	1.00486	0.995166	YES	YES	YES	AAA	1	1	1	2
ENSMUSG00000020669	Sh3yl1	12.4533	14.4873	0.8596	1.16333	YES	NO	NO	ABB	1	0	0	0
ENSMUSG00000020671	Rab10	110.814	89.7366	1.23489	0.809792	NO	YES	YES	BAA	0	1	1	2
ENSMUSG00000020674	Pxdn	96.1967	100.899	0.953397	1.04888	YES	NO	YES	ABA	2	0	3	3
ENSMUSG00000020677	Ddx52	46.7159	46.6112	1.00225	0.997759	NO	YES	YES	BAA	0	1	1	2
ENSMUSG00000020680	Taf15	128.334	125.179	1.0252	0.975421	NO	NO	NO	BBB	0	0	0	0
ENSMUSG00000020682	Mmp28	0.237702	4.00071	0.0594151	16.8307	NO	YES	NO	BAB	0	1	0	1
ENSMUSG00000020684	Rasl10b	3.10523	6.15784	0.504272	1.98306	YES	YES	NO	AAB	2	2	0	2
ENSMUSG00000020687	Cdc27	51.3411	74.996	0.684584	1.46074	YES	NO	NO	ABB	1	0	0	0
ENSMUSG00000020689	Itgb3	0.255664	6.10502	0.0418777	23.8791	YES	NO	YES	ABA	2	0	2	2
ENSMUSG00000020691	Mettl2	49.1996	47.2289	1.04173	0.959945	YES	YES	NO	AAB	1	1	0	1
ENSMUSG00000020692	Nle1	26.8664	31.4178	0.855134	1.16941	NO	NO	NO	BBB	0	0	0	0
ENSMUSG00000020694	Tlk2	66.1763	71.3897	0.926973	1.07878	NO	NO	NO	BBB	0	0	0	0
ENSMUSG00000020700	Map3k3	28.956	37.3124	0.776043	1.28859	NO	YES	NO	BAB	0	2	0	2
ENSMUSG00000020705	Ddx42	79.5206	74.3488	1.06956	0.934963	NO	NO	NO	BBB	0	0	0	0
ENSMUSG00000020706	Ftsj3	65.875	57.0755	1.15417	0.866422	NO	NO	NO	BBB	0	0	0	0
ENSMUSG00000020707	Rnf135	5.18075	3.41327	1.51782	0.658838	NO	NO	NO	BBB	0	0	0	0
ENSMUSG00000020708	Psmc5	228.758	237.612	0.962739	1.0387	NO	NO	YES	BBA	0	0	2	2
ENSMUSG00000020716	Nf1	15.2229	16.1694	0.941463	1.06218	NO	YES	YES	BAA	0	1	2	3
ENSMUSG00000020718	Polg2	6.27959	5.98329	1.04952	0.952816	NO	YES	NO	BAB	0	1	0	1
ENSMUSG00000020719	Ddx5	638.06	587.915	1.08529	0.921411	NO	NO	NO	BBB	0	0	0	0
ENSMUSG00000020720	Psmd12	137.278	127.639	1.07552	0.929786	NO	YES	NO	BAB	0	2	0	2
ENSMUSG00000020721	Helz	12.5214	10.9271	1.1459	0.872677	NO	YES	NO	BAB	0	3	0	3
ENSMUSG00000020728	Cep112	4.03435	9.41653	0.428433	2.33409	NO	NO	NO	BBB	0	0	0	0
ENSMUSG00000020737	Hn1	407.774	296.808	1.37386	0.727875	NO	NO	NO	BBB	0	0	0	0
ENSMUSG00000020738	Sumo2	7.22206	7.68553	0.939696	1.06417	NO	NO	NO	BBB	0	0	0	0
ENSMUSG00000020739	Nup85	124.08	135.353	0.916714	1.09085	NO	NO	NO	BBB	0	0	0	0
ENSMUSG00000020740	Gga3	23.3661	21.8742	1.0682	0.936151	NO	NO	NO	BBB	0	0	0	0
ENSMUSG00000020743	Mif4gd	17.3268	9.43488	1.83646	0.544525	NO	NO	NO	BBB	0	0	0	0
ENSMUSG00000020744	Slc25a19	16.0474	18.1246	0.885392	1.12944	YES	YES	NO	AAB	1	1	0	1
ENSMUSG00000020747	2310067B10Rik	40.1997	29.2756	1.37315	0.728254	NO	NO	NO	BBB	0	0	0	0
ENSMUSG00000020752	Recql5	20.9333	16.6782	1.25513	0.796728	NO	YES	YES	BAA	0	1	2	3
ENSMUSG00000020755	Sap30bp	65.3843	55.0191	1.18839	0.841473	NO	NO	NO	BBB	0	0	0	0
ENSMUSG00000020770	Unk	24.9445	30.0933	0.828908	1.20641	NO	YES	NO	BAB	0	2	0	2
ENSMUSG00000020775	Mrpl38	54.377	57.6754	0.942812	1.06066	NO	NO	YES	BBA	0	0	1	1
ENSMUSG00000020776	Fbf1	56.9113	49.9035	1.14043	0.876865	NO	NO	YES	BBA	0	0	1	1
ENSMUSG00000020778	Ten1	54.4443	48.7095	1.11773	0.894667	NO	NO	NO	BBB	0	0	0	0
ENSMUSG00000020780	Srp68	59.7187	73.9332	0.807739	1.23802	NO	NO	YES	BBA	0	0	1	1
ENSMUSG00000020781	Tsen54	27.7032	24.5231	1.12968	0.885209	NO	NO	NO	BBB	0	0	0	0
ENSMUSG00000020783	1200014J11Rik	41.0394	41.9704	0.97782	1.02268	NO	NO	NO	BBB	0	0	0	0
ENSMUSG00000020785	Camkk1	3.85873	5.09736	0.757006	1.32099	YES	YES	NO	AAB	3	2	0	2
ENSMUSG00000020794	Ube2g1	69.6882	68.6697	1.01483	0.985385	YES	YES	YES	AAA	1	2	1	3
ENSMUSG00000020801	Med31	24.6029	20.7594	1.18515	0.843778	NO	YES	NO	BAB	0	1	0	1
ENSMUSG00000020802	Ube2o	29.5323	31.1497	0.948079	1.05476	NO	YES	YES	BAA	0	2	1	3
ENSMUSG00000020803	Txndc17	347.942	123.654	2.81383	0.355387	NO	YES	NO	BAB	0	3	0	3
ENSMUSG00000020807	4933427D14Rik	16.5433	12.9865	1.27388	0.785003	NO	NO	NO	BBB	0	0	0	0
ENSMUSG00000020808	Fam64a	103.471	154.427	0.670032	1.49247	NO	NO	NO	BBB	0	0	0	0
ENSMUSG00000020810	Cygb	0.0677478	4.55055	0.0148878	67.1689	YES	YES	YES	AAA	1	2	1	3
ENSMUSG00000020811	Wscd1	7.92479	1.85685	4.26787	0.234309	NO	YES	NO	BAB	0	3	0	3
ENSMUSG00000020812	1810032O08Rik	28.9227	25.474	1.13538	0.88076	NO	YES	NO	BAB	0	3	0	3
ENSMUSG00000020817	Rabep1	29.5711	30.2812	0.976552	1.02401	NO	NO	YES	BBA	0	0	1	1
ENSMUSG00000020818	Mfsd11	16.0282	19.0022	0.843493	1.18555	NO	YES	YES	BAA	0	2	1	3
ENSMUSG00000020821	Kif1c	66.7508	43.1238	1.54789	0.646042	NO	YES	NO	BAB	0	1	0	1
ENSMUSG00000020828	Pld2	3.02804	1.63004	1.85764	0.538317	YES	NO	NO	ABB	1	0	0	0
ENSMUSG00000020829	Slc46a1	13.1765	9.35659	1.40825	0.710099	NO	YES	NO	BAB	0	3	0	3
ENSMUSG00000020831	0610010K14Rik	84.2163	132.433	0.635915	1.57254	NO	NO	NO	BBB	0	0	0	0
ENSMUSG00000020832	Eral1	21.0884	27.2481	0.77394	1.29209	YES	YES	NO	AAB	1	1	0	1
ENSMUSG00000020834	Dhrs13	14.1589	12.6505	1.11924	0.893463	YES	NO	NO	ABB	1	0	0	0
ENSMUSG00000020838	Slc6a4	2.35497	1.14274	2.06081	0.485246	NO	YES	YES	BAA	0	1	1	2
ENSMUSG00000020840	Blmh	191.648	179.412	1.0682	0.936153	NO	NO	YES	BBA	0	0	2	2
ENSMUSG00000020846	Fam101b	99.3559	40.3323	2.46343	0.405937	NO	NO	NO	BBB	0	0	0	0
ENSMUSG00000020849	Ywhae	1114.74	1080.28	1.0319	0.969087	YES	YES	YES	AAA	1	1	1	2
ENSMUSG00000020850	Prpf8	124.397	107.484	1.15735	0.864041	NO	NO	NO	BBB	0	0	0	0
ENSMUSG00000020857	Nme2	313.394	440.796	0.710972	1.40653	NO	NO	NO	BBB	0	0	0	0
ENSMUSG00000020859	Spag9	23.0595	36.9176	0.62462	1.60097	NO	NO	NO	BBB	0	0	0	0
ENSMUSG00000020863	Luc7l3	119.401	133.665	0.893287	1.11946	YES	NO	NO	ABB	2	0	0	0
ENSMUSG00000020864	Ankrd40	65.9956	71.9802	0.916857	1.09068	YES	YES	NO	AAB	1	2	0	2
ENSMUSG00000020868	Xylt2	20.5653	20.5918	0.998712	1.00129	NO	NO	NO	BBB	0	0	0	0
ENSMUSG00000020869	Lrrc59	152.919	148.179	1.03199	0.969003	NO	NO	NO	BBB	0	0	0	0
ENSMUSG00000020870	Cdc34-ps	18.9714	17.0241	1.11438	0.897358	NO	NO	NO	BBB	0	0	0	0
ENSMUSG00000020877	Scrn2	30.9119	27.7963	1.11209	0.89921	NO	YES	NO	BAB	0	3	0	3
ENSMUSG00000020882	Cacnb1	4.80592	7.54248	0.63718	1.56942	NO	YES	NO	BAB	0	3	0	3
ENSMUSG00000020883	Fbxl20	19.8353	14.8604	1.33478	0.749187	NO	YES	NO	BAB	0	1	0	1
ENSMUSG00000020886	Dlg4	31.7045	45.4642	0.697351	1.434	YES	YES	NO	AAB	2	3	0	3
ENSMUSG00000020888	Dvl2	58.1889	58.9785	0.986612	1.01357	NO	NO	YES	BBA	0	0	2	2
ENSMUSG00000020893	Per1	10.7309	8.97707	1.19537	0.836562	NO	YES	YES	BAA	0	1	1	2
ENSMUSG00000020894	Vamp2	48.6339	44.0092	1.10508	0.904908	NO	YES	YES	BAA	0	1	1	2
ENSMUSG00000020895	Tmem107	20.4801	18.7773	1.09068	0.916858	NO	YES	YES	BAA	0	1	1	2
ENSMUSG00000020897	Aurkb	95.9545	122.987	0.780198	1.28173	NO	NO	NO	BBB	0	0	0	0
ENSMUSG00000020898	Ctc1	56.618	64.646	0.875816	1.14179	NO	NO	NO	BBB	0	0	0	0
ENSMUSG00000020899	Pfas	30.0118	32.0604	0.936101	1.06826	NO	YES	NO	BAB	0	1	0	1
ENSMUSG00000020900	Myh10	96.1589	161.334	0.596023	1.67779	NO	YES	YES	BAA	0	2	1	3
ENSMUSG00000020901	Pik3r5	2.60562	1.16007	2.24609	0.445217	YES	YES	YES	AAA	1	2	1	3
ENSMUSG00000020903	Stx8	36.3991	30.2996	1.20131	0.832426	YES	YES	YES	AAA	1	1	2	3
ENSMUSG00000020905	Usp43	4.47525	0.922735	4.84998	0.206186	NO	NO	YES	BBA	0	0	2	2
ENSMUSG00000020910	Adprm	24.0831	31.2104	0.771637	1.29595	NO	NO	NO	BBB	0	0	0	0
ENSMUSG00000020911	Krt19	53.3209	0.142231	374.89	0.00266745	NO	YES	YES	BAA	0	2	1	3
ENSMUSG00000020914	Top2a	287.481	400.901	0.717086	1.39453	NO	NO	NO	BBB	0	0	0	0
ENSMUSG00000020917	Acly	206.917	149.76	1.38166	0.723766	NO	NO	YES	BBA	0	0	1	1
ENSMUSG00000020918	Kat2a	52.894	52.4676	1.00813	0.991939	YES	YES	NO	AAB	1	1	0	1
ENSMUSG00000020919	Stat5b	5.48342	12.8011	0.428357	2.3345	YES	NO	NO	ABB	1	0	0	0
ENSMUSG00000020921	Tmem101	36.7888	34.8454	1.05577	0.947174	NO	YES	NO	BAB	0	1	0	1
ENSMUSG00000020922	Lsm12	49.4325	66.0922	0.747931	1.33702	NO	NO	NO	BBB	0	0	0	0
ENSMUSG00000020923	Ubtf	128.174	130.172	0.984649	1.01559	YES	NO	YES	ABA	1	0	1	1
ENSMUSG00000020925	Ccdc43	43.1988	42.3847	1.01921	0.981156	NO	YES	YES	BAA	0	2	1	3
ENSMUSG00000020929	Eftud2	122.526	132.42	0.92528	1.08075	NO	YES	NO	BAB	0	1	0	1
ENSMUSG00000020936	Nmt1	61.2961	64.5261	0.949943	1.0527	NO	YES	YES	BAA	0	1	2	3
ENSMUSG00000020948	Klhl28	8.95299	6.21948	1.43951	0.694682	NO	NO	NO	BBB	0	0	0	0
ENSMUSG00000020949	Fkbp3	319.813	382.427	0.836272	1.19578	NO	YES	NO	BAB	0	1	0	1
ENSMUSG00000020950	Foxg1	3.81816	0.0718128	53.1683	0.0188082	NO	YES	NO	BAB	0	3	0	3
ENSMUSG00000020952	Scfd1	35.0144	35.512	0.985988	1.01421	NO	NO	NO	BBB	0	0	0	0
ENSMUSG00000020954	Strn3	68.9276	61.4194	1.12224	0.891072	NO	YES	YES	BAA	0	1	2	3
ENSMUSG00000020955	Ap4s1	40.4569	23.9184	1.69145	0.591208	NO	NO	YES	BBA	0	0	1	1
ENSMUSG00000020956	Dtd2	11.1451	9.89323	1.12654	0.887672	NO	NO	NO	BBB	0	0	0	0
ENSMUSG00000020961	Ston2	49.5904	2.41805	20.5085	0.0487603	YES	YES	NO	AAB	1	3	0	3
ENSMUSG00000020962	Gtf2a1	18.0094	21.1751	0.850498	1.17578	NO	YES	YES	BAA	0	2	1	3
ENSMUSG00000020964	Sel1l	25.757	28.8719	0.892113	1.12093	YES	YES	NO	AAB	1	2	0	2
ENSMUSG00000020973	Dnaaf2	20.2686	25.7043	0.788528	1.26819	NO	NO	NO	BBB	0	0	0	0
ENSMUSG00000020974	Pole2	21.5621	29.0062	0.743363	1.34524	NO	NO	NO	BBB	0	0	0	0
ENSMUSG00000020978	Klhdc2	123.133	149.311	0.824678	1.21259	NO	YES	NO	BAB	0	1	0	1
ENSMUSG00000020982	Nemf	27.2623	20.8756	1.30594	0.765732	YES	YES	NO	AAB	1	1	0	1
ENSMUSG00000020986	Sec23a	26.5472	53.1597	0.499386	2.00246	NO	YES	YES	BAA	0	1	1	2
ENSMUSG00000020988	L2hgdh	17.4813	13.9285	1.25508	0.796763	NO	NO	NO	BBB	0	0	0	0
ENSMUSG00000020993	Trappc6b	34.1116	32.8513	1.03836	0.963054	YES	NO	NO	ABB	1	0	0	0
ENSMUSG00000020994	Pnn	85.3749	94.6535	0.901973	1.10868	NO	YES	YES	BAA	0	1	1	2
ENSMUSG00000021003	Galc	14.5754	9.6775	1.50611	0.663962	NO	YES	YES	BAA	0	1	2	3
ENSMUSG00000021007	Spata7	8.11256	11.746	0.690667	1.44788	YES	YES	NO	AAB	1	1	0	1
ENSMUSG00000021009	Ptpn21	3.76772	2.90671	1.29621	0.771479	YES	YES	NO	AAB	1	1	0	1
ENSMUSG00000021012	Zc3h14	82.3269	74.4166	1.1063	0.903917	NO	NO	NO	BBB	0	0	0	0
ENSMUSG00000021013	Ttc8	20.1472	24.4747	0.823185	1.21479	NO	NO	YES	BBA	0	0	1	1
ENSMUSG00000021018	Polr2h	75.0381	67.1886	1.11683	0.895393	YES	NO	YES	ABA	1	0	1	1
ENSMUSG00000021023	1110008L16Rik	20.0911	12.6753	1.58506	0.630892	NO	NO	YES	BBA	0	0	1	1
ENSMUSG00000021027	Ralgapa1	18.542	14.6708	1.26387	0.791221	NO	NO	YES	BBA	0	0	2	2
ENSMUSG00000021028	Mbip	27.4928	24.6336	1.11607	0.896003	YES	YES	NO	AAB	1	3	0	3
ENSMUSG00000021033	Gstz1	45.0179	32.1524	1.40014	0.714214	NO	NO	NO	BBB	0	0	0	0
ENSMUSG00000021037	Ahsa1	201.9	194.548	1.03779	0.963588	NO	NO	NO	BBB	0	0	0	0
ENSMUSG00000021038	Vipas39	47.8555	44.3678	1.07861	0.927119	NO	NO	NO	BBB	0	0	0	0
ENSMUSG00000021039	Snw1	117.188	111.778	1.0484	0.953837	NO	NO	NO	BBB	0	0	0	0
ENSMUSG00000021040	Slirp	94.8523	100.759	0.941379	1.06227	NO	NO	NO	BBB	0	0	0	0
ENSMUSG00000021044	Adck1	23.2347	17.2683	1.34551	0.743213	YES	YES	YES	AAA	1	1	1	2
ENSMUSG00000021047	Nova1	1.9442	3.31364	0.586727	1.70437	NO	NO	NO	BBB	0	0	0	0
ENSMUSG00000021048	Mthfd1	92.7081	43.9873	2.10761	0.474471	NO	NO	NO	BBB	0	0	0	0
ENSMUSG00000021054	Sgpp1	10.1634	10.7954	0.941452	1.06219	NO	YES	NO	BAB	0	1	0	1
ENSMUSG00000021062	Rab15	111.174	8.30281	13.3899	0.0746831	NO	YES	YES	BAA	0	2	1	3
ENSMUSG00000021065	Fut8	14.9448	21.8417	0.684232	1.46149	NO	NO	YES	BBA	0	0	2	2
ENSMUSG00000021067	Sav1	45.7656	72.5988	0.63039	1.58632	YES	NO	NO	ABB	1	0	0	0
ENSMUSG00000021072	Tmx1	51.1629	49.4604	1.03442	0.966723	YES	YES	NO	AAB	1	2	0	2
ENSMUSG00000021079	Timm9	35.6585	39.2765	0.907883	1.10146	NO	YES	NO	BAB	0	1	0	1
ENSMUSG00000021087	Rtn1	3.00805	8.53071	0.352615	2.83596	YES	NO	NO	ABB	1	0	0	0
ENSMUSG00000021090	Lrrc9	1.75506	1.34908	1.30093	0.768684	YES	NO	NO	ABB	1	0	0	0
ENSMUSG00000021094	Dhrs7	3.56085	3.94756	0.902038	1.1086	NO	NO	NO	BBB	0	0	0	0
ENSMUSG00000021096	Ppm1a	63.8205	65.8307	0.969464	1.0315	YES	YES	NO	AAB	3	1	0	1
ENSMUSG00000021098	4930447C04Rik	3.89397	4.48163	0.868874	1.15091	YES	YES	YES	AAA	3	1	2	3
ENSMUSG00000021109	Hif1a	111.513	101.539	1.09823	0.910558	YES	NO	YES	ABA	1	0	1	1
ENSMUSG00000021111	Papola	196.109	205.645	0.953629	1.04863	YES	YES	YES	AAA	1	2	1	3
ENSMUSG00000021112	Mpp5	22.6932	16.1113	1.40853	0.709962	YES	NO	YES	ABA	1	0	2	2
ENSMUSG00000021113	Snapc1	14.5263	15.5671	0.933141	1.07165	YES	YES	NO	AAB	1	1	0	1
ENSMUSG00000021114	Atp6v1d	71.1759	53.3833	1.3333	0.75002	YES	NO	YES	ABA	1	0	2	2
ENSMUSG00000021116	Eif2s1	86.899	80.0465	1.08561	0.921144	NO	NO	YES	BBA	0	0	1	1
ENSMUSG00000021118	Plek2	4.581	1.77749	2.57723	0.388013	YES	YES	YES	AAA	3	2	1	3
ENSMUSG00000021120	Pigh	17.5852	17.0884	1.02907	0.97175	NO	NO	NO	BBB	0	0	0	0
ENSMUSG00000021123	Rdh12	1.9529	2.19578	0.88939	1.12437	NO	NO	YES	BBA	0	0	1	1
ENSMUSG00000021124	Vti1b	60.1446	55.5686	1.08235	0.923917	NO	NO	NO	BBB	0	0	0	0
ENSMUSG00000021125	Arg2	7.80915	1.24048	6.29525	0.15885	NO	NO	NO	BBB	0	0	0	0
ENSMUSG00000021133	4933426M11Rik	29.1473	16.0626	1.81461	0.551083	NO	NO	NO	BBB	0	0	0	0
ENSMUSG00000021136	Smoc1	7.35459	27.4295	0.268127	3.72957	NO	NO	NO	BBB	0	0	0	0
ENSMUSG00000021139	Gm20498	23.0594	28.5954	0.806402	1.24008	NO	NO	NO	BBB	0	0	0	0
ENSMUSG00000021143	Pacs2	39.2587	32.2264	1.21822	0.820873	NO	YES	NO	BAB	0	2	0	2
ENSMUSG00000021144	Mta1	98.2197	136.48	0.719662	1.38954	NO	YES	NO	BAB	0	3	0	3
ENSMUSG00000021147	Wdr37	17.0098	23.8902	0.711999	1.4045	NO	YES	YES	BAA	0	1	1	2
ENSMUSG00000021149	Gtpbp4	76.2097	62.0656	1.22789	0.814406	YES	NO	YES	ABA	1	0	2	2
ENSMUSG00000021156	Zmynd11	81.4706	87.839	0.927499	1.07817	YES	YES	YES	AAA	1	1	1	2
ENSMUSG00000021171	Esyt2	18.7141	15.8212	1.18285	0.845419	NO	YES	NO	BAB	0	1	0	1
ENSMUSG00000021176	Efcab11	11.5734	15.1128	0.765803	1.30582	NO	YES	YES	BAA	0	1	2	3
ENSMUSG00000021177	Tdp1	40.5072	50.2904	0.805466	1.24152	NO	NO	NO	BBB	0	0	0	0
ENSMUSG00000021179	Nrde2	12.7337	11.6625	1.09185	0.915874	YES	YES	YES	AAA	2	1	2	3
ENSMUSG00000021180	Rps6ka5	3.87774	4.91942	0.788251	1.26863	NO	NO	NO	BBB	0	0	0	0
ENSMUSG00000021188	Trip11	9.59276	7.06703	1.3574	0.736705	NO	NO	NO	BBB	0	0	0	0
ENSMUSG00000021189	Atxn3	13.1238	7.57322	1.73293	0.577058	NO	NO	NO	BBB	0	0	0	0
ENSMUSG00000021190	Lgmn	38.4603	30.2293	1.27228	0.785987	YES	YES	YES	AAA	1	1	1	2
ENSMUSG00000021192	Golga5	30.8552	26.2532	1.17529	0.850851	NO	YES	YES	BAA	0	1	1	2
ENSMUSG00000021193	Pitrm1	76.6748	83.105	0.922625	1.08386	YES	NO	YES	ABA	1	0	1	1
ENSMUSG00000021196	Pfkp	2.4114	3.79724	0.635041	1.5747	YES	NO	YES	ABA	1	0	1	1
ENSMUSG00000021203	Otub2	6.51943	9.87654	0.660093	1.51494	YES	NO	NO	ABB	1	0	0	0
ENSMUSG00000021209	Ppp4r4	2.07138	2.35485	0.879623	1.13685	YES	YES	NO	AAB	1	2	0	2
ENSMUSG00000021217	Tshz3	1.10758	4.24281	0.26105	3.83069	NO	YES	NO	BAB	0	3	0	3
ENSMUSG00000021219	Rgs6	4.7391	0.369778	12.8161	0.078027	YES	YES	YES	AAA	1	1	2	3
ENSMUSG00000021226	Acot2	3.6679	4.40268	0.833107	1.20033	NO	NO	NO	BBB	0	0	0	0
ENSMUSG00000021234	Fam161b	1.86232	3.02072	0.616515	1.62202	NO	NO	NO	BBB	0	0	0	0
ENSMUSG00000021235	Coq6	31.2358	36.5562	0.854461	1.17033	NO	NO	NO	BBB	0	0	0	0
ENSMUSG00000021236	Entpd5	7.00427	5.86532	1.19418	0.837393	NO	NO	NO	BBB	0	0	0	0
ENSMUSG00000021238	Aldh6a1	20.791	16.1149	1.29017	0.775092	NO	NO	YES	BBA	0	0	1	1
ENSMUSG00000021240	Abcd4	5.01379	5.1641	0.970894	1.02998	YES	NO	YES	ABA	1	0	2	2
ENSMUSG00000021242	Npc2	81.0901	88.105	0.920381	1.08651	NO	YES	YES	BAA	0	2	1	3
ENSMUSG00000021243	Fcf1	78.7297	62.9328	1.25101	0.799353	NO	YES	YES	BAA	0	1	1	2
ENSMUSG00000021244	Ylpm1	46.662	46.3668	1.00636	0.993675	NO	YES	NO	BAB	0	1	0	1
ENSMUSG00000021245	Mlh3	9.77947	7.65905	1.27685	0.783177	NO	NO	NO	BBB	0	0	0	0
ENSMUSG00000021252	0610007P14Rik	76.9591	75.3775	1.02098	0.97945	NO	NO	NO	BBB	0	0	0	0
ENSMUSG00000021253	Tgfb3	2.36547	16.9647	0.139435	7.17182	NO	NO	YES	BBA	0	0	1	1
ENSMUSG00000021256	Vash1	15.9392	22.4911	0.708689	1.41106	NO	NO	NO	BBB	0	0	0	0
ENSMUSG00000021257	Angel1	11.4508	9.77101	1.17192	0.853302	NO	NO	NO	BBB	0	0	0	0
ENSMUSG00000021264	Yy1	88.0791	75.9716	1.15937	0.862539	NO	YES	YES	BAA	0	1	2	3
ENSMUSG00000021265	Slc25a29	8.72383	9.64443	0.904546	1.10553	NO	YES	YES	BAA	0	1	1	2
ENSMUSG00000021266	Wars	63.7649	76.7812	0.830475	1.20413	NO	YES	NO	BAB	0	1	0	1
ENSMUSG00000021268	Meg3	59.3761	124.414	0.477247	2.09535	NO	NO	NO	BBB	0	0	0	0
ENSMUSG00000021271	Zfp839	7.69546	6.14365	1.25259	0.798347	NO	YES	YES	BAA	0	1	1	2
ENSMUSG00000021273	Fdft1	41.626	58.8507	0.707316	1.4138	YES	YES	NO	AAB	1	1	0	1
ENSMUSG00000021275	Tecpr2	5.79072	6.6263	0.8739	1.1443	YES	YES	NO	AAB	1	1	0	1
ENSMUSG00000021276	Cinp	27.5651	29.0074	0.950278	1.05232	NO	YES	YES	BAA	0	1	1	2
ENSMUSG00000021282	Eif5	205.88	244.262	0.842865	1.18643	YES	NO	YES	ABA	1	0	1	1
ENSMUSG00000021286	Zfyve21	29.1726	27.0898	1.07689	0.928604	NO	YES	YES	BAA	0	1	1	2
ENSMUSG00000021287	Xrcc3	16.4879	21.2628	0.775435	1.2896	NO	YES	YES	BAA	0	2	1	3
ENSMUSG00000021290	2010107E04Rik	451.768	458.569	0.98517	1.01505	YES	YES	YES	AAA	3	2	1	3
ENSMUSG00000021302	Ggps1	30.4926	36.0195	0.846557	1.18125	NO	YES	NO	BAB	0	1	0	1
ENSMUSG00000021303	Gng4	0.486685	3.5159	0.138424	7.22418	YES	YES	YES	AAA	2	2	1	3
ENSMUSG00000021306	Gpr137b	5.23411	5.02654	1.04129	0.960344	YES	YES	NO	AAB	1	1	0	1
ENSMUSG00000021326	Trim27	125.619	132.618	0.947223	1.05572	NO	YES	NO	BAB	0	2	0	2
ENSMUSG00000021327	Zkscan3	67.5336	68.6573	0.983634	1.01664	NO	YES	YES	BAA	0	1	1	2
ENSMUSG00000021338	Lrrc16a	24.3736	12.9859	1.87693	0.532785	NO	NO	NO	BBB	0	0	0	0
ENSMUSG00000021357	Exoc2	23.4998	22.4466	1.04692	0.955186	YES	NO	NO	ABB	1	0	0	0
ENSMUSG00000021360	Gcnt2	1.8309	2.11279	0.86658	1.15396	YES	YES	YES	AAA	4	1	2	3
ENSMUSG00000021361	Tmem14c	130.702	135.826	0.962277	1.0392	NO	NO	NO	BBB	0	0	0	0
ENSMUSG00000021364	Elovl2	10.6533	15.2627	0.697995	1.43267	YES	NO	NO	ABB	1	0	0	0
ENSMUSG00000021371	Mcur1	5.83901	8.65524	0.674621	1.48231	YES	YES	NO	AAB	2	2	0	2
ENSMUSG00000021374	Nup153	63.1975	57.6714	1.09582	0.912559	NO	YES	YES	BAA	0	2	1	3
ENSMUSG00000021376	Tpmt	27.1978	24.0481	1.13097	0.884193	NO	NO	NO	BBB	0	0	0	0
ENSMUSG00000021377	Dek	293.716	341.158	0.860939	1.16152	NO	YES	YES	BAA	0	1	2	3
ENSMUSG00000021379	Id4	31.5616	9.95006	3.172	0.315258	YES	NO	YES	ABA	2	0	2	2
ENSMUSG00000021385	Ippk	8.3571	10.3914	0.804233	1.24342	YES	NO	YES	ABA	2	0	2	2
ENSMUSG00000021390	Ogn	0.244023	10.3522	0.0235721	42.423	NO	NO	YES	BBA	0	0	1	1
ENSMUSG00000021391	Cenpp	20.7713	34.8848	0.595427	1.67947	NO	NO	NO	BBB	0	0	0	0
ENSMUSG00000021392	Nol8	21.4037	15.5608	1.37549	0.727016	NO	NO	NO	BBB	0	0	0	0
ENSMUSG00000021400	Wrnip1	32.2568	23.0186	1.40133	0.713607	NO	NO	NO	BBB	0	0	0	0
ENSMUSG00000021408	Ripk1	8.841	10.5595	0.837258	1.19438	NO	NO	NO	BBB	0	0	0	0
ENSMUSG00000021411	Pxdc1	1.71114	8.02275	0.213286	4.68853	NO	YES	YES	BAA	0	1	1	2
ENSMUSG00000021413	Prpf4b	68.9635	68.9924	0.99958	1.00042	YES	NO	NO	ABB	1	0	0	0
ENSMUSG00000021417	Eci2	52.4732	105.676	0.496548	2.0139	NO	NO	YES	BBA	0	0	1	1
ENSMUSG00000021423	Ly86	2.87099	3.23137	0.888476	1.12552	YES	YES	YES	AAA	2	1	1	2
ENSMUSG00000021448	Shc3	3.99227	0.225834	17.6778	0.056568	YES	YES	NO	AAB	3	3	0	3
ENSMUSG00000021458	2010111I01Rik	18.5237	23.3891	0.791981	1.26266	NO	NO	NO	BBB	0	0	0	0
ENSMUSG00000021474	Sfxn1	51.1434	60.0075	0.852284	1.17332	NO	YES	NO	BAB	0	1	0	1
ENSMUSG00000021476	Habp4	18.8291	15.7987	1.19181	0.83906	YES	NO	YES	ABA	1	0	2	2
ENSMUSG00000021481	Zfp346	29.9544	32.8848	0.910891	1.09783	NO	YES	NO	BAB	0	1	0	1
ENSMUSG00000021482	Aaed1	19.9663	14.7133	1.35702	0.736908	NO	NO	YES	BBA	0	0	1	1
ENSMUSG00000021484	Lman2	83.0354	59.0021	1.40733	0.710566	NO	NO	NO	BBB	0	0	0	0
ENSMUSG00000021485	Mxd3	7.04132	37.8702	0.185933	5.37828	NO	YES	NO	BAB	0	1	0	1
ENSMUSG00000021486	Prelid1	273.771	238.244	1.14912	0.870229	NO	NO	NO	BBB	0	0	0	0
ENSMUSG00000021488	Nsd1	39.1774	39.6898	0.987092	1.01308	YES	YES	NO	AAB	2	1	0	1
ENSMUSG00000021494	Ddx41	41.1991	51.8336	0.794835	1.25812	NO	NO	NO	BBB	0	0	0	0
ENSMUSG00000021495	Fam193b	31.7681	31.6271	1.00446	0.99556	NO	NO	NO	BBB	0	0	0	0
ENSMUSG00000021496	Pcbd2	20.6036	25.1879	0.817996	1.2225	NO	YES	NO	BAB	0	1	0	1
ENSMUSG00000021497	Txndc15	39.6176	63.0111	0.62874	1.59048	NO	NO	NO	BBB	0	0	0	0
ENSMUSG00000021500	Ddx46	61.7454	52.3798	1.1788	0.848319	NO	YES	YES	BAA	0	1	2	3
ENSMUSG00000021501	Caml	30.3872	43.8567	0.692874	1.44326	NO	YES	NO	BAB	0	1	0	1
ENSMUSG00000021504	B4galt7	17.6531	20.8406	0.847052	1.18056	NO	YES	NO	BAB	0	1	0	1
ENSMUSG00000021510	A530054K11Rik	7.38066	6.46038	1.14245	0.875312	NO	NO	NO	BBB	0	0	0	0
ENSMUSG00000021514	Zfp369	16.3249	12.0797	1.35143	0.739955	NO	NO	YES	BBA	0	0	1	1
ENSMUSG00000021518	Ptdss1	26.7132	29.742	0.898164	1.11338	NO	NO	NO	BBB	0	0	0	0
ENSMUSG00000021519	Mterf3	46.7919	53.6424	0.872292	1.1464	NO	NO	YES	BBA	0	0	1	1
ENSMUSG00000021520	Uqcrb	148.873	132.361	1.12475	0.889087	NO	NO	NO	BBB	0	0	0	0
ENSMUSG00000021532	Fastkd3	16.7934	18.5017	0.907665	1.10173	NO	NO	NO	BBB	0	0	0	0
ENSMUSG00000021537	Cetn3	184.808	166.9	1.1073	0.903096	YES	NO	NO	ABB	1	0	0	0
ENSMUSG00000021546	Hnrnpk	1040.33	1129.99	0.920654	1.08618	NO	NO	NO	BBB	0	0	0	0
ENSMUSG00000021548	Ccnh	38.0445	42.2131	0.90125	1.10957	YES	NO	YES	ABA	2	0	1	1
ENSMUSG00000021549	Rasa1	68.3223	73.5744	0.928616	1.07687	NO	NO	NO	BBB	0	0	0	0
ENSMUSG00000021550	2210016F16Rik	18.8687	13.4518	1.40269	0.712915	NO	YES	YES	BAA	0	1	1	2
ENSMUSG00000021552	Gkap1	21.3527	13.0634	1.63454	0.611793	YES	NO	YES	ABA	1	0	1	1
ENSMUSG00000021557	Agtpbp1	2.87294	11.2841	0.254601	3.92772	NO	YES	YES	BAA	0	1	1	2
ENSMUSG00000021567	Nkd2	2.01681	39.6707	0.0508389	19.67	NO	YES	NO	BAB	0	1	0	1
ENSMUSG00000021569	Trip13	39.0178	45.2131	0.862974	1.15878	NO	NO	NO	BBB	0	0	0	0
ENSMUSG00000021572	Cep72	9.79087	10.2251	0.957529	1.04435	YES	YES	YES	AAA	1	1	1	2
ENSMUSG00000021576	Pdcd6	69.6843	56.2172	1.23956	0.806741	YES	NO	NO	ABB	2	0	0	0
ENSMUSG00000021577	Sdha	139.266	183.835	0.757562	1.32002	YES	NO	NO	ABB	1	0	0	0
ENSMUSG00000021578	Ccdc127	43.0489	48.056	0.895806	1.11631	NO	NO	NO	BBB	0	0	0	0
ENSMUSG00000021583	Erap1	6.78334	1.99724	3.39635	0.294434	NO	NO	NO	BBB	0	0	0	0
ENSMUSG00000021585	Cast	10.2203	10.4537	0.977679	1.02283	YES	YES	NO	AAB	2	1	0	1
ENSMUSG00000021589	Rhobtb3	52.9319	81.1137	0.652564	1.53242	NO	YES	YES	BAA	0	2	1	3
ENSMUSG00000021591	Glrx	19.1166	12.5125	1.5278	0.654534	YES	YES	NO	AAB	2	1	0	1
ENSMUSG00000021592	Arsk	7.04588	6.14508	1.14659	0.872153	NO	NO	NO	BBB	0	0	0	0
ENSMUSG00000021595	Nsun2	127.822	94.2277	1.35652	0.737178	YES	NO	YES	ABA	2	0	1	1
ENSMUSG00000021597	Ankrd32	19.0071	26.3419	0.721554	1.3859	NO	NO	NO	BBB	0	0	0	0
ENSMUSG00000021598	Med10	102.444	92.8812	1.10295	0.906657	NO	YES	YES	BAA	0	1	1	2
ENSMUSG00000021610	Clptm1l	62.831	51.4704	1.22072	0.819189	NO	NO	NO	BBB	0	0	0	0
ENSMUSG00000021611	Tert	9.21973	6.94397	1.32773	0.753164	YES	NO	NO	ABB	1	0	0	0
ENSMUSG00000021613	Hapln1	34.2429	7.59234	4.51018	0.22172	NO	YES	YES	BAA	0	2	1	3
ENSMUSG00000021614	Vcan	77.3492	115.032	0.672415	1.48718	NO	YES	YES	BAA	0	1	2	3
ENSMUSG00000021615	Xrcc4	11.0354	9.08389	1.21483	0.82316	NO	YES	NO	BAB	0	2	0	2
ENSMUSG00000021621	Zcchc9	30.2851	34.0752	0.888772	1.12515	NO	NO	NO	BBB	0	0	0	0
ENSMUSG00000021629	Slc30a5	30.4879	33.86	0.900412	1.1106	NO	NO	NO	BBB	0	0	0	0
ENSMUSG00000021631	Mrps36-ps1	3.99916	2.84243	1.40695	0.710757	NO	NO	NO	BBB	0	0	0	0
ENSMUSG00000021635	Rad17	21.021	25.0986	0.837539	1.19397	NO	NO	NO	BBB	0	0	0	0
ENSMUSG00000021639	Gtf2h2	37.9143	39.9815	0.948294	1.05453	NO	YES	NO	BAB	0	2	0	2
ENSMUSG00000021643	Serf1	155.664	181.388	0.858183	1.16525	NO	NO	NO	BBB	0	0	0	0
ENSMUSG00000021645	Smn1	83.013	88.2056	0.941131	1.06255	NO	NO	NO	BBB	0	0	0	0
ENSMUSG00000021646	Mccc2	30.24	29.3618	1.02991	0.970957	YES	NO	YES	ABA	1	0	1	1
ENSMUSG00000021650	Ptcd2	26.8401	31.77	0.844826	1.18368	NO	NO	YES	BBA	0	0	1	1
ENSMUSG00000021660	Btf3	476.51	447.948	1.06376	0.940061	YES	YES	NO	AAB	1	2	0	2
ENSMUSG00000021661	Ankra2	22.8919	14.0377	1.63075	0.613216	NO	NO	NO	BBB	0	0	0	0
ENSMUSG00000021665	Hexb	23.3631	11.1026	2.1043	0.475218	YES	YES	YES	AAA	3	1	2	3
ENSMUSG00000021666	Gfm2	31.7124	22.8187	1.38975	0.719554	YES	NO	NO	ABB	1	0	0	0
ENSMUSG00000021668	Polk	5.95821	4.71262	1.26431	0.790944	NO	NO	YES	BBA	0	0	1	1
ENSMUSG00000021669	Col4a3bp	19.367	14.946	1.2958	0.771723	NO	NO	YES	BBA	0	0	3	3
ENSMUSG00000021670	Hmgcr	71.4364	93.1296	0.767065	1.30367	NO	NO	YES	BBA	0	0	2	2
ENSMUSG00000021671	Poc5	13.9101	16.1791	0.859759	1.16312	YES	NO	NO	ABB	1	0	0	0
ENSMUSG00000021681	Aggf1	44.1916	40.9405	1.07941	0.926432	YES	YES	NO	AAB	3	3	0	3
ENSMUSG00000021686	Ap3b1	38.1014	29.3778	1.29694	0.771044	YES	YES	YES	AAA	1	1	2	3
ENSMUSG00000021690	Jmy	18.0736	13.8307	1.30677	0.765246	NO	NO	YES	BBA	0	0	3	3
ENSMUSG00000021692	Dimt1	9.27571	7.13414	1.30019	0.769121	NO	NO	NO	BBB	0	0	0	0
ENSMUSG00000021693	Kif2a	33.0769	45.1598	0.732441	1.3653	YES	YES	YES	AAA	2	2	1	3
ENSMUSG00000021694	Ercc8	20.3139	23.2627	0.873242	1.14516	NO	NO	NO	BBB	0	0	0	0
ENSMUSG00000021699	Pde4d	5.75121	17.4619	0.329358	3.03621	NO	NO	NO	BBB	0	0	0	0
ENSMUSG00000021704	Mtx3	11.5653	12.6274	0.915889	1.09184	NO	NO	NO	BBB	0	0	0	0
ENSMUSG00000021706	Zfyve16	13.5538	15.1391	0.895287	1.11696	NO	NO	NO	BBB	0	0	0	0
ENSMUSG00000021707	Dhfr	24.625	31.5624	0.780203	1.28172	NO	NO	NO	BBB	0	0	0	0
ENSMUSG00000021709	Erbb2ip	82.1564	85.9571	0.955783	1.04626	NO	NO	NO	BBB	0	0	0	0
ENSMUSG00000021711	Trappc13	41.8591	40.0885	1.04417	0.9577	NO	NO	NO	BBB	0	0	0	0
ENSMUSG00000021712	Trim23	24.2553	26.2383	0.924422	1.08176	NO	NO	NO	BBB	0	0	0	0
ENSMUSG00000021713	Ppwd1	22.0268	22.6159	0.973954	1.02674	NO	NO	NO	BBB	0	0	0	0
ENSMUSG00000021714	Cenpk	42.5853	45.225	0.941632	1.06199	YES	NO	NO	ABB	1	0	0	0
ENSMUSG00000021715	Cwc27	21.7356	25.2367	0.861268	1.16108	NO	YES	NO	BAB	0	1	0	1
ENSMUSG00000021716	Srek1ip1	37.411	31.9859	1.16961	0.854987	NO	YES	NO	BAB	0	1	0	1
ENSMUSG00000021720	Rnf180	8.93119	5.83031	1.53185	0.652803	YES	YES	NO	AAB	1	1	0	1
ENSMUSG00000021725	Parp8	9.68032	10.5957	0.913605	1.09457	NO	YES	NO	BAB	0	1	0	1
ENSMUSG00000021731	Mrps30	51.3108	53.0309	0.967564	1.03352	NO	NO	NO	BBB	0	0	0	0
ENSMUSG00000021732	Fgf10	1.36526	14.6178	0.0933968	10.707	NO	YES	NO	BAB	0	1	0	1
ENSMUSG00000021733	Slc4a7	21.247	16.3289	1.3012	0.768524	NO	YES	YES	BAA	0	2	1	3
ENSMUSG00000021737	Psmd6	141.98	169.296	0.838647	1.1924	YES	YES	NO	AAB	2	2	0	2
ENSMUSG00000021748	Pdhb	94.5133	92.8897	1.01748	0.982821	NO	NO	YES	BBA	0	0	1	1
ENSMUSG00000021752	Kctd6	9.75009	10.1101	0.964389	1.03693	YES	NO	NO	ABB	2	0	0	0
ENSMUSG00000021756	Il6st	21.1158	31.034	0.680408	1.46971	YES	YES	YES	AAA	3	1	2	3
ENSMUSG00000021759	Ppap2a	10.5648	17.5147	0.603194	1.65784	NO	NO	NO	BBB	0	0	0	0
ENSMUSG00000021760	Gpx8	106.857	106.725	1.00124	0.998759	NO	NO	NO	BBB	0	0	0	0
ENSMUSG00000021763	BC067074	10.1269	8.56584	1.18224	0.845852	YES	NO	NO	ABB	1	0	0	0
ENSMUSG00000021764	Ndufs4	65.2372	80.9214	0.806179	1.24042	NO	YES	YES	BAA	0	1	1	2
ENSMUSG00000021765	Fst	5.46561	13.8306	0.395184	2.53047	NO	YES	NO	BAB	0	3	0	3
ENSMUSG00000021770	Samd8	18.8738	13.9844	1.34963	0.740945	NO	YES	YES	BAA	0	1	1	2
ENSMUSG00000021771	Vdac2	167.266	159.715	1.04728	0.954854	NO	NO	YES	BBA	0	0	1	1
ENSMUSG00000021772	Nkiras1	7.09098	7.60598	0.932291	1.07263	NO	YES	NO	BAB	0	2	0	2
ENSMUSG00000021773	Comtd1	15.1033	9.71629	1.55443	0.643321	YES	YES	NO	AAB	1	3	0	3
ENSMUSG00000021775	Nr1d2	6.46643	4.97865	1.29883	0.769923	NO	NO	NO	BBB	0	0	0	0
ENSMUSG00000021785	Ngly1	13.2897	16.5389	0.803541	1.24449	NO	NO	NO	BBB	0	0	0	0
ENSMUSG00000021794	Glud1	98.0079	118.162	0.829434	1.20564	NO	NO	NO	BBB	0	0	0	0
ENSMUSG00000021796	Bmpr1a	92.163	87.0922	1.05822	0.944979	NO	YES	NO	BAB	0	3	0	3
ENSMUSG00000021806	Nid2	0.771008	31.4752	0.0244957	40.8235	YES	NO	YES	ABA	2	0	1	1
ENSMUSG00000021807	2700060E02Rik	134.857	141.083	0.955868	1.04617	NO	NO	YES	BBA	0	0	1	1
ENSMUSG00000021809	Nudt13	4.81349	5.09477	0.94479	1.05844	NO	NO	YES	BBA	0	0	2	2
ENSMUSG00000021810	Ecd	40.076	41.2048	0.972604	1.02817	NO	NO	YES	BBA	0	0	2	2
ENSMUSG00000021811	Dnajc9	142.397	182.865	0.778698	1.28419	YES	NO	NO	ABB	1	0	0	0
ENSMUSG00000021814	Anxa7	22.9167	25.7136	0.89123	1.12204	NO	NO	NO	BBB	0	0	0	0
ENSMUSG00000021816	Ppp3cb	89.7138	83.661	1.07235	0.932533	NO	YES	YES	BAA	0	1	2	3
ENSMUSG00000021819	Zswim8	50.9723	33.0386	1.54281	0.648167	NO	NO	NO	BBB	0	0	0	0
ENSMUSG00000021830	Txndc16	12.455	14.1626	0.879428	1.1371	NO	NO	YES	BBA	0	0	2	2
ENSMUSG00000021831	Ero1l	21.8237	11.4779	1.90137	0.525936	NO	NO	YES	BBA	0	0	2	2
ENSMUSG00000021832	Psmc6	214.24	233.034	0.91935	1.08773	NO	NO	NO	BBB	0	0	0	0
ENSMUSG00000021840	Mapk1ip1l	73.0036	82.2913	0.887137	1.12722	YES	YES	NO	AAB	1	1	0	1
ENSMUSG00000021870	Slmap	35.4284	31.8815	1.11125	0.899884	NO	YES	NO	BAB	0	2	0	2
ENSMUSG00000021871	Pnp	44.1452	42.2551	1.04473	0.957183	NO	NO	NO	BBB	0	0	0	0
ENSMUSG00000021876	Rnase4	48.9596	8.74627	5.59777	0.178643	NO	NO	YES	BBA	0	0	2	2
ENSMUSG00000021877	Arf4	282.44	319.281	0.884613	1.13044	NO	YES	YES	BAA	0	1	1	2
ENSMUSG00000021884	Hacl1	8.16498	12.4715	0.654691	1.52744	NO	NO	NO	BBB	0	0	0	0
ENSMUSG00000021890	Eaf1	33.7281	34.5278	0.976838	1.02371	NO	NO	NO	BBB	0	0	0	0
ENSMUSG00000021891	Mettl6	35.2694	39.8129	0.885879	1.12882	NO	NO	YES	BBA	0	0	1	1
ENSMUSG00000021892	Sh3bp5	33.9295	52.8084	0.642502	1.55642	NO	NO	YES	BBA	0	0	2	2
ENSMUSG00000021893	Capn7	29.4497	27.3034	1.07861	0.927117	NO	NO	YES	BBA	0	0	1	1
ENSMUSG00000021900	Btd	12.9177	19.115	0.675788	1.47975	YES	YES	NO	AAB	1	1	0	1
ENSMUSG00000021901	Bap1	92.143	108.741	0.847365	1.18013	YES	YES	NO	AAB	1	1	0	1
ENSMUSG00000021902	Phf7	7.332	5.55284	1.32041	0.757343	NO	YES	YES	BAA	0	1	1	2
ENSMUSG00000021905	Dph3	59.2125	56.3375	1.05103	0.951447	NO	NO	NO	BBB	0	0	0	0
ENSMUSG00000021906	Oxnad1	22.5658	18.5246	1.21815	0.820917	NO	YES	YES	BAA	0	1	1	2
ENSMUSG00000021908	Gm6768	14.6757	10.7433	1.36603	0.732048	NO	NO	NO	BBB	0	0	0	0
ENSMUSG00000021910	Nisch	238.125	262.097	0.908539	1.10067	NO	NO	NO	BBB	0	0	0	0
ENSMUSG00000021911	Parg	53.1746	49.1253	1.08243	0.923849	NO	NO	NO	BBB	0	0	0	0
ENSMUSG00000021913	Ogdhl	31.1898	22.6166	1.37907	0.725127	NO	YES	YES	BAA	0	2	1	3
ENSMUSG00000021916	Glt8d1	25.5268	26.5403	0.961812	1.0397	NO	NO	NO	BBB	0	0	0	0
ENSMUSG00000021917	Spcs1	152.393	149.166	1.02163	0.978824	NO	NO	NO	BBB	0	0	0	0
ENSMUSG00000021918	Nek4	11.9351	12.1211	0.984658	1.01558	NO	NO	NO	BBB	0	0	0	0
ENSMUSG00000021927	Gm5803	6.64294	8.40006	0.79082	1.26451	NO	NO	NO	BBB	0	0	0	0
ENSMUSG00000021929	Kpna3	73.1317	65.7559	1.11217	0.899143	YES	NO	YES	ABA	1	0	2	2
ENSMUSG00000021930	Spryd7	11.0402	10.3606	1.06559	0.938447	YES	NO	YES	ABA	1	0	1	1
ENSMUSG00000021938	Pspc1	83.4602	82.7311	1.00881	0.991264	NO	NO	YES	BBA	0	0	2	2
ENSMUSG00000021939	Ctsb	63.1325	53.0195	1.19074	0.839813	YES	YES	NO	AAB	2	1	0	1
ENSMUSG00000021943	Gdf10	0.45989	7.49417	0.0613664	16.2956	YES	NO	YES	ABA	1	0	1	1
ENSMUSG00000021945	Zmym2	55.367	43.8631	1.26227	0.792226	NO	NO	YES	BBA	0	0	3	3
ENSMUSG00000021947	Cryl1	26.8445	8.98758	2.98684	0.334802	YES	YES	YES	AAA	4	1	2	3
ENSMUSG00000021950	Anxa8	49.0477	0.0229778	2134.57	0.000468478	YES	YES	NO	AAB	1	2	0	2
ENSMUSG00000021951	N6amt2	56.6445	56.1936	1.00803	0.992039	NO	NO	NO	BBB	0	0	0	0
ENSMUSG00000021958	Pinx1	36.9446	36.1392	1.02229	0.9782	YES	NO	NO	ABB	1	0	0	0
ENSMUSG00000021959	Lats2	16.5418	18.3362	0.902141	1.10847	YES	YES	YES	AAA	1	1	2	3
ENSMUSG00000021962	Dcp1a	26.6323	28.8648	0.922655	1.08383	YES	NO	YES	ABA	1	0	1	1
ENSMUSG00000021963	Sap18	14.3356	15.0673	0.95144	1.05104	NO	NO	YES	BBA	0	0	1	1
ENSMUSG00000021965	Ska3	27.0994	37.1759	0.728951	1.37183	NO	NO	YES	BBA	0	0	1	1
ENSMUSG00000021967	Mrpl57	14.5572	15.3224	0.950062	1.05256	NO	NO	NO	BBB	0	0	0	0
ENSMUSG00000021969	Zdhhc20	37.4354	34.3568	1.08961	0.917763	YES	YES	NO	AAB	2	1	0	1
ENSMUSG00000021972	Hmbox1	41.9303	39.303	1.06685	0.937341	NO	NO	YES	BBA	0	0	2	2
ENSMUSG00000021973	Micu2	80.038	64.835	1.23449	0.810053	YES	YES	NO	AAB	2	2	0	2
ENSMUSG00000021975	Ints9	38.2652	36.5659	1.04647	0.955591	NO	YES	YES	BAA	0	1	2	3
ENSMUSG00000021981	Cab39l	26.8349	30.6446	0.875682	1.14197	NO	YES	YES	BAA	0	1	1	2
ENSMUSG00000021982	Cdadc1	13.3488	15.3657	0.868737	1.1511	YES	NO	YES	ABA	1	0	1	1
ENSMUSG00000021986	Amer2	4.03996	3.9763	1.01601	0.984244	YES	NO	YES	ABA	1	0	2	2
ENSMUSG00000021987	Mtmr6	19.796	20.5312	0.96419	1.03714	NO	NO	YES	BBA	0	0	1	1
ENSMUSG00000021991	Cacna2d3	0.217999	2.98035	0.0731456	13.6714	NO	NO	YES	BBA	0	0	1	1
ENSMUSG00000021994	Wnt5a	36.0026	178.421	0.201784	4.95578	NO	YES	YES	BAA	0	2	1	3
ENSMUSG00000021998	Lcp1	1.88389	22.1866	0.0849112	11.777	NO	NO	NO	BBB	0	0	0	0
ENSMUSG00000022000	Zc3h13	25.13	22.7111	1.10651	0.903744	NO	YES	NO	BAB	0	1	0	1
ENSMUSG00000022003	Slc25a30	8.19236	13.3755	0.612489	1.63268	YES	YES	YES	AAA	1	1	1	2
ENSMUSG00000022008	Gpalpp1	31.0229	19.8729	1.56107	0.640588	YES	YES	YES	AAA	1	1	2	3
ENSMUSG00000022009	Nufip1	17.1224	16.3756	1.04561	0.956383	NO	YES	NO	BAB	0	1	0	1
ENSMUSG00000022013	Dnajc15	57.1498	66.0925	0.864694	1.15648	NO	NO	NO	BBB	0	0	0	0
ENSMUSG00000022016	Akap11	22.6148	25.1764	0.898255	1.11327	YES	YES	YES	AAA	1	1	2	3
ENSMUSG00000022018	Rgcc	3.06248	13.0785	0.234161	4.27056	YES	YES	NO	AAB	2	1	0	1
ENSMUSG00000022020	Naa16	13.3148	14.2503	0.934352	1.07026	YES	NO	NO	ABB	1	0	0	0
ENSMUSG00000022021	Diap3	14.5353	15.2201	0.95501	1.04711	NO	NO	NO	BBB	0	0	0	0
ENSMUSG00000022022	Mtrf1	6.30803	6.45018	0.977963	1.02253	NO	NO	NO	BBB	0	0	0	0
ENSMUSG00000022031	Elp3	81.1714	100.346	0.808915	1.23622	NO	NO	YES	BBA	0	0	1	1
ENSMUSG00000022033	Pbk	74.0363	94.7503	0.781383	1.27978	NO	NO	YES	BBA	0	0	3	3
ENSMUSG00000022034	Esco2	22.9501	24.9996	0.918019	1.0893	NO	YES	NO	BAB	0	1	0	1
ENSMUSG00000022037	Clu	8.67279	8.77987	0.987804	1.01235	YES	NO	NO	ABB	1	0	0	0
ENSMUSG00000022040	Ephx2	2.6394	0.999099	2.64178	0.378532	YES	YES	NO	AAB	1	1	0	1
ENSMUSG00000022043	Trim35	68.1352	100.092	0.680728	1.46902	YES	NO	NO	ABB	2	0	0	0
ENSMUSG00000022048	Dpysl2	14.7019	38.2575	0.384289	2.60221	YES	YES	YES	AAA	1	1	1	2
ENSMUSG00000022051	Bnip3l	86.4493	66.8466	1.29325	0.773247	YES	YES	NO	AAB	1	1	0	1
ENSMUSG00000022054	Nefm	0.601511	4.06508	0.14797	6.75811	NO	YES	YES	BAA	0	2	1	3
ENSMUSG00000022055	Nefl	0.348935	4.05533	0.0860436	11.622	YES	NO	NO	ABB	3	0	0	0
ENSMUSG00000022064	Pibf1	11.1794	12.025	0.929685	1.07563	NO	NO	NO	BBB	0	0	0	0
ENSMUSG00000022070	Bora	27.5621	36.4684	0.755779	1.32314	NO	NO	NO	BBB	0	0	0	0
ENSMUSG00000022074	Tnfrsf10b	5.89599	7.2519	0.813027	1.22997	NO	YES	NO	BAB	0	1	0	1
ENSMUSG00000022075	Rhobtb2	8.52212	13.4798	0.632216	1.58174	YES	NO	NO	ABB	1	0	0	0
ENSMUSG00000022089	Bin3	36.7265	25.1069	1.4628	0.683618	NO	YES	YES	BAA	0	2	1	3
ENSMUSG00000022091	Sorbs3	14.227	29.4892	0.482448	2.07276	YES	YES	YES	AAA	1	2	1	3
ENSMUSG00000022092	Ppp3cc	1.87747	4.396	0.427085	2.34146	YES	NO	YES	ABA	1	0	1	1
ENSMUSG00000022094	Slc39a14	7.54665	11.152	0.676705	1.47775	NO	NO	NO	BBB	0	0	0	0
ENSMUSG00000022095	Fam160b2	24.9752	15.3887	1.62296	0.616157	YES	YES	NO	AAB	2	2	0	2
ENSMUSG00000022096	Hr	12.3193	0.471876	26.1072	0.0383036	NO	YES	NO	BAB	0	2	0	2
ENSMUSG00000022098	Bmp1	34.682	57.3536	0.604705	1.6537	NO	YES	NO	BAB	0	3	0	3
ENSMUSG00000022100	Xpo7	22.2517	20.0516	1.10972	0.901127	NO	YES	NO	BAB	0	1	0	1
ENSMUSG00000022102	Dok2	5.61384	5.27862	1.06351	0.940286	NO	YES	NO	BAB	0	2	0	2
ENSMUSG00000022110	Sucla2	80.8464	80.1189	1.00908	0.991002	NO	NO	NO	BBB	0	0	0	0
ENSMUSG00000022111	Uchl3	70.862	56.8829	1.24575	0.802728	NO	NO	YES	BBA	0	0	1	1
ENSMUSG00000022114	Spry2	39.5107	20.0367	1.97192	0.507121	YES	YES	YES	AAA	2	1	1	2
ENSMUSG00000022119	Rbm26	56.4692	56.8174	0.993872	1.00617	NO	YES	YES	BAA	0	1	1	2
ENSMUSG00000022120	Rnf219	36.5405	39.5569	0.923745	1.08255	NO	YES	NO	BAB	0	2	0	2
ENSMUSG00000022122	Ednrb	3.72104	4.23104	0.879462	1.13706	YES	YES	YES	AAA	2	2	1	3
ENSMUSG00000022124	Fbxl3	38.7573	31.8564	1.21663	0.821945	NO	YES	NO	BAB	0	1	0	1
ENSMUSG00000022125	Cln5	19.8361	20.2014	0.981917	1.01842	YES	NO	YES	ABA	1	0	1	1
ENSMUSG00000022130	Tgds	14.041	13.9519	1.00639	0.993652	NO	YES	YES	BAA	0	1	1	2
ENSMUSG00000022136	Dnajc3	27.3923	22.2044	1.23364	0.810609	YES	NO	NO	ABB	2	0	0	0
ENSMUSG00000022141	Nipbl	31.2503	25.3265	1.2339	0.81044	NO	NO	NO	BBB	0	0	0	0
ENSMUSG00000022142	Nup155	31.5049	31.1368	1.01182	0.988318	NO	NO	NO	BBB	0	0	0	0
ENSMUSG00000022150	Dab2	17.151	59.4955	0.288274	3.46892	NO	YES	NO	BAB	0	1	0	1
ENSMUSG00000022151	Ttc33	31.9818	29.4266	1.08683	0.920104	YES	YES	YES	AAA	1	2	1	3
ENSMUSG00000022159	Rab2b	10.237	20.3713	0.502518	1.98998	NO	NO	NO	BBB	0	0	0	0
ENSMUSG00000022160	Mettl3	38.4897	37.9512	1.01419	0.986009	YES	NO	NO	ABB	1	0	0	0
ENSMUSG00000022174	Dad1	104.535	112.593	0.928435	1.07708	NO	YES	NO	BAB	0	3	0	3
ENSMUSG00000022175	Lrp10	19.1125	12.4535	1.53471	0.651588	YES	NO	YES	ABA	1	0	2	2
ENSMUSG00000022176	Rem2	2.69691	4.1597	0.648342	1.5424	YES	NO	YES	ABA	2	0	1	1
ENSMUSG00000022177	Haus4	21.6283	36.8964	0.58619	1.70593	YES	YES	NO	AAB	1	1	0	1
ENSMUSG00000022178	Ajuba	190.966	43.0037	4.4407	0.22519	NO	YES	NO	BAB	0	1	0	1
ENSMUSG00000022179	4931414P19Rik	10.1457	10.3007	0.984949	1.01528	NO	YES	NO	BAB	0	1	0	1
ENSMUSG00000022184	Fbxo4	2.69834	3.29138	0.819818	1.21978	NO	NO	YES	BBA	0	0	1	1
ENSMUSG00000022185	Acin1	218.311	235.8	0.925831	1.08011	NO	YES	NO	BAB	0	1	0	1
ENSMUSG00000022186	Oxct1	124.92	116.214	1.07492	0.930303	NO	YES	YES	BAA	0	1	1	2
ENSMUSG00000022191	Drosha	84.7317	89.8445	0.943093	1.06034	NO	YES	YES	BAA	0	1	1	2
ENSMUSG00000022193	Psmb5	263.968	276.331	0.955262	1.04683	NO	NO	NO	BBB	0	0	0	0
ENSMUSG00000022194	Pabpn1	350.335	355.87	0.984446	1.0158	NO	YES	NO	BAB	0	1	0	1
ENSMUSG00000022195	6030458C11Rik	20.7015	17.4283	1.18781	0.841886	YES	NO	YES	ABA	1	0	1	1
ENSMUSG00000022199	Slc22a17	33.9237	37.3611	0.907997	1.10133	NO	YES	NO	BAB	0	1	0	1
ENSMUSG00000022201	Zfr	86.592	88.8387	0.974711	1.02595	YES	YES	NO	AAB	1	2	0	2
ENSMUSG00000022203	Efs	59.0341	43.345	1.36196	0.734237	NO	NO	YES	BBA	0	0	1	1
ENSMUSG00000022205	Sub1	369.854	389.6	0.949318	1.05339	YES	YES	YES	AAA	1	1	1	2
ENSMUSG00000022210	Dhrs4	80.474	51.5866	1.55998	0.641035	NO	YES	YES	BAA	0	2	1	3
ENSMUSG00000022211	Lrrc16b	5.56962	5.73572	0.971041	1.02982	NO	NO	NO	BBB	0	0	0	0
ENSMUSG00000022214	Dcaf11	67.8421	51.6787	1.31277	0.761749	NO	NO	YES	BBA	0	0	1	1
ENSMUSG00000022216	Psme1	79.1514	66.3761	1.19247	0.838597	NO	NO	NO	BBB	0	0	0	0
ENSMUSG00000022217	Emc9	1.24094	1.79087	0.692926	1.44316	YES	NO	NO	ABB	1	0	0	0
ENSMUSG00000022218	Tgm1	22.6073	0.11071	204.202	0.00489711	NO	YES	NO	BAB	0	2	0	2
ENSMUSG00000022220	Adcy4	0.051778	7.24161	0.00715007	139.859	YES	YES	NO	AAB	1	3	0	3
ENSMUSG00000022221	Ripk3	3.85868	24.3799	0.158273	6.3182	NO	YES	NO	BAB	0	1	0	1
ENSMUSG00000022223	Sdr39u1	41.86	30.3233	1.38046	0.724398	YES	YES	YES	AAA	1	1	1	2
ENSMUSG00000022228	Zscan26	30.8446	30.198	1.02141	0.979038	NO	YES	NO	BAB	0	2	0	2
ENSMUSG00000022234	Cct5	533.879	586.381	0.910465	1.09834	YES	NO	NO	ABB	1	0	0	0
ENSMUSG00000022241	Tars	73.1673	68.8573	1.06259	0.941094	YES	NO	YES	ABA	2	0	2	2
ENSMUSG00000022244	Amacr	7.64092	8.39395	0.91029	1.09855	NO	NO	YES	BBA	0	0	3	3
ENSMUSG00000022246	Rai14	19.7773	125.192	0.157976	6.33006	YES	YES	YES	AAA	2	1	1	2
ENSMUSG00000022247	Brix1	67.2066	61.0772	1.10036	0.908797	NO	NO	NO	BBB	0	0	0	0
ENSMUSG00000022248	Rad1	35.608	36.8248	0.966957	1.03417	YES	NO	NO	ABB	1	0	0	0
ENSMUSG00000022253	Nadk2	25.8069	37.8059	0.682615	1.46495	YES	NO	YES	ABA	1	0	2	2
ENSMUSG00000022255	Mtdh	99.6745	109.869	0.907214	1.10228	NO	YES	YES	BAA	0	1	2	3
ENSMUSG00000022257	Laptm4b	46.7323	74.8134	0.624651	1.60089	NO	NO	NO	BBB	0	0	0	0
ENSMUSG00000022261	Sdc2	15.9871	38.2922	0.417502	2.3952	NO	YES	NO	BAB	0	1	0	1
ENSMUSG00000022265	Ank	3.20038	8.72251	0.36691	2.72546	NO	NO	YES	BBA	0	0	1	1
ENSMUSG00000022270	Fam134b	9.02288	2.70462	3.3361	0.299751	NO	NO	NO	BBB	0	0	0	0
ENSMUSG00000022280	Rnf19a	18.2551	23.8353	0.765884	1.30568	YES	YES	NO	AAB	1	1	0	1
ENSMUSG00000022292	Rrm2b	5.39387	4.16546	1.2949	0.772258	YES	NO	NO	ABB	1	0	0	0
ENSMUSG00000022295	Atp6v1c1	29.1036	27.0364	1.07646	0.928972	YES	NO	NO	ABB	1	0	0	0
ENSMUSG00000022299	Slc25a32	5.27597	5.29467	0.996467	1.00355	NO	NO	NO	BBB	0	0	0	0
ENSMUSG00000022300	Dcaf13	64.9581	54.0939	1.20084	0.83275	NO	NO	YES	BBA	0	0	1	1
ENSMUSG00000022305	Lrp12	46.3694	32.9104	1.40896	0.709745	NO	NO	YES	BBA	0	0	2	2
ENSMUSG00000022307	Oxr1	44.5129	37.4416	1.18886	0.84114	NO	NO	YES	BBA	0	0	1	1
ENSMUSG00000022309	Angpt1	1.27202	9.9369	0.12801	7.81188	YES	NO	YES	ABA	1	0	1	1
ENSMUSG00000022312	Eif3h	470.386	455.146	1.03348	0.967601	YES	YES	NO	AAB	1	3	0	3
ENSMUSG00000022313	Utp23	23.0885	17.7673	1.29949	0.769532	NO	NO	YES	BBA	0	0	1	1
ENSMUSG00000022314	Rad21	209.166	246.085	0.849976	1.1765	NO	NO	YES	BBA	0	0	3	3
ENSMUSG00000022321	Cdh10	0.479256	5.23652	0.0915217	10.9264	YES	YES	NO	AAB	1	1	0	1
ENSMUSG00000022322	Shcbp1	53.0545	63.9459	0.829677	1.20529	YES	YES	NO	AAB	1	1	0	1
ENSMUSG00000022323	Hrsp12	36.881	24.4756	1.50684	0.663638	NO	NO	NO	BBB	0	0	0	0
ENSMUSG00000022324	Matn2	0.734832	4.7298	0.155362	6.43657	NO	NO	NO	BBB	0	0	0	0
ENSMUSG00000022325	Pop1	21.1094	24.7268	0.853707	1.17136	NO	NO	NO	BBB	0	0	0	0
ENSMUSG00000022329	Stk3	28.6647	44.1791	0.648829	1.54124	NO	YES	YES	BAA	0	1	2	3
ENSMUSG00000022335	Zfat	4.60639	4.44442	1.03644	0.964838	YES	YES	YES	AAA	1	1	1	2
ENSMUSG00000022336	Eif3e	304.617	336.24	0.905951	1.10381	NO	NO	NO	BBB	0	0	0	0
ENSMUSG00000022337	Emc2	38.0723	50.5497	0.753166	1.32773	NO	NO	NO	BBB	0	0	0	0
ENSMUSG00000022338	Eny2	47.5162	57.1271	0.831762	1.20227	NO	YES	NO	BAB	0	1	0	1
ENSMUSG00000022339	Ebag9	28.547	23.0569	1.23811	0.807684	NO	NO	YES	BBA	0	0	1	1
ENSMUSG00000022350	E430025E21Rik	34.5461	43.045	0.802558	1.24602	NO	NO	NO	BBB	0	0	0	0
ENSMUSG00000022351	Sqle	91.7338	112.251	0.817221	1.22366	YES	YES	NO	AAB	1	3	0	3
ENSMUSG00000022354	Ndufb9	201.908	220.19	0.916969	1.09055	NO	YES	YES	BAA	0	2	1	3
ENSMUSG00000022360	Atad2	41.078	51.2674	0.801249	1.24805	NO	NO	YES	BBA	0	0	1	1
ENSMUSG00000022361	Zhx1	29.842	22.5424	1.32382	0.755392	NO	NO	NO	BBB	0	0	0	0
ENSMUSG00000022364	Tbc1d31	17.8134	16.3002	1.09283	0.915054	NO	YES	YES	BAA	0	1	1	2
ENSMUSG00000022369	Mtbp	24.4806	29.216	0.837916	1.19344	NO	NO	YES	BBA	0	0	2	2
ENSMUSG00000022370	Mrpl13	112.339	131.439	0.854685	1.17002	NO	NO	NO	BBB	0	0	0	0
ENSMUSG00000022385	Gtse1	28.6603	37.058	0.773389	1.29301	NO	YES	NO	BAB	0	1	0	1
ENSMUSG00000022387	Brd1	57.9114	43.7705	1.32307	0.755818	YES	YES	YES	AAA	1	2	1	3
ENSMUSG00000022389	Tef	19.5317	20.7254	0.942403	1.06112	YES	YES	YES	AAA	2	2	1	3
ENSMUSG00000022390	Zc3h7b	104.07	79.19	1.31419	0.760926	YES	YES	YES	AAA	1	1	2	3
ENSMUSG00000022391	Rangap1	141.179	139.254	1.01382	0.986364	NO	YES	YES	BAA	0	1	1	2
ENSMUSG00000022394	L3mbtl2	24.1474	21.1669	1.14081	0.87657	YES	NO	NO	ABB	1	0	0	0
ENSMUSG00000022400	Rbx1	111.088	112.245	0.98969	1.01042	NO	YES	NO	BAB	0	2	0	2
ENSMUSG00000022401	Xpnpep3	9.23927	9.31286	0.992098	1.00796	NO	NO	NO	BBB	0	0	0	0
ENSMUSG00000022403	St13	152.848	179.488	0.851582	1.17428	NO	NO	NO	BBB	0	0	0	0
ENSMUSG00000022420	Dnal4	68.9929	62.7173	1.10006	0.90904	NO	YES	NO	BAB	0	3	0	3
ENSMUSG00000022422	Dscc1	19.9368	22.8987	0.870651	1.14857	YES	YES	NO	AAB	1	1	0	1
ENSMUSG00000022425	Enpp2	0.796312	43.0694	0.018489	54.0861	YES	NO	YES	ABA	1	0	1	1
ENSMUSG00000022426	Josd1	39.3683	38.4671	1.02343	0.977107	NO	NO	NO	BBB	0	0	0	0
ENSMUSG00000022427	Tomm22	206.552	188.493	1.09581	0.912567	NO	NO	NO	BBB	0	0	0	0
ENSMUSG00000022428	Cby1	35.5927	54.1492	0.657307	1.52136	NO	NO	NO	BBB	0	0	0	0
ENSMUSG00000022434	Fam118a	10.6735	13.9311	0.766164	1.3052	NO	YES	YES	BAA	0	2	1	3
ENSMUSG00000022437	Samm50	103.811	90.115	1.15198	0.868068	NO	YES	NO	BAB	0	3	0	3
ENSMUSG00000022440	C1qtnf6	5.75072	30.9373	0.185883	5.37972	YES	YES	NO	AAB	1	1	0	1
ENSMUSG00000022442	Ttll1	16.2563	14.8793	1.09255	0.915291	YES	YES	YES	AAA	2	2	1	3
ENSMUSG00000022450	Ndufa6	161.139	157.493	1.02315	0.977378	NO	YES	NO	BAB	0	1	0	1
ENSMUSG00000022451	Twf1	52.1041	41.4763	1.25624	0.796028	YES	NO	NO	ABB	1	0	0	0
ENSMUSG00000022452	Smdt1	148.368	150.547	0.985531	1.01468	NO	YES	NO	BAB	0	1	0	1
ENSMUSG00000022454	Nell2	58.0695	5.04578	11.5085	0.086892	NO	NO	YES	BBA	0	0	2	2
ENSMUSG00000022456	Septin3	27.4006	67.4767	0.406075	2.4626	NO	NO	NO	BBB	0	0	0	0
ENSMUSG00000022462	Slc38a2	114.764	131.706	0.87136	1.14763	YES	YES	YES	AAA	2	2	1	3
ENSMUSG00000022466	Rpap3	30.0879	30.4921	0.986744	1.01343	YES	YES	NO	AAB	2	1	0	1
ENSMUSG00000022471	Xrcc6	50.4261	60.3444	0.835639	1.19669	YES	NO	NO	ABB	1	0	0	0
ENSMUSG00000022472	Desi1	35.4461	36.6912	0.966065	1.03513	YES	NO	NO	ABB	1	0	0	0
ENSMUSG00000022474	Pmm1	17.3486	15.3678	1.12889	0.885823	NO	NO	YES	BBA	0	0	1	1
ENSMUSG00000022476	Polr3h	17.3396	11.6331	1.49054	0.670897	NO	YES	NO	BAB	0	1	0	1
ENSMUSG00000022477	Aco2	112.472	123.214	0.912818	1.09551	NO	YES	NO	BAB	0	1	0	1
ENSMUSG00000022489	Pde1b	3.38193	3.97935	0.84987	1.17665	YES	YES	NO	AAB	3	2	0	2
ENSMUSG00000022490	Ppp1r1a	8.17007	4.05341	2.0156	0.496129	YES	NO	NO	ABB	3	0	0	0
ENSMUSG00000022498	Txndc11	21.1175	25.5413	0.826799	1.20948	YES	YES	NO	AAB	1	2	0	2
ENSMUSG00000022503	Nubp1	47.6545	51.4388	0.926432	1.07941	NO	NO	NO	BBB	0	0	0	0
ENSMUSG00000022507	1810013L24Rik	24.1482	22.4743	1.07448	0.930681	YES	NO	NO	ABB	2	0	0	0
ENSMUSG00000022512	Cldn1	25.2837	1.82867	13.8263	0.0723258	YES	YES	YES	AAA	1	1	1	2
ENSMUSG00000022514	Il1rap	4.40047	3.6727	1.19816	0.834616	NO	NO	YES	BBA	0	0	1	1
ENSMUSG00000022515	Anks3	13.9425	16.4105	0.849607	1.17701	NO	NO	NO	BBB	0	0	0	0
ENSMUSG00000022516	Nudt16l1	102.404	118.34	0.865341	1.15561	YES	YES	NO	AAB	1	1	0	1
ENSMUSG00000022517	Mgrn1	27.3224	47.6039	0.573953	1.7423	YES	YES	NO	AAB	1	2	0	2
ENSMUSG00000022519	Srl	30.6265	34.7423	0.881535	1.13438	YES	YES	YES	AAA	3	1	1	2
ENSMUSG00000022526	Zfp251	23.1924	31.6853	0.731963	1.36619	NO	YES	NO	BAB	0	1	0	1
ENSMUSG00000022529	Zfp263	23.0019	22.5014	1.02224	0.978241	NO	NO	NO	BBB	0	0	0	0
ENSMUSG00000022536	Glyr1	134.103	143.181	0.936601	1.06769	NO	NO	NO	BBB	0	0	0	0
ENSMUSG00000022538	Lsg1	48.1905	43.1578	1.11661	0.895568	NO	NO	YES	BBA	0	0	1	1
ENSMUSG00000022540	Rogdi	26.3762	36.182	0.728985	1.37177	YES	NO	NO	ABB	1	0	0	0
ENSMUSG00000022544	Fam86	12.9169	7.22779	1.78712	0.559559	NO	NO	NO	BBB	0	0	0	0
ENSMUSG00000022545	Ercc4	12.8028	7.82554	1.63603	0.611235	YES	YES	YES	AAA	2	1	1	2
ENSMUSG00000022546	Gpt	4.23972	3.64655	1.16267	0.860092	NO	NO	YES	BBA	0	0	2	2
ENSMUSG00000022550	Adck5	27.6477	26.3393	1.04968	0.952673	NO	YES	NO	BAB	0	2	0	2
ENSMUSG00000022551	Cyc1	220.141	241.658	0.910964	1.09774	NO	YES	NO	BAB	0	1	0	1
ENSMUSG00000022552	Sharpin	17.8133	18.2634	0.975353	1.02527	NO	YES	NO	BAB	0	1	0	1
ENSMUSG00000022553	Maf1	96.0205	88.9978	1.07891	0.926863	NO	YES	NO	BAB	0	1	0	1
ENSMUSG00000022554	Hgh1	16.1817	13.3466	1.21242	0.824796	NO	NO	NO	BBB	0	0	0	0
ENSMUSG00000022555	Dgat1	20.3862	25.3197	0.80515	1.242	NO	YES	NO	BAB	0	2	0	2
ENSMUSG00000022556	Hsf1	42.0118	40.6508	1.03348	0.967604	NO	NO	YES	BBA	0	0	1	1
ENSMUSG00000022558	Mroh1	10.2435	9.62362	1.06442	0.939483	YES	YES	NO	AAB	1	2	0	2
[truncated: 12,203 more rows]
