# Supplementary material for: AP-2α and AP-2β cooperatively function in the craniofacial surface ectoderm to regulate chromatin and gene expression dynamics during facial development
Source: eLife. 2022 Mar 25;11:e70511. doi: 10.7554/eLife.70511 (PMC9038197; doi:10.7554/eLife.70511)
Supplement: Supplementary file 2. — For each gene, the total number of elements (both promoter proximal and distal) and genomic location of each element, relative to the transcriptional start site, are indicated. [file elife-70511-supp2.xlsx]

## Sheet: 20201231-public-4.0.4-DMxfRM-mm
Assigned gene from GREAT 4.0.4	Number assigned peaks	mm10 peak 1	peak 2	peak 3	peak 4	peak 5	peak 6	peak 7	peak 8	peak 9	peak 10
Rhou	57	peak 1484 (-116437)	peak 1485 (-114708)	peak 1486 (-113140)	peak 1487 (-111480)	peak 1488 (-109652)	peak 1489 (-108069)	peak 1490 (-106368)	peak 1491 (-104613)	peak 1492 (-103017)	peak 1493 (-101169)	peak 1494 (-99315)	peak 1495 (-97855)	peak 1496 (-96131)	peak 1497 (-94443)	peak 1498 (-92844)	peak 1499 (-91179)	peak 1500 (-89720)	peak 1501 (-89229)	peak 1502 (-87550)	peak 1503 (-86166)	peak 1504 (-84129)	peak 1505 (-82701)	peak 1506 (-81068)	peak 1507 (-79305)	peak 1508 (-77700)	peak 1509 (-75721)	peak 1510 (-74215)	peak 1511 (-72662)	peak 1512 (-70802)	peak 1513 (-70163)	peak 1514 (-69000)	peak 1515 (-67585)	peak 1516 (-65626)	peak 1517 (-63918)	peak 1518 (-62578)	peak 1519 (-61664)	peak 1520 (-60645)	peak 1521 (-58829)	peak 1522 (-57372)	peak 1523 (-55703)	peak 1524 (-54936)	peak 1525 (-53985)	peak 1526 (-52152)	peak 1527 (-50258)	peak 1528 (-48766)	peak 1529 (-47026)	peak 1530 (-45306)	peak 1531 (-43773)
Gas8	56	peak 1484 (+18658)	peak 1485 (+20387)	peak 1486 (+21955)	peak 1487 (+23615)	peak 1488 (+25443)	peak 1489 (+27026)	peak 1490 (+28727)	peak 1491 (+30482)	peak 1492 (+32078)	peak 1493 (+33926)	peak 1494 (+35780)	peak 1495 (+37240)	peak 1496 (+38964)	peak 1497 (+40652)	peak 1498 (+42251)	peak 1499 (+43916)	peak 1500 (+45375)	peak 1501 (+45866)	peak 1502 (+47545)	peak 1503 (+48929)	peak 1504 (+50966)	peak 1505 (+52394)	peak 1506 (+54027)	peak 1507 (+55790)	peak 1508 (+57395)	peak 1509 (+59374)	peak 1510 (+60880)	peak 1511 (+62433)	peak 1512 (+64293)	peak 1513 (+64932)	peak 1514 (+66095)	peak 1515 (+67510)	peak 1516 (+69469)	peak 1517 (+71177)	peak 1518 (+72517)	peak 1519 (+73431)	peak 1520 (+74450)	peak 1521 (+76266)	peak 1522 (+77723)	peak 1523 (+79392)	peak 1524 (+80159)	peak 1525 (+81110)	peak 1526 (+82943)	peak 1527 (+84837)	peak 1528 (+86329)	peak 1529 (+88069)	peak 1530 (+89789)	peak 1531 (+91322)
Atg7	34	peak 1142 (-145726)	peak 1143 (-143388)	peak 1144 (-140660)	peak 1145 (-138293)	peak 1146 (-135970)	peak 1147 (-133561)	peak 1148 (-131516)	peak 1149 (-126259)	peak 1150 (-124231)	peak 1151 (-114570)	peak 1152 (-112029)	peak 1153 (-107177)	peak 1154 (-99804)	peak 1155 (-95003)	peak 1156 (-85146)	peak 1157 (-82900)	peak 1158 (-75567)	peak 1159 (-70163)	peak 1160 (-68097)	peak 1161 (-60754)	peak 1162 (-53394)	peak 1163 (-48575)	peak 1164 (-45881)	peak 1165 (-38564)	peak 1166 (-33723)	peak 1167 (-33324)	peak 1168 (-31495)	peak 1169 (-29067)	peak 1170 (-23885)	peak 1171 (-21467)	peak 1172 (-18777)	peak 1173 (-16355)	peak 1174 (-13851)	peak 1175 (+199382)
Hrh1	33	peak 1142 (+99450)	peak 1143 (+101788)	peak 1144 (+104516)	peak 1145 (+106883)	peak 1146 (+109206)	peak 1147 (+111615)	peak 1148 (+113660)	peak 1149 (+118917)	peak 1150 (+120945)	peak 1151 (+130606)	peak 1152 (+133147)	peak 1153 (+137999)	peak 1154 (+145372)	peak 1155 (+150173)	peak 1156 (+160030)	peak 1157 (+162276)	peak 1158 (+169609)	peak 1159 (+175013)	peak 1160 (+177079)	peak 1161 (+184422)	peak 1162 (+191782)	peak 1163 (+196601)	peak 1164 (+199295)	peak 1165 (+206612)	peak 1166 (+211453)	peak 1167 (+211852)	peak 1168 (+213681)	peak 1169 (+216109)	peak 1170 (+221291)	peak 1171 (+223709)	peak 1172 (+226399)	peak 1173 (+228821)	peak 1174 (+231325)
Asmt	19	peak 3041 (-790656)	peak 3042 (-749858)	peak 3043 (-749005)	peak 3044 (-681162)	peak 3045 (-677643)	peak 3046 (-675366)	peak 3047 (-671142)	peak 3048 (-669752)	peak 3049 (-668185)	peak 3050 (-667231)	peak 3051 (-663116)	peak 3052 (-658673)	peak 3053 (-658035)	peak 3054 (-657057)	peak 3055 (-656046)	peak 3056 (-655118)	peak 3057 (-653672)	peak 3058 (+85715)	peak 3059 (+208462)
Ezh2	19	peak 1062 (-177925)	peak 1061 (-177246)	peak 1060 (-173108)	peak 1059 (-168747)	peak 1058 (-163637)	peak 1057 (-162897)	peak 1056 (-158303)	peak 1055 (-153858)	peak 1054 (-149568)	peak 1053 (-145237)	peak 1052 (-90683)	peak 1051 (-86473)	peak 1050 (-82193)	peak 1049 (-78148)	peak 1048 (-77420)	peak 1047 (-73177)	peak 1046 (-69153)	peak 1045 (-64856)	peak 1044 (-60396)
Pdia4	19	peak 1062 (+40475)	peak 1061 (+41154)	peak 1060 (+45292)	peak 1059 (+49653)	peak 1058 (+54763)	peak 1057 (+55503)	peak 1056 (+60097)	peak 1055 (+64542)	peak 1054 (+68832)	peak 1053 (+73163)	peak 1052 (+127717)	peak 1051 (+131927)	peak 1050 (+136207)	peak 1049 (+140252)	peak 1048 (+140980)	peak 1047 (+145223)	peak 1046 (+149247)	peak 1045 (+153544)	peak 1044 (+158004)
Mid1	17	peak 3041 (+2366)	peak 3042 (+43164)	peak 3043 (+44017)	peak 3044 (+111860)	peak 3045 (+115379)	peak 3046 (+117656)	peak 3047 (+121880)	peak 3048 (+123270)	peak 3049 (+124837)	peak 3050 (+125791)	peak 3051 (+129906)	peak 3052 (+134349)	peak 3053 (+134987)	peak 3054 (+135965)	peak 3055 (+136976)	peak 3056 (+137904)	peak 3057 (+139350)
BC052040	12	peak 363 (-788272)	peak 364 (-456898)	peak 365 (-452332)	peak 366 (-432068)	peak 367 (-214061)	peak 368 (-206196)	peak 369 (-19403)	peak 370 (+294638)	peak 371 (+337670)	peak 372 (+380042)	peak 373 (+387695)	peak 374 (+420782)
Erdr1	12	peak 3060 (-18963)	peak 3061 (-16229)	peak 3062 (-15406)	peak 3063 (-13713)	peak 3064 (-12422)	peak 3065 (-8961)	peak 3066 (-7576)	peak 3067 (-407)	peak 3068 (+4488)	peak 3069 (+5455)	peak 3070 (+7414)	peak 3071 (+8833)
Sema3d	11	peak 827 (-333352)	peak 828 (-271236)	peak 829 (-175698)	peak 830 (+92069)	peak 831 (+142018)	peak 832 (+146608)	peak 833 (+151680)	peak 834 (+268218)	peak 835 (+281808)	peak 836 (+313039)	peak 837 (+742187)
Tfap2b	11	peak 11 (+25081)	peak 12 (+264596)	peak 13 (+268428)	peak 14 (+371698)	peak 15 (+374964)	peak 16 (+472613)	peak 17 (+490882)	peak 18 (+526663)	peak 19 (+599508)	peak 20 (+617522)	peak 21 (+963797)
Gm15319	10	peak 1385 (-187167)	peak 1384 (-61334)	peak 1383 (-47309)	peak 1382 (-26159)	peak 1381 (-25758)	peak 1380 (+34234)	peak 1379 (+66169)	peak 1378 (+79917)	peak 1377 (+240582)	peak 1376 (+578356)
Dph6	9	peak 369 (-907349)	peak 368 (-720556)	peak 367 (-712691)	peak 366 (-494684)	peak 365 (-474420)	peak 364 (-469854)	peak 363 (-138480)	peak 362 (+43190)	peak 361 (+64357)
Eif3h	9	peak 2522 (+353929)	peak 2521 (+521440)	peak 2520 (+648722)	peak 2519 (+709579)	peak 2518 (+725612)	peak 2517 (+794239)	peak 2516 (+797944)	peak 2515 (+826413)	peak 2514 (+901591)
Slc35b3	9	peak 2218 (-311727)	peak 2217 (-201347)	peak 2216 (-52785)	peak 2215 (-50982)	peak 2214 (-38350)	peak 2213 (+181602)	peak 2212 (+187720)	peak 2211 (+213083)	peak 2210 (+284764)
Trps1	9	peak 2522 (-622503)	peak 2521 (-454992)	peak 2520 (-327710)	peak 2519 (-266853)	peak 2518 (-250820)	peak 2517 (-182193)	peak 2516 (-178488)	peak 2515 (-150019)	peak 2514 (-74841)
3110018I06Rik	8	peak 2132 (-726434)	peak 2133 (-508416)	peak 2134 (-477193)	peak 2135 (-322675)	peak 2136 (-197256)	peak 2137 (+84152)	peak 2138 (+229702)	peak 2139 (+370348)
Adgrl2	8	peak 644 (+4644)	peak 643 (+349782)	peak 642 (+435707)	peak 641 (+463731)	peak 640 (+465167)	peak 639 (+481743)	peak 638 (+618853)	peak 637 (+627319)
Gas1	8	peak 2258 (-221948)	peak 2257 (-131212)	peak 2256 (+21221)	peak 2255 (+128566)	peak 2254 (+131766)	peak 2253 (+141172)	peak 2252 (+205693)	peak 2251 (+213603)
Sema3a	8	peak 830 (-923855)	peak 831 (-873906)	peak 832 (-869316)	peak 833 (-864244)	peak 834 (-747706)	peak 835 (-734116)	peak 836 (-702885)	peak 837 (-273737)
Camk1g	7	peak 226 (-936991)	peak 225 (-739273)	peak 224 (-737990)	peak 223 (-260716)	peak 222 (-187996)	peak 221 (-144312)	peak 220 (-30858)
Irx2	7	peak 2267 (-444401)	peak 2268 (-275686)	peak 2269 (-259673)	peak 2270 (-258924)	peak 2271 (+63372)	peak 2272 (+134774)	peak 2273 (+232239)
Pkhd1	7	peak 22 (+306983)	peak 21 (+445353)	peak 20 (+791628)	peak 19 (+809642)	peak 18 (+882487)	peak 17 (+918268)	peak 16 (+936537)
4921530L21Rik	6	peak 2423 (-386884)	peak 2424 (+18327)	peak 2425 (+132204)	peak 2426 (+148784)	peak 2427 (+197667)	peak 2428 (+245551)
4930467E23Rik	6	peak 1375 (-47084)	peak 1376 (+55278)	peak 1377 (+393052)	peak 1378 (+553717)	peak 1379 (+567465)	peak 1380 (+599400)
Efna5	6	peak 2782 (-176666)	peak 2781 (-166473)	peak 2780 (-58019)	peak 2779 (+48447)	peak 2778 (+674041)	peak 2777 (+785949)
Efnb2	6	peak 1364 (+74440)	peak 1363 (+131096)	peak 1362 (+244581)	peak 1361 (+258112)	peak 1360 (+557164)	peak 1359 (+828851)
Filip1l	6	peak 2662 (-20625)	peak 2663 (+30187)	peak 2664 (+30983)	peak 2665 (+38318)	peak 2666 (+40117)	peak 2667 (+200808)
Galnt18	6	peak 1300 (-75492)	peak 1299 (+8297)	peak 1298 (+19627)	peak 1297 (+179152)	peak 1296 (+623009)	peak 1295 (+623345)
Gm10717	6	peak 1555 (-4949)	peak 1556 (-3366)	peak 1557 (-1387)	peak 1558 (+350)	peak 1559 (+1103)	peak 1560 (+3067)
Gm10721	6	peak 1547 (-7934)	peak 1548 (-6240)	peak 1549 (-4550)	peak 1550 (-2907)	peak 1551 (-1144)	peak 1552 (+461)
Hmga2	6	peak 1847 (-311508)	peak 1846 (-283948)	peak 1845 (-256566)	peak 1844 (-244229)	peak 1843 (-39469)	peak 1842 (+47591)
Iqsec1	6	peak 1111 (-294994)	peak 1110 (-235610)	peak 1109 (-210863)	peak 1108 (-201496)	peak 1107 (-165636)	peak 1106 (-90418)
Meis2	6	peak 375 (-583952)	peak 374 (+62549)	peak 373 (+95636)	peak 372 (+103289)	peak 371 (+145661)	peak 370 (+188693)
Nup210	6	peak 1111 (+11712)	peak 1110 (+71096)	peak 1109 (+95843)	peak 1108 (+105210)	peak 1107 (+141070)	peak 1106 (+216288)
Pcdh18	6	peak 476 (-675543)	peak 475 (-50579)	peak 474 (+197246)	peak 473 (+669511)	peak 472 (+718486)	peak 471 (+852474)
Pde4d	6	peak 2312 (+164509)	peak 2313 (+202051)	peak 2314 (+202742)	peak 2315 (+624518)	peak 2316 (+645461)	peak 2317 (+697342)
Robo2	6	peak 2688 (-584021)	peak 2687 (-395950)	peak 2686 (-212699)	peak 2685 (-159685)	peak 2684 (-129360)	peak 2683 (+116456)
Slc7a11	6	peak 480 (-764642)	peak 479 (-401960)	peak 478 (-279265)	peak 477 (-234799)	peak 476 (+10752)	peak 475 (+635716)
Thap1	6	peak 1390 (+650324)	peak 1391 (+650844)	peak 1392 (+657060)	peak 1393 (+666268)	peak 1394 (+668577)	peak 1395 (+729260)
Tnfrsf19	6	peak 2391 (-15365)	peak 2390 (+131764)	peak 2389 (+133295)	peak 2388 (+145373)	peak 2387 (+156075)	peak 2386 (+197240)
Zcchc6	6	peak 2256 (-332573)	peak 2255 (-225228)	peak 2254 (-222028)	peak 2253 (-212622)	peak 2252 (-148101)	peak 2251 (-140191)
Zfp36l1	6	peak 2105 (-53951)	peak 2104 (+21606)	peak 2103 (+110895)	peak 2102 (+128695)	peak 2101 (+136894)	peak 2100 (+183011)
Zfp703	6	peak 1390 (-168889)	peak 1391 (-168369)	peak 1392 (-162153)	peak 1393 (-152945)	peak 1394 (-150636)	peak 1395 (-89953)
Ccl28	5	peak 2325 (-27079)	peak 2326 (-25463)	peak 2327 (-24623)	peak 2328 (-22368)	peak 2329 (-21741)
Chst2	5	peak 1682 (+202723)	peak 1681 (+254759)	peak 1680 (+416658)	peak 1679 (+510195)	peak 1678 (+595633)
Cmss1	5	peak 2667 (+52924)	peak 2666 (+213615)	peak 2665 (+215414)	peak 2664 (+222749)	peak 2663 (+223545)
Defb33	5	peak 1381 (-503701)	peak 1382 (-503300)	peak 1383 (-482150)	peak 1384 (-468125)	peak 1385 (-342292)
Eapp	5	peak 2082 (-42577)	peak 2081 (-33912)	peak 2080 (-23231)	peak 2079 (-18459)	peak 2078 (-14589)
Eif4g2	5	peak 1299 (-688650)	peak 1298 (-677320)	peak 1297 (-517795)	peak 1296 (-73938)	peak 1295 (-73602)
Fcgr3	5	peak 181 (-20821)	peak 180 (-20135)	peak 179 (-13189)	peak 178 (-12521)	peak 177 (-4897)
Fgf14	5	peak 2461 (-124769)	peak 2460 (+395007)	peak 2459 (+652848)	peak 2458 (+674568)	peak 2457 (+682590)
Fry	5	peak 989 (-100461)	peak 990 (+35455)	peak 991 (+91281)	peak 992 (+162347)	peak 993 (+198582)
Gata6	5	peak 2837 (-63854)	peak 2838 (+236210)	peak 2839 (+509826)	peak 2840 (+544878)	peak 2841 (+568816)
Gm11492	5	peak 1962 (-139872)	peak 1963 (-123346)	peak 1964 (-117943)	peak 1965 (-104303)	peak 1966 (-95192)
Haao	5	peak 2812 (-282621)	peak 2811 (-118204)	peak 2810 (-109325)	peak 2809 (-55542)	peak 2808 (+54183)
Irx4	5	peak 2271 (-568305)	peak 2272 (-496903)	peak 2273 (-399438)	peak 2274 (-2349)	peak 2275 (+2746)
Klhl1	5	peak 2428 (+392285)	peak 2427 (+440169)	peak 2426 (+489052)	peak 2425 (+505632)	peak 2424 (+619509)
Lsamp	5	peak 2643 (-951273)	peak 2644 (-666896)	peak 2645 (-656727)	peak 2646 (-641291)	peak 2647 (+106609)
Mipep	5	peak 2386 (+64656)	peak 2387 (+105821)	peak 2388 (+116523)	peak 2389 (+128601)	peak 2390 (+130132)
Msrb3	5	peak 1847 (+111124)	peak 1846 (+138684)	peak 1845 (+166066)	peak 1844 (+178403)	peak 1843 (+383163)
Nckap5	5	peak 120 (-171296)	peak 119 (+10701)	peak 118 (+221728)	peak 117 (+234382)	peak 116 (+398561)
Oxr1	5	peak 2502 (-156291)	peak 2503 (+3036)	peak 2504 (+238483)	peak 2505 (+241934)	peak 2506 (+394875)
Pdgfc	5	peak 524 (-43215)	peak 525 (+144167)	peak 526 (+499648)	peak 527 (+666007)	peak 528 (+780167)
Plxdc2	5	peak 246 (-780763)	peak 247 (-720834)	peak 248 (+41420)	peak 249 (+42836)	peak 250 (+193207)
Plxna2	5	peak 223 (-988811)	peak 224 (-511537)	peak 225 (-510254)	peak 226 (-312536)	peak 227 (+42385)
Ptprd	5	peak 705 (+227227)	peak 704 (+360771)	peak 703 (+457893)	peak 702 (+724572)	peak 701 (+736062)
Rad51b	5	peak 2100 (+632651)	peak 2101 (+678768)	peak 2102 (+686967)	peak 2103 (+704767)	peak 2104 (+794056)
Rasgef1b	5	peak 927 (-374177)	peak 926 (-360792)	peak 925 (-219871)	peak 924 (-124313)	peak 923 (+179821)
Rreb1	5	peak 2204 (-312142)	peak 2205 (-297178)	peak 2206 (-245237)	peak 2207 (-183467)	peak 2208 (+97961)
Slc9a9	5	peak 1678 (+141180)	peak 1679 (+226618)	peak 1680 (+320155)	peak 1681 (+482054)	peak 1682 (+534090)
Snx6	5	peak 2082 (+57245)	peak 2081 (+65910)	peak 2080 (+76591)	peak 2079 (+81363)	peak 2078 (+85233)
Tex14	5	peak 1962 (+21716)	peak 1963 (+38242)	peak 1964 (+43645)	peak 1965 (+57285)	peak 1966 (+66396)
Tmem267	5	peak 2325 (+107880)	peak 2326 (+109496)	peak 2327 (+110336)	peak 2328 (+112591)	peak 2329 (+113218)
Trp63	5	peak 2620 (-276063)	peak 2621 (+91458)	peak 2622 (+96365)	peak 2623 (+131069)	peak 2624 (+149972)
Ttll7	5	peak 632 (+345588)	peak 633 (+424548)	peak 634 (+828065)	peak 635 (+945266)	peak 636 (+980090)
Zfp36l2	5	peak 2813 (-125224)	peak 2812 (+58536)	peak 2811 (+222953)	peak 2810 (+231832)	peak 2809 (+285615)
Abra	4	peak 2506 (+27363)	peak 2505 (+180304)	peak 2504 (+183755)	peak 2503 (+419202)
Acvr2a	4	peak 293 (-887380)	peak 294 (-865425)	peak 295 (-487057)	peak 296 (-211072)
Adamtsl1	4	peak 713 (-235200)	peak 714 (-93829)	peak 715 (+183229)	peak 716 (+450295)
Alcam	4	peak 2658 (-319891)	peak 2657 (-41877)	peak 2656 (-41523)	peak 2655 (+396740)
Arl6	4	peak 2672 (-756160)	peak 2671 (-627722)	peak 2670 (-429803)	peak 2669 (+72667)
Cbr4	4	peak 1417 (-192048)	peak 1418 (-83358)	peak 1419 (-70626)	peak 1420 (+378924)
Cers6	4	peak 321 (-55570)	peak 322 (+113912)	peak 323 (+116835)	peak 324 (+118593)
Cryaa	4	peak 2755 (+8517)	peak 2756 (+35747)	peak 2757 (+68978)	peak 2758 (+70404)
Cyp26a1	4	peak 2967 (-10768)	peak 2968 (+70540)	peak 2969 (+71342)	peak 2970 (+317978)
D630036H23Rik	4	peak 2057 (-223217)	peak 2056 (-53192)	peak 2055 (-44521)	peak 2054 (-3365)
Fam196b	4	peak 1903 (+8693)	peak 1904 (+20682)	peak 1905 (+25014)	peak 1906 (+27190)
Fam198b	4	peak 520 (-5185)	peak 521 (+254248)	peak 522 (+378694)	peak 523 (+629817)
Fgfr2	4	peak 1326 (-74551)	peak 1325 (-61899)	peak 1324 (+279301)	peak 1323 (+291182)
Gm3045	4	peak 2244 (-111178)	peak 2245 (-100514)	peak 2246 (-82086)	peak 2247 (-75793)
Khdc1b	4	peak 23 (+44731)	peak 24 (+77590)	peak 25 (+152282)	peak 26 (+509655)
Mbnl1	4	peak 501 (-191710)	peak 502 (-1041)	peak 503 (+81551)	peak 504 (+116589)
Mmadhc	4	peak 304 (-722329)	peak 303 (-692556)	peak 302 (-519146)	peak 301 (-390657)
Myl10	4	peak 966 (-84093)	peak 967 (-35920)	peak 968 (+9192)	peak 969 (+21500)
Pcdh9	4	peak 2422 (-631589)	peak 2421 (-199945)	peak 2420 (+565390)	peak 2419 (+647953)
Pdcd4	4	peak 2993 (-85967)	peak 2994 (-85355)	peak 2995 (-32315)	peak 2996 (+2654)
Sh3rf3	4	peak 1768 (+58054)	peak 1769 (+136502)	peak 1770 (+381534)	peak 1771 (+395767)
Slc4a3	4	peak 76 (+42889)	peak 77 (+67041)	peak 78 (+187723)	peak 79 (+524752)
Zar1l	4	peak 993 (+59815)	peak 992 (+96050)	peak 991 (+167116)	peak 990 (+222942)
1700025G04Rik	3	peak 151 (-79676)	peak 150 (+50462)	peak 149 (+247410)
5530401A14Rik	3	peak 1957 (-626900)	peak 1958 (-363273)	peak 1959 (-22095)
5730480H06Rik	3	peak 873 (+894743)	peak 874 (+908314)	peak 875 (+947885)
Alk	3	peak 2796 (+380208)	peak 2795 (+687030)	peak 2794 (+725396)
Arhgef16	3	peak 816 (-109200)	peak 815 (+75703)	peak 814 (+82232)
Asap1	3	peak 2538 (-230323)	peak 2537 (+37935)	peak 2536 (+207687)
Atxn10	3	peak 2559 (+24088)	peak 2560 (+45798)	peak 2561 (+73456)
Bach1	3	peak 2696 (+217597)	peak 2697 (+218412)	peak 2698 (+237360)
Cacng3	3	peak 1316 (-111211)	peak 1317 (-64636)	peak 1318 (+94223)
Camk2d	3	peak 596 (-62568)	peak 597 (+34458)	peak 598 (+478967)
Ccdc6	3	peak 1780 (-186389)	peak 1781 (-170438)	peak 1782 (-168506)
Cdon	3	peak 1600 (-116151)	peak 1601 (-94536)	peak 1602 (-81780)
Clip4	3	peak 2794 (+96366)	peak 2795 (+134732)	peak 2796 (+441554)
Cpxm2	3	peak 1335 (-79723)	peak 1334 (-34821)	peak 1333 (+76285)
Crb1	3	peak 138 (+195472)	peak 137 (+338195)	peak 136 (+338780)
Csmd3	3	peak 2513 (-614185)	peak 2512 (+602859)	peak 2511 (+937027)
Dab1	3	peak 742 (-591727)	peak 743 (-158414)	peak 744 (+99050)
Efcab1	3	peak 2606 (+24265)	peak 2607 (+30044)	peak 2608 (+37075)
Enox1	3	peak 2404 (+52218)	peak 2405 (+53279)	peak 2406 (+82208)
Fat4	3	peak 464 (-301183)	peak 465 (-35990)	peak 466 (+173866)
Frem2	3	peak 491 (-888)	peak 490 (+33960)	peak 489 (+57927)
Gadl1	3	peak 1713 (-133569)	peak 1714 (+97040)	peak 1715 (+260729)
Gata3	3	peak 239 (+526213)	peak 238 (+760884)	peak 237 (+904304)
Gjb6	3	peak 2381 (-243439)	peak 2380 (-113968)	peak 2379 (+3058)
Gm10234	3	peak 1119 (-25114)	peak 1120 (+371878)	peak 1121 (+391756)
Gm10801	3	peak 352 (+367)	peak 353 (+1655)	peak 354 (+2828)
Gm5148	3	peak 463 (-423081)	peak 462 (+56427)	peak 461 (+70171)
Gtdc1	3	peak 289 (-241779)	peak 288 (-240846)	peak 287 (+228590)
Hist1h2ad	3	peak 2187 (-3495)	peak 2188 (-2806)	peak 2189 (+274)
Hist1h3d	3	peak 2187 (-4877)	peak 2188 (-4188)	peak 2189 (-1108)
Hist1h3h	3	peak 2176 (-1649)	peak 2177 (-1019)	peak 2178 (+3948)
Kcnh7	3	peak 316 (-872968)	peak 315 (-446760)	peak 314 (+483987)
Kctd1	3	peak 2846 (-111371)	peak 2845 (+48425)	peak 2844 (+218530)
Lca5	3	peak 1671 (-41271)	peak 1670 (+51280)	peak 1669 (+89707)
Lef1	3	peak 604 (-185338)	peak 605 (+46098)	peak 606 (+103874)
Lmna	3	peak 540 (-113)	peak 539 (+14733)	peak 538 (+30122)
Lrrtm1	3	peak 1093 (-123999)	peak 1094 (-108659)	peak 1095 (+3681)
Maml3	3	peak 485 (+58637)	peak 484 (+60153)	peak 483 (+203785)
Mex3b	3	peak 1270 (-95996)	peak 1271 (+356927)	peak 1272 (+521049)
Mpz	3	peak 182 (+37732)	peak 183 (+42577)	peak 184 (+43350)
Naaladl2	3	peak 450 (-753497)	peak 449 (+4918)	peak 448 (+341587)
Nav2	3	peak 1237 (+67275)	peak 1238 (+303945)	peak 1239 (+363869)
Nectin1	3	peak 1608 (-425167)	peak 1609 (-424606)	peak 1610 (+22028)
Nfe2l3	3	peak 1068 (-449527)	peak 1069 (-440727)	peak 1070 (-355670)
Nostrin	3	peak 322 (-160302)	peak 323 (-157379)	peak 324 (-155621)
Nup35	3	peak 338 (-3992)	peak 339 (+542515)	peak 340 (+850212)
Opcml	3	peak 1591 (+27564)	peak 1592 (+57358)	peak 1593 (+484872)
Otx1	3	peak 1891 (-193533)	peak 1890 (-518)	peak 1889 (+355344)
Parp11	3	peak 1187 (-182702)	peak 1188 (-77786)	peak 1189 (-6835)
Plb1	3	peak 855 (+47262)	peak 856 (+148455)	peak 857 (+172878)
Plxnc1	3	peak 1815 (-163018)	peak 1814 (-153681)	peak 1813 (+4550)
Ppp3ca	3	peak 615 (+239076)	peak 616 (+503815)	peak 617 (+622727)
Pten	3	peak 2960 (+128531)	peak 2961 (+131181)	peak 2962 (+282231)
Qk	3	peak 2726 (+184768)	peak 2725 (+191096)	peak 2724 (+540290)
Rgs6	3	peak 2106 (+68942)	peak 2107 (+368677)	peak 2108 (+798483)
Rnf152	3	peak 103 (+99464)	peak 102 (+193570)	peak 101 (+239889)
Rnf219	3	peak 2436 (-193223)	peak 2435 (-171960)	peak 2434 (-126809)
Rpusd4	3	peak 1600 (+37542)	peak 1601 (+59157)	peak 1602 (+71913)
Stau2	3	peak 8 (+305512)	peak 7 (+306564)	peak 6 (+324296)
Tgfbr2	3	peak 1716 (-913327)	peak 1715 (+5081)	peak 1714 (+168770)
Thbs1	3	peak 377 (-634103)	peak 378 (-632229)	peak 379 (-37679)
Thsd7a	3	peak 1011 (+55427)	peak 1010 (+167922)	peak 1009 (+760472)
Tns3	3	peak 1872 (-11694)	peak 1871 (+80744)	peak 1870 (+123005)
Ube2v2	3	peak 2608 (+650812)	peak 2607 (+657843)	peak 2606 (+663622)
Vav3	3	peak 578 (-83560)	peak 579 (-29111)	peak 580 (+238541)
Whrn	3	peak 693 (+58616)	peak 692 (+74749)	peak 691 (+75327)
Zdhhc21	3	peak 710 (+236210)	peak 709 (+316439)	peak 708 (+338914)
1700001O22Rik	2	peak 275 (+114297)	peak 274 (+164812)
3300002I08Rik	2	peak 412 (-77301)	peak 411 (+4871)
9130409J20Rik	2	peak 1935 (-34303)	peak 1936 (+10175)
Actn4	2	peak 1227 (-10221)	peak 1226 (+52777)
Agap1	2	peak 93 (-209593)	peak 94 (+29249)
Akap9	2	peak 822 (+125035)	peak 823 (+125785)
Anks1b	2	peak 1805 (-668488)	peak 1806 (-270197)
Aplp2	2	peak 1596 (-54403)	peak 1595 (+52007)
Arg1	2	peak 1751 (+260)	peak 1750 (+22909)
Arhgap18	2	peak 1753 (-381201)	peak 1754 (-5086)
Arhgap21	2	peak 257 (+67700)	peak 256 (+214147)
Arhgap25	2	peak 1101 (+53583)	peak 1100 (+54241)
Arhgef3	2	peak 2358 (-92785)	peak 2359 (+34225)
Arpp21	2	peak 1709 (+12850)	peak 1708 (+87210)
Babam2	2	peak 853 (+100729)	peak 854 (+423223)
Banp	2	peak 1479 (+20614)	peak 1480 (+113977)
Bcl2l11	2	peak 391 (+258633)	peak 392 (+439926)
Blm	2	peak 1266 (-42790)	peak 1265 (+92308)
Bmp10	2	peak 1100 (+50000)	peak 1101 (+50658)
Bmpr1b	2	peak 623 (-270988)	peak 622 (-56148)
Btrc	2	peak 2980 (-45918)	peak 2981 (-38985)
C2cd4b	2	peak 1647 (-186133)	peak 1648 (-151569)
C8b	2	peak 744 (-299677)	peak 745 (+64273)
Cacna1e	2	peak 157 (-300074)	peak 156 (+129921)
Calm5	2	peak 2156 (+23113)	peak 2157 (+23656)
Ccdc149	2	peak 879 (+22285)	peak 878 (+67005)
Ccdc167	2	peak 2752 (-136250)	peak 2751 (-135864)
Ccdc182	2	peak 1970 (-17065)	peak 1971 (+290747)
Ccdc185	2	peak 201 (+46910)	peak 200 (+62613)
Cdh3	2	peak 1463 (+17849)	peak 1464 (+53246)
Celf2	2	peak 235 (-29217)	peak 234 (+10520)
Chl1	2	peak 1134 (-877501)	peak 1135 (+138105)
Cited4	2	peak 763 (-67473)	peak 764 (+45889)
Clint1	2	peak 1913 (-962232)	peak 1914 (-33853)
Clnk	2	peak 866 (-475903)	peak 865 (-166898)
Cnot2	2	peak 1837 (-168081)	peak 1836 (-162394)
Cnr1	2	peak 671 (-335313)	peak 672 (-190756)
Ctnnd2	2	peak 2492 (-33255)	peak 2493 (+739596)
Ctu2	2	peak 1481 (+50206)	peak 1482 (+61094)
Dap	2	peak 2493 (-312125)	peak 2494 (+141258)
Dct	2	peak 2448 (+267150)	peak 2447 (+625970)
Dmbt1	2	peak 1329 (-70458)	peak 1330 (-49495)
Dpp6	2	peak 849 (-286556)	peak 850 (+192945)
Dsc3	2	peak 2851 (+113110)	peak 2850 (+113973)
Egr3	2	peak 2398 (-91467)	peak 2399 (-9309)
Elmo1	2	peak 2173 (-88443)	peak 2174 (+34373)
Eogt	2	peak 1124 (+593)	peak 1123 (+30725)
Etl4	2	peak 256 (+463661)	peak 257 (+610108)
Fam49b	2	peak 2537 (-284536)	peak 2536 (-114784)
Fbxl2	2	peak 1711 (+61045)	peak 1710 (+79333)
Fbxo16	2	peak 2392 (+77361)	peak 2393 (+85304)
Fhdc1	2	peak 532 (+135554)	peak 531 (+146761)
Frmd4b	2	peak 1126 (-23133)	peak 1125 (+79469)
Fscb	2	peak 2088 (+176460)	peak 2087 (+714938)
Gadd45g	2	peak 2236 (+59661)	peak 2237 (+174969)
Gm13276	2	peak 725 (-2929)	peak 726 (-81)
Gm16223	2	peak 867 (+83277)	peak 868 (+610646)
Gm21973	2	peak 2474 (-135499)	peak 2475 (-134669)
Gm9747	2	peak 84 (-661468)	peak 85 (-627282)
Gpr37	2	peak 1023 (-9438)	peak 1022 (+144009)
Gsg1	2	peak 1195 (-15513)	peak 1194 (-3896)
Hadh	2	peak 606 (+57756)	peak 605 (+115532)
Asic2	4	peak 1959 (-685263)	peak 1958 (-344085)	peak 1957 (-80458)	peak 1956 (+176060)
Atp23	4	peak 1857 (+93122)	peak 1856 (+108058)	peak 1855 (+220179)	peak 1854 (+531510)
Camk1d	4	peak 233 (+207045)	peak 232 (+335265)	peak 231 (+395557)	peak 230 (+474886)
Car12	4	peak 1643 (-15634)	peak 1644 (+9095)	peak 1645 (+17498)	peak 1646 (+30692)
Casp12	4	peak 1565 (+283358)	peak 1566 (+425929)	peak 1567 (+540197)	peak 1568 (+596335)
Ccdc3	4	peak 230 (+101853)	peak 231 (+181182)	peak 232 (+241474)	peak 233 (+369694)
Cd180	4	peak 2303 (-171796)	peak 2304 (+17061)	peak 2305 (+205296)	peak 2306 (+623512)
Cfap126	4	peak 178 (-49737)	peak 179 (-49069)	peak 180 (-42123)	peak 181 (-41437)
Chst11	4	peak 1797 (-1552)	peak 1798 (+7709)	peak 1799 (+26645)	peak 1800 (+112788)
Chst15	4	peak 1337 (-133396)	peak 1336 (-68209)	peak 1335 (+82252)	peak 1334 (+127154)
Col12a1	4	peak 1666 (+99480)	peak 1665 (+419239)	peak 1664 (+552702)	peak 1663 (+554442)
Col19a1	4	peak 31 (-26384)	peak 30 (+24972)	peak 29 (+75722)	peak 28 (+297200)
Ctif	4	peak 2915 (+150093)	peak 2914 (+203508)	peak 2913 (+299430)	peak 2912 (+301286)
Ctso	4	peak 525 (-752018)	peak 526 (-396537)	peak 527 (-230178)	peak 528 (-116018)
Cxcl14	4	peak 2247 (-54250)	peak 2246 (-47957)	peak 2245 (-29529)	peak 2244 (-18865)
Dcdc2c	4	peak 2043 (+146694)	peak 2042 (+162416)	peak 2041 (+319441)	peak 2040 (+601015)
Dnmt3a	4	peak 2023 (-128576)	peak 2024 (-121876)	peak 2025 (-87710)	peak 2026 (-25760)
Dock2	4	peak 1906 (+441880)	peak 1905 (+444056)	peak 1904 (+448388)	peak 1903 (+460377)
Dtnb	4	peak 2023 (+106063)	peak 2024 (+112763)	peak 2025 (+146929)	peak 2026 (+208879)
Edem3	4	peak 147 (-104493)	peak 148 (-97967)	peak 149 (+87341)	peak 150 (+284289)
Eef1e1	4	peak 2213 (-120215)	peak 2212 (-114097)	peak 2211 (-88734)	peak 2210 (-17053)
Epb41l4a	4	peak 2867 (-56513)	peak 2866 (+111772)	peak 2865 (+130387)	peak 2864 (+141379)
Etaa1	4	peak 1882 (-87891)	peak 1881 (+196677)	peak 1880 (+264383)	peak 1879 (+267970)
Fgd5	4	peak 1112 (+10942)	peak 1113 (+12731)	peak 1114 (+90965)	peak 1115 (+98541)
Foxk1	4	peak 977 (-785530)	peak 978 (-783708)	peak 979 (-577311)	peak 980 (-251506)
Foxp1	4	peak 1130 (+299138)	peak 1129 (+350100)	peak 1128 (+802014)	peak 1127 (+802892)
Fzd8	4	peak 2833 (-458718)	peak 2834 (-375287)	peak 2835 (-113121)	peak 2836 (+4207)
Gad2	4	peak 258 (-34269)	peak 259 (-33329)	peak 260 (-32935)	peak 261 (-32455)
Gls	4	peak 55 (-60566)	peak 54 (-9355)	peak 53 (+63104)	peak 52 (+71618)
Gm10110	4	peak 2418 (-749497)	peak 2417 (-324709)	peak 2416 (+331532)	peak 2415 (+862897)
Gm17535	4	peak 1559 (-8079)	peak 1560 (-6115)	peak 1561 (-4045)	peak 1562 (-1957)
Gm3448	4	peak 2739 (-45857)	peak 2738 (-31435)	peak 2737 (-14490)	peak 2736 (-137)
Gm35911	4	peak 924 (-529076)	peak 925 (-433518)	peak 926 (-292597)	peak 927 (-279212)
Gm5294	4	peak 971 (+55308)	peak 972 (+63719)	peak 973 (+110105)	peak 974 (+114652)
Gm765	4	peak 1130 (-793453)	peak 1129 (-742491)	peak 1128 (-290577)	peak 1127 (-289699)
Gosr2	4	peak 1994 (-24346)	peak 1993 (-14282)	peak 1992 (-7132)	peak 1991 (+39431)
Gpc6	4	peak 2445 (+61902)	peak 2446 (+102806)	peak 2447 (+500745)	peak 2448 (+859565)
Grik1	4	peak 2699 (-135520)	peak 2698 (+353953)	peak 2697 (+372901)	peak 2696 (+373716)
H2al2a	4	peak 254 (+65984)	peak 253 (+79432)	peak 252 (+128682)	peak 251 (+237738)
Irx1	4	peak 2270 (-406173)	peak 2269 (-405424)	peak 2268 (-389411)	peak 2267 (-220696)
Irx3	4	peak 1450 (-478644)	peak 1449 (+177405)	peak 1448 (+306740)	peak 1447 (+434444)
Itgbl1	4	peak 2457 (+334566)	peak 2458 (+342588)	peak 2459 (+364308)	peak 2460 (+622149)
Jarid2	4	peak 2228 (-477713)	peak 2229 (-216502)	peak 2230 (-195682)	peak 2231 (+138511)
Kank1	4	peak 2951 (-171910)	peak 2952 (-136900)	peak 2953 (+36422)	peak 2954 (+242421)
Kcnip1	4	peak 1901 (-29021)	peak 1900 (+24387)	peak 1899 (+230071)	peak 1898 (+235579)
Kcnq5	4	peak 26 (+68731)	peak 25 (+426104)	peak 24 (+500796)	peak 23 (+533655)
Kit	4	peak 900 (-308518)	peak 901 (-301335)	peak 902 (-185251)	peak 903 (+235991)
Lmx1b	4	peak 281 (-96043)	peak 280 (+23779)	peak 279 (+36068)	peak 278 (+45173)
Lrig3	4	peak 1854 (+403585)	peak 1855 (+714916)	peak 1856 (+827037)	peak 1857 (+841973)
Lrmda	4	peak 2349 (+165091)	peak 2350 (+691009)	peak 2351 (+739974)	peak 2352 (+789860)
Ly86	4	peak 2204 (+168965)	peak 2205 (+183929)	peak 2206 (+235870)	peak 2207 (+297640)
Lypd1	4	peak 119 (-907717)	peak 118 (-696690)	peak 117 (-684036)	peak 116 (-519857)
Mast4	4	peak 2307 (-80877)	peak 2306 (+17390)	peak 2305 (+435606)	peak 2304 (+623841)
Mgst2	4	peak 482 (-8555)	peak 483 (+240112)	peak 484 (+383744)	peak 485 (+385260)
Myo1b	4	peak 51 (-81595)	peak 50 (+385851)	peak 49 (+406677)	peak 48 (+407461)
Myo3a	4	peak 258 (+360433)	peak 259 (+361373)	peak 260 (+361767)	peak 261 (+362247)
Nebl	4	peak 254 (-199931)	peak 253 (-186483)	peak 252 (-137233)	peak 251 (-28177)
Nfib	4	peak 710 (-118155)	peak 709 (-37926)	peak 708 (-15451)	peak 707 (+456257)
Noct	4	peak 477 (-546037)	peak 478 (-501571)	peak 479 (-378876)	peak 480 (-16194)
Nova1	4	peak 2071 (-810705)	peak 2070 (-754737)	peak 2069 (-321938)	peak 2068 (+183307)
Nr2c2	4	peak 1112 (-102613)	peak 1113 (-100824)	peak 1114 (-22590)	peak 1115 (-15014)
P3h2	4	peak 2624 (+272047)	peak 2623 (+290950)	peak 2622 (+325654)	peak 2621 (+330561)
Pdgfa	4	peak 974 (+60305)	peak 973 (+64852)	peak 972 (+111238)	peak 971 (+119649)
Pdgfd	4	peak 1565 (-539824)	peak 1566 (-397253)	peak 1567 (-282985)	peak 1568 (-226847)
Piezo2	4	peak 2902 (-106782)	peak 2901 (-16972)	peak 2900 (+253502)	peak 2899 (+392311)
Prlr	4	peak 2472 (-163415)	peak 2473 (-143581)	peak 2474 (+12226)	peak 2475 (+13056)
Ptpn13	4	peak 930 (-115390)	peak 931 (-4596)	peak 932 (+112348)	peak 933 (+171318)
Rbbp8	4	peak 2838 (-368629)	peak 2839 (-95013)	peak 2840 (-59961)	peak 2841 (-36023)
Rnd3	4	peak 304 (+130065)	peak 303 (+159838)	peak 302 (+333248)	peak 301 (+461737)
Sdk1	4	peak 977 (+374480)	peak 978 (+376302)	peak 979 (+582699)	peak 980 (+908504)
Sept10	4	peak 1771 (+12622)	peak 1770 (+26855)	peak 1769 (+271887)	peak 1768 (+350335)
Serpinb8	4	peak 104 (+32287)	peak 105 (+62936)	peak 106 (+692238)	peak 107 (+738925)
Sh3rf1	4	peak 1416 (-12031)	peak 1417 (+71814)	peak 1418 (+180504)	peak 1419 (+193236)
Sik1	4	peak 2758 (+107455)	peak 2757 (+108881)	peak 2756 (+142112)	peak 2755 (+169342)
Slitrk1	4	peak 2441 (+532731)	peak 2440 (+864005)	peak 2439 (+891036)	peak 2438 (+926200)
Smad7	4	peak 2912 (+28881)	peak 2913 (+30737)	peak 2914 (+126659)	peak 2915 (+180074)
Smoc2	4	peak 2731 (-34398)	peak 2732 (+77977)	peak 2733 (+128545)	peak 2734 (+172080)
Stard4	4	peak 2863 (-230406)	peak 2862 (-123589)	peak 2861 (-103393)	peak 2860 (+2067)
Svil	4	peak 2826 (-135011)	peak 2827 (-116755)	peak 2828 (-86181)	peak 2829 (+277911)
Tcte3	4	peak 2740 (-145)	peak 2739 (+16890)	peak 2738 (+31312)	peak 2737 (+48257)
Thsd4	4	peak 1631 (-137171)	peak 1630 (-119136)	peak 1629 (+142386)	peak 1628 (+549971)
Tmem261	4	peak 704 (-955223)	peak 703 (-858101)	peak 702 (-591422)	peak 701 (-579932)
Vrk1	4	peak 2131 (-63669)	peak 2132 (+731481)	peak 2133 (+949499)	peak 2134 (+980722)
Wnt3	4	peak 1995 (-2001)	peak 1996 (-157)	peak 1997 (+51185)	peak 1998 (+59316)
Zbtb43	4	peak 280 (-154379)	peak 279 (-142090)	peak 278 (-132985)	peak 277 (+25156)
Zfp608	4	peak 2890 (-780071)	peak 2889 (-320098)	peak 2888 (-309457)	peak 2887 (+11570)
1700003H04Rik	3	peak 595 (-354606)	peak 594 (-269104)	peak 593 (-188317)
2900026A02Rik	3	peak 946 (-863)	peak 945 (+9386)	peak 944 (+16354)
4933402N22Rik	3	peak 827 (+131990)	peak 828 (+194106)	peak 829 (+289644)
7530416G11Rik	3	peak 2561 (+93390)	peak 2560 (+121048)	peak 2559 (+142758)
Abca4	3	peak 589 (-9161)	peak 590 (+73587)	peak 591 (+103154)
Adarb2	3	peak 2159 (-681842)	peak 2160 (+410332)	peak 2161 (+582342)
Akna	3	peak 693 (-33981)	peak 692 (-17848)	peak 691 (-17270)
Ank3	3	peak 1780 (+376960)	peak 1781 (+392911)	peak 1782 (+394843)
Ankrd50	3	peak 465 (-366106)	peak 464 (-100913)	peak 463 (+337434)
Aph1b	3	peak 1646 (+51112)	peak 1645 (+64306)	peak 1644 (+72709)
Aqp4	3	peak 2848 (-261421)	peak 2847 (-101920)	peak 2846 (+228731)
Atl1	3	peak 2092 (-83519)	peak 2093 (-64577)	peak 2094 (-13543)
Atp6ap1l	3	peak 2293 (+33580)	peak 2292 (+352856)	peak 2291 (+722878)
Axin2	3	peak 2005 (-199956)	peak 2006 (-151437)	peak 2007 (+91531)
Barx2	3	peak 1599 (-98182)	peak 1598 (+198927)	peak 1597 (+318248)
Bcl11b	3	peak 2139 (+144622)	peak 2138 (+285268)	peak 2137 (+430818)
Brinp1	3	peak 699 (-599549)	peak 698 (-130130)	peak 697 (+43288)
Btg1	3	peak 1816 (-367218)	peak 1817 (+31339)	peak 1818 (+59338)
C1d	3	peak 1879 (+428311)	peak 1880 (+431898)	peak 1881 (+499604)
Camta1	3	peak 811 (+96439)	peak 810 (+115420)	peak 809 (+119127)
Capn13	3	peak 2799 (-141296)	peak 2798 (+15862)	peak 2797 (+278835)
Ccnd2	3	peak 1189 (-295828)	peak 1188 (-224877)	peak 1187 (-119961)
Cd109	3	peak 1663 (+548530)	peak 1664 (+550270)	peak 1665 (+683733)
Cd83	3	peak 2228 (+468783)	peak 2229 (+729994)	peak 2230 (+750814)
Cdc42ep4	3	peak 2013 (-59960)	peak 2012 (-15074)	peak 2011 (+14026)
Cdh20	3	peak 101 (+348252)	peak 102 (+394571)	peak 103 (+488677)
Cdkl1	3	peak 2094 (-88855)	peak 2093 (-37821)	peak 2092 (-18879)
Cited2	3	peak 1739 (-466766)	peak 1740 (-462545)	peak 1741 (-366880)
Cldn8	3	peak 2702 (-23800)	peak 2701 (-7366)	peak 2700 (-297)
Cnksr2	3	peak 3037 (-761404)	peak 3036 (-398577)	peak 3035 (-381330)
Cobll1	3	peak 320 (-103664)	peak 319 (-79371)	peak 318 (-29268)
Col9a1	3	peak 28 (+112662)	peak 29 (+334140)	peak 30 (+384890)
Cps1	3	peak 64 (+330430)	peak 65 (+420151)	peak 66 (+838381)
Creg2	3	peak 39 (+29267)	peak 38 (+38358)	peak 37 (+45513)
Csl	3	peak 1822 (-156205)	peak 1821 (+167236)	peak 1820 (+494670)
Ctnnb1	3	peak 1719 (-329259)	peak 1720 (-200515)	peak 1721 (+64516)
Ctnnbl1	3	peak 421 (-38049)	peak 422 (-29233)	peak 423 (+9308)
Cyp26c1	3	peak 2965 (-13475)	peak 2966 (-12628)	peak 2967 (+1459)
D130052B06Rik	3	peak 1898 (+8704)	peak 1899 (+14212)	peak 1900 (+219896)
Dbx1	3	peak 1239 (+26136)	peak 1238 (+86060)	peak 1237 (+322730)
Ddc	3	peak 1876 (-57781)	peak 1875 (+48535)	peak 1874 (+68844)
Ddr1	3	peak 2762 (-32289)	peak 2761 (+3713)	peak 2760 (+6435)
Dennd1b	3	peak 136 (+74588)	peak 137 (+75173)	peak 138 (+217896)
Diras2	3	peak 2238 (-11032)	peak 2237 (+509632)	peak 2236 (+624940)
Dmrt1	3	peak 2953 (-232221)	peak 2954 (-26222)	peak 2955 (+70034)
Dnah2	3	peak 1941 (+77455)	peak 1940 (+79554)	peak 1939 (+91994)
Dpf3	3	peak 2108 (+72288)	peak 2107 (+502094)	peak 2106 (+801829)
Egflam	3	peak 2470 (-314986)	peak 2469 (-118308)	peak 2468 (-44649)
Emcn	3	peak 615 (-431221)	peak 616 (-166482)	peak 617 (-47570)
Eno1b	3	peak 2879 (-475930)	peak 2880 (-373919)	peak 2881 (+770862)
Epha6	3	peak 2672 (+209697)	peak 2671 (+338135)	peak 2670 (+536054)
Ermard	3	peak 2740 (+63)	peak 2741 (+152540)	peak 2742 (+284504)
Fbxl17	3	peak 2782 (+442034)	peak 2781 (+452227)	peak 2780 (+560681)
Fez2	3	peak 2803 (-17442)	peak 2802 (+125793)	peak 2801 (+138034)
Fgf1	3	peak 2876 (-23105)	peak 2875 (+8417)	peak 2874 (+71344)
Fign	3	peak 317 (-873206)	peak 316 (+40766)	peak 315 (+466974)
Fndc1	3	peak 2722 (-45523)	peak 2721 (-16280)	peak 2720 (+159749)
Foxi2	3	peak 1341 (-75432)	peak 1342 (+67225)	peak 1343 (+75511)
Fras1	3	peak 919 (-119855)	peak 920 (+204962)	peak 921 (+206269)
Fto	3	peak 1447 (+53946)	peak 1448 (+181650)	peak 1449 (+310985)
Galc	3	peak 2122 (+50953)	peak 2121 (+309323)	peak 2120 (+612337)
Gdnf	3	peak 2468 (-368011)	peak 2469 (-294352)	peak 2470 (-97674)
Ghr	3	peak 2464 (-389400)	peak 2463 (+81297)	peak 2462 (+128936)
Gli2	3	peak 113 (-351263)	peak 112 (+3105)	peak 111 (+113415)
Gm10295	3	peak 1258 (-105456)	peak 1257 (+533396)	peak 1256 (+645055)
Gm10549	3	peak 2864 (+401664)	peak 2865 (+412656)	peak 2866 (+431271)
Gm10715	3	peak 1562 (-4469)	peak 1563 (-834)	peak 1564 (+221732)
Gm10718	3	peak 1555 (-3079)	peak 1556 (-1496)	peak 1557 (+483)
Gm10719	3	peak 1553 (-4706)	peak 1554 (-2226)	peak 1555 (+313)
Gm10720	3	peak 1551 (-3658)	peak 1552 (-2053)	peak 1553 (-205)
Gm10800	3	peak 355 (+517)	peak 354 (+2236)	peak 353 (+3409)
Gm11168	3	peak 1546 (-940)	peak 1547 (+1860)	peak 1548 (+3554)
Gm13090	3	peak 809 (+653049)	peak 810 (+656756)	peak 811 (+675737)
Gm1587	3	peak 2406 (+559893)	peak 2405 (+588822)	peak 2404 (+589883)
Gm4791	3	peak 1614 (-521994)	peak 1615 (-37262)	peak 1616 (+362851)
Gpr26	3	peak 1331 (-356388)	peak 1332 (-188325)	peak 1333 (+111994)
Gria2	3	peak 523 (+288485)	peak 522 (+539608)	peak 521 (+664054)
Has2	3	peak 2528 (-445932)	peak 2527 (-11690)	peak 2526 (+5498)
Hes1	3	peak 2627 (-246473)	peak 2628 (-242294)	peak 2629 (+68953)
Hist1h2ae	3	peak 2189 (-3435)	peak 2188 (-355)	peak 2187 (+334)
Hmgn3	3	peak 1670 (-243062)	peak 1669 (-204635)	peak 1668 (+85268)
Hoxc4	3	peak 2595 (-18739)	peak 2596 (+7741)	peak 2597 (+40504)
Inhba	3	peak 2167 (-460929)	peak 2168 (+340375)	peak 2169 (+463345)
Irs2	3	peak 1367 (-255547)	peak 1366 (+375422)	peak 1365 (+553884)
Irx5	3	peak 1450 (-77190)	peak 1451 (+16008)	peak 1452 (+30338)
Irx6	3	peak 1451 (-300531)	peak 1452 (-286201)	peak 1453 (+72308)
Jcad	3	peak 2826 (+150600)	peak 2827 (+168856)	peak 2828 (+199430)
Kcnip4	3	peak 875 (+204693)	peak 874 (+244264)	peak 873 (+257835)
Kcnma1	3	peak 2355 (-210499)	peak 2354 (+568162)	peak 2353 (+620518)
Kdm6b	3	peak 1941 (-57978)	peak 1940 (-55879)	peak 1939 (-43439)
Khdrbs3	3	peak 2540 (+622822)	peak 2541 (+871546)	peak 2542 (+946704)
Krt5	3	peak 2589 (-20077)	peak 2588 (-3181)	peak 2587 (-117)
Lcorl	3	peak 871 (-968144)	peak 870 (-967479)	peak 869 (-372988)
Lekr1	3	peak 507 (-11111)	peak 508 (+238070)	peak 509 (+238706)
Lipi	3	peak 2688 (+591051)	peak 2687 (+779122)	peak 2686 (+962373)
Lmntd1	3	peak 1209 (-43918)	peak 1208 (+65419)	peak 1207 (+157601)
Lpp	3	peak 2617 (-336128)	peak 2618 (+555104)	peak 2619 (+760665)
Lrtm1	3	peak 2360 (-138380)	peak 2361 (-45331)	peak 2362 (+347144)
Lypd6b	3	peak 298 (-78779)	peak 299 (+38122)	peak 300 (+256716)
Maml2	3	peak 1577 (-347652)	peak 1578 (-136399)	peak 1579 (+28047)
Mdfic	3	peak 1012 (-741048)	peak 1013 (-110812)	peak 1014 (+476802)
Med13l	3	peak 951 (-205690)	peak 952 (-186927)	peak 953 (+913287)
Meis1	3	peak 1884 (-585460)	peak 1883 (-130450)	peak 1882 (+977203)
Meox2	3	peak 2055 (-681838)	peak 2056 (-673167)	peak 2057 (-503142)
Myof	3	peak 2970 (+27791)	peak 2969 (+274427)	peak 2968 (+275229)
Nabp1	3	peak 50 (-51678)	peak 49 (-30852)	peak 48 (-30068)
Ndst4	3	peak 593 (-634668)	peak 594 (-553881)	peak 595 (-468379)
Ngf	3	peak 567 (-207062)	peak 568 (+2113)	peak 569 (+37514)
Nlgn1	3	peak 452 (+1293)	peak 451 (+289222)	peak 450 (+795341)
Npr3	3	peak 2479 (+69000)	peak 2478 (+147291)	peak 2477 (+175958)
Npvf	3	peak 1070 (-422561)	peak 1069 (-337504)	peak 1068 (-328704)
Nr2f2	3	peak 1257 (-457496)	peak 1256 (-345837)	peak 1255 (+59892)
Nrep	3	peak 2863 (+19366)	peak 2862 (+126183)	peak 2861 (+146379)
Nsun3	3	peak 2675 (-12897)	peak 2674 (+326264)	peak 2673 (+893175)
Ntf3	3	peak 1186 (-237759)	peak 1185 (-208794)	peak 1184 (+23800)
Nucb2	3	peak 1308 (-3861)	peak 1309 (+170215)	peak 1310 (+173751)
Nxph1	3	peak 1006 (+121480)	peak 1007 (+123906)	peak 1008 (+941387)
Nyap2	3	peak 83 (+134388)	peak 84 (+494327)	peak 85 (+528513)
Pabpc6	3	peak 2726 (-464889)	peak 2725 (-458561)	peak 2724 (-109367)
Pcp4l1	3	peak 184 (+2207)	peak 183 (+2980)	peak 182 (+7825)
Pdgfra	3	peak 900 (+110538)	peak 901 (+117721)	peak 902 (+233805)
Phf14	3	peak 1009 (+63022)	peak 1010 (+655572)	peak 1011 (+768067)
Ppp1cb	3	peak 855 (-178867)	peak 856 (-77674)	peak 857 (-53251)
Prickle1	3	peak 2574 (-273132)	peak 2573 (+42643)	peak 2572 (+50676)
Prok2	3	peak 1133 (-413921)	peak 1132 (-407083)	peak 1131 (-186913)
Rasgrp1	3	peak 379 (-731196)	peak 378 (-136646)	peak 377 (-134772)
Rbm20	3	peak 2993 (+128958)	peak 2994 (+129570)	peak 2995 (+182610)
Rbm26	3	peak 2436 (+461434)	peak 2435 (+482697)	peak 2434 (+527848)
Rdh10	3	peak 6 (+89236)	peak 7 (+106968)	peak 8 (+108020)
Rnf149	3	peak 39 (-44802)	peak 38 (-35711)	peak 37 (-28556)
Rnls	3	peak 2962 (+352537)	peak 2961 (+503587)	peak 2960 (+506237)
Rps6ka2	3	peak 2717 (-77521)	peak 2718 (-54403)	peak 2719 (+61756)
Rps6ka3	3	peak 3035 (-831234)	peak 3036 (-813987)	peak 3037 (-451160)
Rybp	3	peak 1133 (+147211)	peak 1132 (+154049)	peak 1131 (+374219)
Scn8a	3	peak 2582 (-49953)	peak 2583 (+39116)	peak 2584 (+199244)
Sema3c	3	peak 841 (-17970)	peak 842 (+72898)	peak 843 (+74413)
Sh3bgrl2	3	peak 1671 (-66030)	peak 1672 (+27960)	peak 1673 (+68624)
Six2	3	peak 2818 (-350830)	peak 2817 (-271860)	peak 2816 (-210752)
Skap2	3	peak 1073 (-103782)	peak 1072 (-44776)	peak 1071 (+244076)
Slc2a13	3	peak 2571 (-4505)	peak 2570 (+2135)	peak 2569 (+189697)
Slc38a11	3	peak 320 (+21736)	peak 319 (+46029)	peak 318 (+96132)
Slc41a2	3	peak 1800 (+239596)	peak 1799 (+325739)	peak 1798 (+344675)
Smarca2	3	peak 2956 (-360824)	peak 2957 (-346137)	peak 2958 (+104128)
Sorcs3	3	peak 2989 (+291590)	peak 2990 (+292434)	peak 2991 (+427786)
Sox11	3	peak 2041 (-886322)	peak 2040 (-604748)	peak 2039 (+365689)
Spry1	3	peak 460 (-43391)	peak 461 (+14078)	peak 462 (+27822)
Spry4	3	peak 2875 (-309086)	peak 2874 (-246159)	peak 2873 (+16923)
Srbd1	3	peak 2818 (+106071)	peak 2817 (+185041)	peak 2816 (+246149)
Stac	3	peak 1709 (-484568)	peak 1708 (-410208)	peak 1707 (+243347)
Sucnr1	3	peak 499 (-36584)	peak 500 (-36130)	peak 501 (+227600)
Tars	3	peak 2479 (-437016)	peak 2478 (-358725)	peak 2477 (-330058)
Tenm4	3	peak 1283 (-861374)	peak 1284 (-363545)	peak 1285 (+44685)
Thbs2	3	peak 2734 (+242676)	peak 2733 (+286211)	peak 2732 (+336779)
Tle3	3	peak 1632 (-199975)	peak 1633 (+242259)	peak 1634 (+307536)
Tle4	3	peak 2941 (-67801)	peak 2940 (-6870)	peak 2939 (+488681)
Tprg	3	peak 2618 (-338363)	peak 2619 (-132802)	peak 2620 (+120885)
Trim32	3	peak 694 (-471891)	peak 695 (-457880)	peak 696 (+33481)
Ubash3b	3	peak 1606 (-268955)	peak 1605 (-144567)	peak 1604 (+126226)
Vgll3	3	peak 2678 (+19315)	peak 2679 (+53438)	peak 2680 (+817142)
Wnt10b	3	peak 2580 (-2948)	peak 2579 (-2309)	peak 2578 (+2386)
Wnt9b	3	peak 1994 (+27577)	peak 1993 (+37641)	peak 1992 (+44791)
Xrcc4	3	peak 2293 (-782167)	peak 2292 (-462891)	peak 2291 (-92869)
Zeb2	3	peak 290 (-641104)	peak 289 (+13994)	peak 288 (+14927)
Zfp462	3	peak 683 (-985535)	peak 684 (+28089)	peak 685 (+31983)
Zfp804a	3	peak 339 (-871891)	peak 340 (-564194)	peak 341 (-405693)
Znrf3	3	peak 1865 (-6093)	peak 1864 (+17399)	peak 1863 (+130345)
1190002N15Rik	2	peak 1677 (+824729)	peak 1676 (+851263)
1700015G11Rik	2	peak 1241 (-999715)	peak 1240 (-607903)
1700029H14Rik	2	peak 1371 (-61305)	peak 1370 (-16156)
1700056E22Rik	2	peak 204 (+364367)	peak 203 (+389770)
1810013L24Rik	2	peak 2600 (+264241)	peak 2601 (+528754)
2410131K14Rik	2	peak 951 (+109822)	peak 952 (+128585)
4930452B06Rik	2	peak 2341 (-612299)	peak 2340 (+258892)
4930546C10Rik	2	peak 2907 (-231692)	peak 2906 (+257952)
4930583I09Rik	2	peak 2784 (-117124)	peak 2783 (-37627)
4931417E11Rik	2	peak 1092 (-417267)	peak 1091 (+94923)
4931429L15Rik	2	peak 1615 (-641493)	peak 1614 (-156761)
A1bg	2	peak 2534 (+74713)	peak 2533 (+79356)
A3galt2	2	peak 770 (-43455)	peak 771 (-21854)
Aadac	2	peak 499 (+13524)	peak 500 (+13978)
Ackr3	2	peak 95 (+220661)	peak 96 (+223504)
Acpp	2	peak 1699 (-23982)	peak 1698 (-10406)
Adgrd1	2	peak 960 (-50395)	peak 961 (+357547)
Adgrg6	2	peak 1738 (-29475)	peak 1737 (+379994)
Adgrl3	2	peak 907 (+339780)	peak 908 (+693427)
Adh1	2	peak 619 (-5578)	peak 620 (+26409)
Adrb1	2	peak 3002 (-53152)	peak 3003 (+84892)
Agmo	2	peak 2058 (+208208)	peak 2059 (+451676)
Agpat4	2	peak 2727 (-35415)	peak 2728 (+147357)
Ajap1	2	peak 813 (+329681)	peak 812 (+988292)
Akain1	2	peak 2787 (+414140)	peak 2788 (+927995)
Aldh1a3	2	peak 1250 (-240550)	peak 1249 (-15595)
Amph	2	peak 2171 (+229578)	peak 2172 (+398049)
Ank2	2	peak 598 (+332886)	peak 597 (+777395)
Anxa3	2	peak 920 (-214468)	peak 921 (-213161)
Ap5m1	2	peak 2368 (-230326)	peak 2369 (+359)
Arap3	2	peak 2872 (-202631)	peak 2871 (-158732)
Arhgap10	2	peak 1434 (+23087)	peak 1433 (+237643)
Arhgap23	2	peak 1979 (-86349)	peak 1980 (-18660)
Arhgap26	2	peak 2876 (-51269)	peak 2877 (-2536)
Arhgap29	2	peak 588 (-54929)	peak 589 (+82053)
Arhgap42	2	peak 1574 (+20108)	peak 1573 (+39551)
Arhgef11	2	peak 536 (-87059)	peak 537 (+58744)
Arhgef38	2	peak 611 (+45649)	peak 610 (+76444)
Arl15	2	peak 2321 (-123781)	peak 2322 (+372011)
Arl4a	2	peak 2062 (+214590)	peak 2061 (+235717)
Armc8	2	peak 1688 (+86480)	peak 1687 (+91258)
Art4	2	peak 1199 (-28)	peak 1198 (+1195)
Asb7	2	peak 1250 (+21529)	peak 1249 (+246484)
Ate1	2	peak 1326 (+178838)	peak 1325 (+191490)
Atp13a3	2	peak 2631 (-124424)	peak 2630 (-69937)
Atp1a1	2	peak 565 (-108673)	peak 564 (+32416)
Atrnl1	2	peak 3006 (+450006)	peak 3007 (+534751)
B3gnt2	2	peak 1893 (-14709)	peak 1892 (+223690)
Bahcc1	2	peak 2018 (-71559)	peak 2019 (-56869)
BC048403	2	peak 1849 (+89421)	peak 1850 (+215977)
BC107364	2	peak 555 (+78127)	peak 554 (+92378)
Bcat1	2	peak 1206 (+441520)	peak 1205 (+505394)
Bcl11a	2	peak 1894 (+633959)	peak 1895 (+653331)
Bfsp2	2	peak 1696 (-104725)	peak 1695 (+36908)
Blcap	2	peak 422 (-141807)	peak 421 (-132991)
Bmper	2	peak 1588 (-467451)	peak 1589 (+264107)
Btbd16	2	peak 1327 (-96690)	peak 1328 (+60488)
Btbd19	2	peak 755 (+20148)	peak 754 (+27029)
Btbd3	2	peak 395 (-871859)	peak 396 (-10725)
Btg3	2	peak 2691 (-96841)	peak 2690 (-54565)
Bub3	2	peak 1331 (+49850)	peak 1332 (+217913)
Bysl	2	peak 2770 (+89117)	peak 2769 (+91653)
C1galt1	2	peak 1002 (+51263)	peak 1003 (+99043)
C8a	2	peak 746 (-12724)	peak 745 (+45793)
Cacnb2	2	peak 244 (+219079)	peak 245 (+313420)
Camk4	2	peak 2859 (-601)	peak 2860 (+272754)
Capn8	2	peak 200 (+121555)	peak 201 (+137258)
Cartpt	2	peak 2301 (+270248)	peak 2300 (+275152)
Ccdc152	2	peak 2463 (-198407)	peak 2462 (-150768)
Ccdc82	2	peak 1577 (+67840)	peak 1578 (+279093)
Ccnd3	2	peak 2769 (+14788)	peak 2770 (+17324)
Ccnl1	2	peak 509 (+53315)	peak 508 (+53951)
Cd36	2	peak 843 (+201098)	peak 842 (+202613)
Cdh19	2	peak 109 (-719611)	peak 108 (+271067)
Cdk17	2	peak 1808 (+100714)	peak 1809 (+123727)
Cdk20	2	peak 2261 (-31129)	peak 2262 (+39900)
Cdkal1	2	peak 2197 (-91781)	peak 2196 (-15278)
Cebpb	2	peak 428 (+150522)	peak 429 (+161214)
Cemip	2	peak 1274 (-4530)	peak 1273 (+22815)
Cep112	2	peak 2005 (+295127)	peak 2006 (+343646)
Cerk	2	peak 2564 (-9043)	peak 2563 (+35328)
Chst9	2	peak 2848 (+52941)	peak 2847 (+212442)
Clrn1	2	peak 498 (+131457)	peak 497 (+140602)
Clrn3	2	peak 1343 (+42835)	peak 1342 (+51121)
CN725425	2	peak 2569 (+184070)	peak 2570 (+371632)
Cnbd2	2	peak 416 (-93683)	peak 417 (-78547)
Cntn4	2	peak 1136 (+884140)	peak 1137 (+976816)
Cntnap5b	2	peak 99 (-455024)	peak 100 (+377451)
Cog6	2	peak 487 (+353837)	peak 486 (+477115)
Col26a1	2	peak 969 (+168443)	peak 968 (+180751)
Col28a1	2	peak 1003 (+248732)	peak 1002 (+296512)
Col5a1	2	peak 269 (-182927)	peak 270 (-141311)
Cops8	2	peak 95 (-178340)	peak 96 (-175497)
Cox7a2l	2	peak 2807 (-6124)	peak 2806 (+129166)
Cpne4	2	peak 1698 (-221349)	peak 1699 (-207773)
Cradd	2	peak 1815 (+216255)	peak 1814 (+225592)
Crim1	2	peak 2801 (+79849)	peak 2802 (+92090)
Crtc3	2	peak 1267 (-103115)	peak 1266 (+111089)
Crybb3	2	peak 945 (-47490)	peak 944 (-40522)
Cryl1	2	peak 2381 (+21479)	peak 2380 (+150950)
Cstad	2	peak 274 (+41855)	peak 275 (+92370)
Cul1	2	peak 1042 (-194489)	peak 1043 (-184273)
Cux1	2	peak 967 (-90012)	peak 966 (-41839)
Cwc22	2	peak 336 (-533747)	peak 335 (-298646)
Cxcl12	2	peak 1176 (-393333)	peak 1177 (+78785)
Cxcr4	2	peak 122 (-321565)	peak 121 (-57423)
Cyp51	2	peak 823 (+50687)	peak 822 (+51437)
Cyr61	2	peak 629 (-58894)	peak 628 (+15103)
D16Ertd472e	2	peak 2691 (+103006)	peak 2690 (+145282)
D1Pas1	2	peak 208 (-158765)	peak 209 (-78069)
Dapk1	2	peak 2257 (-293804)	peak 2258 (-203068)
Dcn	2	peak 1817 (-831264)	peak 1818 (-803265)
Ddah1	2	peak 629 (-49800)	peak 630 (+22370)
Derl1	2	peak 2530 (+28525)	peak 2529 (+53721)
Dgkb	2	peak 2058 (-430856)	peak 2059 (-187388)
Dgki	2	peak 1036 (+807)	peak 1035 (+141010)
Dhrs3	2	peak 796 (-758)	peak 797 (+171970)
Diaph3	2	peak 2414 (+19028)	peak 2413 (+942047)
Dicer1	2	peak 2129 (+8211)	peak 2128 (+109494)
Diexf	2	peak 219 (-12598)	peak 218 (-11275)
Dip2c	2	peak 2162 (-179305)	peak 2163 (-159611)
Dlg5	2	peak 2356 (-4897)	peak 2355 (+31216)
Dlgap1	2	peak 2787 (-571328)	peak 2788 (-57473)
Dll1	2	peak 2742 (+49831)	peak 2741 (+181795)
Dlx1	2	peak 326 (+11702)	peak 327 (+13339)
Dlx2	2	peak 327 (+5302)	peak 326 (+6939)
Dlx4	2	peak 1977 (-79358)	peak 1976 (-35912)
Dmrt2	2	peak 2956 (+571808)	peak 2957 (+586495)
Dock1	2	peak 1339 (-167734)	peak 1340 (+232517)
Dock8	2	peak 2951 (+65536)	peak 2952 (+100546)
Dpyd	2	peak 586 (+242225)	peak 587 (+478331)
Dsc1	2	peak 2853 (-113894)	peak 2852 (-73606)
Dsg1c	2	peak 2852 (-58961)	peak 2853 (-18673)
Dusp6	2	peak 1820 (+1757)	peak 1821 (+329191)
Dynlrb2	2	peak 1471 (-473184)	peak 1472 (-402029)
E130114P18Rik	2	peak 737 (-328165)	peak 736 (-297648)
E2f3	2	peak 2197 (+38608)	peak 2196 (+115111)
Edn1	2	peak 2223 (-161670)	peak 2224 (+54510)
Ednrb	2	peak 2433 (-48111)	peak 2432 (+96120)
Efna1	2	peak 543 (-7542)	peak 542 (-2727)
Egfem1	2	peak 454 (+185097)	peak 455 (+298562)
Egfl7	2	peak 266 (-29367)	peak 267 (-26912)
Eif4g3	2	peak 787 (-26182)	peak 788 (+208413)
Elac2	2	peak 1932 (-119132)	peak 1933 (+71196)
Elk3	2	peak 1809 (+26518)	peak 1808 (+49531)
Elovl4	2	peak 1673 (+189300)	peak 1672 (+229964)
Elovl5	2	peak 1661 (+10248)	peak 1662 (+128028)
En2	2	peak 851 (-54928)	peak 852 (+33993)
Epgn	2	peak 911 (-37535)	peak 912 (-156)
Epm2a	2	peak 1734 (+12916)	peak 1735 (+148751)
Erap1	2	peak 2279 (-110648)	peak 2280 (-109447)
Exoc4	2	peak 1031 (+253525)	peak 1032 (+746801)
Exoc6	2	peak 2965 (+121688)	peak 2966 (+122535)
Eya1	2	peak 4 (-269915)	peak 3 (+625761)
Ezr	2	peak 2716 (+31224)	peak 2715 (+104505)
Fam105a	2	peak 2490 (-245524)	peak 2489 (-71456)
Fam129a	2	peak 147 (+79508)	peak 148 (+86034)
Fam160b1	2	peak 3004 (-88222)	peak 3005 (+81536)
Fam189a2	2	peak 2950 (-67758)	peak 2949 (+245480)
Fam19a2	2	peak 1852 (+95461)	peak 1853 (+556471)
Fam19a4	2	peak 1123 (-58044)	peak 1122 (+150626)
Fam19a5	2	peak 2565 (-592623)	peak 2566 (-303385)
Fam205a2	2	peak 679 (+18276)	peak 678 (+191559)
Fam205a3	2	peak 678 (+18282)	peak 679 (+191565)
Fam69a	2	peak 937 (-36933)	peak 936 (-34406)
Fam81b	2	peak 2284 (-79123)	peak 2283 (+62011)
Fam83f	2	peak 2551 (-22644)	peak 2552 (-9208)
Fam84b	2	peak 2534 (-21477)	peak 2533 (-16834)
Faxc	2	peak 662 (+334451)	peak 663 (+338774)
Fbxl4	2	peak 662 (-91761)	peak 663 (-87438)
Fbxw7	2	peak 533 (+156459)	peak 534 (+359860)
Fcgr1	2	peak 555 (-80210)	peak 554 (-65959)
Fignl1	2	peak 1875 (-40647)	peak 1874 (-20338)
Fignl2	2	peak 2584 (+8640)	peak 2583 (+168768)
Fmo4	2	peak 167 (-51679)	peak 166 (+29678)
Fos	2	peak 2111 (+107740)	peak 2112 (+111958)
Fosl2	2	peak 853 (-337022)	peak 854 (-14528)
Foxc1	2	peak 2200 (+57044)	peak 2201 (+372759)
Foxo1	2	peak 486 (+271786)	peak 487 (+395064)
Foxp2	2	peak 1012 (+78264)	peak 1013 (+708500)
Foxq1	2	peak 2198 (-332832)	peak 2199 (-150620)
Fstl4	2	peak 1921 (-237467)	peak 1922 (+339344)
Ftmt	2	peak 2883 (-21532)	peak 2884 (+52612)
Fyb2	2	peak 746 (-24349)	peak 747 (+142905)
Gadd45a	2	peak 1085 (-191376)	peak 1084 (-97639)
Gap43	2	peak 2648 (-153073)	peak 2647 (+701184)
Gatb	2	peak 533 (-602392)	peak 534 (-398991)
Gclm	2	peak 590 (-127527)	peak 591 (-97960)
Gcm1	2	peak 1661 (-124312)	peak 1662 (-6532)
Gfra1	2	peak 3007 (+309613)	peak 3006 (+394358)
Ggh	2	peak 660 (+290065)	peak 661 (+485200)
Glcci1	2	peak 1004 (+136271)	peak 1005 (+155214)
Gm10073	2	peak 1464 (+9324)	peak 1463 (+44721)
Gm10309	2	peak 2820 (-70912)	peak 2819 (+11192)
Gm13272	2	peak 723 (-3035)	peak 724 (-99)
Gm13275	2	peak 728 (-3029)	peak 729 (-126)
Gm13277	2	peak 726 (-3004)	peak 727 (-93)
Gm13278	2	peak 727 (-3011)	peak 728 (-92)
Gm13279	2	peak 729 (-3036)	peak 730 (-82)
Gm13283	2	peak 720 (+645)	peak 721 (+3570)
Gm13285	2	peak 730 (-2350)	peak 731 (+565)
Gm13287	2	peak 731 (-3024)	peak 732 (-103)
Gm13288	2	peak 732 (-2380)	peak 733 (+608)
Gm13289	2	peak 722 (-3035)	peak 723 (-107)
Gm13290	2	peak 721 (-10145)	peak 722 (+53)
Gm1604b	2	peak 2717 (+66757)	peak 2718 (+89875)
Gm16485	2	peak 1573 (+227759)	peak 1574 (+247202)
Gm16519	2	peak 2789 (-40253)	peak 2790 (+34713)
Gm4950	2	peak 2883 (-444123)	peak 2882 (+345823)
Gm5416	2	peak 2638 (-2079)	peak 2639 (+2355)
Gm5447	2	peak 2198 (+249098)	peak 2199 (+431310)
Gm826	2	peak 425 (+178719)	peak 424 (+880915)
Gm9008	2	peak 1094 (-636254)	peak 1093 (-620914)
Gmds	2	peak 2201 (+159348)	peak 2200 (+475063)
Gna14	2	peak 2943 (-258193)	peak 2944 (-232627)
Gnaq	2	peak 2943 (+44643)	peak 2944 (+70209)
Gpr22	2	peak 2050 (-192161)	peak 2049 (-55102)
Gpsm1	2	peak 264 (-3603)	peak 265 (+23173)
Grap2	2	peak 2551 (+25698)	peak 2552 (+39134)
Grasp	2	peak 2585 (+8640)	peak 2586 (+11318)
Grik2	2	peak 1764 (-790839)	peak 1763 (+164884)
Grin2a	2	peak 2601 (+636069)	peak 2600 (+900582)
Grip1	2	peak 1840 (-175064)	peak 1841 (+275793)
Gsc	2	peak 2129 (-270411)	peak 2128 (-169128)
Gtf2h4	2	peak 2761 (-27147)	peak 2760 (-24425)
Hapln1	2	peak 2288 (-195377)	peak 2289 (+7905)
Hbp1	2	peak 2050 (+44448)	peak 2049 (+181507)
Hhip	2	peak 1436 (-120622)	peak 1435 (+50931)
Hhipl2	2	peak 203 (+225766)	peak 204 (+251169)
Hist1h2ah	2	peak 2184 (-444)	peak 2183 (+220)
Hist1h2ai	2	peak 2176 (-412)	peak 2177 (+218)
Hist1h2bg	2	peak 2187 (-510)	peak 2188 (+179)
Hist1h2bk	2	peak 2183 (-522)	peak 2184 (+142)
Hist1h2bl	2	peak 2177 (-497)	peak 2176 (+133)
Hist1h2bp	2	peak 2179 (-4279)	peak 2180 (-425)
Hist1h3i	2	peak 2180 (-3666)	peak 2179 (+188)
Hmgcs1	2	peak 2330 (+5395)	peak 2331 (+53318)
Hoxa1	2	peak 1073 (+41986)	peak 1072 (+100992)
Hoxc13	2	peak 2593 (-154045)	peak 2594 (+907)
Hs3st1	2	peak 866 (+402760)	peak 865 (+711765)
Hs3st3b1	2	peak 1931 (+61538)	peak 1930 (+143469)
Htra1	2	peak 1329 (+25419)	peak 1330 (+46382)
Hunk	2	peak 2705 (+58766)	peak 2706 (+326561)
Ica1	2	peak 1005 (+113670)	peak 1004 (+132613)
Ice1	2	peak 2266 (+122456)	peak 2265 (+647032)
Id3	2	peak 780 (-61705)	peak 781 (+3431)
Ifne	2	peak 735 (-198400)	peak 734 (-27633)
Ifnz	2	peak 724 (-2380)	peak 725 (+649)
Igf1r	2	peak 1252 (+5173)	peak 1253 (+108805)
Igf2bp2	2	peak 2615 (+54041)	peak 2614 (+55478)
Igfbp7	2	peak 906 (-535807)	peak 905 (+13704)
Il10	2	peak 123 (-72480)	peak 124 (+44532)
Il15	2	peak 1438 (+140826)	peak 1437 (+615388)
Il5ra	2	peak 1137 (+94476)	peak 1136 (+187152)
Impad1	2	peak 653 (+119742)	peak 652 (+567433)
Inpp4b	2	peak 1437 (+445272)	peak 1438 (+919834)
Insm1	2	peak 403 (-155562)	peak 404 (+43051)
Ints12	2	peak 610 (+66605)	peak 611 (+97400)
Irf6	2	peak 218 (-11564)	peak 219 (-10241)
Ism2	2	peak 2116 (-30083)	peak 2115 (-6835)
Itgb5	2	peak 2634 (+41976)	peak 2635 (+78212)
Itih5	2	peak 240 (+33240)	peak 241 (+34231)
Jdp2	2	peak 2111 (-17397)	peak 2112 (-13179)
Kbtbd8	2	peak 1118 (-354699)	peak 1119 (+179258)
Kcna5	2	peak 1186 (+130938)	peak 1185 (+159903)
Kcnd3	2	peak 573 (-237243)	peak 574 (+189011)
Kcne2	2	peak 2707 (-197805)	peak 2708 (-193469)
Kctd15	2	peak 1232 (-62153)	peak 1231 (+49196)
Kctd3	2	peak 212 (+87774)	peak 211 (+347260)
Kdm4a	2	peak 759 (-97059)	peak 758 (-92064)
Kif16b	2	peak 401 (+209204)	peak 400 (+606479)
Kif26a	2	peak 2148 (-12719)	peak 2149 (+36338)
Kif2a	2	peak 2311 (-911585)	peak 2310 (-837191)
Kitl	2	peak 1822 (-99767)	peak 1823 (+35833)
Kl	2	peak 994 (+43944)	peak 995 (+197080)
Klf3	2	peak 889 (-361615)	peak 890 (-266406)
Klhl13	2	peak 3012 (-18549)	peak 3011 (+287)
Kras	2	peak 1208 (-119267)	peak 1207 (-27085)
Kremen1	2	peak 1864 (-165890)	peak 1863 (-52944)
Krr1	2	peak 1831 (-329656)	peak 1832 (-169025)
Krtap24-1	2	peak 2702 (+25296)	peak 2701 (+41730)
L3mbtl3	2	peak 1754 (-393435)	peak 1753 (-17320)
Lao1	2	peak 760 (+57617)	peak 761 (+111345)
Laptm4a	2	peak 2029 (-44095)	peak 2030 (-32766)
Larp4b	2	peak 2162 (+3342)	peak 2163 (+23036)
Lars2	2	peak 1722 (+82830)	peak 1723 (+95068)
Lbx1	2	peak 2981 (-88954)	peak 2980 (-82021)
Lclat1	2	peak 2797 (+12467)	peak 2798 (+275440)
Lep	2	peak 1026 (-182120)	peak 1027 (+72572)
Lepr	2	peak 740 (-8377)	peak 741 (+117134)
Limd1	2	peak 1722 (-28949)	peak 1723 (-16711)
Lix1l	2	peak 556 (+19943)	peak 557 (+20372)
Lmo4	2	peak 626 (-172853)	peak 625 (+382206)
Lpcat1	2	peak 2276 (-125651)	peak 2277 (-84431)
Lrfn2	2	peak 2771 (-463953)	peak 2772 (-110098)
Lrguk	2	peak 1031 (-526838)	peak 1032 (-33562)
Lrrc1	2	peak 1659 (+47575)	peak 1658 (+80230)
Lrrc4	2	peak 1026 (-46353)	peak 1025 (+172185)
Lrrc49	2	peak 1631 (+39952)	peak 1630 (+57987)
Lrrc4c	2	peak 350 (-465350)	peak 351 (-423550)
Lrrc73	2	peak 2767 (+12180)	peak 2768 (+23569)
Luzp2	2	peak 1243 (-635501)	peak 1244 (+173905)
Ly75	2	peak 312 (-161391)	peak 311 (-86083)
Lypd6	2	peak 299 (-240654)	peak 300 (-22060)
Lyrm2	2	peak 669 (-1135)	peak 670 (+54964)
Mab21l3	2	peak 566 (-81658)	peak 565 (+122866)
Maf	2	peak 1472 (-395192)	peak 1471 (-324037)
Malrd1	2	peak 246 (+49062)	peak 247 (+108991)
Man1c1	2	peak 778 (-19855)	peak 777 (+39359)
Map1b	2	peak 2301 (-113853)	peak 2300 (-108949)
Mapk10	2	peak 930 (-98777)	peak 929 (+716340)
Mbnl2	2	peak 2450 (-137711)	peak 2451 (+42962)
Mbtps1	2	peak 1475 (+9710)	peak 1474 (+12825)
Mctp2	2	peak 1259 (-481843)	peak 1258 (+849667)
Mdga1	2	peak 2752 (+34623)	peak 2751 (+35009)
Mecom	2	peak 455 (+631861)	peak 454 (+745326)
Med10	2	peak 2265 (+180761)	peak 2266 (+705337)
Megf6	2	peak 814 (+47092)	peak 815 (+53621)
Metap2	2	peak 1811 (-17844)	peak 1810 (+49295)
Mis18a	2	peak 2706 (+14446)	peak 2705 (+282241)
Mlip	2	peak 1659 (-149425)	peak 1658 (-116770)
Mllt3	2	peak 718 (+50736)	peak 717 (+328736)
Mllt6	2	peak 1981 (-965)	peak 1982 (+1702)
Morc1	2	peak 2653 (+194449)	peak 2654 (+329969)
Mrpl1	2	peak 918 (-33051)	peak 919 (+44607)
Mrpl36	2	peak 2276 (+10558)	peak 2277 (+51778)
Mrps23	2	peak 1969 (-81176)	peak 1970 (+72605)
Msi2	2	peak 1972 (-52644)	peak 1971 (+133296)
Msx1	2	peak 864 (-78444)	peak 863 (+7265)
Mtap	2	peak 734 (-229288)	peak 735 (-58521)
Mtf2	2	peak 936 (-44251)	peak 937 (-41724)
Mup20	2	peak 689 (+18584)	peak 688 (+119821)
Mup5	2	peak 689 (-200341)	peak 688 (-99104)
Myo16	2	peak 1365 (+300606)	peak 1366 (+479068)
Myo5b	2	peak 2910 (-154519)	peak 2911 (+96839)
Myom2	2	peak 1372 (+332819)	peak 1373 (+462299)
Myrfl	2	peak 1837 (+147338)	peak 1836 (+153025)
Nab1	2	peak 55 (+206890)	peak 54 (+258101)
Nalcn	2	peak 2456 (+34145)	peak 2455 (+60434)
Napg	2	peak 2899 (+17036)	peak 2900 (+155845)
Net1	2	peak 2157 (+40296)	peak 2156 (+40839)
Nfam1	2	peak 2557 (-56137)	peak 2556 (+22324)
Nhsl1	2	peak 1743 (-36641)	peak 1744 (+63382)
Nim1k	2	peak 2331 (+12100)	peak 2330 (+60023)
Nkain3	2	peak 661 (+251315)	peak 660 (+446450)
Nkx2-3	2	peak 2974 (-65703)	peak 2975 (+50341)
Nme9	2	peak 1687 (+26166)	peak 1688 (+30944)
Nol11	2	peak 2002 (-266061)	peak 2001 (-62811)
Notch1	2	peak 267 (-50322)	peak 266 (-47867)
Npas3	2	peak 2076 (-498442)	peak 2077 (+274168)
Nphp4	2	peak 812 (+16377)	peak 813 (+674988)
Npnt	2	peak 609 (+40120)	peak 608 (+96263)
Nr2e3	2	peak 1629 (-418532)	peak 1628 (-10947)
Nr3c2	2	peak 1433 (+380538)	peak 1434 (+595094)
Nr4a1	2	peak 2585 (-33999)	peak 2586 (-31321)
Nr5a2	2	peak 134 (-857488)	peak 133 (-518196)
Nrp2	2	peak 60 (-112688)	peak 61 (-53971)
Nrxn3	2	peak 2117 (+196365)	peak 2118 (+488201)
Nsf	2	peak 1998 (+120590)	peak 1997 (+128721)
Nsun6	2	peak 245 (+137158)	peak 244 (+231499)
Oacyl	2	peak 2903 (-99353)	peak 2904 (+86340)
Oat	2	peak 1337 (+126288)	peak 1336 (+191475)
Ofcc1	2	peak 2220 (-431693)	peak 2219 (-119048)
Oit1	2	peak 2340 (-28594)	peak 2339 (+16063)
Olfm1	2	peak 271 (-92343)	peak 272 (+62051)
Olfm3	2	peak 581 (-506134)	peak 582 (+473157)
Olfm4	2	peak 2408 (+87457)	peak 2409 (+97808)
Oma1	2	peak 742 (+462051)	peak 743 (+895364)
Opa1	2	peak 2627 (+239487)	peak 2628 (+243666)
Oxgr1	2	peak 2450 (-95523)	peak 2449 (+146083)
P2ry1	2	peak 503 (-420065)	peak 504 (-385027)
Pabpc4l	2	peak 470 (-581044)	peak 469 (-108862)
Pappa	2	peak 694 (+8921)	peak 695 (+22932)
Pard3	2	peak 1543 (+59828)	peak 1544 (+193507)
Pard3b	2	peak 59 (-543059)	peak 60 (+952190)
Parm1	2	peak 913 (-41651)	peak 914 (+2108)
Parp1	2	peak 197 (-32237)	peak 198 (+7058)
Pbx1	2	peak 176 (-306318)	peak 175 (+186000)
Pcdh1	2	peak 2872 (+9557)	peak 2871 (+53456)
Pclo	2	peak 838 (-424889)	peak 839 (+218993)
Pde8b	2	peak 2296 (+131323)	peak 2295 (+202567)
Pdlim5	2	peak 623 (+138556)	peak 622 (+353396)
Pebp4	2	peak 2398 (+145427)	peak 2399 (+227585)
Penk	2	peak 653 (-535136)	peak 652 (-87445)
Pgpep1l	2	peak 1253 (+202601)	peak 1252 (+306233)
Phactr1	2	peak 2224 (-353595)	peak 2225 (+448941)
Phc2	2	peak 770 (+61101)	peak 771 (+82702)
Phf20	2	peak 416 (+21974)	peak 417 (+37110)
Phlda1	2	peak 1831 (+136722)	peak 1832 (+297353)
Piezo1	2	peak 1482 (+14092)	peak 1481 (+24980)
Pigm	2	peak 187 (+54733)	peak 188 (+60444)
Pik3r1	2	peak 2303 (-753545)	peak 2302 (+752593)
Pitpnb	2	peak 941 (-381852)	peak 942 (-175163)
Pitpnc1	2	peak 2002 (+15257)	peak 2001 (+218507)
Pitx2	2	peak 600 (-81913)	peak 601 (+122)
Pkn2	2	peak 625 (-941010)	peak 624 (-135677)
Pla2r1	2	peak 312 (+8686)	peak 311 (+83994)
Plppr1	2	peak 681 (-85971)	peak 682 (+136293)
Pmp22	2	peak 1930 (+649839)	peak 1931 (+731770)
Pou3f2	2	peak 665 (-968430)	peak 664 (-458647)
Pou3f3	2	peak 40 (-668974)	peak 41 (-570154)
Ppargc1a	2	peak 877 (+231110)	peak 876 (+281964)
Ppargc1b	2	peak 2898 (-52339)	peak 2897 (+23777)
Pphln1	2	peak 2572 (+70497)	peak 2573 (+78530)
Prag1	2	peak 1402 (-14634)	peak 1403 (-720)
Prkcb	2	peak 1316 (+269984)	peak 1317 (+316559)
Prkg2	2	peak 923 (-35755)	peak 922 (+77987)
Prl5a1	2	peak 2194 (+509952)	peak 2195 (+516458)
Psapl1	2	peak 861 (+26282)	peak 862 (+181309)
Ptbp2	2	peak 587 (+742928)	peak 586 (+979034)
Ptch2	2	peak 754 (+2514)	peak 755 (+9395)
Ptpn1	2	peak 428 (-92890)	peak 429 (-82198)
Ptprc	2	peak 134 (+357331)	peak 133 (+696623)
Ptprf	2	peak 759 (+14303)	peak 758 (+19298)
Rab38	2	peak 1276 (+192516)	peak 1277 (+511242)
Rab3c	2	peak 2317 (+928631)	peak 2316 (+980512)
Rad23b	2	peak 684 (-373978)	peak 685 (-370084)
Ralgps2	2	peak 161 (-140370)	peak 160 (+21630)
Rap2a	2	peak 2451 (-159830)	peak 2452 (+99895)
Rapgef2	2	peak 518 (-362682)	peak 517 (+768202)
Rarb	2	peak 2344 (-601424)	peak 2343 (-22700)
Rasa3	2	peak 1371 (+53850)	peak 1370 (+98999)
Rassf10	2	peak 1302 (-190837)	peak 1303 (-147882)
Rbm8a	2	peak 556 (-8848)	peak 557 (-8419)
Rbms3	2	peak 1717 (+432160)	peak 1716 (+541321)
Rbpms	2	peak 1400 (-34456)	peak 1399 (+6789)
Rdx	2	peak 1619 (-52609)	peak 1620 (-3188)
Rec114	2	peak 1626 (-48837)	peak 1625 (+30701)
Reep3	2	peak 1778 (+649956)	peak 1777 (+656806)
Rere	2	peak 807 (+57470)	peak 808 (+85214)
Rev3l	2	peak 1758 (-71998)	peak 1759 (-50969)
Rgmb	2	peak 2744 (-245340)	peak 2743 (-110035)
Rngtt	2	peak 671 (+279008)	peak 672 (+423565)
Robo1	2	peak 2681 (-228258)	peak 2682 (-27024)
Rpl10l	2	peak 2091 (-97828)	peak 2090 (+934748)
Rpl14	2	peak 1719 (+32697)	peak 1720 (+161441)
Rplp1	2	peak 1634 (+233621)	peak 1633 (+298898)
Rrp15	2	peak 209 (-139989)	peak 208 (-59293)
Rxfp2	2	peak 988 (-305033)	peak 989 (+140631)
Rxra	2	peak 269 (+26297)	peak 270 (+67913)
Samd5	2	peak 1731 (-44910)	peak 1730 (+546625)
Saxo1	2	peak 716 (+54093)	peak 715 (+321159)
Scnn1b	2	peak 1313 (-127063)	peak 1314 (+71931)
Sdc1	2	peak 2029 (+106246)	peak 2030 (+117575)
Sdk2	2	peak 2013 (+254940)	peak 2012 (+299826)
Sema4a	2	peak 539 (-32863)	peak 538 (-17474)
Sema4c	2	peak 35 (-86566)	peak 34 (+1737)
Sema6a	2	peak 2880 (-302586)	peak 2879 (-200575)
Senp2	2	peak 2614 (+98337)	peak 2615 (+99774)
Serbp1	2	peak 1084 (-131579)	peak 1085 (-37842)
Sfmbt2	2	peak 240 (-185639)	peak 241 (-184648)
Sgo2b	2	peak 1423 (-149784)	peak 1422 (+583464)
Sh3gl2	2	peak 713 (+613274)	peak 714 (+754645)
Sh3pxd2a	2	peak 2986 (-23948)	peak 2985 (+104569)
Siah2	2	peak 498 (-61355)	peak 497 (-52210)
Sirt5	2	peak 2226 (-34484)	peak 2227 (-4849)
Sis	2	peak 513 (+141743)	peak 512 (+347912)
Slamf9	2	peak 187 (-44079)	peak 188 (-38368)
Slc10a6	2	peak 933 (+32584)	peak 932 (+91554)
Slc12a2	2	peak 2891 (-278067)	peak 2892 (+142403)
Slc22a22	2	peak 2528 (+337154)	peak 2527 (+771396)
Slc24a2	2	peak 718 (-754665)	peak 717 (-476665)
Slc25a24	2	peak 578 (+133944)	peak 579 (+188393)
Slc25a37	2	peak 2396 (-8979)	peak 2395 (-5)
Slc2a1	2	peak 760 (-89516)	peak 761 (-35788)
Slc38a10	2	peak 2019 (-24732)	peak 2018 (-10042)
Slc38a8	2	peak 1475 (-47319)	peak 1474 (-44204)
Slc45a1	2	peak 808 (+285314)	peak 807 (+313058)
Slc5a3	2	peak 2707 (+36262)	peak 2708 (+40598)
Slco3a1	2	peak 1261 (-413041)	peak 1260 (+213136)
Slitrk6	2	peak 2443 (+255856)	peak 2442 (+511404)
Smad3	2	peak 1639 (-138601)	peak 1638 (-1399)
Smim15	2	peak 2310 (-185184)	peak 2311 (-110790)
Smug1	2	peak 2597 (+83103)	peak 2596 (+115866)
Sncaip	2	peak 2885 (+56573)	peak 2886 (+157173)
Snx2	2	peak 2885 (-352082)	peak 2886 (-251482)
Socs7	2	peak 1979 (+1260)	peak 1980 (+68949)
Sod3	2	peak 878 (+40725)	peak 879 (+85445)
Sorcs2	2	peak 862 (+12794)	peak 861 (+167821)
Sorl1	2	peak 1606 (+697280)	peak 1605 (+821668)
Sostdc1	2	peak 2052 (-497)	peak 2053 (+41960)
Sox4	2	peak 2195 (+294771)	peak 2194 (+301277)
Sox5	2	peak 1206 (-397812)	peak 1205 (-333938)
Spdye4c	2	peak 391 (-207669)	peak 392 (-26376)
Spef2	2	peak 2473 (-285206)	peak 2472 (-265372)
Spock1	2	peak 2250 (-158520)	peak 2249 (+110097)
Spock3	2	peak 1421 (-651674)	peak 1422 (+417345)
Spred2	2	peak 1883 (-775023)	peak 1884 (-320013)
Sptlc2	2	peak 2116 (+58567)	peak 2115 (+81815)
Src	2	peak 419 (-39255)	peak 420 (+63878)
Srebf1	2	peak 1929 (-42720)	peak 1928 (+35890)
Srgap1	2	peak 1850 (+91401)	peak 1849 (+217957)
Ssbp3	2	peak 749 (-41894)	peak 750 (+69460)
Ssh2	2	peak 1948 (-153793)	peak 1949 (+54386)
St6gal2	2	peak 2773 (-912)	peak 2774 (+9186)
Stard13	2	peak 995 (+40507)	peak 994 (+193643)
Stard3nl	2	peak 2172 (+49334)	peak 2171 (+217805)
Stat1	2	peak 52 (+41981)	peak 53 (+50495)
Stim2	2	peak 881 (-74954)	peak 882 (+292145)
Stoml3	2	peak 489 (+110701)	peak 490 (+134668)
Stt3b	2	peak 1713 (-465465)	peak 1712 (+162490)
Stxbp6	2	peak 2067 (-156664)	peak 2066 (-62993)
Suclg2	2	peak 1121 (+4932)	peak 1120 (+24810)
Syk	2	peak 2238 (-40862)	peak 2239 (+182778)
Syn3	2	peak 1803 (+154796)	peak 1802 (+157734)
Sytl3	2	peak 2715 (+4669)	peak 2716 (+77950)
Tab2	2	peak 1729 (-229740)	peak 1728 (-62276)
Tac4	2	peak 1976 (-79354)	peak 1977 (-35908)
Taf4b	2	peak 2844 (+61807)	peak 2845 (+231912)
Tagap	2	peak 2721 (-104746)	peak 2722 (-75503)
Tango6	2	peak 1465 (-63362)	peak 1466 (+86243)
Tbc1d1	2	peak 889 (+282322)	peak 890 (+377531)
Tbc1d22a	2	peak 2564 (-19275)	peak 2565 (+818148)
Tbck	2	peak 608 (+169636)	peak 609 (+225779)
Tcf7l1	2	peak 1090 (+25071)	peak 1089 (+64778)
Tcf7l2	2	peak 2999 (-283665)	peak 3000 (+491936)
Tcp10c	2	peak 2729 (-48461)	peak 2730 (+197291)
Tead1	2	peak 1302 (+83805)	peak 1303 (+126760)
Tfap2a	2	peak 2220 (+14119)	peak 2219 (+326764)
Tfcp2l1	2	peak 111 (+312258)	peak 112 (+422568)
Tgoln1	2	peak 1090 (-146881)	peak 1089 (-107174)
Thada	2	peak 2814 (-29579)	peak 2813 (+153025)
Thsd7b	2	peak 121 (-623631)	peak 122 (-359489)
Tiam1	2	peak 2704 (-176307)	peak 2703 (+66349)
Timp3	2	peak 1802 (+40750)	peak 1803 (+43688)
Tjap1	2	peak 2768 (+5279)	peak 2767 (+16668)
Tln2	2	peak 1648 (-48165)	peak 1647 (-13601)
Tlr2	2	peak 530 (-181027)	peak 529 (-34709)
Tm2d1	2	peak 737 (+277093)	peak 736 (+307610)
Tmc3	2	peak 1271 (-360671)	peak 1272 (-196549)
Tmco1	2	peak 173 (-12266)	peak 174 (+31942)
Tmco5	2	peak 375 (-229709)	peak 376 (+201174)
Tmem108	2	peak 1697 (-240066)	peak 1696 (+107662)
Tmem131l	2	peak 530 (+17381)	peak 529 (+163699)
Tmem135	2	peak 1277 (+397272)	peak 1276 (+715998)
Tmem144	2	peak 520 (-36669)	peak 519 (+99830)
Tmem178	2	peak 2804 (-57292)	peak 2805 (+25197)
Tmem179	2	peak 2150 (-48943)	peak 2149 (+328626)
Tmem184b	2	peak 2548 (-22564)	peak 2547 (+11631)
Tmem196	2	peak 2153 (-369531)	peak 2154 (+82432)
Tmem232	2	peak 2784 (+587581)	peak 2783 (+667078)
Tmem44	2	peak 2631 (+37624)	peak 2630 (+92111)
Tmem45b	2	peak 1598 (-250073)	peak 1597 (-130752)
Tmtc2	2	peak 1827 (-226754)	peak 1826 (+99927)
Tmtc4	2	peak 2456 (-609716)	peak 2455 (-583427)
Tnfrsf11b	2	peak 2525 (-75525)	peak 2524 (+25496)
Traf3ip2	2	peak 1758 (+47186)	peak 1759 (+68215)
Trat1	2	peak 2654 (+10750)	peak 2653 (+146270)
Trib2	2	peak 2033 (-204785)	peak 2032 (+185758)
Trim2	2	peak 532 (-74084)	peak 531 (-62877)
Trim29	2	peak 1608 (+7969)	peak 1609 (+8530)
Trio	2	peak 2490 (+98782)	peak 2489 (+272850)
Trpc4	2	peak 492 (-12888)	peak 493 (-4055)
Tshz1	2	peak 2924 (+463694)	peak 2923 (+594388)
Tspan2	2	peak 568 (-262488)	peak 569 (-227087)
Ttc28	2	peak 941 (+69152)	peak 942 (+275841)
Ttll11	2	peak 283 (-24510)	peak 282 (+316830)
Txnl1	2	peak 2902 (+198394)	peak 2901 (+288204)
Ube2e2	2	peak 2346 (-523908)	peak 2345 (+227195)
Ube2e3	2	peak 335 (-624026)	peak 336 (-388925)
Ubl3	2	peak 985 (-364246)	peak 984 (+2172)
Ubp1	2	peak 1710 (+16494)	peak 1711 (+34782)
Uhrf1bp1l	2	peak 1805 (+163038)	peak 1806 (+561329)
Umps	2	peak 2635 (+59149)	peak 2634 (+95385)
Unc5cl	2	peak 2771 (+13525)	peak 2772 (+367380)
Ush2a	2	peak 211 (+397546)	peak 212 (+657032)
Ust	2	peak 1729 (+332855)	peak 1728 (+500319)
Vcam1	2	peak 584 (-61202)	peak 583 (+104682)
Vcan	2	peak 2290 (-80785)	peak 2289 (+194808)
Wac	2	peak 2833 (+884941)	peak 2834 (+968372)
Wdr11	2	peak 1323 (+383146)	peak 1324 (+395027)
Wdr20rt	2	peak 2089 (+18213)	peak 2090 (+124136)
Wdr37	2	peak 2161 (+86522)	peak 2160 (+258532)
Wdr41	2	peak 2295 (+44151)	peak 2296 (+115395)
Wnt10a	2	peak 72 (-10328)	peak 73 (+3136)
Wnt4	2	peak 783 (-179618)	peak 784 (-97702)
Wnt5a	2	peak 2360 (+375078)	peak 2361 (+468127)
Xylt1	2	peak 1309 (-706395)	peak 1310 (-702859)
Zbtb40	2	peak 784 (-131092)	peak 783 (-49176)
Zfhx3	2	peak 1467 (+44190)	peak 1468 (+464664)
Zfp395	2	peak 2392 (-14697)	peak 2393 (-6754)
Zfp516	2	peak 2923 (+581137)	peak 2924 (+711831)
Zfp600	2	peak 800 (+82888)	peak 801 (+113586)
Zfp648	2	peak 155 (-87735)	peak 156 (+395248)
Zfp770	2	peak 362 (-410305)	peak 361 (-389138)
Zfp825	2	peak 2280 (-36151)	peak 2279 (-34950)
Zfp980	2	peak 798 (+74729)	peak 799 (+110883)
Zfp987	2	peak 798 (-351931)	peak 799 (-315777)
Zfp992	2	peak 800 (-209311)	peak 801 (-178613)
Zfp993	2	peak 802 (-30617)	peak 803 (+54)
Zfpm1	2	peak 1479 (-310983)	peak 1480 (-217620)
Zfpm2	2	peak 2501 (-360587)	peak 2502 (+636149)
Zhx2	2	peak 2529 (+144032)	peak 2530 (+169228)
peak 1	1	peak 1623 (+194305)
0610040J01Rik	1	peak 888 (-63412)
1110004F10Rik	1	peak 1307 (+185144)
1700008P02Rik	1	peak 442 (+759851)
1700009N14Rik	1	peak 676 (+655161)
1700011I03Rik	1	peak 2891 (+66831)
1700020N01Rik	1	peak 1748 (+254370)
1700021F07Rik	1	peak 434 (-214815)
1700024P04Rik	1	peak 2299 (-40605)
1700028P14Rik	1	peak 2948 (-15612)
1700066M21Rik	1	peak 56 (-300735)
1700086D15Rik	1	peak 1933 (+109656)
1700123L14Rik	1	peak 1122 (-743544)
1700129C05Rik	1	peak 2384 (+557942)
1810011O10Rik	1	peak 1389 (+432565)
2010005H15Rik	1	peak 2639 (-8710)
2010107E04Rik	1	peak 2147 (+38207)
2010315B03Rik	1	peak 1724 (+55021)
2210408I21Rik	1	peak 2285 (+303435)
2300009A05Rik	1	peak 1637 (-108994)
4930444P10Rik	1	peak 5 (+69234)
4930447C04Rik	1	peak 2096 (-13130)
4930455H04Rik	1	peak 585 (+523)
4930474N05Rik	1	peak 2365 (+861054)
4930504O13Rik	1	peak 1924 (+5886)
4930522L14Rik	1	peak 939 (-293)
4930523C07Rik	1	peak 163 (-335544)
4930524J08Rik	1	peak 928 (-3192)
4930558K02Rik	1	peak 165 (-263836)
4930564D02Rik	1	peak 573 (+148999)
4930595D18Rik	1	peak 2145 (-41228)
4932414N04Rik	1	peak 321 (+148132)
4933412E24Rik	1	peak 2532 (+119620)
4933415A04Rik	1	peak 1912 (-49473)
4933416C03Rik	1	peak 1835 (-138172)
5330417C22Rik	1	peak 577 (+54392)
5430403G16Rik	1	peak 938 (+94)
5830473C10Rik	1	peak 910 (+18687)
5930422O12Rik	1	peak 1398 (+127453)
6030452D12Rik	1	peak 1462 (-30841)
6030458C11Rik	1	peak 2481 (+202203)
7420426K07Rik	1	peak 1686 (+41856)
9130011E15Rik	1	peak 2982 (+138211)
9230110C19Rik	1	peak 1572 (+9754)
9330182O14Rik	1	peak 2501 (+152267)
9530002B09Rik	1	peak 765 (-566345)
9530053A07Rik	1	peak 1224 (-45236)
9530068E07Rik	1	peak 1921 (+130739)
9630041A04Rik	1	peak 1691 (-672679)
A230072I06Rik	1	peak 1369 (-305092)
A26c2	1	peak 1246 (-234417)
A930009A15Rik	1	peak 1833 (-113810)
A930017K11Rik	1	peak 2747 (-27421)
Aatk	1	peak 2017 (+80572)
Abca12	1	peak 69 (-109663)
Abca13	1	peak 1873 (-547)
Abcb7	1	peak 3023 (+9195)
Abcc12	1	peak 1443 (+720581)
Abcc2	1	peak 2976 (+108536)
Abcd3	1	peak 588 (-82998)
Abcg1	1	peak 2754 (+31053)
Abcg2	1	peak 1079 (-900)
Ablim1	1	peak 3004 (-56755)
Acaa2	1	peak 2911 (-239821)
Acadl	1	peak 63 (+17420)
Acan	1	peak 1262 (-31797)
Acnat2	1	peak 682 (+212576)
Aco1	1	peak 676 (-37625)
Acot11	1	peak 749 (-64578)
Acp6	1	peak 558 (-70590)
Actbl2	1	peak 2318 (-422345)
Actl6a	1	peak 457 (-87)
Actn1	1	peak 2105 (+93407)
Adam22	1	peak 825 (+285670)
Adam30	1	peak 560 (-106917)
Adamts17	1	peak 1251 (+303076)
Adamts19	1	peak 2893 (+198998)
Adamts20	1	peak 2574 (+611603)
Adamts5	1	peak 2695 (-3929)
Adamts6	1	peak 2308 (+448548)
Adamtsl3	1	peak 1269 (+108495)
Adamtsl4	1	peak 551 (+338)
Adar	1	peak 544 (-171349)
Adcy1	1	peak 1868 (+112179)
Adcy7	1	peak 1445 (-48012)
Adcy8	1	peak 2538 (+309054)
Adgb	1	peak 1732 (-114622)
Adgra2	1	peak 1396 (-38953)
Adgrg1	1	peak 1458 (+14155)
Adgrg3	1	peak 1458 (-26430)
Adgrl1	1	peak 1442 (-143211)
Adgrv1	1	peak 2286 (+664642)
Adh6a	1	peak 620 (-9383)
Adh6b	1	peak 621 (-204)
Adh7	1	peak 619 (+54156)
Adi1	1	peak 2044 (-7655)
Adipor2	1	peak 1178 (-34514)
Adm	1	peak 1293 (+112755)
Adnp2	1	peak 2919 (+47461)
Adora2a	1	peak 1786 (-87024)
Adra2a	1	peak 2997 (+676997)
Adsl	1	peak 2553 (-139283)
Adss	1	peak 193 (-186895)
Afdn	1	peak 2730 (-208685)
Aff1	1	peak 934 (+69354)
Aftph	1	peak 1886 (+16372)
Aga	1	peak 1411 (-64745)
Agbl4	1	peak 752 (+151648)
Agfg2	1	peak 970 (-22339)
Ago2	1	peak 2544 (-49854)
Agpat5	1	peak 1374 (-29850)
Agps	1	peak 331 (-6377)
Agr3	1	peak 2051 (-357218)
Agtr1b	1	peak 447 (-464040)
Ahctf1	1	peak 196 (-84471)
Ahcy	1	peak 414 (+55076)
Ahcyl1	1	peak 575 (-18383)
Ahcyl2	1	peak 1028 (-20230)
Ahi1	1	peak 1747 (+178632)
Ahnak	1	peak 2936 (+44157)
Ahnak2	1	peak 2151 (-12283)
Ahr	1	peak 2051 (-33364)
Aipl1	1	peak 1944 (+72613)
Ajuba	1	peak 2374 (+3171)
Ak4	1	peak 739 (-148692)
Akap1	1	peak 1972 (+93841)
Akap6	1	peak 2076 (+50852)
Akirin2	1	peak 673 (-449556)
Akr1d1	1	peak 1037 (+91533)
Akt3	1	peak 192 (+322172)
Aktip	1	peak 1446 (-170660)
Aldh9a1	1	peak 174 (-9671)
Alg10b	1	peak 2567 (+110352)
Alkal1	1	peak 1 (-96742)
Alkbh8	1	peak 1564 (-76635)
Alppl2	1	peak 90 (+256540)
Alx4	1	peak 348 (+7290)
Amacr	1	peak 2476 (-11938)
Amfr	1	peak 1455 (+72121)
Amigo2	1	peak 2576 (-294049)
Ammecr1	1	peak 3031 (+261175)
Amn	1	peak 2145 (-45376)
Amotl2	1	peak 1693 (+100792)
Ampd1	1	peak 570 (+23602)
Ampd3	1	peak 1293 (-32188)
Anapc10	1	peak 1435 (+295224)
Angpt2	1	peak 1374 (-74865)
Angptl1	1	peak 160 (+79195)
Ank	1	peak 2488 (-292279)
Ankfn1	1	peak 1973 (+78675)
Ankk1	1	peak 1618 (-57526)
Ankrd29	1	peak 2842 (+7439)
Ankrd33b	1	peak 2494 (+2154)
Ankrd36	1	peak 1866 (+1340)
Ankrd39	1	peak 34 (-8344)
Ankrd6	1	peak 670 (+68238)
Ankrd63	1	peak 381 (+34516)
Ankrd7	1	peak 1019 (+590895)
Ankrd9	1	peak 2144 (+40230)
Ano2	1	peak 1184 (+452496)
Ano3	1	peak 359 (+134033)
Ano4	1	peak 1804 (-138580)
Anxa10	1	peak 1421 (-176571)
Anxa2	1	peak 1650 (-13437)
Aoah	1	peak 2174 (-669121)
Ap1ar	1	peak 599 (+31013)
Ap3b1	1	peak 2294 (-36329)
Ap4e1	1	peak 388 (-15970)
Apba1	1	peak 2949 (+26663)
Apbb2	1	peak 891 (+32230)
Apc	1	peak 2867 (-157265)
Api5	1	peak 349 (-481513)
Arf1	1	peak 1925 (-56280)
Arf3	1	peak 2578 (-12553)
Arhgap11a	1	peak 360 (-21222)
Arhgap12	1	peak 2830 (+74667)
Arhgap15	1	peak 287 (+884162)
Arhgap19	1	peak 2972 (+35186)
Arhgap24	1	peak 929 (+13603)
Arhgap28	1	peak 2786 (+298580)
Arhgap32	1	peak 1599 (-104492)
Arhgap5	1	peak 2075 (-307420)
Arhgap6	1	peak 3040 (-93313)
Arhgdib	1	peak 1200 (+10923)
Arhgef1	1	peak 1222 (+4658)
Arhgef10l	1	peak 791 (+116437)
Arhgef18	1	peak 1353 (+16424)
Arhgef25	1	peak 1858 (-2841)
Arhgef28	1	peak 2298 (+323509)
Arhgef37	1	peak 2898 (+83766)
Arid1b	1	peak 2713 (+265567)
Arid4b	1	peak 2166 (+213717)
Arid5b	1	peak 1779 (+168255)
Arl5a	1	peak 305 (-207429)
Armc1	1	peak 446 (+784347)
Armc2	1	peak 1761 (+55392)
Armc4	1	peak 2832 (-311432)
Armc9	1	peak 87 (+63367)
Arntl	1	peak 1304 (-2519)
Arpp19	1	peak 1656 (-737)
Arrb2	1	peak 1943 (+5892)
Arrdc3	1	peak 2286 (+85102)
Arsj	1	peak 596 (+170954)
Artn	1	peak 757 (-99534)
Asap2	1	peak 2036 (-121390)
Asb13	1	peak 2155 (-3354)
Asb17	1	peak 647 (-111141)
Asb4	1	peak 1000 (-1270)
Ascc3	1	peak 1764 (-13064)
Aspg	1	peak 2148 (+26810)
Astl	1	peak 389 (+601)
Astn1	1	peak 162 (+305671)
Astn2	1	peak 696 (+766144)
Atf3	1	peak 214 (-9121)
Atic	1	peak 69 (-32577)
Atoh1	1	peak 1081 (-134530)
Atp11b	1	peak 459 (-779542)
Atp2b1	1	peak 1819 (-435104)
Atp2b4	1	peak 129 (-43857)
Atp5a1	1	peak 2918 (+15513)
Atp6v1c1	1	peak 2500 (+253613)
Atp6v1c2	1	peak 2035 (+10707)
Atp6v1g3	1	peak 135 (+88892)
Atp8a1	1	peak 893 (-16909)
Atpif1	1	peak 774 (+667)
Atxn1	1	peak 2233 (-158675)
AU040320	1	peak 768 (+34190)
Auh	1	peak 2239 (+163710)
Aurkc	1	peak 1214 (-58189)
Auts2	1	peak 963 (-81116)
AV320801	1	peak 3026 (+80608)
Avpr1a	1	peak 1851 (+201291)
Avpr1b	1	peak 125 (+25331)
AY761185	1	peak 1386 (-49524)
Azin1	1	peak 2499 (+143647)
B020004J07Rik	1	peak 741 (+9485)
B230307C23Rik	1	peak 2712 (+110321)
B3galnt1	1	peak 511 (-63128)
B3galnt2	1	peak 2165 (+14560)
B3galt2	1	peak 142 (-145768)
B3galt6	1	peak 819 (-143)
B3gat2	1	peak 27 (+130340)
B3glct	1	peak 988 (+35412)
B3gnt7	1	peak 87 (-85069)
B3gntl1	1	peak 2020 (+128185)
B430305J03Rik	1	peak 505 (+2705)
B4galnt2	1	peak 1978 (-78574)
B4galnt3	1	peak 1179 (+141258)
B4galt6	1	peak 2854 (-141663)
Baalc	1	peak 2500 (-17625)
Bach2	1	peak 668 (+138847)
Baiap2	1	peak 2017 (+23735)
Bak1	1	peak 2748 (-6757)
Bard1	1	peak 68 (-90)
Bbip1	1	peak 2996 (+49742)
Bbs10	1	peak 1830 (-55820)
Bbs9	1	peak 1588 (+279894)
BC030870	1	peak 1424 (-242269)
BC034090	1	peak 158 (-15460)
BC049762	1	peak 1919 (+13865)
BC117090	1	peak 2640 (-2983)
Bcar3	1	peak 592 (-38969)
Bcas1	1	peak 430 (+232230)
Bckdhb	1	peak 1674 (+748338)
Bcl10	1	peak 630 (-143217)
Bcl6	1	peak 2617 (-68370)
Bcl7c	1	peak 1322 (+16989)
Bcl9l	1	peak 1611 (+69110)
Bclaf1	1	peak 1746 (-126997)
Bdh2	1	peak 612 (+12706)
Bend3	1	peak 1762 (-39195)
Bend5	1	peak 752 (-865567)
Bet1	1	peak 998 (-189861)
Bicc1	1	peak 1784 (+516384)
Bin1	1	peak 2858 (+16337)
Birc2	1	peak 1571 (+52293)
Bloc1s5	1	peak 2209 (+40510)
Bloc1s6	1	peak 385 (-17712)
Bmp3	1	peak 922 (+104913)
Bmp5	1	peak 1657 (+57358)
Bnip2	1	peak 1651 (-172809)
Bnip3	1	peak 1347 (-4589)
Boc	1	peak 2649 (+7875)
Bola3	1	peak 1098 (+83689)
Bri3	1	peak 982 (-15921)
Brk1	1	peak 1140 (+7617)
Brms1l	1	peak 2083 (+228069)
Brpf1	1	peak 1138 (-17733)
Btbd35f7	1	peak 3010 (+237593)
Btbd7	1	peak 2127 (+97152)
Btbd9	1	peak 2753 (+530938)
Btc	1	peak 913 (-72970)
C030005K15Rik	1	peak 1819 (-753293)
C130060K24Rik	1	peak 1083 (+141076)
C1qtnf1	1	peak 2016 (+14429)
C1qtnf3	1	peak 2476 (+17461)
C330021F23Rik	1	peak 1354 (+11633)
C530025M09Rik	1	peak 410 (-301749)
C7	1	peak 2466 (-25264)
C77370	1	peak 3023 (-203534)
Cab39l	1	peak 2385 (+92158)
Cachd1	1	peak 738 (+52243)
Cacna2d3	1	peak 2362 (+356512)
Cacnb4	1	peak 305 (+44501)
Cacng1	1	peak 2003 (+10585)
Cacng4	1	peak 2004 (-13095)
Cacng5	1	peak 2004 (+107403)
Cadm1	1	peak 1616 (-168619)
Cadm2	1	peak 2680 (+988048)
Cadm3	1	peak 190 (-51367)
Calcoco1	1	peak 2593 (-44880)
Calcrl	1	peak 342 (+350204)
Calm2	1	peak 2821 (-54838)
Camkk2	1	peak 955 (+46024)
Camkmt	1	peak 2815 (+168468)
Camsap3	1	peak 1354 (-8181)
Cand1	1	peak 1840 (-404393)
Cap2	1	peak 2234 (-14466)
Capn12	1	peak 1226 (+28141)
Capn15	1	peak 2747 (+5810)
Capn6	1	peak 3033 (-10439)
Capzb	1	peak 789 (+46474)
Car15	1	peak 2610 (-27713)
Car8	1	peak 654 (+124249)
Card6	1	peak 2466 (+19502)
Carf	1	peak 57 (+104308)
Carm1	1	peak 1586 (-676)
Carmil1	1	peak 2192 (+89927)
Casp3	1	peak 1407 (+84575)
Casp7	1	peak 3001 (+22563)
Casr	1	peak 2641 (+100614)
Cav1	1	peak 1016 (+34547)
Cav2	1	peak 1015 (-86616)
Cavin4	1	peak 681 (+309797)
Cblb	1	peak 2655 (+25785)
Cbln1	1	peak 1444 (+235281)
Cbln4	1	peak 431 (+602471)
Ccdc126	1	peak 1065 (+2918)
Ccdc129	1	peak 1078 (-62183)
Ccdc15	1	peak 1603 (-11480)
Ccdc158	1	peak 915 (+13049)
Ccdc160	1	peak 3018 (-1686)
Ccdc171	1	peak 712 (+26935)
Ccdc181	1	peak 169 (-1819)
Ccdc186	1	peak 3003 (+14926)
Ccdc187	1	peak 263 (+41516)
Ccdc188	1	peak 2611 (-41572)
Ccdc28a	1	peak 1743 (-136038)
Ccdc59	1	peak 1827 (-39878)
Ccdc60	1	peak 950 (-106219)
Ccdc8	1	peak 1216 (+32415)
Ccdc80	1	peak 2650 (-22004)
Ccdc83	1	peak 1279 (+58439)
Ccdc85c	1	peak 2140 (+55669)
Ccdc88b	1	peak 2933 (-34364)
Ccdc90b	1	peak 1281 (-40501)
Ccl17	1	peak 1457 (+10297)
Ccl21a	1	peak 680 (-61497)
Ccng2	1	peak 917 (+15413)
Ccnjl	1	peak 1912 (+8783)
Ccnk	1	peak 2140 (+40177)
Ccpg1	1	peak 1654 (+42071)
Ccr5	1	peak 1724 (+136132)
Ccser1	1	peak 1080 (+67287)
Ccser2	1	peak 2365 (+12716)
Cd163	1	peak 1182 (-48480)
Cd200r3	1	peak 2650 (+127930)
Cd209a	1	peak 1355 (-5458)
Cd209e	1	peak 1355 (+99867)
Cd247	1	peak 171 (+15948)
Cd28	1	peak 58 (+127029)
Cd34	1	peak 227 (-276609)
Cd5	1	peak 2938 (+48040)
Cd74	1	peak 2895 (+32043)
Cd82	1	peak 347 (+22411)
Cd9	1	peak 1183 (+72558)
Cd96	1	peak 2651 (-26941)
Cdadc1	1	peak 2385 (+64800)
Cdc42	1	peak 785 (-17872)
Cdc42bpa	1	peak 196 (-72434)
Cdc42bpg	1	peak 2932 (-28101)
Cdca4	1	peak 2151 (+14449)
Cdh1	1	peak 1465 (+16355)
Cdh10	1	peak 2485 (+154683)
Cdh13	1	peak 1473 (+544068)
Cdh18	1	peak 2486 (+117315)
Cdh26	1	peak 438 (+613659)
Cdh4	1	peak 438 (-398165)
Cdh6	1	peak 2482 (-796461)
Cdh7	1	peak 108 (+723586)
Cdh8	1	peak 1460 (+586046)
Cdk13	1	peak 2170 (-126097)
Cdk14	1	peak 824 (+338519)
Cdk19	1	peak 1760 (+67807)
Cdk5r2	1	peak 73 (-60282)
Cdk5rap2	1	peak 699 (+856497)
Cdk6	1	peak 821 (-6551)
Cdk8	1	peak 983 (+29891)
Cdv3	1	peak 1695 (-77672)
Ceacam10	1	peak 1221 (+73124)
Cela3a	1	peak 785 (+34199)
Celf6	1	peak 1627 (-12172)
Celsr1	1	peak 2562 (-4265)
Cep164	1	peak 1613 (+62421)
Cep41	1	peak 1030 (+25984)
Cep68	1	peak 1885 (+6017)
Cep72	1	peak 2278 (+24191)
Cep78	1	peak 2942 (+38152)
Cep83	1	peak 1813 (+251631)
Cers4	1	peak 1357 (+93510)
Ces1h	1	peak 1454 (-113606)
Ces5a	1	peak 1454 (+42376)
Cfap100	1	peak 1105 (+46893)
Cfap206	1	peak 674 (+5663)
Cfap44	1	peak 2649 (+156223)
Cfap53	1	peak 2910 (+4928)
Cfap58	1	peak 2988 (-36884)
Chd6	1	peak 426 (-2719)
Chd7	1	peak 655 (+205954)
Chga	1	peak 2126 (+99162)
Chic2	1	peak 899 (+78166)
Chil1	1	peak 130 (-68710)
Chit1	1	peak 130 (+2452)
Chka	1	peak 2929 (-12093)
Chmp2b	1	peak 2677 (+5487)
Chrdl1	1	peak 3032 (-88799)
Chrm1	1	peak 2935 (+46203)
Chrm2	1	peak 1034 (-583738)
Chrm3	1	peak 2164 (+526403)
Chrna7	1	peak 1246 (+154423)
Chst8	1	peak 1232 (+95024)
Chsy1	1	peak 1248 (+91586)
Chsy3	1	peak 2893 (-139639)
Cic	1	peak 1223 (+12112)
Cilp	1	peak 1641 (-33664)
Cirbp	1	peak 1792 (-16674)
Cisd2	1	peak 613 (+2964)
Cisd3	1	peak 1982 (-20837)
CK137956	1	peak 769 (+541012)
Ckap2l	1	peak 393 (+32889)
Ckap5	1	peak 345 (-63960)
Clca3b	1	peak 627 (-981)
Clcn3	1	peak 1415 (+86070)
Cldn1	1	peak 2625 (-1597)
Cldn17	1	peak 2699 (+81200)
Cldn23	1	peak 1402 (-253635)
Cldn34b4	1	peak 3020 (+205599)
Cldn34d	1	peak 3020 (+3975)
Clec16a	1	peak 2602 (+148282)
Clec2g	1	peak 1191 (+40696)
Clic5	1	peak 2765 (+352306)
Clic6	1	peak 2710 (+129483)
Cln6	1	peak 1635 (-20428)
Clstn2	1	peak 1684 (-10167)
Clvs1	1	peak 655 (-371998)
Clybl	1	peak 2454 (-5137)
Cmpk2	1	peak 2039 (+507681)
Cnbd1	1	peak 659 (+207719)
Cnga1	1	peak 894 (+2968)
Cnga4	1	peak 1289 (-3852)
Cngb1	1	peak 1459 (+65495)
Cnksr3	1	peak 1726 (+125970)
Cnot4	1	peak 1033 (+121515)
Cnot6l	1	peak 918 (-14687)
Cnpy1	1	peak 852 (+10335)
Cnst	1	peak 195 (+28035)
Cntn3	1	peak 1134 (-60466)
Cntn5	1	peak 1575 (-198890)
Cntn6	1	peak 1135 (-843749)
Cntnap2	1	peak 1041 (-267054)
Cntnap4	1	peak 1470 (+46333)
Cobl	1	peak 1877 (-59869)
Cog7	1	peak 1314 (+44742)
Col11a1	1	peak 581 (+544291)
Col17a1	1	peak 2987 (-6191)
Col18a1	1	peak 1789 (-101938)
Col1a2	1	peak 998 (-228660)
Col23a1	1	peak 1920 (+169998)
Col25a1	1	peak 603 (+263546)
Col27a1	1	peak 690 (+111858)
Col3a1	1	peak 43 (-595456)
Col4a1	1	peak 1368 (-30598)
Col4a2	1	peak 1367 (-48800)
Col6a4	1	peak 1701 (-3680)
Col6a6	1	peak 1700 (+162663)
Colec10	1	peak 2525 (-56765)
Colgalt1	1	peak 1430 (+16437)
Colgalt2	1	peak 152 (+21578)
Commd4	1	peak 1624 (-72250)
Commd9	1	peak 356 (+175405)
Comp	1	peak 1428 (+34942)
Comtd1	1	peak 2348 (-54946)
Copg1	1	peak 1102 (+10359)
Cops2	1	peak 387 (+49483)
Cops7b	1	peak 89 (+60658)
Coq9	1	peak 1457 (-17571)
Coro6	1	peak 1949 (-59743)
Cotl1	1	peak 1476 (+11131)
Cox4i2	1	peak 413 (-1355)
Cpa1	1	peak 1030 (+28547)
Cpeb2	1	peak 868 (-554564)
Cplx4	1	peak 2905 (-20790)
Cpn2	1	peak 2629 (+133239)
Cpne8	1	peak 2567 (+344769)
Cpne9	1	peak 1138 (+7152)
Cpq	1	peak 2497 (+283179)
Cpsf4l	1	peak 2011 (-27766)
Cr2	1	peak 228 (-195133)
Crabp1	1	peak 1622 (+36910)
Crb2	1	peak 284 (+368357)
Creb3l1	1	peak 346 (+58711)
Creb5	1	peak 1076 (+142246)
Crebl2	1	peak 1193 (-12759)
Crisp4	1	peak 10 (+395503)
Crispld1	1	peak 10 (+23311)
Crlf3	1	peak 1954 (+31869)
Crnkl1	1	peak 403 (-131345)
Crot	1	peak 826 (-46447)
Crp	1	peak 189 (-17094)
Crtam	1	peak 1604 (-27208)
Crtc1	1	peak 1428 (+31079)
Cry1	1	peak 1801 (+44155)
Crybg3	1	peak 2669 (-10972)
Crygf	1	peak 62 (+344083)
Csf1	1	peak 575 (+45526)
Csgalnact1	1	peak 1425 (+240947)
Csnk1e	1	peak 2548 (+16132)
Csnka2ip	1	peak 2676 (+307468)
Cspg5	1	peak 1706 (+37531)
Csrp2	1	peak 1829 (-168530)
Cst10	1	peak 409 (+44577)
Cst13	1	peak 408 (+6402)
Cst9	1	peak 408 (-8664)
Ctage5	1	peak 2085 (-28091)
Ctdspl	1	peak 1718 (+84123)
Ctla4	1	peak 58 (-35638)
Ctnna1	1	peak 2868 (-72995)
Ctnna2	1	peak 1095 (+733172)
Ctnna3	1	peak 1776 (+241366)
Ctnnal1	1	peak 686 (+6269)
Ctnnd1	1	peak 343 (+15567)
Ctr9	1	peak 1294 (-5190)
Cts3	1	peak 2259 (-234195)
Ctse	1	peak 125 (-13736)
Ctsl	1	peak 2261 (-30295)
Cttnbp2	1	peak 1018 (-25301)
Cttnbp2nl	1	peak 572 (+58526)
Cuedc1	1	peak 1969 (+24066)
Cux2	1	peak 954 (+68161)
Cwc27	1	peak 2308 (+73915)
Cxcr5	1	peak 1611 (+5520)
Cycs	1	peak 1067 (+34446)
Cyp17a1	1	peak 2984 (+30564)
Cyp20a1	1	peak 57 (-133671)
Cyp26b1	1	peak 1099 (-387992)
Cyp2w1	1	peak 975 (+12208)
Cyp46a1	1	peak 2141 (+61943)
Cyp4f18	1	peak 1431 (+41363)
Cyp7b1	1	peak 446 (-135380)
Cypt4	1	peak 1590 (-39365)
Cytl1	1	peak 863 (+81799)
D330045A20Rik	1	peak 3028 (-109872)
D3Ertd751e	1	peak 468 (+795146)
D7Ertd443e	1	peak 1339 (-138069)
D830030K20Rik	1	peak 2334 (+28947)
Daam1	1	peak 2095 (-128883)
Dab2	1	peak 2467 (-939898)
Dab2ip	1	peak 282 (+40757)
Dach1	1	peak 2429 (-25512)
Dact1	1	peak 2095 (+392296)
Dact2	1	peak 2731 (-41277)
Dag1	1	peak 1704 (-8592)
Dbi	1	peak 114 (+15092)
Dcc	1	peak 2909 (+142733)
Dclk1	1	peak 495 (+294562)
Dclk2	1	peak 535 (+143277)
Dclk3	1	peak 1707 (+7920)
Dctn1	1	peak 1097 (+12566)
Dctn4	1	peak 2894 (-5991)
Dctn6	1	peak 1400 (+144275)
Dcun1d4	1	peak 897 (+22408)
Dcx	1	peak 3033 (+95458)
Ddi1	1	peak 1569 (-339261)
Ddx11	1	peak 2785 (+223111)
Ddx17	1	peak 2549 (+18000)
Ddx20	1	peak 574 (+45477)
Ddx39	1	peak 1442 (+41622)
Defa21	1	peak 1386 (-31311)
Defb11	1	peak 1387 (-144)
Defb7	1	peak 1375 (+187395)
Dennd1a	1	peak 284 (+142769)
Dennd2c	1	peak 570 (-29940)
Dennd4a	1	peak 1640 (-23009)
Dera	1	peak 1203 (-3861)
Des	1	peak 74 (-20644)
Desi2	1	peak 194 (+31)
Dgkz	1	peak 346 (-15364)
Dhdds	1	peak 776 (+17751)
Dhrs13	1	peak 1950 (-47247)
Dhrs7c	1	peak 1937 (+63113)
Dhx35	1	peak 424 (+651772)
Dhx40	1	peak 1961 (-182775)
Diaph1	1	peak 2870 (+58005)
Diaph2	1	peak 3024 (-675081)
Dio3	1	peak 2142 (-529224)
Dip2a	1	peak 1788 (+43651)
Dis3l2	1	peak 90 (+129552)
Disp1	1	peak 202 (+71587)
Dkk2	1	peak 607 (+332653)
Dkk3	1	peak 1301 (-54148)
Dkk4	1	peak 1388 (-6510)
Dld	1	peak 2048 (+79678)
Dlg2	1	peak 1280 (-442471)
Dmrt3	1	peak 2955 (-34885)
Dnah5	1	peak 2491 (+217899)
Dnah7b	1	peak 46 (+305185)
Dnah7c	1	peak 46 (-53669)
Dnah9	1	peak 1934 (-37038)
Dnajb1	1	peak 1440 (+13764)
Dnajc1	1	peak 255 (+78184)
Dnajc8	1	peak 774 (-2558)
Dnali1	1	peak 766 (+7619)
Dnlz	1	peak 265 (+9164)
Dnm3	1	peak 165 (+234562)
Dnmbp	1	peak 2976 (+49463)
Dnpep	1	peak 74 (-22026)
Dnttip2	1	peak 592 (+106421)
Dock11	1	peak 3013 (-10897)
Dock4	1	peak 2063 (+442373)
Dock9	1	peak 2453 (-14869)
Dok5	1	peak 431 (+709188)
Dok6	1	peak 2927 (-57576)
Dpm3	1	peak 541 (-1508)
Dpp10	1	peak 115 (-108940)
Dpp4	1	peak 313 (-68906)
Dppa3	1	peak 1181 (+24451)
Dpy19l1	1	peak 1590 (-82691)
Dpy19l4	1	peak 656 (-48718)
Dscaml1	1	peak 1613 (+335979)
Dsel	1	peak 109 (+167944)
Dsn1	1	peak 418 (-51452)
Dtl	1	peak 215 (+110599)
Dtna	1	peak 2855 (-324428)
Dtnbp1	1	peak 2231 (+132365)
Dtwd2	1	peak 2881 (+939404)
Duox1	1	peak 384 (+16772)
Duox2	1	peak 383 (+33247)
Dupd1	1	peak 2347 (+145477)
Dusp10	1	peak 205 (+670733)
Dusp16	1	peak 1193 (-24770)
Dusp23	1	peak 189 (-47999)
Dusp26	1	peak 1397 (-631090)
Dusp7	1	peak 1702 (+2701)
Dvl1	1	peak 818 (+7118)
Dynap	1	peak 2908 (+20160)
Dync1h1	1	peak 2143 (-102720)
Dync2h1	1	peak 1569 (+575339)
Dynll1	1	peak 949 (-16844)
Dynll2	1	peak 1968 (+21010)
Dynlt1a	1	peak 2714 (-89666)
Dynlt1b	1	peak 2714 (-22972)
E030025P04Rik	1	peak 2007 (+132489)
E2f2	1	peak 781 (-25466)
E2f7	1	peak 1829 (+5791)
E330021D16Rik	1	peak 1197 (+18163)
Eaf2	1	peak 2642 (+37946)
Ebag9	1	peak 2508 (-56175)
Ebf1	1	peak 1913 (+272502)
Ebf3	1	peak 1345 (+183970)
Ece1	1	peak 787 (+105037)
Edf1	1	peak 262 (+2637)
Edil3	1	peak 2288 (+522908)
Eef1akmt1	1	peak 2383 (-62073)
Eef2k	1	peak 1312 (+20949)
Eefsec	1	peak 1103 (-2722)
Efcab11	1	peak 2124 (+372366)
Efcab5	1	peak 1948 (-5521)
Efl1	1	peak 1270 (+122696)
Efna3	1	peak 543 (+35778)
Efs	1	peak 2375 (+142)
Egf	1	peak 602 (+56364)
Egln3	1	peak 2077 (+681015)
Ehbp1	1	peak 1891 (+91647)
Ehd1	1	peak 2932 (+1630)
Eif1	1	peak 1988 (-30672)
Eif2ak4	1	peak 380 (+66487)
Eif3k	1	peak 1227 (+9253)
Eif6	1	peak 415 (-6228)
Elk4	1	peak 127 (-5593)
Ell2	1	peak 2281 (-151472)
Elovl6	1	peak 602 (+166566)
Elp6	1	peak 1706 (-23859)
Emilin2	1	peak 2792 (-99696)
Eml1	1	peak 2141 (-26492)
Eml4	1	peak 2806 (+34236)
Emp1	1	peak 1196 (+296858)
Enah	1	peak 199 (+166501)
Engase	1	peak 2016 (-33901)
Eno4	1	peak 3008 (-58927)
Enox2	1	peak 3016 (+106843)
ENSMUSG00000109903	1	peak 840 (-154411)
ENSMUSG00000112187	1	peak 2047 (-72248)
ENSMUSG00000112216	1	peak 1838 (+14215)
ENSMUSG00000112252	1	peak 1839 (+14212)
ENSMUSG00000112640	1	peak 1795 (+54)
Entpd4	1	peak 2396 (-43083)
Ep300	1	peak 2554 (-71121)
Epas1	1	peak 2820 (-177763)
Epb41l4b	1	peak 687 (-118390)
Epcam	1	peak 2821 (-134206)
Epha3	1	peak 2676 (-307522)
Epha4	1	peak 80 (+333318)
Ephb1	1	peak 1692 (-136997)
Ephb2	1	peak 782 (+155121)
Epn1	1	peak 1212 (+4578)
Eps8	1	peak 1202 (+106570)
Erbb4	1	peak 67 (+2693)
Ercc2	1	peak 1217 (-16552)
Ercc6l2	1	peak 2260 (+205763)
Erich3	1	peak 648 (+91895)
Erp27	1	peak 1200 (-8653)
Esd	1	peak 2403 (-76050)
Esp15	1	peak 2764 (+204960)
Esp38	1	peak 2764 (-107436)
Esr2	1	peak 2097 (+90943)
Esrp1	1	peak 656 (+15928)
Esrrb	1	peak 2113 (-33600)
Esrrg	1	peak 210 (-735848)
Esx1	1	peak 3027 (-45052)
Etnppl	1	peak 603 (-173132)
Ets2	1	peak 2711 (+61336)
Etv1	1	peak 2060 (+13807)
Etv3	1	peak 536 (+5109)
Evi5l	1	peak 1356 (+7715)
Evx1	1	peak 1074 (-33233)
Exoc3l4	1	peak 2146 (-314)
Exoc5	1	peak 2369 (-201)
Exoc6b	1	peak 1099 (+92883)
Exph5	1	peak 1621 (+40235)
Ext1	1	peak 2523 (+273032)
Ext2	1	peak 348 (+172894)
Extl2	1	peak 583 (+17544)
F2r	1	peak 2297 (+7377)
F2rl1	1	peak 2297 (-85883)
F2rl3	1	peak 1432 (+519879)
Faap24	1	peak 1233 (+56653)
Fabp12	1	peak 444 (+23579)
Fabp4	1	peak 444 (-69028)
Fam107a	1	peak 2339 (-52914)
Fam109a	1	peak 954 (+132695)
Fam110c	1	peak 2047 (+94661)
Fam120a	1	peak 2235 (+2353)
Fam126a	1	peak 847 (-63019)
Fam13c	1	peak 1783 (-141264)
Fam160a2	1	peak 1289 (-714)
Fam160b2	1	peak 2400 (+14062)
Fam169b	1	peak 1254 (-2895)
Fam171a2	1	peak 1989 (-2003)
Fam172a	1	peak 2285 (-269715)
Fam173b	1	peak 2495 (+148646)
Fam174a	1	peak 98 (-726353)
Fam178b	1	peak 35 (+39091)
Fam181b	1	peak 1282 (+244039)
Fam186b	1	peak 2581 (+22549)
Fam196a	1	peak 1340 (+35226)
Fam205a1	1	peak 680 (+18398)
Fam205a4	1	peak 677 (+18369)
Fam206a	1	peak 686 (+56570)
Fam208a	1	peak 2359 (-156570)
Fam209	1	peak 432 (+12747)
Fam20b	1	peak 159 (-3236)
Fam213a	1	peak 2366 (+65005)
Fam221a	1	peak 1065 (-45547)
Fam222a	1	peak 948 (-18012)
Fam240b	1	peak 2262 (+25578)
Fam3c	1	peak 1021 (-61235)
Fam46c	1	peak 562 (-153886)
Fam49a	1	peak 2031 (-266572)
Fam53b	1	peak 1338 (+28237)
Fam58b	1	peak 1951 (+33700)
Fam71d	1	peak 2099 (-340525)
Fam76a	1	peak 775 (-15888)
Fam76b	1	peak 1580 (+92404)
Fam83c	1	peak 415 (+1701)
Fars2	1	peak 2203 (-11896)
Farsb	1	peak 81 (+97811)
Fat1	1	peak 1406 (-148415)
Fat3	1	peak 1582 (-764264)
Fbln5	1	peak 2125 (+20396)
Fbn2	1	peak 2892 (+188845)
Fbxl14	1	peak 1178 (-27450)
Fbxl18	1	peak 981 (+25575)
Fbxo11	1	peak 2822 (-332355)
Fbxo4	1	peak 2464 (+6943)
Fbxo8	1	peak 1412 (+378403)
Fbxw11	1	peak 1897 (+60010)
Fcgbp	1	peak 1224 (+12994)
Fcnb	1	peak 271 (-28431)
Fdx1	1	peak 1619 (-31960)
Fem1b	1	peak 1635 (-6423)
Fer1l6	1	peak 2531 (+221352)
Fgf9	1	peak 2384 (+512265)
Fgfbp3	1	peak 2964 (+6410)
Fgfr1op	1	peak 2723 (-25)
Fgfr3	1	peak 859 (-5029)
Fgr	1	peak 775 (-35656)
Fhl1	1	peak 3019 (-1693)
Fhl2	1	peak 42 (-138017)
Flrt1	1	peak 2934 (-81604)
Flrt3	1	peak 397 (-113794)
Fmo1	1	peak 167 (+1259)
Fmo5	1	peak 559 (+5595)
Fmo9	1	peak 172 (+15615)
Fndc9	1	peak 1915 (-57660)
Fnip2	1	peak 518 (+59125)
Focad	1	peak 719 (+206752)
Foxa2	1	peak 406 (-127346)
Foxb1	1	peak 1651 (-55717)
Foxg1	1	peak 2072 (-296800)
Foxi1	1	peak 1902 (+97072)
Foxi3	1	peak 1087 (+118442)
Foxl2	1	peak 1686 (-10313)
Foxn2	1	peak 2822 (-43065)
Foxn3	1	peak 2124 (-117279)
Frem1	1	peak 711 (-41348)
Frmd4a	1	peak 229 (+236635)
Frmd8	1	peak 2931 (+44709)
Fryl	1	peak 896 (+99341)
Fshb	1	peak 358 (-125589)
Fshr	1	peak 2823 (+86193)
Fstl3	1	peak 1790 (+3373)
Fth1	1	peak 2937 (+466)
Furin	1	peak 1265 (-40983)
Fut4	1	peak 1581 (+4878)
Fut9	1	peak 667 (-209811)
Fxyd3	1	peak 1230 (-4126)
Fzd1	1	peak 824 (-283643)
Fzd10	1	peak 959 (+48694)
G2e3	1	peak 2073 (-425176)
G6pd2	1	peak 887 (-439214)
Gabarapl1	1	peak 1192 (-14285)
Gabrg2	1	peak 1911 (+208063)
Gabrg3	1	peak 1245 (+833420)
Gabrr3	1	peak 2668 (+2039)
Galnt13	1	peak 306 (-207594)
Galnt14	1	peak 2799 (+169859)
Galnt5	1	peak 309 (-368288)
Galnt7	1	peak 1413 (-173643)
Galr1	1	peak 2921 (+813621)
Gas2l3	1	peak 1804 (+47797)
Gatsl3	1	peak 1862 (-1317)
Gbx2	1	peak 94 (+447124)
Gca	1	peak 314 (+36006)
Gcc1	1	peak 1024 (+92463)
Gcg	1	peak 313 (+2513)
Gclc	1	peak 1660 (-85114)
Gcnt1	1	peak 2945 (+279955)
Gcnt2	1	peak 2221 (+25324)
Gdap1	1	peak 9 (+194268)
Gdf11	1	peak 1859 (+23958)
Gfod1	1	peak 2226 (-26850)
Gga2	1	peak 1315 (-37576)
Gimap9	1	peak 1063 (-188)
Gimd1	1	peak 607 (-211875)
Ginm1	1	peak 1727 (+4435)
Gins2	1	peak 1477 (+83858)
Gipc1	1	peak 1440 (-30720)
Gja10	1	peak 668 (+225109)
Gja3	1	peak 2378 (-14251)
Gja5	1	peak 558 (+55771)
Gjb2	1	peak 2378 (+32351)
Gjb5	1	peak 769 (-71758)
Gjd2	1	peak 360 (+143741)
Gjd4	1	peak 2836 (+65746)
Gli3	1	peak 2167 (+86942)
Glrb	1	peak 524 (-79541)
Glrx	1	peak 2282 (+93634)
Glrx3	1	peak 1346 (+422988)
Glrx5	1	peak 2130 (-23784)
Glul	1	peak 155 (+213508)
Gm10076	1	peak 2437 (-98168)
Gm10093	1	peak 2803 (-55992)
Gm10118	1	peak 1776 (+228558)
Gm10130	1	peak 411 (+34192)
Gm10184	1	peak 2824 (-774815)
Gm10251	1	peak 2337 (-24939)
Gm10260	1	peak 2298 (-122026)
Gm10283	1	peak 1414 (+527194)
Gm10308	1	peak 2824 (-403229)
Gm10338	1	peak 2338 (+158253)
Gm10384	1	peak 2498 (+70410)
Gm10408	1	peak 2334 (-211903)
Gm10479	1	peak 2036 (+574420)
Gm10577	1	peak 738 (+191778)
Gm10944	1	peak 1733 (+253273)
Gm10974	1	peak 1248 (-164804)
Gm11084	1	peak 329 (-19183)
Gm11114	1	peak 1674 (-639290)
Gm11232	1	peak 700 (+30186)
Gm12253	1	peak 1924 (+14478)
Gm12728	1	peak 748 (+411811)
Gm12830	1	peak 753 (-304897)
Gm12887	1	peak 765 (-500827)
Gm13102	1	peak 794 (-93217)
Gm13128	1	peak 795 (-13900)
Gm136	1	peak 675 (-14873)
Gm13691	1	peak 342 (+84654)
Gm14226	1	peak 414 (+1155)
Gm14496	1	peak 440 (+21764)
Gm14819	1	peak 3013 (+473752)
Gm15023	1	peak 3025 (+91282)
Gm16427	1	peak 917 (+202676)
Gm16432	1	peak 193 (-8029)
Gm16867	1	peak 2397 (+24)
Gm19410	1	peak 1401 (-50801)
Gm19965	1	peak 110 (+110936)
Gm20518	1	peak 2610 (+25594)
Gm20604	1	peak 2127 (-22582)
Gm21060	1	peak 3009 (-34348)
Gm21093	1	peak 677 (+50299)
Gm21293	1	peak 1825 (-126979)
Gm21370	1	peak 2332 (-3868)
Gm21738	1	peak 2346 (+1246)
Gm21969	1	peak 790 (-13444)
[truncated: 1,509 more rows]
[truncated: 9 more columns]

## Sheet: Sheet1
# GREAT version 4.0.4	Species assembly: mm10	Association rule: Basal+extension: 5000 bp upstream, 1000 bp downstream, 1000000 bp max extension, curated regulatory domains included
