# Supplementary material for: AP-2α and AP-2β cooperatively function in the craniofacial surface ectoderm to regulate chromatin and gene expression dynamics during facial development
Source: eLife. 2022 Mar 25;11:e70511. doi: 10.7554/eLife.70511 (PMC9038197; doi:10.7554/eLife.70511)
Supplement: Supplementary file 3. — Note, each tab of the spreadsheet contains a subset of the larger dataset that was used for further analysis. [file elife-70511-supp3.xlsx]

## Sheet: Gene_Expression_ALL
test_id	gene	locus	status	value_1	value_2	log2(fold_change)	test_stat	p_value	q_value	significant	CTRL_1	CTRL_2	CTRL_3	ABC_1	ABC_2	ABC_3
ENSMUSG00000056673	Kdm5d	Y:897787-956786	OK	12.318	0.00543937	-11.145	-0.861328	0.108	0.674309	no	11.8099	12.5406	12.6035	0	0.0148701	0.00688741
ENSMUSG00000069045	Ddx3y	Y:1260770-1286629	OK	17.4522	0.00867203	-10.9747	-1.56214	0.1726	0.828247	no	16.4746	17.2164	18.6654	0	0.0109653	0.0237229
ENSMUSG00000069049	Eif2s3y	Y:1010542-1028847	OK	35.1163	0.0319175	-10.1036	-2.43479	0.0001	0.00392328	yes	31.3692	37.6131	36.3667	0.0148689	0.0819662	0.015966
ENSMUSG00000068457	Uty	Y:1096860-1245759	OK	10.9847	0.0125219	-9.77683	-1.03656	5e-05	0.002075	yes	9.94635	11.01	11.9979	0.00899374	0.016071	0.016029
ENSMUSG00000102550	Gm8276	3:59431536-59433348	OK	10.4956	0.080507	-7.02646	-9.54249	5e-05	0.002075	yes	15.5816	15.8677	0.0375019	0.0905439	0.0599188	0.0810212
ENSMUSG00000105098	AC099760.1	8:9205901-9771161	OK	3.37105	0.03396	-6.63322	-0.708723	0.29145	0.969188	no	5.15693	2.48414	2.47208	0	0	0.13584
ENSMUSG00000048377	Foxi2	7:135410307-135413622	OK	1.38271	0.0197542	-6.1292	-5.71977	0.02995	0.325022	no	1.58807	1.23215	1.32791	0.0296859	0.0196451	0
ENSMUSG00000053522	Lgals7	7:28859586-28876331	OK	0.689797	0.0109303	-5.97977	-0.29327	0.24405	0.931559	no	0.555684	0.656256	0.85745	0	0.0437211	0
ENSMUSG00000031179	3830417A13Rik	X:64173547-64178778	OK	0.607903	0.0129032	-5.55804	-0.662154	0.15	0.776175	no	0.373408	0.511418	0.938882	0.0167913	0	0.0180303
ENSMUSG00000097352	C920009B18Rik	10:22158568-22374139	OK	1.52224	0.0377492	-5.33361	-0.636323	0.04805	0.438476	no	4.53452	0.0322004	0	0.0604572	0.0300824	0
ENSMUSG00000063130	Calml3	13:3802892-3804318	OK	0.396579	0.0106584	-5.21754	-2.06052	0.1987	0.875881	no	0.28789	0.35917	0.542675	0	0	0.0426337
ENSMUSG00000020159	Gabrp	11:33550780-33578959	OK	1.23261	0.034273	-5.1685	-1.92227	5e-05	0.002075	yes	0.686699	1.1087	1.90243	0.0157841	0.0235021	0.0820215
ENSMUSG00000048087	Gm4737	16:46152996-46155077	OK	5.02519	0.187492	-4.74428	-9.77975	5e-05	0.002075	yes	0.287505	14.6274	0.160657	0.181014	0.179683	0.208256
ENSMUSG00000049891	Gm7984	8:75398510-75399048	OK	0.984724	0.0553761	-4.15238	-2.62729	0.24705	0.932052	no	0	2.77423	0.179943	0	0.143752	0.0777519
ENSMUSG00000085582	3110099E03Rik	2:115493512-115527744	OK	2.37607	0.135871	-4.12827	-3.93662	5e-05	0.002075	yes	2.47747	2.12864	2.5221	0.178992	0.0786731	0.106825
ENSMUSG00000091071	1700030C10Rik	12:20804380-20815779	OK	1.39328	0.0826793	-4.07481	-1.12329	0.00575	0.103909	no	4.07789	0.00678515	0.0951625	0.0957328	0.057015	0.0822368
ENSMUSG00000108894	RP23-103E11.7	7:6131490-6155997	OK	2.16519	0.142086	-3.92966	-0.815277	0.38555	0.999642	no	3.58461	0.913552	1.99739	0	0.568343	0
ENSMUSG00000081998	Gm13245	4:146153455-147492201	OK	1.16859	0.096442	-3.59896	-1.04914	0.3742	0.999642	no	0	0.382321	3.12345	0	0	0.385768
ENSMUSG00000021604	Irx4	13:73260478-73269608	OK	1.6664	0.154945	-3.42691	-6.8159	5e-05	0.002075	yes	1.53003	1.50471	1.96445	0.211538	0.101063	0.0956409
ENSMUSG00000095526	Gm10243	6:48504336-48534832	OK	6.87237	0.654009	-3.39343	-0.864001	0.21845	0.897699	no	0.356237	19.803	0.457854	0.736935	0.548671	0.593496
ENSMUSG00000096349	Gm22513	12:54696781-54696945	OK	8.85926	0.860983	-3.36313	-3.98508	0.1935	0.868477	no	3.22251	21.2844	2.07084	0	1.65435	1.78958
ENSMUSG00000031535	Dkk4	8:22624042-22627547	OK	1.96304	0.200847	-3.28892	-5.70948	5e-05	0.002075	yes	1.79416	1.95181	2.14314	0.130997	0.260067	0.281327
ENSMUSG00000056054	S100a8	3:90668977-90670035	OK	1.19822	0.12822	-3.2242	-2.18604	0.0694	0.540578	no	0.0828481	1.82402	1.68779	0.171387	0.170106	0
ENSMUSG00000065649	Snora74a	18:35553370-35593835	OK	1.37308	0.149655	-3.1977	-0.1482	0.4704	0.999642	no	0	4.11925	0	0	0.598621	0
ENSMUSG00000065232	Gm22973	12:59040334-59040525	OK	2.07547	0.241976	-3.1005	-2.98386	0.0902	0.62206	no	0	6.2264	0	0	0.967902	0
ENSMUSG00000106392	Gm5870	5:104989049-104989331	OK	0.627501	0.0762449	-3.0409	-1.3932	0.1012	0.658597	no	0.823768	0	1.05873	0	0	0.30498
ENSMUSG00000022996	Wnt10b	15:98771752-98778150	OK	0.841554	0.106457	-2.98278	-4.61508	5e-05	0.002075	yes	0.603453	0.906991	1.01422	0.0960243	0.121169	0.11261
ENSMUSG00000071561	BC100530	16:36359381-36387406	OK	0.460701	0.0593699	-2.95603	-0.962896	0.21355	0.894775	no	0.152754	0.640358	0.588992	0.11874	0	0
ENSMUSG00000099250	Rn7s2	12:69361178-69361481	OK	0.928475	0.119964	-2.95226	-1.81095	0.25045	0.93511	no	0.23196	2.55347	0	0.239928	0	0
ENSMUSG00000088025	Rprl3	8:3803068-3803358	OK	3.06231	0.398678	-2.94132	-1.7797	0.03615	0.365864	no	0	7.55374	1.63318	0.525749	0.260942	0.282273
ENSMUSG00000095217	Hist1h2bn	13:21754122-21754503	OK	0.762902	0.106739	-2.83741	-2.1291	0.25095	0.93511	no	0.262896	2.02581	0	0	0.134963	0.291993
ENSMUSG00000088088	Rmrp	4:43492787-43495921	OK	58.5221	8.19626	-2.83594	-1.59994	0.19175	0.866758	no	1.53733	171.263	2.76616	13.0391	5.68242	1.02448
ENSMUSG00000092837	Rpph1	14:50807448-50807767	OK	15.9771	2.25487	-2.82489	-4.69319	5e-05	0.002075	yes	1.18769	42.9273	3.81614	4.09495	0.609726	0.219856
ENSMUSG00000040680	Kremen2	17:23741199-23754065	OK	3.98316	0.584332	-2.76905	-6.40734	5e-05	0.002075	yes	3.62012	3.66088	4.66847	0.304634	0.869384	0.858674
ENSMUSG00000034486	Gbx2	1:89927955-89933290	OK	4.05554	0.602227	-2.75152	-5.91089	5e-05	0.002075	yes	3.75055	4.15419	4.26189	0.643304	0.661688	0.460611
ENSMUSG00000000125	Wnt3	11:103774149-103817957	OK	2.0865	0.314081	-2.73188	-7.28247	5e-05	0.002075	yes	2.15732	1.78112	2.32106	0.219761	0.444682	0.37212
ENSMUSG00000064995	Gm26003	2:158353699-158361580	OK	2.01628	0.309801	-2.70229	-0.0844152	0.461	0.999642	no	3.37944	2.66941	0	0	1.2392	0
ENSMUSG00000061527	Krt5	15:101707069-101712891	OK	3.25282	0.516116	-2.65592	-7.08837	5e-05	0.002075	yes	1.81946	3.45955	4.47946	0.232189	0.812751	0.787335
ENSMUSG00000100837	1700063D05Rik	9:41206136-41217627	OK	0.551844	0.0902189	-2.61276	-1.21342	0.09795	0.647654	no	0.0507789	1.01305	0.591705	0.0525231	0	0.25583
ENSMUSG00000104360	Gm8762	1:136789181-136789520	OK	0.26576	0.0438103	-2.60078	-0.781198	0.13975	0.754824	no	0.170677	0.187884	0.438719	0	0.175241	0
ENSMUSG00000056071	S100a9	3:90692631-90695721	OK	0.902334	0.155535	-2.53642	-2.01199	0.0784	0.575015	no	0.0742732	0.584725	2.048	0.155258	0.311627	0
ENSMUSG00000099908	Gm28539	16:18836577-18970309	OK	1.00587	0.173601	-2.53459	-0.939188	0.1965	0.871533	no	1.77645	1.08962	0.151539	0.187507	0.137978	0.181414
ENSMUSG00000025916	Ppp1r42	1:9960162-10009136	OK	0.276214	0.048172	-2.51952	-0.770366	0.0041	0.0810044	no	0.43152	0.286121	0.111002	0.0717677	0	0.0491525
ENSMUSG00000103259	2610105M22Rik	9:35361960-35363113	OK	0.325364	0.0596662	-2.44707	-2.06706	0.00645	0.113335	no	0.345879	0.407946	0.222267	0	0.101465	0.1372
ENSMUSG00000026875	Traf1	2:34941749-34961772	OK	0.425144	0.0785163	-2.43689	-0.845984	0.05315	0.47065	no	0.223245	0.114377	0.937811	0.11831	0.0774445	0
ENSMUSG00000088835	Gm23547	6:124712335-124718831	OK	1.46688	0.273632	-2.42245	-0.181819	0.33465	0.999642	no	0	3.32672	1.07393	0	1.09453	0
ENSMUSG00000102554	Gm37568	9:108302957-108338273	OK	0.42417	0.0805564	-2.39657	-0.195105	0.27035	0.95403	no	0.580235	0.319409	0.372866	0	0	0.322226
ENSMUSG00000021508	Cxcl14	13:56288646-56296551	OK	18.0169	3.44994	-2.38471	-9.95081	5e-05	0.002075	yes	15.9395	15.6324	22.4788	2.2932	4.24024	4.97312
ENSMUSG00000109480	Gm45042	8:10929886-10930097	OK	1.80586	0.347737	-2.37662	-1.6437	0.22175	0.900743	no	1.34476	1.48034	2.59249	0.695474	0	0
ENSMUSG00000068122	Agtr2	X:21484543-21489164	OK	0.612762	0.119877	-2.35378	-1.63856	0.0008	0.0233044	yes	0.129583	0.452299	1.2564	0.0551906	0.140875	0.228251
ENSMUSG00000093759	Scarletltr	9:64080760-64086961	OK	0.896784	0.175669	-2.3519	-2.04827	0.25525	0.939234	no	0	0.977853	1.7125	0	0.456025	0.246652
ENSMUSG00000094377	Gm24407	5:115490253-115490394	OK	7.15262	1.44015	-2.31225	-6.48435	0.2202	0.898239	no	0	21.4579	0	2.88031	0	0
ENSMUSG00000094655	Gm25360	1:72226239-72226430	OK	4.84276	0.975071	-2.31225	-6.17572	0.0939	0.634853	no	0	14.5283	0	1.95014	0	0
ENSMUSG00000025105	Bnc1	7:81966671-81992618	OK	2.46354	0.497841	-2.30697	-7.75233	5e-05	0.002075	yes	2.2987	2.48392	2.60799	0.4646	0.504589	0.557576
ENSMUSG00000090145	Ugt1a6b	1:88055387-88220002	OK	0.270338	0.0553734	-2.2875	-1.22239	0.03495	0.356779	no	0.382649	0.213697	0.214669	0.0674304	0	0.0866329
ENSMUSG00000069270	Hist1h2ac	13:23683448-23683924	OK	0.553443	0.113823	-2.28165	-1.65913	0.18115	0.847128	no	0.257635	0.850828	0.551867	0	0.264524	0.190766
ENSMUSG00000061535	C1qtnf7	5:43515537-43618803	OK	0.37257	0.0767909	-2.2785	-1.75088	0.00185	0.0444134	yes	0.195549	0.382562	0.539598	0.0449137	0.110915	0.106422
ENSMUSG00000069309	Hist1h2an	13:21786825-21787218	OK	0.315839	0.0658528	-2.26187	-1.01774	0.1976	0.873831	no	0.246476	0.542651	0.15839	0	0.126534	0.136877
ENSMUSG00000039238	Zfp750	11:121451948-121673153	OK	0.845967	0.176761	-2.2588	-1.49504	0.1518	0.780112	no	0.844863	0.657004	1.03603	0.120271	0.191009	0.275493
ENSMUSG00000084744	Gm25291	11:51692263-51763634	OK	3.15564	0.662328	-2.25231	-2.34741	0.43905	0.999642	no	0	2.83938	6.62753	0	2.64931	0
ENSMUSG00000065822	Snord15a	7:99477895-99483738	OK	8.56202	1.80569	-2.2454	-0.264451	0.4657	0.999642	no	0	25.6861	0	2.4135	2.39576	0
ENSMUSG00000053528	A530021J07Rik	7:83061782-83201586	OK	0.54	0.113964	-2.24438	-1.18301	0.0156	0.210683	no	0.371069	0.465503	0.783429	0.0481119	0.113682	0.245949
ENSMUSG00000025150	Cbr2	11:120729488-120732114	OK	3.11615	0.660804	-2.23747	-2.15427	5e-05	0.002075	yes	2.44872	4.06451	2.83522	0.48048	0.830413	0.851844
ENSMUSG00000100714	2010308F09Rik	X:13234640-13247736	OK	0.425451	0.0913117	-2.22012	-1.40226	0.2607	0.94277	no	0.348609	0.479698	0.448047	0	0.26845	0.0967969
ENSMUSG00000021647	Cartpt	13:99898483-99900683	OK	0.645399	0.138719	-2.21802	-2.25396	0.00405	0.080498	no	0.909265	0.577464	0.449468	0.108519	0.143628	0.194211
ENSMUSG00000110451	Rn7sk	9:78175302-78175633	OK	49.7263	10.7456	-2.21026	-5.82402	5e-05	0.002075	yes	4.43072	138.103	6.6454	16.241	7.01554	3.48493
ENSMUSG00000029205	Chrna9	5:65934920-65977326	OK	0.343869	0.0743894	-2.20869	-0.647528	0.0551	0.477987	no	0.3233	0.386437	0.32187	0.0772962	0.142965	0
ENSMUSG00000054146	Krt15	11:100131757-100135928	OK	3.74254	0.813966	-2.20098	-4.54665	5e-05	0.002075	yes	3.2232	4.23907	3.76536	0.547315	1.13368	1.02756
ENSMUSG00000044177	Wfikkn2	11:94235955-94246005	OK	1.77848	0.388165	-2.1959	-3.60131	5e-05	0.002075	yes	1.15267	1.88315	2.29963	0.256548	0.543702	0.495863
ENSMUSG00000105103	Gm43191	3:116631163-116712831	OK	0.875381	0.192482	-2.18519	-0.51187	0.5302	0.999642	no	0.862837	0	1.76331	0	0.00592796	0.764001
ENSMUSG00000058463	Gm5471	15:44971793-44972135	OK	0.972962	0.21455	-2.18107	-1.93544	0.0195	0.244929	no	1.17019	1.10414	0.644556	0	0.858202	0
ENSMUSG00000065701	Rny1	6:47788068-47788180	OK	15.2543	3.39378	-2.16825	-9.93967	0.2186	0.897699	no	0	28.895	16.8678	6.78756	0	0
ENSMUSG00000082617	Smt3h2-ps	X:7752129-7752414	OK	0.300922	0.0684357	-2.13657	-0.711695	0.1343	0.740398	no	0.266613	0.293493	0.34266	0	0.273743	0
ENSMUSG00000058934	Igf1os	10:87826376-87937042	OK	0.271415	0.0621367	-2.12698	-0.386967	0.1969	0.872358	no	0.259514	0.350648	0.204082	0.0304552	0.187636	0
ENSMUSG00000087968	Gm25395	1:87755869-87792428	OK	1.01327	0.235757	-2.10365	-0.476565	0.432	0.999642	no	0.304491	2.34423	0.391091	0.315136	0.312757	0
ENSMUSG00000054362	Lexm	4:106590908-106617241	OK	0.369501	0.0860038	-2.10311	-1.28583	0.0575	0.48955	no	0.0348385	0.564843	0.508822	0.0180091	0.0357706	0.272226
ENSMUSG00000105072	Gm44335	9:44334693-44336077	OK	9.24184	2.15494	-2.10054	-0.274997	0.2827	0.964942	no	13.9233	3.06541	10.7368	2.88031	2.85913	0
ENSMUSG00000085949	Gm14275	2:172288132-172290520	OK	0.346725	0.081673	-2.08586	-1.24908	0.25525	0.939234	no	0.206495	0.568284	0.265394	0	0.212017	0.114675
ENSMUSG00000034226	Rhov	2:119269200-119271272	OK	0.733211	0.17298	-2.08362	-3.72982	5e-05	0.002075	yes	0.516431	0.757996	0.925205	0.178056	0.144611	0.191196
ENSMUSG00000026167	Wnt10a	1:74791515-74804179	OK	0.481702	0.118938	-2.01792	-2.2516	0.00035	0.0114701	yes	0.424958	0.475434	0.544714	0.0321625	0.273285	0.138144
ENSMUSG00000022330	Osr2	15:35296097-35303304	OK	3.34426	0.828664	-2.01283	-5.67218	5e-05	0.002075	yes	3.62924	2.53309	3.87047	0.607012	0.951394	1.14924
ENSMUSG00000064288	Hist1h4k	13:21750193-21750505	OK	2.84869	0.713538	-1.99724	-1.86841	0.004	0.0797923	no	2.51285	4.14929	1.88393	0.433193	1.29003	0.69774
ENSMUSG00000053164	Gpr21	2:37443278-37703859	OK	0.520336	0.130679	-1.99341	-0.420896	0.1864	0.859464	no	0.130585	0.662012	0.768411	0.0924165	0.162304	0.17558
ENSMUSG00000020218	Wif1	10:121033959-121100650	OK	1.94496	0.489087	-1.99157	-4.6117	5e-05	0.002075	yes	1.60107	1.77986	2.45393	0.389848	0.53034	0.646313
ENSMUSG00000034031	Ccdc182	11:88294057-88295261	OK	0.337219	0.0850201	-1.98781	-1.87637	0.00715	0.12238	no	0.422053	0.258114	0.331489	0.0727583	0.168521	0.0260425
ENSMUSG00000085463	9430024E24Rik	2:33716360-33718899	OK	0.612514	0.154823	-1.98413	-1.86561	0.0028	0.0610127	no	0.782047	0.405126	0.650368	0.0951658	0.377864	0.0510942
ENSMUSG00000106147	Rnu3a	10:40258466-40258680	OK	3.1298	0.816896	-1.93785	-2.24112	0.32725	0.999642	no	0	8.57085	0.818551	1.34653	0.574515	0
ENSMUSG00000027596	a	2:154791095-155051012	OK	3.06355	0.817737	-1.90549	-0.273098	0.1923	0.867999	no	2.74969	3.88861	2.55234	0.39502	0.784228	1.69668
ENSMUSG00000087658	Hotairm1	6:52155589-52162119	OK	0.865955	0.232226	-1.89876	-0.752018	0.1719	0.826812	no	0.18685	0.414789	1.99623	0.389742	0.047233	0.102188
ENSMUSG00000001020	S100a4	3:90560555-90606045	OK	2.76706	0.743375	-1.89619	-2.08194	0.0035	0.071813	no	2.54893	2.52861	3.22364	0.180304	0.634843	1.97805
ENSMUSG00000090334	Gm17149	8:18595130-18803189	OK	0.261596	0.0703163	-1.89541	-0.320537	0.41825	0.999642	no	0.135962	0.29934	0.349487	0.140633	0	0
ENSMUSG00000040055	Gjb6	14:57123302-57133611	OK	1.4827	0.403536	-1.87746	-2.62639	0.0008	0.0233044	yes	1.42419	1.3451	1.67881	0.311248	0.923103	0.0685428
ENSMUSG00000099556	Gm28857	1:130731975-130744622	OK	0.506113	0.138108	-1.87366	-0.844093	0.20605	0.885591	no	0.316699	0.11621	1.08543	0.109192	0.216779	0.117267
ENSMUSG00000103011	Gm8860	3:9072766-9073211	OK	0.280523	0.0766203	-1.87232	-1.06415	0.30085	0.977732	no	0.29058	0.426502	0.124488	0	0.198901	0.10758
ENSMUSG00000030214	Plbd1	6:136612069-136661928	OK	4.26796	1.1681	-1.86938	-1.0753	0.0251	0.289105	no	5.66222	3.97323	3.16842	1.70115	0.450435	0.81966
ENSMUSG00000039155	Cdh26	2:178430530-178487366	OK	0.315778	0.0865305	-1.86763	-1.03686	0.0388	0.38467	no	0.135747	0.286692	0.524894	0.0270855	0.0179174	0.274034
ENSMUSG00000074280	Gm6166	9:57483912-57484585	OK	122.22	33.531	-1.86591	-6.99605	5e-05	0.002075	yes	107.715	136.158	122.786	0.671176	132.172	0.609826
ENSMUSG00000034009	Rxfp1	3:79641610-79737880	OK	0.528817	0.145138	-1.86535	-3.43297	5e-05	0.002075	yes	0.405335	0.639248	0.541869	0.147797	0.168798	0.11616
ENSMUSG00000092505	Gm19246	7:42473385-42505740	OK	1.4035	0.385522	-1.86414	-0.624461	0.4639	0.999642	no	1.10382	1.21511	1.89156	0	1.13334	0.408744
ENSMUSG00000022218	Tgm1	14:55700008-55713492	OK	0.81628	0.225253	-1.85752	-4.13198	5e-05	0.002075	yes	0.681287	0.780379	0.987173	0.228547	0.198504	0.245413
ENSMUSG00000086915	Gm16365	10:39368854-39732007	OK	0.305026	0.0842695	-1.85585	-0.308725	0.0947	0.637103	no	0.250913	0.533272	0.130892	0	0.140187	0.196891
ENSMUSG00000064398	Gm23628	X:20614522-20614695	OK	2.56358	0.711972	-1.84827	-1.33069	0.3566	0.999642	no	1.3324	2.93346	3.42488	0	1.36803	1.47986
ENSMUSG00000110613	RP23-143B2.2	8:108553251-108584595	OK	0.717712	0.20206	-1.82862	-2.24107	0.0028	0.0610127	no	0.385296	0.975526	0.792313	0.278971	0.0791201	0.171176
ENSMUSG00000109008	Gm44899	7:80979892-80993415	OK	0.654207	0.184602	-1.82533	-1.41025	0.2711	0.954312	no	0.622682	0.441801	0.89814	0	0.461769	0.276639
ENSMUSG00000078894	2210418O10Rik	2:176226568-176240328	OK	0.620015	0.175647	-1.81962	-1.03109	0.4032	0.999642	no	0.624547	0.0500694	1.18543	0	0.673775	0.0288137
ENSMUSG00000080846	Gm13379	2:21341924-21830547	OK	0.407526	0.117055	-1.7997	-1.25199	0.0283	0.312245	no	0.336707	0.308877	0.576995	0.174136	0.0576184	0.0623306
ENSMUSG00000080816	Gm12447	4:46300006-46346412	OK	0.404261	0.11671	-1.79236	-0.481777	0.38605	0.999642	no	0.439025	0.0966575	0.677099	0.0908209	0.0901532	0.195046
ENSMUSG00000018486	Wnt9b	11:103727363-103749821	OK	3.8608	1.11563	-1.79104	-7.03261	5e-05	0.002075	yes	3.62378	3.42011	4.53852	0.737268	1.44694	1.54104
ENSMUSG00000052951	C130021I20Rik	2:33641192-33646354	OK	3.79767	1.10643	-1.7792	-4.31165	5e-05	0.002075	yes	3.94196	3.58702	3.86402	1.14518	1.06855	1.0668
ENSMUSG00000001504	Irx2	13:72628819-72634198	OK	4.02257	1.17257	-1.77844	-2.81106	5e-05	0.002075	yes	4.40646	3.39994	4.2613	0.897402	1.19872	1.69676
ENSMUSG00000030862	Cpxm2	7:130162450-133124354	OK	0.913378	0.267254	-1.773	-0.157994	0.12945	0.726401	no	0.542229	1.14451	1.05339	0.0961847	0.5759	0.300747
ENSMUSG00000086804	Gm43154	6:31605189-31922270	OK	0.388451	0.114324	-1.7646	-0.703872	0.00045	0.0142116	yes	0.437399	0.464087	0.263867	0.0832863	0.115988	0.174736
ENSMUSG00000086938	4930481A15Rik	19:5406739-5424979	OK	0.564701	0.166402	-1.76281	-0.379936	0.1115	0.683356	no	0.644604	0.259283	0.790215	0.0528652	0.182424	0.377454
ENSMUSG00000054764	Mtnr1a	8:45069136-45088506	OK	0.330195	0.0977817	-1.75568	-0.717421	0.08105	0.588441	no	0.293482	0.323935	0.373169	0.141467	0.0702148	0.0379774
ENSMUSG00000060678	Hist1h4c	13:23698059-23698454	OK	1.59978	0.47704	-1.74569	-1.66957	0.0153	0.208507	no	0.121966	3.8936	0.783772	0.630774	0.375682	0.270929
ENSMUSG00000034591	Slc41a2	10:83230847-83337882	OK	0.266611	0.0803352	-1.73063	-0.610368	0.00955	0.151671	no	0.164569	0.379307	0.255957	0.0695666	0.0902861	0.0919216
ENSMUSG00000056836	Gm6851	7:40190936-40191331	OK	1.38001	0.416058	-1.72982	-1.59583	0.00755	0.128296	no	1.34162	1.0741	1.7243	0.378465	0.500909	0.406393
ENSMUSG00000056174	Col8a2	4:126286792-126314330	OK	9.82168	2.97628	-1.72246	-6.70564	5e-05	0.002075	yes	8.22567	9.79492	11.4445	1.92913	3.92915	4.11772
ENSMUSG00000049436	Upk1b	16:38773183-38800203	OK	0.597981	0.181798	-1.71776	-3.04214	5e-05	0.002075	yes	0.434711	0.511541	0.847691	0.108534	0.277037	0.233087
ENSMUSG00000075031	Hist1h2bb	13:23746789-23747241	OK	1.45765	0.443942	-1.7152	-1.81326	0.00515	0.0962246	no	0.658992	3.10899	0.60497	0.292126	0.773275	0.418244
ENSMUSG00000081800	Gm14200	2:158409847-158499253	OK	2.39867	0.732406	-1.71152	-0.407119	0.3999	0.999642	no	2.77763	2.03845	2.37994	0	1.90128	1.02835
ENSMUSG00000079069	8430423G03Rik	5:148871583-149015813	OK	0.282709	0.0864544	-1.70931	-0.372013	0.5015	0.999642	no	0.107606	0.533072	0.207449	0.0556511	0.055242	0.179273
ENSMUSG00000048534	Amica1	9:45079182-45135606	OK	0.258867	0.0791797	-1.70901	-0.798793	0.18785	0.860661	no	0.354124	0.194913	0.227566	0.0323194	0.171103	0.0809769
ENSMUSG00000084896	Gm11632	11:98082555-98150403	OK	0.375615	0.115435	-1.70217	-0.362439	0.6169	0.999642	no	0	1.12685	0	0	0.461742	0
ENSMUSG00000036169	Sostdc1	12:36314168-36318452	OK	8.94643	2.75564	-1.69892	-6.49808	5e-05	0.002075	yes	9.32604	7.02782	10.4854	2.22729	3.0984	3.46958
ENSMUSG00000097997	Gm27017	14:61598225-61682373	OK	0.348972	0.107828	-1.69438	-0.454088	0.52345	0.999642	no	0.362501	0.28505	0.399363	0.107134	0.159512	0.0575308
ENSMUSG00000056436	Cyct	2:76353941-76360450	OK	0.435025	0.135099	-1.68708	-1.30607	0.03985	0.392722	no	0	0.571329	0.733745	0.214732	0.0532883	0.0576445
ENSMUSG00000094152	Slc6a16	7:45241084-45273365	OK	0.27685	0.0862357	-1.68275	-0.898438	0.07475	0.560948	no	0.229279	0.379648	0.221624	0.0233886	0.210872	0.0872937
ENSMUSG00000085873	Ttc39aos1	4:109403793-109406155	OK	1.21581	0.381651	-1.6716	-1.88011	0.0009	0.0254108	yes	1.01354	1.09585	1.53805	0.0818552	0.791571	0.571321
ENSMUSG00000025911	Adhfe1	1:9547947-9631175	OK	0.374139	0.120049	-1.63995	-0.84936	0.04285	0.409343	no	0.141962	0.293302	0.687151	0.0914744	0.182581	0.114667
ENSMUSG00000081461	Rpl30-ps11	X:12456885-12457230	OK	0.929859	0.299609	-1.63393	-1.28878	0.14125	0.757722	no	0.655173	1.08184	1.05256	0.508258	0	0.181921
ENSMUSG00000091043	Glyatl3	17:40904740-40914350	OK	1.0169	0.327814	-1.63323	-2.57784	5e-05	0.002075	yes	0.980669	0.809655	1.26039	0.181134	0.287684	0.661304
ENSMUSG00000046352	Gjb2	14:57098599-57104702	OK	2.65037	0.860126	-1.62357	-5.03186	5e-05	0.002075	yes	2.25917	2.32271	3.36923	0.903845	0.875317	0.757497
ENSMUSG00000089281	Scarna6	1:87755869-87792428	OK	0.820961	0.266587	-1.62271	-0.571999	0.5115	0.999642	no	0.656625	1.80626	0	0	0.337376	0.728972
ENSMUSG00000085781	Gm15640	16:45746242-46010218	OK	0.587069	0.190892	-1.62078	-0.294042	0.35765	0.999642	no	0.579022	0.717074	0.465111	0.149728	0.222947	0.241165
ENSMUSG00000089739	Gm20431	2:167553313-167690418	OK	2.38215	0.777748	-1.61489	-0.628622	0.29695	0.973932	no	1.10378	1.38562	4.65704	0.00574892	0.950506	2.14899
ENSMUSG00000023084	Lrrc71	3:87617558-87824306	OK	0.387636	0.126698	-1.61331	-0.300524	0.1705	0.823195	no	0.507127	0.30419	0.35159	0.136815	0.0858609	0.147301
ENSMUSG00000023886	Smoc2	17:14279505-14404790	OK	6.71856	2.22056	-1.59723	-6.49191	5e-05	0.002075	yes	5.50087	6.44868	8.20614	1.4594	2.75981	3.20362
ENSMUSG00000081926	Gm15536	10:6740628-7052478	OK	24.1995	8.02865	-1.59175	-0.654374	0.2705	0.95403	no	6.13785	27.0232	39.4375	6.34804	12.6023	6.81624
ENSMUSG00000086324	Gm15564	16:35926510-36037131	OK	1.0218	0.339108	-1.5913	-0.271353	0.33035	0.999642	no	0.311548	2.14874	0.605127	0.487019	0.120916	0.261479
ENSMUSG00000089967	Gm16550	1:165137854-165160773	OK	6.56694	2.18114	-1.59014	-0.905205	0.31355	0.989758	no	4.21743	4.64263	10.8408	4.36229	0	0
ENSMUSG00000042367	Gjb3	4:127325234-127330844	OK	1.86445	0.625175	-1.57642	-3.94844	5e-05	0.002075	yes	1.97732	2.00109	1.61493	0.598715	0.679242	0.624028
ENSMUSG00000052192	Gm5963	16:35541144-35664732	OK	0.712041	0.241687	-1.55882	-0.616259	0.54505	0.999642	no	0.934887	0	1.20124	0.483373	0	0
ENSMUSG00000101152	Gm28305	9:104002543-104263617	OK	0.830738	0.282592	-1.55567	-0.196058	0.49495	0.999642	no	0	1.52867	0.963545	0.423757	0	0.282855
ENSMUSG00000088185	Scarna2	3:108554337-108554751	OK	0.770488	0.26247	-1.55362	-1.16996	0.031	0.332485	no	0.111049	2.20042	0	0.344591	0.114019	0.24668
ENSMUSG00000107961	Gm44036	6:86733488-86793584	OK	0.676661	0.231708	-1.54613	-0.483355	0.4796	0.999642	no	0.174324	0.959481	0.896179	0.180309	0.178985	0.387229
ENSMUSG00000085389	1700003M07Rik	4:129960373-129963657	OK	0.260396	0.0896271	-1.5387	-0.679863	0.1006	0.657283	no	0.208151	0.305515	0.267522	0.071756	0.137945	0.0770519
ENSMUSG00000030217	Art4	6:136848450-136857733	OK	2.01381	0.696259	-1.53223	-4.52397	5e-05	0.002075	yes	1.88704	1.8986	2.25578	0.671607	0.833336	0.608485
ENSMUSG00000077564	Gm23202	5:146832889-146837032	OK	8.85362	3.07172	-1.52722	-0.183343	0.4046	0.999642	no	3.86456	12.7626	9.93373	3.9973	0	4.29228
ENSMUSG00000065934	Gm25630	9:35421127-35507652	OK	1.34317	0.467485	-1.52265	-0.636826	0.45055	0.999642	no	0	1.86568	2.16383	0	0	1.86994
ENSMUSG00000065642	Snora69	X:37082519-37085402	OK	2.90346	1.01364	-1.51823	-0.581885	0.5109	0.999642	no	0	4.01859	4.6918	0	0	4.05457
ENSMUSG00000081897	Gm15067	X:144268048-144268204	OK	1.53367	0.535426	-1.51823	-2.18207	0.45865	0.999642	no	0	2.1227	2.4783	0	0	2.1417
ENSMUSG00000088151	Gm26347	10:128411615-128441438	OK	2.90346	1.01387	-1.5179	-1.33702	0.4826	0.999642	no	0	4.01859	4.6918	0	0	4.05549
ENSMUSG00000099517	Hist1h3g	13:23535433-23535860	OK	1.18362	0.414615	-1.51336	-1.48728	0.0281	0.311286	no	1.15089	1.72763	0.672348	0.216441	0.644548	0.581031
ENSMUSG00000084125	Gm8757	X:78624705-78625077	OK	0.312268	0.109427	-1.51282	-0.866869	0.28845	0.969188	no	0.276665	0.304558	0.355579	0	0.284064	0.153643
ENSMUSG00000064382	Gm26447	16:23107443-23127737	OK	37.5038	13.1477	-1.51223	-0.154664	0.4662	0.999642	no	22.5163	89.9951	0	10.8678	18.1354	12.7195
ENSMUSG00000084323	Gm14438	2:175270555-175271179	OK	0.381562	0.133819	-1.51164	-1.11488	0.03355	0.3483	no	0.6129	0.245343	0.286444	0.115264	0.0572083	0.247539
ENSMUSG00000087344	Gm15627	5:134098411-134099208	OK	0.29962	0.105327	-1.50826	-0.838468	0.13435	0.740427	no	0.200331	0.441057	0.257472	0.103606	0.102844	0.111252
ENSMUSG00000057499	Gm6177	1:160893119-160893584	OK	0.270144	0.095626	-1.49826	-1.03268	0.1009	0.657422	no	0.268434	0.196998	0.345	0	0.183742	0.198762
ENSMUSG00000073787	Gm10575	7:141461093-141471473	OK	1.46385	0.519898	-1.49346	-0.8158	0.15335	0.78466	no	0.915202	0.890427	2.58591	0.367341	0.61055	0.734361
ENSMUSG00000025064	Col17a1	19:47646343-47692094	OK	0.740111	0.264061	-1.48687	-1.29306	0.0114	0.170994	no	0.631576	0.777842	0.810917	0.15129	0.332012	0.421654
ENSMUSG00000069911	Fam196b	11:34226814-34783892	OK	1.35388	0.483329	-1.48602	-4.06705	5e-05	0.002075	yes	1.24183	1.30052	1.51929	0.457999	0.401311	0.616007
ENSMUSG00000098844	Mir6992	19:8741412-8756069	OK	4.80454	1.73326	-1.47091	-1.71534	0.50365	0.999642	no	5.70007	0	8.71355	0	0	6.93302
ENSMUSG00000032584	Mst1r	9:107906872-107920383	OK	0.646383	0.23335	-1.4699	-1.22415	0.0087	0.141714	no	0.532179	1.00286	0.404104	0.253017	0.182658	0.244707
ENSMUSG00000039617	Gm7488	3:21049564-21050248	OK	0.4583	0.165543	-1.46909	-1.34721	0.01435	0.20258	no	0.390191	0.483222	0.501487	0.201797	0.150235	0.108344
ENSMUSG00000028860	Sytl1	4:133253089-133263113	OK	0.883504	0.321199	-1.45977	-1.5114	0.00095	0.0265952	yes	0.580109	0.56179	1.50861	0.123711	0.513948	0.523426
ENSMUSG00000106718	Gm20052	5:37893771-37897917	OK	0.334878	0.122126	-1.45527	-0.583961	0.03995	0.393473	no	0.38936	0.523992	0.0912817	0.109033	0.127919	0.142518
ENSMUSG00000042874	D930007J09Rik	13:32802037-32822609	OK	0.266476	0.0974862	-1.45074	-0.279294	0.49775	0.999642	no	0.369714	0.271326	0.15839	0	0.253067	0.136877
ENSMUSG00000080582	Gm24907	X:150806369-150814345	OK	2.78745	1.02104	-1.44891	-0.695316	0.47565	0.999642	no	3.97774	4.3846	0	0	4.08414	0
ENSMUSG00000091037	Gm17661	2:90894633-90918258	OK	1.13151	0.415977	-1.44367	-0.241234	0.4453	0.999642	no	1.21687	1.00467	1.17298	0	0.312354	1.35155
ENSMUSG00000093587	Gm20554	13:72626173-72627013	OK	0.418785	0.154308	-1.44039	-1.56586	0.02735	0.30523	no	0.478883	0.446062	0.33141	0.190512	0.113467	0.122742
ENSMUSG00000082815	Gm5678	16:93628096-93630451	OK	1.45168	0.535021	-1.44005	-2.77348	5e-05	0.002075	yes	0.797124	2.00068	1.55723	0	1.11308	1.027
ENSMUSG00000058385	Hist1h2bg	13:23571407-23571884	OK	1.03415	0.381861	-1.43732	-1.51511	0.00695	0.119452	no	0.684522	1.97803	0.439885	0.354017	0.439267	0.380141
ENSMUSG00000105039	Gm42637	5:125238313-125272815	OK	2.48182	0.924995	-1.42388	-3.03466	5e-05	0.002075	yes	2.13302	1.97974	3.33271	0.821947	0.987674	1.06841
ENSMUSG00000073802	Cdkn2b	4:89306288-89311032	OK	0.442608	0.165215	-1.42169	-2.11057	0.0013	0.0339748	yes	0.473393	0.347414	0.507017	0.0816089	0.344288	0.153354
ENSMUSG00000017412	Cacnb4	2:52425011-52676831	OK	0.519502	0.194337	-1.41857	-1.09239	0.01665	0.219655	no	0.150016	0.364253	1.04424	0.149874	0.223186	0.254414
ENSMUSG00000083159	Gm12180	11:48568354-48569015	OK	0.287635	0.107721	-1.41694	-1.10969	0.14875	0.772126	no	0.204884	0.394696	0.263324	0.105961	0.105182	0.11378
ENSMUSG00000101751	Gm2427	1:85501089-85550577	OK	0.281596	0.105714	-1.41346	-1.26539	0.356	0.999642	no	0	0.533405	0.311382	0	0	0.422856
ENSMUSG00000081404	Gm15694	16:31962505-32003287	OK	0.928206	0.348948	-1.41143	-0.400135	0.57705	0.999642	no	1.08755	0.299316	1.39775	0	1.39579	0
ENSMUSG00000020251	Glt8d2	10:82629827-82690650	OK	2.21082	0.837929	-1.39968	-0.959972	0.00935	0.149356	no	1.51193	3.43224	1.6883	0.594123	1.33445	0.829015
ENSMUSG00000027861	Casq2	3:102086414-102146514	OK	0.333301	0.126448	-1.39828	-0.945914	0.0443	0.417395	no	0.362451	0.181535	0.455916	0.0779925	0.278473	0.071335
ENSMUSG00000100210	Hist1h3f	13:23544464-23545312	OK	0.823024	0.313853	-1.39084	-2.07836	0.0008	0.0233044	yes	0.472947	1.48179	0.514332	0.301041	0.410888	0.242442
ENSMUSG00000038765	Lmx1b	2:33560964-33640511	OK	2.75356	1.05272	-1.38717	-2.84156	5e-05	0.002075	yes	2.71343	2.81277	2.73449	1.14775	0.797535	1.11786
ENSMUSG00000034762	Glis1	4:107434571-107635061	OK	1.00278	0.383618	-1.38627	-1.18797	0.011	0.166685	no	0.842103	1.06243	1.10382	0.258191	0.249737	0.768355
ENSMUSG00000020871	Dlx4	11:95140446-95159047	OK	1.05146	0.402894	-1.38392	-2.4098	5e-05	0.002075	yes	1.24198	1.04714	0.865267	0.440276	0.350462	0.380564
ENSMUSG00000065124	Snora65	2:32876113-32965345	OK	11.2723	4.35377	-1.37244	-0.153635	0.56655	0.999642	no	12.0132	0	21.8037	7.65278	0	2.10954
ENSMUSG00000107076	Gm43480	5:134237833-134314760	OK	0.451012	0.174473	-1.37016	-0.100148	0.50215	0.999642	no	0	0.363307	0.989729	0.11379	0.225936	0.244376
ENSMUSG00000101838	Gm18800	1:53297094-53352752	OK	0.567923	0.219731	-1.36996	-0.264702	0.459	0.999642	no	0.197794	0.723321	0.782653	0	0.207488	0.671436
ENSMUSG00000099988	1700054A03Rik	19:53076217-53084392	OK	0.269531	0.104327	-1.36933	-0.889051	0.09875	0.650859	no	0.335902	0.184883	0.287808	0.0579052	0.114961	0.186538
ENSMUSG00000051627	Hist1h1e	13:23621754-23622502	OK	1.19186	0.463414	-1.36284	-2.21594	0.0002	0.00702851	yes	0.731863	2.51173	0.331982	0.356236	0.663031	0.478154
ENSMUSG00000055833	1700034H15Rik	1:191886129-191913247	OK	0.522769	0.204528	-1.35387	-0.802291	0.063	0.515389	no	0.405081	0.953968	0.209257	0.227667	0.184758	0.178019
ENSMUSG00000057191	AB124611	9:21526175-21545333	OK	0.314578	0.123333	-1.35086	-1.50003	0.00505	0.0951093	no	0.166795	0.350125	0.426813	0.0657943	0.220441	0.141302
ENSMUSG00000048126	Col6a3	1:90765922-90843971	OK	1.74923	0.687177	-1.34797	-1.47942	0.00325	0.0682087	no	1.67919	2.04736	1.52115	0.2346	1.4613	0.818206
ENSMUSG00000020053	Igf1	10:87826376-87937042	OK	38.7478	15.2494	-1.34536	-3.82436	5e-05	0.002075	yes	34.5753	37.0549	44.6131	11.7187	17.7617	19.7985
ENSMUSG00000061991	Hist1h2af	13:23533905-23534304	OK	0.485658	0.19156	-1.34214	-1.12687	0.1658	0.813099	no	0.119496	1.1839	0.153581	0	0.368076	0.398165
ENSMUSG00000038370	Pcp4l1	1:171173261-171196268	OK	2.63614	1.04052	-1.34113	-3.78459	5e-05	0.002075	yes	2.75054	2.76455	2.39332	0.954227	0.982294	1.27132
ENSMUSG00000053472	Gm13534	2:58108059-58108572	OK	0.542554	0.214441	-1.33918	-1.16687	0.09315	0.633152	no	0.37821	0.666146	0.583306	0.23472	0.388325	0
ENSMUSG00000057722	Lepr	4:101717403-101815352	OK	2.3184	0.923009	-1.32871	-1.08974	0.05245	0.466012	no	1.77098	3.03081	2.15342	0.699616	0.755816	1.53699
ENSMUSG00000103953	Gm29718	1:136793033-136793510	OK	1.96832	0.784041	-1.32796	-2.48902	0.0058	0.104584	no	0	2.82576	3.0792	0	0	3.13616
ENSMUSG00000072476	Gm9008	6:76495431-76497784	OK	3.36735	1.34403	-1.32505	-3.55911	5e-05	0.002075	yes	0.12011	5.42101	4.56092	0.0903533	0.089689	5.10572
ENSMUSG00000101501	Rps27a-ps1	1:52522238-52522701	OK	0.541408	0.216208	-1.3243	-0.939218	0.05835	0.49348	no	0.631156	0.297767	0.6953	0.0932621	0.277729	0.400577
ENSMUSG00000086438	Asb17os	3:153836901-153855082	OK	0.903684	0.361867	-1.32036	-1.07596	0.0498	0.45071	no	0.640197	1.1452	0.925652	0.24832	0.328659	0.622169
ENSMUSG00000109905	RP23-198F6.2	7:139774713-139775179	OK	0.346786	0.139493	-1.31386	-0.703112	0.18285	0.851221	no	0.713106	0.0981252	0.229127	0.0922	0.274566	0.0990038
ENSMUSG00000004341	Gpx6	13:21312216-21319624	OK	1.22678	0.493493	-1.31377	-2.42331	5e-05	0.002075	yes	0.969513	0.943159	1.76765	0.583031	0.532445	0.275464
ENSMUSG00000095588	Gm12350	4:34485831-34486293	OK	0.364301	0.146997	-1.30934	-0.915804	0.1939	0.86862	no	0.362051	0.498191	0.23266	0	0.185867	0.402121
ENSMUSG00000086552	Dlx4os	11:95140446-95159047	OK	2.22012	0.896093	-1.30892	-3.18219	5e-05	0.002075	yes	2.31365	2.1578	2.18889	0.947278	0.940313	0.749502
ENSMUSG00000023078	Cxcl13	5:95956950-95961068	OK	6.54674	2.64694	-1.30645	-4.20967	5e-05	0.002075	yes	7.33602	6.4114	5.89281	1.69192	3.12994	4.07397
ENSMUSG00000079962	Gm12643	4:91037899-91038273	OK	0.354262	0.14327	-1.30608	-0.858994	0.14435	0.762709	no	0.410231	0.30106	0.351495	0	0.421201	0.151878
ENSMUSG00000029359	Tesc	5:118027742-118061878	OK	0.528879	0.213983	-1.30544	-1.09246	0.00435	0.0847275	no	0.545693	0.348653	0.692293	0.0613696	0.330599	0.402593
ENSMUSG00000045842	Tgif2-ps2	17:40115357-40116068	OK	0.268799	0.108806	-1.30477	-0.912698	0.0604	0.504361	no	0.323286	0.30504	0.178071	0.0477701	0.237094	0.10259
ENSMUSG00000026644	Acbd7	2:3336167-3340993	OK	0.457535	0.185565	-1.30196	-0.957503	0.07875	0.576558	no	0.57197	0.157409	0.643225	0.147904	0.367041	0.0794091
ENSMUSG00000031384	Asb9	X:164506326-164539752	OK	1.02144	0.415486	-1.29773	-2.46192	5e-05	0.002075	yes	0.827474	0.883297	1.35354	0.285299	0.617893	0.473453
ENSMUSG00000018986	Slfn3	11:83191329-83215154	OK	0.820397	0.334005	-1.29645	-2.69587	5e-05	0.002075	yes	0.596688	0.817052	1.04745	0.225799	0.254024	0.630399
ENSMUSG00000060981	Hist1h4h	13:23531049-23531522	OK	1.61586	0.658441	-1.29518	-1.76745	0.0019	0.0451544	yes	0.434154	3.63224	0.781186	0.80832	0.534918	0.482205
ENSMUSG00000086284	Frmpd1os	4:45184874-45285936	OK	0.853737	0.348712	-1.29176	-0.680826	0.20885	0.890639	no	0.552639	0.730027	1.27854	0.343032	0.34046	0.368322
ENSMUSG00000071847	Apcdd1	18:62922326-62953195	OK	17.1208	7.00272	-1.28976	-6.56177	5e-05	0.002075	yes	14.3441	17.6885	19.3299	6.17379	7.89734	7.76595
ENSMUSG00000083626	Gm4459	7:139600950-139683817	OK	0.336945	0.138442	-1.28323	-0.7301	0.2771	0.959431	no	0.442333	0	0.568501	0.0915063	0.272499	0.0982578
ENSMUSG00000095524	Gm15682	5:88720854-88764220	OK	0.370558	0.152529	-1.28061	-0.243799	0.55725	0.999642	no	0.251203	0.645236	0.215237	0.0866105	0.343895	0.0930018
ENSMUSG00000067719	Gm10221	5:24581553-24581862	OK	3.46542	1.43042	-1.27659	-1.70156	0.0051	0.0957235	no	2.79079	2.36319	5.24226	0.888198	1.3225	2.62279
ENSMUSG00000060093	Hist1h4a	13:23760691-23761230	OK	0.797028	0.329136	-1.27595	-1.31393	0.02295	0.273102	no	0.418776	1.61349	0.358817	0.21658	0.573301	0.310083
ENSMUSG00000091383	Hist1h2al	13:51202687-51203065	OK	2.96218	1.23198	-1.26568	-1.90493	0.00155	0.0386727	yes	1.87136	5.29722	1.71795	0.829558	1.78416	1.48462
ENSMUSG00000086096	Gm12688	4:99653606-99654983	OK	0.880317	0.368343	-1.25697	-1.81382	0.0025	0.0561803	no	0.989318	0.62232	1.02931	0.438556	0.386962	0.209297
ENSMUSG00000037005	Xpnpep2	X:48108724-48136981	OK	1.47978	0.620948	-1.25284	-1.40634	0.00595	0.106475	no	1.33847	1.24732	1.85355	0.405125	1.05702	0.61652
ENSMUSG00000098973	Mir6236	9:110281286-110281409	OK	22.5488	9.52666	-1.24301	-1.50606	0.21995	0.898239	no	9.22727	40.6303	17.7888	14.3163	9.47404	0
ENSMUSG00000022096	Hr	14:70552211-70573548	OK	0.632562	0.267546	-1.24142	-1.51126	5e-05	0.002075	yes	0.706006	0.483539	0.708143	0.238997	0.291146	0.301045
ENSMUSG00000035431	Sstr1	12:58211771-58214444	OK	0.288801	0.122271	-1.23999	-1.77857	0.0014	0.03574	yes	0.212512	0.2836	0.370291	0.0804473	0.159712	0.168478
ENSMUSG00000033508	Asprv1	6:86628163-86629710	OK	0.756035	0.321409	-1.23404	-2.45007	5e-05	0.002075	yes	0.838334	0.576784	0.852985	0.270978	0.394512	0.349169
ENSMUSG00000057454	Lypd3	7:24631144-24641118	OK	0.674053	0.28708	-1.23141	-2.32345	0.00025	0.00851392	yes	0.422075	0.661203	0.938882	0.201495	0.366692	0.378637
ENSMUSG00000069273	Hist1h3e	13:23561533-23562369	OK	1.1477	0.488982	-1.23089	-2.19111	0.00045	0.0142116	yes	1.00088	1.63229	0.809936	0.421773	0.494795	0.617587
ENSMUSG00000027719	Adad1	3:37063526-37125959	OK	0.550589	0.235413	-1.22578	-0.833084	0.0516	0.461189	no	0.171258	0.928555	0.551955	0.103916	0.373184	0.360634
ENSMUSG00000064672	Gm22806	13:51645231-51650660	OK	6.02854	2.58169	-1.2235	-1.07988	0.58615	0.999642	no	0	13.9995	4.08617	0	3.26435	7.0624
ENSMUSG00000019876	Pkib	10:57631980-57741112	OK	1.55	0.666414	-1.21778	-1.15617	0.01245	0.182464	no	2.55466	1.22797	0.867375	0.402179	1.13325	0.728045
ENSMUSG00000074577	Fam65c	2:167980163-168011506	OK	0.754918	0.324751	-1.21699	-1.83186	0.00025	0.00851392	yes	0.856034	0.567214	0.841505	0.222923	0.361973	0.491185
ENSMUSG00000106237	Gm8066	5:137483019-137540718	OK	1.21091	0.523931	-1.20864	-0.189779	0.4251	0.999642	no	1.49655	1.28133	0.854849	0.344009	0.853649	0.554059
ENSMUSG00000073821	8030451A03Rik	4:63959784-64149924	OK	0.65725	0.285299	-1.20397	-0.699445	0.22825	0.91019	no	0.590191	0.773842	0.607717	0.143099	0.517459	0.337539
ENSMUSG00000054545	Ugt1a6a	1:88055387-88220002	OK	0.277594	0.120995	-1.19802	-0.703453	0.1412	0.7577	no	0.309218	0.119847	0.403717	0.129099	0.143551	0.0822323
ENSMUSG00000047171	Helt	8:46292038-46294671	OK	0.677852	0.296719	-1.19187	-1.21887	0.01755	0.226641	no	0.840156	0.715197	0.478202	0.145169	0.381498	0.515041
ENSMUSG00000063543	Gm5616	9:48450399-48450786	OK	0.465341	0.203933	-1.19019	-0.844397	0.2065	0.885912	no	0.508859	0.560162	0.327001	0	0.39185	0.423883
ENSMUSG00000089902	Gm13625	2:69861561-69885615	OK	0.356272	0.156277	-1.18888	-0.0820234	0.4297	0.999642	no	0.33856	0.186347	0.54391	0.175094	0.0869035	0.188015
ENSMUSG00000094002	Gm9866	12:27140795-27160633	OK	0.460658	0.203154	-1.18113	-0.682237	0.03985	0.392722	no	0.405767	0.363959	0.612249	0.171046	0.186764	0.283758
ENSMUSG00000026815	Gfi1b	2:28609449-28621982	OK	1.72756	0.762037	-1.1808	-0.992273	0.0463	0.429386	no	0.899218	1.23157	3.05189	0.617204	0.814511	0.999229
ENSMUSG00000038725	Pkhd1l1	15:44457552-44601369	OK	0.426648	0.188391	-1.17932	-0.740484	0.1571	0.793038	no	0.242458	0.488763	0.548724	0.223943	0.0911598	0.214519
ENSMUSG00000086224	2700069I18Rik	3:5177585-5415857	OK	6.31761	2.7896	-1.17932	-1.15722	0.02955	0.321315	no	5.30817	6.48241	7.16226	1.99071	3.53487	3.6421
ENSMUSG00000086451	4933431K23Rik	8:77610859-77769682	OK	0.26197	0.115678	-1.17928	-0.555783	0.34985	0.999642	no	0.238792	0.281946	0.265173	0.0928465	0.105303	0.171718
ENSMUSG00000095789	Nupr1l	5:129908539-129913789	OK	2.66181	1.17747	-1.17671	-1.43517	0.00735	0.125284	no	2.91621	2.1605	2.90871	1.06868	1.50204	1.07049
ENSMUSG00000041120	Nbl1	4:139082283-139092993	OK	45.9741	20.4237	-1.17058	-5.65547	5e-05	0.002075	yes	43.6539	42.4455	51.8229	15.2322	25.3372	25.8932
ENSMUSG00000032011	Thy1	9:44043383-44048579	OK	0.746761	0.332158	-1.16878	-2.34536	5e-05	0.002075	yes	0.429033	0.708433	1.10282	0.174338	0.503437	0.476517
ENSMUSG00000028661	Epha8	4:136929418-136956816	OK	0.486907	0.217008	-1.1659	-2.90725	5e-05	0.002075	yes	0.530999	0.401151	0.52857	0.17231	0.245874	0.277538
ENSMUSG00000030218	Mgp	6:136872434-136875823	OK	1.18211	0.527723	-1.16352	-1.7513	0.00295	0.0631155	no	1.00903	1.37218	1.16513	0.234422	0.698095	0.943952
ENSMUSG00000060680	Gm8894	14:55420268-55420724	OK	0.54621	0.244019	-1.16246	-0.860755	0.11175	0.684381	no	0.277967	0.407989	0.952674	0.0958383	0.475668	0.308732
ENSMUSG00000018845	Unc45b	11:82910549-82962941	OK	0.332268	0.148543	-1.16147	-0.613835	0.1559	0.790848	no	0.313036	0.174525	0.509243	0.0809253	0.108002	0.32432
ENSMUSG00000045410	Akr1e1	13:4590756-4609174	OK	13.5507	6.05798	-1.16146	-2.82917	5e-05	0.002075	yes	6.07031	7.46719	27.1147	4.82689	4.3907	10.1874
ENSMUSG00000027868	Tbx15	3:99240380-99354259	OK	3.03261	1.35701	-1.16013	-2.47656	5e-05	0.002075	yes	1.68247	3.41581	3.99956	1.06148	1.69959	1.60548
ENSMUSG00000108207	1810059H22Rik	5:148871583-149015813	OK	0.733949	0.329322	-1.15618	-0.521053	0.2104	0.892731	no	0.651807	0.554777	0.995263	0.334706	0.286642	0.361234
ENSMUSG00000085218	BB218582	2:106642913-106650364	OK	1.78057	0.800041	-1.15419	-1.03011	0.0353	0.359685	no	2.28047	1.59094	1.47031	0.550093	0.861785	1.2382
ENSMUSG00000080186	Gm14448	X:5885742-5885952	OK	5.55002	2.49391	-1.15409	-1.04237	0.05895	0.497028	no	2.73247	6.01591	7.90168	2.82632	2.80554	1.51744
ENSMUSG00000060177	Klk1b22	7:44112672-44116922	OK	1.05589	0.475465	-1.15104	-1.99611	0.00085	0.024374	yes	1.00773	1.18856	0.971372	0.558396	0.665148	0.11992
ENSMUSG00000040113	Mettl11b	1:163702255-163725232	OK	0.320116	0.144597	-1.14656	-1.56011	0.00445	0.0859657	no	0.259926	0.358227	0.342195	0.146917	0.136693	0.147859
ENSMUSG00000052565	Hist1h1d	13:23555086-23555830	OK	1.10493	0.500729	-1.14186	-1.88637	0.0012	0.0321238	yes	0.824007	2.10061	0.390173	0.493443	0.534343	0.481687
ENSMUSG00000061615	Hist1h2ab	13:23751125-23751598	OK	0.707718	0.321476	-1.13846	-1.11471	0.0484	0.440939	no	0.434154	1.24261	0.446392	0.0898133	0.624071	0.482205
ENSMUSG00000065899	Gm24523	15:34440504-34443640	OK	16.5	7.49607	-1.13826	-0.153494	0.5731	0.999642	no	24.6936	16.7722	8.03421	3.54395	10.1365	12.7599
ENSMUSG00000097971	Gm26917	17:39843012-39846341	OK	16.2562	7.38602	-1.13812	-4.20253	5e-05	0.002075	yes	6.45493	36.5023	5.81122	7.06922	9.63749	5.76817
ENSMUSG00000074529	Zfp972	2:177897095-177925613	OK	0.432068	0.196459	-1.13703	-0.612972	0.2195	0.898239	no	0.131024	0.0721168	1.09306	0.157909	0.178968	0.29105
ENSMUSG00000083482	Gm14706	X:76919855-76920110	OK	0.625601	0.284735	-1.13562	-0.82333	0.49045	0.999642	no	1.47177	0.405037	0	0.380579	0.377781	0
ENSMUSG00000028716	Pdzk1ip1	4:115088707-115093899	OK	5.19639	2.3662	-1.13494	-2.58072	5e-05	0.002075	yes	2.74962	5.45927	7.38028	2.07154	3.06902	2.25269
ENSMUSG00000074203	G430095P16Rik	8:84699875-84800344	OK	1.91869	0.874361	-1.13382	-1.19372	0.0418	0.403749	no	1.3588	2.59269	1.80457	0.515346	1.20911	1.25764
ENSMUSG00000035202	Lars2	9:123366939-123462664	OK	99.068	45.1545	-1.13355	-5.33544	5e-05	0.002075	yes	30.2444	232.437	34.5229	58.2747	30.4699	33.5988
ENSMUSG00000099465	Gm3830	8:105164586-105170367	OK	0.472543	0.215385	-1.13353	-1.99098	0.00055	0.0170438	yes	0.434707	0.68362	0.299303	0.160585	0.35069	0.189679
ENSMUSG00000084708	Gm22988	11:69666935-69672423	OK	11.096	5.06261	-1.13208	-0.0726085	0.6194	0.999642	no	0	9.51311	23.7748	0	6.04202	14.2084
ENSMUSG00000053886	Sh2d4a	8:68276566-68347699	OK	0.27065	0.12365	-1.13017	-1.71067	0.00095	0.0265952	yes	0.25205	0.295961	0.26394	0.0868994	0.134181	0.186621
ENSMUSG00000085700	Hbb-bh0	7:103850019-103850148	OK	19.5	8.92781	-1.1271	-9.03086	0.09785	0.647654	no	3.86456	0	54.6355	0	35.7112	0
ENSMUSG00000009654	Oit3	10:59422957-59441778	OK	0.323487	0.148104	-1.12709	-0.987403	0.0219	0.264031	no	0.327682	0.233697	0.409081	0.106251	0.143822	0.236094
ENSMUSG00000098898	Gm27754	10:26274467-26375185	OK	4.76015	2.18114	-1.12592	-0.208359	0.58715	0.999642	no	4.21743	4.64263	5.42038	4.36229	0	0
ENSMUSG00000086843	E030013I19Rik	2:12106631-12312315	OK	0.530462	0.243582	-1.12284	-1.12827	0.04505	0.421104	no	0.539137	0.522953	0.529294	0.204191	0.236235	0.329712
ENSMUSG00000096351	Samd11	4:156236009-156255338	OK	0.269096	0.124029	-1.11744	-0.402869	0.6479	0.999642	no	0.25433	0.301507	0.25145	0.0607074	0.20087	0.173832
ENSMUSG00000026253	Chrng	1:87204656-87212694	OK	0.299129	0.137927	-1.11686	-0.585266	0.0709	0.547734	no	0.466741	0.299637	0.131009	0.0962574	0.102915	0.256279
ENSMUSG00000074206	Adh6b	3:138341774-138358861	OK	0.425174	0.196627	-1.11259	-1.87023	0.0011	0.029932	yes	0.542931	0.269061	0.463529	0.253113	0.193201	0.0870811
ENSMUSG00000048776	Pthlh	6:147252100-147264183	OK	0.604473	0.279681	-1.1119	-1.85984	0.00125	0.0331933	yes	0.611594	0.553741	0.648083	0.202689	0.447543	0.2658
ENSMUSG00000069268	Hist1h2bf	13:23573735-23574196	OK	0.87901	0.406719	-1.11185	-1.15389	0.02775	0.308236	no	0.636041	1.30031	0.700681	0.187968	0.746344	0.504597
ENSMUSG00000092819	Gm23639	18:33794891-33795986	OK	26.1845	12.1212	-1.11118	-0.463778	0.4984	0.999642	no	28.3946	27.3502	22.8086	14.685	7.2885	11.8265
ENSMUSG00000020524	Gria1	11:57011386-57330244	OK	0.699369	0.323782	-1.11103	-1.23223	0.0042	0.0822911	no	0.594822	0.565993	0.937291	0.220203	0.410578	0.444144
ENSMUSG00000007805	Twist2	1:91798527-91848028	OK	29.6427	13.7336	-1.10997	-5.39679	5e-05	0.002075	yes	31.8101	27.5842	29.5339	12.1905	15.0324	15.521
ENSMUSG00000017607	Tns4	11:99065677-99089306	OK	1.04645	0.484861	-1.10985	-1.57584	0.00085	0.024374	yes	1.03243	0.71541	1.3915	0.43747	0.606016	0.458486
ENSMUSG00000103668	Gm38186	3:59002470-59351167	OK	0.316792	0.147122	-1.10652	-0.276574	0.62585	0.999642	no	0.285863	0.419579	0.244934	0.0985712	0.391346	0
ENSMUSG00000030762	Aqp8	7:123462290-123468004	OK	0.600305	0.279889	-1.10084	-1.94022	0.00045	0.0142116	yes	0.564269	0.696243	0.540401	0.208106	0.337862	0.365484
ENSMUSG00000091243	Vgll3	16:65815632-65863057	OK	2.15457	1.00563	-1.0993	-3.75432	5e-05	0.002075	yes	2.05494	1.80638	2.60238	0.981011	0.873327	1.18717
ENSMUSG00000092572	Serpinb10	1:107511422-107549271	OK	0.257573	0.120467	-1.09635	-0.856757	0.08995	0.621894	no	0.161672	0.316282	0.294766	0.0806671	0.0717572	0.248775
ENSMUSG00000107333	Gm43008	3:39217560-39217846	OK	0.89405	0.418735	-1.09432	-0.583299	0.21825	0.897699	no	0.792117	0.871978	1.01806	0.273108	0.5422	0.586524
ENSMUSG00000055385	Rnf212	5:108729289-108774982	OK	0.477552	0.223722	-1.09395	-0.485469	0.195	0.869316	no	0.216605	0.724615	0.491435	0.267888	0.069236	0.289876
ENSMUSG00000046318	Ccbe1	18:66045301-66319607	OK	1.39956	0.655962	-1.09329	-3.38106	5e-05	0.002075	yes	1.436	1.34697	1.4157	0.647478	0.642873	0.686018
ENSMUSG00000096243	Gm24265	5:115489458-115489599	OK	6.13082	2.88031	-1.08986	-5.41408	0.1484	0.771832	no	0	18.3925	0	5.76061	0	0
ENSMUSG00000085730	Gm13307	4:41893277-41943124	OK	1.20037	0.564189	-1.08923	-0.85177	0.138	0.749538	no	0.485107	1.86905	1.24695	0.585398	0.996161	0.0897995
ENSMUSG00000026885	Ttll11	2:35751240-35979913	OK	1.09799	0.516479	-1.08808	-1.10081	0.01675	0.220446	no	0.614622	1.69604	0.983308	0.546595	0.568487	0.404237
ENSMUSG00000031736	Crnde	8:92326032-92356120	OK	10.4774	4.95073	-1.08157	-3.0307	5e-05	0.002075	yes	7.96052	11.7155	11.7562	4.99923	5.13173	4.67274
ENSMUSG00000049353	Rd3	1:191977369-191990122	OK	0.300833	0.142208	-1.08096	-1.28933	0.0151	0.207321	no	0.376823	0.215705	0.309972	0.124755	0.20216	0.117164
ENSMUSG00000094338	Hist1h2bl	13:21715762-21716143	OK	1.25472	0.593902	-1.07907	-1.11041	0.0342	0.35239	no	1.18303	1.73641	0.844708	0.271926	0.809781	1.02197
ENSMUSG00000051998	Lax1	1:133679090-133690108	OK	0.361426	0.171101	-1.07885	-1.4961	0.00225	0.0516874	no	0.220878	0.404945	0.458456	0.126831	0.183125	0.247619
ENSMUSG00000097910	5033428I22Rik	8:57331691-57354580	OK	3.47605	1.6466	-1.07796	-2.64224	5e-05	0.002075	yes	3.30717	3.55619	3.56478	1.31853	1.7919	2.15744
ENSMUSG00000061816	Myl1	1:66924294-66945404	OK	0.755525	0.358921	-1.07381	-0.988968	0.01105	0.166983	no	0.592394	0.848266	0.825914	0.199543	0.594596	0.442
ENSMUSG00000040536	Necab1	4:14929907-15149794	OK	0.348258	0.165473	-1.07356	-1.28555	0.00295	0.0631155	no	0.388507	0.240612	0.415655	0.154386	0.209444	0.143676
ENSMUSG00000075588	Hoxb2	11:96323325-96354691	OK	0.437966	0.208114	-1.07345	-1.55667	0.0064	0.112696	no	0.69076	0.403645	0.219493	0.283847	0.118394	0.146368
ENSMUSG00000086746	Gm15222	14:46379413-46390669	OK	2.44973	1.16677	-1.0701	-0.499375	0.437	0.999642	no	2.14376	3.08602	2.11941	0.852844	1.86246	1.09893
ENSMUSG00000086854	Gm13781	6:30568368-30592418	OK	1.34317	0.639753	-1.07006	-0.80107	0.1351	0.741591	no	1.37922	1.60758	1.04272	0.839172	0.249901	0.630768
ENSMUSG00000037335	Hand1	11:57828704-57832818	OK	11.2585	5.36378	-1.06969	-1.92432	0.00015	0.00546921	yes	12.2269	14.2573	7.29133	6.60523	4.06878	4.17589
ENSMUSG00000025328	Padi3	4:140785364-140810648	OK	0.491197	0.234068	-1.06937	-2.3635	5e-05	0.002075	yes	0.5319	0.46842	0.473272	0.270852	0.17644	0.21813
ENSMUSG00000097316	Gm10516	1:191997204-192151026	OK	0.638519	0.304456	-1.0685	-0.382143	0.29875	0.975188	no	0.681621	0.735832	0.498105	0.400872	0.199871	0.21621
ENSMUSG00000035189	Ano4	10:88948993-89344762	OK	0.466076	0.222288	-1.06814	-0.75527	0.0478	0.436919	no	0.164482	0.449295	0.784451	0.121105	0.470874	0.176067
ENSMUSG00000098543	Gm27533	19:5824707-5845478	OK	2.97051	1.42349	-1.06128	-0.267215	0.6509	0.999642	no	1.52971	7.38183	0	0.715884	2.74244	1.51974
ENSMUSG00000031737	Irx5	8:92357624-92376286	OK	8.39671	4.02936	-1.05927	-4.70282	5e-05	0.002075	yes	8.62992	7.97032	8.58989	3.45814	4.66393	4.53723
ENSMUSG00000034584	Exph5	9:53301669-53377514	OK	0.607874	0.292246	-1.05659	-2.92115	5e-05	0.002075	yes	0.50077	0.633494	0.689358	0.30694	0.30584	0.249264
ENSMUSG00000083596	Rpl21-ps15	X:151198077-151471842	OK	0.455031	0.219433	-1.05219	-0.260537	0.61765	0.999642	no	0.334938	0.276644	0.753511	0.25989	0.171947	0.186004
ENSMUSG00000110264	RP23-15B11.3	8:47135650-47163704	OK	0.314876	0.151865	-1.05199	-1.4725	0.00975	0.153518	no	0.298377	0.262768	0.383484	0.12345	0.183814	0.176747
ENSMUSG00000052305	Hbb-bs	7:103826533-103828096	OK	58.7421	28.3434	-1.05138	-4.83551	5e-05	0.002075	yes	31.2879	62.1889	82.7493	21.5416	45.2789	25.0116
ENSMUSG00000030553	Pgpep1l	7:68236609-68264233	OK	0.31413	0.151717	-1.04998	-0.777105	0.0684	0.536195	no	0.303358	0.448182	0.19085	0.15358	0.160696	0.139013
ENSMUSG00000090500	Gm17057	15:99734880-99875428	OK	1.71984	0.830756	-1.04978	-0.289335	0.5962	0.999642	no	1.75311	1.46403	1.94237	0.625284	0.93103	1.14142
ENSMUSG00000073876	Gm13305	4:42158841-42168603	OK	19.3458	9.35716	-1.04788	-3.33956	5e-05	0.002075	yes	19.4822	15.9357	22.6195	11.9254	13.2301	0.347729
ENSMUSG00000046057	Gm15428	1:156793511-156793844	OK	2.11211	1.02414	-1.04427	-1.21251	0.0294	0.320105	no	2.31544	1.96067	2.06022	0.921141	1.46299	0.791292
ENSMUSG00000087353	Gm13727	2:77879752-77946375	OK	0.421844	0.204819	-1.04236	-0.105387	0.55025	0.999642	no	0.873303	0.255939	0.13629	0.119315	0.108879	0.471765
ENSMUSG00000047026	Acsm4	7:119690025-119714565	OK	0.444641	0.216269	-1.03981	-1.91238	0.0017	0.0416601	yes	0.385439	0.344743	0.603743	0.0747521	0.247342	0.468232
ENSMUSG00000092730	Snora24	3:123507551-123508404	OK	15.3189	7.45147	-1.03971	-0.262597	0.69415	0.999642	no	19.1843	16.5063	10.2661	2.81821	12.9161	11.2534
ENSMUSG00000081564	Gm13717	6:29735502-29761365	OK	1.39884	0.680469	-1.03964	-0.150898	0.47945	0.999642	no	1.15346	1.74591	1.29716	0.596541	0.888232	0.640562
ENSMUSG00000069274	Hist1h4f	13:23551257-23551648	OK	1.6597	0.80913	-1.03648	-1.27012	0.02155	0.261337	no	0.249073	4.24986	0.480175	1.28814	0.383601	0.276639
ENSMUSG00000085890	Tnfsf13os	11:69682137-69696098	OK	0.572719	0.279853	-1.03316	-0.52384	0.37385	0.999642	no	0.701141	0.279372	0.737646	0.460754	0.128436	0.0694685
ENSMUSG00000027859	Ngf	3:102469918-102521013	OK	1.66553	0.815106	-1.03092	-1.7843	0.0022	0.0506798	no	1.40221	1.58053	2.01385	0.649255	0.892541	1.06937
ENSMUSG00000020467	Efemp1	11:28853203-28926743	OK	3.88055	1.90184	-1.02886	-3.04043	5e-05	0.002075	yes	3.26581	4.30431	4.07153	1.71698	2.24057	1.93285
ENSMUSG00000021567	Nkd2	13:73818533-73847631	OK	11.3548	5.57858	-1.02533	-5.12101	5e-05	0.002075	yes	10.9666	11.4484	11.6493	5.33095	5.95616	5.69625
ENSMUSG00000075225	Gm29096	10:41538845-41716634	OK	0.255944	0.125776	-1.02497	-0.866776	0.02065	0.253966	no	0.14694	0.254745	0.366148	0.122323	0.175992	0.0824676
ENSMUSG00000091697	Eif3s6-ps2	18:90311824-90312043	OK	76.5875	37.6439	-1.02469	-2.74552	5e-05	0.002075	yes	82.0473	121.735	25.9804	23.9837	69.5908	33.0174
ENSMUSG00000024922	Ovol1	19:5512527-5560575	OK	0.535595	0.263364	-1.02408	-2.15252	0.0002	0.00702851	yes	0.478768	0.479125	0.648892	0.252108	0.259192	0.290049
ENSMUSG00000075296	Aldh3b2	19:3972327-3981645	OK	0.343325	0.168835	-1.02396	-1.78606	0.00115	0.0310368	yes	0.169586	0.440041	0.420348	0.20047	0.0994981	0.174902
ENSMUSG00000083457	Cyp4b1-ps2	4:115582285-115583144	OK	2.38326	1.17251	-1.02334	-1.28729	0.01435	0.20258	no	1.06866	1.96067	4.12044	0.921141	1.46299	1.38476
ENSMUSG00000093826	Gm6900	7:10656478-10656820	OK	1.17046	0.576641	-1.02133	-0.893313	0.07555	0.563877	no	0.16717	1.84024	1.50396	0.345823	0.686561	0.928357
ENSMUSG00000088990	Gm22767	4:132826928-132843169	OK	3.41819	1.68496	-1.02052	-0.505679	0.65455	0.999642	no	1.57663	8.67793	0	0	3.23759	3.50225
ENSMUSG00000039062	Anpep	7:79821802-79861059	OK	4.1063	2.02628	-1.019	-2.35165	0.00015	0.00546921	yes	3.19705	5.14968	3.97217	1.93484	2.24899	1.98646
ENSMUSG00000097615	Gm2061	1:185447115-185468762	OK	0.726332	0.359178	-1.01593	-1.52361	0.00515	0.0962246	no	0.440535	0.74763	0.990832	0.294284	0.34866	0.499485
ENSMUSG00000031734	Irx3	8:91798524-91807539	OK	17.8262	8.83599	-1.01254	-5.31637	5e-05	0.002075	yes	17.9679	19.2202	16.2906	7.796	11.1395	8.61246
ENSMUSG00000039457	Ppl	16:5086290-5132481	OK	0.823488	0.408479	-1.01149	-3.23644	5e-05	0.002075	yes	0.776966	0.834023	0.859476	0.367841	0.408794	0.489438
ENSMUSG00000009471	Myod1	7:46376473-46379099	OK	0.603218	0.300383	-1.00588	-1.97962	0.0012	0.0321238	yes	0.580497	0.592265	0.636893	0.117158	0.479725	0.48749
ENSMUSG00000086975	Gm15208	12:107744135-107784041	OK	0.478258	0.238773	-1.00215	-0.790786	0.1883	0.860822	no	0.485107	0.534016	0.415651	0.0836282	0.24904	0.538797
ENSMUSG00000004366	Sst	16:23889580-23890844	OK	15.7767	7.88488	-1.00064	-3.24923	5e-05	0.002075	yes	33.2292	5.80314	8.29784	7.84212	7.23711	8.61818
ENSMUSG00000082791	Gm4875	6:117997206-117997992	OK	1.20312	0.601928	-0.999121	-1.56068	0.01235	0.18132	no	0.0402467	0	3.56912	0.0416291	0	2.32445
ENSMUSG00000080951	Gm12208	11:52396427-52408728	OK	1.7576	0.88003	-0.997979	-0.320795	0.62205	0.999642	no	1.6469	3.62589	0	0	1.69095	1.82918
ENSMUSG00000039153	Runx2	17:44495986-45119290	OK	0.849081	0.42539	-0.997117	-0.876507	0.02425	0.283065	no	0.582197	1.15071	0.814341	0.203384	0.52141	0.773383
ENSMUSG00000039883	Lrrc17	5:21483846-21645634	OK	5.16314	2.58988	-0.995361	-3.76011	5e-05	0.002075	yes	5.07049	5.13935	5.27959	2.23269	2.57455	3.3196
ENSMUSG00000101972	Hist1h3i	13:21782959-21783370	OK	0.827866	0.415535	-0.994427	-0.891554	0.10095	0.657489	no	0.788504	1.116	0.579093	0.349538	0.462624	0.500442
ENSMUSG00000026414	Tnnt2	1:135836353-135852260	OK	0.528721	0.265839	-0.991957	-0.846492	0.0042	0.0822911	no	0.25281	0.689474	0.64388	0.190076	0.461845	0.221358
ENSMUSG00000097166	9330179D12Rik	6:127122965-127212411	OK	0.323463	0.162698	-0.991403	-0.0998412	0.38415	0.999642	no	0.32456	0.301559	0.344271	0.107698	0.17529	0.260108
ENSMUSG00000026304	Rab17	1:90958132-90969661	OK	0.409531	0.206257	-0.989533	-1.00231	0.016	0.214159	no	0.586317	0.219047	0.423229	0.17946	0.234969	0.231138
ENSMUSG00000107994	D830050J10Rik	6:115601901-115677780	OK	0.729334	0.367532	-0.988711	-0.318531	0.45585	0.999642	no	0.67171	0.844673	0.67162	0.283994	0.484381	0.417757
ENSMUSG00000037843	Vstm2l	2:157914652-157944719	OK	0.814321	0.410663	-0.987643	-1.88636	0.00165	0.0406762	yes	1.07244	0.512318	0.858207	0.146508	0.810256	0.53938
ENSMUSG00000110619	RP23-457J22.8	8:71520119-71525711	OK	0.720195	0.363732	-0.985511	-1.04928	0.06185	0.510338	no	0.553117	0.659622	0.947846	0.286058	0.473258	0.409556
ENSMUSG00000099583	Hist1h3d	13:23575762-23576322	OK	0.673842	0.340387	-0.985232	-1.0881	0.07285	0.555011	no	0.394171	1.37405	0.253301	0.475662	0.33726	0.0729661
ENSMUSG00000031380	Vegfd	X:164373377-164402650	OK	3.42314	1.73162	-0.983195	-3.30148	5e-05	0.002075	yes	3.25552	3.20577	3.80812	1.39429	2.13225	2.00565
ENSMUSG00000061482	Hist1h4d	13:23581597-23581990	OK	4.98675	2.52379	-0.982506	-1.93302	0.00055	0.0170438	yes	2.34152	9.76772	2.85101	2.67689	2.27761	2.46379
ENSMUSG00000032908	Sgpp2	1:78310344-78488897	OK	3.36464	1.70361	-0.981857	-1.53869	0.0095	0.151022	no	3.37432	3.12945	3.59016	1.38075	2.14473	1.90823
ENSMUSG00000105617	Gm43809	5:31596934-32084962	OK	1.12571	0.570238	-0.981201	-0.208883	0.63425	0.999642	no	1.9946	1.38254	0	0	2.28095	0
ENSMUSG00000054204	Fam150b	12:30884321-30911612	OK	9.67767	4.9066	-0.979937	-1.35082	0.02815	0.311422	no	8.37556	9.6157	11.0418	3.10464	6.80952	6.6076
ENSMUSG00000028264	Spaca1	4:34024873-34050191	OK	0.70268	0.356364	-0.979517	-1.62073	0.00215	0.0499459	yes	0.413407	0.560898	1.13374	0.269981	0.324227	0.561265
ENSMUSG00000100552	Gm29019	15:82982724-82989134	OK	0.9939	0.50524	-0.976133	-0.863825	0.15785	0.794638	no	0.782885	0.500626	1.69819	0.268798	1.4112	0.0721585
ENSMUSG00000108585	Nova2	7:18925887-18965319	OK	0.567666	0.289556	-0.971201	-0.48208	0.4148	0.999642	no	0.654184	0.869258	0.179557	0.051463	0.730068	0.32523
ENSMUSG00000005705	Agrp	8:105566323-105682922	OK	0.378121	0.193364	-0.967532	-0.144285	0.5138	0.999642	no	0.41278	0.251522	0.470061	0.0465956	0.372576	0.307688
ENSMUSG00000029765	Plxna4	6:32144267-32588192	OK	0.735071	0.376003	-0.96714	-3.43693	5e-05	0.002075	yes	0.691021	0.654642	0.859551	0.358336	0.361408	0.425932
ENSMUSG00000065287	Gm24451	2:130274429-130284547	OK	7.34875	3.7625	-0.965807	-0.105757	0.64915	0.999642	no	13.8101	3.79978	4.43632	0	3.54864	11.5014
ENSMUSG00000082350	Gm14008	2:128587894-128588168	OK	1.08135	0.553999	-0.964881	-0.845475	0.33605	0.999642	no	0.893667	1.96753	0.382857	0	1.22342	0.992574
ENSMUSG00000031610	Scrg1	8:57455922-57477585	OK	0.288892	0.148101	-0.963944	-0.853919	0.20125	0.87797	no	0.424846	0.259821	0.182009	0.195306	0.096935	0.104859
ENSMUSG00000028441	1110017D15Rik	4:41505008-41517333	OK	3.30311	1.69483	-0.962687	-1.77636	0.002	0.047057	yes	2.99187	3.83375	3.08372	1.58925	1.9108	1.69002
ENSMUSG00000099979	Gm5896	7:41128645-41290183	OK	0.279255	0.143446	-0.961073	-1.11686	0.0557	0.480667	no	0.171513	0.409078	0.257173	0.118269	0.14675	0.190495
ENSMUSG00000090264	Eif4ebp3	18:36559986-36665917	OK	1.57029	0.807723	-0.959102	-0.441065	0.61175	0.999642	no	0.889809	2.93786	0.883207	1.06852	0	1.09385
ENSMUSG00000026494	Kif26b	1:178529124-178939200	OK	5.65564	2.90935	-0.958994	-4.82796	5e-05	0.002075	yes	4.41964	6.02388	6.5234	2.2435	3.27417	3.87622
ENSMUSG00000083657	Gm12245	11:57948728-57949085	OK	0.549845	0.282849	-0.958994	-0.683071	0.3403	0.999642	no	0.454411	1.00045	0.194675	0.313346	0	0.504704
ENSMUSG00000006411	Nectin4	1:171370098-171388598	OK	2.7264	1.40359	-0.957878	-3.46484	5e-05	0.002075	yes	2.57261	2.54966	3.05692	1.07612	1.62769	1.83442
ENSMUSG00000020614	Fam20a	11:109669748-109722279	OK	0.423115	0.21786	-0.957649	-1.28259	0.01375	0.196461	no	0.220907	0.442145	0.606293	0.24583	0.162834	0.216945
ENSMUSG00000032420	Nt5e	9:88327196-88372092	OK	1.18218	0.60952	-0.955702	-2.96677	5e-05	0.002075	yes	1.15781	1.0837	1.30503	0.512331	0.71199	0.701426
ENSMUSG00000109523	Gdf1	8:70315774-70353278	OK	1.36726	0.707726	-0.950026	-0.501899	0.41595	0.999642	no	1.27291	1.14362	1.68525	0.331697	0.758696	1.40882
ENSMUSG00000060777	Gm10087	7:110308012-110614922	OK	1.49034	0.771988	-0.948986	-0.240276	0.667	0.999642	no	0.728208	1.403	2.33979	0.37661	1.12152	1.21321
ENSMUSG00000083853	Gm15696	16:31962505-32003287	OK	0.440555	0.228594	-0.946533	-0.210018	0.6121	0.999642	no	0.29058	0.533134	0.497951	0.200421	0.298351	0.215183
ENSMUSG00000041730	Prrxl1	14:32599406-32649246	OK	0.572835	0.298574	-0.940028	-1.90451	0.0003	0.00993006	yes	1.14142	0.205381	0.371705	0.215684	0.33805	0.42488
ENSMUSG00000068243	Gm7079	X:8042942-8074760	OK	21.5617	11.2465	-0.939003	-0.254381	0.6381	0.999642	no	18.0494	19.8692	26.7666	14.3611	8.55329	7.71041
ENSMUSG00000020562	Efcab10	12:33394853-33401269	OK	0.622481	0.325112	-0.937094	-1.19274	0.02925	0.319103	no	0.298219	0.547142	1.02208	0.257052	0.510323	0.27602
ENSMUSG00000108617	Gm31749	7:127027728-127042471	OK	0.321829	0.168119	-0.936815	-0.159439	0.6139	0.999642	no	0.475055	0.261475	0.228959	0.122843	0.426789	0
ENSMUSG00000026344	Lypd1	1:125676994-125913101	OK	2.81114	1.47088	-0.934479	-1.12343	0.0219	0.264031	no	2.84827	2.15937	3.42579	1.56838	1.57329	1.17345
ENSMUSG00000032033	Barx2	9:31846043-31913462	OK	2.6719	1.39942	-0.933035	-2.94339	5e-05	0.002075	yes	2.95268	2.32796	2.73505	1.16936	1.51582	1.74314
ENSMUSG00000042451	Mybph	1:134193447-134235431	OK	0.261219	0.136851	-0.932651	-0.938252	0.0857	0.60527	no	0.173351	0.257541	0.352763	0.0896527	0.207652	0.160447
ENSMUSG00000110020	RP24-502E20.5	7:45825222-45883732	OK	0.317196	0.166455	-0.930237	-0.195513	0.4561	0.999642	no	0.336442	0.425618	0.189526	0.152968	0.233516	0.126369
ENSMUSG00000036545	Adamts2	11:50599297-50807573	OK	0.965907	0.507017	-0.929851	-1.13911	0.01145	0.170994	no	0.98583	0.917348	0.994543	0.404506	0.752275	0.46678
ENSMUSG00000071715	Ncf4	15:78244800-78262580	OK	3.73022	1.96071	-0.92788	-1.89147	0.00055	0.0170438	yes	2.88303	3.96195	4.34567	1.68798	2.76955	1.69734
ENSMUSG00000047428	Dlk2	17:46297420-46328352	OK	1.10407	0.580826	-0.926647	-1.0038	0.0455	0.423394	no	1.02479	1.15005	1.13735	0.448012	0.810293	0.616987
ENSMUSG00000094594	Tpd52-ps	8:79680283-79680806	OK	0.257144	0.135304	-0.926365	-0.549837	0.33145	0.999642	no	0.219844	0.0806695	0.470918	0.151597	0.075241	0.162784
ENSMUSG00000083718	Ccnb2-ps	8:71908607-71934629	OK	0.351611	0.185143	-0.925343	-0.331239	0.48065	0.999642	no	0.277924	0.418495	0.358415	0.140155	0.285937	0.174325
ENSMUSG00000047686	Zcchc5	X:106837081-106840644	OK	1.20973	0.637087	-0.925117	-2.60244	5e-05	0.002075	yes	1.16316	1.28985	1.17616	0.318472	0.904484	1.00692
ENSMUSG00000050397	Foxl2	9:98955606-98956847	OK	3.37021	1.77736	-0.923106	-2.69274	5e-05	0.002075	yes	3.5953	3.78354	2.73179	1.33315	2.48418	1.95894
ENSMUSG00000038195	Rilp	11:75510093-75513168	OK	0.27402	0.144669	-0.921523	-1.1401	0.02865	0.314975	no	0.28437	0.31278	0.224911	0.0452509	0.269515	0.21866
ENSMUSG00000086549	Gm13648	4:156034839-156059802	OK	1.13958	0.601914	-0.920877	-1.94638	0.00035	0.0114701	yes	1.09178	1.24062	1.08634	0.47357	0.795534	0.664983
ENSMUSG00000053835	H2-T24	17:35994452-36042747	OK	0.562834	0.297387	-0.920368	-0.892805	0.09255	0.631412	no	0.37629	0.702375	0.609839	0.245397	0.316671	0.382083
ENSMUSG00000047361	Gm973	1:59516263-59670834	OK	1.18015	0.623754	-0.919921	-0.185603	0.24595	0.931559	no	0.715953	1.7428	1.0817	0.227254	0.763017	1.27749
ENSMUSG00000105827	Hist2h2bb	3:96267074-96279001	OK	2.43178	1.28627	-0.918822	-0.966995	0.14855	0.771832	no	0.927291	5.83385	0.534187	1.9013	0.920514	0.421956
ENSMUSG00000036611	Eepd1	9:25481546-25604110	OK	6.94016	3.67419	-0.917543	-3.68291	5e-05	0.002075	yes	6.41885	7.45702	6.94461	3.50672	3.85482	3.82849
ENSMUSG00000043629	1700019D03Rik	1:52922323-53020179	OK	1.32343	0.700779	-0.917248	-1.15008	0.02275	0.2717	no	1.5033	0.669052	1.79793	0.8622	0.504831	0.573884
ENSMUSG00000063935	Zar1	5:72576805-72581254	OK	0.499559	0.264784	-0.915837	-1.15358	0.03765	0.375976	no	0.448554	0.554038	0.496085	0.130953	0.262512	0.534719
ENSMUSG00000031760	Mt3	8:94152606-94154146	OK	5.20019	2.75653	-0.91571	-2.16638	0.00015	0.00546921	yes	5.68229	6.29783	3.62045	2.15879	4.37078	2.33778
ENSMUSG00000078816	Prkcg	7:3289079-3331099	OK	0.490748	0.260411	-0.914193	-0.350299	0.2699	0.953719	no	0.66334	0.256322	0.552583	0.244323	0.242526	0.310471
ENSMUSG00000019909	Fam162b	10:51585419-51590480	OK	1.73909	0.922897	-0.914094	-1.64178	0.00375	0.0758124	no	2.10056	1.09194	2.02478	0.603531	1.31801	1.16652
ENSMUSG00000087355	Gm13187	2:4017716-4614043	OK	0.922231	0.49051	-0.910847	-0.216481	0.48085	0.999642	no	0.868431	0.997299	0.900964	0.4083	0.775748	0.369691
ENSMUSG00000085141	Gm13429	2:36202313-36212903	OK	2.68775	1.43127	-0.909104	-1.56813	0.00555	0.101516	no	3.2104	1.73253	3.12033	0.985175	2.17001	1.58472
ENSMUSG00000037636	Slc25a43	X:36743658-36777202	OK	0.349743	0.186386	-0.908	-1.15334	0.02665	0.300053	no	0.413566	0.3699	0.265764	0.0534713	0.265391	0.373212
ENSMUSG00000029784	Ssmem1	6:30509848-30520254	OK	0.36239	0.193288	-0.906793	-0.912939	0.03195	0.33634	no	0.468623	0.353205	0.265342	0.153002	0.329068	0.138079
ENSMUSG00000062846	Gm14176	2:157901535-157902012	OK	0.29548	0.15766	-0.906243	-0.535037	0.3464	0.999642	no	0.0855652	0.470959	0.329914	0.0885042	0.26356	0.19007
ENSMUSG00000044156	Hepacam2	6:3457095-3498298	OK	0.358601	0.191417	-0.905656	-0.985786	0.0241	0.282312	no	0.408774	0.260866	0.406161	0.195315	0.215519	0.159519
ENSMUSG00000050671	Ism2	12:87278637-87299705	OK	0.883739	0.47175	-0.905596	-1.28395	0.01905	0.241666	no	0.808054	0.607288	1.23587	0.24043	0.754728	0.651413
ENSMUSG00000036144	Meox2	12:37108539-37179534	OK	0.855047	0.456534	-0.905281	-2.22768	5e-05	0.002075	yes	0.82716	0.73084	1.00714	0.484073	0.44699	0.411001
ENSMUSG00000048442	Smim5	11:115858405-115966725	OK	0.389255	0.208722	-0.89913	-0.240196	0.4722	0.999642	no	0.235163	0.369087	0.563515	0.186739	0.265755	0.195657
ENSMUSG00000079669	Gm17396	9:116572745-117629913	OK	1.0184	0.546705	-0.89747	-0.909062	0.1071	0.673182	no	0.889163	1.08559	1.08045	0.35116	0.730354	0.754147
ENSMUSG00000078588	Ccdc24	4:117834505-117883487	OK	0.985575	0.530083	-0.894746	-0.352236	0.28595	0.968203	no	1.20557	0.477043	1.27412	0.25411	0.557273	1.05484
ENSMUSG00000049539	Hist1h1a	13:23763716-23764358	OK	0.907604	0.488623	-0.893341	-1.29716	0.0199	0.248254	no	0.320615	2.05881	0.343387	0.497441	0.603513	0.356099
ENSMUSG00000051048	P4ha3	7:100285519-100319699	OK	2.18417	1.1761	-0.893073	-2.27981	5e-05	0.002075	yes	1.46148	1.99226	3.09878	0.846491	1.5415	1.46993
ENSMUSG00000082284	H3f3a-ps1	X:101824514-101824924	OK	1.21596	0.655567	-0.89128	-1.01803	0.05925	0.497778	no	0.905479	0.996769	1.74563	0.585363	0.697271	0.754271
ENSMUSG00000027869	Hsd3b6	3:98805503-98814443	OK	3.31567	1.78824	-0.890761	-2.61452	5e-05	0.002075	yes	2.93603	3.99662	3.01436	1.60006	2.31757	1.63527
ENSMUSG00000038086	Hspb2	9:50751071-50752354	OK	1.22019	0.658433	-0.889998	-1.67476	0.00325	0.0682087	no	1.51032	0.729919	1.42033	0.419127	1.05902	0.736454
ENSMUSG00000105835	Gm43552	5:65413220-65537184	OK	0.304446	0.164375	-0.8892	-0.0880989	0.74165	0.999642	no	0.913338	0	0	0	0	0.657498
ENSMUSG00000096755	Ftl1-ps2	10:130592135-130592705	OK	0.362325	0.195636	-0.889113	-0.760214	0.1691	0.81979	no	0.470395	0.443846	0.172734	0.0695074	0.344982	0.298547
ENSMUSG00000034324	Tmem132c	5:127241807-127565793	OK	26.8508	14.5014	-0.888774	-4.63458	5e-05	0.002075	yes	25.4633	26.5098	28.5794	14.6662	13.7503	14.9229
ENSMUSG00000086117	Gm12065	11:24198736-24217601	OK	0.654142	0.354201	-0.885034	-1.15864	0.0353	0.359685	no	0.517859	0.912111	0.532456	0.267823	0.478537	0.402621
ENSMUSG00000107481	4833403J16Rik	6:48754229-48756368	OK	0.260616	0.14126	-0.883575	-1.00036	0.08415	0.598581	no	0.396816	0.0936048	0.291429	0.175905	0.0873059	0.125924
ENSMUSG00000082769	Gm15793	1:66830838-66863277	OK	0.540628	0.293151	-0.882994	-0.267297	0.71015	0.999642	no	0.722684	0.176788	0.722413	0.332225	0.329782	0.178371
ENSMUSG00000023216	Epb42	2:121017890-121037072	OK	4.57452	2.48329	-0.881366	-1.15009	0.0406	0.397269	no	4.04589	4.41618	5.26149	1.56472	3.07583	3.72788
ENSMUSG00000024784	Gpha2	19:6226379-6235872	OK	0.370493	0.201148	-0.881188	-0.278736	0.66845	0.999642	no	0.231095	0.0635963	0.816789	0.217067	0.177956	0.192503
ENSMUSG00000098557	Kctd12	14:102976580-102982637	OK	27.4273	14.8996	-0.880336	-5.23521	5e-05	0.002075	yes	25.3761	26.0183	30.8873	13.8851	14.8496	16.9786
ENSMUSG00000027416	Otor	2:143078472-143081713	OK	1.39956	0.762495	-0.876178	-1.79653	0.00155	0.0386727	yes	1.13248	1.00425	2.06196	0.488074	1.13047	0.943364
ENSMUSG00000028825	Rhd	4:134864535-134896172	OK	4.03778	2.20175	-0.874911	-2.2499	5e-05	0.002075	yes	2.59636	4.44486	5.07213	1.83858	2.99028	2.13956
ENSMUSG00000106391	Gm42690	5:100429725-100431561	OK	0.498958	0.272086	-0.874855	-1.70233	0.00265	0.058438	no	0.460005	0.538032	0.498837	0.267641	0.265673	0.287391
ENSMUSG00000108030	9530062K07Rik	6:116199407-116207993	OK	0.255413	0.139281	-0.874833	-0.743278	0.1231	0.711661	no	0.0803557	0.221143	0.464741	0.0415579	0.206262	0.267747
ENSMUSG00000000120	Ngfr	11:95568817-95587735	OK	9.5278	5.19599	-0.874745	-4.3997	5e-05	0.002075	yes	10.9895	8.33596	9.2579	4.4854	5.98364	5.82952
ENSMUSG00000069266	Hist1h4b	13:23756202-23757620	OK	2.26505	1.23795	-0.871597	-1.37251	0.0163	0.216769	no	1.81078	3.58802	1.39637	1.12379	1.36342	1.34079
ENSMUSG00000035557	Krt17	11:100256216-100261029	OK	0.508287	0.277903	-0.871061	-1.58126	0.00565	0.102438	no	0.470164	0.517566	0.53713	0.234151	0.411221	0.232089
ENSMUSG00000084067	Gm14269	2:170463513-170463819	OK	1.39678	0.764965	-0.868634	-0.744615	0.15115	0.778497	no	1.3211	1.45429	1.41493	0.683238	0.226072	1.46731
ENSMUSG00000075268	Gm10819	19:16132830-16387463	OK	0.72036	0.395136	-0.866371	-0.242454	0.6806	0.999642	no	0.982679	0.504818	0.673585	0.406573	0.403584	0.363813
ENSMUSG00000057696	Rpl30-ps1	6:38376806-38377154	OK	1.30218	0.715853	-0.863193	-0.879185	0.0773	0.570748	no	1.28433	1.59054	1.03166	0.498166	1.15384	0.713237
ENSMUSG00000086544	Chn1os3	2:73596525-73775346	OK	0.360052	0.198222	-0.861087	-0.197708	0.5802	0.999642	no	0.186948	0.477659	0.415548	0.24636	0.201547	0.0986201
ENSMUSG00000060727	Gm12571	11:78094659-78156700	OK	1.61227	0.887858	-0.860692	-0.212959	0.69505	0.999642	no	1.70572	0.938844	2.19225	0.882153	1.3135	0.473625
ENSMUSG00000082193	Rpl5-ps1	1:14865071-14865965	OK	0.423164	0.23312	-0.860147	-1.0598	0.0492	0.446258	no	0.203761	0.672912	0.39282	0.21076	0.20921	0.30175
ENSMUSG00000062704	9430002A10Rik	8:88174559-88175034	OK	1.11519	0.614969	-0.858704	-1.10433	0.0375	0.374932	no	1.1457	1.06718	1.13269	0.638089	1.08585	0.0978448
ENSMUSG00000024399	Ltb	17:35194438-35196320	OK	0.268735	0.148369	-0.85699	-0.79793	0.0671	0.530819	no	0.40114	0.147193	0.257871	0.152214	0.103409	0.185639
ENSMUSG00000060735	Rxfp3	15:11033716-11037991	OK	0.472199	0.260787	-0.856523	-2.11748	0.00025	0.00851392	yes	0.536218	0.539502	0.340877	0.155059	0.355198	0.377831
ENSMUSG00000000142	Axin2	11:108920348-108950783	OK	24.9422	13.7878	-0.855203	-3.78784	5e-05	0.002075	yes	24.4348	25.3279	25.064	14.0282	13.3761	13.7186
ENSMUSG00000080198	Gm13573	2:60251992-60284488	OK	0.547372	0.303378	-0.851404	-0.451291	0.40765	0.999642	no	0.274039	0.663669	0.704408	0.283452	0.281368	0.365242
ENSMUSG00000092627	D130058E05Rik	1:89927955-89933290	OK	0.541157	0.300218	-0.850039	-1.19689	0.02835	0.312588	no	0.546336	0.53166	0.545476	0.315716	0.389652	0.179787
ENSMUSG00000041731	Pgm5	19:24683015-24861855	OK	2.01483	1.11861	-0.848947	-2.11862	5e-05	0.002075	yes	1.64388	2.04	2.3606	0.727875	1.46222	1.55648
ENSMUSG00000084170	Gm11954	11:4002456-4002805	OK	0.602985	0.335403	-0.846225	-0.598789	0.3889	0.999642	no	0.637934	0.351125	0.819894	0.329923	0.327497	0.354269
ENSMUSG00000086645	Gm15743	16:31422279-31458901	OK	0.751337	0.418014	-0.845908	-0.296241	0.46	0.999642	no	0.893747	0.534687	0.825577	0.486948	0.467835	0.230327
ENSMUSG00000045545	Krt14	11:100203161-100207548	OK	11.4046	6.35757	-0.843064	-3.30507	5e-05	0.002075	yes	10.4334	10.4992	13.2811	5.41663	8.1716	6.42542
ENSMUSG00000006574	Slc4a1	11:102348823-102366203	OK	19.304	10.8167	-0.835633	-1.65301	0.00215	0.0499459	yes	13.5224	27.0698	17.3197	7.97826	14.5261	12.7843
ENSMUSG00000059305	Vpreb1	16:16868401-16892990	OK	0.833863	0.467791	-0.833946	-0.387357	0.5274	0.999642	no	0.859126	0.784184	0.858279	0.459771	0.457106	0.494516
ENSMUSG00000089617	Scarna10	6:125168006-125191701	OK	1.61829	0.908257	-0.833297	-0.114785	0.6528	0.999642	no	0	3.55964	1.29523	1.04405	0.713775	0.831156
ENSMUSG00000049100	Pcdh10	3:45378397-45440956	OK	5.3664	3.01277	-0.832864	-1.73882	0.0011	0.029932	yes	5.36856	5.56013	5.1705	2.18611	3.23096	4.44789
ENSMUSG00000031125	3830403N18Rik	X:56136571-56153498	OK	0.290591	0.163292	-0.831539	-0.953575	0.0781	0.574344	no	0.429829	0	0.441945	0.237116	0.147108	0.0318267
ENSMUSG00000099170	5730403I07Rik	9:77366411-77399418	OK	0.319494	0.179704	-0.830169	-1.41256	0.0109	0.165474	no	0.230905	0.282427	0.445149	0.0928805	0.276593	0.25646
ENSMUSG00000058773	Hist1h1b	13:21779882-21780625	OK	0.664735	0.374252	-0.828771	-1.14321	0.0347	0.355767	no	0.304143	1.57838	0.111684	0.449414	0.356888	0.241289
ENSMUSG00000092402	Gm20485	5:136741758-136883209	OK	0.393452	0.221684	-0.827684	-0.103223	0.6815	0.999642	no	0.122599	0.269918	0.787839	0.380429	0.125877	0
ENSMUSG00000100706	Gm19744	8:48227681-48869901	OK	2.47931	1.39822	-0.826345	-0.227033	0.3804	0.999642	no	1.91034	0.506355	5.02124	0.955373	1.1882	2.49394
ENSMUSG00000004655	Aqp1	6:55336431-55348555	OK	0.97867	0.552772	-0.824136	-2.18102	0.00015	0.00546921	yes	0.832916	0.746306	1.35679	0.510904	0.715974	0.473307
ENSMUSG00000072460	Atp5l-ps1	7:62476305-62476617	OK	1.07213	0.606036	-0.823011	-0.6249	0.30585	0.982826	no	1.25642	1.15258	0.807399	0.433193	0.860017	0.69774
ENSMUSG00000031304	Il2rg	X:101261375-101269023	OK	0.96267	0.544217	-0.822858	-1.37513	0.0062	0.110232	no	0.985395	0.843896	1.05872	0.534933	0.591454	0.51555
ENSMUSG00000081700	Atp5k-ps2	2:173984481-173984691	OK	1.24939	0.70658	-0.8223	-0.562171	0.3695	0.999642	no	1.36623	1.50398	0.877964	1.41316	0	0
ENSMUSG00000029442	Wdr66	5:123252101-123327484	OK	1.99269	1.12729	-0.821862	-1.46733	0.0049	0.09292	no	2.58395	1.43443	1.95968	0.966122	1.56826	1.00864
ENSMUSG00000022803	Popdc2	16:38346990-38378216	OK	0.649839	0.367803	-0.821148	-0.491993	0.2232	0.902452	no	0.591481	0.881683	0.476351	0.407117	0.381376	0.275603
ENSMUSG00000005640	Insrr	3:87617558-87824306	OK	0.320526	0.181464	-0.820755	-0.346502	0.3369	0.999642	no	0.266916	0.442955	0.251708	0.188586	0.162384	0.186301
ENSMUSG00000025573	6030468B19Rik	11:117797659-117807301	OK	0.970027	0.549491	-0.81993	-1.60254	0.0048	0.0913382	no	0.811153	1.36916	0.729765	0.671211	0.55523	0.300309
ENSMUSG00000064202	4430402I18Rik	19:28835048-28967800	OK	0.343471	0.19506	-0.816269	-0.321775	0.4885	0.999642	no	0.0904553	0.657037	0.282921	0.0935621	0.440479	0.152637
ENSMUSG00000026418	Tnni1	1:135779433-135810989	OK	1.27069	0.722287	-0.814966	-1.34306	0.00415	0.0816991	no	0.827289	1.57389	1.41089	0.772811	0.788023	0.555505
ENSMUSG00000031910	Has3	8:106870241-106893601	OK	0.535359	0.304357	-0.814741	-0.386325	0.50315	0.999642	no	0.451458	0.610448	0.54417	0.202992	0.335836	0.475608
ENSMUSG00000095276	Gfy	7:45176348-45179569	OK	0.283212	0.161038	-0.814482	-0.86623	0.0661	0.526918	no	0.315846	0.172698	0.361092	0.129681	0.175717	0.209072
ENSMUSG00000026668	Ucma	2:4976121-4985748	OK	0.718578	0.409507	-0.811259	-0.932256	0.0254	0.291544	no	1.03489	0.607178	0.513664	0.339331	0.629353	0.330011
ENSMUSG00000052353	Cemip	7:83932856-84086502	OK	0.390128	0.22254	-0.809881	-1.74338	0.0007	0.0207948	yes	0.358898	0.448864	0.362623	0.123047	0.252268	0.3918
ENSMUSG00000105349	Gm43604	5:136116630-136136074	OK	0.347679	0.198358	-0.809652	-0.173385	0.64385	0.999642	no	0.373959	0.308683	0.360395	0.145022	0.191941	0.311447
ENSMUSG00000082908	Gm13736	2:87526144-87526397	OK	1.39096	0.793864	-0.809122	-0.714992	0.40275	0.999642	no	1.1304	2.07394	0.968551	1.16923	0	0.837005
ENSMUSG00000042351	Grap2	15:80623504-80650559	OK	0.980721	0.560287	-0.807676	-2.28142	5e-05	0.002075	yes	0.738881	1.17196	1.03132	0.517724	0.579177	0.626523
ENSMUSG00000080895	Gm11645	2:143506410-143507059	OK	0.847702	0.484776	-0.806238	-1.15802	0.033	0.343887	no	0.525979	1.67912	0.338003	0.326427	0.702059	0.584192
ENSMUSG00000042988	Notum	11:120646030-120661815	OK	3.16193	1.80929	-0.805381	-1.53781	0.00465	0.0887908	no	3.65423	2.44969	3.38187	1.66636	1.94092	1.96352
ENSMUSG00000068141	Gm10232	17:3044013-3044733	OK	0.373061	0.213565	-0.804736	-0.816821	0.11955	0.701841	no	0.544565	0.399645	0.174973	0.281635	0.139782	0.151209
ENSMUSG00000023982	Guca1a	17:47394559-47400584	OK	0.289724	0.165923	-0.804164	-0.802679	0.1234	0.711661	no	0.140515	0.232022	0.496634	0.181676	0.144273	0.156066
ENSMUSG00000013584	Aldh1a2	9:71215788-71296243	OK	4.10665	2.35455	-0.802512	-2.93489	5e-05	0.002075	yes	3.53107	4.33847	4.45041	1.27243	3.20447	3.66885
ENSMUSG00000091785	Rpl29-ps5	18:30459082-30459559	OK	0.3997	0.229262	-0.801922	-0.561151	0.2752	0.957548	no	0.256696	0.282576	0.659828	0.177008	0.0878535	0.475176
ENSMUSG00000082064	Rpl5-ps2	2:154703808-154704699	OK	0.817521	0.468987	-0.801707	-1.39634	0.01105	0.166983	no	0.818595	0.713391	0.920575	0.423356	0.385223	0.644013
ENSMUSG00000076441	Ass1	2:31470206-31520672	OK	2.25773	1.29551	-0.801356	-1.678	0.0022	0.0506798	no	2.51517	1.83464	2.42339	1.15227	1.57112	1.30637
ENSMUSG00000053475	Tnfaip6	2:52038008-52056686	OK	24.1953	13.8981	-0.799838	-4.18309	5e-05	0.002075	yes	23.2717	23.3888	25.9256	12.0516	15.0017	16.4876
ENSMUSG00000062742	Gm5239	18:35536582-35536951	OK	2.1989	1.26383	-0.798979	-1.18745	0.03495	0.356779	no	1.97097	1.54977	3.07597	0.728095	1.87913	1.72001
ENSMUSG00000038112	AW551984	9:39587395-39604403	OK	5.39541	3.1036	-0.79779	-1.27694	0.01785	0.22926	no	5.47114	5.35601	5.35909	1.93318	5.06619	3.48186
ENSMUSG00000097221	1810049J17Rik	15:12321437-12351265	OK	0.487506	0.280699	-0.796396	-0.170364	0.71575	0.999642	no	0.814615	0.298915	0.34899	0	1.02227	0.10053
ENSMUSG00000020334	Slc22a4	11:53983122-54028090	OK	0.536469	0.30891	-0.796308	-0.837414	0.08615	0.606539	no	0.273506	0.920826	0.415075	0.273992	0.269119	0.418537
ENSMUSG00000108435	Gm45051	6:72347028-72353148	OK	0.955975	0.550635	-0.795877	-0.456775	0.39645	0.999642	no	0.89548	0.781842	1.1906	0.511128	0.665807	0.514477
ENSMUSG00000027270	Lamp5	2:136052238-136069917	OK	0.820235	0.472468	-0.79582	-0.805868	0.07585	0.564957	no	0.655602	0.793507	1.0116	0.433629	0.52811	0.494505
ENSMUSG00000010651	Acaa1b	9:119102477-119157093	OK	0.54647	0.314882	-0.79533	-0.965267	0.0647	0.521547	no	0.561408	0.488213	0.589789	0.294109	0.373043	0.298267
ENSMUSG00000029219	Slc10a4	5:73006882-73012955	OK	0.759193	0.438128	-0.793114	-1.46546	0.00675	0.116988	no	0.560318	0.892802	0.824459	0.0996987	0.721974	0.83114
ENSMUSG00000081683	Fzd10	5:128600843-128604093	OK	6.83603	3.94592	-0.792797	-3.69415	5e-05	0.002075	yes	6.47229	6.83643	7.19938	3.88924	4.24829	3.75691
ENSMUSG00000021876	Rnase4	14:51091076-51106151	OK	6.81	3.93142	-0.792604	-2.99878	5e-05	0.002075	yes	5.44277	6.8021	8.18513	3.58325	3.87624	4.68293
ENSMUSG00000015957	Wnt11	7:98835111-98855195	OK	1.57982	0.912122	-0.792465	-1.96362	0.0003	0.00993006	yes	1.38588	1.65827	1.69532	0.637423	1.42528	0.94836
ENSMUSG00000084772	Gm15473	6:17058805-17064996	OK	0.537622	0.310533	-0.791844	-1.32647	0.0157	0.211687	no	0.288573	0.397084	0.927209	0.273611	0.320981	0.37393
ENSMUSG00000001119	Col6a1	10:76708791-76726168	OK	2.11627	1.22263	-0.791536	-2.88923	5e-05	0.002075	yes	1.86162	2.19522	2.29196	1.00952	1.62686	1.24461
ENSMUSG00000106947	1700025A08Rik	5:67607217-67607826	OK	1.29197	0.747161	-0.790076	-1.27355	0.02055	0.253113	no	0.577746	1.14479	2.15336	0.298795	1.36435	1.0267
ENSMUSG00000072591	5930412G12Rik	5:128579105-128600693	OK	16.4351	9.50897	-0.789423	-1.2444	0.0262	0.296604	no	14.691	14.8803	19.7341	11.0952	8.30771	7.53782
ENSMUSG00000027737	Slc7a11	3:49892525-50443614	OK	0.805224	0.466372	-0.787909	-1.7931	5e-05	0.002075	yes	0.810971	0.848608	0.756091	0.429533	0.520708	0.485714
ENSMUSG00000074863	Platr25	13:62699405-62726689	OK	4.08266	2.36605	-0.787029	-2.19613	0.00015	0.00546921	yes	2.19304	4.69545	5.35947	2.04091	3.33239	2.04998
ENSMUSG00000025481	Urah	7:140807448-140898643	OK	1.12886	0.654597	-0.786194	-0.175394	0.4406	0.999642	no	0.967446	0.650681	1.76847	0.518862	0.610002	0.970661
ENSMUSG00000052957	Gas1	13:60174404-60177365	OK	62.9969	36.5548	-0.785218	-4.78121	5e-05	0.002075	yes	67.1711	59.6344	62.1851	34.8756	40.3614	36.1067
ENSMUSG00000024810	Il33	19:29925113-29960718	OK	0.291091	0.169138	-0.783266	-0.52287	0.1233	0.711661	no	0.27742	0.147751	0.448102	0.14551	0.196183	0.189351
ENSMUSG00000052187	Hbb-y	7:103851748-103853216	OK	5894.49	3426.22	-0.782751	-3.44861	5e-05	0.002075	yes	4222.52	7083.15	6377.8	3167.98	3983.52	3385.39
ENSMUSG00000021679	S100z	13:95477300-95478655	OK	0.821743	0.478091	-0.781401	-0.647962	0.4103	0.999642	no	0.463921	0.510693	1.49062	0.479855	0.952655	0
ENSMUSG00000025489	Ifitm5	7:140948957-140955987	OK	0.679367	0.395425	-0.780785	-0.261695	0.68425	0.999642	no	0.626242	1.05711	0.354745	0.475019	0.21433	0.417332
ENSMUSG00000104514	Gm37164	3:13470438-14182287	OK	0.565257	0.329206	-0.779919	-0.626211	0.2508	0.93511	no	0.594559	0.476002	0.625212	0.279538	0.277482	0.480265
ENSMUSG00000024806	Mlana	19:29697920-29708448	OK	0.433268	0.252342	-0.779882	-0.779522	0.11545	0.693162	no	0.223403	0.430371	0.646031	0.115538	0.344066	0.434224
ENSMUSG00000044176	Spink10	18:62548910-62741387	OK	0.684114	0.398894	-0.778233	-0.748928	0.11215	0.684703	no	0.505174	1.17155	0.37562	0.186743	0.700527	0.521562
ENSMUSG00000085553	Gm14808	X:99459024-99460753	OK	0.793603	0.463525	-0.775769	-0.705648	0.3032	0.980414	no	0.590967	0.650548	1.1393	0.611265	0.303385	0.328186
ENSMUSG00000040505	Abcg5	17:84658233-84700333	OK	0.808807	0.472597	-0.775185	-1.26291	0.0188	0.238861	no	0.607739	0.873695	0.944989	0.637396	0.268003	0.347594
ENSMUSG00000035799	Twist1	12:33957670-33959817	OK	135.737	79.3826	-0.773925	-4.70843	5e-05	0.002075	yes	139.247	130.592	137.373	68.2692	90.2484	90.7435
ENSMUSG00000085488	4930557F10Rik	13:23276203-23313400	OK	0.271872	0.159199	-0.772097	-0.659551	0.2711	0.954312	no	0.109872	0.423323	0.282422	0.170469	0.11281	0.183048
ENSMUSG00000090486	BC035947	1:78497025-78538173	OK	0.257797	0.151092	-0.77081	-1.30254	0.01865	0.237321	no	0.188803	0.289179	0.295409	0.128794	0.219137	0.127643
ENSMUSG00000110458	RP24-366L10.4	8:20122383-20122494	OK	14.9085	8.73935	-0.77054	-0.616947	0.308	0.985135	no	13.5785	22.4213	8.72579	7.02246	20.9125	0
ENSMUSG00000039942	Ptger4	15:5143860-5244187	OK	0.331472	0.194314	-0.770497	-0.434118	0.4845	0.999642	no	0.29717	0.270176	0.42707	0.126842	0.297256	0.226316
ENSMUSG00000060675	Pla2g16	19:7557458-7588545	OK	7.49068	4.39207	-0.770197	-2.51327	5e-05	0.002075	yes	6.52417	6.99142	8.95645	4.28369	4.54915	4.45175
ENSMUSG00000100832	Gm29260	1:41781807-41939560	OK	0.387214	0.227118	-0.769687	-1.27715	0.0073	0.12456	no	0.431694	0.363997	0.36595	0.237512	0.188612	0.244837
ENSMUSG00000037188	Grhl3	4:135541887-135573630	OK	4.45415	2.61409	-0.76884	-3.10098	5e-05	0.002075	yes	4.23964	4.32729	4.79552	2.07525	3.1599	3.14596
ENSMUSG00000048368	Omd	13:49464026-49652746	OK	0.265346	0.155746	-0.768682	-0.337749	0.6358	0.999642	no	0.346983	0.11459	0.334466	0.0897253	0.231571	0.211962
ENSMUSG00000086421	Gm14091	2:118814002-118853957	OK	0.513805	0.301859	-0.767346	-0.223785	0.72325	0.999642	no	0.244802	0.577464	0.71915	0.325556	0.323163	0.233161
ENSMUSG00000020787	P2rx1	11:72999102-73015200	OK	0.512783	0.301572	-0.765846	-1.36537	0.0116	0.172145	no	0.230214	0.832465	0.475669	0.337194	0.314893	0.217007
ENSMUSG00000019851	Perp	10:18845070-18857073	OK	16.4881	9.71733	-0.762791	-3.79619	5e-05	0.002075	yes	15.484	14.5949	19.3853	8.43693	11.1855	10.81
ENSMUSG00000105789	Gm42997	3:130730459-130771643	OK	0.269624	0.159043	-0.761529	-0.784824	0.1182	0.699251	no	0.240083	0.144516	0.424274	0.155206	0.092439	0.233323
ENSMUSG00000028364	Tnc	4:63959784-64149924	OK	1.34159	0.791787	-0.760762	-2.84303	5e-05	0.002075	yes	1.01826	1.37104	1.63547	0.552467	0.934416	1.1278
ENSMUSG00000005320	Fgfr4	13:55152639-55168759	OK	0.416415	0.245795	-0.760564	-0.736237	0.0713	0.548773	no	0.376345	0.524848	0.348051	0.202301	0.248239	0.33034
ENSMUSG00000020151	Ptprr	10:116018212-116274932	OK	0.255676	0.150924	-0.760496	-0.704762	0.07315	0.556014	no	0.292769	0.223911	0.250347	0.101	0.187079	0.214615
ENSMUSG00000083326	Rpl38-ps1	4:138425787-138426002	OK	1.69674	1.00188	-0.760054	-0.382979	0.4398	0.999642	no	1.2635	1.39089	2.43584	0.653449	1.29729	1.40334
ENSMUSG00000028328	Tmod1	4:46038934-46196311	OK	1.28302	0.757681	-0.759882	-0.209685	0.42505	0.999642	no	1.80116	0.931308	1.1166	0.61852	0.860938	0.932745
ENSMUSG00000021613	Hapln1	13:89540635-89611832	OK	8.58727	5.07321	-0.759302	-4.06855	5e-05	0.002075	yes	8.60367	8.09677	9.06137	5.92612	4.30758	4.13301
ENSMUSG00000006344	Ggt5	10:75589339-75617200	OK	0.512274	0.302653	-0.759249	-0.818739	0.10715	0.673182	no	0.420632	0.498342	0.617848	0.19891	0.280218	0.532576
ENSMUSG00000100980	Gm29100	1:91798527-91848028	OK	0.648172	0.382997	-0.759043	-1.06228	0.05285	0.46881	no	0.764567	0.620487	0.559463	0.35212	0.338072	0.489676
ENSMUSG00000031616	Ednra	8:77610859-77769682	OK	15.9328	9.43939	-0.755236	-4.19935	5e-05	0.002075	yes	15.4503	15.9793	16.3688	8.85732	9.65226	10.3907
ENSMUSG00000095406	Gm18025	12:34047579-34917095	OK	0.317281	0.188115	-0.754145	-0.353941	0.5257	0.999642	no	0.266653	0.293529	0.391662	0.197003	0.273803	0.0846518
ENSMUSG00000076270	Mir719	14:60219203-60251507	OK	131.877	78.2208	-0.753571	-0.290867	0.76145	0.999642	no	98.9809	107.029	189.622	127.727	4.5981	52.8305
ENSMUSG00000097666	A330094K24Rik	18:77729680-77733470	OK	0.880161	0.522072	-0.753518	-1.43564	0.00875	0.142248	no	0.769	0.846531	1.02495	0.530276	0.584864	0.442872
ENSMUSG00000021095	Gsc	12:104471208-104473330	OK	17.1147	10.153	-0.753327	-3.37282	5e-05	0.002075	yes	17.4769	18.8264	15.0407	6.61081	14.9799	12.4104
ENSMUSG00000064246	Chil1	1:134182175-134190181	OK	0.37866	0.224684	-0.753005	-0.57845	0.108	0.674309	no	0.504963	0.290928	0.340088	0.263869	0.0905627	0.280435
ENSMUSG00000110216	RP24-323I19.2	8:91710232-91714413	OK	0.385633	0.228886	-0.752598	-1.5772	0.00535	0.0988433	no	0.490199	0.385443	0.281259	0.253518	0.116839	0.291671
ENSMUSG00000067455	Hist1h4j	13:21735063-21735837	OK	0.860695	0.511101	-0.751895	-1.24201	0.02565	0.292584	no	0.86293	1.40228	0.316876	0.425033	0.464099	0.730237
ENSMUSG00000039853	Trim14	4:46489247-46602202	OK	0.418049	0.248308	-0.75154	-0.152825	0.4994	0.999642	no	0.250881	0.745389	0.257877	0.276609	0.139684	0.30033
ENSMUSG00000029337	Fgf5	5:98254183-98277030	OK	0.537575	0.319474	-0.750768	-0.988389	0.0571	0.488158	no	0.29816	0.348626	0.965941	0.243707	0.314677	0.475807
ENSMUSG00000067261	Foxd3	4:99656298-99658622	OK	0.821166	0.488532	-0.749221	-1.82837	0.0012	0.0321238	yes	1.15111	0.572662	0.739724	0.400699	0.636406	0.516322
ENSMUSG00000037661	Gpr160	3:30855949-30897192	OK	0.471531	0.281095	-0.746296	-0.7499	0.0614	0.509108	no	0.487566	0.382793	0.544234	0.32204	0.259828	0.220471
ENSMUSG00000018893	Mb	15:77015488-77057107	OK	0.551035	0.328613	-0.745754	-1.04362	0.0305	0.328402	no	0.495253	0.406296	0.751558	0.254507	0.395506	0.409934
ENSMUSG00000004872	Pax3	1:78101266-78197134	OK	7.24418	4.32025	-0.745708	-3.54899	5e-05	0.002075	yes	7.41182	7.03256	7.28816	4.0394	4.36639	4.83581
ENSMUSG00000064317	Gm10146	10:78393308-78393756	OK	0.549587	0.328021	-0.744559	-0.611282	0.19985	0.876412	no	0.191352	0.842577	0.61483	0.197925	0.491174	0.425061
ENSMUSG00000097842	9330104G04Rik	7:16871346-16874886	OK	3.31469	1.97874	-0.744293	-2.59873	5e-05	0.002075	yes	2.95706	3.5227	3.4643	2.15156	2.03036	1.58146
ENSMUSG00000052229	Gpr17	18:31931506-31958619	OK	0.84086	0.502412	-0.742996	-2.20829	0.00015	0.00546921	yes	0.89362	0.740375	0.888585	0.389185	0.593973	0.637304
ENSMUSG00000068855	Hist2h2ac	3:96220360-96220880	OK	0.456051	0.272604	-0.742388	-0.685724	0.19255	0.867999	no	0.295896	0.977183	0.0950737	0.153029	0.455713	0.328644
ENSMUSG00000084168	Atp5l2-ps	11:97768059-97768371	OK	0.645087	0.385841	-0.741485	-0.443978	0.5091	0.999642	no	0.628212	0.230516	1.07653	0.216597	0.645013	0.46516
ENSMUSG00000026202	Tuba4a	1:75210837-75219865	OK	10.1724	6.08853	-0.740492	-0.838605	0.11335	0.687551	no	8.32294	11.7533	10.4409	5.68169	7.03282	5.9579
ENSMUSG00000041741	Pde3a	6:141246919-141507448	OK	0.842252	0.504265	-0.740068	-2.71911	5e-05	0.002075	yes	0.722018	0.944244	0.860492	0.40146	0.589793	0.624348
ENSMUSG00000029102	Hgfac	5:35041508-35048461	OK	0.360476	0.215995	-0.738904	-0.608276	0.12195	0.708245	no	0.363449	0.302708	0.41527	0.178835	0.144859	0.36145
ENSMUSG00000022324	Matn2	15:34306679-34436242	OK	0.560292	0.335741	-0.738827	-1.84906	0.0006	0.0183863	yes	0.637019	0.602337	0.441518	0.327114	0.167143	0.521594
ENSMUSG00000068762	Gstm6	3:107938846-107943749	OK	0.294841	0.176707	-0.738576	-0.547094	0.11545	0.693162	no	0.308441	0.353953	0.222128	0.17887	0.205166	0.143923
ENSMUSG00000050623	Tex40	19:6922425-6925380	OK	0.359417	0.215524	-0.737808	-0.824958	0.1544	0.787895	no	0.608919	0.312811	0.156521	0.0839779	0.333442	0.3607
ENSMUSG00000048450	Msx1	5:37820484-37824583	OK	102.043	61.2729	-0.735859	-4.47399	5e-05	0.002075	yes	105.113	88.7484	112.268	49.2752	71.0617	75.4796
ENSMUSG00000043496	Tril	6:53815467-53868183	OK	27.0778	16.2715	-0.734765	-4.40944	5e-05	0.002075	yes	26.3317	25.1997	29.702	14.2699	17.4026	19.1436
ENSMUSG00000032322	Pstpip1	9:56089961-56128888	OK	0.288103	0.173485	-0.73177	-0.57852	0.11395	0.688662	no	0.33365	0.309648	0.221011	0.184021	0.215673	0.110228
ENSMUSG00000022362	Gm29394	15:58022258-58076541	OK	3.94553	2.37888	-0.72994	-0.325945	0.52505	0.999642	no	2.36685	3.7587	5.71104	1.64678	2.76972	3.45223
ENSMUSG00000103957	Gm10766	2:127269448-127270054	OK	0.345922	0.208609	-0.729643	-0.383743	0.4295	0.999642	no	0.337846	0.210434	0.489485	0.120407	0.335038	0.258584
ENSMUSG00000054582	Pabpc1l	2:164025449-164050538	OK	2.84069	1.71407	-0.728816	-1.04063	0.046	0.426844	no	1.64289	3.21695	3.66224	1.4937	2.24675	1.62212
ENSMUSG00000057715	A830018L16Rik	1:11414104-11975901	OK	1.0084	0.608611	-0.72848	-1.13263	0.02695	0.30199	no	0.767023	0.929887	1.3283	0.447226	0.930248	0.609745
ENSMUSG00000083921	Gm15750	5:4764833-4765665	OK	0.909422	0.548943	-0.728295	-1.10637	0.043	0.409599	no	0.851946	1.00036	0.875959	0.646219	0.524838	0.378494
ENSMUSG00000110648	RP23-382B3.1	8:126981592-126982232	OK	0.654865	0.395327	-0.72815	-1.0018	0.0678	0.533517	no	0.644161	0.354553	0.965881	0.444191	0.275578	0.417349
ENSMUSG00000032492	Pth1r	9:110722084-110769798	OK	40.3138	24.3488	-0.727421	-3.33681	5e-05	0.002075	yes	39.4508	38.1249	43.3657	20.8255	28.0902	27.6541
ENSMUSG00000098457	Mir8097	15:36239933-36283147	OK	65.3996	39.5431	-0.725856	-0.285015	0.74445	0.999642	no	67.9068	50.0666	78.2253	20.5781	60.0178	56.9983
ENSMUSG00000022615	Tymp	15:89355718-89377039	OK	0.356056	0.215321	-0.725616	-0.208535	0.74375	0.999642	no	0.393318	0.238151	0.436698	0.100285	0.346776	0.313938
ENSMUSG00000048387	Osr1	12:9574441-9581499	OK	8.07165	4.8859	-0.724239	-3.07306	5e-05	0.002075	yes	8.22348	8.79515	7.19633	2.98312	6.53596	7.0414
ENSMUSG00000097072	Foxl2os	9:98949780-98955299	OK	4.78489	2.89697	-0.723942	-1.26635	0.01915	0.242376	no	4.38589	5.24211	4.72667	2.6912	2.78897	3.41651
ENSMUSG00000019732	Calr3	8:72424175-72443870	OK	0.680094	0.412062	-0.722873	-1.45405	0.00705	0.120793	no	0.603168	0.610564	0.826549	0.310111	0.461729	0.566295
ENSMUSG00000038872	Zfhx3	8:108703099-108961630	OK	1.9254	1.16796	-0.72117	-3.27364	5e-05	0.002075	yes	1.4496	1.80316	2.52344	1.06693	1.05635	1.48162
ENSMUSG00000090459	Gm17210	14:32201948-32297550	OK	0.269296	0.163434	-0.720486	-0.108039	0.693	0.999642	no	0.373609	0.274184	0.160094	0.257697	0	0.138341
ENSMUSG00000015766	Eps8	6:137477244-137654876	OK	3.83291	2.32849	-0.719047	-1.57712	0.00115	0.0310368	yes	2.73544	4.53817	4.22512	1.88974	2.63578	2.89869
ENSMUSG00000109618	RP24-306C18.9	7:102677581-102687327	OK	0.778824	0.473265	-0.718649	-0.49014	0.37335	0.999642	no	0.534195	1.22134	0.58094	0.38253	0.717244	0.410758
ENSMUSG00000033227	Wnt6	1:74771891-74785322	OK	12.9618	7.87656	-0.718628	-2.78314	5e-05	0.002075	yes	14.1874	11.352	13.346	5.7545	9.87383	10.1234
ENSMUSG00000024211	Grm8	6:27275118-28135178	OK	0.352635	0.214334	-0.718319	-0.76557	0.08075	0.587037	no	0.32425	0.353101	0.380555	0.143183	0.276273	0.294696
ENSMUSG00000084845	Tmem240	4:155734799-155740564	OK	0.64241	0.390477	-0.718255	-0.980434	0.06945	0.540578	no	0.586939	0.603543	0.736747	0.196652	0.643076	0.525528
ENSMUSG00000060128	Gm2710	1:172669033-172669636	OK	0.302653	0.183978	-0.718126	-0.643908	0.31425	0.990138	no	0.175921	0.129105	0.602932	0.242618	0.120417	0.130261
ENSMUSG00000028332	Hemgn	4:46393988-46413506	OK	8.99433	5.48366	-0.713876	-3.27281	5e-05	0.002075	yes	6.81759	10.6245	9.54092	4.63527	6.2385	6.42561
ENSMUSG00000025270	Alas2	X:150519518-150643878	OK	21.4051	13.0526	-0.713623	-2.2369	5e-05	0.002075	yes	15.3624	24.3721	24.4809	12.0052	15.5819	12.618
ENSMUSG00000100215	Gm8292	1:55248657-55363469	OK	1.15577	0.705344	-0.712451	-0.642504	0.21455	0.894775	no	0.728034	1.33573	1.40354	0.627536	0.62292	0.943384
ENSMUSG00000075410	Gm11744	11:116645594-116668389	OK	0.663081	0.404849	-0.7118	-0.503201	0.2847	0.966261	no	0.675319	0.793246	0.520677	0.447937	0.242533	0.480989
ENSMUSG00000028539	Artn	4:117926161-117929763	OK	1.12665	0.688423	-0.710668	-0.790995	0.12005	0.702397	no	0.688174	0.895655	1.79611	0.902775	0.355992	0.59215
ENSMUSG00000020258	Glyctk	9:106148686-106160201	OK	1.44585	0.883564	-0.710514	-0.609252	0.2015	0.87861	no	1.61815	1.33435	1.38506	0.823125	1.11202	0.775983
ENSMUSG00000038020	Rapgefl1	11:98836784-98853697	OK	1.87919	1.14885	-0.709929	-1.91981	0.00045	0.0142116	yes	1.61405	1.95402	2.06951	0.959239	1.16044	1.51646
ENSMUSG00000050761	Gp1bb	16:18620318-18629938	OK	0.866587	0.530318	-0.708488	-0.486668	0.33655	0.999642	no	0.863522	0.687067	1.04917	0.381604	0.852981	0.505081
ENSMUSG00000029797	Sspo	6:48448228-48501250	OK	0.84757	0.518697	-0.708442	-0.849963	0.08365	0.596824	no	1.06425	0.926882	0.551575	0.393789	0.653925	0.633285
ENSMUSG00000094935	Gm9726	12:93927003-93929102	OK	0.299373	0.183219	-0.708372	-1.24615	0.02035	0.250837	no	0.30954	0.286228	0.302351	0.153682	0.177978	0.247535
ENSMUSG00000089951	Gm14435	2:176423593-176435761	OK	0.797485	0.488122	-0.708215	-0.848883	0.0582	0.492716	no	0.533145	0.762965	1.09634	0.661748	0.273701	0.355291
ENSMUSG00000066842	Hmcn1	1:150562523-150993435	OK	7.56094	4.63058	-0.707371	-0.913565	0.0838	0.59712	no	7.06509	9.52032	6.0974	4.28764	5.3143	4.63275
ENSMUSG00000101450	Gm28941	1:82586920-82752394	OK	0.420298	0.25756	-0.706504	-0.231479	0.76495	0.999642	no	0.403637	0.412594	0.444663	0.29822	0.177613	0.256186
ENSMUSG00000047363	Cstad	2:30595039-30608943	OK	0.31318	0.191951	-0.706258	-0.655287	0.18805	0.860822	no	0.240835	0.307049	0.391658	0.157602	0.156443	0.296156
ENSMUSG00000022840	Adcy5	16:35154876-35305737	OK	1.08343	0.664567	-0.705115	-2.57511	5e-05	0.002075	yes	1.11461	1.04464	1.09103	0.596077	0.772392	0.693722
ENSMUSG00000025930	Msc	1:14752936-14776931	OK	2.4644	1.51208	-0.704698	-1.70546	0.00175	0.042507	yes	2.64763	1.87072	2.87486	1.45699	1.5833	1.55107
ENSMUSG00000063506	Arhgap22	14:33214025-33370143	OK	2.98117	1.83022	-0.703866	-1.00215	0.0641	0.519245	no	2.95639	2.29331	3.69383	1.9444	2.06859	1.36348
ENSMUSG00000032596	Uba7	9:107975504-108048782	OK	5.19675	3.1909	-0.703647	-0.405537	0.40265	0.999642	no	5.03346	5.58423	4.97255	2.48166	3.82769	3.97258
ENSMUSG00000048834	Vstm2a	11:16257723-16427310	OK	0.482423	0.296438	-0.702568	-0.89235	0.06105	0.507225	no	0.519366	0.549682	0.37822	0.258947	0.307136	0.360722
ENSMUSG00000083061	Gm12191	11:49671502-49712723	OK	45.5901	28.0443	-0.70101	-0.467218	0.37115	0.999642	no	51.5337	51.6042	33.6322	22.4175	44.3405	23.0019
ENSMUSG00000032013	Trim29	9:43310762-43336125	OK	2.47577	1.52339	-0.700591	-2.47086	5e-05	0.002075	yes	2.6721	2.12496	2.63026	1.22942	1.79845	1.83629
ENSMUSG00000040525	Cblc	7:19778880-19796809	OK	1.76866	1.08841	-0.700431	-0.88607	0.0997	0.653989	no	0.968322	2.30147	2.03619	0.621641	1.69808	1.41229
ENSMUSG00000087221	BC037032	15:4020113-4155344	OK	0.586148	0.360873	-0.699773	-0.209164	0.4721	0.999642	no	0.400637	0.47193	0.885877	0.189791	0.415223	0.648688
ENSMUSG00000045934	Mtmr11	3:96162003-96177564	OK	7.172	4.41753	-0.699137	-0.609863	0.25575	0.939501	no	5.95878	8.40887	7.14834	3.80942	6.02442	4.02685
ENSMUSG00000029757	Dync1i1	6:5725638-6028039	OK	1.71894	1.05891	-0.698941	-1.39848	0.00555	0.101516	no	1.59382	1.41195	2.15105	1.00358	1.14269	1.08579
ENSMUSG00000086459	1700030C12Rik	11:23306894-23499661	OK	0.347109	0.213906	-0.698416	-0.0827948	0.59385	0.999642	no	0.766511	0.0786348	0.196183	0.170569	0.514485	0
ENSMUSG00000058589	Anks1b	10:89873508-90973300	OK	2.03529	1.25609	-0.696299	-0.868765	0.07025	0.54424	no	0.857045	1.14597	4.10287	1.19191	1.647	0.993532
ENSMUSG00000106883	Gm43632	6:127411129-127411733	OK	0.571546	0.353031	-0.695077	-0.782173	0.14795	0.771367	no	0.350966	0.38635	0.977324	0.423524	0.240234	0.324841
ENSMUSG00000097657	Gm7389	8:3994625-3997509	OK	0.755597	0.467005	-0.694179	-1.75579	0.00145	0.0366203	yes	1.05957	0.318109	0.889109	0.353246	0.782216	0.379313
ENSMUSG00000020191	4930415F15Rik	11:11279625-11515192	OK	0.583116	0.360586	-0.693439	-0.520684	0.2917	0.969188	no	0.373353	0.896148	0.479846	0.270363	0.570276	0.331343
ENSMUSG00000020866	Cacna1g	11:94408390-94474198	OK	22.3865	13.8685	-0.690818	-1.43248	0.0079	0.131404	no	21.3817	21.1896	24.5883	13.0339	13.7252	15.6811
ENSMUSG00000069917	Hba-a2	11:32296488-32297298	OK	5.16448	3.20167	-0.689802	-1.71546	0.0022	0.0506798	no	4.07583	5.14873	6.26889	3.80115	2.60694	2.59742
ENSMUSG00000005373	Mlxipl	5:135089889-135138382	OK	2.18514	1.35528	-0.689135	-1.19863	0.01775	0.228509	no	2.31708	1.95645	2.2819	1.17669	1.63776	1.42998
ENSMUSG00000044034	Npb	11:120608476-120609093	OK	0.364989	0.226381	-0.689097	-0.40677	0.27195	0.955124	no	0.358551	0.38077	0.355646	0.225469	0.147243	0.307343
ENSMUSG00000030771	Micalcl	7:112368307-112413106	OK	0.278496	0.172811	-0.688461	-0.703488	0.17295	0.828725	no	0.0780277	0.220876	0.536583	0.107731	0.3213	0.154481
ENSMUSG00000030589	Rasgrp4	7:29134850-29156920	OK	0.977922	0.606896	-0.688269	-0.78462	0.09055	0.623173	no	0.750034	1.17129	1.01244	0.547713	0.746749	0.585411
ENSMUSG00000097714	Gm20109	17:28522380-28523148	OK	0.381023	0.236576	-0.687572	-0.681149	0.1835	0.852326	no	0.250638	0.441451	0.450979	0.207397	0.308809	0.222702
ENSMUSG00000103477	5930409G06Rik	3:45273423-45274967	OK	0.584198	0.362848	-0.687092	-1.32343	0.0174	0.226118	no	0.525131	0.327575	0.899887	0.271584	0.305532	0.602692
ENSMUSG00000083481	Rps8-ps2	2:175804982-175805606	OK	0.595802	0.370091	-0.686955	-0.856356	0.1057	0.669934	no	0.222873	0.920035	0.644498	0.230528	0.400458	0.618849
ENSMUSG00000033377	Palmd	3:116918257-116984406	OK	1.49163	0.927009	-0.686234	-1.07064	0.04155	0.402511	no	1.61645	1.7488	1.10964	0.702867	1.23344	1.06886
ENSMUSG00000069919	Hba-a1	11:32283510-32284465	OK	835.634	520.113	-0.684047	-4.09367	5e-05	0.002075	yes	698.281	853.217	955.404	537.938	538.819	465.757
ENSMUSG00000045662	Henmt1	3:108939872-108960774	OK	0.333007	0.207659	-0.681338	-0.688681	0.0802	0.583809	no	0.315874	0.341008	0.342139	0.188491	0.294183	0.15947
ENSMUSG00000098449	Gm7467	5:76304875-76305527	OK	0.526064	0.328339	-0.680051	-0.829822	0.15085	0.778135	no	0.417974	0.690172	0.470045	0.270207	0.482796	0.290146
ENSMUSG00000081263	Gm14859	X:102208401-102208758	OK	0.437814	0.273314	-0.67976	-0.446405	0.5357	0.999642	no	0.757352	0.166742	0.38935	0.313346	0.466564	0
ENSMUSG00000046334	Gm6195	1:9798106-9900845	OK	0.438696	0.273891	-0.679617	-0.233391	0.73585	0.999642	no	0.454411	0.667001	0.194675	0.470019	0.155527	0
ENSMUSG00000030222	Rerg	6:137054824-137170497	OK	3.42717	2.14089	-0.678809	-1.59769	0.0014	0.03574	yes	2.87995	4.08484	3.31672	1.77005	2.29944	2.72402
ENSMUSG00000030077	Chl1	6:103510585-103750211	OK	0.557236	0.348104	-0.67877	-1.28472	0.01385	0.197207	no	0.416719	0.540927	0.714064	0.136194	0.519012	0.601016
ENSMUSG00000057897	Camk2b	11:5969643-6066362	OK	0.67292	0.420436	-0.678548	-1.1408	0.0064	0.112696	no	0.68452	0.646508	0.687731	0.325179	0.47853	0.552857
ENSMUSG00000038259	Gdf5	2:155940727-155945367	OK	0.432745	0.270874	-0.675894	-1.38151	0.01085	0.165322	no	0.343768	0.598158	0.356308	0.217933	0.364347	0.283282
ENSMUSG00000069814	Ccdc92b	11:74619604-74641516	OK	0.749095	0.469186	-0.674989	-1.91846	0.00045	0.0142116	yes	0.747788	0.768755	0.730741	0.415502	0.55839	0.487348
ENSMUSG00000030730	Atp2a1	7:126428758-126463108	OK	0.390204	0.244444	-0.674725	-0.45775	0.3197	0.995191	no	0.385196	0.468212	0.317205	0.185431	0.407799	0.199115
ENSMUSG00000096255	Dynlt1b	17:6310546-6493180	OK	5.34427	3.34836	-0.674536	-1.15324	0.0338	0.350015	no	3.73752	4.66293	7.63236	2.96385	2.89943	4.56633
ENSMUSG00000061762	Tac1	6:7554878-7565834	OK	1.1542	0.723216	-0.674401	-1.14441	0.02715	0.303613	no	1.1308	1.17411	1.1577	0.42971	1.02381	1.00963
ENSMUSG00000056055	Sag	1:87803679-87845158	OK	1.04941	0.657785	-0.673885	-1.53937	0.00165	0.0406762	yes	0.927147	1.13286	1.08821	0.643536	0.561975	0.782091
ENSMUSG00000069125	Rps24-ps2	3:3791897-3792292	OK	0.405485	0.254405	-0.672519	-0.469601	0.4266	0.999642	no	0.365897	0.537049	0.313509	0.378465	0.125227	0.135464
ENSMUSG00000031755	Bbs2	8:94067953-94098928	OK	11.3696	7.14507	-0.670155	-1.59148	0.0034	0.07055	no	12.5801	13.7864	7.74216	6.9053	8.7588	6.01089
ENSMUSG00000101932	Gm10074	17:36226022-36226271	OK	1.14553	0.7205	-0.668952	-0.377537	0.5514	0.999642	no	1.1866	1.74165	0.508354	0.40912	1.62445	0.43931
ENSMUSG00000058700	Rpl21-ps12	6:90656087-90988685	OK	0.534089	0.336077	-0.668288	-0.198882	0.76435	0.999642	no	0.592491	0.465867	0.54391	0.350188	0.173807	0.470124
ENSMUSG00000097649	Gm10561	1:55170158-55235622	OK	1.79124	1.12728	-0.66811	-0.854338	0.11595	0.694193	no	1.76441	1.75471	1.85459	0.823333	1.72584	1.13661
ENSMUSG00000036602	Alx1	10:103007845-103029054	OK	58.9004	37.0727	-0.667918	-3.93279	5e-05	0.002075	yes	53.4565	56.0758	67.1688	32.5593	40.5073	42.665
ENSMUSG00000028111	Ctsk	3:95499255-95509362	OK	2.24447	1.41304	-0.667578	-1.8903	0.00055	0.0170438	yes	1.99047	1.95427	2.78868	0.890307	2.09893	1.77259
ENSMUSG00000009876	Cox4i2	2:152754172-152765037	OK	4.79994	3.02225	-0.667391	-1.83583	0.0008	0.0233044	yes	4.61179	4.09098	5.69705	3.05663	2.94221	3.03354
ENSMUSG00000044816	D630023F18Rik	1:65100388-65123214	OK	0.405678	0.255526	-0.666867	-0.905716	0.05815	0.492545	no	0.329967	0.389353	0.497714	0.172526	0.3849	0.29215
ENSMUSG00000105884	Gm22711	11:106501242-106501377	OK	28.4021	17.9158	-0.664764	-0.751938	0.1524	0.781494	no	9.72482	25.1729	50.3085	26.9573	3.31116	14.4375
ENSMUSG00000103925	B230112G18Rik	8:23208511-23209362	OK	0.391991	0.247819	-0.661532	-0.809796	0.1219	0.708203	no	0.398334	0.358768	0.41887	0.224736	0.260265	0.28154
ENSMUSG00000019890	Nts	10:102481759-102490418	OK	0.839741	0.531212	-0.660656	-1.29621	0.01705	0.22315	no	0.699534	0.796615	1.02307	0.299405	0.668708	0.857331
ENSMUSG00000095419	Gm14328	18:74283089-74359986	OK	0.991639	0.627363	-0.660515	-0.629009	0.2624	0.945476	no	1.48568	0.754832	0.734403	0.472835	1.05606	0.507727
ENSMUSG00000026398	Nr5a2	1:136842570-136960448	OK	1.03287	0.654114	-0.659038	-1.25405	0.0138	0.196835	no	0.96285	1.0905	1.04525	0.450652	0.836564	0.878589
ENSMUSG00000021416	Eci3	13:34924408-34963810	OK	0.27247	0.172644	-0.658296	-0.781734	0.1368	0.745718	no	0.167399	0.221078	0.428932	0.178601	0.105491	0.227884
ENSMUSG00000078877	Gm14295	2:176798611-176811223	OK	21.7907	13.8079	-0.658218	-0.833809	0.12965	0.726401	no	17.7184	24.6286	23.0252	13.7346	15.3921	12.3705
ENSMUSG00000078937	Cpt1b	15:89416404-89430868	OK	2.39043	1.51508	-0.657877	-0.668614	0.17	0.822463	no	2.76228	2.22988	2.17913	1.15421	1.79755	1.95435
ENSMUSG00000070336	Fbxo47	11:97853825-97884154	OK	0.377191	0.239478	-0.655403	-0.957673	0.06655	0.528973	no	0.421092	0.390922	0.319559	0.291077	0.255343	0.120414
ENSMUSG00000071052	Rpl7a-ps5	17:57769569-58410342	OK	0.339137	0.21541	-0.654782	-0.748793	0.15425	0.787801	no	0.23309	0.384886	0.399434	0.0803655	0.398873	0.302036
ENSMUSG00000030087	Klf15	6:90462575-90475238	OK	3.11117	1.97859	-0.652987	-2.29325	5e-05	0.002075	yes	3.03283	3.23611	3.06458	2.08388	2.08223	1.66436
ENSMUSG00000102914	Gm35106	3:65968901-65969151	OK	0.645535	0.410852	-0.651877	-0.391192	0.35125	0.999642	no	0	0.430111	1.50649	0.404139	0.401167	0.433962
ENSMUSG00000068686	Cd59b	2:104069848-104091187	OK	2.94476	1.87435	-0.651759	-1.19979	0.02575	0.293117	no	2.93467	3.05108	2.84854	1.45012	2.12743	2.46974
ENSMUSG00000087413	Gm11266	4:82290172-82705750	OK	0.327217	0.208279	-0.651728	-0.352049	0.5222	0.999642	no	0.263724	0.435471	0.282456	0.159123	0.270777	0.244094
ENSMUSG00000099980	Gm5619	9:85781867-85782627	OK	0.663036	0.422044	-0.651693	-1.00495	0.06375	0.518444	no	0.589735	0.695563	0.703809	0.392137	0.389254	0.514647
ENSMUSG00000097373	Gm26877	13:41309915-41487320	OK	0.541191	0.344743	-0.650619	-0.264327	0.6922	0.999642	no	0.38196	0.540478	0.701135	0.169351	0.616133	0.424136
ENSMUSG00000098113	Gm2445	13:98402094-98403083	OK	0.500426	0.318835	-0.650348	-1.01656	0.0577	0.491	no	0.597155	0.558756	0.345367	0.401483	0.306562	0.165811
ENSMUSG00000087029	Gm14133	2:149743174-149798743	OK	0.273272	0.174237	-0.649289	-0.429626	0.2576	0.940005	no	0.284901	0.33775	0.197166	0.113341	0.202514	0.267751
ENSMUSG00000071867	Gm6304	18:14968684-15151446	OK	0.316156	0.20167	-0.648638	-0.159649	0.74685	0.999642	no	0.38427	0.317259	0.246938	0.0993672	0.394547	0.2134
ENSMUSG00000066362	Rps13-ps1	8:87047688-87048226	OK	54.1017	34.516	-0.648408	-2.28129	5e-05	0.002075	yes	10.2206	8.39975	143.685	9.91998	109.827	8.39721
ENSMUSG00000058620	Adra2b	2:127363207-127367221	OK	0.590619	0.376826	-0.648329	-1.74433	0.00165	0.0406762	yes	0.542135	0.704321	0.525401	0.395087	0.367864	0.349267
ENSMUSG00000040265	Dnm3	1:161942085-162479943	OK	2.0742	1.3238	-0.647869	-0.564375	0.2623	0.945476	no	1.86631	2.16288	2.19341	0.941082	1.57732	1.83572
ENSMUSG00000054342	Kcnn4	7:24370262-24386690	OK	0.983905	0.628072	-0.647589	-1.06411	0.0287	0.314975	no	0.747441	0.880284	1.32399	0.567945	0.667101	0.709297
ENSMUSG00000004630	Pcp2	8:3621547-3625848	OK	0.93699	0.598309	-0.647143	-0.354612	0.4782	0.999642	no	0.614278	1.16701	1.02968	0.548749	0.890038	0.4057
ENSMUSG00000045954	Sdpr	1:51218385-51333779	OK	2.72038	1.73729	-0.646964	-2.39659	5e-05	0.002075	yes	2.60126	2.87258	2.68728	1.42194	2.01157	2.09373
ENSMUSG00000078097	Gm10913	16:36209276-36209739	OK	0.302274	0.193064	-0.64678	-0.459318	0.42195	0.999642	no	0.360661	0.198511	0.34765	0.0932621	0.185153	0.400577
ENSMUSG00000060044	Tmem26	10:68723745-68782654	OK	2.72151	1.73925	-0.645941	-2.72173	5e-05	0.002075	yes	2.29025	2.78765	3.08663	1.31717	2.05321	2.26945
ENSMUSG00000040694	Apobec2	17:48419230-48432728	OK	0.313198	0.200197	-0.645653	-0.919811	0.09225	0.630146	no	0.27749	0.305466	0.356639	0.119592	0.356138	0.205467
ENSMUSG00000051435	Fhad1	4:141885653-142015082	OK	0.309552	0.1979	-0.645414	-0.459205	0.18945	0.862975	no	0.33215	0.348876	0.247631	0.161784	0.157177	0.310854
ENSMUSG00000090136	Gm10177	9:37229148-37255738	OK	2.84599	1.82128	-0.643982	-0.464701	0.3547	0.999642	no	2.86218	2.30778	3.36802	1.86971	1.0911	2.45459
ENSMUSG00000110070	RP23-218K15.10	7:45339121-45370583	OK	0.383786	0.245867	-0.642424	-0.244859	0.76545	0.999642	no	0.79371	0.0794303	0.278218	0.149267	0.44451	0.240424
ENSMUSG00000069833	Ahnak	19:8989283-9076919	OK	1.93468	1.23959	-0.642232	-1.59722	0.0065	0.11385	no	1.37845	1.9399	2.4857	1.13332	1.26947	1.42226
ENSMUSG00000101279	Gm18342	1:84990637-85342615	OK	0.368281	0.235988	-0.642093	-0.299771	0.64665	0.999642	no	0	0.736382	0.368462	0.0494237	0.0490592	0.796047
ENSMUSG00000046088	Gm9805	17:22689770-22689941	OK	6.22168	3.98908	-0.641247	-0.47056	0.3636	0.999642	no	6.94209	4.58519	7.13776	2.87221	7.12774	3.08416
ENSMUSG00000026389	Steap3	1:120190756-120272705	OK	1.90183	1.2199	-0.640631	-2.0831	0.0002	0.00702851	yes	1.71835	2.04885	1.9383	1.16255	1.29077	1.26371
ENSMUSG00000075576	Gm12359	11:98795515-98833814	OK	0.674968	0.432985	-0.640503	-0.121836	0.48005	0.999642	no	0.77646	0.578648	0.669797	0.316868	0.558765	0.539439
ENSMUSG00000022510	Trp63	16:25683762-25892102	OK	11.0917	7.11754	-0.640035	-3.08659	5e-05	0.002075	yes	11.0766	9.85133	12.3473	6.5267	7.46305	7.95371
ENSMUSG00000044022	Pcdhb21	18:36930183-37841873	OK	0.2555	0.164083	-0.638904	-0.187753	0.7426	0.999642	no	0.212097	0.215373	0.339032	0.125803	0.179065	0.225658
ENSMUSG00000081932	Gm12331	11:74069954-74087292	OK	0.598063	0.384515	-0.637258	-0.81003	0.1195	0.701841	no	0.951726	0.554654	0.287809	0.405348	0.229924	0.49744
ENSMUSG00000025889	Snca	6:60731574-60829855	OK	7.22172	4.64346	-0.637143	-2.32347	5e-05	0.002075	yes	6.4102	7.37549	7.87946	4.36381	5.52533	4.32088
ENSMUSG00000051331	Cacna1c	6:118587239-119221616	OK	2.48358	1.59728	-0.636802	-1.20629	0.0233	0.275678	no	2.43346	2.66959	2.3477	1.19962	2.33504	1.65484
ENSMUSG00000025081	Tdrd1	19:56826208-56870012	OK	0.342245	0.220166	-0.636439	-1.53056	0.0046	0.0880396	no	0.280689	0.353081	0.392966	0.181454	0.26761	0.250146
ENSMUSG00000046854	Pip5kl1	2:32574183-32583782	OK	0.932454	0.600371	-0.635178	-1.08459	0.0361	0.365806	no	0.888092	0.738657	1.17061	0.589749	0.563763	0.658224
ENSMUSG00000086496	Gm14204	2:158595471-158610723	OK	2.35969	1.51951	-0.634993	-0.850397	0.0816	0.589583	no	1.87042	2.50318	2.70548	0.738944	2.5109	2.08924
ENSMUSG00000053461	Hhipl2	1:183418214-183436808	OK	0.628243	0.404628	-0.634727	-0.623387	0.35875	0.999642	no	1.05336	0.616576	0.214798	0.138295	0.620841	0.721081
ENSMUSG00000060131	Atp8b4	2:126320972-126500674	OK	0.622214	0.400802	-0.634519	-1.31875	0.01145	0.170994	no	0.53049	0.632293	0.703859	0.318496	0.448488	0.517729
ENSMUSG00000027907	S100a11	3:93520487-93526287	OK	71.3886	45.9867	-0.634478	-3.02823	5e-05	0.002075	yes	61.8196	61.3476	90.9987	44.8073	46.9793	47.3528
ENSMUSG00000073400	Trim10	17:36869573-36877833	OK	3.31978	2.13852	-0.634474	-2.28089	5e-05	0.002075	yes	2.43726	4.04979	3.47229	2.15234	2.21914	2.03025
ENSMUSG00000030088	Aldh1l1	6:90486392-90600203	OK	0.757511	0.488055	-0.634223	-0.70261	0.08855	0.616342	no	0.861091	0.578701	0.832741	0.443462	0.490733	0.574562
ENSMUSG00000057777	Mab21l2	3:86224679-86782692	OK	43.6798	28.1521	-0.633725	-2.74344	5e-05	0.002075	yes	45.8484	44.06	41.1309	25.4423	30.7195	31.0042
ENSMUSG00000030669	Calca	7:114631477-114636357	OK	1.4675	0.945936	-0.633542	-0.900255	0.0563	0.484327	no	1.22436	1.57225	1.60588	0.957297	1.12472	0.744433
ENSMUSG00000021186	Fbln5	12:101746564-101819055	OK	2.37974	1.53429	-0.633232	-2.69715	5e-05	0.002075	yes	2.2494	2.50835	2.38146	1.45471	1.62398	1.60377
ENSMUSG00000101482	Gm28883	1:135869781-135870150	OK	1.56019	1.00604	-0.63304	-0.836182	0.116	0.694193	no	0.985484	1.70475	1.99033	1.01933	0.578193	1.40728
ENSMUSG00000014361	Mertk	2:128698955-128802894	OK	5.07177	3.2715	-0.632538	-2.69877	5e-05	0.002075	yes	4.66791	5.48956	5.05783	2.98611	3.5139	3.59986
ENSMUSG00000035246	Pcyt1b	X:93654862-93749951	OK	4.34067	2.80121	-0.631869	-1.0742	0.03885	0.384934	no	3.42815	5.17186	4.42199	2.00159	3.20696	3.99468
ENSMUSG00000026100	Mstn	1:53061639-53068079	OK	0.991766	0.640155	-0.631579	-1.73188	0.0011	0.029932	yes	1.33241	0.846953	0.795933	0.737618	0.491346	0.594037
ENSMUSG00000092167	Gm3696	14:7083207-7100621	OK	1.33059	0.859061	-0.631237	-1.03264	0.06195	0.510338	no	1.52544	1.39125	1.07509	0.934947	0.930682	0.63567
ENSMUSG00000083780	Gm12728	4:105789868-105794711	OK	2.7396	1.76904	-0.630999	-0.527794	0.3177	0.99448	no	2.43637	2.11395	3.66847	1.98262	0.978029	2.13288
ENSMUSG00000051839	Gypa	8:80493780-80510542	OK	10.0733	6.50511	-0.630894	-2.82821	5e-05	0.002075	yes	8.14836	10.9021	11.1695	6.15512	6.78386	6.92633
ENSMUSG00000091957	Rps2-ps10	18:61220481-61289924	OK	59.1112	38.1845	-0.630443	-3.21152	5e-05	0.002075	yes	64.5826	71.2294	41.5216	17.6479	76.8396	40.6027
ENSMUSG00000074852	Hpse2	19:42788946-43388311	OK	3.19803	2.06624	-0.630177	-2.09908	5e-05	0.002075	yes	3.06836	2.98419	3.54154	1.72553	2.43163	2.38226
ENSMUSG00000001025	S100a6	3:90612881-90624181	OK	17.0372	11.0082	-0.630111	-1.74889	0.00135	0.0349498	yes	11.0839	19.6711	20.3566	10.3528	12.656	10.6712
ENSMUSG00000071984	Fndc1	17:7738568-7827302	OK	0.670093	0.433011	-0.629959	-0.692483	0.15165	0.779827	no	0.597792	0.601302	0.811185	0.301759	0.527042	0.601481
ENSMUSG00000029372	Ppbp	5:90768517-90770063	OK	4.14204	2.6772	-0.629614	-1.91402	0.0007	0.0207948	yes	3.06704	4.6974	4.66168	2.01377	3.42289	3.25838
ENSMUSG00000023993	Treml1	17:48359915-48367174	OK	0.730382	0.473025	-0.626736	-1.21574	0.0277	0.308095	no	0.42675	0.840651	0.923745	0.487872	0.691836	0.224518
ENSMUSG00000066270	Gm10157	9:118606689-119043998	OK	1.09185	0.707533	-0.625904	-0.140935	0.74375	0.999642	no	1.6603	0.548308	1.06694	0.343468	0.852351	1.29085
ENSMUSG00000093456	Gm20662	9:107975504-108048782	OK	0.463392	0.300443	-0.62514	-0.101709	0.60065	0.999642	no	0.394157	0.443117	0.552902	0.309271	0.434672	0.14856
ENSMUSG00000022512	Cldn1	16:26356641-26371841	OK	1.85378	1.20274	-0.624139	-2.14227	0.0001	0.00392328	yes	1.6428	1.63863	2.2799	1.07698	1.44917	1.20785
ENSMUSG00000042333	Tnfrsf14	4:154922209-154928563	OK	1.9788	1.2843	-0.623645	-0.853611	0.1018	0.66172	no	1.01392	2.54472	2.37776	1.31099	1.80295	0.712267
ENSMUSG00000038836	Agbl3	6:34780431-34859459	OK	3.43584	2.22997	-0.623639	-1.45294	0.00825	0.135587	no	2.91896	3.78917	3.59939	1.80831	2.44887	2.85439
ENSMUSG00000086320	Gm12840	4:117700187-117700923	OK	0.291918	0.189467	-0.62362	-0.520992	0.3167	0.993121	no	0.276622	0.243609	0.355523	0.0572246	0.397627	0.24579
ENSMUSG00000060808	B9d1os	11:61504385-61505059	OK	0.323768	0.210167	-0.623424	-0.62526	0.26705	0.951086	no	0.249043	0.274151	0.448109	0.103039	0.357984	0.276606
ENSMUSG00000045709	Smkr-ps	6:29985328-29993776	OK	0.3112	0.202102	-0.622758	-0.573979	0.25975	0.9423	no	0.460542	0.211465	0.261593	0.15894	0.262954	0.227574
ENSMUSG00000031661	Nkd1	8:88521353-88594884	OK	20.4684	13.2934	-0.622684	-2.97926	5e-05	0.002075	yes	21.096	18.5086	21.8007	12.6962	13.7389	14.0426
ENSMUSG00000078868	Gm14412	2:177314519-177324307	OK	0.353604	0.229722	-0.622243	-1.04538	0.054	0.474172	no	0.238483	0.318783	0.503546	0.176196	0.244861	0.321637
ENSMUSG00000082192	Gm14719	X:49660959-49661299	OK	0.409142	0.265884	-0.621805	-0.306772	0.4741	0.999642	no	0.169493	0.186581	0.871351	0.350629	0.174026	0.188252
ENSMUSG00000058794	Nfe2	15:103248211-103258403	OK	3.31025	2.15172	-0.621451	-1.41654	0.00625	0.110882	no	2.42418	3.79161	3.71495	2.03388	1.81681	2.72229
ENSMUSG00000073940	Hbb-bt	7:103812523-103813996	OK	63.7798	41.466	-0.62117	-3.16996	5e-05	0.002075	yes	62.3125	84.4006	44.6263	40.9139	29.0025	55.0337
ENSMUSG00000077575	Gm24888	7:109519146-109522367	OK	21.4399	13.9437	-0.620684	-0.0965531	0.67145	0.999642	no	22.8207	17.3651	24.1338	15.5382	12.1847	12.5136
ENSMUSG00000025977	Boll	1:55248657-55363469	OK	0.875077	0.569146	-0.620611	-0.765314	0.48525	0.999642	no	0.278107	2.34712	0	0.0532484	1.97747	0.19262
ENSMUSG00000020388	Pdlim4	11:54054927-54069014	OK	39.2425	25.526	-0.620448	-2.93009	5e-05	0.002075	yes	38.5172	37.6281	41.5823	23.8779	27.8324	26.516
ENSMUSG00000052217	Hbb-bh1	7:103841636-103843164	OK	3091.59	2011.6	-0.620007	-3.25785	5e-05	0.002075	yes	2231.94	3335.59	3707.25	2058.52	2058.89	1870.47
ENSMUSG00000058050	Gm9234	7:121015141-121015633	OK	2.16793	1.41081	-0.619794	-1.13917	0.03835	0.381123	no	1.94713	2.05413	2.50252	1.09092	1.7493	1.71209
ENSMUSG00000108466	Gm44771	6:71831084-71877388	OK	0.289198	0.188227	-0.619585	-0.08915	0.67385	0.999642	no	0.277275	0.30523	0.285091	0.22945	0.170814	0.123195
ENSMUSG00000079137	Rpl27-ps1	1:171305086-171305494	OK	3.95422	2.574	-0.619383	-1.2447	0.02405	0.281926	no	3.19993	4.40319	4.25954	2.83701	2.46413	2.15784
ENSMUSG00000110408	RP23-357C16.1	9:117708191-117872584	OK	0.300575	0.195678	-0.619243	-0.419524	0.4334	0.999642	no	0.298719	0.411044	0.191962	0.231734	0.153354	0.16589
ENSMUSG00000047786	Lix1	17:17402671-17459387	OK	41.2343	26.8564	-0.61858	-3.74382	5e-05	0.002075	yes	38.1898	38.8515	46.6614	24.611	28.2984	29.9049
ENSMUSG00000081810	Gm11878	4:22519627-22520027	OK	0.379974	0.247547	-0.6182	-0.455345	0.53945	0.999642	no	0.594471	0.392644	0.152807	0.245956	0.366222	0.132053
ENSMUSG00000035228	Ccdc106	7:5007058-5062049	OK	7.74857	5.04834	-0.618123	-0.444617	0.2721	0.955124	no	5.51803	8.35477	9.37292	4.82741	6.05112	4.4874
ENSMUSG00000026532	Spta1	1:174172775-174248450	OK	1.25671	0.819018	-0.61769	-2.394	5e-05	0.002075	yes	0.900164	1.43839	1.43159	0.65947	0.926874	1.03026
ENSMUSG00000036743	Psma8	18:14706150-14762299	OK	0.715705	0.46698	-0.616003	-1.32164	0.01605	0.214654	no	0.582913	0.93651	0.627691	0.407389	0.388218	0.664926
ENSMUSG00000009941	Nxf2	X:134944525-134964754	OK	0.344246	0.224643	-0.615806	-1.12601	0.0275	0.306283	no	0.278321	0.361228	0.393187	0.183906	0.239551	0.291209
ENSMUSG00000006205	Htra1	7:130162450-133124354	OK	1.91884	1.25241	-0.615523	-0.0860554	0.4751	0.999642	no	1.71265	1.61123	2.43264	1.11973	1.19527	1.57492
ENSMUSG00000034435	Tmem30b	12:73543113-73546395	OK	2.77891	1.81828	-0.611945	-2.33644	5e-05	0.002075	yes	3.04239	2.50135	2.79299	1.61682	2.07467	1.96479
ENSMUSG00000028036	Ptgfr	3:151796501-151839955	OK	1.79825	1.17708	-0.611373	-0.609207	0.22995	0.913137	no	1.72481	2.16786	1.50207	1.276	1.19034	0.966005
ENSMUSG00000048709	Gm8666	X:75459962-75485753	OK	2.89145	1.89571	-0.609058	-0.81676	0.1132	0.687551	no	2.49429	3.29491	2.88517	2.06397	1.79269	1.66221
ENSMUSG00000084946	Dlx1as	2:71453275-71537891	OK	20.3043	13.3232	-0.60784	-0.855407	0.12735	0.719617	no	18.2945	20.5985	22.0198	8.04047	18.3323	18.8796
ENSMUSG00000019899	Lama2	10:26980035-27619758	OK	0.841967	0.55259	-0.607554	-0.95661	0.0269	0.301839	no	0.660749	0.944459	0.920692	0.493927	0.685138	0.537369
ENSMUSG00000028031	Dkk2	3:132085291-132180304	OK	6.77004	4.44332	-0.607528	-2.94994	5e-05	0.002075	yes	6.3354	6.43539	7.53933	3.47414	5.12126	5.70373
ENSMUSG00000078880	Gm14308	2:176613363-176636344	OK	0.306577	0.201276	-0.607074	-0.566999	0.22645	0.906635	no	0.359413	0.199463	0.360856	0.294176	0.14192	0.0748332
ENSMUSG00000034664	Itga2b	11:102453296-102470122	OK	2.27024	1.49053	-0.607024	-0.857127	0.0775	0.571459	no	2.1122	2.36434	2.33418	1.49598	1.69016	1.27999
ENSMUSG00000065147	Snora31	14:75845092-75848525	OK	34.2391	22.4941	-0.606103	-0.0479202	0.6652	0.999642	no	33.8	49.6103	19.3071	23.3073	30.848	12.5136
ENSMUSG00000026778	Prkcq	2:11172107-11301222	OK	1.40029	0.920248	-0.605626	-1.53533	0.003	0.0639368	no	0.759426	1.65989	1.78154	0.716547	1.16243	1.08546
ENSMUSG00000097877	Gm26703	5:104079110-104119687	OK	0.820887	0.539557	-0.605409	-0.398647	0.4515	0.999642	no	0.891198	0.897436	0.674027	0.471646	0.509243	0.705692
ENSMUSG00000045506	A930002H24Rik	17:63863299-63863791	OK	1.00619	0.661664	-0.604738	-0.855293	0.1124	0.685059	no	1.21696	1.07172	0.729902	0.671338	0.583102	0.720878
ENSMUSG00000086382	Chrna1os	2:73584849-73589208	OK	1.48232	0.974999	-0.604383	-0.975993	0.0718	0.550311	no	1.00171	1.8503	1.59494	0.97737	1.22686	0.718396
ENSMUSG00000087516	Tbx3os1	5:119570129-119684724	OK	7.2025	4.74145	-0.60317	-0.447144	0.3342	0.999642	no	7.47451	8.95706	5.17593	4.51867	3.45608	6.47237
ENSMUSG00000074580	4931440P22Rik	3:65507256-65555518	OK	0.535223	0.352394	-0.602947	-0.288692	0.5364	0.999642	no	0.687444	0.43561	0.482613	0.309885	0.522207	0.267602
ENSMUSG00000016386	Mpped2	2:106693268-106868356	OK	47.1253	31.0357	-0.602573	-2.32632	0.0001	0.00392328	yes	41.7629	43.7443	55.8687	24.4939	38.7163	36.4387
ENSMUSG00000082109	Rpl19-ps12	X:6027055-6092269	OK	1.63453	1.07729	-0.601464	-0.438814	0.40405	0.999642	no	1.20904	2.06295	1.6316	1.18804	0.993099	0.94
ENSMUSG00000062611	Rps3a2	14:88123016-88123808	OK	0.635496	0.418898	-0.601284	-0.922212	0.0829	0.594297	no	0.597555	0.438534	0.870398	0.412053	0.409024	0.44246
ENSMUSG00000029279	Brdt	5:107331158-107387058	OK	1.07627	0.709443	-0.601274	-1.26757	0.0134	0.192962	no	0.948966	1.13246	1.14737	0.715603	0.776508	0.630059
ENSMUSG00000031097	Tnni2	7:142441807-142444410	OK	1.48068	0.976103	-0.60115	-0.675617	0.1253	0.717359	no	1.11771	1.81686	1.50745	1.00845	1.15227	0.735237
ENSMUSG00000045658	Pid1	1:84036295-84364180	OK	4.94771	3.26183	-0.601077	-2.10534	5e-05	0.002075	yes	3.94935	5.34118	5.55259	2.51509	4.01868	3.99847
ENSMUSG00000082491	Gm5909	8:80110805-80112086	OK	0.45365	0.299299	-0.599989	-1.02899	0.05905	0.497363	no	0.609651	0.359526	0.391772	0.247732	0.290622	0.411111
ENSMUSG00000025498	Irf7	7:141228783-141266481	OK	0.285375	0.188394	-0.599109	-0.133597	0.37655	0.999642	no	0.0496274	0.559929	0.246569	0.187906	0.169399	0.208364
ENSMUSG00000086914	Gm16124	9:53614581-53681265	OK	0.569026	0.375949	-0.597959	-0.16367	0.75325	0.999642	no	0.524426	0.412356	0.770297	0.309965	0.384608	0.499258
ENSMUSG00000001510	Dlx3	11:95120118-95125296	OK	8.33803	5.50959	-0.597763	-2.81494	5e-05	0.002075	yes	9.68751	7.48214	7.84445	5.7273	5.20391	5.37984
ENSMUSG00000044313	Mab21l3	3:101813075-101848959	OK	1.17245	0.775047	-0.597175	-1.75156	0.0009	0.0254108	yes	1.05231	1.22101	1.24404	0.738787	0.82995	0.792664
ENSMUSG00000022112	Gpc5	14:115092214-116525179	OK	0.39063	0.258238	-0.597103	-1.0777	0.0438	0.414107	no	0.378717	0.330421	0.462752	0.261829	0.271492	0.237803
ENSMUSG00000046550	Spin2c	X:153832224-153834243	OK	26.805	17.7226	-0.596914	-2.70979	5e-05	0.002075	yes	23.6133	26.8379	29.9637	17.2225	18.2389	18.2063
ENSMUSG00000063838	1700027J19Rik	7:4151259-4164860	OK	21.4064	14.1562	-0.596605	-2.31131	5e-05	0.002075	yes	21.9697	18.4056	23.8438	12.2718	16.2007	15.8805
ENSMUSG00000014158	Trpv4	5:114622151-114658421	OK	0.318384	0.210629	-0.596063	-0.740477	0.08815	0.614854	no	0.249845	0.338576	0.366731	0.212765	0.210445	0.206541
ENSMUSG00000086255	Gm11534	11:95865942-95914891	OK	1.17239	0.775931	-0.595449	-0.381211	0.71965	0.999642	no	0.752932	0.828843	1.93539	0.778794	1.54614	0
ENSMUSG00000078853	Igtp	11:58199555-58222782	OK	1.00342	0.664296	-0.595028	-1.36788	0.0108	0.164865	no	0.855377	1.0655	1.08938	0.547304	0.874548	0.688029
ENSMUSG00000042662	Dusp15	2:152940996-152951698	OK	0.498872	0.330356	-0.594647	-0.620198	0.1948	0.869316	no	0.403893	0.502066	0.590657	0.241953	0.259194	0.578325
ENSMUSG00000029661	Col1a2	6:4504813-4541544	OK	58.6158	38.8179	-0.594566	-2.83208	5e-05	0.002075	yes	56.0232	60.5925	59.2317	33.0202	42.6606	46.5707
ENSMUSG00000042759	Apobr	7:126571206-126594941	OK	0.348335	0.230707	-0.594413	-0.373509	0.2775	0.959431	no	0.274692	0.418001	0.352311	0.234614	0.281355	0.172244
ENSMUSG00000048251	Bcl11b	12:107910402-108003602	OK	5.98315	3.96357	-0.594103	-2.45178	5e-05	0.002075	yes	6.10063	6.2469	5.60191	2.83917	5.32363	4.85232
ENSMUSG00000090053	Palm2	4:57434246-57896984	OK	2.63388	1.74497	-0.593989	-0.328004	0.49605	0.999642	no	3.16434	1.63216	3.10515	1.7597	1.16343	2.29704
ENSMUSG00000056222	Spock1	13:57421194-57908314	OK	0.953295	0.631573	-0.593973	-1.29184	0.0149	0.205772	no	1.25712	0.78063	0.822132	0.487076	0.627124	0.925017
ENSMUSG00000068614	Actc1	2:114009600-114068324	OK	2.66993	1.76888	-0.593971	-1.38183	0.00725	0.123835	no	2.43971	2.76706	2.80303	1.18528	2.7137	1.99124
ENSMUSG00000025494	Sigirr	7:141091174-141100572	OK	1.3329	0.883471	-0.593313	-0.737213	0.1213	0.706956	no	0.983398	1.71902	1.29628	0.981731	0.913146	0.657274
ENSMUSG00000074934	Grem1	2:113746163-113758646	OK	1.53006	1.01453	-0.592766	-2.07941	5e-05	0.002075	yes	1.59497	1.34304	1.65216	0.966459	0.928801	1.19642
ENSMUSG00000029416	Slc15a4	5:127595663-127709374	OK	29.0046	19.2329	-0.592707	-0.42049	0.4284	0.999642	no	21.9241	18.4292	46.6604	11.2251	21.5418	32.9394
ENSMUSG00000102246	9430037O13Rik	1:191535884-191536892	OK	0.31558	0.209442	-0.591455	-0.790198	0.14025	0.755571	no	0.320687	0.288834	0.33722	0.180928	0.119732	0.35618
ENSMUSG00000108255	Gm16499	6:53815467-53868183	OK	0.433803	0.288029	-0.590825	-0.190896	0.60815	0.999642	no	0.404343	0.484383	0.412683	0.258319	0.305262	0.330216
ENSMUSG00000091604	Gm17349	15:99702175-99713995	OK	1.0018	0.665567	-0.589939	-0.0773792	0.74425	0.999642	no	1.85568	0.255347	0.89437	0.239928	1.66715	0.515266
ENSMUSG00000004552	Ctse	1:131638305-131675505	OK	1.83741	1.22178	-0.588687	-1.74538	0.00125	0.0331933	yes	1.47897	1.97786	2.05539	1.02243	1.56773	1.27452
ENSMUSG00000090260	2810442N19Rik	1:161942085-162479943	OK	1.557	1.03571	-0.588146	-0.277885	0.62775	0.999642	no	1.33148	1.44397	1.89556	0.672375	0.942244	1.85586
ENSMUSG00000099112	Gm27406	15:102455525-102517064	OK	6.02652	4.00979	-0.587797	-0.0491626	0.6882	0.999642	no	8.06619	2.52405	7.48931	2.41986	4.7179	6.48154
ENSMUSG00000003271	Sult2b1	7:45729982-45804144	OK	0.838135	0.557824	-0.587372	-0.320916	0.4625	0.999642	no	0.838126	0.865233	0.811046	0.732911	0.502272	0.263203
ENSMUSG00000069267	Hist1h3b	13:23752266-23752886	OK	0.419416	0.279168	-0.587249	-0.588806	0.27455	0.957283	no	0.112504	0.928852	0.216891	0.349106	0.231026	0.187434
ENSMUSG00000109925	RP23-74O12.8	7:12768089-12803635	OK	170.832	113.714	-0.58717	-1.60377	0.0048	0.0913382	no	191.647	209.596	111.252	84.3765	96.1915	189.91
ENSMUSG00000053821	Gm9922	14:101729379-101729814	OK	0.439716	0.292767	-0.586819	-0.436514	0.3759	0.999642	no	0.707191	0.222426	0.389531	0.313492	0.207458	0.336626
ENSMUSG00000102166	Gm36947	1:13846870-13849119	OK	0.268523	0.178822	-0.586516	-1.03833	0.05155	0.460992	no	0.218007	0.277879	0.309683	0.13055	0.212056	0.242135
ENSMUSG00000056606	Gm1000	12:104474487-104477489	OK	0.286398	0.190741	-0.586409	-1.1668	0.03245	0.340087	no	0.301957	0.341634	0.215603	0.130137	0.232524	0.270164
ENSMUSG00000110234	Timm10b	7:105634202-105721799	OK	5.25643	3.50322	-0.5854	-0.419276	0.48995	0.999642	no	5.36674	5.61972	4.78283	3.86623	4.53312	1.74731
ENSMUSG00000029373	Pf4	5:90772434-90773383	OK	24.4244	16.2821	-0.585035	-1.78888	0.0014	0.03574	yes	17.2193	30.3392	25.7148	14.4342	18.494	17.7661
ENSMUSG00000029026	Trp73	4:154056252-154140208	OK	0.736457	0.491454	-0.583544	-0.91063	0.05375	0.474115	no	0.883501	0.617025	0.708845	0.328705	0.63275	0.675658
ENSMUSG00000045259	Klhdc9	1:171345669-171360798	OK	0.339536	0.226761	-0.582392	-0.257212	0.7289	0.999642	no	0.207883	0.476753	0.333972	0.215023	0.284589	0.192409
ENSMUSG00000001506	Col1a1	11:94936223-94953042	OK	5.78994	3.86928	-0.581485	-1.88729	0.0003	0.00993006	yes	5.8641	5.67287	5.83286	3.23975	4.21775	4.77986
ENSMUSG00000107008	Gm2762	13:53393656-53455630	OK	1.93314	1.29296	-0.580273	-0.704151	0.16265	0.805786	no	1.70546	1.92497	2.169	1.19471	1.54588	1.23653
ENSMUSG00000000094	Tbx4	11:85886421-85916097	OK	0.72215	0.48306	-0.580097	-1.52273	0.0044	0.0851991	no	0.707302	0.776541	0.682607	0.458174	0.489796	0.526096
ENSMUSG00000068601	Gm10244	6:39397803-39421294	OK	0.700745	0.468753	-0.580061	-0.244476	0.6921	0.999642	no	0.77181	0.659158	0.671268	0.503227	0.41133	0.457229
ENSMUSG00000029431	B3gnt4	5:123508394-123525488	OK	1.29709	0.867744	-0.579943	-0.399986	0.43655	0.999642	no	1.32757	1.22842	1.3353	0.696524	1.24453	0.8334
ENSMUSG00000098302	Gm28039	5:106500893-106697287	OK	0.344663	0.230636	-0.579573	-0.0452849	0.7984	0.999642	no	0	0.022933	1.01106	0	0.922543	0
ENSMUSG00000039257	Vstm2b	7:40818475-40930594	OK	6.28158	4.20507	-0.578997	-1.72828	0.00105	0.028953	yes	6.3805	6.56284	5.90139	3.84361	4.24604	4.88702
ENSMUSG00000074553	Eif1-ps1	14:40006219-40006555	OK	2.98498	1.99953	-0.578057	-0.895479	0.1036	0.666081	no	3.83507	1.53517	3.5847	1.62278	1.0739	3.67867
ENSMUSG00000024737	Slc15a3	19:10839726-10869940	OK	0.504606	0.338031	-0.578001	-0.128988	0.5961	0.999642	no	0.30586	0.643895	0.564062	0.342083	0.299052	0.368907
ENSMUSG00000065191	Gm23458	5:123332725-123374992	OK	7.36319	4.9328	-0.577923	-0.0961012	0.73365	0.999642	no	10.1335	6.37438	5.58168	2.99473	8.91815	4.82359
ENSMUSG00000026676	Ccdc3	2:5137748-5230878	OK	0.633029	0.42432	-0.57712	-1.40262	0.01025	0.159566	no	0.685173	0.565689	0.648225	0.413412	0.341977	0.528476
ENSMUSG00000077709	Snora64	17:24718115-24721929	OK	33.7744	22.6439	-0.57681	-0.0977068	0.7744	0.999642	no	0	53.0977	48.2256	6.95891	22.1582	54.4995
ENSMUSG00000074071	Fam169b	7:68266338-68363092	OK	0.534879	0.358972	-0.57534	-0.651242	0.114	0.688712	no	0.456172	0.559261	0.589203	0.286442	0.498181	0.364823
ENSMUSG00000106067	Gm7902	5:133841572-133842519	OK	0.283234	0.190128	-0.575025	-0.637953	0.2449	0.931559	no	0.126169	0.520836	0.202696	0.163129	0.259087	0.175166
ENSMUSG00000019866	Aim1	10:43950306-44148853	OK	0.561387	0.376858	-0.574974	-1.81953	0.00115	0.0310368	yes	0.503452	0.480078	0.700632	0.313277	0.421435	0.459445
ENSMUSG00000081431	Gm15483	7:133686242-133881532	OK	0.72015	0.48362	-0.574423	-0.106066	0.71615	0.999642	no	0.833955	0.611989	0.714506	0.57503	0.475668	0.308752
ENSMUSG00000084835	Gm12352	11:98412469-98439046	OK	0.976975	0.656342	-0.573873	-0.25749	0.73795	0.999642	no	0.758231	0.927418	1.24528	0.43571	0.865014	0.888935
ENSMUSG00000091105	Mrto4-ps2	12:21776158-21776707	OK	6.24046	4.19469	-0.57309	-1.51276	0.0062	0.110232	no	4.06687	7.68534	6.96918	3.0147	4.80198	5.94736
ENSMUSG00000022257	Laptm4b	15:34238025-34284295	OK	43.8482	29.4752	-0.573018	-3.341	5e-05	0.002075	yes	47.9198	48.0221	35.6028	29.4413	29.4667	29.5514
ENSMUSG00000105742	Gm42748	5:122158277-122175273	OK	0.304276	0.204552	-0.572911	-0.171685	0.7767	0.999642	no	0.219608	0.410973	0.282247	0.204436	0.214207	0.195131
ENSMUSG00000095600	Gm9457	8:4812816-4813434	OK	0.648196	0.435856	-0.572579	-0.476635	0.4525	0.999642	no	1.10666	0.304558	0.533369	0.286168	0.71016	0.460928
ENSMUSG00000059816	Fam159a	4:108367776-108383349	OK	1.91871	1.29043	-0.572292	-1.12772	0.0368	0.370174	no	1.80427	1.78756	2.16431	1.18195	1.72902	1.06878
ENSMUSG00000022676	Snai2	16:14705851-14709395	OK	17.799	11.9867	-0.570361	-2.98001	5e-05	0.002075	yes	18.0816	16.8793	18.4361	11.0914	11.9856	13.7784
ENSMUSG00000028883	Sema3a	5:13125413-13602565	OK	16.6339	11.2026	-0.570293	-3.07584	5e-05	0.002075	yes	15.6866	16.3828	17.8323	10.4059	11.4943	12.5044
ENSMUSG00000044533	Rps2	17:24718115-24721929	OK	375.734	253.12	-0.569891	-1.41626	0.00895	0.144222	no	190.531	434.741	501.929	81.2807	428.234	421.683
ENSMUSG00000046794	Ppp1r3b	8:35367749-35388139	OK	3.14098	2.11661	-0.569457	-2.3821	5e-05	0.002075	yes	2.95267	2.82199	3.64827	1.81866	2.41833	2.4108
ENSMUSG00000053441	Adamts19	18:58836763-59053678	OK	4.14668	2.79497	-0.569122	-2.63887	5e-05	0.002075	yes	4.06125	4.3491	4.02969	2.63363	2.79251	3.12012
ENSMUSG00000031937	Vstm5	9:15239044-15259393	OK	0.416321	0.280652	-0.568914	-1.11013	0.04155	0.402511	no	0.345809	0.527086	0.376069	0.302658	0.177528	0.339765
ENSMUSG00000040759	Cmtm5	14:54936469-54939256	OK	0.327253	0.220616	-0.56887	-0.67097	0.1969	0.872358	no	0.458044	0.387864	0.135852	0.364443	0.0361764	0.117401
ENSMUSG00000074284	Gm10658	9:56994967-57071966	OK	2.16365	1.45868	-0.568799	-0.396796	0.5307	0.999642	no	2.26842	2.00789	2.21463	1.21125	2.00357	1.40867
ENSMUSG00000098286	Mir8091	19:41588650-41588789	OK	4.6677	3.14714	-0.56867	-1.50137	0.33835	0.999642	no	0	6.46041	7.54269	3.03515	0	6.51826
ENSMUSG00000040794	C1qtnf4	2:90885859-90890525	OK	2.10651	1.42049	-0.568466	-1.51942	0.00575	0.103909	no	2.24568	2.35323	1.72063	0.848719	2.30573	1.6788
ENSMUSG00000095742	CAAA01147332.1	JH584295.1:65-1479	OK	131.8	88.8801	-0.568418	-2.10707	0.00015	0.00546921	yes	155.941	110.476	128.983	53.1003	117.705	131.615
ENSMUSG00000061848	Gm5805	15:81972389-81972845	OK	1.44879	0.977133	-0.568223	-0.872607	0.1037	0.666184	no	0.741246	1.93795	1.66718	0.670868	1.33187	1.23493
ENSMUSG00000025491	Ifitm1	7:140967220-140969825	OK	8.84348	5.96485	-0.568128	-1.68407	0.0019	0.0451544	yes	8.40198	7.71483	10.4136	5.39521	7.5175	5.55148
ENSMUSG00000000308	Ckmt1	2:121357713-121387168	OK	2.89346	1.95205	-0.567806	-0.987221	0.0492	0.446258	no	3.41425	2.23113	3.03499	1.39579	2.48273	2.53387
ENSMUSG00000021814	Anxa7	14:20455260-20480133	OK	11.4764	7.74556	-0.567232	-2.94935	5e-05	0.002075	yes	10.8138	11.8944	11.7211	8.04102	8.00458	6.89562
ENSMUSG00000027356	Fermt1	2:132904388-132945906	OK	4.25206	2.87035	-0.566935	-1.43961	0.00135	0.0349498	yes	4.49525	3.74213	4.5188	2.8599	2.51866	3.24295
ENSMUSG00000057315	Arhgap24	5:102474289-102897937	OK	2.16946	1.46507	-0.566366	-1.89599	0.001	0.0277131	yes	1.90452	2.09437	2.50949	1.15644	1.77827	1.76913
ENSMUSG00000028487	Bnc2	4:84275094-84675275	OK	4.7813	3.22909	-0.566276	-1.07309	0.0158	0.212688	no	3.49129	5.73031	5.12229	2.63654	3.4847	4.15857
ENSMUSG00000109383	Gm44915	7:82851598-82867074	OK	0.255175	0.172355	-0.566104	-0.51659	0.30815	0.985233	no	0.185832	0.460276	0.119418	0.144161	0.143101	0.257998
ENSMUSG00000027376	Prom2	2:127526472-127541467	OK	1.91635	1.29508	-0.565319	-1.00604	0.0128	0.185943	no	1.6043	1.71766	2.42711	1.29134	1.2846	1.31306
ENSMUSG00000071531	Gprin2	14:34194440-34201633	OK	0.407806	0.27593	-0.56358	-0.963973	0.0794	0.580031	no	0.335818	0.369675	0.517925	0.0694704	0.517197	0.447581
ENSMUSG00000025650	Col7a1	9:108953585-108984875	OK	1.38344	0.936552	-0.562825	-0.605706	0.224	0.903494	no	1.06206	1.72072	1.36753	0.844654	0.854846	1.20205
ENSMUSG00000025644	Gm7628	9:109093843-109119917	OK	0.637566	0.431813	-0.562168	-0.267752	0.69385	0.999642	no	0.70153	0.743655	0.467511	0.349376	0.480194	0.548306
ENSMUSG00000050558	Prokr2	2:132337732-132385447	OK	0.811186	0.549491	-0.561938	-0.61647	0.1441	0.762669	no	0.881282	0.694254	0.858023	0.378186	0.609809	0.831783
ENSMUSG00000106133	Gm3724	5:24100604-24160792	OK	0.443646	0.300642	-0.561363	-0.0777693	0.7886	0.999642	no	0.159647	0.351198	0.820092	0.165095	0.163839	0.708538
ENSMUSG00000104217	Gm37988	1:4807787-4897909	OK	1.97505	1.33847	-0.561302	-0.194771	0.82155	0.999642	no	2.41915	1.78245	1.72355	1.96949	0.590562	0.82435
ENSMUSG00000014198	Zfp385c	11:100574903-100704271	OK	0.760673	0.515847	-0.560333	-0.182958	0.70465	0.999642	no	0.733716	0.574088	0.974214	0.491972	0.583102	0.496341
ENSMUSG00000082436	Gm11688	2:144250122-144281227	OK	2.89385	1.96304	-0.559898	-0.0968666	0.7203	0.999642	no	2.16485	2.62142	3.89527	2.46313	2.44502	0.480889
ENSMUSG00000080859	Rpl10-ps1	2:105536079-105697364	OK	0.721696	0.489785	-0.559244	-0.249397	0.6743	0.999642	no	0.743028	0.876366	0.545694	0.494068	0.381504	0.5895
ENSMUSG00000062727	Hist1h2bk	13:22035869-22036345	OK	2.25693	1.53418	-0.556893	-1.01935	0.05945	0.499205	no	1.45993	3.87599	1.43486	1.24359	2.02802	1.62151
ENSMUSG00000105441	Gm8041	5:98075302-98075918	OK	27.8161	18.9429	-0.554261	-2.25026	5e-05	0.002075	yes	32.3739	31.5114	19.5631	14.0993	16.095	31.4781
ENSMUSG00000003227	Edar	10:58600788-58675654	OK	0.38789	0.264206	-0.553987	-1.29105	0.01915	0.242376	no	0.417049	0.368782	0.37784	0.212151	0.343966	0.288555
ENSMUSG00000110315	RP23-429G12.1	8:40712680-40713287	OK	0.339874	0.231521	-0.553858	-0.481838	0.3864	0.999642	no	0.348362	0.447398	0.223863	0.180164	0.178839	0.386917
ENSMUSG00000071516	Hist1h2ai	13:21716421-21716814	OK	0.713129	0.485782	-0.553852	-0.514008	0.36175	0.999642	no	0.985904	0.678314	0.475169	0.254942	0.885736	0.54751
ENSMUSG00000031636	Pdlim3	8:45885460-45919548	OK	3.56936	2.43362	-0.552563	-1.79033	0.001	0.0277131	yes	3.39848	3.62321	3.68639	1.43959	3.53111	3.32418
ENSMUSG00000097892	Gm26801	1:177428337-177450764	OK	0.385347	0.262877	-0.551766	-0.187752	0.7219	0.999642	no	0.334608	0.672978	0.148453	0.155192	0.343559	0.397567
ENSMUSG00000026527	Rgs7	1:175059086-175492500	OK	0.857301	0.584913	-0.551579	-0.747359	0.0999	0.655041	no	0.942678	0.977518	0.651706	0.668315	0.536043	0.46698
ENSMUSG00000067916	Zfp991	4:146153455-147492201	OK	3.86774	2.63993	-0.550991	-0.276073	0.45875	0.999642	no	4.94936	2.34444	4.30941	2.2157	2.22685	3.90146
ENSMUSG00000043289	Mei4	9:81863669-82206007	OK	0.601464	0.410548	-0.550927	-1.18739	0.0271	0.303259	no	0.550107	0.620796	0.633489	0.344493	0.387894	0.565312
ENSMUSG00000085984	1700001G11Rik	14:66295333-66311424	OK	0.682225	0.465755	-0.550676	-0.133159	0.62215	0.999642	no	0.839016	0.659816	0.547842	0.361389	0.640741	0.4995
ENSMUSG00000023800	Tiam2	17:3326572-3557713	OK	1.91682	1.30905	-0.5502	-1.43125	0.00925	0.148045	no	1.87758	1.66216	2.21073	1.16113	1.30275	1.61119
ENSMUSG00000052125	F730043M19Rik	12:33111710-33147597	OK	0.866068	0.591736	-0.549527	-0.567416	0.242	0.928507	no	0.725435	0.7376	1.13517	0.474533	0.572169	0.845709
ENSMUSG00000094153	Gm8807	18:75018771-75286966	OK	0.280165	0.191447	-0.549332	-0.139298	0.80155	0.999642	no	0.0811305	0.446551	0.312815	0.167834	0.249901	0.180219
ENSMUSG00000020059	Sycp3	10:88452744-88504073	OK	0.390216	0.266661	-0.549265	-0.289504	0.60545	0.999642	no	0.420513	0.331236	0.418899	0.20749	0.128728	0.522938
ENSMUSG00000066442	Mthfs	9:89199208-89377713	OK	4.69449	3.20884	-0.548916	-1.44603	0.0033	0.0689078	no	4.20014	4.14789	5.73544	2.87976	3.81293	3.26291
ENSMUSG00000036856	Wnt4	4:137277488-137299726	OK	4.61905	3.16167	-0.546911	-2.52478	5e-05	0.002075	yes	3.82381	4.10571	5.92763	2.83554	3.3885	3.5871
ENSMUSG00000070720	Tmem200b	4:131921770-131923140	OK	11.6355	7.96913	-0.546036	-2.35179	5e-05	0.002075	yes	11.2434	11.5134	12.1497	7.53111	9.10719	7.70709
ENSMUSG00000029272	Sult1e1	5:87575968-87591594	OK	0.882465	0.604461	-0.54589	-1.14593	0.0338	0.350015	no	0.881018	0.721164	1.04521	0.700984	0.463887	0.551989
ENSMUSG00000088769	Gm22637	14:45458791-45530118	OK	0.739692	0.506711	-0.545762	-0.0687264	0.77245	0.999642	no	0.271969	0.897911	1.0492	0.281231	0.558335	0.906046
ENSMUSG00000039376	Synpo2l	14:20658945-20668354	OK	0.327569	0.22441	-0.545658	-1.2082	0.0251	0.289105	no	0.309184	0.388449	0.285073	0.160026	0.289848	0.287741
ENSMUSG00000026459	Myog	1:134289988-134292548	OK	1.09272	0.74895	-0.54498	-1.25904	0.0203	0.250594	no	1.21726	0.799988	1.26091	0.338257	1.24981	1.06947
ENSMUSG00000097463	4930448E22Rik	9:46326390-46329413	OK	0.255253	0.175017	-0.544436	-0.822711	0.1243	0.713612	no	0.238137	0.243422	0.284201	0.123158	0.227041	0.226709
ENSMUSG00000054065	Pkp3	7:141078217-141090510	OK	3.97565	2.72743	-0.543649	-1.22962	0.01585	0.213014	no	3.85769	3.98725	4.082	2.92975	2.57525	2.47495
ENSMUSG00000088789	Scarna13	12:105031074-105031349	OK	1.78178	1.22254	-0.54344	-0.542073	0.3788	0.999642	no	1.17921	2.27168	1.89446	1.52465	1.51344	0.327431
ENSMUSG00000051727	Kctd14	7:97451322-97459557	OK	0.332585	0.228237	-0.543188	-0.902617	0.05545	0.479512	no	0.199542	0.436145	0.362067	0.230677	0.21693	0.234664
ENSMUSG00000103570	C630004M23Rik	2:9906177-10049519	OK	0.266227	0.182705	-0.543138	-0.308317	0.5634	0.999642	no	0.253947	0.279549	0.265184	0.213417	0.162961	0.141025
ENSMUSG00000020620	Abca8b	11:109932189-109995845	OK	0.320371	0.219867	-0.543112	-1.34429	0.01365	0.195879	no	0.308606	0.34128	0.311228	0.210529	0.228598	0.229814
ENSMUSG00000026678	Rgs5	1:169655500-169695813	OK	2.00329	1.3753	-0.542623	-1.15231	0.0318	0.335617	no	1.85326	1.96638	2.19025	1.48906	1.12997	1.39312
ENSMUSG00000021411	Pxdc1	13:34627839-34652681	OK	4.79747	3.29433	-0.542288	-1.66715	0.0031	0.0656445	no	4.15451	4.39612	5.84179	3.02782	3.52945	3.59224
ENSMUSG00000022103	Gfra2	14:70890129-70979838	OK	1.02627	0.705129	-0.541445	-1.63232	0.0025	0.0561803	no	1.18145	0.943699	0.953651	0.692979	0.754453	0.680106
ENSMUSG00000046341	Gm11223	4:69925629-69926079	OK	3.60108	2.47436	-0.541374	-1.1193	0.0418	0.403749	no	3.22669	4.2833	3.29325	2.84671	2.72834	1.47569
ENSMUSG00000104978	Gm31274	5:142622602-142622831	OK	0.78656	0.540854	-0.540318	-0.328177	0.3782	0.999642	no	0	1.69862	0.66106	0.532017	0.528105	0.571276
ENSMUSG00000063328	Gm9396	3:130068411-130068978	OK	0.66424	0.456873	-0.539913	-0.701401	0.19445	0.869316	no	0.644333	0.354647	0.993742	0.599818	0.198469	0.429387
ENSMUSG00000027840	Wnt2b	3:104945271-104961921	OK	0.569877	0.392042	-0.539641	-1.31253	0.0111	0.167586	no	0.482363	0.539292	0.687975	0.38979	0.286324	0.502265
ENSMUSG00000067586	S1pr3	13:51408617-51422797	OK	17.4752	12.0251	-0.539255	-3.15861	5e-05	0.002075	yes	16.5297	17.7314	18.1643	11.2943	12.7992	12.7125
ENSMUSG00000104126	Gm37486	1:178299395-178299800	OK	0.832832	0.573105	-0.539226	-0.546333	0.30965	0.986817	no	1.39165	0.510651	0.596198	0.719724	0.59536	0.257612
ENSMUSG00000097850	4631405K08Rik	1:193507237-193510174	OK	0.800181	0.550681	-0.539111	-1.30531	0.01595	0.21401	no	0.565675	1.02882	0.806049	0.457908	0.631308	0.655599
ENSMUSG00000034271	Jdp2	12:85599104-85639878	OK	3.72876	2.56675	-0.53875	-1.81561	0.00045	0.0142116	yes	3.73891	3.22044	4.22692	2.70363	2.54685	2.3129
ENSMUSG00000032985	5730522E02Rik	11:25602762-26210763	OK	2.35076	1.61821	-0.538731	-1.02343	0.05095	0.457608	no	2.61345	2.38751	2.05133	1.52785	1.63888	1.77827
ENSMUSG00000079018	Ly6c1	15:75044017-75048830	OK	0.487407	0.335631	-0.538252	-0.422366	0.2192	0.897912	no	0.655163	0.42037	0.386689	0.267513	0.621336	0.186163
ENSMUSG00000095224	F930015N05Rik	11:64435155-64522841	OK	0.716309	0.493312	-0.538081	-0.592397	0.2593	0.941288	no	0.725037	0.678415	0.745474	0.393719	0.763038	0.422773
ENSMUSG00000029638	Glcci1	6:8259287-8597548	OK	1.92364	1.32515	-0.537689	-0.877117	0.0697	0.541503	no	1.67836	1.75177	2.34079	1.23172	1.16694	1.67019
ENSMUSG00000059159	Gm8129	6:52346729-52346942	OK	0.974568	0.671517	-0.53734	-0.294214	0.4144	0.999642	no	0.651613	1.43462	0.837475	0.673995	1.33808	0
ENSMUSG00000098172	Gm26973	12:56531957-56607476	OK	0.462155	0.31855	-0.536859	-0.15587	0.7002	0.999642	no	0.710235	0.233114	0.443116	0.196856	0.355044	0.525443
ENSMUSG00000057262	Gm10020	15:52477613-52478228	OK	5.26357	3.62869	-0.536593	-1.43822	0.00875	0.142248	no	4.21312	6.45544	5.12215	2.94448	4.3258	4.3
ENSMUSG00000027849	Syt6	3:103575230-103646068	OK	1.38067	0.951938	-0.536434	-1.46709	0.00345	0.0711406	no	1.58294	1.56004	0.999047	0.777394	1.10081	1.15215
ENSMUSG00000031133	Arhgef6	X:57231484-57338729	OK	2.31356	1.59548	-0.536127	-1.16154	0.0313	0.333107	no	2.4372	1.9539	2.54958	1.16068	2.14732	1.91323
ENSMUSG00000055609	Hba-x	11:32276399-32278116	OK	2119.52	1462.42	-0.535379	-2.78256	5e-05	0.002075	yes	1864.8	2487.87	2005.89	1486.94	1511.77	1364.03
ENSMUSG00000030208	Emp1	6:135362544-135383173	OK	22.4558	15.4958	-0.535212	-3.03633	5e-05	0.002075	yes	19.775	19.9318	27.6607	13.6844	15.6125	19.0019
ENSMUSG00000097874	C030010L15Rik	16:97994600-98010000	OK	0.26587	0.183468	-0.535191	-0.295577	0.57625	0.999642	no	0.368399	0.241254	0.187955	0.215226	0.141145	0.162275
ENSMUSG00000029552	Tes	6:17065009-17171833	OK	57.8241	39.9106	-0.534898	-2.419	5e-05	0.002075	yes	54.3188	52.1242	67.0292	39.2307	41.9539	39.227
ENSMUSG00000050520	Cldn8	16:88560827-88563183	OK	1.75199	1.20947	-0.534617	-1.65903	0.0028	0.0610127	no	1.55926	1.35637	2.34035	1.28574	1.16433	1.10207
ENSMUSG00000088948	Gm23262	7:111067749-111083030	OK	42.7874	29.5444	-0.534301	-0.0387391	0.66585	0.999642	no	34.6663	55.3496	38.3464	28.957	22.1341	38.1295
ENSMUSG00000081376	Gm11694	11:115493023-115493182	OK	3.46413	2.39315	-0.53358	-0.244494	0.64255	0.999642	no	1.80045	3.96394	4.62799	1.86229	1.8486	3.99943
ENSMUSG00000002732	Fkbp7	2:76663043-76673116	OK	15.7176	10.8647	-0.532732	-2.10645	5e-05	0.002075	yes	13.8412	14.6121	18.6995	8.99525	11.8208	13.6475
ENSMUSG00000040666	Sh3bgr	16:96200469-96228933	OK	1.18299	0.817795	-0.532627	-0.487817	0.24235	0.928507	no	1.57931	1.46067	0.508986	0.658734	1.1964	0.757309
ENSMUSG00000022723	Crybg3	16:59471774-59555752	OK	3.25098	2.24815	-0.532137	-0.693745	0.1733	0.829672	no	3.04871	3.846	2.85822	2.6058	1.6657	2.1153
ENSMUSG00000023999	Kif6	17:49615135-49909847	OK	0.817054	0.565271	-0.53149	-0.909649	0.0401	0.394245	no	0.803388	0.846637	0.801138	0.541668	0.608746	0.569002
ENSMUSG00000081272	Gm13509	2:48814108-49325405	OK	0.539589	0.373449	-0.53095	-0.188915	0.81855	0.999642	no	0.531036	0.514426	0.573304	0.395479	0.348952	0.353885
ENSMUSG00000060032	H2afj	6:136808243-136810074	OK	44.4449	30.7672	-0.530623	-1.77016	0.0038	0.076356	no	47.6318	46.2272	39.4758	20.4627	41.6494	40.4942
ENSMUSG00000109695	RP23-389K5.5	19:5512527-5560575	OK	0.30752	0.212925	-0.530339	-0.377402	0.3178	0.99448	no	0.396701	0.242609	0.283252	0.227959	0.248911	0.146869
ENSMUSG00000008843	Cldn13	5:134914248-134915526	OK	1.4088	0.976153	-0.529291	-1.20772	0.0263	0.296922	no	1.1952	1.49511	1.53611	1.03957	0.920369	0.905097
ENSMUSG00000033805	Ephx4	5:107392730-107435039	OK	0.457537	0.317144	-0.528752	-0.424489	0.25555	0.939234	no	0.305392	0.58017	0.487049	0.27279	0.432242	0.290753
ENSMUSG00000087150	BC064078	6:128992951-129008040	OK	5.49245	3.80777	-0.528504	-2.17047	5e-05	0.002075	yes	4.97297	4.7099	6.79448	3.54503	3.58797	4.55304
ENSMUSG00000059776	Rpl13-ps6	3:58987169-58987805	OK	0.325303	0.225595	-0.528052	-0.491529	0.4131	0.999642	no	0.379229	0.178912	0.417769	0.224145	0.333746	0.120343
ENSMUSG00000046229	Scand1	2:156311846-156375638	OK	31.8253	22.0727	-0.527908	-2.10646	0.0004	0.0129039	yes	34.8147	39.9971	20.6641	11.3488	42.1584	23.4351
ENSMUSG00000102526	Gm37785	1:185329450-185331858	OK	0.329387	0.228521	-0.527456	-1.03859	0.05385	0.474115	no	0.372638	0.328166	0.287356	0.231263	0.262357	0.189202
ENSMUSG00000030074	Gxylt2	6:100704733-100810913	OK	2.06271	1.43224	-0.526267	-1.30955	0.01415	0.200442	no	1.97043	2.09639	2.12132	1.3298	1.56297	1.5064
ENSMUSG00000079450	Cldn34c1	X:123103494-123188795	OK	2.39468	1.66399	-0.52518	-1.22257	0.0199	0.248254	no	2.38065	1.26318	3.5402	1.41208	1.2573	2.57451
ENSMUSG00000073394	Runx2os1	17:44495986-45119290	OK	0.270009	0.187707	-0.524524	-0.210111	0.80685	0.999642	no	0.159348	0.39468	0.255999	0.0824107	0.409024	0.176984
ENSMUSG00000091269	Gm6682	12:4782214-4782511	OK	1.74626	1.21472	-0.523649	-0.590016	0.28035	0.963377	no	0.953042	1.83597	2.44976	0.739333	0.733897	2.6463
ENSMUSG00000007944	Ttc9b	7:27653914-27674598	OK	1.5051	1.04771	-0.522617	-0.503302	0.3309	0.999642	no	1.6886	1.24389	1.58281	0.512161	1.62947	1.53705
ENSMUSG00000084530	Mir1897	3:34104269-34682619	OK	1.53284	1.06718	-0.522405	-0.100862	0.81905	0.999642	no	0	2.13728	2.46123	1.33676	1.5952	0
ENSMUSG00000026315	Serpinb8	1:107590005-107610484	OK	0.837009	0.582736	-0.5224	-0.468651	0.3426	0.999642	no	1.00252	0.717393	0.791114	0.674048	0.483776	0.499073
ENSMUSG00000046667	Rbm12b1	4:12140263-12146731	OK	4.94054	3.44147	-0.521642	-0.759858	0.1404	0.755863	no	3.83044	5.94965	5.04153	3.09887	3.73939	3.82877
ENSMUSG00000029866	Kel	6:41686329-41704339	OK	3.3613	2.3415	-0.521585	-0.66704	0.20645	0.885912	no	3.1363	4.94303	2.00457	1.8973	2.76992	2.80148
ENSMUSG00000095105	Edaradd	13:12471208-12520450	OK	0.597508	0.416501	-0.520638	-1.72145	0.0019	0.0451544	yes	0.576583	0.539834	0.676107	0.359677	0.534023	0.412627
ENSMUSG00000031465	Angpt2	8:18595130-18803189	OK	1.67156	1.16519	-0.520632	-0.499049	0.34325	0.999642	no	1.60152	1.61535	1.79781	1.07656	1.35006	1.15757
ENSMUSG00000004415	Col26a1	5:136741758-136883209	OK	116.435	81.1908	-0.52014	-1.13573	0.0301	0.326008	no	110.74	117.399	121.167	73.5306	93.1346	84.5674
ENSMUSG00000054453	Sytl5	X:9885621-9994543	OK	0.269635	0.188031	-0.520032	-0.889402	0.09195	0.629398	no	0.167848	0.267071	0.373985	0.0955953	0.201651	0.359284
ENSMUSG00000028717	Tal1	4:115056425-115071755	OK	3.79771	2.64839	-0.520017	-2.04058	0.0001	0.00392328	yes	3.29541	4.02878	4.06895	2.47332	2.84026	2.80666
ENSMUSG00000032845	Alpk2	18:65265528-65393888	OK	0.25964	0.181064	-0.520009	-0.548782	0.3062	0.982964	no	0.322142	0.216274	0.240503	0.131676	0.119193	0.341713
ENSMUSG00000086247	Gm15787	5:110135841-110176504	OK	1.83946	1.28287	-0.519911	-0.266295	0.5787	0.999642	no	1.51268	1.99807	2.00763	0.839333	1.94064	1.51217
ENSMUSG00000096807	Hist1h2bm	13:21722097-21722478	OK	2.09275	1.45973	-0.519701	-0.792398	0.1388	0.751413	no	1.84027	3.76222	0.675766	1.0877	1.61956	2.04395
ENSMUSG00000024347	Psd2	18:35964829-36014715	OK	2.0763	1.44878	-0.519184	-1.18199	0.0369	0.370728	no	1.56711	2.44295	2.21885	1.2247	1.66572	1.67998
ENSMUSG00000082229	Nap1l2	X:103182970-103311782	OK	4.42462	3.0896	-0.518133	-2.07902	0.0002	0.00702851	yes	4.05802	4.38718	4.82868	2.97361	3.21815	3.19304
ENSMUSG00000082396	Zfp389	13:21504381-21505056	OK	0.683932	0.477777	-0.517516	-0.743891	0.1571	0.793038	no	0.546734	0.930141	0.574921	0.205641	0.561356	0.938469
ENSMUSG00000022148	Fyb	15:6579870-6663313	OK	0.903101	0.630969	-0.517317	-0.483916	0.2112	0.893543	no	0.588605	1.03747	1.08322	0.474587	0.819708	0.754995
ENSMUSG00000099609	Gm29008	6:124712335-124718831	OK	1.24759	0.872041	-0.516673	-0.0666918	0.73465	0.999642	no	0.709193	1.81963	1.21394	0.977014	0.485082	1.04906
ENSMUSG00000102778	Gm38165	18:61687934-61692537	OK	0.469855	0.328626	-0.51577	-0.433522	0.43575	0.999642	no	0.497088	0.273602	0.638875	0.257081	0.340255	0.460087
ENSMUSG00000022948	Setd4	16:93583456-93604063	OK	5.94814	4.16028	-0.515757	-1.03594	0.05415	0.474732	no	5.00009	5.98584	6.85849	3.17877	5.83667	4.44693
ENSMUSG00000109255	Gm7407	8:4039853-4040421	OK	5.45539	3.81592	-0.515651	-1.33554	0.0128	0.185943	no	2.82731	6.93206	6.60681	3.65552	2.24316	5.70949
ENSMUSG00000107035	Ybx1-ps2	6:37686238-37687195	OK	0.358982	0.251104	-0.515626	-0.702602	0.19395	0.86862	no	0.59136	0.205573	0.280013	0.225353	0.415435	0.138276
ENSMUSG00000060969	Irx1	13:71957920-71963723	OK	2.5051	1.75252	-0.515438	-1.75855	0.0014	0.03574	yes	2.94263	2.50094	2.07174	1.2421	2.25489	2.271
ENSMUSG00000012017	Scarf2	16:17797281-17808287	OK	17.3668	12.1503	-0.515336	-2.89827	5e-05	0.002075	yes	18.5608	17.9219	15.6177	9.84991	15.6658	13.2357
ENSMUSG00000097900	Gm8652	6:6248658-6378675	OK	0.254961	0.178379	-0.515326	-0.605872	0.2628	0.945833	no	0.215866	0.271577	0.277439	0.0956919	0.316628	0.205507
ENSMUSG00000097304	Rpl31-ps15	3:37734729-37735104	OK	1.24413	0.870522	-0.515179	-0.61211	0.2369	0.923066	no	1.0877	1.94571	0.698972	0.421896	0.977187	1.66111
ENSMUSG00000009614	Sardh	2:27188392-27248337	OK	1.45774	1.02019	-0.514889	-0.654238	0.16985	0.822219	no	0.988616	2.01626	1.36834	0.860006	1.53706	0.823701
ENSMUSG00000052241	A930035D04Rik	6:47453397-47526139	OK	2.08376	1.45875	-0.51446	-0.157759	0.8182	0.999642	no	3.01721	2.2646	0.969478	1.13494	2.04184	1.52327
ENSMUSG00000069272	Hist1h2ae	13:23570661-23571121	OK	3.61708	2.53274	-0.514126	-1.04665	0.05485	0.477254	no	4.10472	3.81567	2.93085	0.94349	4.49546	3.74852
ENSMUSG00000074579	Lekr1	3:65666227-65872281	OK	4.03122	2.82316	-0.513908	-1.12258	0.0343	0.35276	no	2.96898	4.41481	4.70988	2.39359	2.90588	3.59957
ENSMUSG00000032291	Crabp1	9:54764747-54773110	OK	1122.04	786.128	-0.513282	-2.99321	5e-05	0.002075	yes	1159.86	1027.51	1178.74	789.248	800.016	766
ENSMUSG00000047259	Mc4r	18:66857714-66860472	OK	1.21942	0.854383	-0.513242	-1.5246	0.00525	0.0974317	no	1.21289	1.19357	1.2518	0.779343	0.981168	0.877676
ENSMUSG00000107853	Gm18584	6:47432125-47433089	OK	0.337196	0.236378	-0.512492	-0.674456	0.20205	0.879601	no	0.462571	0.271577	0.277439	0.0956919	0.411616	0.342511
ENSMUSG00000052374	Actn2	13:12269425-12340760	OK	0.343219	0.240605	-0.512462	-1.02775	0.04305	0.409599	no	0.311066	0.342757	0.375833	0.214499	0.283898	0.249523
ENSMUSG00000024366	Gfra3	18:34689902-34720387	OK	0.453369	0.317907	-0.512081	-1.03772	0.0567	0.486501	no	0.577366	0.361123	0.421619	0.312171	0.28293	0.364356
ENSMUSG00000033981	Gria2	3:80681449-80802835	OK	0.742148	0.520458	-0.511925	-1.34673	0.0098	0.154012	no	0.626213	0.863726	0.736506	0.41312	0.564134	0.691458
ENSMUSG00000030653	Pde2a	7:101348066-101512827	OK	0.332566	0.233235	-0.511852	-0.14828	0.79805	0.999642	no	0.980259	0.00104513	0.0163925	0.00237864	0.00387098	0.924313
ENSMUSG00000030054	Gp9	6:87778071-87779768	OK	1.11985	0.785387	-0.511829	-1.00953	0.06385	0.518491	no	1.07294	1.48591	0.800695	0.823393	0.995022	0.499739
ENSMUSG00000024619	Cdx1	18:61018861-61036199	OK	0.372855	0.261609	-0.5112	-0.936959	0.08245	0.592817	no	0.394526	0.451006	0.273032	0.282515	0.296018	0.185389
ENSMUSG00000047953	Gp5	16:30307685-30310779	OK	0.329283	0.231076	-0.510961	-0.965407	0.0766	0.56761	no	0.235582	0.479767	0.2725	0.23149	0.278164	0.183159
ENSMUSG00000084260	Gm12844	4:117728717-117729299	OK	0.32862	0.230655	-0.510681	-0.436038	0.44185	0.999642	no	0.247544	0.340626	0.397689	0.128023	0.254164	0.412411
ENSMUSG00000087484	2900089D17Rik	5:144241689-144446757	OK	0.802404	0.563224	-0.510621	-0.170902	0.72675	0.999642	no	1.17558	0.822177	0.40946	0.438582	0.54676	0.828971
ENSMUSG00000069300	Hist1h2bj	13:22043213-22043676	OK	1.00209	0.703428	-0.510535	-0.671654	0.20965	0.89219	no	0.540991	1.88586	0.579416	0.932621	0.648035	0.300433
ENSMUSG00000080727	C920021L13Rik	3:95871521-95892005	OK	1.13839	0.799135	-0.510483	-0.295273	0.58035	0.999642	no	1.09032	1.30491	1.01993	0.86267	0.745062	0.726138
ENSMUSG00000109714	RP24-348E18.1	8:35724174-35757517	OK	0.39337	0.276337	-0.50946	-0.706121	0.14685	0.769798	no	0.291498	0.397196	0.491416	0.171325	0.372411	0.390287
ENSMUSG00000002799	Jag2	12:112908589-112929495	OK	6.90286	4.85011	-0.509177	-2.56776	5e-05	0.002075	yes	7.39521	6.68445	6.62891	4.36378	5.78394	4.88894
ENSMUSG00000107261	Trmt112-ps1	5:91737704-91738079	OK	0.455806	0.320319	-0.508911	-0.326542	0.43125	0.999642	no	0.543848	0.29934	0.524229	0.140632	0.697991	0.30202
ENSMUSG00000018500	Adora2b	11:62248983-62266453	OK	3.0934	2.17493	-0.508226	-1.71752	0.0013	0.0339748	yes	3.01654	2.64394	3.61972	1.98152	2.46603	2.27065
ENSMUSG00000038037	Socs1	16:10783807-10785536	OK	2.83488	1.99411	-0.507544	-1.47164	0.0066	0.114992	no	2.8156	2.3373	3.35175	1.5039	2.55915	2.4095
ENSMUSG00000052572	Dlg2	7:91090705-92449247	OK	1.76035	1.23925	-0.506399	-0.499455	0.34365	0.999642	no	0.710795	2.2797	2.29056	1.02081	2.05375	0.861617
ENSMUSG00000101849	Gm28386	1:77515279-77517128	OK	0.321062	0.226037	-0.506293	-0.902651	0.0963	0.643181	no	0.285233	0.32969	0.348262	0.19177	0.219646	0.300962
ENSMUSG00000039543	Cfap70	14:20394189-20452226	OK	0.519742	0.365961	-0.506108	-0.414231	0.35925	0.999642	no	0.574686	0.510902	0.473639	0.391192	0.464014	0.217445
ENSMUSG00000044330	Gm9790	3:85915782-85916070	OK	0.292344	0.205875	-0.505901	-0.216445	0.5844	0.999642	no	0.259013	0.285127	0.332893	0.26791	0	0.28768
ENSMUSG00000082423	Gm15148	X:151493113-151493269	OK	2.17643	1.53269	-0.505901	-0.250151	0.5844	0.999642	no	1.92829	2.1227	2.4783	1.99452	0	2.1417
ENSMUSG00000109898	RP24-371E20.2	7:135850707-135855710	OK	0.340669	0.240047	-0.505057	-0.779784	0.14715	0.770357	no	0.189799	0.37144	0.460769	0.174505	0.259833	0.351343
ENSMUSG00000045871	Slitrk6	14:110748577-110755149	OK	10.1876	7.17978	-0.504808	-2.73174	5e-05	0.002075	yes	10.1377	9.0545	11.3707	5.56762	7.85433	9.72954
ENSMUSG00000021458	2010111I01Rik	13:63014933-63497278	OK	10.7599	7.58797	-0.503878	-2.07032	0.0004	0.0129039	yes	9.68155	11.3749	11.2233	6.51324	8.99585	8.32956
ENSMUSG00000025255	Zfhx4	3:5177585-5415857	OK	8.06853	5.69046	-0.50376	-1.21258	0.00455	0.087285	no	5.97337	8.80378	9.42843	5.53118	5.43323	6.26627
ENSMUSG00000058542	Gm15590	17:6106436-6251128	OK	1.07588	0.759266	-0.502838	-0.146693	0.8161	0.999642	no	1.00799	1.70145	0.518201	0.55606	1.10394	0.821003
ENSMUSG00000045007	Tubg2	11:101155906-101161787	OK	2.60752	1.84023	-0.502792	-1.60046	0.00345	0.0711406	no	2.60321	2.86567	2.35369	1.76899	2.17556	1.64738
ENSMUSG00000052854	Nrk	X:138914429-139010532	OK	1.83261	1.29412	-0.501926	-2.13731	5e-05	0.002075	yes	1.7062	1.92205	1.86959	1.01934	1.44021	1.69759
ENSMUSG00000019779	Frk	10:34483399-34611226	OK	2.55239	1.80281	-0.501607	-2.07873	0.0001	0.00392328	yes	2.41908	2.44451	2.79359	1.57534	1.8812	2.17935
ENSMUSG00000022231	Sema5a	15:32244812-32696341	OK	5.70198	4.02773	-0.501497	-2.86837	5e-05	0.002075	yes	4.97002	5.48084	6.65509	3.71186	3.84823	4.83898
ENSMUSG00000099875	Gm15453	1:150265534-150265999	OK	2.38196	1.68309	-0.501039	-0.936667	0.0847	0.601199	no	2.41591	1.96998	2.76	1.48082	1.28619	2.48453
ENSMUSG00000031196	F8	X:75172714-75396459	OK	0.559049	0.395175	-0.500483	-0.254925	0.41965	0.999642	no	0.375253	0.379736	0.922157	0.380359	0.503771	0.316211
ENSMUSG00000029074	Ttll10	4:156034839-156059802	OK	0.537391	0.379943	-0.50019	-0.33421	0.3746	0.999642	no	0.283522	0.629226	0.699426	0.233869	0.809577	0.242455
ENSMUSG00000038349	Plcl1	1:55405920-55754285	OK	0.699878	0.494845	-0.500129	-0.538583	0.22315	0.902452	no	0.515457	0.894965	0.689213	0.346556	0.533023	0.753244
ENSMUSG00000022479	Vdr	15:97854424-97910630	OK	0.368757	0.260895	-0.499202	-0.329112	0.33215	0.999642	no	0.494024	0.235691	0.376555	0.145764	0.51425	0.237801
ENSMUSG00000038807	Rap1gap2	11:74383355-74610915	OK	1.66227	1.17627	-0.498931	-1.13447	0.03025	0.326775	no	1.89212	1.62643	1.46825	1.18522	1.20418	1.13047
ENSMUSG00000032578	Cish	9:107292434-107302784	OK	3.99685	2.82867	-0.498741	-0.711923	0.17355	0.829672	no	4.63798	3.16465	4.18793	3.07603	2.79242	2.37019
ENSMUSG00000027716	Trpc3	3:36620481-36690167	OK	5.23538	3.70553	-0.498614	-0.494047	0.365	0.999642	no	8.34369	4.12042	3.24203	3.27356	5.11486	3.16014
ENSMUSG00000097183	Gm17501	3:145650311-145677580	OK	3.96167	2.80416	-0.498538	-1.31903	0.015	0.206291	no	2.76164	4.72334	4.40002	2.26156	3.38489	3.30865
ENSMUSG00000072647	Adam1a	5:121397935-121545905	OK	0.763578	0.540597	-0.49822	-0.262236	0.6106	0.999642	no	0.758543	0.738191	0.794	0.557966	0.525678	0.52078
ENSMUSG00000081984	Dnajb3	1:88055387-88220002	OK	5.0478	3.57437	-0.497966	-1.50306	0.0052	0.0968302	no	5.20305	5.42297	4.51738	3.06303	4.57497	3.59645
ENSMUSG00000026546	Cfap45	1:172520800-172563717	OK	0.619609	0.438808	-0.497767	-0.398919	0.3093	0.986746	no	0.201057	0.965373	0.692396	0.456754	0.479178	0.362547
ENSMUSG00000001348	Acp5	9:22126730-22135746	OK	3.97074	2.81273	-0.497435	-1.63355	0.00245	0.0554338	no	3.57492	4.21504	4.12225	2.83754	3.00818	2.56768
ENSMUSG00000069540	Gm4925	10:88729540-88744094	OK	0.574728	0.40713	-0.497389	-0.0894954	0.68475	0.999642	no	0.602048	0.659064	0.463072	0.372677	0.357431	0.525736
ENSMUSG00000003477	Inmt	6:55170625-55175043	OK	2.06921	1.46606	-0.497132	-1.27507	0.02015	0.250239	no	1.79914	1.9427	2.46577	1.73345	1.10284	1.2945
ENSMUSG00000056089	Gm5468	15:25414191-25414844	OK	0.385282	0.272991	-0.497059	-0.53417	0.34995	0.999642	no	0.208523	0.34432	0.603002	0.269607	0.32115	0.231602
ENSMUSG00000081491	Gm12778	7:34175711-34176044	OK	0.798136	0.565602	-0.496848	-0.420543	0.4637	0.999642	no	0.890552	0.588202	0.915654	0.552684	0.365747	0.791292
ENSMUSG00000027674	Pex5l	3:32939313-33143247	OK	2.04428	1.44888	-0.496657	-1.48477	0.0042	0.0822911	no	2.17795	2.11788	1.83701	1.19823	1.53617	1.86288
ENSMUSG00000052154	Gm9870	5:72912586-72978829	OK	0.397795	0.282025	-0.496203	-0.267756	0.5864	0.999642	no	0.403444	0.383532	0.406408	0.236847	0.291083	0.363321
ENSMUSG00000085022	Gm5860	4:82033311-82102808	OK	0.310726	0.220418	-0.4954	-0.432886	0.4105	0.999642	no	0.199678	0.47587	0.256632	0.0966065	0.363934	0.324527
ENSMUSG00000105471	A430073D23Rik	5:109769406-109796298	OK	0.472303	0.335146	-0.494924	-0.615682	0.24115	0.927736	no	0.457002	0.503077	0.456831	0.210088	0.469223	0.451183
ENSMUSG00000103156	Gm38293	1:180763496-180768656	OK	0.500574	0.355344	-0.494365	-0.558167	0.30255	0.980231	no	0.59083	0.455278	0.455613	0.427787	0.303315	0.262488
ENSMUSG00000108401	Rpl19-ps10	7:115172055-115172385	OK	1.76904	1.25665	-0.493386	-0.628044	0.2297	0.912865	no	1.82052	1.1468	2.33979	0.941526	1.12152	2.02201
ENSMUSG00000097839	Gm26909	8:22628125-22653435	OK	0.692625	0.492112	-0.493087	-0.215186	0.7161	0.999642	no	0.940514	0.426315	0.711047	0.629471	0.340823	0.368685
ENSMUSG00000092281	Hmgb1-ps7	7:42011791-42058981	OK	8.00272	5.68623	-0.493018	-1.33425	0.01455	0.203836	no	9.33073	7.42794	7.2495	4.74382	4.70894	8.54836
ENSMUSG00000057173	Rfx8	1:39665300-39720997	OK	0.37324	0.265297	-0.492495	-0.694417	0.15305	0.78361	no	0.39017	0.314972	0.414578	0.269048	0.26707	0.256023
ENSMUSG00000083468	Gm9431	X:9009026-9010077	OK	0.30804	0.218978	-0.492334	-0.677107	0.2018	0.87899	no	0.304434	0.335127	0.284559	0.171758	0.255744	0.27665
ENSMUSG00000027525	Phactr3	2:178118974-178338492	OK	2.90492	2.06521	-0.492208	-1.28297	0.02025	0.250594	no	2.94264	3.12619	2.64594	1.48017	2.96486	2.33566
ENSMUSG00000089996	Tmsb15b2	X:136954987-136976874	OK	31.1196	22.1247	-0.492167	-1.43254	0.00795	0.131838	no	26.9714	30.0505	36.3368	18.6423	22.9727	28.2413
ENSMUSG00000036832	Lpar3	3:146220962-146286186	OK	0.29391	0.208962	-0.492139	-0.941847	0.086	0.605999	no	0.269962	0.25146	0.360309	0.247015	0.191895	0.14992
ENSMUSG00000032334	Loxl1	9:58287722-58313212	OK	3.65761	2.60115	-0.491751	-2.02537	0.0002	0.00702851	yes	3.74442	3.61906	3.60934	1.89779	3.70616	2.90287
ENSMUSG00000083087	Gm11249	4:67930880-67931739	OK	1.95727	1.3921	-0.49158	-1.13636	0.0395	0.390204	no	1.86009	1.57509	2.43662	1.10999	1.32219	2.02622
ENSMUSG00000051246	Msantd1	5:34761739-34923839	OK	0.468492	0.333243	-0.491452	-0.192727	0.6911	0.999642	no	0.786685	0.451576	0.167216	0.250788	0.33715	0.494246
ENSMUSG00000043832	Clec4a3	6:122952514-122969875	OK	0.435784	0.309987	-0.491408	-0.340264	0.46015	0.999642	no	0.53561	0.36028	0.411463	0.332766	0.330971	0.243444
ENSMUSG00000028644	Ermap	4:119175456-119190011	OK	3.33646	2.37379	-0.491124	-1.05067	0.04285	0.409343	no	3.11572	4.0825	2.81117	2.16592	2.83703	2.3263
ENSMUSG00000034161	Scx	15:76380260-76477269	OK	7.5445	5.36831	-0.490957	-0.576392	0.25485	0.938516	no	7.6976	7.53216	7.40375	3.77292	7.69684	6.23058
ENSMUSG00000016262	Sertad4	1:192844487-192856246	OK	23.3577	16.6311	-0.490014	-2.71697	5e-05	0.002075	yes	23.8753	22.387	23.8108	15.5332	17.2856	18.1723
ENSMUSG00000081944	Gm12276	11:62281472-62514417	OK	1.12718	0.802773	-0.489655	-0.0808064	0.79995	0.999642	no	1.60981	1.77173	0	0.475641	0.472144	1.78767
ENSMUSG00000102705	4632432E15Rik	3:10220994-10223433	OK	0.33676	0.23985	-0.489589	-0.966389	0.07605	0.565819	no	0.241482	0.485426	0.283373	0.206337	0.30184	0.244886
ENSMUSG00000083011	Gm12816	4:112804615-113286973	OK	0.265677	0.189223	-0.489587	-0.65389	0.224	0.903494	no	0.139569	0.358495	0.298966	0.192485	0.191069	0.180853
ENSMUSG00000038668	Lpar1	4:58435254-58553898	OK	83.6816	59.602	-0.48955	-1.1647	0.02965	0.32219	no	77.8666	81.2237	91.9544	57.3036	64.3519	59.4488
ENSMUSG00000090063	Dlx6os1	6:6820188-6871633	OK	18.4407	13.137	-0.489255	-1.08725	0.0431	0.409599	no	16.7227	18.8812	19.7182	10.1112	15.5278	16.7979
ENSMUSG00000051397	Tacstd2	6:67532488-67556216	OK	4.61952	3.29192	-0.488815	-1.79234	0.00095	0.0265952	yes	4.09114	4.3518	5.41562	2.63092	3.63418	4.27164
ENSMUSG00000061104	Sap18b	8:95825345-95826134	OK	0.664019	0.47327	-0.488561	-0.794301	0.14025	0.755571	no	0.720735	0.705244	0.56608	0.414161	0.575563	0.489196
ENSMUSG00000021675	F2rl2	13:95627176-95891922	OK	0.318893	0.227325	-0.488316	-0.278577	0.6421	0.999642	no	0.306347	0.348474	0.301858	0.13731	0.283086	0.351594
ENSMUSG00000032332	Col12a1	9:79598990-79718831	OK	2.10243	1.49908	-0.487982	-0.784939	0.10225	0.662623	no	2.15428	2.259	1.89402	1.67377	1.35669	1.29208
ENSMUSG00000026614	Slc30a10	1:185447115-185468762	OK	0.803576	0.573131	-0.48757	-1.36915	0.0116	0.172145	no	0.654392	1.02779	0.72855	0.534597	0.552065	0.671265
ENSMUSG00000046743	Fat4	3:38874569-39011985	OK	3.27454	2.33627	-0.487081	-2.67	5e-05	0.002075	yes	2.46273	3.46304	3.89784	2.14074	2.32078	2.74285
ENSMUSG00000069265	Hist1h3a	13:23761852-23762386	OK	1.19295	0.85127	-0.486845	-0.761031	0.1548	0.788173	no	0.354245	1.9498	1.27481	1.17252	0.509206	0.550832
ENSMUSG00000064080	Fbln2	6:91212454-91272540	OK	20.112	14.3554	-0.48646	-1.87886	0.0003	0.00993006	yes	21.4666	22.3451	16.5242	12.3947	17.1316	15.5007
ENSMUSG00000048015	Neurod4	10:130268152-130280240	OK	0.9734	0.694913	-0.4862	-1.41928	0.0089	0.143978	no	1.57713	0.641794	0.701277	0.618502	0.729071	0.813576
ENSMUSG00000073652	Apol7d	1:71585519-71662843	OK	2.15034	1.53523	-0.486108	-0.219909	0.63285	0.999642	no	2.27155	2.33529	1.84418	1.38047	1.59222	1.78776
ENSMUSG00000069083	Gm10259	3:25211015-25212605	OK	0.27814	0.198583	-0.48607	-0.766432	0.14695	0.769798	no	0.287708	0.242194	0.304518	0.26258	0.156389	0.112782
ENSMUSG00000025735	Rhbdl1	17:25794570-25985796	OK	0.908777	0.648901	-0.485927	-0.0826931	0.65345	0.999642	no	0.694805	1.44683	0.584696	0.468212	1.13699	0.522192
ENSMUSG00000032470	Mras	9:99385419-99437381	OK	14.2057	10.145	-0.485697	-1.34786	0.0121	0.178125	no	13.1877	14.2893	15.14	8.96093	11.9987	10.6594
ENSMUSG00000045629	Sh3tc2	18:61953074-62015715	OK	2.46444	1.76019	-0.485527	-1.98547	0.00035	0.0114701	yes	2.29745	2.46346	2.63241	1.73183	1.886	1.69112
ENSMUSG00000073406	H2-Bl	17:36080114-36084223	OK	0.369089	0.263665	-0.485263	-0.323473	0.2776	0.959431	no	0.598052	0.368298	0.140918	0.344834	0.207619	0.157375
ENSMUSG00000021198	Unc79	12:102948858-103184065	OK	0.365434	0.261065	-0.485203	-0.376575	0.32485	0.998299	no	0.443905	0.400579	0.251818	0.125862	0.442184	0.350352
ENSMUSG00000023926	Rhag	17:40811125-40840754	OK	2.10834	1.50767	-0.483785	-1.57979	0.0033	0.0689078	no	1.78049	2.55284	1.99171	1.7848	1.25259	1.2085
ENSMUSG00000038296	Galnt18	7:111471660-111779977	OK	3.83919	2.74634	-0.483292	-1.89796	0.00045	0.0142116	yes	3.51087	3.83152	4.17517	2.79023	2.69321	2.71168
ENSMUSG00000026828	Galnt5	2:57997883-58052864	OK	0.472496	0.338048	-0.483071	-0.842895	0.1058	0.670053	no	0.391115	0.546216	0.480156	0.277748	0.354824	0.441874
ENSMUSG00000040016	Ptger3	3:157566891-157645888	OK	0.446953	0.319807	-0.482924	-1.00141	0.0644	0.520294	no	0.307711	0.422206	0.610942	0.263697	0.417611	0.334222
ENSMUSG00000091623	Gm17092	5:99955934-99978938	OK	1.83242	1.31139	-0.482645	-0.0982388	0.77295	0.999642	no	2.32239	2.13914	1.03573	0.588283	2.38449	1.68452
ENSMUSG00000029055	Plch2	4:154983114-155056784	OK	1.60831	1.15138	-0.482189	-0.820337	0.1196	0.701841	no	1.32634	2.08703	1.41157	0.949058	1.13523	1.57216
ENSMUSG00000071369	Map3k5	10:19934471-20142753	OK	1.76832	1.26594	-0.48217	-0.659075	0.16575	0.813096	no	2.27832	1.42974	1.59689	1.23414	1.42404	1.17144
ENSMUSG00000085338	2410004I01Rik	11:102838472-103101658	OK	0.627391	0.449201	-0.482004	-0.0769435	0.73465	0.999642	no	0.477047	0.945283	0.459844	0.493528	0.465343	0.344406
ENSMUSG00000073889	Il11ra1	4:41699988-41774247	OK	43.2264	30.9574	-0.481628	-0.639341	0.21385	0.894775	no	39.1016	36.6777	53.8998	22.9888	31.5541	46.2978
ENSMUSG00000020354	Sgcd	11:46896252-47988969	OK	2.00205	1.4341	-0.481335	-1.21718	0.02435	0.283631	no	1.6933	2.0288	2.28406	1.31482	1.54915	1.55761
ENSMUSG00000093716	Gm19815	17:90033630-91093071	OK	0.256683	0.183947	-0.480696	-0.18084	0.66795	0.999642	no	0.351136	0.193269	0.225646	0	0.54079	0.194999
ENSMUSG00000079942	Rpl28-ps3	4:126058564-126092195	OK	5.10136	3.65587	-0.480667	-0.487029	0.36885	0.999642	no	4.5598	4.88386	5.86041	3.82413	3.41641	3.55881
ENSMUSG00000041669	Prima1	12:103196907-103242150	OK	0.328803	0.235765	-0.479875	-0.29483	0.34345	0.999642	no	0.199437	0.402492	0.38448	0.137547	0.409535	0.258431
ENSMUSG00000044320	1700001O22Rik	2:30794768-30803661	OK	3.72029	2.66775	-0.479792	-1.25618	0.01535	0.209016	no	3.62397	4.15377	3.38313	2.58357	2.71609	2.78776
ENSMUSG00000079965	Gm14853	X:105797614-105929403	OK	0.713492	0.511814	-0.479278	-0.0931024	0.7649	0.999642	no	0.610178	0.746264	0.784033	0.771468	0.27847	0.225849
ENSMUSG00000029754	Dlx6	6:6820188-6871633	OK	32.203	23.1213	-0.477973	-1.14253	0.03045	0.328077	no	34.9153	32.2729	29.4208	20.1703	27.82	24.3246
ENSMUSG00000049107	Ntf3	6:126101411-126166910	OK	9.50471	6.82528	-0.477755	-1.96352	0.0004	0.0129039	yes	9.80829	9.14644	9.55941	5.74625	7.35541	8.45319
ENSMUSG00000092454	Gm2991	15:65922442-65976804	OK	0.278548	0.20005	-0.477563	-0.31896	0.4963	0.999642	no	0.33856	0.27952	0.217564	0.262641	0.0869035	0.188015
ENSMUSG00000078528	Gm17068	19:16132830-16387463	OK	0.255053	0.18321	-0.4773	-0.12752	0.8044	0.999642	no	0.271831	0.299236	0.194092	0.124963	0.248089	0.234823
ENSMUSG00000031162	Gata1	X:7959259-7978071	OK	2.18917	1.57268	-0.477161	-1.34061	0.00785	0.131404	no	1.83765	2.72322	2.00665	1.52919	1.75911	1.47322
ENSMUSG00000054046	Klk13	7:43690417-43803826	OK	0.317368	0.227994	-0.477161	-0.314034	0.5323	0.999642	no	0.363678	0.306657	0.281771	0.251029	0.296277	0.113642
ENSMUSG00000078903	Gm14391	2:175191064-175206917	OK	0.751497	0.540137	-0.476441	-0.559104	0.2053	0.884824	no	0.559913	0.672992	1.02158	0.492055	0.599067	0.577372
ENSMUSG00000092564	BC051226	17:33908181-33909317	OK	7.19223	5.16949	-0.476417	-1.18598	0.02815	0.311422	no	6.88513	6.63898	8.05258	5.70108	5.67038	3.60543
ENSMUSG00000109587	RP24-335D17.3	8:80764437-80881169	OK	0.555385	0.399211	-0.476336	-0.198423	0.76405	0.999642	no	0.678606	0.42687	0.560679	0.350983	0.248841	0.646039
ENSMUSG00000043336	Filip1l	16:57302198-57606825	OK	5.80367	4.1733	-0.475776	-1.60866	0.00255	0.0570709	no	6.03231	5.48951	5.88918	4.12687	3.92265	4.5168
ENSMUSG00000002020	Ltbp2	12:84783211-84878132	OK	0.328971	0.236581	-0.475631	-0.394562	0.40315	0.999642	no	0.292954	0.333081	0.360879	0.294265	0.203567	0.154225
ENSMUSG00000018126	Baiap2l2	15:79258194-79285537	OK	3.06961	2.20804	-0.475286	-0.446608	0.39115	0.999642	no	4.58331	2.40614	2.21938	1.10731	3.38797	3.22958
ENSMUSG00000105366	Gm43719	5:13604034-13606233	OK	1.51135	1.08754	-0.47477	-1.40139	0.0112	0.168941	no	1.29375	1.41124	1.82905	0.936734	1.18344	1.29325
ENSMUSG00000105641	Gm5853	3:98382460-98763127	OK	0.860986	0.619628	-0.474587	-0.256672	0.63435	0.999642	no	0.656162	1.08347	0.843321	0.622224	0.505282	0.728783
ENSMUSG00000085457	1110046J04Rik	13:33917917-34037147	OK	0.686236	0.49412	-0.473844	-0.184825	0.78985	0.999642	no	0.610607	0.715247	0.732854	0.460564	0.424576	0.630775
ENSMUSG00000108815	RP23-325D10.3	7:127776669-127803802	OK	1.19176	0.858333	-0.47348	-0.375943	0.4272	0.999642	no	0.993801	1.82335	0.758125	0.440832	1.27351	1.27816
ENSMUSG00000091655	Gm8741	17:35335908-35336292	OK	0.476564	0.343233	-0.473479	-0.311432	0.5337	0.999642	no	0.64649	0.284667	0.498534	0.133739	0.531023	0.574432
ENSMUSG00000097868	A330069E16Rik	2:91237145-91238352	OK	0.95366	0.68687	-0.473438	-0.89925	0.09305	0.632993	no	1.09784	0.793093	0.970049	0.674231	0.598824	0.800194
ENSMUSG00000074269	Rec114	9:58582239-58743964	OK	1.40397	1.01135	-0.473227	-0.239992	0.61105	0.999642	no	1.26515	1.7001	1.24666	1.06128	0.728206	1.19466
ENSMUSG00000034923	Ly6g6f	17:35080479-35085610	OK	0.299573	0.21586	-0.472817	-0.657844	0.21415	0.894775	no	0.150129	0.33053	0.418061	0.207048	0.282598	0.166745
ENSMUSG00000033082	Clec1a	6:129424771-129452000	OK	0.615512	0.443513	-0.472809	-0.680867	0.1677	0.816601	no	0.518066	0.579264	0.749206	0.390904	0.489978	0.502269
ENSMUSG00000028862	Map3k6	4:133240817-133252929	OK	0.585665	0.422023	-0.472756	-0.59339	0.18765	0.860661	no	0.481759	0.819073	0.456164	0.479643	0.456167	0.272638
ENSMUSG00000045062	Pcdhb7	18:36930183-37841873	OK	0.632181	0.455664	-0.472368	-0.193398	0.7692	0.999642	no	0.548145	0.634755	0.713644	0.360801	0.555495	0.545558
ENSMUSG00000084797	Gm14321	2:167777466-167783486	OK	1.0115	0.72912	-0.472262	-0.466509	0.35745	0.999642	no	1.187	1.16177	0.685717	0.791814	0.747635	0.585216
ENSMUSG00000095478	Gm9824	10:29030127-29030691	OK	0.918887	0.662392	-0.472202	-0.720038	0.17855	0.841641	no	1.03949	0.715182	1.00199	0.671996	0.800467	0.50511
ENSMUSG00000016128	Stard13	5:151037509-151432118	OK	2.92652	2.10964	-0.472191	-0.517753	0.2274	0.907896	no	2.54501	2.8638	3.37075	2.0249	2.37784	2.0109
ENSMUSG00000022817	Itgb5	16:33829664-33949153	OK	54.7906	39.4996	-0.47209	-2.16011	5e-05	0.002075	yes	52.2404	53.2394	58.8922	38.2663	42.1626	39.3033
ENSMUSG00000064337	mt-Rnr1	MT:69-1024	OK	391.943	282.614	-0.471812	-2.88923	5e-05	0.002075	yes	385.843	409.078	380.907	291.671	261.298	285.813
ENSMUSG00000078716	Tmem8b	4:43659621-43692668	OK	5.80783	4.18854	-0.471551	-1.11883	0.03455	0.354449	no	5.09701	6.59502	5.73146	3.79647	5.06213	4.09911
ENSMUSG00000025795	Rassf3	10:121410349-121476250	OK	18.9172	13.6485	-0.470959	-2.709	5e-05	0.002075	yes	18.9818	17.4945	20.2754	12.3983	14.6713	15.126
ENSMUSG00000029830	Svopl	6:37983738-38046996	OK	0.944661	0.681927	-0.470181	-1.06659	0.0389	0.385199	no	0.773112	1.11197	0.9489	0.52044	0.911508	0.775317
ENSMUSG00000092569	Gm20544	18:75365331-75367088	OK	2.04669	1.47762	-0.470014	-1.00883	0.0672	0.530819	no	1.87877	2.65152	1.60977	1.2457	2.02794	1.39114
ENSMUSG00000022899	Slc15a2	16:36750177-36784962	OK	2.00702	1.44919	-0.469813	-0.745651	0.2076	0.888735	no	3.61516	0.532062	1.87385	2.21052	1.13333	0.242369
ENSMUSG00000086193	Gm11508	11:88011990-88053755	OK	0.328801	0.237529	-0.469111	-0.0204235	0.7451	0.999642	no	0.2967	0.435484	0.254219	0.204594	0.101545	0.439383
ENSMUSG00000002885	Adgre5	8:83715176-83741326	OK	5.07171	3.66429	-0.468938	-0.510147	0.20635	0.885912	no	5.6554	4.94559	4.61414	3.21012	4.19806	4.03886
ENSMUSG00000020023	Tmcc3	10:94311948-94612084	OK	1.06629	0.770481	-0.468764	-0.895357	0.03575	0.363151	no	1.01832	0.953162	1.22737	0.814015	0.72927	0.724623
ENSMUSG00000090084	Srpx	X:10037976-10216920	OK	1.42936	1.03308	-0.468422	-0.386348	0.43205	0.999642	no	1.56327	0.900748	1.82406	0.899247	1.05538	1.27843
ENSMUSG00000026638	Irf6	1:193153110-193201703	OK	6.53633	4.72424	-0.4684	-0.835008	0.07125	0.548773	no	6.62276	5.05679	7.92945	4.84501	4.66198	4.54494
ENSMUSG00000091639	Gm3756	9:31936458-31936755	OK	12.9701	9.37659	-0.468056	-1.01643	0.06255	0.513488	no	3.09739	20.1957	15.6172	2.46444	19.0813	13.4961
ENSMUSG00000109805	RP24-345M16.2	8:64999306-65037336	OK	0.456059	0.329804	-0.467614	-0.126259	0.80305	0.999642	no	1.06133	0.306851	0	0	0	1.31921
ENSMUSG00000028373	Astn2	4:65380802-66404611	OK	0.824769	0.596947	-0.466387	-0.542444	0.31195	0.987632	no	0.77698	0.784311	0.913016	0.509938	0.726454	0.641458
ENSMUSG00000036699	Zcchc12	X:36195903-36199158	OK	3.37399	2.44343	-0.46555	-1.67156	0.0024	0.0544516	no	2.83781	3.49296	3.79121	2.12719	2.90535	2.614
ENSMUSG00000026825	Dnm1	2:32308470-32381938	OK	24.7784	17.9493	-0.46515	-1.21852	0.0229	0.272703	no	27.7284	23.735	22.8717	15.5844	20.7627	19.8658
ENSMUSG00000079608	Stard6	18:70452211-70501066	OK	0.339147	0.245708	-0.464967	-0.185521	0.5903	0.999642	no	0.358654	0.378803	0.279985	0.173576	0.366301	0.26938
ENSMUSG00000074412	Gm10689	8:25454272-25454704	OK	1.33342	0.966059	-0.464953	-0.674389	0.20785	0.888933	no	1.12583	0.901333	1.97311	0.846907	1.26102	0.909403
ENSMUSG00000023259	Slc26a6	9:108853282-108913049	OK	9.77837	7.08518	-0.464789	-1.01586	0.05225	0.464986	no	9.18275	9.44781	10.7045	7.41671	6.43282	7.07449
ENSMUSG00000021215	Net1	13:3882564-3918220	OK	63.1484	45.7753	-0.464176	-2.84458	5e-05	0.002075	yes	63.6316	62.4559	63.3577	44.8148	45.3525	48.1194
ENSMUSG00000081476	Itpa-ps1	2:94300766-94438136	OK	0.815722	0.591568	-0.463534	-0.084625	0.7547	0.999642	no	0.654856	0.720879	1.07143	0.492952	0.916867	0.463501
ENSMUSG00000068522	Aard	15:52040106-52045722	OK	4.12896	2.99456	-0.463436	-1.54723	0.00455	0.087285	no	4.07943	4.19735	4.11011	2.94732	3.00985	3.07374
ENSMUSG00000054728	Phactr1	13:42680622-43138526	OK	5.11799	3.71292	-0.463022	-0.758317	0.0669	0.530734	no	5.41385	4.36845	5.57167	3.40046	4.25822	3.79254
ENSMUSG00000082382	Gm14970	X:127446561-127446916	OK	0.3317	0.240642	-0.462989	-0.241408	0.6392	0.999642	no	0.460206	0.337736	0.197157	0.317342	0.157504	0.17038
ENSMUSG00000073063	Hbq1b	11:32286964-32287784	OK	1.81792	1.31913	-0.462708	-0.895393	0.09755	0.647342	no	1.10781	2.28253	2.06343	1.35946	1.3856	1.17198
ENSMUSG00000054675	Tmem119	5:113793728-113800516	OK	32.2181	23.3793	-0.462639	-2.11777	0.0001	0.00392328	yes	31.6056	30.9566	34.0922	21.0744	25.7324	25.6361
ENSMUSG00000029859	Epha1	6:42328712-42381215	OK	4.09097	2.96877	-0.462575	-0.859428	0.09775	0.647654	no	4.08958	3.89528	4.28803	2.91696	2.91472	3.12644
ENSMUSG00000011267	Zfp296	7:19564945-19580656	OK	0.297803	0.216116	-0.462553	-0.205788	0.6903	0.999642	no	0.283024	0.292093	0.318292	0.329353	0.12715	0.0786085
ENSMUSG00000024869	Nudt8	19:4000579-4007005	OK	12.2599	8.89733	-0.462508	-1.32822	0.01285	0.186342	no	10.9681	11.8357	13.976	8.3008	9.22608	9.76164
ENSMUSG00000097045	Gm26641	1:171423184-171437318	OK	0.350776	0.254611	-0.462256	-0.649038	0.2368	0.923066	no	0.312485	0.378388	0.361454	0.193931	0.352926	0.277655
ENSMUSG00000044080	S100a1	3:90511033-90514392	OK	2.92773	2.12518	-0.462196	-1.09484	0.04355	0.412451	no	2.51293	2.45362	3.81665	1.74058	2.76575	2.25383
ENSMUSG00000029651	Mtus2	5:147957319-148316065	OK	1.27144	0.923261	-0.461649	-0.812372	0.0724	0.553369	no	1.66847	1.21949	0.926345	0.601907	1.2314	1.25782
ENSMUSG00000044499	Hs3st5	10:36506813-36834397	OK	0.4702	0.341454	-0.461582	-0.84639	0.08735	0.611339	no	0.524345	0.382054	0.5042	0.322069	0.236314	0.485365
ENSMUSG00000006219	Fblim1	4:141576061-141606096	OK	34.4398	25.0128	-0.46141	-1.44404	0.00765	0.129728	no	35.321	32.5986	35.3998	22.1144	28.054	27.7685
ENSMUSG00000033852	Gm28042	2:120027482-120043033	OK	2.71613	1.9732	-0.461012	-0.677937	0.1996	0.876412	no	2.46328	3.44149	2.24361	1.6758	2.7112	1.83
ENSMUSG00000040483	Xaf1	11:72301628-72313733	OK	0.538937	0.391563	-0.460871	-0.409115	0.41895	0.999642	no	0.754876	0.533033	0.3289	0.511554	0.268338	0.274806
ENSMUSG00000025402	Nab2	10:127642985-127701049	OK	21.9932	15.9831	-0.460514	-1.43995	0.00235	0.0536118	no	20.9436	21.4314	23.6047	14.1687	18.5685	17.0264
ENSMUSG00000031698	Mylk3	8:85324302-85386345	OK	1.30606	0.949995	-0.45923	-0.854718	0.0898	0.621377	no	0.799323	1.59875	1.5201	1.03388	0.897602	0.834623
ENSMUSG00000084860	2610204G07Rik	13:104631139-104839274	OK	0.513329	0.373392	-0.459191	-0.203943	0.7437	0.999642	no	0.5354	0.392917	0.611669	0.523021	0.183238	0.26429
ENSMUSG00000095812	Gm5473	15:63631696-63632338	OK	0.368749	0.268351	-0.458517	-0.463631	0.3982	0.999642	no	0.213743	0.411762	0.480742	0.276356	0.164594	0.356099
ENSMUSG00000078190	Dnm3os	1:161942085-162479943	OK	8.57482	6.24031	-0.458489	-1.86514	0.0007	0.0207948	yes	10.9866	8.23243	6.50538	5.95557	5.49353	7.55656
ENSMUSG00000041559	Fmod	1:134037253-134048277	OK	0.621113	0.452142	-0.458077	-0.927724	0.04665	0.430698	no	0.718518	0.575892	0.568927	0.432894	0.495821	0.446961
ENSMUSG00000084350	Znf41-ps	4:145825236-145829942	OK	1.5802	1.15039	-0.457989	-1.40013	0.0099	0.155288	no	1.47656	1.21615	2.0479	1.10975	1.02524	1.35682
ENSMUSG00000069763	Tmem100	11:90030347-90036508	OK	3.74864	2.72966	-0.457645	-1.61718	0.0031	0.0656445	no	3.99245	3.33753	3.91594	2.80998	2.68144	2.61725
ENSMUSG00000037358	4930578C19Rik	X:18414880-18461397	OK	0.277436	0.202029	-0.457592	-0.823788	0.1207	0.705201	no	0.247618	0.259109	0.32558	0.172266	0.242062	0.22152
ENSMUSG00000028017	Egf	3:129677564-129763884	OK	0.822605	0.599023	-0.457587	-0.55583	0.256	0.939634	no	1.01028	0.678499	0.779038	0.750071	0.383072	0.512879
ENSMUSG00000053716	Dusp7	9:106368631-106375724	OK	45.9701	33.4814	-0.457334	-1.40275	0.00325	0.0682087	no	47.6691	41.581	48.6601	32.5797	34.9025	33.8638
ENSMUSG00000030431	Tmem238	7:4784556-4789656	OK	1.40739	1.02532	-0.456948	-0.563943	0.1235	0.711741	no	1.68231	1.43304	1.10682	0.849334	1.15802	1.2446
ENSMUSG00000034656	Cacna1a	8:84388439-84640246	OK	7.46233	5.43655	-0.456937	-0.338915	0.53835	0.999642	no	8.4422	9.97356	3.97124	3.55994	11.3327	3.29356
ENSMUSG00000067608	Pcna-ps2	19:9283237-9284494	OK	56.0866	40.8735	-0.45649	-2.52107	5e-05	0.002075	yes	65.5595	31.7211	70.9792	34.9652	29.0835	64.4801
ENSMUSG00000047642	D930020B18Rik	10:121641587-121692892	OK	0.502674	0.366385	-0.45626	-0.806499	0.13	0.727375	no	0.376616	0.609834	0.521571	0.335997	0.43968	0.353868
ENSMUSG00000068220	Lgals1	15:78926724-78930465	OK	201.946	147.224	-0.455957	-2.73819	5e-05	0.002075	yes	165.94	187.429	252.47	141.068	152.097	154.664
ENSMUSG00000045573	Penk	4:4133530-4188703	OK	3.61514	2.636	-0.455704	-1.19252	0.0242	0.282881	no	3.18242	3.25819	4.40482	1.8665	3.104	3.707
ENSMUSG00000051716	Apon	10:128254130-128255901	OK	0.37472	0.273232	-0.455687	-0.81881	0.12815	0.722654	no	0.41473	0.346973	0.362457	0.308862	0.272526	0.202678
ENSMUSG00000051116	Gm8121	5:57570081-58133230	OK	0.372732	0.271901	-0.455057	-0.130876	0.8149	0.999642	no	0.158429	0.34886	0.610907	0.245833	0.243999	0.351939
ENSMUSG00000103037	Pcdhgb1	18:36930183-37841873	OK	0.443958	0.323896	-0.454891	-0.183217	0.881	0.999642	no	0.411146	0.379452	0.541275	0.246918	0.343847	0.457902
ENSMUSG00000109489	Gm7451	8:4641465-4642857	OK	0.257996	0.188334	-0.454055	-0.663501	0.21195	0.894286	no	0.335602	0.260779	0.177605	0.142936	0.182423	0.285041
ENSMUSG00000027316	Gfra4	2:131039631-131043088	OK	3.61788	2.64251	-0.453236	-1.35195	0.01005	0.157193	no	3.48969	3.59474	3.76922	2.37141	2.88002	2.94722
ENSMUSG00000069310	Hist1h3c	13:23745012-23745501	OK	4.18094	3.05378	-0.453232	-1.0394	0.057	0.487808	no	3.77109	4.87326	3.89846	2.88307	3.53525	2.91371
ENSMUSG00000106617	Gm36266	5:137605102-137629002	OK	0.623209	0.455556	-0.452088	-0.296648	0.58995	0.999642	no	0.637732	0.451301	0.780594	0.455476	0.405339	0.505932
ENSMUSG00000030259	Rassf8	6:145746747-145821079	OK	8.09106	5.91513	-0.451919	-1.31834	0.01175	0.173746	no	7.71173	9.19201	7.36945	5.84518	6.06959	5.90057
ENSMUSG00000032238	Rora	9:68653785-69388246	OK	1.55576	1.13739	-0.451893	-0.753851	0.1345	0.740759	no	1.74512	1.75219	1.16996	0.867526	1.44416	1.37034
ENSMUSG00000020241	Col6a2	10:76595761-76623630	OK	3.08092	2.2538	-0.451004	-1.88956	0.00085	0.024374	yes	2.80312	3.47691	2.96274	1.91768	2.55749	2.62234
ENSMUSG00000070858	Gm1673	5:33983432-33985013	OK	84.4207	61.781	-0.450432	-2.11526	5e-05	0.002075	yes	97.3815	88.4295	67.4509	43.2034	94.264	66.4533
ENSMUSG00000097131	D230017M19Rik	1:72236464-72284314	OK	0.618504	0.452663	-0.450345	-0.466908	0.3921	0.999642	no	0.636546	0.610212	0.608753	0.332063	0.62379	0.522734
ENSMUSG00000008999	Bmp7	2:172868011-172940321	OK	15.0771	11.0357	-0.450184	-2.54808	5e-05	0.002075	yes	15.697	13.5374	15.9967	10.4646	12.2023	11.0112
ENSMUSG00000062582	Rpl30-ps8	12:99047229-99047577	OK	0.983423	0.719832	-0.450152	-0.418496	0.40965	0.999642	no	1.12379	1.41381	0.412666	0.664221	0.659338	0.891546
ENSMUSG00000059022	Kcp	6:29471436-29509698	OK	8.87427	6.49571	-0.45014	-1.18655	0.02585	0.29385	no	10.4145	8.94947	7.25885	6.39901	6.39675	6.78807
ENSMUSG00000074826	Gm10767	13:66900616-66998401	OK	0.38449	0.281436	-0.450139	-0.159375	0.7267	0.999642	no	0.346076	0.350201	0.457192	0.282492	0.225811	0.334948
ENSMUSG00000028565	Nfia	4:97568132-98118874	OK	2.54671	1.8648	-0.44961	-0.606117	0.28055	0.963377	no	3.00475	2.38265	2.25273	1.07622	2.88385	2.42294
ENSMUSG00000110161	RP23-349N15.2	9:8004829-8009269	OK	0.516619	0.378395	-0.449208	-0.484834	0.3413	0.999642	no	0.480011	0.452919	0.616927	0.42557	0.281628	0.380812
ENSMUSG00000057246	BC051142	17:34398819-34460734	OK	0.99167	0.726508	-0.448881	-0.576141	0.26745	0.951086	no	1.0322	1.37073	0.572081	0.945024	0.450172	0.565812
ENSMUSG00000042106	Fam212a	9:107975504-108048782	OK	43.8037	32.092	-0.44884	-1.10115	0.0408	0.398518	no	40.325	40.9247	50.1613	29.2952	35.4769	34.3006
ENSMUSG00000032231	Anxa2	9:69453619-69491795	OK	65.485	48.0019	-0.448072	-2.38308	5e-05	0.002075	yes	55.1664	66.0422	75.2464	38.8044	56.9761	57.4228
ENSMUSG00000015812	Gnrh1	14:67745228-67749435	OK	0.395545	0.28997	-0.447936	-0.387293	0.48405	0.999642	no	0.442449	0.649409	0.0947751	0.381372	0.151427	0.245709
ENSMUSG00000096054	Syne1	10:5336948-5550692	OK	0.6797	0.49839	-0.447621	-1.34071	0.01475	0.204728	no	0.559497	0.806277	0.673325	0.431406	0.611017	0.519733
ENSMUSG00000062152	Rpl21-ps14	8:4861168-4861651	OK	0.359783	0.263829	-0.447524	-0.393968	0.54455	0.999642	no	0.418672	0.553059	0.107618	0.173221	0.429869	0.279005
ENSMUSG00000016255	Tubb1	2:174450694-174457882	OK	1.85785	1.3626	-0.447272	-1.20961	0.02485	0.287428	no	1.15119	2.64189	1.78047	1.332	1.70284	1.08356
ENSMUSG00000074415	2610203C20Rik	9:41327259-41655483	OK	20.222	14.8319	-0.447227	-2.38238	5e-05	0.002075	yes	19.1662	26.4659	15.0341	10.5242	18.7093	19.5699
ENSMUSG00000022883	Robo1	16:72663148-73046095	OK	14.3237	10.5092	-0.44675	-2.67054	5e-05	0.002075	yes	14.1067	14.4403	14.424	8.92569	10.8843	13.3012
ENSMUSG00000029075	Tnfrsf4	4:156013842-156016612	OK	1.01646	0.745915	-0.446476	-0.75073	0.15525	0.789977	no	1.03185	1.36103	0.656506	0.720715	0.672006	0.870223
ENSMUSG00000086541	Has2os	15:56665626-56778399	OK	0.861171	0.632046	-0.446271	-0.232033	0.6363	0.999642	no	0.777341	0.491393	1.31478	0.79008	0.529171	0.418851
ENSMUSG00000031165	Was	X:8081452-8090498	OK	0.547977	0.402258	-0.445996	-0.882114	0.077	0.569042	no	0.442239	0.649101	0.552592	0.381191	0.491905	0.354744
ENSMUSG00000061013	Mkx	18:6910458-7004780	OK	4.161	3.05512	-0.445701	-1.11012	0.03495	0.356779	no	4.25716	4.06362	4.16222	2.39936	3.98111	3.44065
ENSMUSG00000032028	Nxpe2	9:48318005-48353454	OK	0.415611	0.305187	-0.445543	-0.501638	0.2443	0.931559	no	0.474201	0.543624	0.229008	0.29609	0.339061	0.289506
ENSMUSG00000029231	Pdgfra	5:75152291-75198215	OK	30.5738	22.4517	-0.445472	-1.83784	5e-05	0.002075	yes	29.201	31.6351	30.8853	20.5992	23.9476	24.6606
ENSMUSG00000085601	Gm4969	7:19099045-19118368	OK	0.39989	0.293667	-0.445423	-0.858882	0.11315	0.687551	no	0.22463	0.468366	0.506674	0.292866	0.201604	0.387331
ENSMUSG00000024778	Fas	19:34290658-34327770	OK	0.340609	0.250166	-0.445233	-0.60562	0.1908	0.864831	no	0.420794	0.342379	0.258653	0.264933	0.206632	0.264164
ENSMUSG00000055235	Wdr86	5:24711737-24730727	OK	38.8283	28.5258	-0.444839	-1.66084	0.00365	0.0740627	no	36.0371	36.785	43.6628	26.3679	30.9605	30.407
ENSMUSG00000039519	Cyp7b1	3:18071949-18243338	OK	0.987182	0.725283	-0.444771	-1.16399	0.03015	0.326335	no	0.884972	0.816217	1.26036	0.593752	0.810407	0.903221
ENSMUSG00000080797	Gm15760	16:20545917-20546200	OK	0.580323	0.42651	-0.444277	-0.257345	0.65705	0.999642	no	0.543774	1.1972	0	0.562452	0.279158	0.301979
ENSMUSG00000103532	Gm4430	2:129196085-129197126	OK	1.9794	1.45524	-0.443805	-1.11877	0.04085	0.398535	no	2.01643	2.15806	1.76371	1.47736	1.4665	1.39975
ENSMUSG00000039629	Strip2	6:29917011-29959681	OK	0.368256	0.270779	-0.443592	-1.07191	0.04505	0.421104	no	0.354683	0.357264	0.39282	0.256917	0.215672	0.353609
ENSMUSG00000085894	Gm15832	1:39547569-39577405	OK	0.954215	0.701748	-0.44336	-0.432151	0.41805	0.999642	no	1.01494	0.840691	1.00702	0.649642	0.549949	0.95776
ENSMUSG00000084128	Esrp2	8:106058839-106138525	OK	5.642	4.14977	-0.443176	-0.272924	0.33205	0.999642	no	6.5264	5.68039	4.71921	3.76736	3.87576	5.1886
ENSMUSG00000078768	Zfp566	7:30054488-30090527	OK	9.65724	7.10493	-0.442792	-1.17218	0.03515	0.358599	no	8.79332	11.4049	8.77355	6.72538	7.63074	7.3382
ENSMUSG00000048164	Gm7204	16:48218604-48219204	OK	0.8449	0.621949	-0.441985	-0.671436	0.20795	0.889114	no	0.886245	0.585358	1.0631	0.794461	0.242652	0.656221
ENSMUSG00000026463	Atp2b4	1:133699456-133801041	OK	5.31843	3.91555	-0.441786	-1.24034	0.01705	0.22315	no	5.01159	4.97176	5.97194	3.31014	4.19624	4.84566
ENSMUSG00000059439	Bcas3	11:85353166-85832223	OK	10.6938	7.88117	-0.440295	-1.01036	0.0471	0.432435	no	9.84376	12.431	9.80667	7.23299	9.26286	7.79583
ENSMUSG00000041695	Kcnj2	11:111066163-111076821	OK	3.84787	2.83632	-0.440042	-2.0887	0.0003	0.00993006	yes	3.84817	3.41752	4.27792	2.0759	3.54632	3.64714
ENSMUSG00000027848	Olfml3	3:103722221-103738001	OK	3.49104	2.57365	-0.439843	-1.85847	0.0003	0.00993006	yes	3.20617	3.60283	3.66411	2.14589	3.04742	2.95538
ENSMUSG00000033170	Card10	15:78775137-78803042	OK	2.78814	2.05588	-0.439547	-1.47637	0.00915	0.146729	no	2.75637	2.30856	3.29949	2.20138	1.85475	1.96602
ENSMUSG00000074342	I830077J02Rik	3:105924357-105932664	OK	0.421749	0.311113	-0.438947	-0.441345	0.3618	0.999642	no	0.359823	0.467885	0.437537	0.291056	0.349824	0.312515
ENSMUSG00000070803	Cited4	4:120666571-120667820	OK	5.17471	3.81765	-0.438791	-1.52039	0.00525	0.0974317	no	4.98148	5.92833	4.61431	3.48147	4.4696	3.83807
ENSMUSG00000087119	Atg4a-ps	3:103575230-103646068	OK	0.536216	0.395793	-0.438069	-0.439173	0.38625	0.999642	no	0.405181	0.446024	0.757444	0.393696	0.441222	0.354559
ENSMUSG00000042962	Gm5436	12:84258331-84258973	OK	8.50517	6.28049	-0.437462	-1.34613	0.0151	0.207321	no	5.55732	9.99994	9.95823	4.4217	11.4119	4.86669
ENSMUSG00000106463	Mir1291	15:98518820-98534244	OK	3.89668	2.87782	-0.437269	-0.407375	0.76875	0.999642	no	5.56451	6.12552	0	5.75564	0	0
ENSMUSG00000021701	Plk2	13:110395043-110400844	OK	22.9736	16.9685	-0.437119	-2.51266	5e-05	0.002075	yes	23.1336	21.6277	24.1595	15.3043	18.7347	18.5306
ENSMUSG00000107928	Gm45140	6:87788852-87838798	OK	4.82754	3.5665	-0.43678	-0.303712	0.54895	0.999642	no	3.47672	5.52455	5.48136	1.8553	6.71237	3.84304
ENSMUSG00000074874	Ctla2b	13:60895350-60897447	OK	1.00561	0.743018	-0.436606	-0.914093	0.0917	0.628729	no	1.11743	0.821295	1.07811	0.568426	0.92395	0.911271
ENSMUSG00000029819	Npy	6:49822709-49829507	OK	0.431407	0.318859	-0.436129	-0.488309	0.3847	0.999642	no	0.452274	0.426748	0.415198	0	0.199015	1.07642
ENSMUSG00000066026	Dhrs3	4:144892826-144928209	OK	8.31486	6.1461	-0.436021	-1.52748	0.0046	0.0880396	no	8.21828	8.53521	8.1911	4.68381	7.80075	7.41604
ENSMUSG00000068466	Gm5518	19:29160117-29160765	OK	4.10727	3.03776	-0.435171	-1.1129	0.03835	0.381123	no	4.53357	4.46837	3.31986	2.01749	3.13929	4.97678
ENSMUSG00000099204	Gm27943	1:75171716-75210813	OK	6.79989	5.03097	-0.434675	-0.366394	0.79745	0.999642	no	0	15.1576	5.24206	3.5507	13.0225	0
ENSMUSG00000094974	Rps19-ps2	14:52902792-52903230	OK	0.705346	0.521926	-0.434485	-0.44868	0.4279	0.999642	no	0.797921	0.54898	0.769136	0.412664	0.81926	0.443116
ENSMUSG00000095427	Rps2-ps6	14:76236687-76237353	OK	0.661442	0.489522	-0.43424	-0.638818	0.2249	0.905355	no	0.608021	0.725098	0.651207	0.524087	0.572258	0.337657
ENSMUSG00000028773	Fabp3	4:130308161-130359943	OK	4.72618	3.4985	-0.433939	-0.572703	0.288	0.969188	no	4.3145	4.41619	5.44786	3.32745	3.80815	3.53096
ENSMUSG00000028369	Svep1	4:58042441-58206859	OK	0.535928	0.396748	-0.433816	-1.40294	0.0079	0.131404	no	0.441878	0.541719	0.624188	0.397557	0.348134	0.443745
ENSMUSG00000044468	Fam46c	3:100451627-100489324	OK	1.06083	0.785783	-0.432991	-1.27466	0.0091	0.146069	no	0.86367	1.23655	1.08227	0.701268	0.910838	0.829758
ENSMUSG00000043953	Ccrl2	9:111054485-111057519	OK	0.344367	0.255142	-0.432647	-0.363636	0.4129	0.999642	no	0.446622	0.404958	0.181522	0.204571	0.327376	0.284051
ENSMUSG00000024529	Lox	18:52516068-52529867	OK	2.28973	1.69786	-0.431455	-1.66337	0.00165	0.0406762	yes	2.11704	2.02771	2.72443	1.2014	2.19456	2.19409
ENSMUSG00000052783	Grk4	5:34660378-34755305	OK	0.939054	0.69639	-0.431313	-0.463209	0.2741	0.956716	no	0.86589	0.723302	1.22797	0.714557	0.713092	0.643354
ENSMUSG00000073102	Drc1	5:30281387-30366695	OK	0.386012	0.286277	-0.431233	-0.280225	0.5328	0.999642	no	0.24946	0.573053	0.335522	0.117773	0.817576	0.0919849
ENSMUSG00000021994	Wnt5a	14:28504749-28527447	OK	26.0958	19.3534	-0.431229	-0.997869	0.02555	0.292048	no	24.4169	23.3683	30.5024	15.0762	22.7432	24.5181
ENSMUSG00000024873	Cnih2	19:5088537-5098418	OK	19.6616	14.5839	-0.430997	-1.3928	0.0139	0.197749	no	18.6589	18.4161	21.9097	12.0213	16.8972	17.3961
ENSMUSG00000096655	1700065D16Rik	9:95855417-96057803	OK	0.632642	0.469368	-0.430672	-0.183101	0.5721	0.999642	no	0.554385	0.643333	0.700209	0.368617	0.573234	0.567003
ENSMUSG00000049687	Fam109b	15:82338941-82349091	OK	2.44749	1.81632	-0.430281	-0.481619	0.2775	0.959431	no	1.64368	2.88569	2.8131	1.87167	2.11496	1.40699
ENSMUSG00000015243	Abca1	4:53030786-53159895	OK	1.81892	1.35022	-0.429883	-0.81159	0.12625	0.718007	no	1.26687	2.70188	1.48799	1.13748	1.51078	1.61515
ENSMUSG00000040310	Alx4	2:93642383-93822568	OK	34.7497	25.8061	-0.42929	-2.24449	5e-05	0.002075	yes	35.9001	33.272	35.0769	25.9368	25.6142	25.7365
ENSMUSG00000032940	Rbm11	16:75592843-75602829	OK	0.309771	0.230057	-0.429215	-0.699485	0.17025	0.823191	no	0.235171	0.366722	0.327421	0.222909	0.202798	0.27161
ENSMUSG00000037336	Mfsd2b	12:4862439-4874359	OK	1.22105	0.907016	-0.428923	-0.973447	0.0551	0.477987	no	0.913014	1.75234	0.997796	0.991202	0.950105	0.695553
ENSMUSG00000071041	Gm15210	8:100030557-100032102	OK	0.483222	0.358974	-0.428808	-0.817072	0.1373	0.747211	no	0.489757	0.44286	0.51705	0.289474	0.448977	0.407971
ENSMUSG00000074024	4632427E13Rik	7:92734165-92741468	OK	0.85552	0.635916	-0.427967	-0.50782	0.2945	0.972074	no	0.55122	1.04776	0.967586	0.621522	0.586846	0.713773
ENSMUSG00000080994	Gm13464	2:43518463-43519398	OK	0.539905	0.401413	-0.427618	-0.69833	0.19295	0.868369	no	0.448827	0.635243	0.535644	0.464244	0.427914	0.249251
ENSMUSG00000045876	Pcdhb8	18:36930183-37841873	OK	0.353565	0.262951	-0.427183	-0.0600566	0.72445	0.999642	no	0.318133	0.239378	0.503185	0.240985	0.277162	0.292672
ENSMUSG00000024776	Stambpl1	19:34192228-34240333	OK	3.31121	2.46264	-0.427151	-1.35972	0.0083	0.136138	no	3.50691	3.28874	3.13799	2.27501	2.65302	2.64754
ENSMUSG00000051920	Rspo2	15:43020810-43170818	OK	12.1814	9.06056	-0.427005	-2.31532	5e-05	0.002075	yes	11.5018	12.3385	12.7039	8.32547	9.31467	10.2766
ENSMUSG00000066800	Rnasel	1:153749425-153764221	OK	4.84305	3.60393	-0.426347	-1.32959	0.00355	0.0726584	no	4.57342	3.63497	6.32076	2.65606	4.13673	4.96684
ENSMUSG00000019853	Hebp2	10:18540122-18546076	OK	6.68103	4.97226	-0.426171	-1.77726	0.0009	0.0254108	yes	6.73855	6.14629	7.15826	4.2389	5.77505	5.63617
ENSMUSG00000026640	Plxna2	1:194618217-194816869	OK	5.70355	4.2466	-0.425551	-2.19545	5e-05	0.002075	yes	5.11271	5.88088	6.11706	4.04849	4.27915	4.61027
ENSMUSG00000023094	Msrb2	2:19371439-19394976	OK	14.757	10.9875	-0.425542	-0.810051	0.1138	0.688561	no	12.3954	17.9949	13.8808	9.39247	14.7208	10.4442
ENSMUSG00000019987	Arg1	10:24915207-24927470	OK	6.76425	5.03717	-0.425316	-1.65566	0.00195	0.0460775	yes	6.45368	5.80526	8.0338	5.20677	4.92237	4.81276
ENSMUSG00000027793	Ccna1	3:55045468-55084002	OK	1.52518	1.13582	-0.425239	-0.5341	0.3017	0.978791	no	1.46149	1.95097	1.16307	1.27976	0.652294	1.33148
ENSMUSG00000002396	Ocel1	8:71371297-71381960	OK	1.58862	1.18328	-0.424983	-0.252235	0.54665	0.999642	no	2.22118	1.53385	1.01082	0.977472	1.47576	1.30241
ENSMUSG00000063021	Hist1h2ak	13:21753434-21753827	OK	1.69307	1.26119	-0.424851	-0.631261	0.2301	0.913137	no	0.985904	2.98458	1.10873	1.14724	1.5184	1.2319
ENSMUSG00000051159	Cited1	X:102247380-102252181	OK	38.891	28.9726	-0.42475	-1.45252	0.0103	0.160042	no	36.6125	40.928	39.1325	21.7049	41.3823	31.0982
ENSMUSG00000096810	Gm10481	5:13042432-13043434	OK	0.358492	0.267069	-0.424727	-0.613828	0.2498	0.93511	no	0.293722	0.291001	0.490752	0.364573	0.241262	0.097869
ENSMUSG00000105135	Gm43667	3:34019942-34081321	OK	0.829781	0.618504	-0.423947	-0.140956	0.85105	0.999642	no	1.02614	0.753064	0.710139	0.381021	0.8645	0.847476
ENSMUSG00000032024	Clmp	9:40685961-40785319	OK	27.6208	20.5973	-0.4233	-2.2651	5e-05	0.002075	yes	27.1595	27.9433	27.7595	19.0414	21.5755	22.7309
ENSMUSG00000080885	Rpl10-ps6	19:37268742-37337852	OK	0.376737	0.280952	-0.423232	-0.119919	0.82055	0.999642	no	0.267182	0.5883	0.274729	0.276356	0.274324	0.296773
ENSMUSG00000037940	Inpp4b	8:81342555-82127914	OK	1.96998	1.4692	-0.423154	-0.844293	0.0336	0.3486	no	1.90449	1.66808	2.33737	1.28409	1.47688	1.83173
ENSMUSG00000090173	Fbxw10	11:62820230-62877465	OK	0.392724	0.2929	-0.423107	-0.318105	0.49615	0.999642	no	0.360689	0.518334	0.29915	0.30191	0.255778	0.312003
ENSMUSG00000083411	Rpl30-ps10	X:71803687-71804034	OK	4.48123	3.34219	-0.423099	-0.810117	0.135	0.741591	no	5.4948	4.62554	3.32334	3.84474	2.98681	2.69247
ENSMUSG00000025978	Rftn2	1:55170158-55235622	OK	8.33664	6.21783	-0.423056	-1.84821	0.00085	0.024374	yes	7.74106	8.00311	9.26576	5.76096	6.45127	6.89812
ENSMUSG00000074121	Ntf5	7:45413694-45417179	OK	3.47181	2.59005	-0.422711	-1.48769	0.00625	0.110882	no	3.81783	2.79046	3.80714	2.17354	2.725	3.28811
ENSMUSG00000070407	Hs3st3b1	11:63885791-63922290	OK	4.02572	3.00397	-0.422378	-1.99521	0.0003	0.00993006	yes	3.91476	4.30396	3.85846	2.89378	2.94931	3.27902
ENSMUSG00000100441	Gm7266	1:144312031-144312436	OK	0.570029	0.425376	-0.422298	-0.336247	0.49835	0.999642	no	0.347912	0.765977	0.596198	0.359862	0.59536	0.386418
ENSMUSG00000048406	B330016D10Rik	4:141546188-141547892	OK	1.87859	1.4019	-0.422263	-1.22676	0.023	0.273303	no	1.82976	1.99702	1.80898	1.14851	1.57361	1.73699
ENSMUSG00000038967	Pdk2	11:95026257-95041354	OK	6.51968	4.86603	-0.422056	-0.953565	0.07335	0.556247	no	6.79489	7.77944	4.98471	4.22548	6.29902	4.71413
ENSMUSG00000029330	Cds1	5:101765129-101823858	OK	1.26347	0.94308	-0.421943	-0.598155	0.2592	0.941288	no	1.12792	1.39724	1.26526	1.02113	0.791395	0.938672
ENSMUSG00000081559	Gm12411	4:45550016-45550499	OK	0.384881	0.287398	-0.421361	-0.328807	0.45275	0.999642	no	0.586141	0.460883	0.107618	0.259832	0.257921	0.372007
ENSMUSG00000032454	Rbp2	9:98486114-98509781	OK	0.644727	0.481454	-0.421291	-0.350654	0.40475	0.999642	no	0.575294	0.379725	0.979161	0.59466	0.48108	0.255415
ENSMUSG00000024935	Slc1a1	19:28835048-28967800	OK	0.386	0.288297	-0.421042	-0.432206	0.3548	0.999642	no	0.275547	0.497462	0.384991	0.297585	0.268066	0.289955
ENSMUSG00000087336	Gm15860	5:123332725-123374992	OK	1.49718	1.11825	-0.421009	-0.123027	0.74995	0.999642	no	1.54859	1.88474	1.05821	1.26276	1.38611	0.561357
ENSMUSG00000100201	Gm29093	10:80583653-80590341	OK	4.05815	3.03133	-0.420874	-0.241455	0.64095	0.999642	no	3.86687	4.50712	3.80046	3.52915	2.91958	2.14742
ENSMUSG00000039236	Isg20	7:78913423-78920396	OK	0.362097	0.270528	-0.420597	-0.432858	0.2873	0.969139	no	0.345932	0.364619	0.375739	0.228136	0.379762	0.246078
ENSMUSG00000027524	Edn3	2:174760618-174784042	OK	7.85731	5.87052	-0.420548	-1.93563	0.00025	0.00851392	yes	7.03306	7.76145	8.77741	5.69181	5.84886	6.24959
ENSMUSG00000029499	Pxmp2	5:110259129-110286186	OK	3.19813	2.3899	-0.42028	-0.329183	0.55235	0.999642	no	3.57396	2.22925	3.79117	2.64289	2.2477	2.0261
ENSMUSG00000079444	Gm21981	17:47611581-47704286	OK	0.635275	0.47475	-0.420213	-0.208398	0.79205	0.999642	no	0.45854	0.729196	0.718088	0.423388	0.696571	0.355652
ENSMUSG00000000402	Egfl6	X:166523006-166585720	OK	1.25099	0.935114	-0.419857	-1.25586	0.0203	0.250594	no	1.03256	1.333	1.38741	0.776749	1.05054	1.13642
ENSMUSG00000046312	AI464131	4:41495603-41503076	OK	3.09588	2.31484	-0.419438	-1.64054	0.0012	0.0321238	yes	3.08129	3.12044	3.0859	1.96241	2.59189	2.74265
ENSMUSG00000054716	Zfp771	7:127244273-127254803	OK	19.0891	14.2742	-0.419341	-1.63912	0.0053	0.0981391	no	17.6153	18.9348	20.7173	12.0755	20.0286	12.9172
ENSMUSG00000069378	Prdm6	18:53464545-53575907	OK	0.53548	0.400427	-0.419291	-0.818631	0.12425	0.713573	no	0.681693	0.42656	0.498185	0.418948	0.4152	0.348613
ENSMUSG00000059336	Slc14a1	18:78100090-78142119	OK	0.356428	0.266543	-0.419242	-0.833235	0.1105	0.680764	no	0.354891	0.354754	0.359638	0.238714	0.310008	0.278734
ENSMUSG00000028631	Kcnq4	4:120696137-120748612	OK	1.5096	1.12908	-0.419017	-1.41396	0.00635	0.112294	no	1.6427	1.67617	1.20991	0.954125	1.31687	1.29119
ENSMUSG00000020220	Vps13d	4:144972621-145195005	OK	6.42026	4.80266	-0.418796	-0.734995	0.1559	0.790848	no	6.97878	6.8751	5.40689	4.80623	4.45333	5.14487
ENSMUSG00000052085	Dock8	19:24999528-25202432	OK	0.658119	0.492462	-0.418337	-1.42636	0.00795	0.131837	no	0.620396	0.631979	0.721982	0.482077	0.48804	0.517652
ENSMUSG00000025429	Pstpip2	18:77793258-77882007	OK	0.669552	0.50103	-0.418298	-0.849827	0.1112	0.683038	no	0.649824	0.802047	0.556784	0.448096	0.626766	0.481163
ENSMUSG00000039956	Mrap	16:90738323-90749785	OK	0.931196	0.696969	-0.41799	-0.755473	0.12975	0.726714	no	0.941086	0.584117	1.26839	0.81681	0.6643	0.489957
ENSMUSG00000103332	Pcdhga2	18:36930183-37841873	OK	0.87714	0.656661	-0.417659	-0.218612	0.7126	0.999642	no	0.765962	1.00472	0.860743	0.500757	0.836821	0.788309
ENSMUSG00000043099	Hic1	11:75164564-75169519	OK	1.34416	1.00647	-0.417398	-0.885167	0.0901	0.62206	no	1.22765	1.36764	1.43719	0.584572	1.3716	1.48514
ENSMUSG00000058145	Adamts17	7:66839734-67153171	OK	1.33721	1.00167	-0.416812	-0.369825	0.3099	0.986817	no	1.26148	0.985074	1.76507	0.93925	0.662934	1.46526
ENSMUSG00000066607	6030419C18Rik	9:58488602-58499742	OK	6.75803	5.06243	-0.416773	-1.79722	0.0004	0.0129039	yes	6.96022	5.73979	7.57407	4.50269	5.45315	5.79118
ENSMUSG00000080851	Gm12094	11:29692946-30026033	OK	0.773535	0.579517	-0.416615	-0.064433	0.76345	0.999642	no	0.785073	0.86346	0.672073	0.451136	0.447779	0.968019
ENSMUSG00000040260	Daam2	17:49456021-49564337	OK	3.76485	2.82059	-0.416597	-2.01699	0.0003	0.00993006	yes	3.57289	3.73402	3.98765	2.02864	3.68082	3.54426
ENSMUSG00000018819	Lsp1	7:142460808-142516009	OK	19.3987	14.5336	-0.416564	-1.30156	0.01465	0.204198	no	18.7669	18.5008	20.9282	14.6189	14.9046	13.9921
ENSMUSG00000064634	Gm22620	9:15315188-15315321	OK	50.4351	37.7917	-0.41636	-0.652674	0.215	0.895156	no	44.8729	53.1967	53.2358	39.2735	49.617	23.0027
ENSMUSG00000026249	Serpine2	1:79794196-79861180	OK	48.3733	36.2495	-0.416249	-1.81149	0.0005	0.0156708	yes	45.942	46.2477	52.9301	36.8791	35.1137	36.1261
ENSMUSG00000050212	Eva1b	4:126147743-126149875	OK	23.4127	17.5557	-0.415348	-1.98542	0.00015	0.00546921	yes	24.1181	24.0139	22.1061	15.4677	19.851	19.4365
ENSMUSG00000035594	Chrna5	9:54980879-55007779	OK	0.482788	0.362066	-0.415137	-0.954543	0.07765	0.572309	no	0.51862	0.489349	0.440397	0.249058	0.456419	0.49373
ENSMUSG00000052221	Ppp1r36	12:76417598-76439473	OK	1.12563	0.844385	-0.414757	-0.977558	0.07065	0.546058	no	0.704943	0.859909	1.81203	0.650329	0.997664	1.07922
ENSMUSG00000091449	Gm10269	18:20682591-20682963	OK	1.50952	1.1324	-0.414703	-0.5768	0.30235	0.979968	no	1.65999	1.97963	0.888948	0.71542	1.56235	1.53643
ENSMUSG00000029864	Gstk1	6:42245934-42250447	OK	14.4084	10.8089	-0.414693	-1.68903	0.00205	0.0480964	yes	12.8042	13.0731	17.3479	9.83196	12.061	11.5107
ENSMUSG00000030638	Sh3gl3	7:82172664-82307419	OK	9.63165	7.22619	-0.414548	-1.39414	0.0109	0.165474	no	7.09656	9.06427	12.7341	4.5933	9.39328	10.3249
ENSMUSG00000063765	Chadl	15:81663888-81697287	OK	0.790807	0.593307	-0.414547	-0.238772	0.7143	0.999642	no	1.03453	0.760721	0.577166	0.472389	0.844297	0.584154
ENSMUSG00000003134	Tbc1d8	1:39367841-39478755	OK	4.15436	3.11743	-0.41427	-0.345205	0.4757	0.999642	no	4.10947	4.10998	4.24361	3.25948	3.00183	2.94891
ENSMUSG00000001288	Rarg	15:102234937-102257517	OK	53.9782	40.5332	-0.413275	-1.88934	0.00015	0.00546921	yes	54.8974	50.0222	57.0151	41.0298	39.3509	40.7221
ENSMUSG00000000861	Bcl11a	11:24078055-24174123	OK	25.9935	19.5191	-0.413264	-1.93801	0.0003	0.00993006	yes	27.6408	25.7205	24.619	14.9103	24.5387	23.7169
ENSMUSG00000089768	Tmsb15b1	X:136954987-136976874	OK	14.4956	10.8899	-0.412624	-0.833309	0.12275	0.711141	no	14.1581	13.7664	15.5624	9.19565	13.3643	11.8041
ENSMUSG00000060708	Bloc1s4	5:36747377-36750437	OK	10.3799	7.79988	-0.412272	-1.71207	0.00145	0.0366203	yes	10.4415	10.0695	10.6287	6.82952	9.25679	8.28368
ENSMUSG00000097350	4732491K20Rik	17:12318884-12327250	OK	0.617833	0.464559	-0.411354	-1.06513	0.0527	0.46773	no	0.503257	0.765041	0.585202	0.413129	0.508514	0.523466
ENSMUSG00000004267	Eno2	6:124760052-124769673	OK	2.96928	2.23276	-0.411288	-0.630629	0.203	0.881645	no	2.16481	3.36805	3.37497	2.01981	1.80511	3.08629
ENSMUSG00000026674	Ddr2	1:169969408-170110762	OK	16.6191	12.4968	-0.411284	-1.34988	0.0092	0.147387	no	14.7295	16.3964	18.7314	11.3144	12.438	14.9203
ENSMUSG00000108866	Gm44791	7:100675087-100677760	OK	0.833662	0.62727	-0.410377	-0.359861	0.62785	0.999642	no	0	0	2.50099	0.177777	2.15353	0
ENSMUSG00000023411	Nfatc4	14:55824794-55833943	OK	39.6009	29.8042	-0.410016	-2.47394	5e-05	0.002075	yes	41.6772	37.219	39.9064	28.5537	30.457	31.6525
ENSMUSG00000106926	Rpl7-ps7	5:82336850-82337649	OK	0.932697	0.701966	-0.410008	-0.748039	0.1676	0.816601	no	0.984236	0.65008	1.16378	0.651547	0.848869	0.655901
ENSMUSG00000064380	Gm26448	9:120127765-120132369	OK	5.06884	3.81526	-0.409875	-0.0305678	0.78365	0.999642	no	3.82768	8.42717	2.95168	4.75098	2.35803	3.40105
ENSMUSG00000025400	Tac2	10:127724477-127731767	OK	0.328392	0.247178	-0.409872	-0.421267	0.3963	0.999642	no	0.344277	0.324846	0.316054	0.30523	0.0504965	0.327754
ENSMUSG00000061414	Cracr2a	6:127561337-127674248	OK	0.383919	0.289054	-0.409461	-0.478537	0.3405	0.999642	no	0.362776	0.417212	0.371769	0.202039	0.372768	0.379372
ENSMUSG00000042436	Mfap4	11:61485430-61494406	OK	78.3414	58.9968	-0.409139	-0.944274	0.08295	0.594397	no	70.758	80.7034	83.5629	45.2779	75.4223	70.009
ENSMUSG00000069516	Lyz2	10:117277333-117282274	OK	3.16143	2.38132	-0.408816	-1.24205	0.02265	0.270702	no	2.03139	3.45152	4.00136	2.48943	2.58448	1.96193
ENSMUSG00000051041	Olfml1	7:107567445-107591094	OK	7.77422	5.85606	-0.408767	-1.70907	0.0014	0.03574	yes	6.8268	7.13147	9.36439	5.4557	6.83047	5.68237
ENSMUSG00000082013	Gm13216	2:5293456-5714515	OK	0.853794	0.643228	-0.408558	-0.299129	0.57695	0.999642	no	0.785888	0.532374	1.24312	0.875399	0.620687	0.201428
ENSMUSG00000085207	Gm11767	11:119935802-119942698	OK	0.418923	0.315616	-0.408516	-0.390321	0.53375	0.999642	no	0.485107	0.35601	0.415651	0.250885	0.581094	0.179599
ENSMUSG00000024112	Cacna1h	17:25369272-25433783	OK	4.80141	3.61739	-0.408506	-0.780578	0.11385	0.688561	no	4.17274	5.02116	5.21031	2.95892	4.92185	3.62987
ENSMUSG00000107539	Gm44790	6:86404218-86480830	OK	1.9538	1.47239	-0.408124	-0.168114	0.85175	0.999642	no	1.17965	3.43277	1.24899	1.11997	2.13434	1.51529
ENSMUSG00000037129	Tmprss13	9:45318264-45347581	OK	0.473201	0.356608	-0.408112	-0.985031	0.067	0.530762	no	0.501655	0.382314	0.535633	0.399143	0.28527	0.342877
ENSMUSG00000025783	4930412O13Rik	2:9857077-9890034	OK	2.78834	2.10239	-0.407374	-0.441225	0.4142	0.999642	no	3.00004	3.32539	2.03958	1.70299	2.47267	2.53091
ENSMUSG00000038175	Mylip	13:45389741-45412019	OK	7.08534	5.34304	-0.407178	-1.95613	0.00045	0.0142116	yes	6.70895	7.22264	7.32444	4.84993	5.82603	5.84626
ENSMUSG00000037625	Cldn11	3:31149919-31164324	OK	6.36283	4.8005	-0.406484	-1.6651	0.0024	0.0544516	no	6.42141	6.27823	6.38885	3.93275	5.39308	5.94343
ENSMUSG00000067818	Myl9	2:156775419-156781658	OK	49.8239	37.592	-0.406409	-1.30417	0.01465	0.204198	no	38.7929	59.0507	51.6279	32.4572	45.8929	39.561
ENSMUSG00000037493	Cib2	9:54538983-54560218	OK	7.09468	5.35417	-0.406075	-1.58912	0.00295	0.0631155	no	6.79372	6.76441	7.72592	5.30978	5.85856	4.93857
ENSMUSG00000074981	Dcdc5	2:105966708-106406151	OK	0.805834	0.608167	-0.406016	-0.163883	0.8125	0.999642	no	0.541832	0.55563	1.32004	1.0135	0.251756	0.153913
ENSMUSG00000097855	A930007I19Rik	19:29486354-29606829	OK	0.353451	0.26677	-0.405912	-0.189421	0.73155	0.999642	no	0.344967	0.24209	0.473295	0.199259	0.355653	0.312908
ENSMUSG00000103081	Pcdhgb8	18:36930183-37841873	OK	0.977276	0.73777	-0.405596	-0.221346	0.6793	0.999642	no	1.00012	0.915136	1.01657	0.609484	0.863193	0.868918
ENSMUSG00000064451	Snora23	7:109998375-110151202	OK	4.09578	3.09202	-0.405589	-0.0330133	0.807	0.999642	no	3.21999	3.54588	5.52146	4.44103	1.10248	2.38353
ENSMUSG00000019820	Utrn	10:12382187-12861735	OK	7.12522	5.37935	-0.405502	-2.40786	5e-05	0.002075	yes	6.28687	7.14992	7.93887	5.11092	5.31286	5.98271
ENSMUSG00000033685	Ucp2	7:100493336-100514960	OK	61.6198	46.5278	-0.405301	-1.4569	0.0061	0.108805	no	53.9187	68.2624	62.6782	39.3607	55.5262	51.8635
ENSMUSG00000030255	Sspn	6:145931640-145965223	OK	1.23198	0.93038	-0.405091	-1.3912	0.0087	0.141714	no	1.14393	1.33873	1.21329	0.832851	1.03198	1.02383
ENSMUSG00000086390	1810019D21Rik	8:106058839-106138525	OK	1.45262	1.09741	-0.404556	-0.215964	0.73625	0.999642	no	1.0952	1.53766	1.72501	0.850716	1.22684	1.46137
ENSMUSG00000032373	Car12	9:66713685-66766845	OK	6.70406	5.06605	-0.404174	-1.94384	0.00025	0.00851392	yes	6.5472	7.11337	6.45163	4.73562	5.67108	5.12188
ENSMUSG00000036158	Prickle1	15:93499113-93595891	OK	6.81784	5.15233	-0.404091	-2.05285	0.0002	0.00702851	yes	6.48536	6.91125	7.05692	4.33814	6.02851	5.90452
ENSMUSG00000078154	Gm12184	11:48825345-48853493	OK	1.18174	0.893402	-0.403529	-0.830949	0.12885	0.725116	no	1.46301	0.746905	1.33529	0.943048	0.674873	1.01264
ENSMUSG00000081792	Anp32b-ps1	4:143389658-143390416	OK	0.501323	0.37911	-0.403125	-0.580948	0.2824	0.964658	no	0.549583	0.465379	0.489007	0.349822	0.34725	0.469545
ENSMUSG00000043807	Ly6g5b	17:35113947-35115428	OK	0.273046	0.206491	-0.403065	-0.491265	0.31115	0.987188	no	0.144756	0.459699	0.214683	0.174654	0.39628	0.0803752
ENSMUSG00000066258	Trim12a	7:104299893-104324838	OK	1.10561	0.836143	-0.403021	-0.626492	0.2401	0.927057	no	0.67301	2.01564	0.628181	0.782684	0.518278	1.26092
ENSMUSG00000035000	Dpp4	2:62330072-62470913	OK	0.495521	0.374867	-0.402567	-0.28478	0.5188	0.999642	no	0.116404	1.21512	0.155045	0.179592	0.477363	0.662923
ENSMUSG00000032717	Mdfi	17:47815327-47834691	OK	127.591	96.5485	-0.402202	-1.67566	0.00235	0.0536118	no	131.808	107.726	143.239	87.0029	115.275	96.9126
ENSMUSG00000028480	Glipr2	4:43957400-43979118	OK	33.1837	25.114	-0.401982	-2.28839	0.0001	0.00392328	yes	31.5421	30.9894	37.0195	21.2206	28.4271	29.5878
ENSMUSG00000037206	Islr	9:58156264-58159221	OK	8.3216	6.29797	-0.401974	-1.80264	0.00135	0.0349498	yes	7.94835	7.96276	9.0537	4.63585	8.23622	7.68396
ENSMUSG00000021895	Arhgef3	14:27238038-27403904	OK	1.96395	1.48641	-0.401927	-1.47175	0.0064	0.112696	no	1.86045	1.87226	2.15914	1.33556	1.63223	1.64229
ENSMUSG00000037890	Wdr19	5:65199695-65260415	OK	4.66305	3.52947	-0.401822	-1.23189	0.0294	0.320105	no	4.79481	5.01033	4.18401	3.24733	3.99746	3.62576
ENSMUSG00000069301	Hist1h2ag	13:22042459-22042944	OK	2.43874	1.8461	-0.401655	-0.761807	0.15595	0.790859	no	2.49424	2.47114	2.35084	0.773974	3.1585	2.67795
ENSMUSG00000084284	Tpt1-ps6	X:101768534-101769057	OK	0.917635	0.694775	-0.401374	-0.573671	0.2814	0.964091	no	0.439688	1.37138	0.941836	0.606387	0.75241	0.813918
ENSMUSG00000098998	Gm27913	15:62037985-62378096	OK	5.2873	4.00438	-0.400953	-0.162283	0.7921	0.999642	no	8.30377	3.0215	4.53663	5.14422	5.08891	0.640167
ENSMUSG00000094326	Gm10045	17:29308137-29308620	OK	0.638804	0.483869	-0.400756	-0.429759	0.40755	0.999642	no	0.502406	0.553059	0.860946	0.606274	0.257921	0.465009
ENSMUSG00000027291	Vps39	2:120316460-120353137	OK	16.0536	12.1635	-0.400335	-0.389665	0.3624	0.999642	no	16.7172	16.1212	15.3225	10.7433	13.8741	13.2934
ENSMUSG00000025578	Cbx8	11:119036304-119040969	OK	10.3807	7.86667	-0.400074	-1.0435	0.05385	0.474115	no	10.9605	10.1896	9.99187	7.8226	8.92764	6.89384
ENSMUSG00000044595	Dnd1	18:36760238-36766214	OK	0.940893	0.713454	-0.39921	-0.319218	0.59435	0.999642	no	1.0719	1.04351	0.707266	0.602224	0.80241	0.84696
ENSMUSG00000103149	AA914427	16:17922042-17923208	OK	0.752893	0.571053	-0.398821	-0.788989	0.1442	0.762669	no	0.75554	0.563418	0.939721	0.40335	0.800769	0.676742
ENSMUSG00000025993	Slc40a1	1:45908067-45926523	OK	4.9568	3.76105	-0.398275	-0.555357	0.2647	0.949208	no	4.34461	3.53202	6.99377	2.82294	4.74746	4.65085
ENSMUSG00000048285	Frmd6	12:70825513-70902232	OK	23.5131	17.8414	-0.398238	-2.39549	5e-05	0.002075	yes	23.0307	23.1085	24.4002	16.624	18.5409	19.5767
ENSMUSG00000072962	Gm16401	5:43993619-44102515	OK	1.21231	0.920608	-0.397105	-0.287565	0.594	0.999642	no	1.14289	1.29957	1.19448	0.701418	1.12183	1.15776
ENSMUSG00000047261	Gap43	16:42248441-42340651	OK	54.3481	41.3003	-0.396077	-2.19114	0.0001	0.00392328	yes	58.4654	52.485	52.0939	37.452	41.9627	48.3345
ENSMUSG00000037962	Fam101a	5:125003220-125012547	OK	1.58142	1.20213	-0.395627	-1.01337	0.0561	0.483109	no	1.78474	1.31129	1.64823	1.17258	1.1834	1.27996
ENSMUSG00000066224	Arid3c	4:41699988-41774247	OK	0.332691	0.252942	-0.395376	-0.114477	0.7074	0.999642	no	0.439408	0.336951	0.221715	0.22651	0.237444	0.321304
ENSMUSG00000044337	Ackr3	1:90203979-90216751	OK	16.1407	12.2721	-0.395326	-1.8098	0.00015	0.00546921	yes	14.9036	15.1059	18.4126	10.6011	14.3066	13.5795
ENSMUSG00000052364	B630019K06Rik	X:8892381-8894964	OK	2.74529	2.08766	-0.395068	-1.43961	0.00615	0.109579	no	2.77181	2.49748	2.96657	1.81612	2.18762	2.53079
ENSMUSG00000035270	Impg2	16:56204312-56273756	OK	0.307554	0.233963	-0.394562	-0.195266	0.6994	0.999642	no	0.205663	0.453024	0.263975	0.212466	0.0540835	0.456836
ENSMUSG00000062991	Nrg1	8:31814550-32884029	OK	2.39248	1.82016	-0.394444	-0.566844	0.2062	0.885775	no	2.98564	2.53074	1.66107	1.7502	2.20041	1.57983
ENSMUSG00000107276	Gm42858	5:38038741-38159907	OK	0.261363	0.19886	-0.3943	-0.135272	0.86575	0.999642	no	0.250224	0.292667	0.241197	0.161762	0.176629	0.295287
ENSMUSG00000026688	Mgst3	1:167371965-167393841	OK	18.1599	13.8183	-0.394175	-1.79887	0.0013	0.0339748	yes	15.909	19.1024	19.4683	13.0611	15.0676	14.0833
ENSMUSG00000095836	Gm21960	3:96412909-96413361	OK	1.99119	1.51534	-0.393992	-0.689687	0.20015	0.876412	no	1.41213	2.38356	2.17789	1.558	1.06325	1.8821
ENSMUSG00000003123	Lipe	7:25376818-25566417	OK	3.81258	2.90293	-0.393259	-1.18271	0.02135	0.259866	no	3.88598	3.98237	3.56939	2.90576	3.23573	2.56447
ENSMUSG00000020696	Rffl	11:82781107-82871210	OK	4.93506	3.75781	-0.393174	-0.689824	0.18035	0.845775	no	4.65167	4.57462	5.57888	3.1804	3.97368	4.69676
ENSMUSG00000037411	Serpine1	5:137061503-137072268	OK	0.918498	0.699436	-0.393085	-1.08192	0.04025	0.395249	no	0.85562	0.859656	1.04022	0.613753	0.859855	0.710383
ENSMUSG00000096982	Redrum	18:54422294-54452840	OK	1.11979	0.8528	-0.392955	-1.01298	0.0591	0.49753	no	1.1655	1.23366	0.96022	0.865512	0.966543	0.713632
ENSMUSG00000021991	Cacna2d3	14:28904942-29721864	OK	0.408887	0.311443	-0.392734	-0.7665	0.157	0.793018	no	0.255486	0.44407	0.527104	0.215582	0.448703	0.365904
ENSMUSG00000095687	Rnaset2a	17:8128609-8148097	OK	2.27061	1.72994	-0.392361	-1.0776	0.0469	0.431799	no	1.97817	3.03398	1.79969	1.14951	2.96674	1.654
ENSMUSG00000037826	Ppm1k	6:57476696-57664632	OK	2.07437	1.58058	-0.392224	-0.458226	0.16005	0.800105	no	1.70889	1.98689	2.52734	1.23308	1.41301	2.44314
ENSMUSG00000097040	2610316D01Rik	3:45280436-45378260	OK	4.41174	3.36196	-0.392045	-1.08323	0.04405	0.416232	no	3.50907	4.9876	4.73855	2.55197	3.59316	4.75074
ENSMUSG00000027978	Prss12	3:123444327-123506597	OK	1.34435	1.0248	-0.39156	-1.19308	0.0253	0.291003	no	1.25261	1.27117	1.50927	0.951478	1.05501	1.14125
ENSMUSG00000093803	Ppp2r3d	9:124476607-124476861	OK	9.17652	6.99622	-0.391373	-1.07152	0.0487	0.443183	no	9.96359	10.8799	6.68605	3.44344	11.7389	9.35909
ENSMUSG00000043372	Hexim2	11:103132428-103139876	OK	5.40262	4.11929	-0.391265	-0.850079	0.10935	0.67747	no	4.66893	5.33503	6.20391	3.92561	4.65873	3.9672
ENSMUSG00000021384	Susd3	13:49230689-49248706	OK	0.846992	0.645902	-0.391032	-0.373993	0.42555	0.999642	no	0.882987	1.11174	0.546252	0.550788	1.09036	0.391676
ENSMUSG00000021209	Ppp4r4	12:103532282-103613831	OK	2.3809	1.81588	-0.390837	-0.514496	0.24175	0.928507	no	1.72524	3.88703	1.53042	1.92461	1.78785	1.62645
ENSMUSG00000083754	Gm7803	X:50325517-50326532	OK	0.640632	0.48869	-0.390577	-0.701623	0.1948	0.869316	no	0.66475	0.699954	0.557191	0.478319	0.356101	0.642019
ENSMUSG00000045826	Ptprcap	19:4154605-4163354	OK	0.255372	0.19482	-0.390457	-0.155722	0.83335	0.999642	no	0.129653	0.428172	0.208292	0.20116	0.23296	0.144002
ENSMUSG00000034684	Sema3f	9:107681499-107710475	OK	36.4793	27.8384	-0.389999	-1.43946	0.00505	0.0951093	no	34.5412	38.0236	36.873	24.6033	30.4494	31.6976
ENSMUSG00000066175	2510046G10Rik	7:126648542-126676432	OK	7.77126	5.93117	-0.389831	-0.444253	0.41705	0.999642	no	6.49486	7.88475	8.93416	6.21205	6.0851	5.21549
ENSMUSG00000105345	BC030343	5:143270074-143272513	OK	0.751966	0.574032	-0.389537	-0.990449	0.06655	0.528973	no	0.671951	0.855274	0.728674	0.608152	0.4851	0.594723
ENSMUSG00000054247	Gm9939	8:34826459-34979874	OK	0.650634	0.496697	-0.389481	-0.127406	0.7299	0.999642	no	0.543908	0.867706	0.540289	0.385676	0.597301	0.618137
ENSMUSG00000067276	Capn6	X:143802230-143827414	OK	87.7089	66.9965	-0.388638	-2.37057	5e-05	0.002075	yes	82.2356	89.262	91.6292	59.1016	72.9315	76.8512
ENSMUSG00000098238	Gm8756	13:97434969-97497007	OK	0.901781	0.688829	-0.388631	-0.636887	0.24025	0.927057	no	0.937393	0.853987	0.913962	0.501512	0.962462	0.78983
ENSMUSG00000051811	Cox6b2	7:4751791-4753094	OK	37.6977	28.7957	-0.388623	-1.52751	0.0052	0.0968302	no	36.0416	41.1354	35.9163	27.0303	28.3754	32.7469
ENSMUSG00000108461	AV356131	7:116443574-116444324	OK	3.08362	2.356	-0.388287	-0.988702	0.0659	0.525831	no	3.2599	3.06917	2.92179	1.95214	2.99476	2.52496
ENSMUSG00000073988	Ttpa	4:20007937-20030785	OK	5.21805	3.98887	-0.387532	-1.26565	0.0232	0.274888	no	5.19789	5.02697	5.42931	3.46501	3.8015	5.22395
ENSMUSG00000024232	Bambi	18:3507956-3516404	OK	7.57227	5.78919	-0.387364	-2.09693	0.00015	0.00546921	yes	7.4023	7.37916	7.93535	5.76877	5.92073	5.69848
ENSMUSG00000097162	2310010J17Rik	7:90124821-90129984	OK	17.3242	13.2483	-0.386984	-0.858972	0.11225	0.684703	no	14.9341	17.5172	19.5214	13.4569	13.1403	12.9392
ENSMUSG00000028019	Pdgfc	3:81036415-81214040	OK	36.7456	28.1005	-0.386977	-2.31194	5e-05	0.002075	yes	34.4398	36.2172	39.5797	24.6081	30.9125	32.2733
ENSMUSG00000028610	Dmrtb1	4:107676289-107684230	OK	1.34083	1.02551	-0.386778	-0.88565	0.0915	0.627879	no	1.26114	1.4022	1.35914	0.820791	1.34717	1.1133
ENSMUSG00000024899	Papss2	19:32620004-32667187	OK	1.39012	1.06322	-0.386773	-1.30163	0.015	0.206291	no	1.47078	1.15217	1.54741	0.997691	1.01143	1.24607
ENSMUSG00000047281	Sfn	4:133600555-133602168	OK	16.5751	12.6806	-0.386398	-1.90043	0.0006	0.0183863	yes	14.4838	14.8078	20.4337	9.78087	15.3326	15.8279
ENSMUSG00000029001	Fbxo44	4:148152799-148160482	OK	5.32365	4.07284	-0.38638	-1.21926	0.02125	0.25903	no	6.5608	2.93972	6.47043	3.72726	5.46409	3.37276
ENSMUSG00000084328	Gm14046	2:129749900-129750409	OK	3.72512	2.85022	-0.386216	-0.876914	0.1041	0.666184	no	2.83529	4.30212	4.03796	2.85341	3.22583	2.4682
ENSMUSG00000085749	Gm12843	4:117271462-117500602	OK	0.4695	0.359242	-0.386171	-0.0772192	0.7345	0.999642	no	0.449604	0.381246	0.577652	0.350567	0.408548	0.327287
ENSMUSG00000070713	Gm10282	8:72304109-72305260	OK	1.22286	0.935788	-0.38601	-0.884217	0.10555	0.66924	no	1.2874	0.981136	1.40006	0.819459	1.16931	0.934925
ENSMUSG00000039578	Ccser1	6:61172292-62382865	OK	3.40473	2.60603	-0.385687	-0.828711	0.1122	0.684703	no	2.95057	3.47017	3.79345	2.01576	2.91163	3.48097
ENSMUSG00000026471	Mr1	1:155127276-155146814	OK	0.856973	0.656151	-0.385224	-0.987122	0.0651	0.523132	no	0.905576	0.658724	1.00662	0.537513	0.848063	0.701514
ENSMUSG00000080746	Rpsa-ps12	4:149142496-149143388	OK	0.898094	0.687773	-0.384935	-0.731916	0.17985	0.844155	no	0.987701	0.787342	0.91924	0.669342	0.769329	0.643078
ENSMUSG00000071637	Cebpd	16:15887285-16146851	OK	0.495971	0.379859	-0.384791	-0.380987	0.4423	0.999642	no	0.523498	0.547099	0.417317	0.335854	0.523891	0.323838
ENSMUSG00000029207	Apbb2	5:66298702-66618784	OK	5.60826	4.29549	-0.384732	-0.618437	0.174	0.831104	no	7.12355	5.29535	4.40588	3.44929	5.35418	4.9292
ENSMUSG00000059883	Irak4	15:94543642-94589889	OK	1.5406	1.18032	-0.384317	-0.414873	0.4478	0.999642	no	1.429	1.40532	1.78747	1.07719	1.34704	1.21985
ENSMUSG00000100393	Gm29491	1:186622791-186707033	OK	0.372609	0.285484	-0.384253	-0.125446	0.86255	0.999642	no	0.464328	0.255579	0.39792	0.240139	0.317827	0.343831
ENSMUSG00000029695	Aass	6:23072172-23132986	OK	3.16018	2.4213	-0.384226	-1.00429	0.0573	0.488951	no	3.0372	3.25462	3.18873	2.30904	2.77528	2.29185
ENSMUSG00000066406	Akap13	7:75455533-75754609	OK	5.15761	3.95219	-0.38405	-0.951079	0.06215	0.511221	no	4.09321	5.98504	5.39457	4.05573	3.89969	3.79761
ENSMUSG00000086067	Gm16183	8:84388439-84640246	OK	0.85129	0.652443	-0.383798	-0.415519	0.4288	0.999642	no	0.734943	0.782943	1.03598	0.686621	0.657233	0.579299
ENSMUSG00000052551	Adarb2	13:8202865-8768747	OK	0.309418	0.237193	-0.383497	-0.515393	0.3462	0.999642	no	0.229856	0.362431	0.335968	0.15511	0.309721	0.328831
ENSMUSG00000032528	Vipr1	9:121642715-121672954	OK	0.316015	0.242261	-0.383431	-0.26856	0.54575	0.999642	no	0.11492	0.110005	0.723121	0.337792	0.153904	0.139557
ENSMUSG00000086015	4833417C18Rik	11:95858161-95861044	OK	0.529056	0.405658	-0.383157	-0.68569	0.1996	0.876412	no	0.528438	0.605953	0.452778	0.341618	0.474749	0.464648
ENSMUSG00000026970	Rbms1	2:60750192-60963192	OK	76.6574	58.7852	-0.382972	-0.511476	0.32855	0.999642	no	85.6005	64.7779	79.5938	60.7092	56.0041	57.7183
ENSMUSG00000027695	Pld1	3:27938694-28133362	OK	1.00802	0.773061	-0.382864	-0.698726	0.13015	0.727721	no	0.750407	1.27059	1.00305	0.689676	0.820368	0.892526
ENSMUSG00000039831	Arhgap29	3:121952540-122016753	OK	42.8447	32.8611	-0.382736	-1.7428	0.001	0.0277131	yes	41.2363	38.2145	49.0832	34.659	30.604	31.5222
ENSMUSG00000073125	Xlr3b	X:73107634-73292976	OK	1.52102	1.16667	-0.382641	-0.579271	0.29995	0.977543	no	2.4101	0.855126	1.29783	1.12299	0.752198	1.66851
ENSMUSG00000019256	Ahr	12:35497973-35535038	OK	1.06993	0.820713	-0.382561	-1.16881	0.0197	0.246504	no	1.04958	0.996832	1.16336	0.686076	0.875153	1.03555
ENSMUSG00000064168	Hist1h2bh	13:23542969-23543357	OK	1.17912	0.904696	-0.382208	-0.47646	0.3703	0.999642	no	0.379604	2.50725	0.650507	1.04705	0.259837	1.26485
ENSMUSG00000030798	Cd37	7:45215752-45239115	OK	0.260673	0.200009	-0.382176	-0.0390899	0.66685	0.999642	no	0.262526	0.382746	0.136747	0.131053	0.267315	0.270615
ENSMUSG00000034903	Cobll1	2:65088338-65239675	OK	1.97601	1.51639	-0.381952	-0.615168	0.18255	0.850784	no	1.66632	1.82522	2.43648	1.36547	1.75758	1.57703
ENSMUSG00000029838	Ptn	6:36714928-36810220	OK	157.605	120.948	-0.381931	-2.33997	5e-05	0.002075	yes	161.471	141.789	169.555	115.429	117.133	135.8
ENSMUSG00000021469	Msx2	13:53466883-53473074	OK	17.1678	13.1788	-0.381487	-2.0539	0.0001	0.00392328	yes	19.2066	14.5414	17.7554	10.9196	14.9486	15.9273
ENSMUSG00000078480	Mrpl48-ps	4:88599174-88599810	OK	1.68763	1.29554	-0.381442	-0.701575	0.2769	0.959431	no	0	0.119275	4.9436	0	5.06182	0.120343
ENSMUSG00000034968	Lbx2	6:83086366-83088243	OK	0.293581	0.225374	-0.381441	-0.334864	0.5005	0.999642	no	0.114649	0.471395	0.2947	0.221705	0.220049	0.238037
ENSMUSG00000045106	Ccdc73	2:104867804-105017904	OK	2.5469	1.95545	-0.381242	-0.110954	0.87475	0.999642	no	0.199594	4.61228	2.82881	1.65751	4.50677	0
ENSMUSG00000046287	Pnma3	X:73064786-73068191	OK	0.33719	0.258894	-0.381204	-0.848196	0.1221	0.708867	no	0.256626	0.387427	0.367518	0.1896	0.338771	0.317603
ENSMUSG00000059658	Gm16379	9:14845364-14847835	OK	2.08651	1.60235	-0.380901	-0.491076	0.3751	0.999642	no	1.60541	4.24144	0.412666	1.66055	1.48351	1.60478
ENSMUSG00000101122	Gm17971	1:55051318-55072702	OK	0.414278	0.318174	-0.380784	-0.183704	0.7906	0.999642	no	0.350215	0.642542	0.250078	0.322	0.23972	0.388975
ENSMUSG00000101037	Gm28424	9:95512150-95513469	OK	0.733617	0.564056	-0.379189	-0.784009	0.14415	0.762669	no	0.757157	0.740883	0.702811	0.522109	0.604649	0.607357
ENSMUSG00000007379	Dennd2c	3:103102603-103169769	OK	1.11477	0.857212	-0.379025	-1.24057	0.0195	0.244929	no	1.1124	1.34737	0.884542	0.853539	0.949719	0.772051
ENSMUSG00000021280	Exoc3l4	12:111417429-111431182	OK	0.955554	0.734985	-0.378622	-1.08415	0.0431	0.409599	no	0.768466	1.05505	1.04314	0.651964	0.868805	0.767206
ENSMUSG00000049001	Ndnf	6:65671589-65712326	OK	5.97665	4.59752	-0.378483	-0.65295	0.22485	0.905355	no	6.75882	6.06387	5.10727	5.39543	3.79402	3.80518
ENSMUSG00000087594	BC039771	2:145675366-145753672	OK	0.356248	0.274109	-0.378136	-0.766634	0.16075	0.800455	no	0.249603	0.42381	0.395333	0.207713	0.336694	0.344314
ENSMUSG00000030825	Hsd17b14	7:45554892-45567752	OK	0.770241	0.592686	-0.378042	-0.287066	0.4951	0.999642	no	0.688198	0.872783	0.749742	0.328151	1.10141	0.61303
ENSMUSG00000036528	Ppfibp2	7:107595206-107758032	OK	16.9714	13.0599	-0.377961	-2.14649	5e-05	0.002075	yes	16.2879	17.1421	17.4842	13.1497	13.0765	12.8637
ENSMUSG00000097275	Gm26648	5:24685531-24710378	OK	0.299643	0.230588	-0.377926	-0.359577	0.50465	0.999642	no	0.279511	0.335246	0.284172	0.22007	0.222735	0.259477
ENSMUSG00000068874	Selenbp1	3:94933055-94944758	OK	2.16477	1.66605	-0.377787	-0.647748	0.22425	0.904042	no	1.16229	2.64203	2.68999	1.27753	1.90342	2.2057
ENSMUSG00000019947	Arid5b	10:68095592-68278726	OK	3.29362	2.5353	-0.377519	-1.66849	0.00175	0.042507	yes	3.19538	2.9092	3.77629	2.50149	2.41568	2.72254
ENSMUSG00000064208	Gm10145	10:27936363-27936828	OK	1.49186	1.14862	-0.377212	-0.61661	0.2488	0.93511	no	1.70008	1.28049	1.495	1.20317	1.19432	0.993811
ENSMUSG00000096221	1500002C15Rik	4:155704799-155734727	OK	1.59377	1.22719	-0.377088	-0.405369	0.457	0.999642	no	1.46109	1.53604	1.78417	1.1124	1.46161	1.22235
ENSMUSG00000074039	4930520O04Rik	9:114368302-114390675	OK	1.12826	0.868794	-0.377009	-0.26724	0.5976	0.999642	no	0.936395	1.08596	1.36242	0.942351	0.92246	0.668013
ENSMUSG00000071419	Rps15-ps2	6:58017505-58017943	OK	3.62224	2.7894	-0.376926	-0.784603	0.14485	0.764373	no	3.69039	3.07429	4.10206	2.78548	3.48186	2.1048
ENSMUSG00000073758	Sh3d21	4:126150601-126163491	OK	1.47089	1.133	-0.376542	-1.06129	0.04745	0.434441	no	1.46972	1.50632	1.43663	0.974351	1.34345	1.23985
ENSMUSG00000098713	Rps2-ps5	14:69158670-69159519	OK	0.596768	0.459738	-0.376356	-0.618771	0.253	0.935273	no	0.690161	0.399865	0.700277	0.413291	0.447548	0.564823
ENSMUSG00000009633	G0s2	1:193203037-193343878	OK	5.6798	4.37729	-0.375804	-1.09578	0.04025	0.395249	no	5.62059	5.14316	6.27565	4.21489	4.43638	4.64298
ENSMUSG00000040345	Arhgap9	10:127323726-127341589	OK	0.983054	0.757822	-0.375412	-0.343023	0.5239	0.999642	no	0.934311	1.07672	0.938131	0.649302	1.01925	0.71343
ENSMUSG00000082292	Gm12250	11:58187738-58189012	OK	1.34142	1.03415	-0.375314	-0.912474	0.09025	0.622145	no	1.49025	1.351	1.18299	1.02007	0.85506	1.24139
ENSMUSG00000006235	Epor	9:21958898-21963576	OK	2.82789	2.18014	-0.375305	-1.25434	0.01915	0.242376	no	2.46873	2.97191	3.04301	2.10554	2.50511	2.00436
ENSMUSG00000032358	Fam83b	9:76490053-76567116	OK	0.670071	0.516674	-0.37506	-1.02693	0.05845	0.494073	no	0.568445	0.67456	0.767208	0.579222	0.447156	0.461096
ENSMUSG00000047730	Fcgbp	7:28071235-28120862	OK	0.529234	0.408135	-0.374859	-0.509907	0.3373	0.999642	no	0.482691	0.567137	0.537875	0.369545	0.429157	0.464294
ENSMUSG00000025920	Stau2	1:16228505-16520112	OK	22.9488	17.7045	-0.374301	-1.28087	0.0156	0.210683	no	23.1283	23.5361	22.1819	17.4607	17.5606	18.3359
ENSMUSG00000047146	Tet1	10:62804569-62899118	OK	3.49167	2.6939	-0.37422	-0.893922	0.0762	0.56617	no	2.81145	3.30623	4.35733	2.53855	2.7535	2.94501
ENSMUSG00000027243	Harbi1	2:91710851-91721545	OK	11.6484	8.98763	-0.374116	-1.01946	0.0598	0.501125	no	10.528	12.9466	11.4705	9.65653	9.19462	7.44283
ENSMUSG00000083307	AA414768	X:12936871-12938128	OK	0.831513	0.641634	-0.373988	-0.786462	0.1476	0.771002	no	0.712603	0.980559	0.801378	0.575843	0.845982	0.56887
ENSMUSG00000087440	4930577N17Rik	3:51252719-51340663	OK	0.766851	0.591763	-0.373927	-0.185509	0.7865	0.999642	no	0.858407	0.763231	0.678915	0.443948	0.745764	0.733392
ENSMUSG00000106791	4930553P18Rik	6:86004379-86009355	OK	0.292806	0.226034	-0.373403	-0.614768	0.24185	0.928507	no	0.209589	0.212972	0.455857	0.16676	0.2483	0.322318
ENSMUSG00000099136	Gm27608	10:92071036-92165170	OK	1.29648	1.001	-0.373162	-0.072958	0.8542	0.999642	no	0	3.88945	0	0.211707	0	3.58059
ENSMUSG00000053964	Lgals4	7:28833853-28841708	OK	0.78028	0.602525	-0.37297	-0.313349	0.3626	0.999642	no	1.17963	0.659029	0.50218	0.655081	0.598994	0.500944
ENSMUSG00000064090	Vrk2	11:26386134-26593999	OK	18.8079	14.5265	-0.372655	-0.59398	0.2647	0.949208	no	17.8887	23.0489	15.4863	12.6549	18.2494	14.5468
ENSMUSG00000034450	Gulo	14:65986786-66009210	OK	0.971437	0.750328	-0.372598	-0.984099	0.06805	0.534604	no	1.08158	0.676774	1.15596	0.494595	1.06374	0.94838
ENSMUSG00000025269	Apex2	X:150519518-150643878	OK	17.653	13.6364	-0.372457	-0.767605	0.1319	0.733039	no	17.18	16.9009	18.8782	13.7094	13.9798	13.1468
ENSMUSG00000107462	Gm7384	6:141138046-141138576	OK	1.31376	1.01523	-0.371903	-0.624262	0.24585	0.931559	no	1.50601	0.868393	1.56689	1.26102	0.662692	0.876168
ENSMUSG00000085875	Gm12905	4:123898632-123917269	OK	0.594905	0.459807	-0.371632	-0.150871	0.7763	0.999642	no	0.412468	0.510808	0.86144	0.566847	0.476472	0.229061
ENSMUSG00000027412	Lpin3	2:160731299-160906002	OK	0.712623	0.55084	-0.371507	-0.139321	0.734	0.999642	no	0.584782	1.05252	0.500565	0.360954	0.830043	0.651409
ENSMUSG00000055538	Zcchc24	14:25711641-25769039	OK	15.2916	11.8256	-0.370828	-2.13383	5e-05	0.002075	yes	14.5451	14.9096	16.42	11.0692	12.6263	12.5375
ENSMUSG00000021950	Anxa8	14:34051131-34102754	OK	2.37665	1.83808	-0.370734	-1.12337	0.0369	0.370728	no	2.02976	2.43755	2.66264	1.43013	2.51671	1.97533
ENSMUSG00000061983	Rps12	10:23785210-23787195	OK	4.11606	3.18364	-0.370587	-0.834314	0.11255	0.685721	no	2.57635	5.57765	4.19419	3.37546	2.64524	3.3384
ENSMUSG00000020940	1700023F06Rik	11:103198943-103218432	OK	0.354422	0.274143	-0.370542	-0.442915	0.2868	0.968727	no	0.457205	0.27961	0.326452	0.262726	0.260794	0.310325
ENSMUSG00000033491	Prss35	9:86743648-86758443	OK	1.59529	1.23456	-0.369819	-1.27017	0.01675	0.220446	no	1.5301	1.5301	1.72566	1.06413	1.47267	1.33733
ENSMUSG00000074796	Slc4a11	2:130684112-130697519	OK	0.458487	0.354819	-0.369799	-0.38651	0.4154	0.999642	no	0.431597	0.643311	0.300553	0.289813	0.493781	0.345867
ENSMUSG00000007888	Crlf1	8:70493157-70504081	OK	73.2177	56.6642	-0.369757	-1.23335	0.0203	0.250594	no	76.7801	71.9718	70.9013	46.3752	66.2097	67.6965
ENSMUSG00000106205	C230096K16Rik	5:64708206-64832901	OK	0.745425	0.577013	-0.369459	-0.216391	0.67155	0.999642	no	0.633618	0.629436	0.973222	0.559464	0.571215	0.617911
ENSMUSG00000073733	Rsg1	4:141213955-141226756	OK	2.05139	1.58794	-0.369449	-0.789397	0.10575	0.669993	no	1.64314	2.31252	2.19851	1.48119	1.68596	1.70341
ENSMUSG00000026853	Crat	2:30392253-30415813	OK	27.4438	21.2453	-0.369338	-0.470026	0.37745	0.999642	no	23.7232	26.0006	32.6075	21.4319	20.7776	21.3396
ENSMUSG00000107620	Gm44256	7:3332954-3368221	OK	1.92563	1.49099	-0.369064	-0.140959	0.85535	0.999642	no	2.45795	1.73942	1.57952	1.27119	1.08158	2.33999
ENSMUSG00000038637	Lrrc56	7:141194156-141214080	OK	14.644	11.3404	-0.368848	-0.965061	0.077	0.569042	no	12.927	15.8625	15.1427	10.5945	13.4866	10.6859
ENSMUSG00000105510	Gm43815	5:72513300-72559684	OK	0.321621	0.249087	-0.36871	-0.149192	0.80285	0.999642	no	0.417477	0.164131	0.383254	0.277597	0.275556	0.165601
ENSMUSG00000021265	Slc25a29	12:108825872-108835883	OK	4.16804	3.22911	-0.368234	-1.26323	0.0154	0.209351	no	3.76026	4.30277	4.44109	2.75272	4.20515	3.20585
ENSMUSG00000093751	Gm3307	7:63444750-63759028	OK	0.572579	0.44386	-0.36737	-0.203084	0.70725	0.999642	no	0.382761	0.421378	0.913598	0.509026	0.392997	0.364392
ENSMUSG00000021250	Fos	12:85473889-85477273	OK	0.624936	0.484454	-0.367349	-0.572843	0.2404	0.927057	no	0.542217	0.847166	0.485425	0.42219	0.554225	0.53921
ENSMUSG00000035910	Dcdc2a	13:25056003-25210706	OK	1.36452	1.05799	-0.367076	-0.568391	0.2921	0.969188	no	1.30364	1.47499	1.31494	0.912916	1.15592	1.2502
ENSMUSG00000078794	Dact3	7:16875316-16887462	OK	34.954	27.1143	-0.366403	-2.19185	5e-05	0.002075	yes	38.0218	32.4211	34.4191	24.9111	32.0823	26.5528
ENSMUSG00000029671	Wnt16	6:22288226-22298522	OK	0.55563	0.431015	-0.366387	-0.296074	0.41665	0.999642	no	0.597108	0.595244	0.474538	0.507821	0.386989	0.321428
ENSMUSG00000108204	Gm44180	6:115769919-115770327	OK	2.98421	2.31587	-0.365795	-0.685611	0.2033	0.882035	no	2.7428	1.50966	4.70018	2.48238	1.76009	2.53863
ENSMUSG00000044646	Zbtb7c	18:75820177-76148561	OK	0.425024	0.329859	-0.365697	-0.800025	0.1351	0.741591	no	0.483049	0.388491	0.403534	0.211366	0.360331	0.536372
ENSMUSG00000107690	Gm44044	6:100228564-100287485	OK	0.960229	0.74557	-0.365035	-0.194513	0.7487	0.999642	no	1.03309	0.758161	1.08944	0.821977	0.543956	0.79437
ENSMUSG00000047216	Cdh19	1:110888325-110977584	OK	0.597786	0.464188	-0.36492	-0.724953	0.15975	0.799331	no	0.657967	0.369116	0.766276	0.456729	0.503334	0.439961
ENSMUSG00000024430	Cabyr	18:12741323-12755146	OK	0.367313	0.285249	-0.364792	-0.452825	0.325	0.998299	no	0.383171	0.328122	0.390647	0.25716	0.288998	0.337675
ENSMUSG00000079017	Ifi27l2a	12:103442166-103443680	OK	0.726491	0.56422	-0.364687	-0.443933	0.3984	0.999642	no	0.540991	0.595534	1.04295	0.839359	0.277729	0.300433
ENSMUSG00000063450	Syne2	12:75818133-76110926	OK	30.919	24.0132	-0.364665	-0.973093	0.0691	0.539124	no	27.1523	35.2932	30.3116	21.4757	29.0743	24.0272
ENSMUSG00000075276	Gm13653	2:75138841-75322897	OK	0.652393	0.506801	-0.364321	-0.326272	0.5321	0.999642	no	0.251203	0.737412	0.968564	0.519663	0.429869	0.558011
ENSMUSG00000026818	Cel	2:28555794-28583751	OK	0.448944	0.348758	-0.364309	-0.205447	0.6837	0.999642	no	0.631059	0.375128	0.340644	0.248039	0.492431	0.406523
ENSMUSG00000085433	Gm16001	5:124111108-124112264	OK	4.02546	3.12793	-0.363947	-1.0665	0.04665	0.430698	no	3.92072	4.04441	4.11125	2.74265	3.34662	3.67979
ENSMUSG00000059900	Tmem40	6:115729130-115762410	OK	0.569555	0.442712	-0.363467	-0.500969	0.27415	0.956716	no	0.529162	0.665452	0.51405	0.332594	0.436883	0.668776
ENSMUSG00000089774	Slc5a3	16:92058269-92112227	OK	2.17298	1.68913	-0.363391	-0.855868	0.06815	0.534743	no	1.71839	2.32792	2.47261	1.46818	1.85613	1.96402
ENSMUSG00000070942	Il1rl2	1:40324609-40367562	OK	1.78332	1.38632	-0.363305	-0.89202	0.09145	0.627797	no	1.47725	1.8948	1.97791	0.911602	1.78433	1.93775
ENSMUSG00000027955	Fam198b	3:79859292-79946280	OK	1.55602	1.20992	-0.362941	-0.382098	0.4446	0.999642	no	1.45219	2.04452	1.17134	0.946622	0.811027	2.13542
ENSMUSG00000037221	Mospd3	5:137596644-137601058	OK	14.709	11.4383	-0.362827	-0.958463	0.0739	0.557609	no	19.6851	11.6335	12.8084	11.059	9.63434	14.0009
ENSMUSG00000086629	2810403D21Rik	X:108737015-108974906	OK	3.67258	2.85637	-0.36261	-0.311692	0.62545	0.999642	no	2.75628	3.74095	4.52052	2.47782	3.1239	3.34595
ENSMUSG00000074576	Mocs3	2:168230621-168232594	OK	3.93058	3.05716	-0.362552	-1.34589	0.0128	0.185943	no	4.32367	3.85438	3.6137	2.63392	3.86736	3.09344
ENSMUSG00000022701	Ccdc191	16:43861406-43964314	OK	11.6072	9.02948	-0.362299	-0.216682	0.63195	0.999642	no	8.66238	16.7886	9.37045	8.66898	10.9117	7.86832
ENSMUSG00000042834	Nrep	18:33437018-33464029	OK	298.482	232.212	-0.362201	-2.11159	5e-05	0.002075	yes	295.018	260.905	339.522	220.919	224.417	262.592
ENSMUSG00000025856	Pdgfa	5:138976013-139000577	OK	38.1738	29.7038	-0.361934	-1.15499	0.03185	0.335716	no	36.3555	35.9313	42.2344	31.2649	27.5634	28.7219
ENSMUSG00000028864	Hgf	5:16553494-16620152	OK	1.98091	1.54158	-0.361753	-1.06114	0.04965	0.449599	no	2.18111	2.10238	1.65924	1.4648	1.41671	1.82002
ENSMUSG00000029869	Ephb6	6:41605481-41620509	OK	7.0017	5.44913	-0.361679	-0.784329	0.1384	0.750477	no	6.08244	6.79647	8.1262	5.17297	4.34666	7.10394
ENSMUSG00000049124	Gm8186	17:26098871-26099257	OK	6.70116	5.21677	-0.361254	-0.842902	0.11845	0.699978	no	5.24398	7.46223	7.39727	4.89491	5.25289	5.82436
ENSMUSG00000029755	Dlx5	6:6877804-6882085	OK	25.7787	20.0694	-0.361187	-1.90588	0.0008	0.0233044	yes	27.1146	26.1292	24.0924	18.2979	22.4851	21.1966
ENSMUSG00000038115	Ano2	6:125690418-126040126	OK	0.254653	0.198266	-0.36109	-0.446455	0.2518	0.93511	no	0.253641	0.279223	0.231094	0.173874	0.163967	0.28135
ENSMUSG00000030220	Arhgdib	6:136923654-136968865	OK	17.7564	13.8321	-0.360318	-1.44927	0.0089	0.143978	no	16.3752	18.6663	18.2278	10.5933	18.8917	15.2501
ENSMUSG00000053399	Adamts18	8:113697125-113848738	OK	2.0507	1.59782	-0.360009	-1.16812	0.02195	0.264248	no	2.02174	1.99903	2.13132	1.23042	1.86881	2.06164
ENSMUSG00000070644	Etnk2	1:133363571-133380336	OK	1.65278	1.28796	-0.359812	-0.61487	0.2229	0.902123	no	1.65623	1.17049	2.13162	1.39841	1.22044	1.13457
ENSMUSG00000110424	RP23-336M16.3	7:111083063-111122684	OK	1.88992	1.47289	-0.359672	-0.616584	0.25615	0.939975	no	2.0627	2.04106	1.566	1.22391	1.88061	1.56314
ENSMUSG00000032083	Apoa1	9:46228579-46230466	OK	0.407169	0.317365	-0.359484	-0.512849	0.29155	0.969188	no	0.310286	0.403672	0.50755	0.35012	0.318584	0.250638
ENSMUSG00000097882	0610038B21Rik	8:77250365-77523898	OK	0.406067	0.316534	-0.359358	-0.264885	0.68625	0.999642	no	0.304238	0.545784	0.368179	0.361754	0.279327	0.2633
ENSMUSG00000034612	Chst11	10:82985497-83195900	OK	4.71813	3.67881	-0.358974	-1.81269	0.00065	0.0196271	yes	4.53789	4.78179	4.8347	3.46672	3.78988	3.99193
ENSMUSG00000059395	Nkapl	13:21467046-21468509	OK	0.889397	0.693693	-0.35853	-0.814349	0.1296	0.726401	no	0.7638	1.06639	0.838003	0.693689	0.745971	0.641423
ENSMUSG00000052914	Cyp2j6	4:96516137-96553661	OK	2.8973	2.26034	-0.35817	-1.45248	0.00595	0.106475	no	2.71216	2.95521	3.02454	2.13432	2.2816	2.49111
ENSMUSG00000038521	C1s1	6:124530344-124542359	OK	0.743007	0.579676	-0.358129	-0.425246	0.4039	0.999642	no	0.968644	0.635264	0.625112	0.330609	1.05564	0.601843
ENSMUSG00000034248	Slc25a37	14:69241847-69305355	OK	19.8262	15.469	-0.358026	-2.02375	0.0002	0.00702851	yes	18.1703	22.0851	19.2231	15.2055	16.0112	15.4538
ENSMUSG00000038481	Cdk19	10:40348507-40483818	OK	9.10253	7.10233	-0.357974	-2.03695	0.0002	0.00702851	yes	8.91143	8.8339	9.56225	6.30102	7.91516	7.89212
ENSMUSG00000046636	Gm7729	18:27598643-27599756	OK	0.355616	0.277476	-0.35796	-0.458633	0.3991	0.999642	no	0.274665	0.388745	0.403439	0.162342	0.523734	0.261483
ENSMUSG00000047246	Hist1h2be	13:23583741-23621124	OK	0.556936	0.43457	-0.357922	-0.774146	0.1454	0.766052	no	0.441403	0.843485	0.385919	0.437688	0.466136	0.396768
ENSMUSG00000053173	Rpl18-ps2	6:128313356-128313923	OK	1.75029	1.36583	-0.357819	-0.685593	0.20595	0.885591	no	1.86856	1.56045	1.82186	1.59951	1.19082	1.07347
ENSMUSG00000074194	Zfp791	8:85108552-85123095	OK	2.07279	1.61767	-0.357662	-0.976797	0.06775	0.533517	no	2.02199	1.97948	2.21692	1.70152	1.73349	1.33414
ENSMUSG00000034159	2310007B03Rik	1:93151348-93160948	OK	0.414671	0.323698	-0.357319	-0.725125	0.1727	0.828247	no	0.477063	0.331319	0.435632	0.285514	0.347672	0.376093
ENSMUSG00000104649	Gm43712	3:90104131-90212048	OK	8.79418	6.86502	-0.357284	-0.478088	0.375	0.999642	no	7.80482	6.92879	11.6489	7.55207	6.20403	6.15193
ENSMUSG00000059483	Gm5528	1:71958997-72038731	OK	0.294643	0.230013	-0.357253	-0.255297	0.651	0.999642	no	0.16928	0.27952	0.435128	0.0875471	0.0869035	0.658053
ENSMUSG00000026765	Lypd6b	2:49787687-49948849	OK	1.60685	1.25463	-0.35697	-0.791073	0.10495	0.668	no	1.80937	1.51922	1.49195	1.18476	1.43794	1.21106
ENSMUSG00000096726	Gm5558	5:91806578-91807073	OK	2.81003	2.19442	-0.356749	-0.740654	0.17435	0.831807	no	2.32865	3.00539	3.09606	1.91029	2.63826	2.31882
ENSMUSG00000032507	Fbxl2	9:113930933-114046191	OK	2.59464	2.02674	-0.356374	-0.362076	0.43515	0.999642	no	2.35064	2.74532	2.68797	1.88562	2.2882	2.04754
ENSMUSG00000100954	Gm10138	1:151339603-151364422	OK	2.46813	1.928	-0.356311	-0.166599	0.7718	0.999642	no	2.88542	2.21821	2.30075	1.7175	2.53869	1.73831
ENSMUSG00000093908	Gm5784	12:19387808-19390286	OK	0.306922	0.239816	-0.355942	-0.689064	0.20555	0.884824	no	0.257982	0.477106	0.185677	0.224148	0.339048	0.171921
ENSMUSG00000048163	Selplg	5:113818535-113832644	OK	0.303635	0.237341	-0.355376	-0.22921	0.445	0.999642	no	0.379499	0.298953	0.232455	0.235167	0.258075	0.220956
ENSMUSG00000068099	1500009C09Rik	15:82252396-82260753	OK	1.06051	0.829039	-0.355244	-0.846427	0.11115	0.682985	no	0.626421	1.03437	1.52074	0.539948	1.25062	0.985647
ENSMUSG00000024053	Emilin2	17:70853766-71475343	OK	9.10354	7.11707	-0.355145	-0.437116	0.4108	0.999642	no	8.37279	9.93505	9.00277	6.59027	7.6343	7.65342
ENSMUSG00000040663	Clcf1	19:4214237-4223490	OK	2.64429	2.0675	-0.354992	-0.643638	0.2186	0.897699	no	2.52652	2.24154	3.16479	1.87982	2.13707	2.37328
ENSMUSG00000015968	Cacna1d	14:30009022-30527056	OK	0.884675	0.69187	-0.354648	-0.586567	0.27	0.953719	no	0.792007	0.957583	0.904436	0.592918	0.708075	0.873568
ENSMUSG00000009545	Kcnq1	7:143106361-143427042	OK	0.86199	0.674333	-0.35421	-0.290136	0.45775	0.999642	no	0.933581	1.30004	0.352347	0.403862	1.28934	0.600264
ENSMUSG00000055976	Cldn23	8:35824711-35826559	OK	1.55262	1.21464	-0.354173	-0.248162	0.6197	0.999642	no	1.41327	1.12483	2.11975	0.768244	1.04361	2.27847
ENSMUSG00000037455	Slc18b1	10:23796985-23827968	OK	17.3227	13.5552	-0.35382	-0.410495	0.4366	0.999642	no	16.2652	19.1037	16.5991	13.975	12.8789	13.3919
ENSMUSG00000022548	Apod	16:31296191-31314808	OK	3.42223	2.67807	-0.353743	-0.850295	0.0937	0.63454	no	3.8408	3.55095	2.87492	1.91045	3.61447	3.27691
ENSMUSG00000038893	Fam117a	11:95336010-95384507	OK	18.2102	14.2506	-0.353726	-1.14565	0.0331	0.344278	no	19.6233	16.8297	18.1777	14.0743	14.1648	14.689
ENSMUSG00000108591	Particl	6:72432798-72440610	OK	3.58118	2.80269	-0.353625	-0.204731	0.70385	0.999642	no	3.39042	3.48471	3.86841	2.0576	4.15599	2.93954
ENSMUSG00000074865	Zfp934	13:62517499-62520544	OK	6.28156	4.91623	-0.353571	-1.33957	0.01275	0.185871	no	5.11533	5.71605	8.01331	4.81184	5.15303	4.88821
ENSMUSG00000054034	Tceal5	X:136200947-136203876	OK	11.743	9.19439	-0.352971	-0.716712	0.182	0.848939	no	12.5398	11.8055	10.8836	9.27703	8.54336	9.68013
ENSMUSG00000021702	Thbs4	13:92751589-92794818	OK	0.637319	0.499049	-0.352834	-0.628949	0.1669	0.816071	no	0.666303	0.681468	0.564187	0.421622	0.700219	0.452735
ENSMUSG00000055676	Gm5069	1:180326969-180424802	OK	1.22702	0.961004	-0.352549	-0.297671	0.60985	0.999642	no	1.56238	0.880949	1.23774	0.96045	0.97545	0.947667
ENSMUSG00000027452	Acss1	2:150618104-150668935	OK	5.31701	4.16433	-0.352531	-0.857739	0.08205	0.591643	no	3.98057	5.44276	6.52771	2.84254	5.2052	5.76706
ENSMUSG00000105156	Gm9057	5:22550431-23275597	OK	0.969515	0.75937	-0.352461	-0.136023	0.72345	0.999642	no	0.480851	0.264665	2.16303	0.994739	0.246864	0.801138
ENSMUSG00000064247	Plcxd1	5:110099968-110108197	OK	0.760099	0.595354	-0.352439	-0.279955	0.49055	0.999642	no	0.874739	0.828134	0.577424	0.60115	0.751648	0.427469
ENSMUSG00000050010	Shisa3	5:67607881-67909013	OK	2.20839	1.72997	-0.35225	-0.658407	0.21525	0.89552	no	1.98674	2.13588	2.50253	1.06504	2.56848	2.22129
ENSMUSG00000024134	Six2	17:85684276-85688274	OK	55.7434	43.6754	-0.351981	-2.10482	0.0001	0.00392328	yes	59.5011	48.6315	59.0976	34.8315	51.6367	53.4018
ENSMUSG00000022760	Thap7	16:17527981-17531136	OK	25.0579	19.6344	-0.351879	-1.39037	0.0097	0.153169	no	24.0685	24.3685	26.7366	19.5211	19.9322	19.5631
ENSMUSG00000092390	Gm20541	17:38009646-38012396	OK	0.522058	0.409113	-0.351711	-0.676206	0.2098	0.89219	no	0.624373	0.515491	0.426309	0.403636	0.460769	0.368409
ENSMUSG00000024205	Rpl36-ps2	11:76416733-76622314	OK	2.0456	1.60307	-0.351687	-0.106962	0.8807	0.999642	no	2.53363	2.78908	0.814099	1.31033	2.38461	1.40702
ENSMUSG00000085470	1700012C14Rik	6:30460127-30463313	OK	0.913866	0.71617	-0.351681	-0.433312	0.3947	0.999642	no	0.956355	0.702249	1.083	0.764344	0.867114	0.468879
ENSMUSG00000000876	Pxmp4	2:154585757-154603708	OK	6.22761	4.88079	-0.351564	-0.906353	0.0902	0.62206	no	5.91054	7.23085	5.54144	4.97022	4.71234	4.87037
ENSMUSG00000063652	Slc22a21	11:53949964-53980332	OK	1.136	0.890417	-0.351406	-0.612223	0.25085	0.93511	no	0.97333	1.25773	1.17693	0.811598	1.0527	0.88577
ENSMUSG00000019838	Slc16a10	10:40033534-40142254	OK	1.56144	1.22411	-0.351145	-1.35711	0.0115	0.171431	no	1.51067	1.52855	1.6451	1.19765	1.17492	1.32622
ENSMUSG00000026686	Lmx1a	1:167689236-167848741	OK	1.80099	1.41207	-0.350977	-1.22476	0.02425	0.283065	no	1.50406	1.90564	1.99328	1.54757	1.33535	1.21779
ENSMUSG00000091898	Tnnc1	14:31170929-31216946	OK	1.29582	1.01613	-0.350777	-0.0801897	0.7768	0.999642	no	1.09492	1.3295	1.46302	0.861614	1.12643	1.21486
ENSMUSG00000037509	Arhgef4	1:34678187-34843065	OK	1.23351	0.967575	-0.350326	-0.105945	0.6678	0.999642	no	0.785482	1.0449	1.87015	0.728371	1.54816	0.865396
ENSMUSG00000052560	Cpne8	15:90487481-90679432	OK	1.49803	1.17513	-0.350246	-0.631473	0.221	0.899743	no	1.63065	1.43917	1.42427	0.850853	1.45932	1.5395
ENSMUSG00000041845	Rhod	19:4425458-4477447	OK	19.4132	15.229	-0.350217	-1.68058	0.00455	0.087285	no	16.4558	14.0088	27.775	13.1679	20.9582	13.6219
ENSMUSG00000100618	Gm29595	19:45300453-45311011	OK	1.4317	1.12337	-0.349898	-0.464635	0.3838	0.999642	no	0.891383	0.49115	2.91258	0.90141	1.46716	1.22351
ENSMUSG00000107164	4933425D22Rik	5:149439659-149470979	OK	0.263367	0.206712	-0.34945	-0.432334	0.4242	0.999642	no	0.185567	0.306413	0.298121	0.191941	0.254039	0.188929
ENSMUSG00000097367	Gm26718	5:110259129-110286186	OK	2.31599	1.81845	-0.348917	-0.289748	0.58705	0.999642	no	2.4571	2.92473	1.56614	1.09512	2.95354	2.13004
ENSMUSG00000029449	Rhof	5:123047372-123250131	OK	0.935005	0.734211	-0.34878	-0.187311	0.62075	0.999642	no	0.784477	1.22297	0.797565	0.739251	0.782106	0.676234
ENSMUSG00000065282	Gm24455	9:15313801-15313932	OK	55.2297	43.3714	-0.348699	-0.535879	0.31765	0.99448	no	51.1076	44.2045	70.377	15.1037	82.4597	60.8185
ENSMUSG00000059659	Gm10069	6:128438756-128526720	OK	2.12313	1.66787	-0.348191	-0.464034	0.39585	0.999642	no	2.44863	1.56038	2.36039	2.20865	0.844343	1.40983
ENSMUSG00000087013	2610027K06Rik	11:85353166-85832223	OK	2.62662	2.0636	-0.348046	-0.512278	0.345	0.999642	no	3.14937	2.23924	2.49124	1.91767	2.457	1.96205
ENSMUSG00000028179	Cth	3:157894247-157925077	OK	8.44512	6.6369	-0.347607	-1.32467	0.014	0.198829	no	8.32356	8.66515	8.34664	6.75924	7.06516	5.96396
ENSMUSG00000055891	Ubl4b	3:107553686-107555073	OK	1.00505	0.789924	-0.347477	-0.801969	0.14195	0.758319	no	1.09036	0.982051	0.942734	0.738201	0.956676	0.726619
ENSMUSG00000059277	R74862	7:143021783-143067934	OK	3.02233	2.37553	-0.347414	-0.417801	0.43385	0.999642	no	2.74403	2.96952	3.35345	2.36634	2.67265	2.09679
ENSMUSG00000039745	Htatip2	7:49759114-49773975	OK	2.246	1.76546	-0.347311	-0.989104	0.06805	0.534604	no	1.55235	2.50237	2.68329	1.76023	1.7572	1.7842
ENSMUSG00000097503	3110045C21Rik	1:169969408-170110762	OK	1.18014	0.927687	-0.347245	-0.185595	0.7786	0.999642	no	1.12904	1.30945	1.10193	0.963758	0.71461	1.06862
ENSMUSG00000054889	Dsp	13:38150476-38198577	OK	4.2081	3.3081	-0.347167	-1.07535	0.05125	0.458806	no	3.25526	4.33112	5.03792	2.79174	3.7817	3.86721
ENSMUSG00000016356	Col20a1	2:180983923-181017540	OK	0.507585	0.399027	-0.347164	-0.250795	0.59965	0.999642	no	0.294505	0.564646	0.663605	0.247884	0.577433	0.522905
ENSMUSG00000027420	Bfsp1	2:143826527-143863173	OK	0.737855	0.580183	-0.346831	-0.849008	0.1132	0.687551	no	0.527551	0.714886	0.971129	0.520959	0.677736	0.601077
ENSMUSG00000080870	Gm14111	2:146754706-146755705	OK	0.668114	0.525403	-0.346671	-0.633699	0.2421	0.928507	no	0.619139	0.778927	0.606277	0.579415	0.484341	0.458442
ENSMUSG00000038520	Tbc1d17	7:44812255-44855421	OK	48.446	38.0991	-0.34662	-0.294481	0.4992	0.999642	no	45.6705	45.4838	54.1837	33.7689	41.9379	42.9207
ENSMUSG00000105419	Gm43205	3:36097176-36099144	OK	0.325828	0.256248	-0.346568	-0.641284	0.2421	0.928507	no	0.279307	0.322108	0.376069	0.165086	0.355057	0.339765
ENSMUSG00000025934	Gsta3	1:21240588-21271593	OK	0.367506	0.289092	-0.346239	-0.450129	0.3765	0.999642	no	0.579674	0.26135	0.261495	0.218978	0.279957	0.438456
ENSMUSG00000001014	Icam4	9:21029372-21030531	OK	1.28789	1.01359	-0.345528	-0.724881	0.18015	0.845083	no	0.933336	1.68793	1.2424	0.930915	1.71124	0.481294
ENSMUSG00000021590	Spata9	13:75967738-75998968	OK	0.319914	0.251792	-0.345453	-0.48291	0.3557	0.999642	no	0.331329	0.27355	0.354862	0.228473	0.396888	0.153333
ENSMUSG00000069920	B3gnt9	8:105225144-105255153	OK	0.652807	0.513895	-0.345184	-0.336895	0.50835	0.999642	no	0.630586	0.645452	0.682384	0.436637	0.56793	0.614377
ENSMUSG00000083678	Gm12989	4:135715867-135716598	OK	0.444684	0.350059	-0.345182	-0.46192	0.389	0.999642	no	0.355486	0.635905	0.342662	0.367696	0.319369	0.345476
ENSMUSG00000036334	Igsf10	3:59002470-59351167	OK	2.94515	2.31845	-0.345181	-0.840219	0.1169	0.69655	no	2.75562	2.96754	3.11228	2.23056	2.24918	2.5635
ENSMUSG00000019872	Smpdl3a	10:57794334-57811830	OK	4.20263	3.3084	-0.345159	-0.78352	0.12615	0.718007	no	4.60488	4.03392	3.96908	3.18213	3.6358	3.23352
ENSMUSG00000041000	Trim62	4:128883579-128911328	OK	5.52157	4.34673	-0.345148	-1.64922	0.0027	0.0591458	no	6.43919	5.24856	4.87695	4.28153	4.37728	4.44656
ENSMUSG00000039934	Gsap	5:21186254-21424677	OK	0.539415	0.424926	-0.344185	-0.49705	0.268	0.951511	no	0.445023	0.74093	0.432293	0.325646	0.501778	0.546633
ENSMUSG00000032591	Mst1	9:108049241-108085003	OK	0.266062	0.209611	-0.344045	-0.103578	0.7882	0.999642	no	0.4642	0.128833	0.205152	0.165221	0.128772	0.37923
ENSMUSG00000046491	C1qtnf2	11:43474275-43491525	OK	0.37968	0.299231	-0.343521	-0.419231	0.36085	0.999642	no	0.343856	0.411737	0.383447	0.26493	0.432822	0.234245
ENSMUSG00000032557	Uba5	9:104002543-104263617	OK	43.9894	34.6748	-0.343267	-1.06898	0.04655	0.430496	no	43.0618	44.7095	44.1968	33.2366	34.5681	37.658
ENSMUSG00000086495	Gm13778	2:91035619-91053933	OK	0.560209	0.441619	-0.343163	-0.272913	0.59455	0.999642	no	0.351067	0.697873	0.631685	0.437858	0.578822	0.311938
ENSMUSG00000082691	Dynlt1-ps1	6:135349407-135349749	OK	64.6493	50.9639	-0.343159	-1.36368	0.01195	0.176388	no	58.1751	60.3598	75.4131	48.4153	53.5518	53.4734
ENSMUSG00000081783	Gm15599	17:4994331-5347656	OK	0.960811	0.757464	-0.343076	-0.184101	0.736	0.999642	no	0.596058	0.701406	1.58497	0.786599	0.612002	0.844654
ENSMUSG00000030352	Tspan9	6:127961395-128143594	OK	48.9694	38.6075	-0.342998	-0.802737	0.10355	0.666018	no	46.9687	50.0328	49.9066	38.6407	40.8224	36.3262
ENSMUSG00000023911	Flywch2	17:23771840-23786081	OK	27.0052	21.2924	-0.342901	-1.47844	0.00545	0.100131	no	25.5507	26.1089	29.3561	21.3837	20.9533	21.4488
ENSMUSG00000073164	2410018L13Rik	12:22953996-23010284	OK	0.860974	0.678878	-0.342819	-0.574533	0.28045	0.963377	no	0.623601	1.11901	0.840313	0.342593	1.08944	0.940884
ENSMUSG00000034110	Kctd7	5:130144860-130155806	OK	1.83294	1.44531	-0.34278	-0.865371	0.10405	0.666184	no	1.99888	1.70471	1.79523	1.2857	1.56063	1.64921
ENSMUSG00000032656	2017-03-03	18:56761715-56925548	OK	1.33188	1.05038	-0.342544	-0.689449	0.2004	0.87655	no	1.18406	1.64593	1.16564	0.999467	1.1631	1.0395
ENSMUSG00000034112	Atp2c2	8:119700008-119757717	OK	1.66041	1.30953	-0.342491	-1.06261	0.04685	0.431579	no	1.66418	1.61795	1.6991	1.24677	1.66459	1.07999
ENSMUSG00000037709	Fam13a	6:58932089-59024549	OK	1.29611	1.02229	-0.342376	-0.747252	0.1441	0.762669	no	1.07626	1.31647	1.49559	1.04035	1.01112	0.997363
ENSMUSG00000002228	Ppm1j	3:104752726-104786018	OK	1.1614	0.916081	-0.342316	-0.429611	0.4121	0.999642	no	1.34924	0.98079	1.15416	0.811474	0.920489	1.12089
ENSMUSG00000063698	Sfxn4	19:60837276-60861479	OK	7.62071	6.01126	-0.34226	-1.30223	0.01465	0.204198	no	8.8116	6.61773	7.43282	5.073	7.33155	6.56749
ENSMUSG00000033006	Sox10	15:79154912-79164490	OK	4.57216	3.60655	-0.342256	-1.41747	0.00845	0.138324	no	7.17397	2.92415	3.61837	4.23745	2.93865	3.01266
ENSMUSG00000052331	Ankrd44	1:54645339-54926387	OK	11.9453	9.42441	-0.341966	-1.09415	0.04055	0.397015	no	9.51572	13.2328	13.0873	9.06191	8.97866	10.5951
ENSMUSG00000029123	Stk32b	5:37446824-37717171	OK	0.922565	0.727965	-0.34178	-1.01479	0.06145	0.509267	no	0.959302	0.825759	0.982633	0.522238	0.970145	0.897241
ENSMUSG00000024352	Spata24	18:35656689-35662186	OK	15.6215	12.3267	-0.341753	-1.30223	0.0153	0.208507	no	13.8842	15.3487	17.6317	11.4083	12.7775	13.7125
ENSMUSG00000028736	Pax7	4:139737061-139833528	OK	5.55277	4.38175	-0.341701	-1.53259	0.00415	0.0816991	no	6.13169	5.37044	5.15619	3.98814	5.04624	4.50449
ENSMUSG00000036862	Dchs1	7:105752989-105863650	OK	9.9789	7.87452	-0.341689	-0.90233	0.05415	0.474732	no	8.73468	11.2331	9.96891	6.99131	8.27512	9.24032
ENSMUSG00000049588	Ccdc69	11:55049730-55078131	OK	0.294431	0.232436	-0.341098	-0.498391	0.307	0.98346	no	0.254497	0.301706	0.32709	0.263239	0.120602	0.282664
ENSMUSG00000036278	Macrod1	19:7056767-7198061	OK	3.14125	2.48006	-0.340964	-0.851461	0.1189	0.700632	no	3.02434	3.32925	3.07015	1.99481	3.08272	2.8479
ENSMUSG00000032715	Trib3	2:152337421-152344032	OK	1.04411	0.824383	-0.340886	-0.660943	0.17705	0.837675	no	0.862828	0.879275	1.39023	0.941686	0.780078	0.634084
ENSMUSG00000073478	D730003I15Rik	1:191224453-191226140	OK	1.67686	1.32408	-0.340778	-0.63402	0.23445	0.918721	no	1.55424	1.70942	1.76693	1.31531	1.22989	1.4358
ENSMUSG00000049999	Ppp1r3d	2:178411205-178414472	OK	0.924724	0.730243	-0.340645	-0.999366	0.06715	0.530819	no	0.965457	0.666355	1.14236	0.602341	0.763125	0.953164
ENSMUSG00000046580	Gm7862	12:76120418-76177259	OK	48.3169	38.1576	-0.340559	-1.08576	0.0446	0.418556	no	43.65	63.1525	38.1483	24.2516	61.4638	42.6633
ENSMUSG00000071656	Lrrn4cl	19:8850784-8853909	OK	0.306618	0.242188	-0.340314	-0.676504	0.2178	0.897699	no	0.177554	0.336616	0.405685	0.193855	0.263325	0.317719
ENSMUSG00000062458	Gm8623	8:47632328-47632764	OK	1.47379	1.16432	-0.340037	-0.529761	0.31925	0.994728	no	1.00595	1.99326	1.42216	1.35265	0.722994	1.22901
ENSMUSG00000070462	Mesdc1	7:83879872-83884305	OK	21.1021	16.6718	-0.339977	-2.02552	0.00015	0.00546921	yes	21.6023	21.1163	20.5876	14.8866	19.6155	17.2983
ENSMUSG00000038679	Trps1	15:50654751-50890463	OK	6.9996	5.53141	-0.339626	-1.54224	0.00295	0.0631155	no	5.97597	6.95292	8.06991	5.01665	5.44501	6.64734
ENSMUSG00000025496	Drd4	7:141292005-141296464	OK	0.430842	0.340483	-0.339574	-0.593674	0.2589	0.941288	no	0.335901	0.457941	0.498683	0.319864	0.451008	0.271198
ENSMUSG00000000392	Fap	2:62500942-62574075	OK	4.18859	3.31036	-0.339475	-0.987419	0.05975	0.50096	no	3.76453	4.13031	4.67092	2.66301	4.12367	3.79175
ENSMUSG00000092183	4930515G01Rik	5:114727406-114806200	OK	0.332771	0.263074	-0.339063	-0.0995273	0.8698	0.999642	no	0.247305	0.346482	0.404526	0.279051	0.369333	0.124859
ENSMUSG00000060260	Pwwp2b	7:139248481-139269903	OK	3.33151	2.63388	-0.338989	-1.30681	0.0149	0.205772	no	3.05949	3.09817	3.83689	2.69027	2.46966	2.68532
ENSMUSG00000017300	Tnnc2	2:164769897-164779967	OK	0.318633	0.251911	-0.338981	-0.0434605	0.80535	0.999642	no	0.141615	0.571607	0.242678	0.248684	0.242337	0.267941
ENSMUSG00000086328	2700033N17Rik	2:116066217-116085911	OK	3.99444	3.15802	-0.338971	-0.816516	0.1232	0.711661	no	3.89519	4.5372	3.55093	2.62352	3.81334	3.57171
ENSMUSG00000105929	Gm43693	5:32863700-32994236	OK	0.566346	0.447776	-0.338907	-0.171597	0.7301	0.999642	no	0.628317	0.666937	0.403785	0.417819	0.506862	0.448606
ENSMUSG00000031438	Rnf128	X:139563315-139673145	OK	2.05521	1.6253	-0.338581	-1.13178	0.03575	0.363151	no	2.30696	1.81627	2.04239	1.4433	1.67426	1.94033
ENSMUSG00000105368	Gm43759	5:112343082-112378414	OK	0.964934	0.763089	-0.33858	-0.258145	0.63785	0.999642	no	0.843035	1.53854	0.513225	0.849066	0.615023	0.7392
ENSMUSG00000100351	Gm7867	1:93305963-93373489	OK	1.39337	1.102	-0.338462	-0.105681	0.86965	0.999642	no	1.84608	1.27953	1.05451	1.13155	0.702019	1.44287
ENSMUSG00000038217	Tlcd2	11:75461538-75470899	OK	7.93395	6.27604	-0.338184	-1.13877	0.0319	0.336028	no	7.70614	6.78106	9.31466	6.0668	6.66316	6.30742
ENSMUSG00000103677	Pcdhga4	18:36930183-37841873	OK	1.03674	0.8201	-0.338176	-0.146608	0.70715	0.999642	no	1.08635	1.26239	0.761465	0.680499	0.863255	1.05615
ENSMUSG00000049511	Htr1b	9:81628290-81645156	OK	0.501609	0.396837	-0.338017	-0.679235	0.19785	0.874234	no	0.479573	0.461848	0.563405	0.361326	0.378578	0.486117
ENSMUSG00000030380	Mzf1	7:13042302-13054764	OK	1.12962	0.893715	-0.337953	-0.485197	0.3127	0.98903	no	1.18052	0.953291	1.25505	0.722934	1.02379	1.1052
ENSMUSG00000103574	Gm37116	3:88242873-88296999	OK	6.3568	5.02974	-0.337816	-0.143113	0.8298	0.999642	no	2.39171	10.5311	6.1476	4.94755	4.91118	5.31268
ENSMUSG00000032456	Nmnat3	9:98287434-98420438	OK	0.962564	0.761731	-0.337601	-0.368073	0.38605	0.999642	no	0.60538	1.18754	1.09477	0.49955	1.41837	0.629449
ENSMUSG00000021720	Rnf180	13:105149351-105271039	OK	2.18382	1.72829	-0.337508	-1.04093	0.0549	0.477254	no	1.9549	2.32144	2.2751	1.52848	1.97557	1.88062
ENSMUSG00000087365	C430049B03Rik	X:53055045-53057190	OK	11.4625	9.07394	-0.337119	-1.20867	0.02535	0.291375	no	12.5629	10.4466	11.3779	8.23269	9.92921	9.90119
ENSMUSG00000025351	Cd63	10:128908918-128912816	OK	80.5747	63.8181	-0.336363	-1.92871	0.00025	0.00851392	yes	77.0608	75.4872	89.1761	63.8291	64.7832	62.8308
ENSMUSG00000089889	0610040B10Rik	5:143316488-143332704	OK	3.74753	2.96912	-0.335904	-0.35432	0.51005	0.999642	no	3.80766	3.03574	4.3992	2.81332	3.69646	2.5534
ENSMUSG00000100510	AV026068	8:57304264-57320859	OK	18.7419	14.8539	-0.335425	-1.16536	0.03175	0.335617	no	16.9495	19.4939	19.7822	14.0586	16.1012	15.1971
ENSMUSG00000095098	Ccdc85b	19:5456788-5457397	OK	26.3141	20.8553	-0.335422	-1.36626	0.01065	0.163178	no	31.4294	27.5386	19.9743	13.8043	33.9309	21.8816
ENSMUSG00000044827	Tlr1	5:64924678-64933563	OK	1.09245	0.866023	-0.335084	-0.572424	0.2612	0.943416	no	0.835743	1.06149	1.3801	0.621013	1.42522	0.796849
ENSMUSG00000033149	Phldb2	16:45746242-46010218	OK	24.2188	19.2001	-0.335014	-1.14719	0.0041	0.0810044	no	23.5464	24.4576	24.6524	19.0727	18.3367	20.3183
ENSMUSG00000102997	Gm17244	4:123105164-123139951	OK	0.381446	0.302428	-0.334887	-0.159996	0.86025	0.999642	no	0.302715	0.285643	0.555981	0.268422	0.288624	0.384246
ENSMUSG00000103945	Gm38228	1:43444578-43570515	OK	0.405607	0.321632	-0.334668	-0.159246	0.8623	0.999642	no	0.280059	0.35557	0.581191	0.311827	0.375862	0.287013
ENSMUSG00000026197	Zfand2b	1:75168645-75171629	OK	14.7117	11.6674	-0.334473	-1.37811	0.00945	0.150517	no	13.6758	15.1481	15.3111	11.5462	12.1473	11.4301
ENSMUSG00000031740	Mmp2	8:92827290-92853420	OK	50.9143	40.3814	-0.33438	-1.4612	0.0064	0.112696	no	48.1132	55.4029	49.2269	38.8679	42.8004	40.9895
ENSMUSG00000073607	Gm10548	18:34207774-34322189	OK	1.44236	1.14407	-0.334252	-0.0834019	0.7335	0.999642	no	1.62688	1.32822	1.37197	1.37105	0.929861	0.904313
ENSMUSG00000046916	Myct1	10:5593727-5606787	OK	1.93203	1.53268	-0.334057	-1.14534	0.03315	0.344581	no	1.82557	1.92924	2.04127	1.62392	1.44328	1.43961
ENSMUSG00000079557	2017-03-02	17:33646232-33718670	OK	18.4325	14.624	-0.333906	-0.24368	0.551	0.999642	no	17.1893	17.4485	20.6595	14.7636	15.3119	13.6571
ENSMUSG00000041481	Serpina3g	12:104236244-104241939	OK	0.302455	0.240008	-0.33364	-0.345301	0.40465	0.999642	no	0.283088	0.386905	0.237373	0.193276	0.345345	0.228135
ENSMUSG00000041836	Ptpre	7:135537480-135686293	OK	0.267962	0.212657	-0.3335	-0.583755	0.2199	0.898239	no	0.211586	0.291706	0.300594	0.266128	0.175531	0.142841
ENSMUSG00000034957	Cebpa	7:35118043-35121928	OK	1.57167	1.24742	-0.333358	-1.00539	0.06345	0.517022	no	1.59456	1.42563	1.69484	1.25247	1.20626	1.27846
ENSMUSG00000004263	Atn1	6:124739182-124756524	OK	24.7248	19.6346	-0.332559	-0.551968	0.15765	0.794358	no	29.0326	21.175	23.9668	15.9766	20.1133	26.4721
ENSMUSG00000096883	Shisa8	15:82206951-82212815	OK	0.308759	0.245234	-0.332323	-0.583628	0.28405	0.966127	no	0.234599	0.258251	0.433427	0.181993	0.421527	0.195422
ENSMUSG00000003273	Car11	7:45699842-45704682	OK	5.78911	4.59848	-0.332185	-0.446814	0.36575	0.999642	no	5.44772	6.81991	5.09969	5.29018	3.07877	4.73477
ENSMUSG00000021221	Dpf3	12:83213744-83487716	OK	0.956037	0.759589	-0.331848	-0.478173	0.34515	0.999642	no	1.24766	0.910686	0.709763	0.591796	0.974028	0.880737
ENSMUSG00000056220	Pla2g4a	1:149829617-149961290	OK	8.58897	6.8257	-0.331508	-0.790655	0.1049	0.667939	no	9.28098	8.92269	7.56325	6.54519	7.27015	6.94228
ENSMUSG00000024588	Fech	18:64456549-64489066	OK	17.8153	14.161	-0.33119	-1.86373	0.0007	0.0207948	yes	15.6717	20.7863	16.9879	13.1498	15.519	14.8257
ENSMUSG00000048120	Entpd1	19:40612365-40741602	OK	4.36976	3.4747	-0.330664	-0.545118	0.25285	0.935273	no	4.01246	5.75282	3.344	2.79889	4.87604	3.42498
ENSMUSG00000086770	Gm15351	8:12757013-13020905	OK	4.31221	3.42941	-0.330466	-0.143115	0.8005	0.999642	no	3.85752	4.46132	4.61779	3.51158	3.29528	3.3992
ENSMUSG00000097806	Gm6556	13:15440301-15730026	OK	1.2588	1.00134	-0.330114	-0.164346	0.6238	0.999642	no	0.980349	1.31222	1.48382	0.943354	0.813713	1.30494
ENSMUSG00000073079	Srp54a	12:55089201-55112891	OK	0.566776	0.45107	-0.329428	-0.665685	0.2148	0.894775	no	0.590408	0.512068	0.597852	0.42563	0.495979	0.457039
ENSMUSG00000042389	Tsen2	6:115544663-115578628	OK	13.0767	10.4101	-0.329006	-0.733065	0.1775	0.838846	no	10.8523	14.3872	13.9905	7.99877	14.1944	11.4486
ENSMUSG00000026456	Cyb5r1	1:134405558-134411740	OK	19.4301	15.469	-0.328913	-0.991053	0.06035	0.504199	no	20.975	18.9408	18.3744	14.2559	17.8495	15.5146
ENSMUSG00000092074	Dynlt1a	17:6310546-6493180	OK	11.1272	8.85885	-0.328894	-0.8467	0.11395	0.688662	no	10.0118	10.4462	12.9235	8.14948	8.98344	10.153
ENSMUSG00000017491	Rarb	14:16430841-16575472	OK	18.56	14.7789	-0.328656	-1.87432	0.0005	0.0156708	yes	18.3937	17.7924	19.4941	13.8273	15.5819	15.8793
ENSMUSG00000074355	Gm10676	7:18989553-19001766	OK	0.304491	0.24249	-0.32847	-0.296561	0.5683	0.999642	no	0.326723	0.376791	0.209958	0.136788	0.359423	0.336964
ENSMUSG00000066894	Vsig10	5:117318496-117355005	OK	4.42049	3.52047	-0.328438	-0.659137	0.1949	0.869316	no	3.96493	4.2013	5.09525	3.97638	3.03147	3.09766
ENSMUSG00000050621	Rps27rt	9:114978568-115232225	OK	20.6876	16.4774	-0.328278	-0.589092	0.28345	0.966127	no	23.3729	12.7876	25.9024	19.688	8.19091	18.3428
ENSMUSG00000026630	Batf3	1:191097846-191108945	OK	4.3164	3.43806	-0.328234	-0.876214	0.0991	0.651935	no	4.19923	4.39518	4.35479	3.25847	3.29355	3.94173
ENSMUSG00000064339	mt-Rnr2	MT:1093-2675	OK	242.822	193.448	-0.327952	-1.98649	0.00025	0.00851392	yes	223.705	260.631	244.13	220.226	156.248	177.093
ENSMUSG00000032014	Oaf	9:43221277-43239816	OK	24.8502	19.7997	-0.32778	-1.87718	0.00085	0.024374	yes	24.1853	23.3829	26.9825	19.7816	20.2319	19.4037
ENSMUSG00000106943	Dancr	5:74092136-74095406	OK	0.780062	0.621537	-0.327747	-0.368843	0.4891	0.999642	no	0.84275	0.989677	0.507758	0.501455	0.923823	0.559416
ENSMUSG00000078141	Gm2399	13:12702361-12702589	OK	0.713042	0.568421	-0.327028	-0.326504	0.70205	0.999642	no	1.5649	0.574225	0	0	0.535584	1.7381
ENSMUSG00000029603	Dtx1	5:120680201-120711927	OK	1.83135	1.45994	-0.326997	-0.55091	0.2898	0.969188	no	1.49449	1.69603	2.30353	1.29257	1.51183	1.74279
ENSMUSG00000006403	Adamts4	1:171234852-171260637	OK	1.88035	1.4991	-0.326912	-0.374124	0.49195	0.999642	no	2.08726	1.89516	1.65864	1.45286	1.6254	1.46526
ENSMUSG00000026988	Wdsub1	2:59852363-59882591	OK	16.2692	12.9705	-0.326905	-0.959935	0.07185	0.550439	no	16.3498	16.0221	16.4357	11.8711	13.1433	14.9967
ENSMUSG00000004035	Gstm7	3:107926333-107931817	OK	18.7809	14.9741	-0.326797	-1.11808	0.03715	0.372334	no	16.6212	19.658	20.0635	12.438	19.0929	15.9276
ENSMUSG00000027346	Gpcpd1	2:132529081-132587729	OK	12.0995	9.64704	-0.326789	-1.43475	0.0044	0.0851991	no	10.433	13.5476	12.3179	7.73883	12.1244	10.9861
ENSMUSG00000002289	Angptl4	17:33773749-33781575	OK	9.16974	7.31198	-0.326619	-1.34622	0.0118	0.17433	no	8.98876	8.01249	10.508	7.18661	7.82117	7.05352
ENSMUSG00000105881	4932422M17Rik	5:123047372-123250131	OK	0.572254	0.456326	-0.326592	-0.187377	0.72775	0.999642	no	0.54933	0.572888	0.594545	0.418677	0.48486	0.503089
ENSMUSG00000039481	Nrtn	17:56751324-56757530	OK	2.18929	1.74607	-0.326355	-0.844624	0.1158	0.694193	no	2.31825	2.07939	2.17025	1.21374	2.58595	1.97085
ENSMUSG00000030559	Rab38	7:88430272-88491572	OK	6.90227	5.50604	-0.326056	-0.981351	0.06855	0.536353	no	6.6509	5.1645	8.89143	5.36341	6.13183	5.16552
ENSMUSG00000105854	Gm8925	5:12383384-12588948	OK	0.565174	0.450859	-0.32602	-0.180404	0.72485	0.999642	no	0.419009	0.737975	0.538539	0.303373	0.731328	0.465363
ENSMUSG00000070327	Rnf213	11:119393099-119491298	OK	0.469453	0.374579	-0.325712	-0.494921	0.3519	0.999642	no	0.391298	0.500583	0.516477	0.339073	0.456097	0.364071
ENSMUSG00000019929	Dcn	10:97479499-97518162	OK	1.75462	1.40045	-0.325273	-0.963075	0.0715	0.549031	no	1.56484	1.61223	2.0868	1.29677	1.18869	1.81956
ENSMUSG00000030351	Tspan11	6:127887588-127953977	OK	2.98216	2.38026	-0.32524	-0.558504	0.28425	0.966182	no	2.29088	2.95675	3.69885	1.96475	3.03605	2.55548
ENSMUSG00000074738	Fndc10	4:155694341-155696481	OK	3.05215	2.43617	-0.325211	-1.16004	0.0312	0.333004	no	3.00565	2.61493	3.53586	2.06841	2.70028	2.90756
ENSMUSG00000057836	Xlr3a	X:73086292-73097095	OK	1.15256	0.919969	-0.325189	-0.376688	0.4814	0.999642	no	1.99485	0.903884	0.558961	0.843403	0.438714	1.55436
ENSMUSG00000074971	Fibin	2:110360916-110363183	OK	3.52297	2.81213	-0.32513	-1.21368	0.0206	0.25354	no	2.95724	3.16774	4.44394	1.98823	3.60855	3.66352
ENSMUSG00000086404	Gm6787	X:8097086-8106701	OK	0.277342	0.221394	-0.32505	-0.415575	0.45	0.999642	no	0.295281	0.247521	0.289223	0.302482	0.152252	0.12836
ENSMUSG00000021118	Plek2	12:78888690-78906964	OK	1.6665	1.33062	-0.324725	-0.90591	0.0965	0.643364	no	1.34378	1.92865	1.72707	1.4955	1.29239	1.03908
ENSMUSG00000021359	Tfap2a	13:40715674-40735162	OK	10.1366	8.09533	-0.324416	-1.65315	0.0013	0.0339748	yes	11.5473	9.6615	9.20112	7.82434	7.84276	8.8899
ENSMUSG00000041798	Gck	11:5900819-5950081	OK	1.71882	1.37272	-0.324382	-0.401384	0.4287	0.999642	no	1.29583	2.25824	1.60239	1.03595	1.93553	1.48344
ENSMUSG00000031241	Tbx22	X:107667963-107688978	OK	6.74704	5.38994	-0.323985	-1.06858	0.04685	0.431579	no	6.69027	7.38717	6.16367	4.10445	5.76172	7.58913
ENSMUSG00000020689	Itgb3	11:104607999-104670476	OK	1.36158	1.08781	-0.323859	-1.20874	0.0246	0.285536	no	1.13604	1.65334	1.29537	1.08878	1.13169	1.04198
ENSMUSG00000053702	Nebl	2:17343908-17731464	OK	3.11547	2.49001	-0.323295	-0.495974	0.27365	0.956385	no	3.41632	2.41118	3.5189	2.52033	2.35828	2.56111
ENSMUSG00000083708	Gm13123	4:144247776-144248268	OK	4.3248	3.45719	-0.323033	-0.762168	0.1573	0.793078	no	4.21879	4.3762	4.37941	3.27277	3.49861	3.78461
ENSMUSG00000053985	Zfp14	7:30036358-30051380	OK	3.59527	2.87412	-0.322978	-0.975936	0.06965	0.541369	no	3.43022	3.14238	4.2132	2.68891	2.90162	3.21705
ENSMUSG00000060681	Slc9a6	X:56609756-56664230	OK	10.6125	8.48459	-0.322849	-1.08557	0.04075	0.398265	no	10.5275	9.82789	11.4822	8.80422	8.56404	7.76587
ENSMUSG00000008658	Rbfox1	16:6809221-7412479	OK	0.697747	0.558002	-0.322433	-0.652103	0.2177	0.897699	no	0.73888	0.6797	0.674661	0.43344	0.649013	0.716116
ENSMUSG00000052584	Serp2	14:76532813-76556687	OK	9.05461	7.24126	-0.32241	-1.10853	0.0363	0.366708	no	8.63108	9.27065	9.26208	6.28395	8.90492	7.49223
ENSMUSG00000087331	1810021B22Rik	15:89059733-89087077	OK	1.62468	1.29957	-0.322116	-0.146646	0.76415	0.999642	no	1.55495	1.41185	1.90723	1.64179	1.20897	0.705759
ENSMUSG00000032327	Stra6	9:58028676-58153996	OK	20.5292	16.423	-0.321966	-1.23745	0.01635	0.217259	no	20.0192	20.7949	20.7737	15.4644	18.4637	16.2994
ENSMUSG00000058443	Rpl10-ps3	9:50344239-50344981	OK	0.337436	0.269942	-0.321965	-0.367075	0.48485	0.999642	no	0.261178	0.191673	0.559457	0.0450248	0.312856	0.676862
ENSMUSG00000020256	Aldh1l2	10:83360220-83534140	OK	0.939778	0.751819	-0.321934	-0.300291	0.46175	0.999642	no	0.657036	1.2087	0.953601	0.696338	0.969415	0.645186
ENSMUSG00000085704	4921531C22Rik	2:179912151-179979013	OK	4.56564	3.65311	-0.321693	-0.401386	0.45105	0.999642	no	4.55828	4.24723	4.89141	3.37606	3.58583	4.27448
ENSMUSG00000036273	Lrrk2	15:91673174-91816120	OK	0.917267	0.733986	-0.321589	-0.289622	0.55355	0.999642	no	0.44592	0.96969	1.33619	0.601775	1.05392	0.678477
ENSMUSG00000044328	Trp53i13	11:77508098-77607815	OK	13.7762	11.0248	-0.321424	-0.492174	0.28575	0.967952	no	13.9391	11.7285	15.6609	11.1819	11.9504	9.78501
ENSMUSG00000055053	Nfic	10:81396185-81431005	OK	7.19371	5.75797	-0.321177	-0.677514	0.2005	0.87655	no	8.2599	6.69756	6.62367	5.51708	6.16943	5.82827
ENSMUSG00000058838	Rps27a-ps2	9:83390292-83454573	OK	2.86067	2.29037	-0.32077	-0.28241	0.60295	0.999642	no	2.48649	3.12813	2.96739	2.20443	2.18823	2.5644
ENSMUSG00000037771	Slc32a1	2:158610766-158615748	OK	1.14332	0.915466	-0.32065	-0.920626	0.08585	0.605459	no	0.9865	1.24537	1.19809	0.393175	1.46821	1.4073
ENSMUSG00000026787	Gad2	2:22622204-22693874	OK	2.5118	2.01145	-0.320484	-0.657599	0.21705	0.897475	no	2.33731	2.74458	2.45351	1.1074	3.32656	2.50444
ENSMUSG00000008318	Relt	7:100845846-100863446	OK	3.08827	2.47323	-0.320399	-0.44353	0.3826	0.999642	no	1.84278	3.05202	4.37	2.43228	2.99092	2.03747
ENSMUSG00000066196	Spag8	4:43651334-43653594	OK	1.04615	0.837815	-0.320389	-0.564665	0.2628	0.945833	no	0.947232	1.13333	1.0579	0.794501	0.752267	1.00999
ENSMUSG00000039116	Adgrg6	10:14402582-14545179	OK	0.39405	0.315634	-0.320127	-0.314776	0.55195	0.999642	no	0.488443	0.395563	0.298144	0.132067	0.448189	0.550214
ENSMUSG00000027962	Vcam1	3:116109948-116141016	OK	17.6365	14.1274	-0.320063	-1.37252	0.0104	0.161141	no	15.3932	16.7828	20.7334	12.2602	15.6652	16.324
ENSMUSG00000027894	Slc6a17	3:107467542-107518018	OK	3.84065	3.07672	-0.31996	-0.547498	0.2882	0.969188	no	3.83097	5.00463	2.68635	2.77417	3.74248	3.01604
ENSMUSG00000031613	Hpgd	8:56294584-56321043	OK	16.7464	13.4165	-0.319842	-1.60941	0.00265	0.058438	no	16.4477	17.0758	16.7156	12.7144	15.5359	12.7013
ENSMUSG00000035305	Ror1	4:100095790-100444765	OK	4.75535	3.80997	-0.319771	-1.63683	0.00185	0.0444134	yes	4.49812	5.13759	4.63033	3.8881	3.61233	3.85134
ENSMUSG00000090386	Mir99ahg	16:77236316-77691403	OK	3.29054	2.63653	-0.319685	-0.530675	0.24015	0.927057	no	2.86061	3.58491	3.4261	2.25293	2.66007	3.3802
ENSMUSG00000071568	Gm5874	6:18824551-18825059	OK	14.5632	11.6698	-0.319548	-1.05406	0.05085	0.457207	no	16.5293	16.5878	10.5726	8.58827	16.182	13.3207
ENSMUSG00000028524	Sgip1	4:102741296-103011965	OK	3.26035	2.6127	-0.319486	-0.488606	0.35375	0.999642	no	3.47547	2.75277	3.5528	1.78238	4.09592	2.79011
ENSMUSG00000027016	Zfp385b	2:77410633-77819639	OK	0.571884	0.458286	-0.319476	-0.421547	0.32665	0.999642	no	0.550008	0.533367	0.632277	0.365643	0.360928	0.740929
ENSMUSG00000020335	Zfp354b	11:50921822-50931633	OK	0.539991	0.432767	-0.319347	-0.635464	0.20235	0.880225	no	0.533602	0.424774	0.661597	0.452877	0.385333	0.439979
ENSMUSG00000043432	Leng9	7:4137038-4150374	OK	0.943457	0.75613	-0.319323	-0.255646	0.6273	0.999642	no	0.988151	0.973273	0.868948	0.763877	0.76894	0.727824
ENSMUSG00000042312	S100a13	3:90514434-90524581	OK	5.87746	4.71058	-0.319287	-0.953774	0.07795	0.574008	no	5.36132	5.4983	6.77276	3.93396	5.83404	5.14037
ENSMUSG00000103133	Gm37303	9:72274859-72409945	OK	0.44323	0.355235	-0.319283	-0.153202	0.80565	0.999642	no	0.328905	0.53357	0.467216	0.376013	0.28438	0.384534
ENSMUSG00000030643	Rab30	7:92741602-92844535	OK	6.29918	5.04882	-0.319216	-0.641032	0.2336	0.918201	no	6.31545	6.68632	5.89576	4.9211	6.0219	4.33119
ENSMUSG00000001999	Blvra	2:127070664-127097084	OK	10.7038	8.58036	-0.319015	-1.23681	0.02215	0.26588	no	9.30184	11.111	11.6987	7.83512	9.68055	8.97066
ENSMUSG00000003411	Rab3b	4:108879062-108972077	OK	2.41372	1.93491	-0.31899	-0.81019	0.12125	0.706914	no	2.53924	2.03377	2.66814	2.05574	1.67723	1.95093
ENSMUSG00000049691	Nkx3-2	5:41761482-41764501	OK	1.18818	0.952604	-0.318807	-0.820066	0.1266	0.718081	no	1.64242	1.36453	0.557594	0.769282	1.04999	1.22187
ENSMUSG00000050394	Armcx6	X:134748460-134751417	OK	13.8686	11.1213	-0.318491	-1.29611	0.01445	0.203124	no	13.1571	12.632	15.8166	10.8508	11.493	11.2906
ENSMUSG00000020846	Fam101b	11:76019193-76027782	OK	16.8427	13.5064	-0.318479	-1.83032	0.0005	0.0156708	yes	16.8509	15.9411	17.7362	13.1732	14.0306	13.6488
ENSMUSG00000066392	Nrxn3	12:88722875-90334935	OK	0.74707	0.599098	-0.318451	-0.354711	0.3957	0.999642	no	0.567529	0.695124	0.978556	0.529447	0.756612	0.580886
ENSMUSG00000053030	Spink2	5:77205106-77211471	OK	1.32367	1.06189	-0.317906	-0.559183	0.26085	0.94277	no	0.822117	1.38787	1.76102	0.624406	1.29429	1.70446
ENSMUSG00000075302	Erich2	2:70489939-70602014	OK	0.532772	0.427431	-0.317829	-0.142068	0.7737	0.999642	no	1.00062	0.159728	0.437972	0.357163	0.61691	0.378487
ENSMUSG00000085998	AW822252	X:53695854-53716773	OK	0.496386	0.398308	-0.317576	-0.294616	0.4981	0.999642	no	0.377175	0.45536	0.656623	0.38117	0.368429	0.462465
ENSMUSG00000044921	Rassf9	10:102512221-102546560	OK	2.2233	1.7843	-0.317343	-1.0443	0.05125	0.458806	no	2.01044	2.56399	2.09547	1.6357	2.17748	1.68832
ENSMUSG00000098326	Dlx6os1	6:6820188-6871633	OK	11.4525	9.19412	-0.316873	-0.0733764	0.87485	0.999642	no	7.35549	12.3888	14.613	7.17321	16.9834	5.44663
ENSMUSG00000039546	Ajap1	4:153373220-153482811	OK	1.27396	1.02293	-0.316614	-0.468456	0.3687	0.999642	no	1.05926	1.48387	1.27876	1.09042	1.0217	0.889166
ENSMUSG00000051599	Pcdhb2	18:36930183-37841873	OK	0.336527	0.270251	-0.316422	-0.0395355	0.7825	0.999642	no	0.30265	0.317016	0.389915	0.293695	0.157004	0.33661
ENSMUSG00000028865	Cd164l2	4:133209339-133224555	OK	0.582736	0.467982	-0.31639	-0.364434	0.4056	0.999642	no	0.57246	0.559411	0.616338	0.372018	0.369283	0.758608
ENSMUSG00000078920	Ifi47	11:48904655-49135387	OK	0.258303	0.207446	-0.316326	-0.386395	0.4251	0.999642	no	0.149727	0.34114	0.284042	0.146952	0.307952	0.227927
ENSMUSG00000032202	Rab27a	9:73044853-73097629	OK	3.40948	2.73878	-0.316016	-1.22858	0.01795	0.230186	no	2.90966	3.27044	4.04834	2.38249	2.93903	3.25113
ENSMUSG00000053040	Aph1c	9:66814993-66835534	OK	0.330067	0.265152	-0.315936	-0.280233	0.5753	0.999642	no	0.36561	0.392931	0.231659	0.217193	0.422807	0.203415
ENSMUSG00000085227	6330418K02Rik	5:138264042-138280005	OK	8.27062	6.64417	-0.315907	-0.306307	0.59775	0.999642	no	8.10137	8.90689	7.80359	6.87143	5.84234	6.99146
ENSMUSG00000097178	2310002F09Rik	7:43690417-43803826	OK	1.22653	0.985339	-0.315889	-0.304495	0.5892	0.999642	no	1.04522	0.961636	1.67273	0.939335	0.926533	1.13615
ENSMUSG00000048752	Prss50	9:110857966-110864629	OK	0.328571	0.263965	-0.31586	-0.398179	0.44485	0.999642	no	0.325161	0.564246	0.0963067	0.28067	0.153906	0.340613
ENSMUSG00000081406	Rps6-ps4	2:75138841-75322897	OK	0.633369	0.508951	-0.315519	-0.412393	0.43655	0.999642	no	0.514722	0.944359	0.441025	0.488034	0.440406	0.61933
ENSMUSG00000037580	Gch1	14:47153894-47189413	OK	0.595344	0.47856	-0.315024	-0.785106	0.144	0.762669	no	0.611566	0.48231	0.692154	0.48151	0.393623	0.557595
ENSMUSG00000103520	1110025M09Rik	15:81584173-81585028	OK	1.54328	1.2406	-0.314958	-0.694276	0.2017	0.87899	no	1.43961	1.94132	1.24891	1.07957	1.4042	1.39907
ENSMUSG00000040249	Lrp1	10:127538160-127621148	OK	18.3477	14.7504	-0.314845	-0.517355	0.32	0.995937	no	19.0936	22.7945	13.1551	14.39	15.8984	14.3231
ENSMUSG00000068617	Efcab1	16:14906636-14925879	OK	4.64873	3.73864	-0.314324	-1.30205	0.0156	0.210683	no	4.45754	4.36549	5.12316	3.48713	3.73505	4.24524
ENSMUSG00000097828	6430562O15Rik	13:99344785-99415561	OK	0.277143	0.222953	-0.313896	-0.187356	0.7315	0.999642	no	0.308224	0.245909	0.277298	0.180659	0.210978	0.319514
ENSMUSG00000081684	Rps2-ps13	X:52898587-52899469	OK	1.96544	1.58119	-0.31384	-0.751516	0.1642	0.810063	no	1.58976	2.6631	1.64345	1.35839	1.88066	1.72732
ENSMUSG00000082895	Rpsa-ps9	2:28477165-28478050	OK	1.8544	1.49216	-0.313553	-0.737139	0.1744	0.831807	no	1.37632	2.19687	1.99001	1.77949	1.3778	1.03184
ENSMUSG00000039701	Usp53	3:122931492-122984510	OK	3.29601	2.65287	-0.313164	-0.407122	0.38825	0.999642	no	3.62913	2.52993	3.72897	3.38153	1.76343	2.085
ENSMUSG00000033420	Antxr1	6:87133852-87335821	OK	13.9983	11.2674	-0.313094	-1.80534	0.00135	0.0349498	yes	12.9973	14.8422	14.1555	10.3275	11.7159	12.6989
ENSMUSG00000069895	Atxn1l	8:109726450-109737739	OK	17.2858	13.9175	-0.312687	-0.396012	0.35095	0.999642	no	13.4573	23.1411	15.259	13.6438	14.8122	13.5702
ENSMUSG00000089875	Etohd2	13:59769964-59823147	OK	0.70199	0.565284	-0.312474	-0.183049	0.7497	0.999642	no	0.799714	0.690418	0.615837	0.545383	0.713519	0.456851
ENSMUSG00000028020	Glrb	3:80843598-80913660	OK	4.03068	3.24579	-0.312453	-0.86622	0.1031	0.664677	no	3.25736	4.49335	4.34132	2.85509	3.99191	3.28107
ENSMUSG00000046440	Gm5564	5:138504812-138505779	OK	0.461569	0.371712	-0.312359	-0.493577	0.348	0.999642	no	0.52219	0.507209	0.355307	0.349493	0.378462	0.4094
ENSMUSG00000049411	Tmem241	18:11964449-12121537	OK	2.54503	2.04967	-0.312287	-0.653757	0.21485	0.894775	no	2.15783	2.54941	2.92784	1.93146	2.23204	2.10373
ENSMUSG00000022235	Cmbl	15:31568790-31590119	OK	2.07126	1.66847	-0.311984	-0.506542	0.33595	0.999642	no	1.52847	2.65556	2.02975	1.60973	1.46656	1.98785
ENSMUSG00000031090	Nadsyn1	7:143795583-143822849	OK	4.40512	3.54852	-0.311966	-0.740818	0.15625	0.791418	no	4.90386	5.04212	3.2694	3.56519	3.4059	3.65779
ENSMUSG00000029718	Pcolce	5:137605102-137629002	OK	52.3883	42.202	-0.311934	-1.43212	0.00855	0.139822	no	54.0036	53.8626	49.2986	39.9004	43.0412	45.9659
ENSMUSG00000070394	Tmem256	11:69838513-69839618	OK	197.852	159.412	-0.311659	-1.72661	0.00125	0.0331933	yes	163.732	175.92	253.904	150.343	169.69	167.273
ENSMUSG00000066057	Gm1976	17:94750099-94834799	OK	2.49497	2.0104	-0.311539	-0.261878	0.625	0.999642	no	1.97946	1.3312	4.17426	1.65254	2.54211	2.19443
ENSMUSG00000028268	Gbp3	3:142560025-142573209	OK	0.28148	0.226837	-0.311381	-0.233775	0.5228	0.999642	no	0.378242	0.187169	0.27903	0.175198	0.2739	0.28305
ENSMUSG00000005611	Mrvi1	7:110868265-110982461	OK	0.766635	0.617868	-0.311242	-0.314774	0.54445	0.999642	no	0.471015	1.0247	0.804188	0.640415	0.472409	0.718232
ENSMUSG00000028457	Atp8b5	4:43267158-43373833	OK	0.394728	0.318143	-0.311186	-0.468874	0.33335	0.999642	no	0.30905	0.535878	0.339257	0.254233	0.376697	0.387408
ENSMUSG00000105388	Rpl36a-ps2	3:145758674-145894277	OK	5.40958	4.36001	-0.311185	-0.181535	0.7245	0.999642	no	4.67705	7.29383	4.25786	3.82984	4.80212	4.97824
ENSMUSG00000086937	Gm15063	X:75572045-75578231	OK	0.518356	0.417903	-0.310773	-0.162356	0.77215	0.999642	no	0.440844	0.3733	0.740923	0.455986	0.382998	0.376642
ENSMUSG00000073460	Pnldc1	17:12888901-12910000	OK	0.830379	0.669902	-0.309821	-0.723409	0.1852	0.856369	no	0.995199	0.886862	0.609078	0.767952	0.389262	0.754441
ENSMUSG00000057103	Nat8f1	6:85910153-85930284	OK	2.91718	2.35344	-0.309804	-0.27111	0.5218	0.999642	no	2.65704	2.86484	3.22967	2.37486	2.4924	2.17165
ENSMUSG00000034266	Batf	12:85686668-85709087	OK	0.853593	0.688697	-0.309678	-0.602287	0.2693	0.953258	no	0.842587	0.996243	0.721947	0.742413	0.576747	0.693216
ENSMUSG00000030157	Clec2d	6:129180614-129186534	OK	0.876738	0.707379	-0.309662	-0.6555	0.21885	0.897912	no	0.604203	0.920933	1.10508	0.648992	0.524921	1.00661
ENSMUSG00000000093	Tbx2	11:85832550-85841948	OK	45.4454	36.6898	-0.308757	-1.86353	0.0006	0.0183863	yes	50.5016	46.563	39.2717	29.2432	47.6691	40.6037
ENSMUSG00000037270	4932438A13Rik	3:36863103-37060035	OK	3.63234	2.93262	-0.308709	-0.605856	0.07805	0.574232	no	2.51298	4.01393	4.37011	3.06724	2.77013	2.82588
ENSMUSG00000083773	Gm13394	2:28926948-29055066	OK	179.745	145.126	-0.308645	-0.579782	0.2701	0.953868	no	194.667	179.188	165.382	205.982	0.241867	168.299
ENSMUSG00000098056	Gm8100	8:28185839-28186827	OK	0.422664	0.341261	-0.308634	-0.476112	0.3789	0.999642	no	0.538123	0.230369	0.499499	0.340149	0.153476	0.531272
ENSMUSG00000047793	Sned1	1:93235840-93305915	OK	3.41135	2.75436	-0.308626	-0.306965	0.58805	0.999642	no	3.67551	4.32742	2.23112	1.90698	2.83164	4.37184
ENSMUSG00000038811	Gngt2	11:95700105-95845734	OK	6.32657	5.10834	-0.308568	-0.278197	0.6431	0.999642	no	5.92318	5.65416	7.40237	5.16347	5.80756	4.29888
ENSMUSG00000104675	Gm43689	3:137918018-137918445	OK	0.612465	0.49458	-0.308424	-0.280054	0.58455	0.999642	no	0.62776	0.806225	0.403409	0.649322	0.214849	0.464825
ENSMUSG00000051379	Flrt3	2:140395308-142392966	OK	19.7483	15.9474	-0.30841	-1.69297	0.0015	0.0376527	yes	20.1809	20.026	19.038	15.9218	15.5912	16.3547
ENSMUSG00000030882	Dnhd1	7:105634202-105721799	OK	0.349877	0.282553	-0.308327	-0.103497	0.77415	0.999642	no	0.294625	0.358514	0.396492	0.241922	0.330679	0.315689
ENSMUSG00000029673	Auts2	5:131437332-132543344	OK	20.3603	16.4447	-0.308137	-0.825269	0.0744	0.559847	no	17.3109	28.6071	15.1628	15.3484	17.3711	17.7107
ENSMUSG00000081049	Rps24-ps3	X:79195046-79195448	OK	2.56505	2.0719	-0.30803	-0.553787	0.3042	0.982109	no	1.88332	2.33235	3.47948	2.19151	1.81283	2.09176
ENSMUSG00000030306	Tmtc1	6:148232429-148444389	OK	0.645454	0.521364	-0.308022	-0.47158	0.35015	0.999642	no	0.602808	0.610421	0.723133	0.409685	0.669917	0.596169
ENSMUSG00000001583	Tnk1	11:69846375-69858730	OK	1.29807	1.04873	-0.307722	-0.27008	0.5406	0.999642	no	1.32441	1.45137	1.11844	1.08964	0.842385	1.17327
ENSMUSG00000063605	Ccdc102a	8:94902868-94918098	OK	11.3706	9.18682	-0.307669	-1.26695	0.0211	0.258155	no	11.9889	11.1862	10.9366	8.49553	11.0193	8.73691
ENSMUSG00000031310	Zmym3	X:101404383-101420849	OK	23.3516	18.8681	-0.307572	-0.816962	0.1321	0.733164	no	23.3367	23.8668	22.8514	17.4993	19.5117	20.9623
ENSMUSG00000023007	Prpf40b	15:99295086-99317018	OK	34.111	27.5733	-0.306964	-1.20864	0.0248	0.287051	no	36.4496	34.4579	31.4255	24.4052	31.4359	30.0471
ENSMUSG00000021363	Mak	13:41025119-41079706	OK	0.398454	0.322199	-0.306462	-0.722224	0.17275	0.828247	no	0.501729	0.319158	0.374476	0.358756	0.284466	0.286819
ENSMUSG00000091994	E130317F20Rik	10:79851380-79883174	OK	3.36141	2.71817	-0.306431	-0.176978	0.74795	0.999642	no	2.90594	3.68001	3.49829	2.47444	3.06242	2.86139
ENSMUSG00000085442	Gm3362	15:37923951-37961318	OK	1.38858	1.12291	-0.306368	-0.213579	0.68695	0.999642	no	1.51535	1.27563	1.37477	1.10641	1.18979	1.08904
ENSMUSG00000021136	Smoc1	12:81026807-81186414	OK	22.5344	18.228	-0.305967	-1.79712	0.00085	0.024374	yes	24.0497	22.5846	20.9687	16.2765	20.4185	19.9407
ENSMUSG00000060591	Ifitm2	7:140948957-140955987	OK	229.971	186.03	-0.305916	-1.83909	0.0009	0.0254108	yes	229.711	205.221	254.98	190.414	181.02	182.272
ENSMUSG00000059775	Rps26-ps1	8:107436364-107558595	OK	6.70698	5.42598	-0.30578	-0.196871	0.7124	0.999642	no	6.56552	7.48629	6.06914	4.80465	6.77477	5.31987
ENSMUSG00000031239	Itm2a	X:107397098-107403376	OK	70.6157	57.1329	-0.305668	-1.83581	0.0007	0.0207948	yes	65.99	64.8623	80.9949	50.3101	59.7781	68.1332
ENSMUSG00000097011	Gm4651	6:120931706-121130999	OK	0.261906	0.211922	-0.305515	-0.141141	0.86815	0.999642	no	0.397071	0.226151	0.162497	0.257454	0.196758	0.136025
ENSMUSG00000084938	BB557941	2:57127478-57181754	OK	0.764525	0.618688	-0.305351	-0.602753	0.26525	0.949683	no	0.761321	0.72248	0.809772	0.624546	0.700817	0.524843
ENSMUSG00000030717	Nupr1	7:126623248-126630861	OK	0.689522	0.558011	-0.305304	-0.333207	0.47805	0.999642	no	0.945875	0.54842	0.574272	0.462167	0.498874	0.808835
ENSMUSG00000041298	Katnal1	5:148871583-149015813	OK	8.22472	6.65634	-0.305239	-0.825903	0.12615	0.718007	no	8.38315	9.68939	6.60163	5.84925	7.41326	7.51359
ENSMUSG00000029804	Herc3	6:58831464-58920398	OK	5.35105	4.33096	-0.305134	-0.423591	0.32035	0.996056	no	5.13937	6.73028	4.1835	2.89885	6.7788	4.74737
ENSMUSG00000020108	Ddit4	10:59949674-59951770	OK	45.1843	36.5775	-0.304865	-1.78112	0.00055	0.0170438	yes	45.871	44.9161	44.7659	36.2894	42.3815	31.3498
ENSMUSG00000027305	Ndufaf1	2:119655445-119662827	OK	24.1502	19.5505	-0.304828	-0.743711	0.165	0.810875	no	36.7037	15.2391	20.5077	15.7573	16.8276	29.8597
ENSMUSG00000074264	Amy1	3:113555709-113630149	OK	0.664831	0.538349	-0.304445	-0.204933	0.6914	0.999642	no	0.699481	0.690377	0.604635	0.304875	0.82687	0.716777
ENSMUSG00000046709	Mapk10	5:102907947-103211334	OK	4.50333	3.64689	-0.304327	-0.385805	0.4515	0.999642	no	3.49585	5.62411	4.39005	2.75781	4.8511	4.22083
ENSMUSG00000097055	Gm4419	12:21417910-21419803	OK	0.716574	0.580337	-0.304225	-0.690655	0.1985	0.875233	no	0.769143	0.728151	0.652428	0.493248	0.600181	0.734671
ENSMUSG00000097145	9230114K14Rik	5:52190671-52279034	OK	0.946814	0.766848	-0.30414	-0.539962	0.25645	0.940005	no	0.696362	0.957124	1.18696	0.61812	1.12632	0.70483
ENSMUSG00000041203	2310036O22Rik	8:85026822-85030286	OK	201.706	163.409	-0.303767	-1.8333	0.0004	0.0129039	yes	220.331	202.706	182.082	132.058	209.609	179.911
ENSMUSG00000057880	Abat	16:8513428-8621568	OK	10.503	8.50999	-0.30357	-1.54586	0.00265	0.058438	no	9.88753	10.8766	10.7448	7.61493	9.29328	9.51684
ENSMUSG00000097628	Gm2383	1:12565576-12566383	OK	0.313801	0.254258	-0.303557	-0.360605	0.4688	0.999642	no	0.349635	0.34212	0.249646	0.241096	0.319098	0.21574
ENSMUSG00000039232	Stx11	10:12939982-12964259	OK	0.573868	0.465084	-0.303228	-0.700071	0.18845	0.86126	no	0.570165	0.652973	0.498467	0.401163	0.538558	0.519453
ENSMUSG00000020393	Kremen1	11:5191551-5261558	OK	9.12188	7.39288	-0.303196	-1.68214	0.0013	0.0339748	yes	9.34479	8.45928	9.56157	7.10731	7.25663	8.10026
ENSMUSG00000017897	Eya2	2:165595031-165771727	OK	45.1347	36.581	-0.303141	-0.645383	0.2117	0.894286	no	51.6389	52.8337	30.9314	34.7941	39.5205	37.2154
ENSMUSG00000073415	Gm10501	17:34972702-34981788	OK	2.79104	2.26243	-0.30293	-1.05578	0.0532	0.47065	no	2.7743	2.9246	2.67422	2.07924	2.77607	2.11516
ENSMUSG00000036305	Rpl39-ps	15:102634981-102635336	OK	57.4965	46.6148	-0.302687	-0.395202	0.4404	0.999642	no	49.0478	59.397	64.0446	48.6909	41.5185	47.5587
ENSMUSG00000080928	Hmgb1-ps6	16:31962505-32003287	OK	0.426421	0.345728	-0.302641	-0.0991407	0.88675	0.999642	no	0.340778	0.0625261	0.875959	0.235017	0.408207	0.504672
ENSMUSG00000039607	Rbms3	9:116572745-117629913	OK	4.00233	3.24517	-0.302548	-0.836397	0.1092	0.677048	no	3.94191	3.45012	4.61497	3.12	3.41356	3.32712
ENSMUSG00000074210	E130208F15Rik	7:30321405-30323895	OK	0.397394	0.322226	-0.302498	-0.229459	0.67275	0.999642	no	0.490965	0.287121	0.414097	0.285653	0.393824	0.323773
ENSMUSG00000008540	Mgst1	6:138140315-138156755	OK	42.8339	34.7365	-0.302299	-1.32335	0.01495	0.20629	no	38.7947	41.7782	47.9288	35.3587	30.1647	38.064
ENSMUSG00000020268	Lyrm7	11:54826865-54860916	OK	1.87197	1.51852	-0.301887	-0.249452	0.6064	0.999642	no	1.9656	1.59426	2.05605	0.91616	2.05414	2.18763
ENSMUSG00000035104	Eva1a	6:82041042-82093099	OK	4.10071	3.3266	-0.301826	-1.0485	0.04705	0.432435	no	3.30208	4.66742	4.33264	2.62083	4.08605	3.97868
ENSMUSG00000040451	Sgms1	19:32122726-32391184	OK	7.81948	6.34409	-0.30166	-0.503321	0.3204	0.996056	no	6.21421	9.23295	8.01129	6.51229	6.55255	5.79923
ENSMUSG00000028188	Spata1	3:146449794-146499753	OK	3.63148	2.94645	-0.30158	-0.41177	0.44075	0.999642	no	3.91798	3.56698	3.40949	3.15556	2.80913	2.66556
ENSMUSG00000000290	Itgb2	10:77530251-77565708	OK	0.343379	0.278635	-0.301423	-0.255502	0.55435	0.999642	no	0.287653	0.187155	0.555329	0.353298	0.209079	0.198866
ENSMUSG00000030732	Chrdl2	7:100006171-100034728	OK	0.304107	0.246788	-0.301309	-0.341764	0.4818	0.999642	no	0.402305	0.21769	0.292325	0.245179	0.179178	0.317613
ENSMUSG00000106928	Gm43860	5:35551259-35553964	OK	1.12512	0.9131	-0.301236	-0.890702	0.10015	0.655639	no	1.27611	1.14654	0.952708	0.922021	0.953779	0.854578
ENSMUSG00000038717	Atp5l	9:44913249-44920742	OK	78.1241	63.4071	-0.301123	-1.51057	0.00595	0.106475	no	68.8238	71.3208	94.2277	63.3917	53.7018	73.1432
ENSMUSG00000066829	Zfp810	9:22276747-22307638	OK	9.69898	7.8721	-0.301084	-1.57725	0.0036	0.0734089	no	9.50701	9.76723	9.8227	7.49718	8.53812	7.95592
ENSMUSG00000018012	Rac3	11:120721469-120723969	OK	27.4261	22.2614	-0.301003	-1.22404	0.0248	0.287051	no	26.8527	24.3516	31.0739	21.0021	24.9485	22.0928
ENSMUSG00000067724	Gbx1	5:24502756-24527202	OK	0.322429	0.261722	-0.300947	-0.666703	0.2178	0.897699	no	0.21526	0.300152	0.451876	0.170701	0.338892	0.366595
ENSMUSG00000022359	Wdyhv1	15:58141435-58158652	OK	17.2121	13.9721	-0.300873	-1.44099	0.00655	0.114241	no	17.6406	14.801	19.1946	14.4714	13.2236	13.7221
ENSMUSG00000078308	Gm7293	9:51621424-51624874	OK	0.330456	0.268255	-0.300849	-0.677884	0.2109	0.892731	no	0.274761	0.382058	0.334547	0.299157	0.185598	0.289109
ENSMUSG00000039706	Ldb2	5:44472131-44799680	OK	19.2432	15.6213	-0.300827	-0.985681	0.06445	0.520294	no	17.0655	21.6048	19.0592	15.5672	17.0407	14.3102
ENSMUSG00000035215	Lsm7	10:80852824-80855209	OK	2.63726	2.14093	-0.300807	-0.59435	0.26985	0.953719	no	3.00787	1.94772	2.95621	2.47064	1.36249	2.25993
ENSMUSG00000032051	Fdx1	9:51943306-51963533	OK	22.7323	18.4572	-0.300558	-1.3543	0.01245	0.182464	no	23.858	21.2384	23.1005	15.7508	21.0176	21.3097
ENSMUSG00000091144	Phf11c	14:59380832-59395381	OK	0.501879	0.407563	-0.300315	-0.764146	0.1572	0.793058	no	0.526372	0.571504	0.40776	0.365454	0.362767	0.536578
ENSMUSG00000072774	Zfp951	5:104813168-104860070	OK	1.0969	0.890899	-0.300101	-0.689805	0.19375	0.86862	no	0.949634	1.20938	1.13169	0.861064	1.01284	0.828623
ENSMUSG00000091510	Mtag2	7:45339121-45370583	OK	0.488118	0.396464	-0.300039	-0.154791	0.7609	0.999642	no	0.411607	0.302069	0.750677	0.378439	0.422614	0.406365
ENSMUSG00000049807	Arhgap23	11:97415532-97502402	OK	5.27927	4.28809	-0.300003	-1.41731	0.00645	0.113335	no	5.44746	5.20891	5.18144	3.97144	4.59876	4.61072
ENSMUSG00000079523	Tmsb10	6:72957346-72958748	OK	1623.32	1318.57	-0.299972	-1.75673	0.0013	0.0339748	yes	1600.34	1467.91	1801.71	1305.85	1290.26	1372.32
ENSMUSG00000024521	Pmaip1	18:66458603-66465550	OK	5.27637	4.28586	-0.299961	-1.29236	0.0173	0.22535	no	5.42952	4.49591	5.90368	2.93225	5.38725	5.89168
ENSMUSG00000023484	Prph	15:99055173-99058978	OK	1.27775	1.03796	-0.299852	-0.80868	0.1342	0.740398	no	1.91043	0.968506	0.954313	0.858451	1.30281	1.13214
ENSMUSG00000005357	Slc1a6	10:78780495-78814825	OK	0.747372	0.607149	-0.299777	-0.728121	0.1725	0.828247	no	0.734386	0.835831	0.671899	0.463491	0.741246	0.760366
ENSMUSG00000054626	Xlr	X:53777117-53797706	OK	0.385554	0.313294	-0.299414	-0.420255	0.4134	0.999642	no	0.180287	0.165386	0.810987	0.214101	0.353145	0.471829
ENSMUSG00000005628	Tmod4	3:95124475-95129209	OK	2.58966	2.10469	-0.299159	-0.435351	0.38445	0.999642	no	2.44499	3.32124	2.00276	2.13151	2.46835	1.68738
ENSMUSG00000002416	Ndufb2	6:39573872-39725463	OK	135.091	109.792	-0.299154	-0.958414	0.0762	0.56617	no	128.094	125.7	151.48	98.0403	119.711	123.378
ENSMUSG00000037395	Rcor3	1:191997204-192151026	OK	8.06073	6.55205	-0.298964	-0.657764	0.1928	0.868369	no	9.09995	7.36841	7.71382	5.51174	7.85686	7.32784
ENSMUSG00000056679	Gpr173	X:152343597-152416698	OK	8.3982	6.82641	-0.298952	-0.971577	0.07115	0.548639	no	8.3189	7.68616	9.18954	6.56914	6.79539	7.37199
ENSMUSG00000048856	Slc25a47	12:108851128-108856814	OK	3.70718	3.01343	-0.298915	-1.0272	0.0558	0.481027	no	4.26481	3.6995	3.15722	2.34681	3.83589	3.5242
ENSMUSG00000056267	Cep70	9:99241850-99304675	OK	15.8185	12.8584	-0.2989	-0.903673	0.08475	0.601295	no	14.6564	17.6846	15.1146	10.9526	15.495	14.0335
ENSMUSG00000048280	Zfp738	13:67667436-67687071	OK	3.07511	2.4998	-0.298827	-0.831083	0.11085	0.682157	no	2.76488	3.17733	3.28312	2.2614	2.52855	2.94783
ENSMUSG00000038729	Akap2	4:57434246-57896984	OK	8.32199	6.766	-0.298625	-0.742786	0.11975	0.701885	no	9.05971	8.3966	7.50968	6.20639	6.94789	7.70334
ENSMUSG00000001995	Sipa1l2	8:125418062-125569808	OK	7.69047	6.25268	-0.298596	-1.6851	0.0016	0.0398	yes	7.33412	8.05681	7.68048	5.54753	7.00939	6.90628
ENSMUSG00000021381	Barx1	13:48662997-48666507	OK	74.6859	60.7317	-0.298386	-1.76783	0.0008	0.0233044	yes	72.6351	77.0631	74.3596	49.004	78.8495	66.0695
ENSMUSG00000028555	Ttc39a	4:109406622-109444745	OK	3.1947	2.59782	-0.298376	-0.74263	0.1455	0.766334	no	2.85204	3.87865	2.85341	2.66073	2.96389	2.10595
ENSMUSG00000102112	1810041H14Rik	14:121876724-122021034	OK	1.99597	1.62306	-0.298371	-0.142987	0.81345	0.999642	no	1.33101	2.23827	2.41863	1.60223	2.14052	1.14725
ENSMUSG00000042644	Itpr3	17:27057303-27122223	OK	1.17511	0.955786	-0.298031	-1.22626	0.0214	0.260091	no	1.01539	1.35602	1.15391	0.876143	1.09742	0.973443
ENSMUSG00000083394	Gm11703	11:115724325-115724808	OK	1.23892	1.00785	-0.297806	-0.465882	0.3735	0.999642	no	1.08855	1.01394	1.61427	1.38577	0.515842	0.744014
ENSMUSG00000100213	Gm28151	1:46807543-46892852	OK	2.04195	1.66128	-0.297647	-0.155675	0.7468	0.999642	no	2.22753	2.24489	1.65341	1.55766	1.57842	1.95138
ENSMUSG00000082196	Gm14231	2:156789811-156790403	OK	0.658435	0.535884	-0.297121	-0.418799	0.4303	0.999642	no	0.602968	0.597383	0.774954	0.56131	0.619093	0.401821
ENSMUSG00000021719	Rgs7bp	13:104947152-105054930	OK	0.319658	0.260209	-0.296858	-0.777081	0.1456	0.766372	no	0.304704	0.289476	0.364793	0.250409	0.312853	0.227164
ENSMUSG00000099624	Gm7889	1:93975352-93985816	OK	0.533234	0.434065	-0.296855	-0.499176	0.3543	0.999642	no	0.652743	0.547469	0.399489	0.385808	0.4468	0.517847
ENSMUSG00000104043	Gm6525	3:84160438-84306877	OK	0.523939	0.426549	-0.296685	-0.147722	0.80955	0.999642	no	0.596664	0.500434	0.474718	0.352662	0.49596	0.504915
ENSMUSG00000072294	Klf12	14:99874485-100149764	OK	5.4885	4.46852	-0.296615	-1.18294	0.0303	0.326888	no	5.19767	5.51847	5.74937	3.99543	4.70969	5.17355
ENSMUSG00000025185	Loxl4	19:42593981-42612813	OK	0.262266	0.213545	-0.296488	-0.289955	0.4443	0.999642	no	0.222385	0.248583	0.31583	0.19696	0.261093	0.199169
ENSMUSG00000036782	Klhl13	X:23219270-23365082	OK	38.0558	30.9899	-0.296316	-0.93648	0.0764	0.566891	no	36.5282	36.4367	41.2026	29.1556	31.7095	33.9392
ENSMUSG00000036006	Fam65b	13:24582188-24733816	OK	0.798458	0.650317	-0.296075	-0.499689	0.24605	0.931559	no	0.700984	0.748626	0.945764	0.513944	0.73813	0.835248
ENSMUSG00000110360	RP23-67F4.3	7:101663632-101795506	OK	5.8264	4.74587	-0.295932	-0.197979	0.70945	0.999642	no	5.92632	4.72412	6.82878	3.80482	5.24559	6.12826
ENSMUSG00000069633	Pex11g	8:3457104-3467680	OK	2.1416	1.74446	-0.295903	-0.649492	0.22165	0.900743	no	2.01374	2.79695	1.6141	1.51692	2.227	1.71702
ENSMUSG00000022244	Amacr	15:10981755-10996624	OK	4.51321	3.6769	-0.295662	-1.22968	0.02305	0.273307	no	4.69135	4.51062	4.33766	3.94136	3.51607	3.30882
ENSMUSG00000085741	5430405H02Rik	2:156840006-156862963	OK	3.73331	3.04188	-0.295495	-0.286845	0.62785	0.999642	no	3.61878	3.98615	3.595	2.66156	3.1669	3.67749
ENSMUSG00000032643	Fhl3	4:124700700-124708611	OK	16.8101	13.6975	-0.295417	-1.31563	0.01595	0.21401	no	15.7114	18.3022	16.4167	12.3645	15.5438	14.5172
ENSMUSG00000027186	Elf5	2:103411687-103450989	OK	0.660417	0.538133	-0.295414	-0.427151	0.37465	0.999642	no	0.54939	0.457014	0.974846	0.212666	0.667424	1.05977
ENSMUSG00000068859	Sp9	2:73271924-73337818	OK	0.968279	0.789019	-0.295363	-0.290833	0.5077	0.999642	no	0.914955	0.929262	1.06062	0.423475	1.10868	1.20045
ENSMUSG00000024845	Tmem134	19:4125933-4132307	OK	60.999	49.7187	-0.294996	-1.26827	0.01745	0.226411	no	59.6236	56.9149	66.4584	47.0452	52.9884	51.7961
ENSMUSG00000040896	Kcnd3	3:105441594-105674002	OK	0.400327	0.326301	-0.294975	-0.307357	0.42335	0.999642	no	0.426594	0.389188	0.3852	0.30808	0.358121	0.330924
ENSMUSG00000061477	Rps7	12:28630846-28635953	OK	106.075	86.463	-0.294927	-1.74173	0.00145	0.0366203	yes	86.4095	102.176	129.639	87.4881	87.3853	83.4906
ENSMUSG00000061390	Gm7866	9:72174579-72174958	OK	0.697648	0.568718	-0.294785	-0.272714	0.65265	0.999642	no	0.531681	0.877928	0.683335	0.137486	0.81885	1.18105
ENSMUSG00000032344	Mb21d1	9:78427506-78443237	OK	0.397433	0.324031	-0.294577	-0.666657	0.2143	0.894775	no	0.361173	0.459051	0.372074	0.239079	0.464957	0.353011
ENSMUSG00000000253	Gmpr	13:45507443-45546382	OK	7.80079	6.36055	-0.294468	-1.06612	0.04555	0.42362	no	6.86969	8.72183	7.81085	6.1991	7.07687	5.96715
ENSMUSG00000083863	Gm13341	2:22227502-22618252	OK	4.8854	3.98381	-0.294328	-0.577312	0.2813	0.963949	no	5.0521	3.30383	6.30026	4.34607	2.46521	4.77789
ENSMUSG00000048612	Myof	19:37899035-38043577	OK	0.74443	0.607091	-0.294223	-1.01633	0.05665	0.486501	no	0.54175	0.907681	0.783857	0.588552	0.664687	0.586571
ENSMUSG00000072980	Oip5	2:119609511-119651244	OK	29.2563	23.8609	-0.294099	-0.663072	0.21985	0.898239	no	23.4767	31.8658	32.4264	22.0455	26.6042	24.7481
ENSMUSG00000106895	Gm4754	5:41342122-41342931	OK	0.275124	0.224415	-0.293916	-0.300474	0.5692	0.999642	no	0.271042	0.255744	0.298587	0.240301	0.159023	0.258034
ENSMUSG00000032679	Cd59a	2:104095800-104115354	OK	14.4717	11.8046	-0.293885	-1.17825	0.0282	0.311558	no	13.3848	15.4349	14.5953	11.6871	12.18	11.6641
ENSMUSG00000087496	Gm13523	2:32873754-32876001	OK	0.856388	0.698646	-0.293703	-0.395159	0.45825	0.999642	no	0.575873	0.724494	1.2688	0.595653	0.506806	1.09647
ENSMUSG00000024256	Adcyap1	17:93199421-93205485	OK	0.460947	0.376135	-0.293351	-0.616542	0.26105	0.94308	no	0.610237	0.356445	0.416158	0.270513	0.396393	0.567119
ENSMUSG00000030035	Wbp1	6:83119043-83121559	OK	164.455	134.198	-0.29333	-1.20753	0.02415	0.282497	no	151.747	145.097	196.522	126.971	142.515	140.335
ENSMUSG00000020654	Adcy3	12:4133102-4240123	OK	4.09017	3.33849	-0.292961	-0.524102	0.22	0.898239	no	4.82956	3.87371	3.56722	3.48086	3.23213	3.16014
ENSMUSG00000039646	Vasn	16:4626132-4707695	OK	9.69658	7.91574	-0.292751	-0.775879	0.1439	0.762669	no	9.93255	9.37901	9.77818	7.12965	8.9039	8.49978
ENSMUSG00000097032	4930539J05Rik	3:135436208-135468198	OK	0.495814	0.404822	-0.292511	-0.0439621	0.7968	0.999642	no	0.409751	0.250313	0.827378	0.338565	0.544218	0.397941
ENSMUSG00000084314	Rps15a-ps3	4:150825732-150868892	OK	11.411	9.31731	-0.29244	-0.365609	0.48805	0.999642	no	10.1236	11.4123	12.6971	8.957	10.1437	9.21157
ENSMUSG00000003849	Nqo1	8:107388224-107403206	OK	4.98068	4.06689	-0.292418	-1.08369	0.0417	0.403491	no	4.53819	4.86174	5.54212	3.99265	4.28465	3.9976
ENSMUSG00000086468	Etaa1os	11:17953969-17959578	OK	2.40302	1.96229	-0.29231	-0.496146	0.361	0.999642	no	2.48038	1.7459	2.98279	1.78923	2.08757	2.18315
ENSMUSG00000106797	Gm42936	5:36490603-36696024	OK	1.20632	0.9853	-0.291981	-0.0976804	0.89755	0.999642	no	0.898539	0.997546	1.72288	0.96629	0.453858	1.55476
ENSMUSG00000032252	Glce	9:62057247-62122655	OK	13.9197	11.37	-0.291891	-1.10154	0.0097	0.153169	no	13.281	13.568	14.91	10.3696	12.238	12.5027
ENSMUSG00000057137	Tmem140	6:34863145-34878060	OK	0.628926	0.513743	-0.291842	-0.118388	0.77145	0.999642	no	0.23592	0.534194	1.11666	0.558779	0.676643	0.260773
ENSMUSG00000054191	Klf1	8:84901927-84905291	OK	4.18354	3.41749	-0.291787	-1.03318	0.0541	0.474732	no	4.1746	4.42023	3.9558	3.42146	3.48711	3.33994
ENSMUSG00000025927	Tfap2b	1:19208913-19238576	OK	16.8058	13.7289	-0.291745	-0.854606	0.10355	0.666018	no	18.4617	14.7533	17.2024	14.3663	12.9163	13.2666
ENSMUSG00000041237	Pklr	3:89136141-89160196	OK	2.99631	2.44782	-0.291688	-0.44326	0.34475	0.999642	no	2.68528	4.32449	1.97916	2.80278	2.09889	2.08684
ENSMUSG00000031673	Cdh11	8:102632094-102785642	OK	82.8586	67.6964	-0.291572	-0.873531	0.09965	0.653921	no	73.8675	87.6732	87.0352	65.8012	73.4331	65.7503
ENSMUSG00000045055	Rpsa-ps2	10:128776741-128777251	OK	3.09026	2.52478	-0.291569	-0.633542	0.2397	0.927057	no	3.28435	2.35426	3.63215	2.60712	2.50953	2.37534
ENSMUSG00000001128	Cfp	X:20925453-20931555	OK	4.33963	3.54621	-0.291295	-0.627961	0.2334	0.918048	no	4.65207	4.57277	3.79407	3.70431	3.06914	3.7071
ENSMUSG00000030301	Ccdc91	6:147438361-147632612	OK	13.2704	10.8446	-0.291243	-1.31926	0.00655	0.114241	no	15.258	12.6412	11.9121	10.5699	11.3774	10.8612
ENSMUSG00000040466	Blvrb	7:27447977-27466144	OK	23.4157	19.137	-0.291112	-1.12499	0.03815	0.379821	no	21.7688	27.5358	20.9426	20.3247	20.7621	15.1364
ENSMUSG00000003824	Syce2	8:84872110-84893921	OK	44.1118	36.0539	-0.291009	-0.960282	0.0749	0.561308	no	47.2127	40.7424	44.3803	36.2617	36.1697	35.5226
ENSMUSG00000029428	Stx2	5:128984556-129008574	OK	17.9101	14.6423	-0.290633	-0.764654	0.1526	0.782034	no	18.591	16.7127	18.4267	14.9024	15.9651	12.7992
ENSMUSG00000029335	Bmp3	5:98854414-98884396	OK	0.28074	0.229528	-0.29057	-0.650904	0.21285	0.894286	no	0.345164	0.187925	0.309133	0.183748	0.208986	0.341627
ENSMUSG00000023571	Fam132a	4:155962317-155966629	OK	8.70979	7.12102	-0.290555	-0.568598	0.2894	0.969188	no	5.90338	10.2918	9.93425	6.72398	6.39786	8.63826
ENSMUSG00000001518	Itfg2	6:128362966-128424931	OK	25.9711	21.234	-0.290532	-0.30756	0.5947	0.999642	no	28.1682	24.7222	25.0229	20.0154	23.5728	21.3325
ENSMUSG00000019846	Lama4	10:38965514-39110188	OK	5.54402	4.53407	-0.290125	-0.576883	0.2307	0.914221	no	4.83079	7.72849	4.07277	4.60672	4.35269	4.57015
ENSMUSG00000018459	Slc13a3	2:165405027-165473230	OK	0.569919	0.466105	-0.290102	-0.216727	0.6467	0.999642	no	0.666982	0.328824	0.713952	0.289019	0.531423	0.754961
ENSMUSG00000097863	1010001B22Rik	5:109995510-109996398	OK	1.36334	1.11511	-0.289958	-0.529299	0.3262	0.99935	no	0.911473	1.5385	1.64004	1.13134	1.18541	1.01235
ENSMUSG00000056737	Capg	6:72544390-72562983	OK	6.73642	5.51002	-0.289925	-0.766763	0.14045	0.755886	no	6.8226	6.4746	6.91207	4.95162	6.2112	5.92564
ENSMUSG00000020601	Trib2	12:15791726-15816877	OK	15.4782	12.6632	-0.289594	-1.64373	0.0017	0.0416601	yes	15.1706	14.9475	16.3165	11.1002	14.2883	14.1643
ENSMUSG00000040681	Hmgn1	16:96120617-96127729	OK	659.114	539.365	-0.289265	-0.4631	0.3855	0.999642	no	727.493	727.261	522.588	392.105	702.188	671.063
ENSMUSG00000051154	Commd3	2:18672383-18676231	OK	62.5486	51.2003	-0.288826	-1.55284	0.0043	0.0839517	no	59.6012	59.1778	68.8668	47.0104	55.1364	55.6438
ENSMUSG00000084910	C630043F03Rik	4:72201347-72215352	OK	5.5384	4.53356	-0.288825	-1.26278	0.0208	0.25524	no	4.87696	5.29258	6.44567	4.41136	4.3992	4.91233
ENSMUSG00000040139	9430038I01Rik	7:137375573-137410762	OK	11.1671	9.14126	-0.288794	-1.09385	0.04075	0.398265	no	11.2043	9.7462	12.5509	8.25369	10.0816	9.97605
ENSMUSG00000000435	Myf5	10:107482907-107486134	OK	1.23605	1.01223	-0.288204	-0.800737	0.1375	0.747858	no	1.58584	0.934719	1.1876	1.03327	0.858999	1.12338
ENSMUSG00000053216	Btn2a2	13:23477675-23488857	OK	0.516612	0.423293	-0.287423	-0.640005	0.21725	0.897475	no	0.498355	0.629722	0.42176	0.392208	0.511668	0.39709
ENSMUSG00000109956	RP24-156K15.4	8:91210569-91313262	OK	0.522443	0.42813	-0.287226	-0.237931	0.6503	0.999642	no	0.592042	0.423626	0.551662	0.413355	0.425513	0.460297
ENSMUSG00000097177	9330159M07Rik	9:88839163-88858870	OK	1.12093	0.918945	-0.286651	-0.447364	0.40105	0.999642	no	0.861754	1.18072	1.32033	0.81422	1.11778	0.929565
ENSMUSG00000109143	Gm10046	7:27765672-27770972	OK	19.0451	15.6149	-0.286501	-0.162949	0.7453	0.999642	no	22.7793	11.7604	22.5958	11.5939	1.96499	37.3067
ENSMUSG00000103793	Pcdhga6	18:36930183-37841873	OK	0.768553	0.63019	-0.286357	-0.150019	0.8193	0.999642	no	0.72373	0.797813	0.784114	0.432887	0.75351	0.901476
ENSMUSG00000102014	2900009J06Rik	1:127729412-127774092	OK	4.49055	3.68252	-0.286198	-0.623438	0.24345	0.930586	no	5.16729	4.26083	4.04353	3.97971	3.4911	3.27958
ENSMUSG00000045498	Pcdhb3	18:36930183-37841873	OK	0.309877	0.254131	-0.286125	-0.0888049	0.88565	0.999642	no	0.294784	0.281237	0.353609	0.237152	0.309394	0.232825
ENSMUSG00000059049	Frem1	4:82897919-83052339	OK	10.1071	8.28916	-0.286069	-0.680339	0.19795	0.874442	no	10.1617	10.3794	9.78015	7.2756	8.5966	10.0088
ENSMUSG00000025213	Kazald1	19:45075240-45079289	OK	1.19998	0.98422	-0.285963	-0.697918	0.1905	0.864172	no	1.06008	1.20742	1.33245	1.09326	0.900936	0.849429
ENSMUSG00000029097	Trmt44	5:35556202-35575070	OK	5.85183	4.80014	-0.285809	-0.42063	0.4154	0.999642	no	5.75816	5.62292	6.17439	3.72829	6.31614	5.42786
ENSMUSG00000058586	Serhl	15:83089505-83122801	OK	15.1845	12.4562	-0.285731	-0.289818	0.48495	0.999642	no	13.5759	16.499	15.4786	11.7847	15.06	11.1955
ENSMUSG00000054484	Tmem62	2:120977016-121007852	OK	2.15158	1.76553	-0.285302	-0.316805	0.5082	0.999642	no	2.52742	2.01793	1.9094	1.76772	1.26064	2.26603
ENSMUSG00000034473	Sec22a	16:35311130-35363918	OK	16.3577	13.423	-0.285261	-0.612805	0.2575	0.940005	no	11.9917	14.6955	22.3858	14.1355	14.102	11.3189
ENSMUSG00000079652	Fam71f2	6:29279592-29290680	OK	0.416483	0.34184	-0.284935	-0.319579	0.525	0.999642	no	0.149257	0.410024	0.690168	0.326991	0.481834	0.231546
ENSMUSG00000074281	Gm12522	3:108364910-108383741	OK	0.389569	0.319806	-0.284681	-0.60086	0.2667	0.951086	no	0.40947	0.381406	0.377831	0.336655	0.29106	0.314854
ENSMUSG00000026274	Pask	1:93305963-93373489	OK	16.5704	13.6046	-0.284516	-0.467008	0.2107	0.892731	no	16.5606	16.0587	17.0918	13.2137	14.1845	13.8063
ENSMUSG00000016206	H2-M3	17:37270219-37274484	OK	0.594453	0.488071	-0.284471	-0.575479	0.28525	0.967051	no	0.646212	0.648596	0.488549	0.4325	0.64398	0.443305
ENSMUSG00000034842	Art3	5:92331826-92414628	OK	0.654124	0.53707	-0.284452	-0.213209	0.57005	0.999642	no	0.782624	0.885757	0.293991	0.653438	0.468579	0.372828
ENSMUSG00000030498	Gas2	7:51860576-51994975	OK	19.1695	15.7405	-0.284333	-0.668395	0.19985	0.876412	no	16.7778	17.5983	23.1323	14.478	16.0638	17.9421
ENSMUSG00000081992	Gm13408	2:34406770-34624950	OK	3.49984	2.87399	-0.284235	-0.248914	0.6455	0.999642	no	3.39146	2.95198	4.15608	3.01847	2.8748	2.58421
ENSMUSG00000074793	Hspa12b	2:131127279-131146321	OK	8.35876	6.86557	-0.283909	-1.30463	0.01465	0.204198	no	8.41889	9.23877	7.41863	6.37929	7.65761	7.0461
ENSMUSG00000099094	Gm19569	9:77544958-77546467	OK	3.14628	2.58424	-0.283908	-0.880764	0.10285	0.664102	no	3.08583	3.31524	3.03778	2.4486	3.16011	2.27963
ENSMUSG00000026313	Hdac4	1:91928778-92195699	OK	6.39212	5.25034	-0.283884	-0.453091	0.34385	0.999642	no	4.28213	5.1644	9.72983	6.09309	4.46133	4.35384
ENSMUSG00000045104	Gm5514	19:21938078-21938384	OK	67.5425	55.4928	-0.283494	-1.06129	0.0468	0.431579	no	66.2752	64.4736	71.8787	69.0071	25.9982	57.9589
ENSMUSG00000020105	Lrig3	10:125966218-126015359	OK	16.6725	13.6984	-0.283466	-1.65419	0.00175	0.042507	yes	16.3254	16.836	16.8562	13.3701	14.3746	13.6789
ENSMUSG00000020085	Aifm2	10:61715262-61784147	OK	4.76073	3.91155	-0.283443	-0.211438	0.6569	0.999642	no	4.98084	5.31717	3.98417	3.36805	4.38352	4.52657
ENSMUSG00000101939	Gm28438	1:24612774-24613119	OK	3.61986	2.97469	-0.283194	-0.510476	0.33615	0.999642	no	4.09483	2.34399	4.42077	3.21897	2.18626	3.27458
ENSMUSG00000062510	Nsl1	1:191063011-191086474	OK	14.4846	11.9038	-0.283097	-0.801329	0.13175	0.73273	no	14.5279	14.988	13.938	11.1003	13.4123	12.0024
ENSMUSG00000061048	Cdh3	8:106510890-106557297	OK	13.2023	10.8508	-0.282983	-1.62625	0.0023	0.0526895	no	14.2577	12.3942	12.9549	10.4202	11.3237	11.239
ENSMUSG00000031150	Ccdc120	X:7731713-7750905	OK	25.0664	20.6025	-0.282934	-0.299762	0.57115	0.999642	no	19.6841	25.3679	30.1472	16.9466	29.9638	18.553
ENSMUSG00000083705	Gm8624	11:117420636-117421717	OK	7.6958	6.326	-0.282779	-0.878639	0.098	0.647725	no	9.7161	4.76595	8.60535	7.60246	2.99795	7.1011
ENSMUSG00000035165	Kcne3	7:100171415-100227207	OK	11.9236	9.80255	-0.282585	-0.84911	0.1081	0.674309	no	11.9779	12.8578	10.9349	8.72368	13.9597	7.8031
ENSMUSG00000070476	Fam217b	2:178414523-178424428	OK	2.64582	2.17523	-0.282549	-0.831705	0.06385	0.518491	no	2.73968	2.63795	2.55982	2.23367	1.7449	2.48867
ENSMUSG00000038212	Mfsd14b	13:65064662-65112982	OK	21.4739	17.6552	-0.282489	-1.02252	0.0574	0.488951	no	20.8944	21.4115	22.1157	16.9079	20.1442	16.6609
ENSMUSG00000033871	Ppargc1b	18:61298135-61400431	OK	0.428318	0.352279	-0.281964	-0.513785	0.25085	0.93511	no	0.421559	0.419149	0.444248	0.403998	0.31415	0.286971
ENSMUSG00000037892	Pcdh18	3:49743295-49757325	OK	28.5222	23.459	-0.281948	-1.31553	0.0056	0.102205	no	29.8882	28.199	27.4795	21.7829	24.9445	25.3255
ENSMUSG00000096847	Tmem151b	17:45523433-45549677	OK	6.3527	5.22508	-0.281916	-1.47309	0.00545	0.100131	no	6.53641	6.01657	6.50512	4.38885	6.40003	5.72259
ENSMUSG00000033488	BC026585	1:157458576-157492638	OK	5.61611	4.61939	-0.281869	-0.90903	0.08645	0.607356	no	5.03315	7.05474	4.76044	4.35734	4.65725	5.10564
ENSMUSG00000041423	Paqr6	3:88364583-88368541	OK	0.289632	0.238232	-0.281852	-0.295609	0.5139	0.999642	no	0.15185	0.379462	0.337585	0.327768	0.171957	0.125436
ENSMUSG00000049932	H2afx	9:44334693-44336077	OK	251.879	207.186	-0.281807	-1.69836	0.0013	0.0339748	yes	262.847	252.831	239.96	159.054	247.041	263.594
ENSMUSG00000013701	Timm23	14:32180161-32201898	OK	41.3725	34.0387	-0.281493	-1.08307	0.04335	0.411265	no	37.5527	43.2328	43.3319	28.6594	41.227	37.6092
ENSMUSG00000068303	Spr-ps1	6:85152620-85156223	OK	7.19781	5.92279	-0.281281	-0.853481	0.11665	0.695814	no	7.52038	6.39054	7.6825	5.65196	7.3302	5.05702
ENSMUSG00000021414	Fam217a	13:34909963-34919992	OK	0.313049	0.257621	-0.281137	-0.553958	0.30545	0.982466	no	0.353428	0.365481	0.220236	0.254789	0.175942	0.344963
ENSMUSG00000097750	Gm4673	7:30916982-30973464	OK	0.844798	0.695231	-0.281116	-0.155502	0.75215	0.999642	no	0.825956	0.962646	0.745794	0.680416	0.82633	0.59376
ENSMUSG00000048583	Igf2	7:142650765-142670356	OK	525.146	432.183	-0.281075	-1.02214	0.0534	0.471914	no	544.921	495.652	534.864	417.186	444.981	449.381
ENSMUSG00000106930	Gm6450	5:93003830-93004404	OK	0.442271	0.363992	-0.281027	-0.299126	0.5544	0.999642	no	0.189657	0.487148	0.650009	0.457732	0.259638	0.280863
ENSMUSG00000018451	6330403K07Rik	11:71031940-71033513	OK	71.5374	58.8798	-0.280925	-1.67813	0.00135	0.0349498	yes	65.6191	71.8545	77.1385	52.1131	64.6111	66.6819
ENSMUSG00000098318	Lockd	6:134928991-134956798	OK	15.4122	12.6873	-0.280692	-0.83225	0.1253	0.717359	no	14.1653	16.2449	15.8264	11.7194	12.1602	15.1501
ENSMUSG00000024411	Aqp4	18:15389393-15403684	OK	0.465294	0.383033	-0.280671	-0.783636	0.14745	0.77095	no	0.519716	0.418491	0.457674	0.378288	0.385389	0.390169
ENSMUSG00000027204	Fbn1	2:125300593-125507993	OK	2.24513	1.84824	-0.280643	-1.35177	0.01025	0.159566	no	1.8207	2.49107	2.42361	1.55377	2.11987	2.16557
ENSMUSG00000053181	A830005F24Rik	13:48513569-48514859	OK	1.51058	1.24362	-0.280557	-0.598361	0.26995	0.953719	no	1.56962	1.46204	1.50007	0.999098	1.32234	1.65394
ENSMUSG00000033715	Akr1c14	13:4035244-4090422	OK	0.356213	0.293263	-0.280546	-0.336645	0.4857	0.999642	no	0.210266	0.467994	0.390378	0.313983	0.311546	0.233538
ENSMUSG00000001542	Ell2	13:75707483-75772356	OK	4.47736	3.6862	-0.280515	-1.27717	0.0167	0.220139	no	4.30836	4.37501	4.74871	3.96276	3.36668	3.4526
ENSMUSG00000062980	Cped1	6:21985907-22256404	OK	19.5677	16.1102	-0.280503	-0.984899	0.06285	0.514672	no	17.5143	20.0926	21.0962	15.9491	18.0754	14.4672
ENSMUSG00000097165	2210008F06Rik	11:77489853-77491409	OK	2.38091	1.96048	-0.280303	-0.761956	0.1651	0.810875	no	2.05592	2.41016	2.67665	1.6018	2.02866	2.60967
ENSMUSG00000053783	1700016K19Rik	11:75999911-76003569	OK	0.539532	0.444289	-0.280208	-0.461683	0.38355	0.999642	no	0.42489	0.647622	0.546083	0.507097	0.436253	0.32671
ENSMUSG00000020018	Snrpf	10:93540631-93605245	OK	83.3889	68.6739	-0.280094	-1.6014	0.0025	0.0561803	no	86.0886	82.9515	81.1267	58.0973	77.223	81.2781
ENSMUSG00000071193	Gm4938	13:104918778-104919186	OK	1.07001	0.881226	-0.280043	-0.368011	0.50075	0.999642	no	1.02855	1.00644	1.17505	0.472835	1.05606	1.52318
ENSMUSG00000046413	Irx3os	8:91798524-91807539	OK	0.559546	0.460897	-0.279812	-0.201139	0.71895	0.999642	no	0.781626	0.442596	0.454415	0.474449	0.440017	0.454673
ENSMUSG00000032744	Heyl	4:123233555-123249875	OK	3.08118	2.53822	-0.279665	-0.918027	0.0431	0.409599	no	4.56832	2.24225	2.43296	2.88658	2.28287	2.09687
ENSMUSG00000086922	Gm13835	6:31093558-31218474	OK	1.1726	0.965982	-0.279641	-0.519704	0.33135	0.999642	no	1.16815	0.91086	1.43879	0.65448	1.14941	1.40555
ENSMUSG00000086016	1700084C06Rik	9:21074167-21128393	OK	0.38611	0.3181	-0.279533	-0.0535589	0.855	0.999642	no	0.300254	0.47218	0.385897	0.221834	0.352325	0.476407
ENSMUSG00000087022	9130024F11Rik	1:56793980-57050084	OK	2.92051	2.40636	-0.279367	-0.473224	0.3551	0.999642	no	2.92168	3.36883	2.47102	1.8843	2.70776	3.14909
ENSMUSG00000045679	Pqlc3	12:16988647-17000408	OK	2.55174	2.10281	-0.279167	-0.753256	0.1146	0.691374	no	2.59799	2.23494	2.82229	2.07873	1.93711	2.31665
ENSMUSG00000097979	Gm4691	6:128202149-128203276	OK	0.638088	0.52598	-0.278749	-0.489556	0.3396	0.999642	no	0.736146	0.648292	0.529827	0.578688	0.423267	0.523277
ENSMUSG00000000409	Lck	4:129548343-129573641	OK	11.4566	9.44607	-0.278393	-0.774076	0.15025	0.776495	no	9.50193	11.472	13.3959	9.19314	11.3628	8.03518
ENSMUSG00000028545	Bend5	4:110397660-111664324	OK	20.608	16.9939	-0.278191	-1.10248	0.039	0.385957	no	18.337	22.0208	21.4663	16.0619	17.6135	18.2381
ENSMUSG00000043556	Fbxl7	15:26543083-26895049	OK	4.05202	3.34142	-0.278179	-0.967941	0.0717	0.5498	no	3.81689	3.69426	4.64491	3.41396	3.19954	3.33822
ENSMUSG00000027004	Frzb	2:80411969-80447625	OK	34.4422	28.4127	-0.27764	-1.23428	0.0217	0.262386	no	34.9987	34.3369	33.9911	21.9553	37.2805	32.46
ENSMUSG00000060314	Zfp941	7:140807448-140898643	OK	1.58801	1.31006	-0.27759	-0.150085	0.66565	0.999642	no	1.31315	1.9675	1.48339	1.34354	1.49659	1.05657
ENSMUSG00000043153	Ispd	12:36381241-36689444	OK	2.40022	1.98043	-0.277353	-0.986946	0.063	0.515389	no	2.37882	2.21339	2.60845	2.23596	1.91906	1.53074
ENSMUSG00000033022	Cdo1	18:46713204-46728342	OK	27.6559	22.822	-0.277161	-1.50742	0.00365	0.0740627	no	25.3483	25.8593	31.76	20.8215	24.3008	25.3443
ENSMUSG00000086699	Gm16510	2:70618627-70618876	OK	0.75	0.618972	-0.277018	-0.158636	0.82325	0.999642	no	0	1.74165	0.508354	0.40912	1.21834	0.43931
ENSMUSG00000021534	1700001L19Rik	13:68597438-68614231	OK	0.396165	0.326976	-0.276916	-0.534497	0.3296	0.999642	no	0.351021	0.499114	0.338358	0.302565	0.345392	0.357382
ENSMUSG00000048967	Yjefn3	8:69887787-69903518	OK	1.52997	1.26283	-0.276834	-0.110912	0.80935	0.999642	no	1.37949	1.11407	2.09633	1.18534	1.67961	1.00105
ENSMUSG00000033152	Podxl2	6:88842557-88875044	OK	23.2423	19.1925	-0.27621	-1.32301	0.01155	0.171711	no	23.2761	22.4463	24.0046	15.8138	23.1195	22.0229
ENSMUSG00000028040	Efna4	3:89333389-89349996	OK	34.0075	28.0842	-0.276096	-1.27497	0.01815	0.231851	no	34.891	31.6895	35.4422	27.2714	28.8837	28.9103
ENSMUSG00000017132	Cyth1	11:118132018-118248592	OK	15.9106	13.1417	-0.275833	-0.487972	0.335	0.999642	no	13.3086	21.6144	12.8088	11.2033	14.3627	15.7976
ENSMUSG00000021699	Pde4d	13:108449947-109953461	OK	5.42628	4.48281	-0.27556	-1.04768	0.0443	0.417395	no	5.20603	5.80188	5.27091	4.13474	4.62702	5.03473
ENSMUSG00000086606	Gm13205	4:148804428-148954889	OK	1.24292	1.02682	-0.275542	-0.302731	0.5677	0.999642	no	1.30659	1.07874	1.34342	1.14875	0.939077	0.870721
ENSMUSG00000028329	Xpa	4:46038934-46196311	OK	20.2235	16.7078	-0.275517	-0.254661	0.5734	0.999642	no	22.2445	17.6524	20.7736	15.6718	16.0113	19.4761
ENSMUSG00000096956	Snhg18	15:32240564-32244662	OK	11.7156	9.68	-0.275356	-1.24697	0.0181	0.231391	no	10.7577	11.0568	13.3324	9.55653	9.22328	10.3837
ENSMUSG00000037994	Slc9b2	3:135307699-135345387	OK	2.81839	2.32869	-0.275354	-0.436915	0.43085	0.999642	no	2.31125	3.73275	2.41116	2.64618	2.16446	1.85793
ENSMUSG00000044876	Zfp444	7:6172225-6193811	OK	37.6233	31.0876	-0.275287	-0.821302	0.12395	0.712881	no	42.7694	32.9727	37.128	27.8119	32.5748	36.152
ENSMUSG00000034059	Ypel4	2:84734057-84738655	OK	2.09098	1.72781	-0.275235	-0.730302	0.17695	0.837445	no	1.87609	2.32178	2.07507	1.26785	2.28225	2.09329
ENSMUSG00000021069	Pygl	12:70190810-70234165	OK	4.6117	3.81095	-0.275149	-0.799706	0.0927	0.631653	no	4.36576	4.91694	4.55241	3.90966	3.70489	3.71958
ENSMUSG00000074527	Gm14296	2:176892508-176927809	OK	1.35423	1.1191	-0.275131	-0.635758	0.23205	0.91623	no	1.32276	1.07009	1.66982	0.988561	1.12156	1.37772
ENSMUSG00000107169	Gm43796	17:24163864-24221730	OK	0.380301	0.314293	-0.275031	-0.083916	0.911	0.999642	no	1.07978	0	0.0611256	0.529367	0	0.198438
ENSMUSG00000029815	Malsu1	6:49073794-49214957	OK	31.8622	26.3359	-0.274813	-0.231699	0.6678	0.999642	no	31.801	33.1264	30.6591	21.2476	34.4364	28.412
ENSMUSG00000005958	Ephb3	16:21204754-21223305	OK	19.713	16.2962	-0.274613	-1.39163	0.01	0.156559	no	20.2194	20.9496	17.97	14.8667	18.4674	16.9841
[truncated: 46,787 more rows]

## Sheet: Figure_7B
test_id	gene	locus	status	value_1	value_2	log2(fold_change)	fc	test_stat	p_value	q_value	significant	CTRL_1	CTRL_2	CTRL_3	ABC_1	ABC_2	ABC_3		ECT enr	MES enr
ENSMUSG00000069049	Eif2s3y	Y:1010542-1028847	OK	35.1163	0.0319175	-10.1036	-1100.24	-2.43479	0.0001	0.00392328	yes	31.3692	37.6131	36.3667	0.0148689	0.0819662	0.015966		1.14682	0.871975
ENSMUSG00000068457	Uty	Y:1096860-1245759	OK	10.9847	0.0125219	-9.77683	-877.241	-1.03656	5e-05	0.002075	yes	9.94635	11.01	11.9979	0.00899374	0.016071	0.016029		1.08108	0.924999
ENSMUSG00000102550	Gm8276	3:59431536-59433348	OK	10.4956	0.080507	-7.02646	-130.369	-9.54249	5e-05	0.002075	yes	15.5816	15.8677	0.0375019	0.0905439	0.0599188	0.0810212		1.14363	0.87441
ENSMUSG00000020159	Gabrp	11:33550780-33578959	OK	1.23261	0.034273	-5.1685	-35.9645	-1.92227	5e-05	0.002075	yes	0.686699	1.1087	1.90243	0.0157841	0.0235021	0.0820215		20.6299	0.0484734
ENSMUSG00000048087	Gm4737	16:46152996-46155077	OK	5.02519	0.187492	-4.74428	-26.8022	-9.77975	5e-05	0.002075	yes	0.287505	14.6274	0.160657	0.181014	0.179683	0.208256		0.726318	1.37681
ENSMUSG00000085582	3110099E03Rik	2:115493512-115527744	OK	2.37607	0.135871	-4.12827	-17.4877	-3.93662	5e-05	0.002075	yes	2.47747	2.12864	2.5221	0.178992	0.0786731	0.106825		0.120299	8.31261
ENSMUSG00000021604	Irx4	13:73260478-73269608	OK	1.6664	0.154945	-3.42691	-10.7548	-6.8159	5e-05	0.002075	yes	1.53003	1.50471	1.96445	0.211538	0.101063	0.0956409		112.896	0.00885773
ENSMUSG00000031535	Dkk4	8:22624042-22627547	OK	1.96304	0.200847	-3.28892	-9.7738	-5.70948	5e-05	0.002075	yes	1.79416	1.95181	2.14314	0.130997	0.260067	0.281327		182.96	0.00546569
ENSMUSG00000022996	Wnt10b	15:98771752-98778150	OK	0.841554	0.106457	-2.98278	-7.90508	-4.61508	5e-05	0.002075	yes	0.603453	0.906991	1.01422	0.0960243	0.121169	0.11261		50.7873	0.01969
ENSMUSG00000092837	Rpph1	14:50807448-50807767	OK	15.9771	2.25487	-2.82489	-7.0856	-4.69319	5e-05	0.002075	yes	1.18769	42.9273	3.81614	4.09495	0.609726	0.219856		0.347416	2.87839
ENSMUSG00000040680	Kremen2	17:23741199-23754065	OK	3.98316	0.584332	-2.76905	-6.81659	-6.40734	5e-05	0.002075	yes	3.62012	3.66088	4.66847	0.304634	0.869384	0.858674		148.902	0.00671584
ENSMUSG00000034486	Gbx2	1:89927955-89933290	OK	4.05554	0.602227	-2.75152	-6.73426	-5.91089	5e-05	0.002075	yes	3.75055	4.15419	4.26189	0.643304	0.661688	0.460611		0.0235905	42.3899
ENSMUSG00000000125	Wnt3	11:103774149-103817957	OK	2.0865	0.314081	-2.73188	-6.64321	-7.28247	5e-05	0.002075	yes	2.15732	1.78112	2.32106	0.219761	0.444682	0.37212		162.336	0.00616006
ENSMUSG00000061527	Krt5	15:101707069-101712891	OK	3.25282	0.516116	-2.65592	-6.30248	-7.08837	5e-05	0.002075	yes	1.81946	3.45955	4.47946	0.232189	0.812751	0.787335		113.473	0.00881264
ENSMUSG00000021508	Cxcl14	13:56288646-56296551	OK	18.0169	3.44994	-2.38471	-5.22239	-9.95081	5e-05	0.002075	yes	15.9395	15.6324	22.4788	2.2932	4.24024	4.97312		70.3129	0.0142221
ENSMUSG00000068122	Agtr2	X:21484543-21489164	OK	0.612762	0.119877	-2.35378	-5.11162	-1.63856	0.0008	0.0233044	yes	0.129583	0.452299	1.2564	0.0551906	0.140875	0.228251		0.426372	2.34537
ENSMUSG00000025105	Bnc1	7:81966671-81992618	OK	2.46354	0.497841	-2.30697	-4.94843	-7.75233	5e-05	0.002075	yes	2.2987	2.48392	2.60799	0.4646	0.504589	0.557576		5.25048	0.190459
ENSMUSG00000061535	C1qtnf7	5:43515537-43618803	OK	0.37257	0.0767909	-2.2785	-4.85173	-1.75088	0.00185	0.0444134	yes	0.195549	0.382562	0.539598	0.0449137	0.110915	0.106422		0.21317	4.69109
ENSMUSG00000025150	Cbr2	11:120729488-120732114	OK	3.11615	0.660804	-2.23747	-4.71569	-2.15427	5e-05	0.002075	yes	2.44872	4.06451	2.83522	0.48048	0.830413	0.851844		115.727	0.008641
ENSMUSG00000110451	Rn7sk	9:78175302-78175633	OK	49.7263	10.7456	-2.21026	-4.62759	-5.82402	5e-05	0.002075	yes	4.43072	138.103	6.6454	16.241	7.01554	3.48493		0.696566	1.43561
ENSMUSG00000054146	Krt15	11:100131757-100135928	OK	3.74254	0.813966	-2.20098	-4.59792	-4.54665	5e-05	0.002075	yes	3.2232	4.23907	3.76536	0.547315	1.13368	1.02756		113.41	0.00881756
ENSMUSG00000044177	Wfikkn2	11:94235955-94246005	OK	1.77848	0.388165	-2.1959	-4.58175	-3.60131	5e-05	0.002075	yes	1.15267	1.88315	2.29963	0.256548	0.543702	0.495863		0.274201	3.64695
ENSMUSG00000034226	Rhov	2:119269200-119271272	OK	0.733211	0.17298	-2.08362	-4.23869	-3.72982	5e-05	0.002075	yes	0.516431	0.757996	0.925205	0.178056	0.144611	0.191196		12.4643	0.0802293
ENSMUSG00000026167	Wnt10a	1:74791515-74804179	OK	0.481702	0.118938	-2.01792	-4.04999	-2.2516	0.00035	0.0114701	yes	0.424958	0.475434	0.544714	0.0321625	0.273285	0.138144		22.7903	0.0438783
ENSMUSG00000022330	Osr2	15:35296097-35303304	OK	3.34426	0.828664	-2.01283	-4.03573	-5.67218	5e-05	0.002075	yes	3.62924	2.53309	3.87047	0.607012	0.951394	1.14924		0.7151	1.39841
ENSMUSG00000020218	Wif1	10:121033959-121100650	OK	1.94496	0.489087	-1.99157	-3.9767	-4.6117	5e-05	0.002075	yes	1.60107	1.77986	2.45393	0.389848	0.53034	0.646313		1.08704	0.91993
ENSMUSG00000040055	Gjb6	14:57123302-57133611	OK	1.4827	0.403536	-1.87746	-3.67428	-2.62639	0.0008	0.0233044	yes	1.42419	1.3451	1.67881	0.311248	0.923103	0.0685428		37.1887	0.0268899
ENSMUSG00000074280	Gm6166	9:57483912-57484585	OK	122.22	33.531	-1.86591	-3.64498	-6.99605	5e-05	0.002075	yes	107.715	136.158	122.786	0.671176	132.172	0.609826		1.54069	0.649058
ENSMUSG00000034009	Rxfp1	3:79641610-79737880	OK	0.528817	0.145138	-1.86535	-3.64356	-3.43297	5e-05	0.002075	yes	0.405335	0.639248	0.541869	0.147797	0.168798	0.11616		3.76432	0.265652
ENSMUSG00000022218	Tgm1	14:55700008-55713492	OK	0.81628	0.225253	-1.85752	-3.62384	-4.13198	5e-05	0.002075	yes	0.681287	0.780379	0.987173	0.228547	0.198504	0.245413		10.2787	0.0972882
ENSMUSG00000018486	Wnt9b	11:103727363-103749821	OK	3.8608	1.11563	-1.79104	-3.46064	-7.03261	5e-05	0.002075	yes	3.62378	3.42011	4.53852	0.737268	1.44694	1.54104		263.159	0.00379999
ENSMUSG00000052951	C130021I20Rik	2:33641192-33646354	OK	3.79767	1.10643	-1.7792	-3.43236	-4.31165	5e-05	0.002075	yes	3.94196	3.58702	3.86402	1.14518	1.06855	1.0668		59.1891	0.016895
ENSMUSG00000001504	Irx2	13:72628819-72634198	OK	4.02257	1.17257	-1.77844	-3.43055	-2.81106	5e-05	0.002075	yes	4.40646	3.39994	4.2613	0.897402	1.19872	1.69676		14.0207	0.0713231
ENSMUSG00000086804	Gm43154	6:31605189-31922270	OK	0.388451	0.114324	-1.7646	-3.3978	-0.703872	0.00045	0.0142116	yes	0.437399	0.464087	0.263867	0.0832863	0.115988	0.174736		0.579654	1.72517
ENSMUSG00000056174	Col8a2	4:126286792-126314330	OK	9.82168	2.97628	-1.72246	-3.29999	-6.70564	5e-05	0.002075	yes	8.22567	9.79492	11.4445	1.92913	3.92915	4.11772		0.219009	4.56602
ENSMUSG00000049436	Upk1b	16:38773183-38800203	OK	0.597981	0.181798	-1.71776	-3.28925	-3.04214	5e-05	0.002075	yes	0.434711	0.511541	0.847691	0.108534	0.277037	0.233087		15.6088	0.0640663
ENSMUSG00000036169	Sostdc1	12:36314168-36318452	OK	8.94643	2.75564	-1.69892	-3.24658	-6.49808	5e-05	0.002075	yes	9.32604	7.02782	10.4854	2.22729	3.0984	3.46958		47.5356	0.0210369
ENSMUSG00000085873	Ttc39aos1	4:109403793-109406155	OK	1.21581	0.381651	-1.6716	-3.18568	-1.88011	0.0009	0.0254108	yes	1.01354	1.09585	1.53805	0.0818552	0.791571	0.571321		0.64677	1.54614
ENSMUSG00000091043	Glyatl3	17:40904740-40914350	OK	1.0169	0.327814	-1.63323	-3.10207	-2.57784	5e-05	0.002075	yes	0.980669	0.809655	1.26039	0.181134	0.287684	0.661304		38.1572	0.0262074
ENSMUSG00000046352	Gjb2	14:57098599-57104702	OK	2.65037	0.860126	-1.62357	-3.08137	-5.03186	5e-05	0.002075	yes	2.25917	2.32271	3.36923	0.903845	0.875317	0.757497		78.1202	0.0128008
ENSMUSG00000023886	Smoc2	17:14279505-14404790	OK	6.71856	2.22056	-1.59723	-3.02562	-6.49191	5e-05	0.002075	yes	5.50087	6.44868	8.20614	1.4594	2.75981	3.20362		0.773788	1.29234
ENSMUSG00000042367	Gjb3	4:127325234-127330844	OK	1.86445	0.625175	-1.57642	-2.98229	-3.94844	5e-05	0.002075	yes	1.97732	2.00109	1.61493	0.598715	0.679242	0.624028		162.532	0.00615263
ENSMUSG00000030217	Art4	6:136848450-136857733	OK	2.01381	0.696259	-1.53223	-2.89233	-4.52397	5e-05	0.002075	yes	1.88704	1.8986	2.25578	0.671607	0.833336	0.608485		12.7936	0.0781643
ENSMUSG00000069911	Fam196b	11:34226814-34783892	OK	1.35388	0.483329	-1.48602	-2.80115	-4.06705	5e-05	0.002075	yes	1.24183	1.30052	1.51929	0.457999	0.401311	0.616007		32.9525	0.0303468
ENSMUSG00000028860	Sytl1	4:133253089-133263113	OK	0.883504	0.321199	-1.45977	-2.75065	-1.5114	0.00095	0.0265952	yes	0.580109	0.56179	1.50861	0.123711	0.513948	0.523426		16.6883	0.0599221
ENSMUSG00000082815	Gm5678	16:93628096-93630451	OK	1.45168	0.535021	-1.44005	-2.7133	-2.77348	5e-05	0.002075	yes	0.797124	2.00068	1.55723	0	1.11308	1.027		1.02043	0.979983
ENSMUSG00000105039	Gm42637	5:125238313-125272815	OK	2.48182	0.924995	-1.42388	-2.68306	-3.03466	5e-05	0.002075	yes	2.13302	1.97974	3.33271	0.821947	0.987674	1.06841		0	0
ENSMUSG00000073802	Cdkn2b	4:89306288-89311032	OK	0.442608	0.165215	-1.42169	-2.67899	-2.11057	0.0013	0.0339748	yes	0.473393	0.347414	0.507017	0.0816089	0.344288	0.153354		3.47301	0.287935
ENSMUSG00000100210	Hist1h3f	13:23544464-23545312	OK	0.823024	0.313853	-1.39084	-2.62231	-2.07836	0.0008	0.0233044	yes	0.472947	1.48179	0.514332	0.301041	0.410888	0.242442		0.906774	1.10281
ENSMUSG00000038765	Lmx1b	2:33560964-33640511	OK	2.75356	1.05272	-1.38717	-2.61565	-2.84156	5e-05	0.002075	yes	2.71343	2.81277	2.73449	1.14775	0.797535	1.11786		25.2513	0.039602
ENSMUSG00000020871	Dlx4	11:95140446-95159047	OK	1.05146	0.402894	-1.38392	-2.60977	-2.4098	5e-05	0.002075	yes	1.24198	1.04714	0.865267	0.440276	0.350462	0.380564		1.20937	0.826879
ENSMUSG00000051627	Hist1h1e	13:23621754-23622502	OK	1.19186	0.463414	-1.36284	-2.57191	-2.21594	0.0002	0.00702851	yes	0.731863	2.51173	0.331982	0.356236	0.663031	0.478154		0.837401	1.19417
ENSMUSG00000020053	Igf1	10:87826376-87937042	OK	38.7478	15.2494	-1.34536	-2.54094	-3.82436	5e-05	0.002075	yes	34.5753	37.0549	44.6131	11.7187	17.7617	19.7985		0.0275657	36.277
ENSMUSG00000038370	Pcp4l1	1:171173261-171196268	OK	2.63614	1.04052	-1.34113	-2.5335	-3.78459	5e-05	0.002075	yes	2.75054	2.76455	2.39332	0.954227	0.982294	1.27132		3.13088	0.319399
ENSMUSG00000072476	Gm9008	6:76495431-76497784	OK	3.36735	1.34403	-1.32505	-2.50542	-3.55911	5e-05	0.002075	yes	0.12011	5.42101	4.56092	0.0903533	0.089689	5.10572		1.13304	0.882585
ENSMUSG00000004341	Gpx6	13:21312216-21319624	OK	1.22678	0.493493	-1.31377	-2.4859	-2.42331	5e-05	0.002075	yes	0.969513	0.943159	1.76765	0.583031	0.532445	0.275464		19.484	0.0513243
ENSMUSG00000086552	Dlx4os	11:95140446-95159047	OK	2.22012	0.896093	-1.30892	-2.47756	-3.18219	5e-05	0.002075	yes	2.31365	2.1578	2.18889	0.947278	0.940313	0.749502		0.526084	1.90084
ENSMUSG00000023078	Cxcl13	5:95956950-95961068	OK	6.54674	2.64694	-1.30645	-2.47332	-4.20967	5e-05	0.002075	yes	7.33602	6.4114	5.89281	1.69192	3.12994	4.07397		0.0165601	60.3862
ENSMUSG00000031384	Asb9	X:164506326-164539752	OK	1.02144	0.415486	-1.29773	-2.45842	-2.46192	5e-05	0.002075	yes	0.827474	0.883297	1.35354	0.285299	0.617893	0.473453		0.0884305	11.3083
ENSMUSG00000018986	Slfn3	11:83191329-83215154	OK	0.820397	0.334005	-1.29645	-2.45624	-2.69587	5e-05	0.002075	yes	0.596688	0.817052	1.04745	0.225799	0.254024	0.630399		0.0977093	10.2344
ENSMUSG00000060981	Hist1h4h	13:23531049-23531522	OK	1.61586	0.658441	-1.29518	-2.45408	-1.76745	0.0019	0.0451544	yes	0.434154	3.63224	0.781186	0.80832	0.534918	0.482205		1.03376	0.967346
ENSMUSG00000071847	Apcdd1	18:62922326-62953195	OK	17.1208	7.00272	-1.28976	-2.44487	-6.56177	5e-05	0.002075	yes	14.3441	17.6885	19.3299	6.17379	7.89734	7.76595		0.845851	1.18224
ENSMUSG00000091383	Hist1h2al	13:51202687-51203065	OK	2.96218	1.23198	-1.26568	-2.40441	-1.90493	0.00155	0.0386727	yes	1.87136	5.29722	1.71795	0.829558	1.78416	1.48462		1.34702	0.742381
ENSMUSG00000022096	Hr	14:70552211-70573548	OK	0.632562	0.267546	-1.24142	-2.36431	-1.51126	5e-05	0.002075	yes	0.706006	0.483539	0.708143	0.238997	0.291146	0.301045		21.8004	0.0458707
ENSMUSG00000035431	Sstr1	12:58211771-58214444	OK	0.288801	0.122271	-1.23999	-2.36197	-1.77857	0.0014	0.03574	yes	0.212512	0.2836	0.370291	0.0804473	0.159712	0.168478		0.171717	5.82353
ENSMUSG00000033508	Asprv1	6:86628163-86629710	OK	0.756035	0.321409	-1.23404	-2.35225	-2.45007	5e-05	0.002075	yes	0.838334	0.576784	0.852985	0.270978	0.394512	0.349169		17.9766	0.0556278
ENSMUSG00000057454	Lypd3	7:24631144-24641118	OK	0.674053	0.28708	-1.23141	-2.34796	-2.32345	0.00025	0.00851392	yes	0.422075	0.661203	0.938882	0.201495	0.366692	0.378637		37.5038	0.026664
ENSMUSG00000069273	Hist1h3e	13:23561533-23562369	OK	1.1477	0.488982	-1.23089	-2.34712	-2.19111	0.00045	0.0142116	yes	1.00088	1.63229	0.809936	0.421773	0.494795	0.617587		1.26083	0.793127
ENSMUSG00000074577	Fam65c	2:167980163-168011506	OK	0.754918	0.324751	-1.21699	-2.32461	-1.83186	0.00025	0.00851392	yes	0.856034	0.567214	0.841505	0.222923	0.361973	0.491185		0.423269	2.36257
ENSMUSG00000041120	Nbl1	4:139082283-139092993	OK	45.9741	20.4237	-1.17058	-2.25102	-5.65547	5e-05	0.002075	yes	43.6539	42.4455	51.8229	15.2322	25.3372	25.8932		0.181073	5.52263
ENSMUSG00000032011	Thy1	9:44043383-44048579	OK	0.746761	0.332158	-1.16878	-2.24821	-2.34536	5e-05	0.002075	yes	0.429033	0.708433	1.10282	0.174338	0.503437	0.476517		0.197078	5.07412
ENSMUSG00000028661	Epha8	4:136929418-136956816	OK	0.486907	0.217008	-1.1659	-2.24373	-2.90725	5e-05	0.002075	yes	0.530999	0.401151	0.52857	0.17231	0.245874	0.277538		1.35719	0.736816
ENSMUSG00000045410	Akr1e1	13:4590756-4609174	OK	13.5507	6.05798	-1.16146	-2.23684	-2.82917	5e-05	0.002075	yes	6.07031	7.46719	27.1147	4.82689	4.3907	10.1874		0.582347	1.71719
ENSMUSG00000027868	Tbx15	3:99240380-99354259	OK	3.03261	1.35701	-1.16013	-2.23478	-2.47656	5e-05	0.002075	yes	1.68247	3.41581	3.99956	1.06148	1.69959	1.60548		0.350232	2.85525
ENSMUSG00000060177	Klk1b22	7:44112672-44116922	OK	1.05589	0.475465	-1.15104	-2.22074	-1.99611	0.00085	0.024374	yes	1.00773	1.18856	0.971372	0.558396	0.665148	0.11992		0	0
ENSMUSG00000052565	Hist1h1d	13:23555086-23555830	OK	1.10493	0.500729	-1.14186	-2.20665	-1.88637	0.0012	0.0321238	yes	0.824007	2.10061	0.390173	0.493443	0.534343	0.481687		1.81395	0.551283
ENSMUSG00000097971	Gm26917	17:39843012-39846341	OK	16.2562	7.38602	-1.13812	-2.20094	-4.20253	5e-05	0.002075	yes	6.45493	36.5023	5.81122	7.06922	9.63749	5.76817		0.918658	1.08854
ENSMUSG00000028716	Pdzk1ip1	4:115088707-115093899	OK	5.19639	2.3662	-1.13494	-2.19609	-2.58072	5e-05	0.002075	yes	2.74962	5.45927	7.38028	2.07154	3.06902	2.25269		0.107697	9.28527
ENSMUSG00000035202	Lars2	9:123366939-123462664	OK	99.068	45.1545	-1.13355	-2.19398	-5.33544	5e-05	0.002075	yes	30.2444	232.437	34.5229	58.2747	30.4699	33.5988		0.84156	1.18827
ENSMUSG00000099465	Gm3830	8:105164586-105170367	OK	0.472543	0.215385	-1.13353	-2.19395	-1.99098	0.00055	0.0170438	yes	0.434707	0.68362	0.299303	0.160585	0.35069	0.189679		0.218342	4.57997
ENSMUSG00000053886	Sh2d4a	8:68276566-68347699	OK	0.27065	0.12365	-1.13017	-2.18885	-1.71067	0.00095	0.0265952	yes	0.25205	0.295961	0.26394	0.0868994	0.134181	0.186621		12.0964	0.0826694
ENSMUSG00000074206	Adh6b	3:138341774-138358861	OK	0.425174	0.196627	-1.11259	-2.16233	-1.87023	0.0011	0.029932	yes	0.542931	0.269061	0.463529	0.253113	0.193201	0.0870811		7.40848	0.13498
ENSMUSG00000048776	Pthlh	6:147252100-147264183	OK	0.604473	0.279681	-1.1119	-2.1613	-1.85984	0.00125	0.0331933	yes	0.611594	0.553741	0.648083	0.202689	0.447543	0.2658		42.917	0.0233008
ENSMUSG00000007805	Twist2	1:91798527-91848028	OK	29.6427	13.7336	-1.10997	-2.15841	-5.39679	5e-05	0.002075	yes	31.8101	27.5842	29.5339	12.1905	15.0324	15.521		0.0175189	57.0813
ENSMUSG00000017607	Tns4	11:99065677-99089306	OK	1.04645	0.484861	-1.10985	-2.15823	-1.57584	0.00085	0.024374	yes	1.03243	0.71541	1.3915	0.43747	0.606016	0.458486		5.79726	0.172495
ENSMUSG00000030762	Aqp8	7:123462290-123468004	OK	0.600305	0.279889	-1.10084	-2.1448	-1.94022	0.00045	0.0142116	yes	0.564269	0.696243	0.540401	0.208106	0.337862	0.365484		0.228317	4.37987
ENSMUSG00000091243	Vgll3	16:65815632-65863057	OK	2.15457	1.00563	-1.0993	-2.14251	-3.75432	5e-05	0.002075	yes	2.05494	1.80638	2.60238	0.981011	0.873327	1.18717		8.60676	0.116188
ENSMUSG00000046318	Ccbe1	18:66045301-66319607	OK	1.39956	0.655962	-1.09329	-2.1336	-3.38106	5e-05	0.002075	yes	1.436	1.34697	1.4157	0.647478	0.642873	0.686018		1.6141	0.61954
ENSMUSG00000031736	Crnde	8:92326032-92356120	OK	10.4774	4.95073	-1.08157	-2.11634	-3.0307	5e-05	0.002075	yes	7.96052	11.7155	11.7562	4.99923	5.13173	4.67274		1.18326	0.84512
ENSMUSG00000097910	5033428I22Rik	8:57331691-57354580	OK	3.47605	1.6466	-1.07796	-2.11105	-2.64224	5e-05	0.002075	yes	3.30717	3.55619	3.56478	1.31853	1.7919	2.15744		0.0582755	17.1599
ENSMUSG00000037335	Hand1	11:57828704-57832818	OK	11.2585	5.36378	-1.06969	-2.09898	-1.92432	0.00015	0.00546921	yes	12.2269	14.2573	7.29133	6.60523	4.06878	4.17589		0.15661	6.38529
ENSMUSG00000025328	Padi3	4:140785364-140810648	OK	0.491197	0.234068	-1.06937	-2.09852	-2.3635	5e-05	0.002075	yes	0.5319	0.46842	0.473272	0.270852	0.17644	0.21813		11.3092	0.0884236
ENSMUSG00000031737	Irx5	8:92357624-92376286	OK	8.39671	4.02936	-1.05927	-2.08388	-4.70282	5e-05	0.002075	yes	8.62992	7.97032	8.58989	3.45814	4.66393	4.53723		2.46748	0.405272
ENSMUSG00000034584	Exph5	9:53301669-53377514	OK	0.607874	0.292246	-1.05659	-2.08001	-2.92115	5e-05	0.002075	yes	0.50077	0.633494	0.689358	0.30694	0.30584	0.249264		66.5719	0.0150214
ENSMUSG00000052305	Hbb-bs	7:103826533-103828096	OK	58.7421	28.3434	-1.05138	-2.07251	-4.83551	5e-05	0.002075	yes	31.2879	62.1889	82.7493	21.5416	45.2789	25.0116		0.0198877	50.2823
ENSMUSG00000073876	Gm13305	4:42158841-42168603	OK	19.3458	9.35716	-1.04788	-2.06749	-3.33956	5e-05	0.002075	yes	19.4822	15.9357	22.6195	11.9254	13.2301	0.347729		0.894629	1.11778
ENSMUSG00000047026	Acsm4	7:119690025-119714565	OK	0.444641	0.216269	-1.03981	-2.05596	-1.91238	0.0017	0.0416601	yes	0.385439	0.344743	0.603743	0.0747521	0.247342	0.468232		9.84576	0.101567
ENSMUSG00000020467	Efemp1	11:28853203-28926743	OK	3.88055	1.90184	-1.02886	-2.04041	-3.04043	5e-05	0.002075	yes	3.26581	4.30431	4.07153	1.71698	2.24057	1.93285		0.578113	1.72977
ENSMUSG00000021567	Nkd2	13:73818533-73847631	OK	11.3548	5.57858	-1.02533	-2.03542	-5.12101	5e-05	0.002075	yes	10.9666	11.4484	11.6493	5.33095	5.95616	5.69625		0.0778971	12.8375
ENSMUSG00000091697	Eif3s6-ps2	18:90311824-90312043	OK	76.5875	37.6439	-1.02469	-2.03452	-2.74552	5e-05	0.002075	yes	82.0473	121.735	25.9804	23.9837	69.5908	33.0174		1.136	0.880279
ENSMUSG00000024922	Ovol1	19:5512527-5560575	OK	0.535595	0.263364	-1.02408	-2.03366	-2.15252	0.0002	0.00702851	yes	0.478768	0.479125	0.648892	0.252108	0.259192	0.290049		41.4155	0.0241455
ENSMUSG00000075296	Aldh3b2	19:3972327-3981645	OK	0.343325	0.168835	-1.02396	-2.03349	-1.78606	0.00115	0.0310368	yes	0.169586	0.440041	0.420348	0.20047	0.0994981	0.174902		18.7136	0.0534371
ENSMUSG00000039062	Anpep	7:79821802-79861059	OK	4.1063	2.02628	-1.019	-2.02651	-2.35165	0.00015	0.00546921	yes	3.19705	5.14968	3.97217	1.93484	2.24899	1.98646		1.00162	0.998385
ENSMUSG00000031734	Irx3	8:91798524-91807539	OK	17.8262	8.83599	-1.01254	-2.01746	-5.31637	5e-05	0.002075	yes	17.9679	19.2202	16.2906	7.796	11.1395	8.61246		1.36457	0.732833
ENSMUSG00000039457	Ppl	16:5086290-5132481	OK	0.823488	0.408479	-1.01149	-2.01599	-3.23644	5e-05	0.002075	yes	0.776966	0.834023	0.859476	0.367841	0.408794	0.489438		67.5426	0.0148055
ENSMUSG00000009471	Myod1	7:46376473-46379099	OK	0.603218	0.300383	-1.00588	-2.00817	-1.97962	0.0012	0.0321238	yes	0.580497	0.592265	0.636893	0.117158	0.479725	0.48749		0.154431	6.47538
ENSMUSG00000004366	Sst	16:23889580-23890844	OK	15.7767	7.88488	-1.00064	-2.00089	-3.24923	5e-05	0.002075	yes	33.2292	5.80314	8.29784	7.84212	7.23711	8.61818		0.826898	1.20934
ENSMUSG00000039883	Lrrc17	5:21483846-21645634	OK	5.16314	2.58988	-0.995361	-1.99358	-3.76011	5e-05	0.002075	yes	5.07049	5.13935	5.27959	2.23269	2.57455	3.3196		0.0419161	23.8572
ENSMUSG00000037843	Vstm2l	2:157914652-157944719	OK	0.814321	0.410663	-0.987643	-1.98294	-1.88636	0.00165	0.0406762	yes	1.07244	0.512318	0.858207	0.146508	0.810256	0.53938		1.41237	0.70803
ENSMUSG00000031380	Vegfd	X:164373377-164402650	OK	3.42314	1.73162	-0.983195	-1.97684	-3.30148	5e-05	0.002075	yes	3.25552	3.20577	3.80812	1.39429	2.13225	2.00565		0.0457807	21.8432
ENSMUSG00000061482	Hist1h4d	13:23581597-23581990	OK	4.98675	2.52379	-0.982506	-1.97589	-1.93302	0.00055	0.0170438	yes	2.34152	9.76772	2.85101	2.67689	2.27761	2.46379		0.789103	1.26726
ENSMUSG00000028264	Spaca1	4:34024873-34050191	OK	0.70268	0.356364	-0.979517	-1.97181	-1.62073	0.00215	0.0499459	yes	0.413407	0.560898	1.13374	0.269981	0.324227	0.561265		0.558496	1.79052
ENSMUSG00000029765	Plxna4	6:32144267-32588192	OK	0.735071	0.376003	-0.96714	-1.95496	-3.43693	5e-05	0.002075	yes	0.691021	0.654642	0.859551	0.358336	0.361408	0.425932		3.93101	0.254388
ENSMUSG00000028441	1110017D15Rik	4:41505008-41517333	OK	3.30311	1.69483	-0.962687	-1.94894	-1.77636	0.002	0.047057	yes	2.99187	3.83375	3.08372	1.58925	1.9108	1.69002		0.0822769	12.1541
ENSMUSG00000026494	Kif26b	1:178529124-178939200	OK	5.65564	2.90935	-0.958994	-1.94395	-4.82796	5e-05	0.002075	yes	4.41964	6.02388	6.5234	2.2435	3.27417	3.87622		0.186323	5.36701
ENSMUSG00000006411	Nectin4	1:171370098-171388598	OK	2.7264	1.40359	-0.957878	-1.94245	-3.46484	5e-05	0.002075	yes	2.57261	2.54966	3.05692	1.07612	1.62769	1.83442		89.4846	0.0111751
ENSMUSG00000032420	Nt5e	9:88327196-88372092	OK	1.18218	0.60952	-0.955702	-1.93952	-2.96677	5e-05	0.002075	yes	1.15781	1.0837	1.30503	0.512331	0.71199	0.701426		36.4344	0.0274466
ENSMUSG00000041730	Prrxl1	14:32599406-32649246	OK	0.572835	0.298574	-0.940028	-1.91857	-1.90451	0.0003	0.00993006	yes	1.14142	0.205381	0.371705	0.215684	0.33805	0.42488		1.00663	0.993414
ENSMUSG00000032033	Barx2	9:31846043-31913462	OK	2.6719	1.39942	-0.933035	-1.90929	-2.94339	5e-05	0.002075	yes	2.95268	2.32796	2.73505	1.16936	1.51582	1.74314		27.5756	0.0362639
ENSMUSG00000071715	Ncf4	15:78244800-78262580	OK	3.73022	1.96071	-0.92788	-1.90248	-1.89147	0.00055	0.0170438	yes	2.88303	3.96195	4.34567	1.68798	2.76955	1.69734		0.054064	18.4966
ENSMUSG00000047686	Zcchc5	X:106837081-106840644	OK	1.20973	0.637087	-0.925117	-1.89884	-2.60244	5e-05	0.002075	yes	1.16316	1.28985	1.17616	0.318472	0.904484	1.00692		0.70317	1.42213
ENSMUSG00000050397	Foxl2	9:98955606-98956847	OK	3.37021	1.77736	-0.923106	-1.89619	-2.69274	5e-05	0.002075	yes	3.5953	3.78354	2.73179	1.33315	2.48418	1.95894		1.04376	0.958071
ENSMUSG00000086549	Gm13648	4:156034839-156059802	OK	1.13958	0.601914	-0.920877	-1.89327	-1.94638	0.00035	0.0114701	yes	1.09178	1.24062	1.08634	0.47357	0.795534	0.664983		14.8567	0.0673097
ENSMUSG00000036611	Eepd1	9:25481546-25604110	OK	6.94016	3.67419	-0.917543	-1.8889	-3.68291	5e-05	0.002075	yes	6.41885	7.45702	6.94461	3.50672	3.85482	3.82849		0.166661	6.00019
ENSMUSG00000031760	Mt3	8:94152606-94154146	OK	5.20019	2.75653	-0.91571	-1.8865	-2.16638	0.00015	0.00546921	yes	5.68229	6.29783	3.62045	2.15879	4.37078	2.33778		2.95543	0.338361
ENSMUSG00000036144	Meox2	12:37108539-37179534	OK	0.855047	0.456534	-0.905281	-1.87291	-2.22768	5e-05	0.002075	yes	0.82716	0.73084	1.00714	0.484073	0.44699	0.411001		2.1597	0.463027
ENSMUSG00000051048	P4ha3	7:100285519-100319699	OK	2.18417	1.1761	-0.893073	-1.85713	-2.27981	5e-05	0.002075	yes	1.46148	1.99226	3.09878	0.846491	1.5415	1.46993		2.22272	0.4499
ENSMUSG00000027869	Hsd3b6	3:98805503-98814443	OK	3.31567	1.78824	-0.890761	-1.85415	-2.61452	5e-05	0.002075	yes	2.93603	3.99662	3.01436	1.60006	2.31757	1.63527		0.0415869	24.0461
ENSMUSG00000034324	Tmem132c	5:127241807-127565793	OK	26.8508	14.5014	-0.888774	-1.8516	-4.63458	5e-05	0.002075	yes	25.4633	26.5098	28.5794	14.6662	13.7503	14.9229		0.587833	1.70116
ENSMUSG00000098557	Kctd12	14:102976580-102982637	OK	27.4273	14.8996	-0.880336	-1.8408	-5.23521	5e-05	0.002075	yes	25.3761	26.0183	30.8873	13.8851	14.8496	16.9786		0.0885491	11.2932
ENSMUSG00000027416	Otor	2:143078472-143081713	OK	1.39956	0.762495	-0.876178	-1.83551	-1.79653	0.00155	0.0386727	yes	1.13248	1.00425	2.06196	0.488074	1.13047	0.943364		0.142605	7.01235
ENSMUSG00000028825	Rhd	4:134864535-134896172	OK	4.03778	2.20175	-0.874911	-1.83389	-2.2499	5e-05	0.002075	yes	2.59636	4.44486	5.07213	1.83858	2.99028	2.13956		0.118264	8.45563
ENSMUSG00000000120	Ngfr	11:95568817-95587735	OK	9.5278	5.19599	-0.874745	-1.83368	-4.3997	5e-05	0.002075	yes	10.9895	8.33596	9.2579	4.4854	5.98364	5.82952		0.168032	5.95124
ENSMUSG00000060735	Rxfp3	15:11033716-11037991	OK	0.472199	0.260787	-0.856523	-1.81067	-2.11748	0.00025	0.00851392	yes	0.536218	0.539502	0.340877	0.155059	0.355198	0.377831		0.265532	3.76602
ENSMUSG00000000142	Axin2	11:108920348-108950783	OK	24.9422	13.7878	-0.855203	-1.80901	-3.78784	5e-05	0.002075	yes	24.4348	25.3279	25.064	14.0282	13.3761	13.7186		0.950816	1.05173
ENSMUSG00000041731	Pgm5	19:24683015-24861855	OK	2.01483	1.11861	-0.848947	-1.80119	-2.11862	5e-05	0.002075	yes	1.64388	2.04	2.3606	0.727875	1.46222	1.55648		0.154185	6.48573
ENSMUSG00000045545	Krt14	11:100203161-100207548	OK	11.4046	6.35757	-0.843064	-1.79386	-3.30507	5e-05	0.002075	yes	10.4334	10.4992	13.2811	5.41663	8.1716	6.42542		359.787	0.00277942
ENSMUSG00000006574	Slc4a1	11:102348823-102366203	OK	19.304	10.8167	-0.835633	-1.78464	-1.65301	0.00215	0.0499459	yes	13.5224	27.0698	17.3197	7.97826	14.5261	12.7843		0.0250246	39.9606
ENSMUSG00000049100	Pcdh10	3:45378397-45440956	OK	5.3664	3.01277	-0.832864	-1.78122	-1.73882	0.0011	0.029932	yes	5.36856	5.56013	5.1705	2.18611	3.23096	4.44789		0.429305	2.32935
ENSMUSG00000004655	Aqp1	6:55336431-55348555	OK	0.97867	0.552772	-0.824136	-1.77047	-2.18102	0.00015	0.00546921	yes	0.832916	0.746306	1.35679	0.510904	0.715974	0.473307		0.274987	3.63653
ENSMUSG00000052353	Cemip	7:83932856-84086502	OK	0.390128	0.22254	-0.809881	-1.75307	-1.74338	0.0007	0.0207948	yes	0.358898	0.448864	0.362623	0.123047	0.252268	0.3918		0.811241	1.23268
ENSMUSG00000042351	Grap2	15:80623504-80650559	OK	0.980721	0.560287	-0.807676	-1.75039	-2.28142	5e-05	0.002075	yes	0.738881	1.17196	1.03132	0.517724	0.579177	0.626523		0.102604	9.74617
ENSMUSG00000013584	Aldh1a2	9:71215788-71296243	OK	4.10665	2.35455	-0.802512	-1.74414	-2.93489	5e-05	0.002075	yes	3.53107	4.33847	4.45041	1.27243	3.20447	3.66885		0.0472417	21.1677
ENSMUSG00000053475	Tnfaip6	2:52038008-52056686	OK	24.1953	13.8981	-0.799838	-1.74091	-4.18309	5e-05	0.002075	yes	23.2717	23.3888	25.9256	12.0516	15.0017	16.4876		0.0162736	61.4492
ENSMUSG00000081683	Fzd10	5:128600843-128604093	OK	6.83603	3.94592	-0.792797	-1.73243	-3.69415	5e-05	0.002075	yes	6.47229	6.83643	7.19938	3.88924	4.24829	3.75691		2.64493	0.378082
ENSMUSG00000021876	Rnase4	14:51091076-51106151	OK	6.81	3.93142	-0.792604	-1.7322	-2.99878	5e-05	0.002075	yes	5.44277	6.8021	8.18513	3.58325	3.87624	4.68293		4.33229	0.230825
ENSMUSG00000015957	Wnt11	7:98835111-98855195	OK	1.57982	0.912122	-0.792465	-1.73203	-1.96362	0.0003	0.00993006	yes	1.38588	1.65827	1.69532	0.637423	1.42528	0.94836		0.47086	2.12377
ENSMUSG00000001119	Col6a1	10:76708791-76726168	OK	2.11627	1.22263	-0.791536	-1.73092	-2.88923	5e-05	0.002075	yes	1.86162	2.19522	2.29196	1.00952	1.62686	1.24461		0.47549	2.1031
ENSMUSG00000027737	Slc7a11	3:49892525-50443614	OK	0.805224	0.466372	-0.787909	-1.72657	-1.7931	5e-05	0.002075	yes	0.810971	0.848608	0.756091	0.429533	0.520708	0.485714		2.0887	0.478768
ENSMUSG00000074863	Platr25	13:62699405-62726689	OK	4.08266	2.36605	-0.787029	-1.72552	-2.19613	0.00015	0.00546921	yes	2.19304	4.69545	5.35947	2.04091	3.33239	2.04998		0.784828	1.27416
ENSMUSG00000052957	Gas1	13:60174404-60177365	OK	62.9969	36.5548	-0.785218	-1.72335	-4.78121	5e-05	0.002075	yes	67.1711	59.6344	62.1851	34.8756	40.3614	36.1067		0.715067	1.39847
ENSMUSG00000052187	Hbb-y	7:103851748-103853216	OK	5894.49	3426.22	-0.782751	-1.72041	-3.44861	5e-05	0.002075	yes	4222.52	7083.15	6377.8	3167.98	3983.52	3385.39		0.01455	68.7283
ENSMUSG00000035799	Twist1	12:33957670-33959817	OK	135.737	79.3826	-0.773925	-1.70992	-4.70843	5e-05	0.002075	yes	139.247	130.592	137.373	68.2692	90.2484	90.7435		0.0104675	95.5336
ENSMUSG00000060675	Pla2g16	19:7557458-7588545	OK	7.49068	4.39207	-0.770197	-1.7055	-2.51327	5e-05	0.002075	yes	6.52417	6.99142	8.95645	4.28369	4.54915	4.45175		0.508062	1.96826
ENSMUSG00000037188	Grhl3	4:135541887-135573630	OK	4.45415	2.61409	-0.76884	-1.7039	-3.10098	5e-05	0.002075	yes	4.23964	4.32729	4.79552	2.07525	3.1599	3.14596		195.54	0.00511405
ENSMUSG00000019851	Perp	10:18845070-18857073	OK	16.4881	9.71733	-0.762791	-1.69677	-3.79619	5e-05	0.002075	yes	15.484	14.5949	19.3853	8.43693	11.1855	10.81		260.699	0.00383584
ENSMUSG00000028364	Tnc	4:63959784-64149924	OK	1.34159	0.791787	-0.760762	-1.69439	-2.84303	5e-05	0.002075	yes	1.01826	1.37104	1.63547	0.552467	0.934416	1.1278		1.67494	0.597038
ENSMUSG00000021613	Hapln1	13:89540635-89611832	OK	8.58727	5.07321	-0.759302	-1.69267	-4.06855	5e-05	0.002075	yes	8.60367	8.09677	9.06137	5.92612	4.30758	4.13301		2.80803	0.356122
ENSMUSG00000031616	Ednra	8:77610859-77769682	OK	15.9328	9.43939	-0.755236	-1.68791	-4.19935	5e-05	0.002075	yes	15.4503	15.9793	16.3688	8.85732	9.65226	10.3907		0.0519072	19.2651
ENSMUSG00000021095	Gsc	12:104471208-104473330	OK	17.1147	10.153	-0.753327	-1.68568	-3.37282	5e-05	0.002075	yes	17.4769	18.8264	15.0407	6.61081	14.9799	12.4104		0.157022	6.36852
ENSMUSG00000067261	Foxd3	4:99656298-99658622	OK	0.821166	0.488532	-0.749221	-1.68088	-1.82837	0.0012	0.0321238	yes	1.15111	0.572662	0.739724	0.400699	0.636406	0.516322		0.112904	8.85705
ENSMUSG00000004872	Pax3	1:78101266-78197134	OK	7.24418	4.32025	-0.745708	-1.6768	-3.54899	5e-05	0.002075	yes	7.41182	7.03256	7.28816	4.0394	4.36639	4.83581		0.61034	1.63843
ENSMUSG00000097842	9330104G04Rik	7:16871346-16874886	OK	3.31469	1.97874	-0.744293	-1.67515	-2.59873	5e-05	0.002075	yes	2.95706	3.5227	3.4643	2.15156	2.03036	1.58146		0.64562	1.5489
ENSMUSG00000052229	Gpr17	18:31931506-31958619	OK	0.84086	0.502412	-0.742996	-1.67365	-2.20829	0.00015	0.00546921	yes	0.89362	0.740375	0.888585	0.389185	0.593973	0.637304		0.289629	3.4527
ENSMUSG00000041741	Pde3a	6:141246919-141507448	OK	0.842252	0.504265	-0.740068	-1.67025	-2.71911	5e-05	0.002075	yes	0.722018	0.944244	0.860492	0.40146	0.589793	0.624348		0.216062	4.6283
ENSMUSG00000022324	Matn2	15:34306679-34436242	OK	0.560292	0.335741	-0.738827	-1.66882	-1.84906	0.0006	0.0183863	yes	0.637019	0.602337	0.441518	0.327114	0.167143	0.521594		0.851989	1.17372
ENSMUSG00000048450	Msx1	5:37820484-37824583	OK	102.043	61.2729	-0.735859	-1.66539	-4.47399	5e-05	0.002075	yes	105.113	88.7484	112.268	49.2752	71.0617	75.4796		0.579406	1.72591
ENSMUSG00000043496	Tril	6:53815467-53868183	OK	27.0778	16.2715	-0.734765	-1.66413	-4.40944	5e-05	0.002075	yes	26.3317	25.1997	29.702	14.2699	17.4026	19.1436		0.234697	4.26082
ENSMUSG00000032492	Pth1r	9:110722084-110769798	OK	40.3138	24.3488	-0.727421	-1.65568	-3.33681	5e-05	0.002075	yes	39.4508	38.1249	43.3657	20.8255	28.0902	27.6541		0.0420597	23.7758
ENSMUSG00000048387	Osr1	12:9574441-9581499	OK	8.07165	4.8859	-0.724239	-1.65203	-3.07306	5e-05	0.002075	yes	8.22348	8.79515	7.19633	2.98312	6.53596	7.0414		0.016511	60.5656
ENSMUSG00000038872	Zfhx3	8:108703099-108961630	OK	1.9254	1.16796	-0.72117	-1.64852	-3.27364	5e-05	0.002075	yes	1.4496	1.80316	2.52344	1.06693	1.05635	1.48162		1.81458	0.551092
ENSMUSG00000015766	Eps8	6:137477244-137654876	OK	3.83291	2.32849	-0.719047	-1.64609	-1.57712	0.00115	0.0310368	yes	2.73544	4.53817	4.22512	1.88974	2.63578	2.89869		0.531854	1.88022
ENSMUSG00000033227	Wnt6	1:74771891-74785322	OK	12.9618	7.87656	-0.718628	-1.64562	-2.78314	5e-05	0.002075	yes	14.1874	11.352	13.346	5.7545	9.87383	10.1234		526.049	0.00190096
ENSMUSG00000028332	Hemgn	4:46393988-46413506	OK	8.99433	5.48366	-0.713876	-1.6402	-3.27281	5e-05	0.002075	yes	6.81759	10.6245	9.54092	4.63527	6.2385	6.42561		0.0238608	41.9098
ENSMUSG00000025270	Alas2	X:150519518-150643878	OK	21.4051	13.0526	-0.713623	-1.63992	-2.2369	5e-05	0.002075	yes	15.3624	24.3721	24.4809	12.0052	15.5819	12.618		0.0183996	54.3489
ENSMUSG00000038020	Rapgefl1	11:98836784-98853697	OK	1.87919	1.14885	-0.709929	-1.63572	-1.91981	0.00045	0.0142116	yes	1.61405	1.95402	2.06951	0.959239	1.16044	1.51646		13.4097	0.0745728
ENSMUSG00000022840	Adcy5	16:35154876-35305737	OK	1.08343	0.664567	-0.705115	-1.63027	-2.57511	5e-05	0.002075	yes	1.11461	1.04464	1.09103	0.596077	0.772392	0.693722		1.2497	0.800195
ENSMUSG00000025930	Msc	1:14752936-14776931	OK	2.4644	1.51208	-0.704698	-1.6298	-1.70546	0.00175	0.042507	yes	2.64763	1.87072	2.87486	1.45699	1.5833	1.55107		0.130392	7.66917
ENSMUSG00000032013	Trim29	9:43310762-43336125	OK	2.47577	1.52339	-0.700591	-1.62517	-2.47086	5e-05	0.002075	yes	2.6721	2.12496	2.63026	1.22942	1.79845	1.83629		165.312	0.00604918
ENSMUSG00000097657	Gm7389	8:3994625-3997509	OK	0.755597	0.467005	-0.694179	-1.61796	-1.75579	0.00145	0.0366203	yes	1.05957	0.318109	0.889109	0.353246	0.782216	0.379313		1.15105	0.868774
ENSMUSG00000069919	Hba-a1	11:32283510-32284465	OK	835.634	520.113	-0.684047	-1.60664	-4.09367	5e-05	0.002075	yes	698.281	853.217	955.404	537.938	538.819	465.757		0.0188975	52.9171
ENSMUSG00000030222	Rerg	6:137054824-137170497	OK	3.42717	2.14089	-0.678809	-1.60082	-1.59769	0.0014	0.03574	yes	2.87995	4.08484	3.31672	1.77005	2.29944	2.72402		0.510263	1.95977
ENSMUSG00000069814	Ccdc92b	11:74619604-74641516	OK	0.749095	0.469186	-0.674989	-1.59658	-1.91846	0.00045	0.0142116	yes	0.747788	0.768755	0.730741	0.415502	0.55839	0.487348		0.306493	3.26272
ENSMUSG00000056055	Sag	1:87803679-87845158	OK	1.04941	0.657785	-0.673885	-1.59536	-1.53937	0.00165	0.0406762	yes	0.927147	1.13286	1.08821	0.643536	0.561975	0.782091		0.687716	1.45409
ENSMUSG00000036602	Alx1	10:103007845-103029054	OK	58.9004	37.0727	-0.667918	-1.58878	-3.93279	5e-05	0.002075	yes	53.4565	56.0758	67.1688	32.5593	40.5073	42.665		0.00797146	125.448
ENSMUSG00000028111	Ctsk	3:95499255-95509362	OK	2.24447	1.41304	-0.667578	-1.5884	-1.8903	0.00055	0.0170438	yes	1.99047	1.95427	2.78868	0.890307	2.09893	1.77259		0.061823	16.1752
ENSMUSG00000009876	Cox4i2	2:152754172-152765037	OK	4.79994	3.02225	-0.667391	-1.5882	-1.83583	0.0008	0.0233044	yes	4.61179	4.09098	5.69705	3.05663	2.94221	3.03354		3.49009	0.286526
ENSMUSG00000030087	Klf15	6:90462575-90475238	OK	3.11117	1.97859	-0.652987	-1.57242	-2.29325	5e-05	0.002075	yes	3.03283	3.23611	3.06458	2.08388	2.08223	1.66436		1.9239	0.519779
ENSMUSG00000066362	Rps13-ps1	8:87047688-87048226	OK	54.1017	34.516	-0.648408	-1.56744	-2.28129	5e-05	0.002075	yes	10.2206	8.39975	143.685	9.91998	109.827	8.39721		1.15185	0.868171
ENSMUSG00000058620	Adra2b	2:127363207-127367221	OK	0.590619	0.376826	-0.648329	-1.56735	-1.74433	0.00165	0.0406762	yes	0.542135	0.704321	0.525401	0.395087	0.367864	0.349267		0.202528	4.9376
ENSMUSG00000045954	Sdpr	1:51218385-51333779	OK	2.72038	1.73729	-0.646964	-1.56587	-2.39659	5e-05	0.002075	yes	2.60126	2.87258	2.68728	1.42194	2.01157	2.09373		0.250272	3.99565
ENSMUSG00000060044	Tmem26	10:68723745-68782654	OK	2.72151	1.73925	-0.645941	-1.56476	-2.72173	5e-05	0.002075	yes	2.29025	2.78765	3.08663	1.31717	2.05321	2.26945		0.124679	8.02061
ENSMUSG00000026389	Steap3	1:120190756-120272705	OK	1.90183	1.2199	-0.640631	-1.55901	-2.0831	0.0002	0.00702851	yes	1.71835	2.04885	1.9383	1.16255	1.29077	1.26371		1.07464	0.930541
ENSMUSG00000022510	Trp63	16:25683762-25892102	OK	11.0917	7.11754	-0.640035	-1.55837	-3.08659	5e-05	0.002075	yes	11.0766	9.85133	12.3473	6.5267	7.46305	7.95371		393.881	0.00253884
ENSMUSG00000025889	Snca	6:60731574-60829855	OK	7.22172	4.64346	-0.637143	-1.55525	-2.32347	5e-05	0.002075	yes	6.4102	7.37549	7.87946	4.36381	5.52533	4.32088		0.903646	1.10663
ENSMUSG00000027907	S100a11	3:93520487-93526287	OK	71.3886	45.9867	-0.634478	-1.55238	-3.02823	5e-05	0.002075	yes	61.8196	61.3476	90.9987	44.8073	46.9793	47.3528		5.47696	0.182583
ENSMUSG00000073400	Trim10	17:36869573-36877833	OK	3.31978	2.13852	-0.634474	-1.55237	-2.28089	5e-05	0.002075	yes	2.43726	4.04979	3.47229	2.15234	2.21914	2.03025		0.0310166	32.2408
ENSMUSG00000057777	Mab21l2	3:86224679-86782692	OK	43.6798	28.1521	-0.633725	-1.55157	-2.74344	5e-05	0.002075	yes	45.8484	44.06	41.1309	25.4423	30.7195	31.0042		0.0133652	74.8211
ENSMUSG00000021186	Fbln5	12:101746564-101819055	OK	2.37974	1.53429	-0.633232	-1.55104	-2.69715	5e-05	0.002075	yes	2.2494	2.50835	2.38146	1.45471	1.62398	1.60377		0.26375	3.79148
ENSMUSG00000014361	Mertk	2:128698955-128802894	OK	5.07177	3.2715	-0.632538	-1.55029	-2.69877	5e-05	0.002075	yes	4.66791	5.48956	5.05783	2.98611	3.5139	3.59986		0.463706	2.15654
ENSMUSG00000026100	Mstn	1:53061639-53068079	OK	0.991766	0.640155	-0.631579	-1.54926	-1.73188	0.0011	0.029932	yes	1.33241	0.846953	0.795933	0.737618	0.491346	0.594037		0.0452382	22.1052
ENSMUSG00000051839	Gypa	8:80493780-80510542	OK	10.0733	6.50511	-0.630894	-1.54852	-2.82821	5e-05	0.002075	yes	8.14836	10.9021	11.1695	6.15512	6.78386	6.92633		0.0214928	46.5272
ENSMUSG00000091957	Rps2-ps10	18:61220481-61289924	OK	59.1112	38.1845	-0.630443	-1.54804	-3.21152	5e-05	0.002075	yes	64.5826	71.2294	41.5216	17.6479	76.8396	40.6027		1.16833	0.855925
ENSMUSG00000074852	Hpse2	19:42788946-43388311	OK	3.19803	2.06624	-0.630177	-1.54775	-2.09908	5e-05	0.002075	yes	3.06836	2.98419	3.54154	1.72553	2.43163	2.38226		0.0587694	17.0156
ENSMUSG00000001025	S100a6	3:90612881-90624181	OK	17.0372	11.0082	-0.630111	-1.54768	-1.74889	0.00135	0.0349498	yes	11.0839	19.6711	20.3566	10.3528	12.656	10.6712		2.47617	0.403849
ENSMUSG00000029372	Ppbp	5:90768517-90770063	OK	4.14204	2.6772	-0.629614	-1.54715	-1.91402	0.0007	0.0207948	yes	3.06704	4.6974	4.66168	2.01377	3.42289	3.25838		0.0397359	25.1662
ENSMUSG00000022512	Cldn1	16:26356641-26371841	OK	1.85378	1.20274	-0.624139	-1.54129	-2.14227	0.0001	0.00392328	yes	1.6428	1.63863	2.2799	1.07698	1.44917	1.20785		10.7529	0.0929981
ENSMUSG00000031661	Nkd1	8:88521353-88594884	OK	20.4684	13.2934	-0.622684	-1.53974	-2.97926	5e-05	0.002075	yes	21.096	18.5086	21.8007	12.6962	13.7389	14.0426		0.498751	2.00501
ENSMUSG00000073940	Hbb-bt	7:103812523-103813996	OK	63.7798	41.466	-0.62117	-1.53812	-3.16996	5e-05	0.002075	yes	62.3125	84.4006	44.6263	40.9139	29.0025	55.0337		0.0221838	45.0779
ENSMUSG00000020388	Pdlim4	11:54054927-54069014	OK	39.2425	25.526	-0.620448	-1.53735	-2.93009	5e-05	0.002075	yes	38.5172	37.6281	41.5823	23.8779	27.8324	26.516		0.798637	1.25213
ENSMUSG00000052217	Hbb-bh1	7:103841636-103843164	OK	3091.59	2011.6	-0.620007	-1.53688	-3.25785	5e-05	0.002075	yes	2231.94	3335.59	3707.25	2058.52	2058.89	1870.47		0.0120496	82.99
ENSMUSG00000047786	Lix1	17:17402671-17459387	OK	41.2343	26.8564	-0.61858	-1.53536	-3.74382	5e-05	0.002075	yes	38.1898	38.8515	46.6614	24.611	28.2984	29.9049		0.0219901	45.475
ENSMUSG00000026532	Spta1	1:174172775-174248450	OK	1.25671	0.819018	-0.61769	-1.53442	-2.394	5e-05	0.002075	yes	0.900164	1.43839	1.43159	0.65947	0.926874	1.03026		0.0785597	12.7292
ENSMUSG00000034435	Tmem30b	12:73543113-73546395	OK	2.77891	1.81828	-0.611945	-1.52832	-2.33644	5e-05	0.002075	yes	3.04239	2.50135	2.79299	1.61682	2.07467	1.96479		3.73098	0.268026
ENSMUSG00000028031	Dkk2	3:132085291-132180304	OK	6.77004	4.44332	-0.607528	-1.52365	-2.94994	5e-05	0.002075	yes	6.3354	6.43539	7.53933	3.47414	5.12126	5.70373		0.170235	5.87424
ENSMUSG00000016386	Mpped2	2:106693268-106868356	OK	47.1253	31.0357	-0.602573	-1.51842	-2.32632	0.0001	0.00392328	yes	41.7629	43.7443	55.8687	24.4939	38.7163	36.4387		0.426423	2.34509
ENSMUSG00000045658	Pid1	1:84036295-84364180	OK	4.94771	3.26183	-0.601077	-1.51685	-2.10534	5e-05	0.002075	yes	3.94935	5.34118	5.55259	2.51509	4.01868	3.99847		0.737544	1.35585
ENSMUSG00000001510	Dlx3	11:95120118-95125296	OK	8.33803	5.50959	-0.597763	-1.51337	-2.81494	5e-05	0.002075	yes	9.68751	7.48214	7.84445	5.7273	5.20391	5.37984		3.21749	0.310801
ENSMUSG00000044313	Mab21l3	3:101813075-101848959	OK	1.17245	0.775047	-0.597175	-1.51275	-1.75156	0.0009	0.0254108	yes	1.05231	1.22101	1.24404	0.738787	0.82995	0.792664		4.18836	0.238757
ENSMUSG00000046550	Spin2c	X:153832224-153834243	OK	26.805	17.7226	-0.596914	-1.51248	-2.70979	5e-05	0.002075	yes	23.6133	26.8379	29.9637	17.2225	18.2389	18.2063		0.450478	2.21986
ENSMUSG00000063838	1700027J19Rik	7:4151259-4164860	OK	21.4064	14.1562	-0.596605	-1.51215	-2.31131	5e-05	0.002075	yes	21.9697	18.4056	23.8438	12.2718	16.2007	15.8805		1.79375	0.557492
ENSMUSG00000029661	Col1a2	6:4504813-4541544	OK	58.6158	38.8179	-0.594566	-1.51002	-2.83208	5e-05	0.002075	yes	56.0232	60.5925	59.2317	33.0202	42.6606	46.5707		0.0467314	21.3989
ENSMUSG00000048251	Bcl11b	12:107910402-108003602	OK	5.98315	3.96357	-0.594103	-1.50953	-2.45178	5e-05	0.002075	yes	6.10063	6.2469	5.60191	2.83917	5.32363	4.85232		2.4269	0.412049
ENSMUSG00000074934	Grem1	2:113746163-113758646	OK	1.53006	1.01453	-0.592766	-1.50814	-2.07941	5e-05	0.002075	yes	1.59497	1.34304	1.65216	0.966459	0.928801	1.19642		1.2263	0.815461
ENSMUSG00000004552	Ctse	1:131638305-131675505	OK	1.83741	1.22178	-0.588687	-1.50388	-1.74538	0.00125	0.0331933	yes	1.47897	1.97786	2.05539	1.02243	1.56773	1.27452		0.984566	1.01568
ENSMUSG00000029373	Pf4	5:90772434-90773383	OK	24.4244	16.2821	-0.585035	-1.50008	-1.78888	0.0014	0.03574	yes	17.2193	30.3392	25.7148	14.4342	18.494	17.7661		0.0153858	64.9951
ENSMUSG00000001506	Col1a1	11:94936223-94953042	OK	5.78994	3.86928	-0.581485	-1.49639	-1.88729	0.0003	0.00993006	yes	5.8641	5.67287	5.83286	3.23975	4.21775	4.77986		0.0433495	23.0683
ENSMUSG00000039257	Vstm2b	7:40818475-40930594	OK	6.28158	4.20507	-0.578997	-1.49381	-1.72828	0.00105	0.028953	yes	6.3805	6.56284	5.90139	3.84361	4.24604	4.88702		0.203317	4.91843
ENSMUSG00000019866	Aim1	10:43950306-44148853	OK	0.561387	0.376858	-0.574974	-1.48965	-1.81953	0.00115	0.0310368	yes	0.503452	0.480078	0.700632	0.313277	0.421435	0.459445		12.7864	0.0782078
ENSMUSG00000022257	Laptm4b	15:34238025-34284295	OK	43.8482	29.4752	-0.573018	-1.48763	-3.341	5e-05	0.002075	yes	47.9198	48.0221	35.6028	29.4413	29.4667	29.5514		0.697761	1.43316
ENSMUSG00000022676	Snai2	16:14705851-14709395	OK	17.799	11.9867	-0.570361	-1.4849	-2.98001	5e-05	0.002075	yes	18.0816	16.8793	18.4361	11.0914	11.9856	13.7784		0.819238	1.22065
ENSMUSG00000028883	Sema3a	5:13125413-13602565	OK	16.6339	11.2026	-0.570293	-1.48483	-3.07584	5e-05	0.002075	yes	15.6866	16.3828	17.8323	10.4059	11.4943	12.5044		2.42771	0.411911
ENSMUSG00000046794	Ppp1r3b	8:35367749-35388139	OK	3.14098	2.11661	-0.569457	-1.48396	-2.3821	5e-05	0.002075	yes	2.95267	2.82199	3.64827	1.81866	2.41833	2.4108		2.0604	0.485342
ENSMUSG00000053441	Adamts19	18:58836763-59053678	OK	4.14668	2.79497	-0.569122	-1.48362	-2.63887	5e-05	0.002075	yes	4.06125	4.3491	4.02969	2.63363	2.79251	3.12012		0.988469	1.01167
ENSMUSG00000095742	CAAA01147332.1	JH584295.1:65-1479	OK	131.8	88.8801	-0.568418	-1.4829	-2.10707	0.00015	0.00546921	yes	155.941	110.476	128.983	53.1003	117.705	131.615		0	0
ENSMUSG00000025491	Ifitm1	7:140967220-140969825	OK	8.84348	5.96485	-0.568128	-1.4826	-1.68407	0.0019	0.0451544	yes	8.40198	7.71483	10.4136	5.39521	7.5175	5.55148		8.13775	0.122884
ENSMUSG00000021814	Anxa7	14:20455260-20480133	OK	11.4764	7.74556	-0.567232	-1.48168	-2.94935	5e-05	0.002075	yes	10.8138	11.8944	11.7211	8.04102	8.00458	6.89562		0.616015	1.62334
ENSMUSG00000027356	Fermt1	2:132904388-132945906	OK	4.25206	2.87035	-0.566935	-1.48137	-1.43961	0.00135	0.0349498	yes	4.49525	3.74213	4.5188	2.8599	2.51866	3.24295		258.723	0.00386513
ENSMUSG00000057315	Arhgap24	5:102474289-102897937	OK	2.16946	1.46507	-0.566366	-1.48079	-1.89599	0.001	0.0277131	yes	1.90452	2.09437	2.50949	1.15644	1.77827	1.76913		2.64363	0.378268
ENSMUSG00000105441	Gm8041	5:98075302-98075918	OK	27.8161	18.9429	-0.554261	-1.46842	-2.25026	5e-05	0.002075	yes	32.3739	31.5114	19.5631	14.0993	16.095	31.4781		0	0
ENSMUSG00000031636	Pdlim3	8:45885460-45919548	OK	3.56936	2.43362	-0.552563	-1.46669	-1.79033	0.001	0.0277131	yes	3.39848	3.62321	3.68639	1.43959	3.53111	3.32418		0.441762	2.26366
ENSMUSG00000036856	Wnt4	4:137277488-137299726	OK	4.61905	3.16167	-0.546911	-1.46095	-2.52478	5e-05	0.002075	yes	3.82381	4.10571	5.92763	2.83554	3.3885	3.5871		245.048	0.00408083
ENSMUSG00000070720	Tmem200b	4:131921770-131923140	OK	11.6355	7.96913	-0.546036	-1.46007	-2.35179	5e-05	0.002075	yes	11.2434	11.5134	12.1497	7.53111	9.10719	7.70709		0.109506	9.13189
ENSMUSG00000067586	S1pr3	13:51408617-51422797	OK	17.4752	12.0251	-0.539255	-1.45322	-3.15861	5e-05	0.002075	yes	16.5297	17.7314	18.1643	11.2943	12.7992	12.7125		0.0223892	44.6644
ENSMUSG00000034271	Jdp2	12:85599104-85639878	OK	3.72876	2.56675	-0.53875	-1.45271	-1.81561	0.00045	0.0142116	yes	3.73891	3.22044	4.22692	2.70363	2.54685	2.3129		9.98381	0.100162
ENSMUSG00000055609	Hba-x	11:32276399-32278116	OK	2119.52	1462.42	-0.535379	-1.44932	-2.78256	5e-05	0.002075	yes	1864.8	2487.87	2005.89	1486.94	1511.77	1364.03		0.0182247	54.8705
ENSMUSG00000030208	Emp1	6:135362544-135383173	OK	22.4558	15.4958	-0.535212	-1.44916	-3.03633	5e-05	0.002075	yes	19.775	19.9318	27.6607	13.6844	15.6125	19.0019		13.9432	0.0717196
ENSMUSG00000029552	Tes	6:17065009-17171833	OK	57.8241	39.9106	-0.534898	-1.44884	-2.419	5e-05	0.002075	yes	54.3188	52.1242	67.0292	39.2307	41.9539	39.227		1.19573	0.836307
ENSMUSG00000002732	Fkbp7	2:76663043-76673116	OK	15.7176	10.8647	-0.532732	-1.44667	-2.10645	5e-05	0.002075	yes	13.8412	14.6121	18.6995	8.99525	11.8208	13.6475		0.235611	4.24429
ENSMUSG00000087150	BC064078	6:128992951-129008040	OK	5.49245	3.80777	-0.528504	-1.44243	-2.17047	5e-05	0.002075	yes	4.97297	4.7099	6.79448	3.54503	3.58797	4.55304		3.85755	0.259232
ENSMUSG00000046229	Scand1	2:156311846-156375638	OK	31.8253	22.0727	-0.527908	-1.44184	-2.10646	0.0004	0.0129039	yes	34.8147	39.9971	20.6641	11.3488	42.1584	23.4351		1.44872	0.690265
ENSMUSG00000095105	Edaradd	13:12471208-12520450	OK	0.597508	0.416501	-0.520638	-1.43459	-1.72145	0.0019	0.0451544	yes	0.576583	0.539834	0.676107	0.359677	0.534023	0.412627		5.85865	0.170688
ENSMUSG00000028717	Tal1	4:115056425-115071755	OK	3.79771	2.64839	-0.520017	-1.43397	-2.04058	0.0001	0.00392328	yes	3.29541	4.02878	4.06895	2.47332	2.84026	2.80666		0.0388699	25.7268
ENSMUSG00000082229	Nap1l2	X:103182970-103311782	OK	4.42462	3.0896	-0.518133	-1.4321	-2.07902	0.0002	0.00702851	yes	4.05802	4.38718	4.82868	2.97361	3.21815	3.19304		1.06516	0.938828
ENSMUSG00000060969	Irx1	13:71957920-71963723	OK	2.5051	1.75252	-0.515438	-1.42943	-1.75855	0.0014	0.03574	yes	2.94263	2.50094	2.07174	1.2421	2.25489	2.271		5.52274	0.181069
ENSMUSG00000012017	Scarf2	16:17797281-17808287	OK	17.3668	12.1503	-0.515336	-1.42933	-2.89827	5e-05	0.002075	yes	18.5608	17.9219	15.6177	9.84991	15.6658	13.2357		0.16923	5.90913
ENSMUSG00000032291	Crabp1	9:54764747-54773110	OK	1122.04	786.128	-0.513282	-1.42729	-2.99321	5e-05	0.002075	yes	1159.86	1027.51	1178.74	789.248	800.016	766		0.136744	7.31295
ENSMUSG00000002799	Jag2	12:112908589-112929495	OK	6.90286	4.85011	-0.509177	-1.42324	-2.56776	5e-05	0.002075	yes	7.39521	6.68445	6.62891	4.36378	5.78394	4.88894		52.7318	0.0189639
ENSMUSG00000018500	Adora2b	11:62248983-62266453	OK	3.0934	2.17493	-0.508226	-1.4223	-1.71752	0.0013	0.0339748	yes	3.01654	2.64394	3.61972	1.98152	2.46603	2.27065		0.129938	7.69596
ENSMUSG00000045871	Slitrk6	14:110748577-110755149	OK	10.1876	7.17978	-0.504808	-1.41893	-2.73174	5e-05	0.002075	yes	10.1377	9.0545	11.3707	5.56762	7.85433	9.72954		0.295628	3.38263
ENSMUSG00000021458	2010111I01Rik	13:63014933-63497278	OK	10.7599	7.58797	-0.503878	-1.41802	-2.07032	0.0004	0.0129039	yes	9.68155	11.3749	11.2233	6.51324	8.99585	8.32956		1.23863	0.807343
ENSMUSG00000052854	Nrk	X:138914429-139010532	OK	1.83261	1.29412	-0.501926	-1.4161	-2.13731	5e-05	0.002075	yes	1.7062	1.92205	1.86959	1.01934	1.44021	1.69759		0.791114	1.26404
ENSMUSG00000019779	Frk	10:34483399-34611226	OK	2.55239	1.80281	-0.501607	-1.41579	-2.07873	0.0001	0.00392328	yes	2.41908	2.44451	2.79359	1.57534	1.8812	2.17935		0.793794	1.25977
ENSMUSG00000022231	Sema5a	15:32244812-32696341	OK	5.70198	4.02773	-0.501497	-1.41568	-2.86837	5e-05	0.002075	yes	4.97002	5.48084	6.65509	3.71186	3.84823	4.83898		0.527258	1.8966
ENSMUSG00000032334	Loxl1	9:58287722-58313212	OK	3.65761	2.60115	-0.491751	-1.40615	-2.02537	0.0002	0.00702851	yes	3.74442	3.61906	3.60934	1.89779	3.70616	2.90287		0.770418	1.298
ENSMUSG00000016262	Sertad4	1:192844487-192856246	OK	23.3577	16.6311	-0.490014	-1.40446	-2.71697	5e-05	0.002075	yes	23.8753	22.387	23.8108	15.5332	17.2856	18.1723		1.11245	0.89892
ENSMUSG00000051397	Tacstd2	6:67532488-67556216	OK	4.61952	3.29192	-0.488815	-1.40329	-1.79234	0.00095	0.0265952	yes	4.09114	4.3518	5.41562	2.63092	3.63418	4.27164		161.693	0.00618456
ENSMUSG00000046743	Fat4	3:38874569-39011985	OK	3.27454	2.33627	-0.487081	-1.40161	-2.67	5e-05	0.002075	yes	2.46273	3.46304	3.89784	2.14074	2.32078	2.74285		0.208837	4.78843
ENSMUSG00000064080	Fbln2	6:91212454-91272540	OK	20.112	14.3554	-0.48646	-1.401	-1.87886	0.0003	0.00993006	yes	21.4666	22.3451	16.5242	12.3947	17.1316	15.5007		0.211046	4.7383
ENSMUSG00000045629	Sh3tc2	18:61953074-62015715	OK	2.46444	1.76019	-0.485527	-1.4001	-1.98547	0.00035	0.0114701	yes	2.29745	2.46346	2.63241	1.73183	1.886	1.69112		4.22627	0.236615
ENSMUSG00000038296	Galnt18	7:111471660-111779977	OK	3.83919	2.74634	-0.483292	-1.39793	-1.89796	0.00045	0.0142116	yes	3.51087	3.83152	4.17517	2.79023	2.69321	2.71168		16.4762	0.0606935
ENSMUSG00000049107	Ntf3	6:126101411-126166910	OK	9.50471	6.82528	-0.477755	-1.39257	-1.96352	0.0004	0.0129039	yes	9.80829	9.14644	9.55941	5.74625	7.35541	8.45319		1.07255	0.932357
ENSMUSG00000022817	Itgb5	16:33829664-33949153	OK	54.7906	39.4996	-0.47209	-1.38712	-2.16011	5e-05	0.002075	yes	52.2404	53.2394	58.8922	38.2663	42.1626	39.3033		1.71539	0.582958
ENSMUSG00000064337	mt-Rnr1	MT:69-1024	OK	391.943	282.614	-0.471812	-1.38685	-2.88923	5e-05	0.002075	yes	385.843	409.078	380.907	291.671	261.298	285.813		0	0
ENSMUSG00000025795	Rassf3	10:121410349-121476250	OK	18.9172	13.6485	-0.470959	-1.38603	-2.709	5e-05	0.002075	yes	18.9818	17.4945	20.2754	12.3983	14.6713	15.126		0.403149	2.48047
ENSMUSG00000021215	Net1	13:3882564-3918220	OK	63.1484	45.7753	-0.464176	-1.37953	-2.84458	5e-05	0.002075	yes	63.6316	62.4559	63.3577	44.8148	45.3525	48.1194		0.924995	1.08109
ENSMUSG00000054675	Tmem119	5:113793728-113800516	OK	32.2181	23.3793	-0.462639	-1.37806	-2.11777	0.0001	0.00392328	yes	31.6056	30.9566	34.0922	21.0744	25.7324	25.6361		0.0105796	94.5213
ENSMUSG00000078190	Dnm3os	1:161942085-162479943	OK	8.57482	6.24031	-0.458489	-1.3741	-1.86514	0.0007	0.0207948	yes	10.9866	8.23243	6.50538	5.95557	5.49353	7.55656		0.0273239	36.5981
ENSMUSG00000067608	Pcna-ps2	19:9283237-9284494	OK	56.0866	40.8735	-0.45649	-1.3722	-2.52107	5e-05	0.002075	yes	65.5595	31.7211	70.9792	34.9652	29.0835	64.4801		0.805532	1.24142
ENSMUSG00000068220	Lgals1	15:78926724-78930465	OK	201.946	147.224	-0.455957	-1.37169	-2.73819	5e-05	0.002075	yes	165.94	187.429	252.47	141.068	152.097	154.664		0.208863	4.78783
ENSMUSG00000020241	Col6a2	10:76595761-76623630	OK	3.08092	2.2538	-0.451004	-1.36699	-1.88956	0.00085	0.024374	yes	2.80312	3.47691	2.96274	1.91768	2.55749	2.62234		0.218781	4.57078
ENSMUSG00000070858	Gm1673	5:33983432-33985013	OK	84.4207	61.781	-0.450432	-1.36645	-2.11526	5e-05	0.002075	yes	97.3815	88.4295	67.4509	43.2034	94.264	66.4533		1.03144	0.969521
ENSMUSG00000008999	Bmp7	2:172868011-172940321	OK	15.0771	11.0357	-0.450184	-1.36621	-2.54808	5e-05	0.002075	yes	15.697	13.5374	15.9967	10.4646	12.2023	11.0112		3.97983	0.251267
ENSMUSG00000032231	Anxa2	9:69453619-69491795	OK	65.485	48.0019	-0.448072	-1.36422	-2.38308	5e-05	0.002075	yes	55.1664	66.0422	75.2464	38.8044	56.9761	57.4228		5.25749	0.190205
ENSMUSG00000074415	2610203C20Rik	9:41327259-41655483	OK	20.222	14.8319	-0.447227	-1.36342	-2.38238	5e-05	0.002075	yes	19.1662	26.4659	15.0341	10.5242	18.7093	19.5699		0.724148	1.38093
ENSMUSG00000022883	Robo1	16:72663148-73046095	OK	14.3237	10.5092	-0.44675	-1.36297	-2.67054	5e-05	0.002075	yes	14.1067	14.4403	14.424	8.92569	10.8843	13.3012		0.798485	1.25237
ENSMUSG00000029231	Pdgfra	5:75152291-75198215	OK	30.5738	22.4517	-0.445472	-1.36176	-1.83784	5e-05	0.002075	yes	29.201	31.6351	30.8853	20.5992	23.9476	24.6606		0.019954	50.1153
ENSMUSG00000041695	Kcnj2	11:111066163-111076821	OK	3.84787	2.83632	-0.440042	-1.35664	-2.0887	0.0003	0.00993006	yes	3.84817	3.41752	4.27792	2.0759	3.54632	3.64714		1.42716	0.700691
ENSMUSG00000027848	Olfml3	3:103722221-103738001	OK	3.49104	2.57365	-0.439843	-1.35646	-1.85847	0.0003	0.00993006	yes	3.20617	3.60283	3.66411	2.14589	3.04742	2.95538		0.0638835	15.6535
ENSMUSG00000021701	Plk2	13:110395043-110400844	OK	22.9736	16.9685	-0.437119	-1.3539	-2.51266	5e-05	0.002075	yes	23.1336	21.6277	24.1595	15.3043	18.7347	18.5306		1.35618	0.737367
ENSMUSG00000024529	Lox	18:52516068-52529867	OK	2.28973	1.69786	-0.431455	-1.34859	-1.66337	0.00165	0.0406762	yes	2.11704	2.02771	2.72443	1.2014	2.19456	2.19409		0.0602662	16.593
ENSMUSG00000040310	Alx4	2:93642383-93822568	OK	34.7497	25.8061	-0.42929	-1.34657	-2.24449	5e-05	0.002075	yes	35.9001	33.272	35.0769	25.9368	25.6142	25.7365		0.0311705	32.0816
ENSMUSG00000051920	Rspo2	15:43020810-43170818	OK	12.1814	9.06056	-0.427005	-1.34444	-2.31532	5e-05	0.002075	yes	11.5018	12.3385	12.7039	8.32547	9.31467	10.2766		0.0237046	42.1858
ENSMUSG00000019853	Hebp2	10:18540122-18546076	OK	6.68103	4.97226	-0.426171	-1.34366	-1.77726	0.0009	0.0254108	yes	6.73855	6.14629	7.15826	4.2389	5.77505	5.63617		1.62631	0.614889
ENSMUSG00000026640	Plxna2	1:194618217-194816869	OK	5.70355	4.2466	-0.425551	-1.34309	-2.19545	5e-05	0.002075	yes	5.11271	5.88088	6.11706	4.04849	4.27915	4.61027		3.63867	0.274826
ENSMUSG00000019987	Arg1	10:24915207-24927470	OK	6.76425	5.03717	-0.425316	-1.34287	-1.65566	0.00195	0.0460775	yes	6.45368	5.80526	8.0338	5.20677	4.92237	4.81276		2.97224	0.336447
ENSMUSG00000032024	Clmp	9:40685961-40785319	OK	27.6208	20.5973	-0.4233	-1.34099	-2.2651	5e-05	0.002075	yes	27.1595	27.9433	27.7595	19.0414	21.5755	22.7309		0.106473	9.39201
ENSMUSG00000025978	Rftn2	1:55170158-55235622	OK	8.33664	6.21783	-0.423056	-1.34076	-1.84821	0.00085	0.024374	yes	7.74106	8.00311	9.26576	5.76096	6.45127	6.89812		0.0212679	47.0192
ENSMUSG00000070407	Hs3st3b1	11:63885791-63922290	OK	4.02572	3.00397	-0.422378	-1.34013	-1.99521	0.0003	0.00993006	yes	3.91476	4.30396	3.85846	2.89378	2.94931	3.27902		0.509833	1.96143
ENSMUSG00000027524	Edn3	2:174760618-174784042	OK	7.85731	5.87052	-0.420548	-1.33844	-1.93563	0.00025	0.00851392	yes	7.03306	7.76145	8.77741	5.69181	5.84886	6.24959		2.07784	0.481268
ENSMUSG00000046312	AI464131	4:41495603-41503076	OK	3.09588	2.31484	-0.419438	-1.33741	-1.64054	0.0012	0.0321238	yes	3.08129	3.12044	3.0859	1.96241	2.59189	2.74265		0.553625	1.80628
ENSMUSG00000066607	6030419C18Rik	9:58488602-58499742	OK	6.75803	5.06243	-0.416773	-1.33494	-1.79722	0.0004	0.0129039	yes	6.96022	5.73979	7.57407	4.50269	5.45315	5.79118		1.01826	0.98207
ENSMUSG00000040260	Daam2	17:49456021-49564337	OK	3.76485	2.82059	-0.416597	-1.33478	-2.01699	0.0003	0.00993006	yes	3.57289	3.73402	3.98765	2.02864	3.68082	3.54426		0.0846808	11.8091
ENSMUSG00000026249	Serpine2	1:79794196-79861180	OK	48.3733	36.2495	-0.416249	-1.33445	-1.81149	0.0005	0.0156708	yes	45.942	46.2477	52.9301	36.8791	35.1137	36.1261		1.09873	0.91014
ENSMUSG00000050212	Eva1b	4:126147743-126149875	OK	23.4127	17.5557	-0.415348	-1.33362	-1.98542	0.00015	0.00546921	yes	24.1181	24.0139	22.1061	15.4677	19.851	19.4365		0.189568	5.27514
ENSMUSG00000029864	Gstk1	6:42245934-42250447	OK	14.4084	10.8089	-0.414693	-1.33301	-1.68903	0.00205	0.0480964	yes	12.8042	13.0731	17.3479	9.83196	12.061	11.5107		1.08849	0.918707
ENSMUSG00000001288	Rarg	15:102234937-102257517	OK	53.9782	40.5332	-0.413275	-1.33171	-1.88934	0.00015	0.00546921	yes	54.8974	50.0222	57.0151	41.0298	39.3509	40.7221		0.420868	2.37604
ENSMUSG00000000861	Bcl11a	11:24078055-24174123	OK	25.9935	19.5191	-0.413264	-1.3317	-1.93801	0.0003	0.00993006	yes	27.6408	25.7205	24.619	14.9103	24.5387	23.7169		1.1183	0.894211
ENSMUSG00000060708	Bloc1s4	5:36747377-36750437	OK	10.3799	7.79988	-0.412272	-1.33078	-1.71207	0.00145	0.0366203	yes	10.4415	10.0695	10.6287	6.82952	9.25679	8.28368		0.926426	1.07942
ENSMUSG00000023411	Nfatc4	14:55824794-55833943	OK	39.6009	29.8042	-0.410016	-1.3287	-2.47394	5e-05	0.002075	yes	41.6772	37.219	39.9064	28.5537	30.457	31.6525		0.481165	2.07829
ENSMUSG00000051041	Olfml1	7:107567445-107591094	OK	7.77422	5.85606	-0.408767	-1.32755	-1.70907	0.0014	0.03574	yes	6.8268	7.13147	9.36439	5.4557	6.83047	5.68237		0.0551183	18.1428
ENSMUSG00000038175	Mylip	13:45389741-45412019	OK	7.08534	5.34304	-0.407178	-1.32609	-1.95613	0.00045	0.0142116	yes	6.70895	7.22264	7.32444	4.84993	5.82603	5.84626		1.05617	0.946816
ENSMUSG00000019820	Utrn	10:12382187-12861735	OK	7.12522	5.37935	-0.405502	-1.32455	-2.40786	5e-05	0.002075	yes	6.28687	7.14992	7.93887	5.11092	5.31286	5.98271		1.60787	0.621942
ENSMUSG00000032373	Car12	9:66713685-66766845	OK	6.70406	5.06605	-0.404174	-1.32333	-1.94384	0.00025	0.00851392	yes	6.5472	7.11337	6.45163	4.73562	5.67108	5.12188		0.206971	4.8316
ENSMUSG00000036158	Prickle1	15:93499113-93595891	OK	6.81784	5.15233	-0.404091	-1.32325	-2.05285	0.0002	0.00702851	yes	6.48536	6.91125	7.05692	4.33814	6.02851	5.90452		0.383948	2.60452
ENSMUSG00000028480	Glipr2	4:43957400-43979118	OK	33.1837	25.114	-0.401982	-1.32132	-2.28839	0.0001	0.00392328	yes	31.5421	30.9894	37.0195	21.2206	28.4271	29.5878		0.18578	5.38271
ENSMUSG00000037206	Islr	9:58156264-58159221	OK	8.3216	6.29797	-0.401974	-1.32131	-1.80264	0.00135	0.0349498	yes	7.94835	7.96276	9.0537	4.63585	8.23622	7.68396		0.292691	3.41657
ENSMUSG00000048285	Frmd6	12:70825513-70902232	OK	23.5131	17.8414	-0.398238	-1.3179	-2.39549	5e-05	0.002075	yes	23.0307	23.1085	24.4002	16.624	18.5409	19.5767		0.300767	3.32483
ENSMUSG00000047261	Gap43	16:42248441-42340651	OK	54.3481	41.3003	-0.396077	-1.31592	-2.19114	0.0001	0.00392328	yes	58.4654	52.485	52.0939	37.452	41.9627	48.3345		0.202837	4.93007
ENSMUSG00000044337	Ackr3	1:90203979-90216751	OK	16.1407	12.2721	-0.395326	-1.31524	-1.8098	0.00015	0.00546921	yes	14.9036	15.1059	18.4126	10.6011	14.3066	13.5795		2.33653	0.427985
ENSMUSG00000026688	Mgst3	1:167371965-167393841	OK	18.1599	13.8183	-0.394175	-1.31419	-1.79887	0.0013	0.0339748	yes	15.909	19.1024	19.4683	13.0611	15.0676	14.0833		0.869609	1.14994
ENSMUSG00000067276	Capn6	X:143802230-143827414	OK	87.7089	66.9965	-0.388638	-1.30916	-2.37057	5e-05	0.002075	yes	82.2356	89.262	91.6292	59.1016	72.9315	76.8512		1.53023	0.653498
ENSMUSG00000024232	Bambi	18:3507956-3516404	OK	7.57227	5.78919	-0.387364	-1.308	-2.09693	0.00015	0.00546921	yes	7.4023	7.37916	7.93535	5.76877	5.92073	5.69848		1.37594	0.726776
ENSMUSG00000028019	Pdgfc	3:81036415-81214040	OK	36.7456	28.1005	-0.386977	-1.30765	-2.31194	5e-05	0.002075	yes	34.4398	36.2172	39.5797	24.6081	30.9125	32.2733		9.5216	0.105024
ENSMUSG00000047281	Sfn	4:133600555-133602168	OK	16.5751	12.6806	-0.386398	-1.30713	-1.90043	0.0006	0.0183863	yes	14.4838	14.8078	20.4337	9.78087	15.3326	15.8279		143.574	0.00696507
ENSMUSG00000039831	Arhgap29	3:121952540-122016753	OK	42.8447	32.8611	-0.382736	-1.30381	-1.7428	0.001	0.0277131	yes	41.2363	38.2145	49.0832	34.659	30.604	31.5222		2.86189	0.349419
ENSMUSG00000029838	Ptn	6:36714928-36810220	OK	157.605	120.948	-0.381931	-1.30308	-2.33997	5e-05	0.002075	yes	161.471	141.789	169.555	115.429	117.133	135.8		0.705898	1.41664
ENSMUSG00000021469	Msx2	13:53466883-53473074	OK	17.1678	13.1788	-0.381487	-1.30268	-2.0539	0.0001	0.00392328	yes	19.2066	14.5414	17.7554	10.9196	14.9486	15.9273		1.74049	0.57455
ENSMUSG00000036528	Ppfibp2	7:107595206-107758032	OK	16.9714	13.0599	-0.377961	-1.2995	-2.14649	5e-05	0.002075	yes	16.2879	17.1421	17.4842	13.1497	13.0765	12.8637		0.0441774	22.636
ENSMUSG00000019947	Arid5b	10:68095592-68278726	OK	3.29362	2.5353	-0.377519	-1.29911	-1.66849	0.00175	0.042507	yes	3.19538	2.9092	3.77629	2.50149	2.41568	2.72254		0.920108	1.08683
ENSMUSG00000055538	Zcchc24	14:25711641-25769039	OK	15.2916	11.8256	-0.370828	-1.29309	-2.13383	5e-05	0.002075	yes	14.5451	14.9096	16.42	11.0692	12.6263	12.5375		0.0213005	46.9473
ENSMUSG00000078794	Dact3	7:16875316-16887462	OK	34.954	27.1143	-0.366403	-1.28913	-2.19185	5e-05	0.002075	yes	38.0218	32.4211	34.4191	24.9111	32.0823	26.5528		0.130991	7.63408
ENSMUSG00000042834	Nrep	18:33437018-33464029	OK	298.482	232.212	-0.362201	-1.28539	-2.11159	5e-05	0.002075	yes	295.018	260.905	339.522	220.919	224.417	262.592		1.15155	0.868394
ENSMUSG00000029755	Dlx5	6:6877804-6882085	OK	25.7787	20.0694	-0.361187	-1.28448	-1.90588	0.0008	0.0233044	yes	27.1146	26.1292	24.0924	18.2979	22.4851	21.1966		0.804021	1.24375
ENSMUSG00000034612	Chst11	10:82985497-83195900	OK	4.71813	3.67881	-0.358974	-1.28251	-1.81269	0.00065	0.0196271	yes	4.53789	4.78179	4.8347	3.46672	3.78988	3.99193		10.5332	0.0949381
ENSMUSG00000034248	Slc25a37	14:69241847-69305355	OK	19.8262	15.469	-0.358026	-1.28167	-2.02375	0.0002	0.00702851	yes	18.1703	22.0851	19.2231	15.2055	16.0112	15.4538		0.326341	3.06428
ENSMUSG00000038481	Cdk19	10:40348507-40483818	OK	9.10253	7.10233	-0.357974	-1.28162	-2.03695	0.0002	0.00702851	yes	8.91143	8.8339	9.56225	6.30102	7.91516	7.89212		0.909844	1.09909
ENSMUSG00000024134	Six2	17:85684276-85688274	OK	55.7434	43.6754	-0.351981	-1.27631	-2.10482	0.0001	0.00392328	yes	59.5011	48.6315	59.0976	34.8315	51.6367	53.4018		0.468959	2.13238
ENSMUSG00000070462	Mesdc1	7:83879872-83884305	OK	21.1021	16.6718	-0.339977	-1.26574	-2.02552	0.00015	0.00546921	yes	21.6023	21.1163	20.5876	14.8866	19.6155	17.2983		0.405495	2.46612
ENSMUSG00000025351	Cd63	10:128908918-128912816	OK	80.5747	63.8181	-0.336363	-1.26257	-1.92871	0.00025	0.00851392	yes	77.0608	75.4872	89.1761	63.8291	64.7832	62.8308		0.778497	1.28453
ENSMUSG00000024588	Fech	18:64456549-64489066	OK	17.8153	14.161	-0.33119	-1.25805	-1.86373	0.0007	0.0207948	yes	15.6717	20.7863	16.9879	13.1498	15.519	14.8257		0.755521	1.32359
ENSMUSG00000017491	Rarb	14:16430841-16575472	OK	18.56	14.7789	-0.328656	-1.25584	-1.87432	0.0005	0.0156708	yes	18.3937	17.7924	19.4941	13.8273	15.5819	15.8793		0.334692	2.98782
ENSMUSG00000064339	mt-Rnr2	MT:1093-2675	OK	242.822	193.448	-0.327952	-1.25523	-1.98649	0.00025	0.00851392	yes	223.705	260.631	244.13	220.226	156.248	177.093		0	0
ENSMUSG00000032014	Oaf	9:43221277-43239816	OK	24.8502	19.7997	-0.32778	-1.25508	-1.87718	0.00085	0.024374	yes	24.1853	23.3829	26.9825	19.7816	20.2319	19.4037		0.272293	3.67251
ENSMUSG00000021359	Tfap2a	13:40715674-40735162	OK	10.1366	8.09533	-0.324416	-1.25216	-1.65315	0.0013	0.0339748	yes	11.5473	9.6615	9.20112	7.82434	7.84276	8.8899		6.95605	0.14376
ENSMUSG00000035305	Ror1	4:100095790-100444765	OK	4.75535	3.80997	-0.319771	-1.24813	-1.63683	0.00185	0.0444134	yes	4.49812	5.13759	4.63033	3.8881	3.61233	3.85134		1.47124	0.6797
ENSMUSG00000020846	Fam101b	11:76019193-76027782	OK	16.8427	13.5064	-0.318479	-1.24702	-1.83032	0.0005	0.0156708	yes	16.8509	15.9411	17.7362	13.1732	14.0306	13.6488		2.46407	0.405832
ENSMUSG00000033420	Antxr1	6:87133852-87335821	OK	13.9983	11.2674	-0.313094	-1.24237	-1.80534	0.00135	0.0349498	yes	12.9973	14.8422	14.1555	10.3275	11.7159	12.6989		1.35187	0.739714
ENSMUSG00000070394	Tmem256	11:69838513-69839618	OK	197.852	159.412	-0.311659	-1.24113	-1.72661	0.00125	0.0331933	yes	163.732	175.92	253.904	150.343	169.69	167.273		0.896611	1.11531
ENSMUSG00000000093	Tbx2	11:85832550-85841948	OK	45.4454	36.6898	-0.308757	-1.23864	-1.86353	0.0006	0.0183863	yes	50.5016	46.563	39.2717	29.2432	47.6691	40.6037		0.0284819	35.11
ENSMUSG00000051379	Flrt3	2:140395308-142392966	OK	19.7483	15.9474	-0.30841	-1.23834	-1.69297	0.0015	0.0376527	yes	20.1809	20.026	19.038	15.9218	15.5912	16.3547		0.834032	1.199
ENSMUSG00000021136	Smoc1	12:81026807-81186414	OK	22.5344	18.228	-0.305967	-1.23625	-1.79712	0.00085	0.024374	yes	24.0497	22.5846	20.9687	16.2765	20.4185	19.9407		1.03932	0.962169
ENSMUSG00000060591	Ifitm2	7:140948957-140955987	OK	229.971	186.03	-0.305916	-1.2362	-1.83909	0.0009	0.0254108	yes	229.711	205.221	254.98	190.414	181.02	182.272		1.11833	0.894187
ENSMUSG00000031239	Itm2a	X:107397098-107403376	OK	70.6157	57.1329	-0.305668	-1.23599	-1.83581	0.0007	0.0207948	yes	65.99	64.8623	80.9949	50.3101	59.7781	68.1332		0.493023	2.0283
ENSMUSG00000020108	Ddit4	10:59949674-59951770	OK	45.1843	36.5775	-0.304865	-1.2353	-1.78112	0.00055	0.0170438	yes	45.871	44.9161	44.7659	36.2894	42.3815	31.3498		2.34928	0.425662
ENSMUSG00000041203	2310036O22Rik	8:85026822-85030286	OK	201.706	163.409	-0.303767	-1.23436	-1.8333	0.0004	0.0129039	yes	220.331	202.706	182.082	132.058	209.609	179.911		0.908489	1.10073
ENSMUSG00000020393	Kremen1	11:5191551-5261558	OK	9.12188	7.39288	-0.303196	-1.23387	-1.68214	0.0013	0.0339748	yes	9.34479	8.45928	9.56157	7.10731	7.25663	8.10026		3.49757	0.285913
ENSMUSG00000079523	Tmsb10	6:72957346-72958748	OK	1623.32	1318.57	-0.299972	-1.23112	-1.75673	0.0013	0.0339748	yes	1600.34	1467.91	1801.71	1305.85	1290.26	1372.32		0.658945	1.51758
ENSMUSG00000001995	Sipa1l2	8:125418062-125569808	OK	7.69047	6.25268	-0.298596	-1.22995	-1.6851	0.0016	0.0398	yes	7.33412	8.05681	7.68048	5.54753	7.00939	6.90628		0.878029	1.13891
ENSMUSG00000021381	Barx1	13:48662997-48666507	OK	74.6859	60.7317	-0.298386	-1.22977	-1.76783	0.0008	0.0233044	yes	72.6351	77.0631	74.3596	49.004	78.8495	66.0695		0.0416013	24.0377
ENSMUSG00000061477	Rps7	12:28630846-28635953	OK	106.075	86.463	-0.294927	-1.22682	-1.74173	0.00145	0.0366203	yes	86.4095	102.176	129.639	87.4881	87.3853	83.4906		0.976873	1.02367
ENSMUSG00000020601	Trib2	12:15791726-15816877	OK	15.4782	12.6632	-0.289594	-1.2223	-1.64373	0.0017	0.0416601	yes	15.1706	14.9475	16.3165	11.1002	14.2883	14.1643		1.34548	0.743227
ENSMUSG00000020105	Lrig3	10:125966218-126015359	OK	16.6725	13.6984	-0.283466	-1.21712	-1.65419	0.00175	0.042507	yes	16.3254	16.836	16.8562	13.3701	14.3746	13.6789		0.413564	2.418
ENSMUSG00000049932	H2afx	9:44334693-44336077	OK	251.879	207.186	-0.281807	-1.21572	-1.69836	0.0013	0.0339748	yes	262.847	252.831	239.96	159.054	247.041	263.594		1.4085	0.709977
ENSMUSG00000018451	6330403K07Rik	11:71031940-71033513	OK	71.5374	58.8798	-0.280925	-1.21497	-1.67813	0.00135	0.0349498	yes	65.6191	71.8545	77.1385	52.1131	64.6111	66.6819		1.36221	0.734101
ENSMUSG00000045136	Tubb2b	13:34127007-34130354	OK	184.245	223.701	0.279949	1.21415	1.68176	0.0017	0.0416601	yes	170.361	211.74	170.634	198.516	268.439	229.334		5.33149	0.187565
ENSMUSG00000031996	Aplp2	9:31149556-31211815	OK	45.9645	55.8121	0.280058	1.21424	1.7194	0.0014	0.03574	yes	51.4256	45.5127	40.9552	55.8243	55.2715	56.3283		1.77067	0.564758
ENSMUSG00000000567	Sox9	11:112782223-112787760	OK	18.4187	22.3922	0.281828	1.21573	1.6731	0.0015	0.0376527	yes	22.4631	17.951	14.8419	20.9989	23.6033	23.9677		0.379388	2.63582
ENSMUSG00000038677	Scube3	17:28142315-28174852	OK	16.1097	19.8483	0.301087	1.23207	1.59958	0.00195	0.0460775	yes	17.0901	15.7479	15.4911	21.2706	18.5134	18.3386		5.39041	0.185515
ENSMUSG00000020099	Unc5b	10:60762609-60831581	OK	11.5028	14.1915	0.303043	1.23374	1.79853	0.0005	0.0156708	yes	12.3567	11.4521	10.6997	13.7742	15.0641	14.1536		2.63717	0.379194
ENSMUSG00000037211	Spry1	3:37638578-37644598	OK	17.7957	22.0292	0.307885	1.23789	1.73092	0.0014	0.03574	yes	18.4206	17.4098	17.5568	21.8483	24.2308	20.1892		1.70585	0.586217
ENSMUSG00000031119	Gpc4	X:52053020-52165252	OK	13.7578	17.0617	0.310519	1.24015	1.71932	0.00125	0.0331933	yes	13.781	15.4871	12.0051	16.2284	18.6199	17.1703		7.10112	0.140823
ENSMUSG00000020423	Btg2	1:134075169-134079120	OK	13.3822	16.6254	0.313069	1.24235	1.74071	0.00095	0.0265952	yes	13.6147	13.0134	13.5185	16.3194	16.5031	17.3595		2.68027	0.373097
ENSMUSG00000062960	Kdr	5:75932826-75978458	OK	6.58396	8.19051	0.314998	1.24401	1.77047	0.00075	0.0222401	yes	6.86692	7.19431	5.69065	8.63395	7.96398	7.53016		0.00801974	124.692
ENSMUSG00000021364	Elovl2	13:41182494-41220405	OK	11.8123	14.8086	0.32614	1.25365	1.86696	0.00035	0.0114701	yes	12.1888	12.2942	10.9541	15.4496	14.1165	14.2187		0.789231	1.26706
ENSMUSG00000020902	Ntn1	11:68209363-68400823	OK	6.68739	8.3949	0.328071	1.25533	1.72325	0.00115	0.0310368	yes	6.38066	7.33542	6.34608	7.19127	9.5846	9.61247		17.949	0.0557134
ENSMUSG00000003534	Ddr1	17:35681566-35708244	OK	20.6049	25.8844	0.329096	1.25623	1.68701	0.0009	0.0254108	yes	21.5384	20.579	19.6974	25.705	26.2573	25.8703		33.9492	0.0294558
ENSMUSG00000036904	Fzd8	18:9212855-9216201	OK	9.21308	11.5832	0.330278	1.25726	1.77835	0.001	0.0277131	yes	9.39699	11.1091	7.13311	10.1602	14.1733	11.8391		5.02382	0.199052
ENSMUSG00000028444	Cntfr	4:41657497-41697089	OK	18.7663	23.6097	0.331235	1.25809	1.73483	0.0013	0.0339748	yes	20.7216	20.2653	15.312	25.4174	22.2142	21.3898		0.939786	1.06407
ENSMUSG00000038156	Spon1	7:113765997-114043370	OK	4.18896	5.2877	0.336048	1.26229	1.76607	0.0009	0.0254108	yes	4.92024	3.70995	3.93669	5.49765	5.23475	4.92073		0.226224	4.4204
ENSMUSG00000022332	Khdrbs3	15:68928419-69093512	OK	36.5818	46.3694	0.342046	1.26755	2.02347	0.0002	0.00702851	yes	38.4881	34.7265	36.5308	49.0814	43.4677	43.8471		3.31981	0.301222
ENSMUSG00000004319	Clcn3	8:60910388-60983300	OK	6.75957	8.59686	0.346879	1.27181	1.75021	0.0011	0.029932	yes	6.63529	7.32229	6.32112	9.22695	7.43201	8.50153		2.38808	0.418747
ENSMUSG00000020598	Nrcam	12:44328884-44601846	OK	1.93676	2.47056	0.351195	1.27562	1.63501	0.0021	0.0489911	yes	2.07425	1.84693	1.8891	2.1023	2.7836	2.89405		10.5947	0.0943871
ENSMUSG00000052727	Map1b	13:99421463-99516602	OK	11.2336	14.3359	0.351802	1.27615	2.14634	5e-05	0.002075	yes	10.1768	12.2191	11.3051	13.0011	14.8198	16.5215		2.40492	0.415815
ENSMUSG00000031207	Msn	X:96096041-96168552	OK	38.1651	48.7719	0.353796	1.27792	2.15814	0.0001	0.00392328	yes	39.8432	40.1969	34.4553	51.1683	45.9345	46.8164		0.229849	4.35067
ENSMUSG00000026797	Stxbp1	2:32787601-32848168	OK	6.3923	8.17752	0.355328	1.27928	1.70051	0.00185	0.0444134	yes	7.80417	5.85278	5.51996	8.06878	8.24112	8.33138		0.228326	4.3797
ENSMUSG00000047844	Bex4	X:136138995-136140443	OK	63.5202	81.291	0.35588	1.27977	2.02271	0.00015	0.00546921	yes	64.9919	61.6846	63.8841	85.8678	72.7342	80.6942		2.07623	0.481642
ENSMUSG00000045092	S1pr1	3:115710432-115715072	OK	5.64862	7.23476	0.357047	1.2808	1.72691	0.0019	0.0451544	yes	5.30157	6.26333	5.38096	7.74718	6.8593	6.58539		0.206409	4.84475
ENSMUSG00000001473	Tubb6	18:67390716-67402748	OK	40.7044	52.2272	0.359616	1.28308	2.12824	5e-05	0.002075	yes	41.2387	42.1039	38.7706	57.7954	49.0418	44.2761		0.638133	1.56707
ENSMUSG00000052504	Epha3	16:63543537-63864158	OK	10.0487	12.9002	0.360381	1.28376	2.10565	0.0001	0.00392328	yes	8.68839	11.7624	9.69542	11.9067	14.2803	13.5071		0.0467235	21.4025
ENSMUSG00000069227	Gprin1	13:54736670-54749874	OK	4.26157	5.4722	0.360735	1.28408	1.7609	0.001	0.0277131	yes	4.45854	4.5387	3.78749	4.96037	5.84002	6.12807		1.1542	0.866403
ENSMUSG00000038587	Akap12	10:4266328-4359468	OK	6.06008	7.78384	0.361145	1.28444	2.02946	5e-05	0.002075	yes	6.02814	6.53749	5.61461	8.14475	7.59802	7.24786		3.24796	0.307886
ENSMUSG00000038602	Slc35f1	10:52690532-53111622	OK	3.7485	4.81844	0.362252	1.28543	1.79027	0.00095	0.0265952	yes	3.72149	4.12942	3.39458	4.35675	5.27107	5.28917		2.87535	0.347784
ENSMUSG00000092060	Bend4	5:67392146-67437990	OK	4.78732	6.15462	0.362451	1.28561	1.99882	0.00015	0.00546921	yes	5.70315	3.77637	4.88245	6.50799	5.66725	5.93526		1.56415	0.639324
ENSMUSG00000028645	Slc2a1	4:119108710-119138801	OK	50.3926	64.9844	0.366882	1.28956	2.12148	5e-05	0.002075	yes	53.3497	54.2101	43.6179	70.1891	68.8876	50.6717		3.20207	0.312298
ENSMUSG00000022309	Angpt1	15:42424726-42704616	OK	3.3935	4.37727	0.367257	1.2899	1.71645	0.0015	0.0376527	yes	3.29611	3.16929	3.71511	4.5897	4.19909	4.13058		0.660083	1.51496
ENSMUSG00000004891	Nes	3:87971077-87980451	OK	38.8042	50.6219	0.383547	1.30455	2.32863	5e-05	0.002075	yes	38.7224	42.3843	35.3059	47.1527	55.8668	52.3153		0.718554	1.39168
ENSMUSG00000027996	Sfrp2	3:83766320-83789956	OK	38.3423	50.1251	0.386598	1.30731	1.96486	0.00015	0.00546921	yes	39.8766	40.4787	34.6715	47.6515	51.693	53.5045		0.373201	2.67952
ENSMUSG00000024376	Epb41l4a	18:33796326-34007206	OK	3.11343	4.07137	0.387012	1.30768	1.72679	0.00135	0.0349498	yes	3.66642	2.79693	2.87693	4.20486	3.81071	4.06506		5.07695	0.196969
ENSMUSG00000079259	Trim71	9:114507132-114564369	OK	3.39201	4.44213	0.389111	1.30959	2.11958	5e-05	0.002075	yes	3.76795	3.28429	3.12379	5.42971	3.43827	3.47081		0.879776	1.13665
ENSMUSG00000031342	Gpm6b	X:166238910-166388988	OK	10.6247	13.9253	0.390285	1.31065	2.08251	5e-05	0.002075	yes	10.0113	11.4077	10.4551	11.9387	15.9959	15.8277		1.28295	0.779453
ENSMUSG00000048490	Nrip1	16:76287399-76373827	OK	7.3309	9.62079	0.392166	1.31236	1.85868	0.0001	0.00392328	yes	7.53951	7.59443	6.85876	10.8093	8.24186	8.62271		1.33783	0.747477
ENSMUSG00000039347	Atp6v0e2	6:48537614-48541801	OK	6.63468	8.74267	0.398047	1.31772	1.68877	0.0017	0.0416601	yes	6.5779	6.78889	6.53726	8.75176	9.00775	8.45942		3.53367	0.282992
ENSMUSG00000032997	Chpf	1:75474568-75479307	OK	10.7615	14.2314	0.403205	1.32244	2.13639	5e-05	0.002075	yes	11.9784	10.4149	9.89099	15.4004	13.513	12.6119		1.029	0.971815
ENSMUSG00000031684	Slc10a7	8:78509345-78734003	OK	7.20801	9.54983	0.405874	1.32489	1.64276	0.0015	0.0376527	yes	8.03384	6.98648	6.60371	12.2953	7.37189	6.2368		1.12821	0.886357
ENSMUSG00000017723	Wfdc2	2:164562412-164568510	OK	46.4063	61.581	0.408164	1.327	1.68772	0.00215	0.0499459	yes	48.9987	36.3449	53.8754	67.5108	57.666	53.6364		10.0431	0.0995711
ENSMUSG00000044461	Shisa2	14:59625280-59631658	OK	23.9751	32.0058	0.416797	1.33496	2.48744	5e-05	0.002075	yes	24.4512	26.6879	20.7862	30.6251	32.5227	34.2504		0.546329	1.8304
ENSMUSG00000035566	Pcdh17	14:84443562-84537060	OK	1.49662	1.99901	0.417574	1.33568	1.96572	0.00025	0.00851392	yes	1.52898	1.50815	1.45274	2.00427	1.78488	2.20261		0.606271	1.64943
ENSMUSG00000020733	Slc9a3r1	11:115163340-115181181	OK	14.3048	19.1112	0.417918	1.336	2.21484	5e-05	0.002075	yes	16.2498	12.8758	13.7889	19.473	18.406	19.093		26.0847	0.0383366
ENSMUSG00000033948	Zswim5	4:116877375-116989264	OK	5.66569	7.57285	0.418586	1.33662	2.29987	0.00015	0.00546921	yes	5.58272	5.80441	5.60993	7.71585	7.52467	7.33502		3.75971	0.265978
ENSMUSG00000097391	Mirg	12:109729763-109749460	OK	25.0345	33.467	0.418823	1.33684	1.63397	0.00205	0.0480964	yes	25.2034	28.1484	21.7516	34.1492	34.868	30.7017		1.56136	0.640466
ENSMUSG00000035277	Arx	X:93286444-93298357	OK	3.17061	4.23971	0.419204	1.33719	1.71676	0.00165	0.0406762	yes	3.20149	3.59583	2.71451	3.87975	4.78108	4.41826		0.503918	1.98445
ENSMUSG00000000275	Trim25	11:88999375-89020293	OK	2.00391	2.68337	0.421229	1.33907	1.68607	0.002	0.047057	yes	2.0563	2.30297	1.65247	2.42456	2.92664	2.95773		2.04786	0.488316
ENSMUSG00000032118	Fez1	9:36821938-36878924	OK	32.9217	44.1174	0.422308	1.34007	1.98281	5e-05	0.002075	yes	27.5736	35.3813	35.8103	41.1274	48.2556	45.9592		0.0223751	44.6925
ENSMUSG00000028273	Pdlim5	3:142239589-142395696	OK	7.90604	10.5981	0.422772	1.3405	1.79132	0.00085	0.024374	yes	8.8372	6.87168	8.00924	11.4043	9.25497	10.3286		1.33732	0.747766
ENSMUSG00000055639	Dach1	14:97786852-98169765	OK	8.47645	11.3784	0.424763	1.34235	2.40508	5e-05	0.002075	yes	9.14174	8.2078	8.07981	12.6118	9.5952	10.6947		0.527274	1.89655
ENSMUSG00000014602	Kif1a	1:93015463-93101951	OK	3.94344	5.29404	0.424917	1.3425	1.82999	0.0001	0.00392328	yes	4.01688	3.9608	3.85263	4.99885	5.72732	5.45116		4.95385	0.201863
ENSMUSG00000068923	Syt11	3:88744699-88775164	OK	22.1553	29.7472	0.4251	1.34267	1.92892	0.00015	0.00546921	yes	22.0952	24.3923	19.9784	27.6893	32.6136	30.9967		1.79299	0.557728
ENSMUSG00000025266	Gnl3l	X:150983140-151017322	OK	17.5459	23.6314	0.429566	1.34683	1.84447	0.0002	0.00702851	yes	17.3137	18.3616	16.9625	23.4048	22.9058	24.8102		1.03253	0.968493
ENSMUSG00000025666	Tmem47	X:81070693-81097872	OK	18.8922	25.6202	0.43949	1.35612	2.12608	0.0003	0.00993006	yes	20.4129	16.5129	19.7509	28.1442	20.6291	25.5634		1.82177	0.548917
ENSMUSG00000020950	Foxg1	12:49382659-49407360	OK	23.0107	31.234	0.440815	1.35737	2.1193	0.0001	0.00392328	yes	21.5921	28.2991	19.1408	26.4096	39.8195	32.2974		106.028	0.00943147
ENSMUSG00000030411	Nova2	7:18925887-18965319	OK	1.5871	2.15553	0.441646	1.35815	1.97466	0.0002	0.00702851	yes	1.61657	1.56958	1.57516	2.01356	2.14941	2.44558		0.738579	1.35395
ENSMUSG00000022346	Myc	15:61985340-61990374	OK	18.7159	25.4351	0.442556	1.35901	2.1209	5e-05	0.002075	yes	21.6513	18.7833	15.713	29.2924	23.5121	19.6434		0.401811	2.48873
ENSMUSG00000063804	Lin28b	10:45376619-45470201	OK	17.7949	24.1953	0.443262	1.35968	2.65383	5e-05	0.002075	yes	19.7169	17.4046	16.2632	29.5449	17.949	19.7423		0.582084	1.71797
ENSMUSG00000078202	Nrarp	2:25180757-25183339	OK	18.4394	25.1262	0.446405	1.36264	2.55972	5e-05	0.002075	yes	20.595	18.7933	15.9298	23.3643	29.0387	24.7377		6.28869	0.159016
ENSMUSG00000097156	Gm3764	3:88206812-88229959	OK	25.8641	35.2737	0.447641	1.36381	1.88463	0.00065	0.0196271	yes	25.5095	28.507	23.5759	32.3113	37.1753	39.2968		0.906176	1.10354
ENSMUSG00000022949	Clic6	16:92478741-92541243	OK	3.20305	4.37162	0.448719	1.36483	1.73457	0.0013	0.0339748	yes	3.71816	2.78442	3.10658	4.61095	3.82438	4.4402		145.871	0.00685537
ENSMUSG00000038560	Sp6	11:97013393-97026248	OK	2.38441	3.25834	0.450506	1.36652	1.86376	0.0006	0.0183863	yes	2.672	2.07941	2.40182	3.17594	3.07659	3.60489		201.602	0.00496027
ENSMUSG00000062542	Syt9	7:107370727-107548656	OK	2.45346	3.35305	0.450657	1.36666	1.7275	0.00085	0.024374	yes	2.72955	2.35559	2.27523	3.67273	2.77875	3.28799		1.99486	0.501288
ENSMUSG00000031548	Sfrp1	8:23411501-23449632	OK	39.0854	53.5177	0.453387	1.36925	2.77378	5e-05	0.002075	yes	37.9235	44.5614	34.7712	56.445	53.3181	47.8627		0.657437	1.52106
ENSMUSG00000028456	Unc13b	4:43058952-43264871	OK	4.59054	6.29052	0.454514	1.37032	1.6161	0.00155	0.0386727	yes	4.72265	4.51164	4.53734	6.08378	6.27351	6.721		9.94653	0.100538
ENSMUSG00000093460	Six3os1	17:85600650-85629302	OK	21.5738	29.6455	0.458529	1.37414	1.52805	0.0021	0.0489911	yes	23.1749	19.6641	21.8825	27.9618	31.2463	31.4119		222.549	0.00449339
ENSMUSG00000060487	Samd5	10:9627258-9675208	OK	4.65722	6.40254	0.459175	1.37476	2.02802	0.0003	0.00993006	yes	4.83458	3.68706	5.45003	5.60453	6.83584	7.56529		7.69776	0.129908
ENSMUSG00000053137	Mapk11	15:89142485-89149606	OK	8.02091	11.0305	0.459663	1.37522	2.29222	5e-05	0.002075	yes	8.86788	8.24855	6.94628	11.8645	10.0425	10.3506		1.68327	0.594082
ENSMUSG00000040856	Dlk1	12:109452822-109463336	OK	321.971	443.286	0.461306	1.37679	2.13353	0.00015	0.00546921	yes	365.824	324.454	275.636	445.375	474.594	407.8		1.62147	0.616724
ENSMUSG00000022454	Nell2	15:95219450-95528706	OK	11.3108	15.5735	0.46139	1.37687	2.52595	5e-05	0.002075	yes	10.9535	12.0801	10.8989	14.4703	17.2803	16.0729		16.761	0.0596622
ENSMUSG00000052852	Reep1	6:71707560-71810710	OK	5.41678	7.48779	0.467105	1.38233	2.01662	0.0002	0.00702851	yes	5.69259	5.43763	5.12012	8.6463	6.65978	5.9988		1.06625	0.937863
ENSMUSG00000027966	Col11a1	3:114030539-114220718	OK	8.67436	12.0031	0.468581	1.38375	2.0824	0.00015	0.00546921	yes	9.07907	8.20473	8.73928	11.8569	12.3759	11.9228		1.43185	0.698395
ENSMUSG00000031226	Pbdc1	X:105079755-105117090	OK	30.1766	41.7953	0.46991	1.38502	2.67952	5e-05	0.002075	yes	29.9216	30.024	30.5843	42.7454	39.0241	42.6664		0.71583	1.39698
ENSMUSG00000095930	Nim1k	13:119710093-119755882	OK	1.03123	1.42948	0.471127	1.38619	1.63927	0.00185	0.0444134	yes	1.20212	0.994047	0.89751	1.47987	1.54121	1.21697		0.341218	2.93068
ENSMUSG00000041313	Slc7a1	5:148327409-148399904	OK	2.98945	4.15195	0.47391	1.38887	2.08588	5e-05	0.002075	yes	2.6118	2.83353	3.52302	4.16306	4.38272	3.89897		1.37524	0.727144
ENSMUSG00000021182	Ccdc88c	12:100912699-101028983	OK	3.65266	5.07534	0.474558	1.38949	2.47455	5e-05	0.002075	yes	3.6092	3.87969	3.46908	5.38437	5.0914	4.4412		7.16732	0.139522
ENSMUSG00000027276	Jag1	2:137081455-137116644	OK	4.8282	6.72475	0.477994	1.39281	2.01844	0.0001	0.00392328	yes	5.23125	5.15752	4.09583	6.92123	6.42618	6.63034		4.68623	0.213391
ENSMUSG00000062961	Ccdc177	12:80754045-80761267	OK	1.48521	2.08163	0.487045	1.40157	2.01519	0.00045	0.0142116	yes	1.5846	1.36307	1.50796	1.97489	2.34266	2.03407		1.94547	0.514015
ENSMUSG00000031626	Sorbs2	8:45507787-45827906	OK	8.12151	11.396	0.488714	1.40319	1.41161	0.002	0.047057	yes	7.98411	8.42809	7.95232	9.92753	11.8824	13.8468		3.36105	0.297526
ENSMUSG00000036896	C1qc	4:136889803-136893065	OK	3.66783	5.14906	0.48938	1.40384	1.65211	0.0021	0.0489911	yes	2.32361	4.7282	3.95168	4.63691	6.08264	5.23977		0.0603499	16.57
ENSMUSG00000027199	Gatm	2:122594466-122611303	OK	4.24023	5.95496	0.489949	1.4044	2.04537	5e-05	0.002075	yes	3.51176	4.81972	4.38921	6.3032	5.76011	5.45332		1.12022	0.89268
ENSMUSG00000070643	Sox13	1:133382302-133424377	OK	14.902	20.9305	0.490099	1.40454	2.06173	0.00015	0.00546921	yes	17.992	14.8199	11.8941	23.4703	19.0488	17.7326		1.81189	0.55191
ENSMUSG00000031665	Sall1	8:89027234-89044162	OK	4.16337	5.84775	0.49013	1.40457	2.52473	5e-05	0.002075	yes	4.13266	4.87609	3.48135	5.41163	6.13857	6.42916		2.26859	0.440803
ENSMUSG00000095041	AC149090.1	JH584304.1:52189-59690	OK	4.27292	6.00684	0.491385	1.40579	2.12503	0.0002	0.00702851	yes	5.25693	3.1566	4.40523	5.89061	6.14241	6.10374		0	0
ENSMUSG00000055254	Ntrk2	13:58806595-59133970	OK	1.65728	2.33356	0.493715	1.40807	2.21721	5e-05	0.002075	yes	1.94451	1.51746	1.50986	2.35594	2.32045	2.30189		1.28503	0.778195
ENSMUSG00000048388	Fam171b	2:83812635-83883486	OK	10.1381	14.2834	0.49455	1.40888	1.69404	0.0016	0.0398	yes	9.80911	10.155	10.4502	13.678	13.7394	16.038		0.770463	1.29792
ENSMUSG00000072568	Fam84b	15:60818993-60853778	OK	7.22968	10.1922	0.495462	1.40977	2.5231	5e-05	0.002075	yes	6.97534	7.03751	7.6762	10.9696	9.05913	9.77051		7.47517	0.133776
ENSMUSG00000042873	Lhfpl4	6:113168089-113195384	OK	2.67082	3.77795	0.500318	1.41453	2.0619	0.00025	0.00851392	yes	2.50396	3.11491	2.3936	3.58646	4.0737	3.86516		0.689718	1.44987
ENSMUSG00000021010	Npas3	12:53248676-54079392	OK	1.25416	1.78167	0.506509	1.42061	2.03873	0.00015	0.00546921	yes	1.21614	1.3342	1.21214	1.59164	1.94944	1.99395		1.71093	0.584479
ENSMUSG00000031073	Fgf15	7:144894559-144910085	OK	12.5796	17.9081	0.509522	1.42358	2.48653	5e-05	0.002075	yes	12.4446	14.3013	10.993	17.6225	20.5189	15.8684		14.374	0.0695699
ENSMUSG00000026383	Epb41l5	1:119545036-119649000	OK	6.97772	9.95596	0.512805	1.42682	1.985	0.0002	0.00702851	yes	7.34696	6.95166	6.63455	10.325	9.02811	10.1458		10.1664	0.098363
ENSMUSG00000031837	Necab2	8:119446718-119472640	OK	11.9244	17.0168	0.513039	1.42705	2.0985	0.00025	0.00851392	yes	12.4907	12.9445	10.3381	19.2577	15.3147	14.2371		1.38111	0.724057
ENSMUSG00000045005	Fzd5	1:64730557-64740607	OK	2.58724	3.69665	0.514803	1.4288	2.50788	5e-05	0.002075	yes	2.8914	2.67648	2.19385	3.66268	3.5276	3.93363		4.99152	0.20034
ENSMUSG00000024304	Cdh2	18:16588876-16809246	OK	42.3356	60.5149	0.515419	1.42941	3.12357	5e-05	0.002075	yes	46.6853	44.4105	35.9111	60.9483	61.4332	58.7299		1.72321	0.580313
ENSMUSG00000048814	Lonrf2	1:38793644-38836711	OK	1.60502	2.30249	0.520605	1.43456	2.09852	0.00015	0.00546921	yes	1.70756	1.48146	1.62605	2.45746	1.93834	2.35671		2.47448	0.404125
ENSMUSG00000024805	Pcgf5	19:36379066-36456192	OK	2.20243	3.16853	0.524721	1.43866	1.68046	0.00195	0.0460775	yes	2.24883	1.95748	2.40097	3.67755	2.69986	2.61918		3.47182	0.288033
ENSMUSG00000020583	Matn3	12:8947928-8972028	OK	1.12541	1.62184	0.527177	1.44111	1.729	0.00175	0.042507	yes	1.36971	1.02972	0.976806	1.68456	1.45779	1.66045		1.55396	0.643518
ENSMUSG00000019894	Slc6a15	10:103367807-103419378	OK	2.08795	3.01164	0.528459	1.44239	2.123	0.0001	0.00392328	yes	2.13498	1.87863	2.25025	3.0219	2.99968	3.00308		1.03081	0.970108
ENSMUSG00000001751	Naglu	11:101070011-101077672	OK	2.16304	3.13223	0.534133	1.44807	1.68691	0.00185	0.0444134	yes	2.64661	2.17952	1.66298	3.46396	3.05384	2.54717		1.6347	0.611733
ENSMUSG00000025332	Kdm5c	X:152233019-152274535	OK	28.1306	40.7638	0.535146	1.44909	1.76018	0.0007	0.0207948	yes	27.3619	30.9522	26.0778	41.2665	39.2445	41.2776		1.06813	0.936218
ENSMUSG00000026728	Vim	2:13573926-13582826	OK	375.215	543.955	0.53577	1.44972	2.27276	5e-05	0.002075	yes	398.767	413.42	313.457	549.8	581.962	494.256		0.326375	3.06396
ENSMUSG00000030674	Qprt	7:127107113-127122226	OK	1.63036	2.36388	0.535966	1.44991	1.6259	0.0018	0.0435933	yes	1.66501	1.80489	1.42117	2.81422	2.38682	1.44025		0.705363	1.41771
ENSMUSG00000042684	Npl	1:153503014-153550045	OK	4.37943	6.35805	0.53784	1.4518	2.137	5e-05	0.002075	yes	4.0605	4.82409	4.25372	6.70409	6.13563	5.88839		0.366098	2.73151
ENSMUSG00000068079	Tcf15	2:152143560-152149097	OK	4.83987	7.02877	0.538306	1.45227	1.84256	0.0008	0.0233044	yes	6.01047	4.35555	4.15357	5.71707	9.33435	7.34661		0.0312272	32.0233
ENSMUSG00000006930	Hap1	11:100347326-100356128	OK	8.50127	12.3828	0.542589	1.45658	1.74739	0.00175	0.042507	yes	8.95311	10.0479	6.50285	12.5839	12.6451	11.7184		10.0845	0.0991622
ENSMUSG00000022240	Ctnnd2	15:30172592-31029311	OK	2.45449	3.57974	0.544435	1.45845	2.58484	5e-05	0.002075	yes	2.63938	2.61584	2.10825	3.33387	3.87499	3.77624		25.7532	0.0388302
ENSMUSG00000035873	Pawr	10:108332188-108414391	OK	7.85133	11.4612	0.545753	1.45978	2.53321	5e-05	0.002075	yes	9.04315	7.36279	7.14806	11.2215	12.6519	10.75		7.11402	0.140567
ENSMUSG00000050875	A730017C20Rik	18:59062247-59076962	OK	9.83555	14.365	0.546478	1.46052	2.18777	0.0001	0.00392328	yes	9.21929	9.3001	10.9873	14.0815	13.596	15.701		6.78413	0.147403
ENSMUSG00000027217	Tspan18	2:93201759-93334505	OK	8.94614	13.0813	0.548173	1.46223	2.35103	5e-05	0.002075	yes	10.7633	8.57871	7.49639	14.7953	12.1278	10.6069		0.192147	5.20434
[truncated: 236 more rows]

## Sheet: Figure_7E
test_id	gene	locus	status	value_1	value_2	log2(fold_change)	fc	test_stat	p_value	q_value	significant	CTRL_1	CTRL_2	CTRL_3	ABC_1	ABC_2	ABC_3		ECT enr	MES enr	Group
[truncated: 438 more rows]

[truncated: 5 more sheets: Figure_7E_Q1Q2, Figure_7E_Q3Q4, WNT-related_ALL, WNT-related_Q1, Curated List]
