# Supplementary material for: AP-2α and AP-2β cooperatively function in the craniofacial surface ectoderm to regulate chromatin and gene expression dynamics during facial development
Source: eLife. 2022 Mar 25;11:e70511. doi: 10.7554/eLife.70511 (PMC9038197; doi:10.7554/eLife.70511)
Supplement: Supplementary file 4. [file elife-70511-supp4.xlsx]

## Sheet: Sheet1
	PRIMER	SEQUENCE (5' --> 3')	TM (C°)	NOTES
	AlflpCreR1	GTAACGTTGGCAGCTTTACGTCTCCCTGCTGGC	70	Detects wild-type (230 bp) and conditional (265 bp) alleles for Tfap2a
	AlflpCreF1	GCTCTCTCTTTTCCTGCCTTGGAACCATGACCCTCAG
	Bfl606	GTTGCTCTCCTTACAGGGGAAGCTGTTCACTTAGCTCGGG	70	Detects wild-type (256 bp) and conditional (330 bp) alleles for Tfap2b
	Bfl2	TCTGGCAAGGCTCTTTCGGGGCACTCACAGCAG
	CRECT 11B	CCTCACTGATCCACATATGTCCTTCCGAAAGCTGC	70	Detects CRECT transgene allele (385 bp) and generates a positive control PCR product (586 bp)
	CRECT 11Y	GATGCTAGAAAGCTGAGGCTGGGCTTAGCTTGCTAGGC
	crect54	CTACGCCGCGAACTTGCTTCTAGAGCG
	Axin2 F	AAGCTGCGTCGGATACTTGAGA	65	Detects Axin2-lacZ knock-in allele (400 bp) and generates a positive control PCR product (493 bp)
	Axin2 R	AGTCCATCTTCATTCCGCCTAGC
	Axin2 LZ R	TGGTAATGCTGCAGTGGCTTG
	Supplemental Table 4. Summary of the primers used for genotyping embryos.
